# Supplementary material for: Unique Features of Satellite DNA Transcription in Different Tissues of Caenorhabditis elegans
Source: MDPI journal article supplement (doi:10.3390/ijms24032970), 2023-02-03
Supplement: s1 [file s1]

**Table S1. Properties of all satellites**

| Genome                                                                                                                               | Satellite name                                | Chromosome | Start  | End    | Sat.length | Nr Repts | Rpt.length |
|--------------------------------------------------------------------------------------------------------------------------------------|-----------------------------------------------|------------|--------|--------|------------|----------|------------|
| In the second line are given the seed motif and the sequence of a representative repeat                                              |                                               |            |        |        |            |          |            |
| Cele.WB235                                                                                                                           | Cele.WB235_1:1                                | 1          | 1      | 835    | 835        | 55       | 12         |
| CTAAGCCTAA                                                                                                                           | CTAAGCCTAAGC                                  |            |        |        |            |          |            |
| Cele.WB235                                                                                                                           | Cele.WB235_1:222749                           | 1          | 222749 | 222854 | 106        | 5        | 15         |
| AGACCCATCG                                                                                                                           | AGACCCATCGTGGTG                               |            |        |        |            |          |            |
| Cele.WB235                                                                                                                           | Cele.WB235_1:280525                           | 1          | 280525 | 281393 | 869        | 23       | 38         |
| AAATTTTAAT                                                                                                                           | AAATTTTAATTTTTGAAAATATTTTGGCGGGAATTTA         |            |        |        |            |          |            |
| Cele.WB235                                                                                                                           | Cele.WB235_1:281468                           | 1          | 281468 | 282278 | 811        | 52       | 15         |
| TCGTGGTGAG                                                                                                                           | TCGTGGTGAGACCCA                               |            |        |        |            |          |            |
| Cele.WB235                                                                                                                           | Cele.WB235_1:308028                           | 1          | 308028 | 308148 | 121        | 7        | 15         |
| GAGACCCATC                                                                                                                           | GAGACCCATCGTGGC                               |            |        |        |            |          |            |
| Cele.WB235                                                                                                                           | Cele.WB235_1:334679                           | 1          | 334679 | 335159 | 481        | 12       | 40         |
| AATTTTCTCG                                                                                                                           | AATTTTCTCGAAATTTTCAGAAGGTTCTAGAATATTTTCAG     |            |        |        |            |          |            |
| Cele.WB235                                                                                                                           | Cele.WB235_1:338561                           | 1          | 338561 | 341137 | 2577       | 14       | 184        |
| GAATACAGAA                                                                                                                           |                                               |            |        |        |            |          |            |
| GAATACAGAACCAATTATGCCCGAGAAAAAGATCCTACTCAGAATATAAACATAGTCAAATTTATCGGATGTATAAAGATTCCCGAAGACACTTTCCAATTACCCAAATTGTTTCATATTCTAAATCAAATT |                                               |            |        |        |            |          |            |
| CTCTTACTAGAACGCTCTTGGCCAAATGTACGCAGCCGAACGTATCATAAGT                                                                                 |                                               |            |        |        |            |          |            |
| Cele.WB235                                                                                                                           | Cele.WB235_1:354705                           | 1          | 354705 | 355291 | 587        | 29       | 19         |
| TATCGATTTT                                                                                                                           | TATCGATTTTCCTGAAATT                           |            |        |        |            |          |            |
| Cele.WB235                                                                                                                           | Cele.WB235_1:359078                           | 1          | 359078 | 359230 | 153        | 8        | 19         |
| GTACTACCTT                                                                                                                           | GTACTACCTTTTAATGTAT                           |            |        |        |            |          |            |
| Cele.WB235                                                                                                                           | Cele.WB235_1:477877                           | 1          | 477877 | 478046 | 170        | 13       | 12         |
| TAGGCTTAGG                                                                                                                           | TAGGCTTAGGCT                                  |            |        |        |            |          |            |
| Cele.WB235                                                                                                                           | Cele.WB235_1:556995                           | 1          | 556995 | 557143 | 149        | 8        | 12         |
| CTAAGCCTAA                                                                                                                           | CTAAGCCTAAGC                                  |            |        |        |            |          |            |
| Cele.WB235                                                                                                                           | Cele.WB235_1:562402                           | 1          | 562402 | 562457 | 56         | 5        | 11         |
| GTACTCCTAC                                                                                                                           | GTACTCCTAAA                                   |            |        |        |            |          |            |
| Cele.WB235                                                                                                                           | Cele.WB235_1:565592                           | 1          | 565592 | 565664 | 73         | 6        | 12         |
| GCGTTGCGTG                                                                                                                           | GCGTTGCGTGCC                                  |            |        |        |            |          |            |
| Cele.WB235                                                                                                                           | Cele.WB235_1:566943                           | 1          | 566943 | 567081 | 139        | 8        | 12         |
| AGGCCTAGGC                                                                                                                           | AGGCCTAGGCTT                                  |            |        |        |            |          |            |
| Cele.WB235                                                                                                                           | Cele.WB235_1:623235                           | 1          | 623235 | 624175 | 941        | 22       | 23         |
| AAAAAAAATT                                                                                                                           | AAAAAAAATTAAATTTTCAACG                        |            |        |        |            |          |            |
| Cele.WB235                                                                                                                           | Cele.WB235_1:640909                           | 1          | 640909 | 641017 | 109        | 6        | 12         |
| TAAGCCTAAG                                                                                                                           | TGAGCCTAAGCG                                  |            |        |        |            |          |            |
| Cele.WB235                                                                                                                           | Cele.WB235_1:669658                           | 1          | 669658 | 671715 | 2058       | 63       | 32         |
| GAATTCAAAT                                                                                                                           | GAATTCAAATTTCTGAGAAAAATTTAGGCGA               |            |        |        |            |          |            |
| Cele.WB235                                                                                                                           | Cele.WB235_1:676497                           | 1          | 676497 | 676765 | 269        | 6        | 45         |
| TCTGATCCTT                                                                                                                           | TCTGATCCTTCAGCTCCGAAGGATCACATGGGTACCTTCTGATGT |            |        |        |            |          |            |
| Cele.WB235                                                                                                                           | Cele.WB235_1:687047                           | 1          | 687047 | 687860 | 814        | 14       | 44         |
| TTTGCCGGTT                                                                                                                           | TTTGCCGGTTTGCCGATTGCCCCGACATTTTCAATTTTCGGCAA  |            |        |        |            |          |            |
| Cele.WB235                                                                                                                           | Cele.WB235_1:689715                           | 1          | 689715 | 689895 | 181        | 12       | 15         |
| GGTGAGACCC                                                                                                                           | GGTGAGACCCATCGT                               |            |        |        |            |          |            |
| Cele.WB235                                                                                                                           | Cele.WB235_1:724780                           | 1          | 724780 | 724948 | 169        | 4        | 42         |
| TTTGATCTAC                                                                                                                           | TTTGATCTACAAAAAATGCGGGAGTTTCCCAGCATTGCTCA     |            |        |        |            |          |            |
| Cele.WB235                                                                                                                           | Cele.WB235_1:727038                           | 1          | 727038 | 727274 | 237        | 5        | 12         |
| GCTTAGGCTT                                                                                                                           | GCTTAGGCTTAA                                  |            |        |        |            |          |            |

|                                                                                                                                    |                                            |   |         |         |      |    |     |
|------------------------------------------------------------------------------------------------------------------------------------|--------------------------------------------|---|---------|---------|------|----|-----|
| Cele.WB235                                                                                                                         | Cele.WB235_1:733645                        | 1 | 733645  | 734074  | 430  | 11 | 12  |
| GCAGGTAGGT                                                                                                                         | GCAGGTAGGTAG                               |   |         |         |      |    |     |
| Cele.WB235                                                                                                                         | Cele.WB235_1:749263                        | 1 | 749263  | 749839  | 577  | 36 | 16  |
| TTTCAGGCTT                                                                                                                         | TTTCAGGCTTTCAGGC                           |   |         |         |      |    |     |
| Cele.WB235                                                                                                                         | Cele.WB235_1:759087                        | 1 | 759087  | 759538  | 452  | 13 | 34  |
| TTTCTCAGAA                                                                                                                         | TTTCTCAGAAAATTTGAATTTCCCGCCAAAATTT         |   |         |         |      |    |     |
| Cele.WB235                                                                                                                         | Cele.WB235_1:765668                        | 1 | 765668  | 765992  | 325  | 27 | 12  |
| TCTAGGTCTA                                                                                                                         | TCTAGGTCTAAG                               |   |         |         |      |    |     |
| Cele.WB235                                                                                                                         | Cele.WB235_1:778056                        | 1 | 778056  | 778335  | 280  | 6  | 40  |
| GAACCTTCTG                                                                                                                         | GAACCTTCTGGAATATTTGAGAAAACCTCTAGAATGTTCTA  |   |         |         |      |    |     |
| Cele.WB235                                                                                                                         | Cele.WB235_1:779157                        | 1 | 779157  | 779331  | 175  | 12 | 12  |
| GCCTAAGCCT                                                                                                                         | GCCTAAGCCTAA                               |   |         |         |      |    |     |
| Cele.WB235                                                                                                                         | Cele.WB235_1:780732                        | 1 | 780732  | 781012  | 281  | 7  | 40  |
| TCTAGAACAT                                                                                                                         | TCTAGAACATTCCAGAATTTTCTCGAATTTTCCAAAAAGT   |   |         |         |      |    |     |
| Cele.WB235                                                                                                                         | Cele.WB235_1:806422                        | 1 | 806422  | 806644  | 223  | 16 | 12  |
| GCCTAAGCCT                                                                                                                         | GCCAAAGCCTGA                               |   |         |         |      |    |     |
| Cele.WB235                                                                                                                         | Cele.WB235_1:808432                        | 1 | 808432  | 808756  | 325  | 8  | 22  |
| TTAAAATTTT                                                                                                                         | TTAAAATTTTGTGAGTTTGACA                     |   |         |         |      |    |     |
| Cele.WB235                                                                                                                         | Cele.WB235_1:814462                        | 1 | 814462  | 814642  | 181  | 13 | 12  |
| GCTTAGGCTT                                                                                                                         | GCTTAGGCTTAG                               |   |         |         |      |    |     |
| Cele.WB235                                                                                                                         | Cele.WB235_1:823801                        | 1 | 823801  | 824454  | 654  | 29 | 21  |
| TGGCCTAGAT                                                                                                                         | TGGCCTCGATTCTGTACAGGG                      |   |         |         |      |    |     |
| Cele.WB235                                                                                                                         | Cele.WB235_1:833515                        | 1 | 833515  | 834452  | 938  | 48 | 12  |
| CTTAGGCTTA                                                                                                                         | CTCAGGCTTAGG                               |   |         |         |      |    |     |
| Cele.WB235                                                                                                                         | Cele.WB235_1:846174                        | 1 | 846174  | 846372  | 199  | 12 | 12  |
| GCTTAGGCTT                                                                                                                         | GCTTAGACTTAG                               |   |         |         |      |    |     |
| Cele.WB235                                                                                                                         | Cele.WB235_1:898453                        | 1 | 898453  | 898911  | 459  | 21 | 22  |
| TTTTAGCCAA                                                                                                                         | TTTTAACCAAAAAATCCGTTGA                     |   |         |         |      |    |     |
| Cele.WB235                                                                                                                         | Cele.WB235_1:902260                        | 1 | 902260  | 902411  | 152  | 8  | 15  |
| ATCTTCTTTT                                                                                                                         | ATCTTCTTTTGGTAA                            |   |         |         |      |    |     |
| Cele.WB235                                                                                                                         | Cele.WB235_1:923168                        | 1 | 923168  | 925176  | 2009 | 89 | 21  |
| AATTTCTAGG                                                                                                                         | AATTTCTAGGCCACGATCTGA                      |   |         |         |      |    |     |
| Cele.WB235                                                                                                                         | Cele.WB235_1:933478                        | 1 | 933478  | 934899  | 1422 | 52 | 27  |
| TATTTTACTC                                                                                                                         | TATTTTACTCTGTGGCTTCACCAAT                  |   |         |         |      |    |     |
| Cele.WB235                                                                                                                         | Cele.WB235_1:942559                        | 1 | 942559  | 942637  | 79   | 6  | 12  |
| AGCCTAAGCC                                                                                                                         | AGCCTAAGCCTA                               |   |         |         |      |    |     |
| Cele.WB235                                                                                                                         | Cele.WB235_1:942750                        | 1 | 942750  | 943044  | 295  | 24 | 12  |
| CTAAGTCTAA                                                                                                                         | CTAAGTCTAAGT                               |   |         |         |      |    |     |
| Cele.WB235                                                                                                                         | Cele.WB235_1:942557                        | 1 | 942557  | 943381  | 825  | 46 | 12  |
| TAAGCCTAAG                                                                                                                         | TAAGCCTAAGCC                               |   |         |         |      |    |     |
| Cele.WB235                                                                                                                         | Cele.WB235_1:961892                        | 1 | 961892  | 962564  | 673  | 16 | 42  |
| CCGGAATTTT                                                                                                                         | CCGGAATTTTCGAAAACCGGCAATTGCCGAAATTGCCCTTTG |   |         |         |      |    |     |
| Cele.WB235                                                                                                                         | Cele.WB235_1:976735                        | 1 | 976735  | 977538  | 804  | 5  | 162 |
| ATCATATGAA                                                                                                                         |                                            |   |         |         |      |    |     |
| ATCATATGAAGCGATTATTTTTCTTTTATAAACCTGTTGAGTTTGCATTATTATGAGAAAATCCTAGGCCAATTAGGCTAGCATGTACGGAAGTATTTTTTAAAAATTTATAAAAGTAATGAAAAGCTGA |                                            |   |         |         |      |    |     |
| TATTTTCAAAATTCAGAATGACGGAAAA                                                                                                       |                                            |   |         |         |      |    |     |
| Cele.WB235                                                                                                                         | Cele.WB235_1:991239                        | 1 | 991239  | 991341  | 103  | 8  | 12  |
| GGTCTAGGTC                                                                                                                         | GGTCTAGGTCTA                               |   |         |         |      |    |     |
| Cele.WB235                                                                                                                         | Cele.WB235_1:994259                        | 1 | 994259  | 994677  | 419  | 4  | 32  |
| CAAAATTTT                                                                                                                          | CAAAATTTTCTAAGAAAATTTGAATTTCCCGC           |   |         |         |      |    |     |
| Cele.WB235                                                                                                                         | Cele.WB235_1:1000379                       | 1 | 1000379 | 1000469 | 91   | 5  | 12  |
| AGCCTAAGCC                                                                                                                         | AGCATAAGCCTA                               |   |         |         |      |    |     |

|                                                                                                                                       |                                                                         |   |         |         |      |    |     |
|---------------------------------------------------------------------------------------------------------------------------------------|-------------------------------------------------------------------------|---|---------|---------|------|----|-----|
| Cele.WB235                                                                                                                            | Cele.WB235_1:1000380                                                    | 1 | 1000380 | 1000606 | 227  | 14 | 12  |
| GCCTAAGCCT                                                                                                                            | GCATAAGCCTAA                                                            |   |         |         |      |    |     |
| Cele.WB235                                                                                                                            | Cele.WB235_1:1012604                                                    | 1 | 1012604 | 1013479 | 876  | 25 | 35  |
| ATTTTCAATT                                                                                                                            | ATTTTCAATTCCGGCAATTGCGGATTGCGCGAA                                       |   |         |         |      |    |     |
| Cele.WB235                                                                                                                            | Cele.WB235_1:1083222                                                    | 1 | 1083222 | 1083538 | 317  | 8  | 35  |
| CGGCAAATCG                                                                                                                            | CGGCAAATCGGTATTTTGCCGAATTGAAAATTTT                                      |   |         |         |      |    |     |
| Cele.WB235                                                                                                                            | Cele.WB235_1:1097742                                                    | 1 | 1097742 | 1098271 | 530  | 23 | 23  |
| GGCCTAGAAA                                                                                                                            | GGCCTAGAAATACTGAAAGTGGT                                                 |   |         |         |      |    |     |
| Cele.WB235                                                                                                                            | Cele.WB235_1:1108035                                                    | 1 | 1108035 | 1108695 | 661  | 21 | 20  |
| ATTTCTAGGC                                                                                                                            | ATTTCTAGGCTATCGATGAG                                                    |   |         |         |      |    |     |
| Cele.WB235                                                                                                                            | Cele.WB235_1:1126721                                                    | 1 | 1126721 | 1126876 | 156  | 10 | 12  |
| CCTAAGCCTA                                                                                                                            | CCTAAGCCTAAG                                                            |   |         |         |      |    |     |
| Cele.WB235                                                                                                                            | Cele.WB235_1:1136040                                                    | 1 | 1136040 | 1136228 | 189  | 5  | 31  |
| ATTCCCGCCA                                                                                                                            | ATTCCCGCCAATTTTTTCTCAGAAATTTTGA                                         |   |         |         |      |    |     |
| Cele.WB235                                                                                                                            | Cele.WB235_1:1209321                                                    | 1 | 1209321 | 1210686 | 1366 | 32 | 43  |
| CCAGAAATTA                                                                                                                            | CCAGAAATTAGAATTTTCGGCAAATCGGCAAGCCGGCAAATTG                             |   |         |         |      |    |     |
| Cele.WB235                                                                                                                            | Cele.WB235_1:1211856                                                    | 1 | 1211856 | 1212413 | 558  | 15 | 35  |
| AAATCGGCAA                                                                                                                            | AAATCGGCAATATGCCTAAAATGAAAATTTCCGGC                                     |   |         |         |      |    |     |
| Cele.WB235                                                                                                                            | Cele.WB235_1:1214097                                                    | 1 | 1214097 | 1214254 | 158  | 7  | 11  |
| GTACTGTAGG                                                                                                                            | GTACTGTAGGG                                                             |   |         |         |      |    |     |
| Cele.WB235                                                                                                                            | Cele.WB235_1:1278237                                                    | 1 | 1278237 | 1279259 | 1023 | 33 | 19  |
| TTCTAGGCCA                                                                                                                            | TTCTAGGCCATCTGATAAT                                                     |   |         |         |      |    |     |
| Cele.WB235                                                                                                                            | Cele.WB235_1:1317490                                                    | 1 | 1317490 | 1319274 | 1785 | 47 | 38  |
| GGGAATTCAA                                                                                                                            | GGGAATTCAAACCTTTAATTTTTTTGAAAACATTTTGGC                                 |   |         |         |      |    |     |
| Cele.WB235                                                                                                                            | Cele.WB235_1:1322604                                                    | 1 | 1322604 | 1322925 | 322  | 5  | 42  |
| TTTGCCGGAA                                                                                                                            | TTTCCCGGAAGTTTTCATTTTCGACAAATTACCGATTTGTCTG                             |   |         |         |      |    |     |
| Cele.WB235                                                                                                                            | Cele.WB235_1:1362690                                                    | 1 | 1362690 | 1362850 | 161  | 5  | 32  |
| TCAGAAAATT                                                                                                                            | TCAGAAAATTTAAATTCGCGCAAAATTTTTC                                         |   |         |         |      |    |     |
| Cele.WB235                                                                                                                            | Cele.WB235_1:1408704                                                    | 1 | 1408704 | 1409384 | 681  | 8  | 71  |
| ATTTATGTGA                                                                                                                            | ATTTATGTGAAAATTCAGGTTTTTAGGGCATTTTTTGATGGAAATCTGAATATTTCCGCTTTTTCTGATGG |   |         |         |      |    |     |
| Cele.WB235                                                                                                                            | Cele.WB235_1:1429375                                                    | 1 | 1429375 | 1430301 | 927  | 24 | 35  |
| AAATTTGAAT                                                                                                                            | AAATCTGAATTTCCCGCAAAATTTTTTTTCTCAGA                                     |   |         |         |      |    |     |
| Cele.WB235                                                                                                                            | Cele.WB235_1:1430568                                                    | 1 | 1430568 | 1430936 | 369  | 14 | 11  |
| CTACAGTACT                                                                                                                            | CTACAGTAATT                                                             |   |         |         |      |    |     |
| Cele.WB235                                                                                                                            | Cele.WB235_1:1503613                                                    | 1 | 1503613 | 1504297 | 685  | 18 | 31  |
| GGTTACTGTA                                                                                                                            | GGTTACTGTAACTCAATTATAGGATTCTTCG                                         |   |         |         |      |    |     |
| Cele.WB235                                                                                                                            | Cele.WB235_1:1564845                                                    | 1 | 1564845 | 1565136 | 292  | 7  | 35  |
| CGGCAAATCG                                                                                                                            | CGGCAAATCGGCAAATGCGCGAATTGAAAATTTT                                      |   |         |         |      |    |     |
| Cele.WB235                                                                                                                            | Cele.WB235_1:1593120                                                    | 1 | 1593120 | 1594195 | 1076 | 5  | 189 |
| TTTTTTTTGA                                                                                                                            |                                                                         |   |         |         |      |    |     |
| TTTTTTTTTGACTATGGAATTATAAAGAAAATCGAATTTCAAAAAAGCATGTATTAGCCAATGTAAACGCGCTCCAATGATGATGTAGCCACGTGGTATCAGAGTGTCTCTTTACGGCTTGATTTAAATACGT |                                                                         |   |         |         |      |    |     |
| AGATCTACAAATTCACTTATCTGTTTTCTCACGGGTTTAGGATATTTTTTCTGTTA                                                                              |                                                                         |   |         |         |      |    |     |
| Cele.WB235                                                                                                                            | Cele.WB235_1:1605584                                                    | 1 | 1605584 | 1606132 | 549  | 6  | 35  |
| AAATTTTCAA                                                                                                                            | AAATTTTCAATTCCGGCATTTTGCCGATTTGCCGG                                     |   |         |         |      |    |     |
| Cele.WB235                                                                                                                            | Cele.WB235_1:1620047                                                    | 1 | 1620047 | 1620586 | 540  | 9  | 49  |
| CAATAATTTT                                                                                                                            | CAATAATTTTAAATGTAATTATCGATTTTCTAAATTTTGCCGAAAAAT                        |   |         |         |      |    |     |
| Cele.WB235                                                                                                                            | Cele.WB235_1:1652306                                                    | 1 | 1652306 | 1652642 | 337  | 16 | 21  |
| TCTCCTGGTA                                                                                                                            | TCTCCTGGTAAATTTAAAAAT                                                   |   |         |         |      |    |     |
| Cele.WB235                                                                                                                            | Cele.WB235_1:1653240                                                    | 1 | 1653240 | 1653360 | 121  | 7  | 12  |
| AGCCTAAACC                                                                                                                            | AGCCTAAACCTG                                                            |   |         |         |      |    |     |
| Cele.WB235                                                                                                                            | Cele.WB235_1:1658366                                                    | 1 | 1658366 | 1660394 | 2029 | 78 | 26  |
| CAAACCGGC                                                                                                                             | CAAACCGGCAATTGCCGAAAACTTC                                               |   |         |         |      |    |     |

|            |                                               |   |         |         |      |     |    |
|------------|-----------------------------------------------|---|---------|---------|------|-----|----|
| Cele.WB235 | Cele.WB235_1:1664772                          | 1 | 1664772 | 1664951 | 180  | 4   | 45 |
| TCTGATCCTT | TCTGATCCTTCAGCTCCGAAGGATCACATGGGTACCTTCTGATGT |   |         |         |      |     |    |
| Cele.WB235 | Cele.WB235_1:1704545                          | 1 | 1704545 | 1705424 | 880  | 24  | 30 |
| AATTTGAATT | AATTTGAATTTTCCTGGATTTTAAACGGA                 |   |         |         |      |     |    |
| Cele.WB235 | Cele.WB235_1:1755610                          | 1 | 1755610 | 1758756 | 3147 | 154 | 20 |
| CCACCAAAAA | CCACCAAAAAAGGTTTCTAGG                         |   |         |         |      |     |    |
| Cele.WB235 | Cele.WB235_1:1760846                          | 1 | 1760846 | 1762239 | 1394 | 64  | 20 |
| TTCTAGGCCA | TTCTAGGCCACCAAAAAGGT                          |   |         |         |      |     |    |
| Cele.WB235 | Cele.WB235_1:1796469                          | 1 | 1796469 | 1796919 | 451  | 9   | 43 |
| AAATCGGCAA | AAATCGGCAAACCGCAATTGCGGAAATTGGAAATTTCTGGC     |   |         |         |      |     |    |
| Cele.WB235 | Cele.WB235_1:1797802                          | 1 | 1797802 | 1798215 | 414  | 9   | 43 |
| GCCGGAATTG | GCCGGAATTGAAAATTTTCGGGCAAATCGGTAAGCCGGCCAATT  |   |         |         |      |     |    |
| Cele.WB235 | Cele.WB235_1:1807418                          | 1 | 1807418 | 1807780 | 363  | 11  | 26 |
| TTGCCGGTTT | TTGCTGGTTTTTGGGAATTATCGGCAC                   |   |         |         |      |     |    |
| Cele.WB235 | Cele.WB235_1:1814405                          | 1 | 1814405 | 1814778 | 374  | 9   | 35 |
| TTTGCCGGAA | TTTGCCGGAAATTTTCAAATCCGGCAATTTGCCGA           |   |         |         |      |     |    |
| Cele.WB235 | Cele.WB235_1:1815369                          | 1 | 1815369 | 1815789 | 421  | 18  | 19 |
| AAAATCAATA | AAAATCAATAAATCCTAAG                           |   |         |         |      |     |    |
| Cele.WB235 | Cele.WB235_1:1815369                          | 1 | 1815369 | 1817144 | 1776 | 44  | 19 |
| AAAATCAATA | AAAATCAATAAATCCTAAG                           |   |         |         |      |     |    |
| Cele.WB235 | Cele.WB235_1:1852477                          | 1 | 1852477 | 1852561 | 85   | 4   | 21 |
| CCTACTCTAG | CCTACTCTAGGCAGCCCTAG                          |   |         |         |      |     |    |
| Cele.WB235 | Cele.WB235_1:1852567                          | 1 | 1852567 | 1852667 | 101  | 5   | 20 |
| CTAGGCAGAC | CTAGGCAGACTTAGCCTACC                          |   |         |         |      |     |    |
| Cele.WB235 | Cele.WB235_1:1884484                          | 1 | 1884484 | 1884939 | 456  | 11  | 35 |
| AAATCGGCAA | AAATCGGCAAATTGGCGGAATTGAAAATCTCCGGC           |   |         |         |      |     |    |
| Cele.WB235 | Cele.WB235_1:1919828                          | 1 | 1919828 | 1922029 | 2202 | 58  | 35 |
| TTGCCGATTT | TTGCCGATTTGCCGAAATTTTCATTTTTCGCAAA            |   |         |         |      |     |    |
| Cele.WB235 | Cele.WB235_1:1935250                          | 1 | 1935250 | 1936853 | 1604 | 40  | 35 |
| GAAATTTTCA | GAAATTTTCAGTTTCGGCAAATTGCCGATTTGCCC           |   |         |         |      |     |    |
| Cele.WB235 | Cele.WB235_1:1935250                          | 1 | 1935250 | 1938219 | 2970 | 70  | 35 |
| GAAATTTTCA | GAAATTTTCAGTTTCGGCAAATTGCCGATTTGCCC           |   |         |         |      |     |    |
| Cele.WB235 | Cele.WB235_1:1946493                          | 1 | 1946493 | 1947006 | 514  | 5   | 35 |
| TTTGCCGGAA | TTTGCCGGAAATTTTCATTTTGGCAAAGTGCCGA            |   |         |         |      |     |    |
| Cele.WB235 | Cele.WB235_1:1949999                          | 1 | 1949999 | 1950277 | 279  | 8   | 35 |
| TTGCCGGAAA | TTGCCGGAAAGTATCAATTTCGGCTGATTGCCGAT           |   |         |         |      |     |    |
| Cele.WB235 | Cele.WB235_1:1987299                          | 1 | 1987299 | 1987635 | 337  | 5   | 38 |
| AAAATCGATA | AAAATCGATAATTTTCAGTATGCAGTGAAATTTCTTGA        |   |         |         |      |     |    |
| Cele.WB235 | Cele.WB235_1:2014890                          | 1 | 2014890 | 2015108 | 219  | 13  | 11 |
| TTTGCCGGAA | TTTTCGCCGAAC                                  |   |         |         |      |     |    |
| Cele.WB235 | Cele.WB235_1:2111857                          | 1 | 2111857 | 2112268 | 412  | 7   | 35 |
| CAAACCGGCA | CAAACCGGCATTTTGCCGGAAATTAACATTTAGAG           |   |         |         |      |     |    |
| Cele.WB235 | Cele.WB235_1:2139349                          | 1 | 2139349 | 2139629 | 281  | 8   | 35 |
| CGGCAAATTG | CGGCAAATTGCCGATTTGCCGGAACTTTCAATTC            |   |         |         |      |     |    |
| Cele.WB235 | Cele.WB235_1:2144021                          | 1 | 2144021 | 2144187 | 167  | 10  | 15 |
| AGATCTTGTT | AGATCATGTTTTCGG                               |   |         |         |      |     |    |
| Cele.WB235 | Cele.WB235_1:2165416                          | 1 | 2165416 | 2165854 | 439  | 10  | 35 |
| TTTGCCGGAA | TTTGCCGGAAATTTTCGGAATTCGACAGTTTGCCGG          |   |         |         |      |     |    |
| Cele.WB235 | Cele.WB235_1:2233376                          | 1 | 2233376 | 2233627 | 252  | 6   | 43 |
| CAAATCGGCA | CAAATCGGCAACTCGACAAATTTCCGAAATTAATAATTTCCAG   |   |         |         |      |     |    |
| Cele.WB235 | Cele.WB235_1:2251015                          | 1 | 2251015 | 2251148 | 134  | 4   | 33 |
| TAAGAAAAGT | TAAGAAAAGTTAGGCCACCAACATTTGGTGAC              |   |         |         |      |     |    |

|                                                                                                                                         |                                             |   |         |         |      |    |     |
|-----------------------------------------------------------------------------------------------------------------------------------------|---------------------------------------------|---|---------|---------|------|----|-----|
| Cele.WB235                                                                                                                              | Cele.WB235_1:2254186                        | 1 | 2254186 | 2255835 | 1650 | 87 | 12  |
| CACGCAACGC                                                                                                                              | CACGCAACGCTG                                |   |         |         |      |    |     |
| Cele.WB235                                                                                                                              | Cele.WB235_1:2263541                        | 1 | 2263541 | 2264092 | 552  | 13 | 43  |
| ATTTCGGCA                                                                                                                               | ATTTCGGCAAATGGGCAAGTCGGCAAATTGCCGAAATTAATA  |   |         |         |      |    |     |
| Cele.WB235                                                                                                                              | Cele.WB235_1:2269401                        | 1 | 2269401 | 2269479 | 79   | 6  | 12  |
| TAGGCTTAGG                                                                                                                              | TAGGCTTAGGCT                                |   |         |         |      |    |     |
| Cele.WB235                                                                                                                              | Cele.WB235_1:2276437                        | 1 | 2276437 | 2276626 | 190  | 5  | 12  |
| AGGCTTAGGC                                                                                                                              | AGGCTCAGGCTC                                |   |         |         |      |    |     |
| Cele.WB235                                                                                                                              | Cele.WB235_1:2333731                        | 1 | 2333731 | 2334442 | 712  | 8  | 20  |
| GGACTAGTTT                                                                                                                              | GGACTAGTTTTTGAGTAGAG                        |   |         |         |      |    |     |
| Cele.WB235                                                                                                                              | Cele.WB235_1:2333731                        | 1 | 2333731 | 2334603 | 873  | 11 | 20  |
| GGACTAGTTT                                                                                                                              | GGACTAGTTTTTGAGTAGAG                        |   |         |         |      |    |     |
| Cele.WB235                                                                                                                              | Cele.WB235_1:2364706                        | 1 | 2364706 | 2365240 | 535  | 20 | 20  |
| TTATTGATTT                                                                                                                              | TTATTAATTTTCTAGGACA                         |   |         |         |      |    |     |
| Cele.WB235                                                                                                                              | Cele.WB235_1:2370746                        | 1 | 2370746 | 2370842 | 97   | 6  | 12  |
| AAGCCTAAGC                                                                                                                              | AAGCCTAAGCCT                                |   |         |         |      |    |     |
| Cele.WB235                                                                                                                              | Cele.WB235_1:2430196                        | 1 | 2430196 | 2431177 | 982  | 5  | 175 |
| GATGCACCAT                                                                                                                              |                                             |   |         |         |      |    |     |
| GATGCACCATGTCTTTGAAAGCCTATACTTCGGTTCATTTCTAGCTGTCAAAAACCTTTTAAACAACACATCTATAGAAATCAACATGCTTAATATTTTCGTGAGTTGACAGTTTTTTTGATAACTGCAATGAAA |                                             |   |         |         |      |    |     |
| TCCGAGATATGAGCTTTCAAAGTTGAGAGACCTCACTCGGTT                                                                                              |                                             |   |         |         |      |    |     |
| Cele.WB235                                                                                                                              | Cele.WB235_1:2524693                        | 1 | 2524693 | 2524982 | 290  | 10 | 18  |
| GCCTAGGAAT                                                                                                                              | GACTAGGAATCCAATATG                          |   |         |         |      |    |     |
| Cele.WB235                                                                                                                              | Cele.WB235_1:2542918                        | 1 | 2542918 | 2543982 | 1065 | 56 | 19  |
| TGTTACACGA                                                                                                                              | TGTTACACGAAAAATAGAT                         |   |         |         |      |    |     |
| Cele.WB235                                                                                                                              | Cele.WB235_1:2557777                        | 1 | 2557777 | 2557986 | 210  | 6  | 35  |
| TTGCCGGAAT                                                                                                                              | TTGCCGGAATTAATAATTTCTGGAATTTGGCAAT          |   |         |         |      |    |     |
| Cele.WB235                                                                                                                              | Cele.WB235_1:2650538                        | 1 | 2650538 | 2650582 | 45   | 4  | 11  |
| AAACTTGGGC                                                                                                                              | AAACTTGGGCC                                 |   |         |         |      |    |     |
| Cele.WB235                                                                                                                              | Cele.WB235_1:2653859                        | 1 | 2653859 | 2654031 | 173  | 4  | 43  |
| TTGCCGATTT                                                                                                                              | TTGCCGATTTTCTGAATTGTTTCATTTCCGACAATATGACGAT |   |         |         |      |    |     |
| Cele.WB235                                                                                                                              | Cele.WB235_1:2738743                        | 1 | 2738743 | 2738953 | 211  | 6  | 35  |
| AATTTCAATT                                                                                                                              | AATTTCAATTCGGCAATTTGCGGATTTGCCGGAA          |   |         |         |      |    |     |
| Cele.WB235                                                                                                                              | Cele.WB235_1:2809445                        | 1 | 2809445 | 2809654 | 210  | 5  | 35  |
| GGAATTGAAA                                                                                                                              | GGAATTGAAAATTCGGGCAATTCGGCAAAATTGCC         |   |         |         |      |    |     |
| Cele.WB235                                                                                                                              | Cele.WB235_1:2817881                        | 1 | 2817881 | 2818157 | 277  | 5  | 43  |
| TTGCCGATTT                                                                                                                              | TTGCCGTTTTCTCGATTTGCGGATATTTACAATTTCACTATT  |   |         |         |      |    |     |
| Cele.WB235                                                                                                                              | Cele.WB235_1:2840215                        | 1 | 2840215 | 2840304 | 90   | 5  | 12  |
| TAGGCTTAGG                                                                                                                              | TAGGCTGAGGCG                                |   |         |         |      |    |     |
| Cele.WB235                                                                                                                              | Cele.WB235_1:2844921                        | 1 | 2844921 | 2845096 | 176  | 4  | 35  |
| TTTGCCGATT                                                                                                                              | TTTGCCGATTTGCCAAAAATTTTAATTCGGCAA           |   |         |         |      |    |     |
| Cele.WB235                                                                                                                              | Cele.WB235_1:2858185                        | 1 | 2858185 | 2858357 | 173  | 4  | 43  |
| AAATCGGCAA                                                                                                                              | AAATCGGCAATCCGGCAAATTCGGAATAATGAAAATTTCCGGC |   |         |         |      |    |     |
| Cele.WB235                                                                                                                              | Cele.WB235_1:3028822                        | 1 | 3028822 | 3029013 | 192  | 5  | 35  |
| TTGCCGAAA                                                                                                                               | TTGCCGAAATTTTCAATTCGGCAATTTGCCATT           |   |         |         |      |    |     |
| Cele.WB235                                                                                                                              | Cele.WB235_1:3114471                        | 1 | 3114471 | 3114865 | 395  | 8  | 35  |
| CGATTTGCCG                                                                                                                              | CGATTTGCCGAAATATTCATTTTCTGCAAAATTGC         |   |         |         |      |    |     |
| Cele.WB235                                                                                                                              | Cele.WB235_1:3115944                        | 1 | 3115944 | 3116232 | 289  | 21 | 12  |
| CTAAGCCTAA                                                                                                                              | CTATGCCTAAAC                                |   |         |         |      |    |     |
| Cele.WB235                                                                                                                              | Cele.WB235_1:3117070                        | 1 | 3117070 | 3117200 | 131  | 4  | 26  |
| GGCAGGCGTC                                                                                                                              | GGCAGGCGTCAAGCAGGCGGTTTTTA                  |   |         |         |      |    |     |
| Cele.WB235                                                                                                                              | Cele.WB235_1:3171655                        | 1 | 3171655 | 3172409 | 755  | 29 | 26  |
| CAGAGTCACT                                                                                                                              | CAGAGTCACTAAATTTGGTGAACGCG                  |   |         |         |      |    |     |

|                                                                                          |                                                                                                                                        |   |         |         |      |     |     |
|------------------------------------------------------------------------------------------|----------------------------------------------------------------------------------------------------------------------------------------|---|---------|---------|------|-----|-----|
| Cele.WB235                                                                               | Cele.WB235_1:3258597                                                                                                                   | 1 | 3258597 | 3259299 | 703  | 58  | 12  |
| CTAAGTCTAA                                                                               | CTAAGTCTAAGC                                                                                                                           |   |         |         |      |     |     |
| Cele.WB235                                                                               | Cele.WB235_1:3280164                                                                                                                   | 1 | 3280164 | 3280242 | 79   | 6   | 12  |
| AGGCTTAGGC                                                                               | AGGCTTAGGCTT                                                                                                                           |   |         |         |      |     |     |
| Cele.WB235                                                                               | Cele.WB235_1:3384983                                                                                                                   | 1 | 3384983 | 3385061 | 79   | 6   | 12  |
| GGCTTAGGCT                                                                               | GGCTTAGGCTTC                                                                                                                           |   |         |         |      |     |     |
| Cele.WB235                                                                               | Cele.WB235_1:3389969                                                                                                                   | 1 | 3389969 | 3393329 | 3361 | 224 | 15  |
| CTCACCACGA                                                                               | CTCGCCACGATGGGT                                                                                                                        |   |         |         |      |     |     |
| Cele.WB235                                                                               | Cele.WB235_1:3406451                                                                                                                   | 1 | 3406451 | 3406664 | 214  | 5   | 32  |
| AATTCAAATT                                                                               | AATTCAAATTGTCAAGAATAATTTAGGTGGAA                                                                                                       |   |         |         |      |     |     |
| Cele.WB235                                                                               | Cele.WB235_1:3424298                                                                                                                   | 1 | 3424298 | 3424548 | 251  | 6   | 43  |
| TTGAAAATTT                                                                               | TTGAAAATTTTCTAAAAATCGGCAAACCGGCAACTTGCCGGAA                                                                                            |   |         |         |      |     |     |
| Cele.WB235                                                                               | Cele.WB235_1:3427447                                                                                                                   | 1 | 3427447 | 3429127 | 1681 | 81  | 20  |
| GGCAGACCTA                                                                               | GGCAGACCTAGCCTACTCTA                                                                                                                   |   |         |         |      |     |     |
| Cele.WB235                                                                               | Cele.WB235_1:3442604                                                                                                                   | 1 | 3442604 | 3443969 | 1366 | 56  | 35  |
| TTTCGGCAAT                                                                               | TTTCGGCAATTTTCGGCAACTGCGGTATCGTGAAT                                                                                                    |   |         |         |      |     |     |
| Cele.WB235                                                                               | Cele.WB235_1:3459203                                                                                                                   | 1 | 3459203 | 3459616 | 414  | 8   | 35  |
| TCCGGCAAAT                                                                               | TCCGGCAAATCGGAAATCTGCCGGAAGTCAAAAAAT                                                                                                   |   |         |         |      |     |     |
| Cele.WB235                                                                               | Cele.WB235_1:3485156                                                                                                                   | 1 | 3485156 | 3487576 | 2421 | 121 | 20  |
| AAAAAATAGA                                                                               | AAAAAATAGATTGATATACC                                                                                                                   |   |         |         |      |     |     |
| Cele.WB235                                                                               | Cele.WB235_1:3553785                                                                                                                   | 1 | 3553785 | 3554055 | 271  | 6   | 45  |
| CTGAATCTTC                                                                               | CTGAATCTTCATCTCCAAAGGATCACAGGATCCTCCTTTATGAT                                                                                           |   |         |         |      |     |     |
| Cele.WB235                                                                               | Cele.WB235_1:3602994                                                                                                                   | 1 | 3602994 | 3603167 | 174  | 5   | 35  |
| TTTGCCGGAA                                                                               | TTTGCCGGAAATGTTCAATTCCGACAATTTGCCGG                                                                                                    |   |         |         |      |     |     |
| Cele.WB235                                                                               | Cele.WB235_1:3664200                                                                                                                   | 1 | 3664200 | 3666098 | 1899 | 73  | 26  |
| ATGGTTAGAG                                                                               | ATGGTTAGAGTCATAATTTTAGGTGA                                                                                                             |   |         |         |      |     |     |
| Cele.WB235                                                                               | Cele.WB235_1:3712691                                                                                                                   | 1 | 3712691 | 3712852 | 162  | 5   | 14  |
| TTTTGTAGA                                                                                | TTTTGTAGAACGTC                                                                                                                         |   |         |         |      |     |     |
| Cele.WB235                                                                               | Cele.WB235_1:3746094                                                                                                                   | 1 | 3746094 | 3746497 | 404  | 9   | 45  |
| TCTGATCCTT                                                                               | TCTGATCCTTCAGCTCCGAAGGATCACATGGGTACCTTCTGATGT                                                                                          |   |         |         |      |     |     |
| Cele.WB235                                                                               | Cele.WB235_1:3746917                                                                                                                   | 1 | 3746917 | 3747230 | 314  | 7   | 45  |
| CTGAAGGATC                                                                               | CTGAAGGATCAGAACATCAGAAGGTGCCATGTGATCCTTCGGAG                                                                                           |   |         |         |      |     |     |
| Cele.WB235                                                                               | Cele.WB235_1:3763157                                                                                                                   | 1 | 3763157 | 3765957 | 2801 | 112 | 25  |
| TTTACTCTCT                                                                               | TTTACTCTCTGGCTTCACAGAATAT                                                                                                              |   |         |         |      |     |     |
| Cele.WB235                                                                               | Cele.WB235_1:3835938                                                                                                                   | 1 | 3835938 | 3837024 | 1087 | 26  | 34  |
| TGCCGGAATT                                                                               | TGTCGGAATTGAAATTTCCAGCAAATCGGCAAAT                                                                                                     |   |         |         |      |     |     |
| Cele.WB235                                                                               | Cele.WB235_1:3980324                                                                                                                   | 1 | 3980324 | 3980429 | 106  | 7   | 15  |
| TCGTGGTGAG                                                                               | TCGTGGTGAGACCTT                                                                                                                        |   |         |         |      |     |     |
| Cele.WB235                                                                               | Cele.WB235_1:3980821                                                                                                                   | 1 | 3980821 | 3981021 | 201  | 6   | 40  |
| TTTCTAGAAA                                                                               | TTTCTAGAAAATTCGAGAAAATTCGGAATGGTCCAGAAT                                                                                                |   |         |         |      |     |     |
| Cele.WB235                                                                               | Cele.WB235_1:3990050                                                                                                                   | 1 | 3990050 | 3990699 | 650  | 11  | 59  |
| AAAACCAAGT                                                                               | AAAACCAAGTGACATTTGAAATTTCCCAATTTCCACAGTTTTTCAGTTTAAAAAATTTG                                                                            |   |         |         |      |     |     |
| Cele.WB235                                                                               | Cele.WB235_1:4118875                                                                                                                   | 1 | 4118875 | 4120034 | 1160 | 5   | 223 |
| TTTCAGAATT                                                                               | TTTCAGAATTTAAAAACGGCATTCCAAAAACTTTCACAACCGCCAAGCTCAAGCAAAAAAAGTAAACTTCAGTCATACCTTTCAGAGCAAACCTTTGAAATTGAATGAAATAGACCATTTATTTGCAAAATTAG |   |         |         |      |     |     |
| TAGATTTTCCAATTTTAAAAATTAATATCTGGCTTCTAAATAACTTTTTTGAAAATCCCCGTAGCCATTTTGTGCAAAATTTGTGCTC |                                                                                                                                        |   |         |         |      |     |     |
| Cele.WB235                                                                               | Cele.WB235_1:4167811                                                                                                                   | 1 | 4167811 | 4168323 | 513  | 13  | 39  |
| TATTTTAAAT                                                                               | TATTTTAAATTTGGCCTACTTAAAAAGTAGGTTCATGACT                                                                                               |   |         |         |      |     |     |
| Cele.WB235                                                                               | Cele.WB235_1:4185588                                                                                                                   | 1 | 4185588 | 4185648 | 61   | 4   | 15  |
| TTTCCGGATC                                                                               | TTTCCGGATCTACGT                                                                                                                        |   |         |         |      |     |     |
| Cele.WB235                                                                               | Cele.WB235_1:4185829                                                                                                                   | 1 | 4185829 | 4185964 | 136  | 9   | 15  |
| AGATCCGGAA                                                                               | AGATCCGGAAAACGT                                                                                                                        |   |         |         |      |     |     |

|                                                                                                                                       |                                                                                                |   |         |         |       |     |     |
|---------------------------------------------------------------------------------------------------------------------------------------|------------------------------------------------------------------------------------------------|---|---------|---------|-------|-----|-----|
| Cele.WB235                                                                                                                            | Cele.WB235_1:4280022                                                                           | 1 | 4280022 | 4281181 | 1160  | 6   | 226 |
| ACAAGAAGCT                                                                                                                            |                                                                                                |   |         |         |       |     |     |
| ACAAGAAGCTTCACGTAGTTACAGAAATAGTAGATTTTTAGCCCTACCTTTTAGAGCGTATTTTATTATTTAATGAAAAC                                                      |                                                                                                |   |         |         |       |     |     |
| CTCTTCAAAGTAATTTTTTTGCGAAATGTCTTTCAGAACTTTGTAGTAAATTTTAAGCTCTTTTAGAATATATTAACAATATTCAGTAGGT                                           |                                                                                                |   |         |         |       |     |     |
| Cele.WB235                                                                                                                            | Cele.WB235_1:4281487                                                                           | 1 | 4281487 | 4294537 | 13051 | 107 | 94  |
| TCAAAATCTT                                                                                                                            | TCAAAATCTTCTGTTCTCTAAATATTGGGTGCTTTTCAATGCTCTTTGTAGACAAATCAATGGGAAAATGATCAATTTCTGGAGGCAGTAAATC |   |         |         |       |     |     |
| Cele.WB235                                                                                                                            | Cele.WB235_1:4338841                                                                           | 1 | 4338841 | 4339537 | 697   | 4   | 174 |
| CTTCAAGAGC                                                                                                                            |                                                                                                |   |         |         |       |     |     |
| CTTCAAGAGCTCAGTGTTATTTCTGACATGCCAATCTCGACTCTCGACTTGAACATGTTACAAGGAATCGAAGACAACTTAAACAGCCTCCCAGCTGAAGAATCTGATGAGATCCGAGAGAAGTTAAATGAAC |                                                                                                |   |         |         |       |     |     |
| TGAGAAGAAGAAAGCAAGAAAGTGACCAAGCTGAAGCTCTA                                                                                             |                                                                                                |   |         |         |       |     |     |
| Cele.WB235                                                                                                                            | Cele.WB235_1:4465416                                                                           | 1 | 4465416 | 4465569 | 154   | 8   | 19  |
| TTTTTCGTGT                                                                                                                            | TTTTTCGTGTAAACAATCTA                                                                           |   |         |         |       |     |     |
| Cele.WB235                                                                                                                            | Cele.WB235_1:4540371                                                                           | 1 | 4540371 | 4544820 | 4450  | 169 | 26  |
| AAATCCGCCG                                                                                                                            | AAATCCGCCGCAGTGCCATTTTTCTG                                                                     |   |         |         |       |     |     |
| Cele.WB235                                                                                                                            | Cele.WB235_1:4544868                                                                           | 1 | 4544868 | 4547696 | 2829  | 104 | 27  |
| ACTCTCTGTG                                                                                                                            | ACTCTCTGTGGCTTCACCGATTATTTT                                                                    |   |         |         |       |     |     |
| Cele.WB235                                                                                                                            | Cele.WB235_1:4548525                                                                           | 1 | 4548525 | 4548705 | 181   | 14  | 12  |
| TTTTTATTTT                                                                                                                            | TTTTTATTTTTTA                                                                                  |   |         |         |       |     |     |
| Cele.WB235                                                                                                                            | Cele.WB235_1:4573284                                                                           | 1 | 4573284 | 4573803 | 520   | 13  | 40  |
| CATTCCAGAA                                                                                                                            | CATTCCAGAAATTTTCTCGATTTTCTAGAAAGTTCTGGAA                                                       |   |         |         |       |     |     |
| Cele.WB235                                                                                                                            | Cele.WB235_1:4574052                                                                           | 1 | 4574052 | 4574607 | 556   | 34  | 15  |
| GGGTCTCACC                                                                                                                            | GGGTCTCACCACGAC                                                                                |   |         |         |       |     |     |
| Cele.WB235                                                                                                                            | Cele.WB235_1:4958855                                                                           | 1 | 4958855 | 4958932 | 78    | 5   | 15  |
| CGAAAAGGGG                                                                                                                            | CGAAAAGGGGATCTG                                                                                |   |         |         |       |     |     |
| Cele.WB235                                                                                                                            | Cele.WB235_1:4959104                                                                           | 1 | 4959104 | 4959196 | 93    | 5   | 15  |
| CTCCCCTTTT                                                                                                                            | CTCCCCTTTTTCGTAT                                                                               |   |         |         |       |     |     |
| Cele.WB235                                                                                                                            | Cele.WB235_1:4961695                                                                           | 1 | 4961695 | 4961802 | 108   | 6   | 15  |
| CTCCCCTTTT                                                                                                                            | CTCCCCTTTTTCGTAT                                                                               |   |         |         |       |     |     |
| Cele.WB235                                                                                                                            | Cele.WB235_1:5144853                                                                           | 1 | 5144853 | 5145677 | 825   | 51  | 15  |
| CGTGGTGAGA                                                                                                                            | CGTGGTGAGACCTTT                                                                                |   |         |         |       |     |     |
| Cele.WB235                                                                                                                            | Cele.WB235_1:5152583                                                                           | 1 | 5152583 | 5153888 | 1306  | 45  | 29  |
| AAGGATTTC                                                                                                                             | AAGGATTTCCTTATGTCAATACATTGT                                                                    |   |         |         |       |     |     |
| Cele.WB235                                                                                                                            | Cele.WB235_1:5176308                                                                           | 1 | 5176308 | 5176383 | 76    | 5   | 15  |
| TCCCCTTTTC                                                                                                                            | TCCCCTTTTTCGTGC                                                                                |   |         |         |       |     |     |
| Cele.WB235                                                                                                                            | Cele.WB235_1:5563061                                                                           | 1 | 5563061 | 5563217 | 157   | 13  | 12  |
| GAAATTTTTT                                                                                                                            | GAAATTTTTTTCC                                                                                  |   |         |         |       |     |     |
| Cele.WB235                                                                                                                            | Cele.WB235_1:5621701                                                                           | 1 | 5621701 | 5621793 | 93    | 6   | 15  |
| TCCCCTTTTC                                                                                                                            | TCCCCTTTTTCGTGC                                                                                |   |         |         |       |     |     |
| Cele.WB235                                                                                                                            | Cele.WB235_1:5640355                                                                           | 1 | 5640355 | 5640950 | 596   | 5   | 119 |
| GCCACCTTTA                                                                                                                            |                                                                                                |   |         |         |       |     |     |
| GCCACCTTTAACCCTAATCCAAGCAGAGCAGGCCGTAGGCCTGCTAGGCGGTAGCGACACGCTCAAGCCCAACAGTCCGGGATGAGGGTTCGAGGCCCTCTTACTCTTAGAACTTTAG                |                                                                                                |   |         |         |       |     |     |
| Cele.WB235                                                                                                                            | Cele.WB235_1:5975024                                                                           | 1 | 5975024 | 5975828 | 805   | 18  | 45  |
| TCTGATCCTT                                                                                                                            | TCTGATCCTTCAGCTCCGAAGGATCAGATGGGTACCTTCTGATGT                                                  |   |         |         |       |     |     |
| Cele.WB235                                                                                                                            | Cele.WB235_1:5977228                                                                           | 1 | 5977228 | 5977451 | 224   | 5   | 45  |
| AAGGATCAGA                                                                                                                            | AAGGATCAGACCATCAGGAGGTACCCTTACGATCCTTCTTATCTG                                                  |   |         |         |       |     |     |
| Cele.WB235                                                                                                                            | Cele.WB235_1:6089071                                                                           | 1 | 6089071 | 6089158 | 88    | 5   | 17  |
| AGGTAGTCAA                                                                                                                            | AGGTAGTCAATGAGCAA                                                                              |   |         |         |       |     |     |
| Cele.WB235                                                                                                                            | Cele.WB235_1:6514283                                                                           | 1 | 6514283 | 6515118 | 836   | 13  | 30  |
| TGGTGGAAC                                                                                                                             | TGGTGGAAC                                                                                      |   |         |         |       |     |     |
| Cele.WB235                                                                                                                            | Cele.WB235_1:6647571                                                                           | 1 | 6647571 | 6647736 | 166   | 11  | 15  |
| GAGACCCATC                                                                                                                            | GAGACCCACCGTGGT                                                                                |   |         |         |       |     |     |

|                                                                                                    |                                                                                                                                     |   |          |          |       |     |     |
|----------------------------------------------------------------------------------------------------|-------------------------------------------------------------------------------------------------------------------------------------|---|----------|----------|-------|-----|-----|
| Cele.WB235                                                                                         | Cele.WB235_1:6647885                                                                                                                | 1 | 6647885  | 6648325  | 441   | 11  | 40  |
| TTCTGGAATG                                                                                         | TTCTGGAATGTTCAGAACTTTCTAGAAAAATCGAGAAAA                                                                                             |   |          |          |       |     |     |
| Cele.WB235                                                                                         | Cele.WB235_1:6771968                                                                                                                | 1 | 6771968  | 6773943  | 1976  | 79  | 25  |
| GTGAAGCCAG                                                                                         | GTGAAGCCAGAGAGTAAAAATATACT                                                                                                          |   |          |          |       |     |     |
| Cele.WB235                                                                                         | Cele.WB235_1:6854524                                                                                                                | 1 | 6854524  | 6854599  | 76    | 5   | 15  |
| AGATCCGGAA                                                                                         | AGATCCGGAAAAACGT                                                                                                                    |   |          |          |       |     |     |
| Cele.WB235                                                                                         | Cele.WB235_1:7003581                                                                                                                | 1 | 7003581  | 7003641  | 61    | 4   | 15  |
| CGAAAAGGGG                                                                                         | CGAAAAGGGGATCAG                                                                                                                     |   |          |          |       |     |     |
| Cele.WB235                                                                                         | Cele.WB235_1:7740676                                                                                                                | 1 | 7740676  | 7740751  | 76    | 5   | 15  |
| TCGTGGTGAG                                                                                         | TCGTGGTGAGACCCA                                                                                                                     |   |          |          |       |     |     |
| Cele.WB235                                                                                         | Cele.WB235_1:7740774                                                                                                                | 1 | 7740774  | 7741690  | 917   | 26  | 35  |
| GCGGGAAATT                                                                                         | GCGGGAAATTCAAATTTTAAGGGAAAAAATTTTTG                                                                                                 |   |          |          |       |     |     |
| Cele.WB235                                                                                         | Cele.WB235_1:7741780                                                                                                                | 1 | 7741780  | 7742262  | 483   | 13  | 40  |
| TTTCTAGAAA                                                                                         | TTTCTAGAAAATTCGGGAAAACCTCTGGAATATTCAGAAC                                                                                            |   |          |          |       |     |     |
| Cele.WB235                                                                                         | Cele.WB235_1:7780058                                                                                                                | 1 | 7780058  | 7780728  | 671   | 39  | 16  |
| AATTTTTCGG                                                                                         | AATTTTTCAGCAGCAA                                                                                                                    |   |          |          |       |     |     |
| Cele.WB235                                                                                         | Cele.WB235_1:7868293                                                                                                                | 1 | 7868293  | 7868548  | 256   | 17  | 15  |
| ACCCATCGTG                                                                                         | ACCCATCGTGGCGAA                                                                                                                     |   |          |          |       |     |     |
| Cele.WB235                                                                                         | Cele.WB235_1:7868653                                                                                                                | 1 | 7868653  | 7868828  | 176   | 5   | 35  |
| GGGAAATTTA                                                                                         | GGGAAATTTAAATTTTCTGTGAAAAATATTTTGGC                                                                                                 |   |          |          |       |     |     |
| Cele.WB235                                                                                         | Cele.WB235_1:7868937                                                                                                                | 1 | 7868937  | 7869457  | 521   | 13  | 40  |
| GAATGTTCCA                                                                                         | GAATGTTCCAGAACTTTCTAGAAAAATCGAGAAAATTTCTG                                                                                           |   |          |          |       |     |     |
| Cele.WB235                                                                                         | Cele.WB235_1:8484982                                                                                                                | 1 | 8484982  | 8485111  | 130   | 4   | 32  |
| AAAATCGAAA                                                                                         | AAAATCGAAAAATTCTCGTTTTTCAATTTTTTA                                                                                                   |   |          |          |       |     |     |
| Cele.WB235                                                                                         | Cele.WB235_1:9636862                                                                                                                | 1 | 9636862  | 9637728  | 867   | 20  | 44  |
| CTGTTTTCTG                                                                                         | CTGTTTTCTGAGCATTGTAGATTTTCGGATTGATGGCCGAAAGG                                                                                        |   |          |          |       |     |     |
| Cele.WB235                                                                                         | Cele.WB235_1:9819851                                                                                                                | 1 | 9819851  | 9820331  | 481   | 31  | 15  |
| CACGATGGGT                                                                                         | CACGATGGGTCTCAC                                                                                                                     |   |          |          |       |     |     |
| Cele.WB235                                                                                         | Cele.WB235_1:9821430                                                                                                                | 1 | 9821430  | 9822959  | 1530  | 23  | 66  |
| AATCAACCTA                                                                                         | AATCAACCTATTCAAGTTGACAATGGTTTTCTTTTATCAAATTTTTTAAATTTTAAAGAAAACACA                                                                  |   |          |          |       |     |     |
| Cele.WB235                                                                                         | Cele.WB235_1:9925221                                                                                                                | 1 | 9925221  | 9925359  | 139   | 5   | 37  |
| ATAATTTTTC                                                                                         | ATAATTTTCTTGAGTAATGAGAGACTTTTTCATAAT                                                                                                |   |          |          |       |     |     |
| Cele.WB235                                                                                         | Cele.WB235_1:10130602                                                                                                               | 1 | 10130602 | 10133102 | 2501  | 100 | 25  |
| TATTTACTCT                                                                                         | TATTTACTCTAATTTTCTGCCAATT                                                                                                           |   |          |          |       |     |     |
| Cele.WB235                                                                                         | Cele.WB235_1:10204129                                                                                                               | 1 | 10204129 | 10219199 | 15071 | 148 | 68  |
| ACTGAATAGG                                                                                         | ACTGAATAGGTTGATTTGTGTTTTCTTCTGAAATCTAAGAATTTTGGTAAAAGAAAACCATTGTCA                                                                  |   |          |          |       |     |     |
| Cele.WB235                                                                                         | Cele.WB235_1:10266294                                                                                                               | 1 | 10266294 | 10276924 | 10631 | 44  | 231 |
| GCTGAATTCA                                                                                         |                                                                                                                                     |   |          |          |       |     |     |
| GCTGAATTCA                                                                                         | GCTGAATTCACTGGGTAGGATGTGACTTCATGGCTGAGGGGAACATCTTGAACATCATCAGCACGATGTGTAGTGTGAGTGGTCCATCGTATTGATCAGAAATCGGGTAATCAGAATGAGCAGAAGACTTC |   |          |          |       |     |     |
| TTGAACAATCCAGTAATCTTCAATTTCAATGATGGCTCGTCCTTCTTCTCCGATTCTCAATCACAACCTGGGATGACATACTCTGGCAGCTTCTCATA |                                                                                                                                     |   |          |          |       |     |     |
| Cele.WB235                                                                                         | Cele.WB235_1:10291633                                                                                                               | 1 | 10291633 | 10291724 | 92    | 6   | 14  |
| GCTATACGCT                                                                                         | GCTATACGCTATAC                                                                                                                      |   |          |          |       |     |     |
| Cele.WB235                                                                                         | Cele.WB235_1:10404549                                                                                                               | 1 | 10404549 | 10404632 | 84    | 6   | 12  |
| TAGGCTTAGG                                                                                         | TAGGCTTAGTCT                                                                                                                        |   |          |          |       |     |     |
| Cele.WB235                                                                                         | Cele.WB235_1:10468958                                                                                                               | 1 | 10468958 | 10469050 | 93    | 6   | 15  |
| CGAAAAGGGG                                                                                         | CGAAAAGGGGATCTG                                                                                                                     |   |          |          |       |     |     |
| Cele.WB235                                                                                         | Cele.WB235_1:10469225                                                                                                               | 1 | 10469225 | 10469317 | 93    | 6   | 15  |
| TCCCCTTTTC                                                                                         | TCCCCTTTTCGTATC                                                                                                                     |   |          |          |       |     |     |
| Cele.WB235                                                                                         | Cele.WB235_1:10650908                                                                                                               | 1 | 10650908 | 10650980 | 73    | 4   | 18  |
| AAAAGTTACA                                                                                         | AAAAGTTACAGTGTCTT                                                                                                                   |   |          |          |       |     |     |
| Cele.WB235                                                                                         | Cele.WB235_1:10851626                                                                                                               | 1 | 10851626 | 10855375 | 3750  | 23  | 163 |
| GCATAGTCAA                                                                                         |                                                                                                                                     |   |          |          |       |     |     |



GCATAGTCAAAAATACAAGAATATGCCTATCAAATTATAATAGTTTGTACGGAAGTATTTTTTAAAACTTGATAAAAAATATATAAAAGCTGATTTTTTAAAAAATTCAAAGTATGGGAAAATCATATGGAA  
TCATTCTTTTTTATCTCAAAAACTGTTCA

|             |                                                                                               |   |          |          |      |     |    |
|-------------|-----------------------------------------------------------------------------------------------|---|----------|----------|------|-----|----|
| Cele.WB235  | Cele.WB235_1:10913365                                                                         | 1 | 10913365 | 10914502 | 1138 | 5   | 94 |
| TGTAGACAAA  | TGTAGACAAATCAATGGGAGAATCATCAATTTCTGAAGGCAGTAATTCTCAAATCTTCTGTTCTCTAAATATTGGGTGCTTTTCGATGTCCTT |   |          |          |      |     |    |
| Cele.WB235  | Cele.WB235_1:10945938                                                                         | 1 | 10945938 | 10952999 | 7062 | 238 | 32 |
| GCACCAAATA  | GCACCAAATATACCAATTTAGCACCGATAGA                                                               |   |          |          |      |     |    |
| Cele.WB235  | Cele.WB235_1:10953026                                                                         | 1 | 10953026 | 10953491 | 466  | 4   | 26 |
| TTTTTGAAAA  | TTTTTGAAAAATGGCATTGCGGCGGA                                                                    |   |          |          |      |     |    |
| Cele.WB235  | Cele.WB235_1:10977031                                                                         | 1 | 10977031 | 10977503 | 473  | 10  | 35 |
| TTGCCGATTT  | TTACCGATTTGCGGAATTTTCAATCCGGCAAT                                                              |   |          |          |      |     |    |
| Cele.WB235  | Cele.WB235_1:10993314                                                                         | 1 | 10993314 | 10993636 | 323  | 8   | 35 |
| GCCGGAATTG  | GCCGGAATCGAAATTTTCCGGCAAATCTACAAACT                                                           |   |          |          |      |     |    |
| Cele.WB235  | Cele.WB235_1:11032650                                                                         | 1 | 11032650 | 11032782 | 133  | 12  | 11 |
| TATGCCTAGC  | TATGCCTAGCC                                                                                   |   |          |          |      |     |    |
| Cele.WB235  | Cele.WB235_1:11060982                                                                         | 1 | 11060982 | 11061207 | 226  | 15  | 15 |
| CGATGCTCCA  | CGATGCTCCACCCGG                                                                               |   |          |          |      |     |    |
| Cele.WB235  | Cele.WB235_1:11061949                                                                         | 1 | 11061949 | 11062380 | 432  | 11  | 34 |
| TTCCGGCAAA  | TTCCGGCAAATCGGAAAATTGCCGGATATTAAAT                                                            |   |          |          |      |     |    |
| Cele.WB235  | Cele.WB235_1:11069544                                                                         | 1 | 11069544 | 11069616 | 73   | 6   | 12 |
| CGATCTCCAC  | CGATCTCCACCT                                                                                  |   |          |          |      |     |    |
| Cele.WB235  | Cele.WB235_1:11084941                                                                         | 1 | 11084941 | 11085053 | 113  | 7   | 14 |
| AGCTTGAAGC  | AGCTTGAAGCTTGG                                                                                |   |          |          |      |     |    |
| Cele.WB235  | Cele.WB235_1:11113480                                                                         | 1 | 11113480 | 11113648 | 169  | 4   | 42 |
| TGCCGGAAAT  | TGCCGGAAATTTCAAACCCGGTAGTTTGGCCATTGCGCGAGC                                                    |   |          |          |      |     |    |
| Cele.WB235  | Cele.WB235_1:11144860                                                                         | 1 | 11144860 | 11145055 | 196  | 13  | 15 |
| TCGTGGTGAG  | TCGTGGTGAGACCCA                                                                               |   |          |          |      |     |    |
| Cele.WB235  | Cele.WB235_1:11145522                                                                         | 1 | 11145522 | 11145582 | 61   | 5   | 12 |
| TATACATATA  | TATACATATA                                                                                    |   |          |          |      |     |    |
| Cele.WB235  | Cele.WB235_1:11155001                                                                         | 1 | 11155001 | 11155099 | 99   | 7   | 14 |
| AACTACTAAC  | AACTACTAACTACT                                                                                |   |          |          |      |     |    |
| Cele.WB235  | Cele.WB235_1:11186372                                                                         | 1 | 11186372 | 11187503 | 1132 | 15  | 35 |
| TTCCGGCAAA  | TTCCGGCAAATCGGCAAATTGCCGGGACTGAAAAAT                                                          |   |          |          |      |     |    |
| Cele.WB235  | Cele.WB235_1:11190690                                                                         | 1 | 11190690 | 11191449 | 760  | 4   | 35 |
| TCGGCAAATT  | TCGGCAAATTACGGAAAAATGAAAATTTCCGGCAAA                                                          |   |          |          |      |     |    |
| Cele.WB235  | Cele.WB235_1:11201002                                                                         | 1 | 11201002 | 11201638 | 637  | 9   | 35 |
| AATTGCCGAA  | AATTGCCAAATTTCTCGTTTTTGGCAATTTTCAAA                                                           |   |          |          |      |     |    |
| Cele.WB235  | Cele.WB235_1:11253589                                                                         | 1 | 11253589 | 11254333 | 745  | 60  | 12 |
| CGTTGCGTGT  | CGTTGCGATGTCG                                                                                 |   |          |          |      |     |    |
| Cele.WB235  | Cele.WB235_1:11273722                                                                         | 1 | 11273722 | 11273834 | 113  | 7   | 16 |
| CTACATGCCT  | CTACATGCCTATATGC                                                                              |   |          |          |      |     |    |
| Cele.WB235  | Cele.WB235_1:11273722                                                                         | 1 | 11273722 | 11274842 | 1121 | 68  | 16 |
| CTACATGCCT  | CTACATGCCTATATGC                                                                              |   |          |          |      |     |    |
| Cele.WB235  | Cele.WB235_1:11312599                                                                         | 1 | 11312599 | 11313143 | 545  | 18  | 26 |
| ACCTACAGTA  | ATCTACAGTACCCCTATTCTAGAGTG                                                                    |   |          |          |      |     |    |
| Cele.WB235  | Cele.WB235_1:11313617                                                                         | 1 | 11313617 | 11315164 | 1548 | 48  | 32 |
| GCAATTTTTTA | GCAATTTTTAGGCTAAAAATCACTAAAAAACT                                                              |   |          |          |      |     |    |
| Cele.WB235  | Cele.WB235_1:11342672                                                                         | 1 | 11342672 | 11342750 | 79   | 6   | 12 |
| TATATGTATA  | TATATGTATATG                                                                                  |   |          |          |      |     |    |
| Cele.WB235  | Cele.WB235_1:11349013                                                                         | 1 | 11349013 | 11350796 | 1784 | 47  | 35 |
| GGCAAATCAG  | GGCAAATCAGCAAATTGCCGGAATTGAAAATTTCC                                                           |   |          |          |      |     |    |
| Cele.WB235  | Cele.WB235_1:11357272                                                                         | 1 | 11357272 | 11357373 | 102  | 5   | 20 |
| AATAGATTGT  | AATAGATTGTTACACGAAAG                                                                          |   |          |          |      |     |    |

|            |                                              |   |          |          |      |    |    |
|------------|----------------------------------------------|---|----------|----------|------|----|----|
| Cele.WB235 | Cele.WB235_1:11383715                        | 1 | 11383715 | 11384049 | 335  | 14 | 20 |
| AAAAATCAAT | AAAAATCAATAATTTTCATCG                        |   |          |          |      |    |    |
| Cele.WB235 | Cele.WB235_1:11384374                        | 1 | 11384374 | 11386353 | 1980 | 95 | 20 |
| ATTGATTTTT | ATTGATTTTTTGAGAAAAAT                         |   |          |          |      |    |    |
| Cele.WB235 | Cele.WB235_1:11404108                        | 1 | 11404108 | 11404462 | 355  | 10 | 30 |
| CCTTGGGCTC | CCTTGGGCTCCCTGAGCTCCAAATTGTGTT               |   |          |          |      |    |    |
| Cele.WB235 | Cele.WB235_1:11420316                        | 1 | 11420316 | 11421039 | 724  | 15 | 11 |
| GTACTGTAGG | GTACTGTAGTG                                  |   |          |          |      |    |    |
| Cele.WB235 | Cele.WB235_1:11425096                        | 1 | 11425096 | 11425445 | 350  | 9  | 35 |
| ATTCCGGCAA | ATTCCGGCAATTTGCCGATTTTCCAGAAATTTTCA          |   |          |          |      |    |    |
| Cele.WB235 | Cele.WB235_1:11432554                        | 1 | 11432554 | 11432811 | 258  | 6  | 34 |
| ATGCACCATG | ATGCACCATGCCAAAAATATATCCAAACCCCG             |   |          |          |      |    |    |
| Cele.WB235 | Cele.WB235_1:11450427                        | 1 | 11450427 | 11450505 | 79   | 6  | 12 |
| AAGCCTAAGC | AAGCCTAAGCCT                                 |   |          |          |      |    |    |
| Cele.WB235 | Cele.WB235_1:11451202                        | 1 | 11451202 | 11451316 | 115  | 9  | 12 |
| GCTTAGGCTT | GCTTAGGCTTAG                                 |   |          |          |      |    |    |
| Cele.WB235 | Cele.WB235_1:11455940                        | 1 | 11455940 | 11456197 | 258  | 6  | 34 |
| ATGCACCATG | ATGCACCATGCCAAAAATATATCCAAACCCCG             |   |          |          |      |    |    |
| Cele.WB235 | Cele.WB235_1:11470915                        | 1 | 11470915 | 11470999 | 85   | 7  | 12 |
| GGCTTAGGCT | GGCTTAGGCTTA                                 |   |          |          |      |    |    |
| Cele.WB235 | Cele.WB235_1:11474410                        | 1 | 11474410 | 11474625 | 216  | 5  | 43 |
| CGGCAAATCG | CGGCAAATCGGCAAATCGGCAACTTGCCGGAATTGAAAATTTTC |   |          |          |      |    |    |
| Cele.WB235 | Cele.WB235_1:11480157                        | 1 | 11480157 | 11480277 | 121  | 8  | 15 |
| TCGTGGTGAG | TCGTGGTGAGACCCA                              |   |          |          |      |    |    |
| Cele.WB235 | Cele.WB235_1:11480313                        | 1 | 11480313 | 11481528 | 1216 | 24 | 35 |
| TGGCGGGAAA | TGGCGGGAAATTCAAATTTTCAGTGAAAAAATTTT          |   |          |          |      |    |    |
| Cele.WB235 | Cele.WB235_1:11484951                        | 1 | 11484951 | 11485029 | 79   | 6  | 12 |
| TAGGTCTAGG | TAGGTCTAGGTC                                 |   |          |          |      |    |    |
| Cele.WB235 | Cele.WB235_1:11485772                        | 1 | 11485772 | 11485879 | 108  | 5  | 19 |
| TCAAAAATCA | TCAAAAATCAATAATTTCA                          |   |          |          |      |    |    |
| Cele.WB235 | Cele.WB235_1:11486089                        | 1 | 11486089 | 11486222 | 134  | 7  | 19 |
| TTATCGATTT | TTATCGATTTTCCGGAAA                           |   |          |          |      |    |    |
| Cele.WB235 | Cele.WB235_1:11485735                        | 1 | 11485735 | 11486997 | 1263 | 20 | 19 |
| AAAAATCGAT | AAAAATCAATAATTTTCATC                         |   |          |          |      |    |    |
| Cele.WB235 | Cele.WB235_1:11532642                        | 1 | 11532642 | 11533117 | 476  | 17 | 19 |
| TTTCACAAAA | TTTCACAAAAATCGATAAT                          |   |          |          |      |    |    |
| Cele.WB235 | Cele.WB235_1:11531919                        | 1 | 11531919 | 11534041 | 2123 | 45 | 19 |
| AAAATCGATA | AAAATCGATAATTTCTCAT                          |   |          |          |      |    |    |
| Cele.WB235 | Cele.WB235_1:11540263                        | 1 | 11540263 | 11540521 | 259  | 16 | 12 |
| AAGCCAAAGC | AAGCCAAAGAAT                                 |   |          |          |      |    |    |
| Cele.WB235 | Cele.WB235_1:11655695                        | 1 | 11655695 | 11656421 | 727  | 60 | 12 |
| AGGCTCAGGC | AGGGTCAGGCTC                                 |   |          |          |      |    |    |
| Cele.WB235 | Cele.WB235_1:11656920                        | 1 | 11656920 | 11657791 | 872  | 54 | 16 |
| GCATGTAGGC | GCATGTAGGCATGTAG                             |   |          |          |      |    |    |
| Cele.WB235 | Cele.WB235_1:11694858                        | 1 | 11694858 | 11694997 | 140  | 13 | 11 |
| TTTGCACAT  | TTTTCCACATT                                  |   |          |          |      |    |    |
| Cele.WB235 | Cele.WB235_1:11763187                        | 1 | 11763187 | 11763333 | 147  | 6  | 11 |
| AGTACTGTAG | AGTACTGTAGG                                  |   |          |          |      |    |    |
| Cele.WB235 | Cele.WB235_1:11829562                        | 1 | 11829562 | 11829989 | 428  | 5  | 42 |
| TCGGCAAATC | TCGGCAAATCGGCTATTCCTGGTTTTTCAAAATTTGCCGAGC   |   |          |          |      |    |    |
| Cele.WB235 | Cele.WB235_1:11840154                        | 1 | 11840154 | 11840231 | 78   | 7  | 11 |
| CAAAAAATGT | CAAAAAATGTC                                  |   |          |          |      |    |    |

|             |                                                                           |   |          |          |     |    |    |
|-------------|---------------------------------------------------------------------------|---|----------|----------|-----|----|----|
| Cele.WB235  | Cele.WB235_1:11933362                                                     | 1 | 11933362 | 11933554 | 193 | 15 | 12 |
| TTAGGCTTAG  | TTACGCTTAGGC                                                              |   |          |          |     |    |    |
| Cele.WB235  | Cele.WB235_1:11984232                                                     | 1 | 11984232 | 11984346 | 115 | 7  | 12 |
| CTAAGCCTAA  | CGAAGCCTAAGC                                                              |   |          |          |     |    |    |
| Cele.WB235  | Cele.WB235_1:12093567                                                     | 1 | 12093567 | 12094297 | 731 | 59 | 11 |
| CACATTTTTTT | CACATTTTTTTG                                                              |   |          |          |     |    |    |
| Cele.WB235  | Cele.WB235_1:12109993                                                     | 1 | 12109993 | 12110203 | 211 | 7  | 30 |
| GTCATTATCA  | GTCATTATCAGCTTCTAGTGTCTTAGAAGA                                            |   |          |          |     |    |    |
| Cele.WB235  | Cele.WB235_1:12119896                                                     | 1 | 12119896 | 12120034 | 139 | 10 | 12 |
| TAAGCCTAAG  | TAAGCCTAAGCG                                                              |   |          |          |     |    |    |
| Cele.WB235  | Cele.WB235_1:12129305                                                     | 1 | 12129305 | 12129768 | 464 | 41 | 11 |
| TTGCACATTT  | TTGCACATTTT                                                               |   |          |          |     |    |    |
| Cele.WB235  | Cele.WB235_1:12175889                                                     | 1 | 12175889 | 12176021 | 133 | 9  | 12 |
| GCCTAAGCCT  | GCCTAAGCCTAA                                                              |   |          |          |     |    |    |
| Cele.WB235  | Cele.WB235_1:12192426                                                     | 1 | 12192426 | 12192752 | 327 | 4  | 73 |
| AATAAAATAT  | AATAAAATATAGAAAATCCTTATGACACACTTAAGCCTAAAGGCCCGAAAAACATACTAGGATGCCCAACTGG |   |          |          |     |    |    |
| Cele.WB235  | Cele.WB235_1:12223508                                                     | 1 | 12223508 | 12223556 | 49  | 4  | 12 |
| GCCTAAGCCT  | GCCTAAGCCTAG                                                              |   |          |          |     |    |    |
| Cele.WB235  | Cele.WB235_1:12258128                                                     | 1 | 12258128 | 12258286 | 159 | 5  | 34 |
| ATGCACCATG  | ATGCACCATGCCAAAAATATATCCAAACTCCG                                          |   |          |          |     |    |    |
| Cele.WB235  | Cele.WB235_1:12277734                                                     | 1 | 12277734 | 12277806 | 73  | 5  | 12 |
| AAGCCTAAGC  | AAGCCTAAACCG                                                              |   |          |          |     |    |    |
| Cele.WB235  | Cele.WB235_1:12479088                                                     | 1 | 12479088 | 12479300 | 213 | 16 | 12 |
| GAAATTTTTTT | GAAATTTTTTTCC                                                             |   |          |          |     |    |    |
| Cele.WB235  | Cele.WB235_1:12479365                                                     | 1 | 12479365 | 12479989 | 625 | 49 | 12 |
| AAAAAATTTTC | AAAAAATTTTCGG                                                             |   |          |          |     |    |    |
| Cele.WB235  | Cele.WB235_1:12480947                                                     | 1 | 12480947 | 12481197 | 251 | 5  | 50 |
| ACACATGCTA  | ACACATGCTATAACATTGTCTCCTTCCCTAGTGCACGAGAGCGGCCGTT                         |   |          |          |     |    |    |
| Cele.WB235  | Cele.WB235_1:12562161                                                     | 1 | 12562161 | 12562497 | 337 | 20 | 16 |
| TGATCTGATG  | TGATCTGATGATCTGA                                                          |   |          |          |     |    |    |
| Cele.WB235  | Cele.WB235_1:12585721                                                     | 1 | 12585721 | 12585826 | 106 | 5  | 21 |
| ACCACCCCTA  | ACCACCCCTACAACCTACCACC                                                    |   |          |          |     |    |    |
| Cele.WB235  | Cele.WB235_1:12612870                                                     | 1 | 12612870 | 12613263 | 394 | 5  | 32 |
| GCTGATTGGT  | GCTGATTGGTTCAAAAGTGGGCGTGGCCAATC                                          |   |          |          |     |    |    |
| Cele.WB235  | Cele.WB235_1:12620508                                                     | 1 | 12620508 | 12620574 | 67  | 5  | 12 |
| TACCTATACC  | TACCTATACCTA                                                              |   |          |          |     |    |    |
| Cele.WB235  | Cele.WB235_1:12684455                                                     | 1 | 12684455 | 12684521 | 67  | 5  | 11 |
| TTTGGAGCGG  | TTTGGAGCGGA                                                               |   |          |          |     |    |    |
| Cele.WB235  | Cele.WB235_1:12892561                                                     | 1 | 12892561 | 12892756 | 196 | 5  | 39 |
| TATTTTTTAAT | TATTTTTTAATTAACTACTTAAAAAGTAGGTCATGACC                                    |   |          |          |     |    |    |
| Cele.WB235  | Cele.WB235_1:12893074                                                     | 1 | 12893074 | 12893850 | 777 | 11 | 23 |
| ACTACAAACT  | ACTACAAACTACAACTATGAAA                                                    |   |          |          |     |    |    |
| Cele.WB235  | Cele.WB235_1:12899142                                                     | 1 | 12899142 | 12899606 | 465 | 31 | 15 |
| AAAAGGGGAT  | AAAAGGGGATCTGCA                                                           |   |          |          |     |    |    |
| Cele.WB235  | Cele.WB235_1:12910137                                                     | 1 | 12910137 | 12910261 | 125 | 6  | 21 |
| AATCCAATAT  | AATCAAATATGGTTGAAATCT                                                     |   |          |          |     |    |    |
| Cele.WB235  | Cele.WB235_1:12955954                                                     | 1 | 12955954 | 12956201 | 248 | 13 | 19 |
| CAAGGCACTA  | CAAGGTACTAGAAATGCGC                                                       |   |          |          |     |    |    |
| Cele.WB235  | Cele.WB235_1:12977769                                                     | 1 | 12977769 | 12978231 | 463 | 10 | 35 |
| GCCGGAAATT  | GCCGGAAATTTTCAATTCTGGCAGTTTACCAATTT                                       |   |          |          |     |    |    |
| Cele.WB235  | Cele.WB235_1:13014176                                                     | 1 | 13014176 | 13014829 | 654 | 16 | 35 |
| ATTGCCGGAA  | ATTGCCGGAAATTGAAAAATGCAGGCAAATCGGCAT                                      |   |          |          |     |    |    |

|            |                                                                       |   |          |          |      |     |    |
|------------|-----------------------------------------------------------------------|---|----------|----------|------|-----|----|
| Cele.WB235 | Cele.WB235_1:13019817                                                 | 1 | 13019817 | 13020208 | 392  | 8   | 14 |
| AGTTTGTAGT | AGTCTGTAGTTTGT                                                        |   |          |          |      |     |    |
| Cele.WB235 | Cele.WB235_1:13085679                                                 | 1 | 13085679 | 13085769 | 91   | 4   | 22 |
| TCGAGAAAAA | TCGAGAAAAAATCTGAAAAAAT                                                |   |          |          |      |     |    |
| Cele.WB235 | Cele.WB235_1:13093190                                                 | 1 | 13093190 | 13093270 | 81   | 5   | 16 |
| AATACGGGAA | AATACGGGAATACGGG                                                      |   |          |          |      |     |    |
| Cele.WB235 | Cele.WB235_1:13102088                                                 | 1 | 13102088 | 13102201 | 114  | 5   | 22 |
| TTTTTCTCG  | TTTTTCTCGAATTTTTTCAGA                                                 |   |          |          |      |     |    |
| Cele.WB235 | Cele.WB235_1:13154184                                                 | 1 | 13154184 | 13155089 | 906  | 19  | 39 |
| TTAAAAAGTA | TTAAAAAGTAGGTCATGACCTAATTTTAATATGACCTAC                               |   |          |          |      |     |    |
| Cele.WB235 | Cele.WB235_1:13230567                                                 | 1 | 13230567 | 13230940 | 374  | 12  | 11 |
| GTACTGTAGG | GTACTGTAGGA                                                           |   |          |          |      |     |    |
| Cele.WB235 | Cele.WB235_1:13231021                                                 | 1 | 13231021 | 13231669 | 649  | 15  | 40 |
| GAAAAATCTG | GAAAAATCTGAAATGTTCCAGAACTTTCTAGAAAAATCGA                              |   |          |          |      |     |    |
| Cele.WB235 | Cele.WB235_1:13276960                                                 | 1 | 13276960 | 13277319 | 360  | 18  | 20 |
| AAAATAGATT | AAAATAGATTGTTACACGAA                                                  |   |          |          |      |     |    |
| Cele.WB235 | Cele.WB235_1:13277345                                                 | 1 | 13277345 | 13277527 | 183  | 7   | 26 |
| CTCTGGCAGT | CTCTGGCAGTTCATAAAATAAGTGG                                             |   |          |          |      |     |    |
| Cele.WB235 | Cele.WB235_1:13404330                                                 | 1 | 13404330 | 13408464 | 4135 | 159 | 26 |
| TTTtaggtga | TTTtaggtgaatggTTAGAGTCATAA                                            |   |          |          |      |     |    |
| Cele.WB235 | Cele.WB235_1:13453071                                                 | 1 | 13453071 | 13453246 | 176  | 5   | 35 |
| TGAAAAATTC | TGAAAAATTCGGCAAATCGGCAAATTGTCGGAAT                                    |   |          |          |      |     |    |
| Cele.WB235 | Cele.WB235_1:13499215                                                 | 1 | 13499215 | 13500226 | 1012 | 11  | 14 |
| TAGTTTGTAG | TAGTTTGTAGTTTG                                                        |   |          |          |      |     |    |
| Cele.WB235 | Cele.WB235_1:13500544                                                 | 1 | 13500544 | 13500919 | 376  | 11  | 14 |
| TACAAACTAC | TATAAACTACAAAC                                                        |   |          |          |      |     |    |
| Cele.WB235 | Cele.WB235_1:13600712                                                 | 1 | 13600712 | 13601694 | 983  | 52  | 14 |
| TGTAGTATGT | TGTAGTATGTAGTT                                                        |   |          |          |      |     |    |
| Cele.WB235 | Cele.WB235_1:13610087                                                 | 1 | 13610087 | 13613799 | 3713 | 116 | 32 |
| TGAATTCCCG | TGAATTCCCGCCAAAATTTTTCACAGAAATTT                                      |   |          |          |      |     |    |
| Cele.WB235 | Cele.WB235_1:13613895                                                 | 1 | 13613895 | 13615295 | 1401 | 35  | 40 |
| GAATTTTCTC | GAATTTTCTCGAATTTTCCAGAAGGTTCTGGAACATTCCA                              |   |          |          |      |     |    |
| Cele.WB235 | Cele.WB235_1:13689387                                                 | 1 | 13689387 | 13689549 | 163  | 13  | 12 |
| TATACCTATA | TATACCTATACC                                                          |   |          |          |      |     |    |
| Cele.WB235 | Cele.WB235_1:13689822                                                 | 1 | 13689822 | 13689960 | 139  | 11  | 12 |
| ATAGGTATAG | ATAGGTATAGGT                                                          |   |          |          |      |     |    |
| Cele.WB235 | Cele.WB235_1:13768184                                                 | 1 | 13768184 | 13768352 | 169  | 7   | 21 |
| CAAAATTCGT | CAAAATTCGTCCGAAAATGCT                                                 |   |          |          |      |     |    |
| Cele.WB235 | Cele.WB235_1:13800189                                                 | 1 | 13800189 | 13800502 | 314  | 9   | 35 |
| AATTCGGGCA | AATTCGGGCAATTTGCCAATTTACCGGACAATTTA                                   |   |          |          |      |     |    |
| Cele.WB235 | Cele.WB235_1:13883897                                                 | 1 | 13883897 | 13885190 | 1294 | 19  | 68 |
| TTGGTTGAGG | TTGGTTGAGGCTAGAAAATGTTGTAGTTTGTAGTGTGTTAGCCTCAACCAAAATTAATTTTTTTTTTAA |   |          |          |      |     |    |
| Cele.WB235 | Cele.WB235_1:13925940                                                 | 1 | 13925940 | 13926100 | 161  | 8   | 20 |
| AAAAAATAGA | AAAAAATAGATTGACATACG                                                  |   |          |          |      |     |    |
| Cele.WB235 | Cele.WB235_1:13927845                                                 | 1 | 13927845 | 13927905 | 61   | 5   | 12 |
| GCCTAAGCCT | GCCTAAGCCTGA                                                          |   |          |          |      |     |    |
| Cele.WB235 | Cele.WB235_1:13929375                                                 | 1 | 13929375 | 13929595 | 221  | 5   | 63 |
| TTTTTGACTA | TTTTTGACTACGAGTGTCTTTTTCGCTACTGAGCGAAAAAATAGCTACATTTCGCACTTTTGTC      |   |          |          |      |     |    |
| Cele.WB235 | Cele.WB235_1:13935628                                                 | 1 | 13935628 | 13936488 | 861  | 15  | 64 |
| Gtagtcaaaa | GtagtcaaaaAGTCAAAAAGTGCGAATGTAGCTATTTTTTCAGTCAGTAGCGAAAAAGACATTCA     |   |          |          |      |     |    |
| Cele.WB235 | Cele.WB235_1:13960468                                                 | 1 | 13960468 | 13960552 | 85   | 4   | 21 |
| ATATTTTGTG | ATATTTTGTGACATTTTTATT                                                 |   |          |          |      |     |    |

|                                                                                                                                      |                                                                                                     |   |          |          |      |    |     |
|--------------------------------------------------------------------------------------------------------------------------------------|-----------------------------------------------------------------------------------------------------|---|----------|----------|------|----|-----|
| Cele.WB235                                                                                                                           | Cele.WB235_1:13968489                                                                               | 1 | 13968489 | 13968559 | 71   | 6  | 10  |
| GATTTTCATA                                                                                                                           | GATTTTCATA                                                                                          |   |          |          |      |    |     |
| Cele.WB235                                                                                                                           | Cele.WB235_1:14002210                                                                               | 1 | 14002210 | 14002386 | 177  | 11 | 16  |
| ATCTAAGGAT                                                                                                                           | ATCTAAGGATCTAAGT                                                                                    |   |          |          |      |    |     |
| Cele.WB235                                                                                                                           | Cele.WB235_1:14005076                                                                               | 1 | 14005076 | 14005524 | 449  | 13 | 16  |
| AGATCCTTAG                                                                                                                           | AGATCCTTAGATCCTT                                                                                    |   |          |          |      |    |     |
| Cele.WB235                                                                                                                           | Cele.WB235_1:14006294                                                                               | 1 | 14006294 | 14006390 | 97   | 6  | 16  |
| AGGATCTAAG                                                                                                                           | AGGATCTAAGGATCTA                                                                                    |   |          |          |      |    |     |
| Cele.WB235                                                                                                                           | Cele.WB235_1:14024312                                                                               | 1 | 14024312 | 14025229 | 918  | 5  | 179 |
| CTACCCAAAT                                                                                                                           |                                                                                                     |   |          |          |      |    |     |
| CTACCCAAATTTTGGAAATTTGGAAATTTTCAAAAATTCTCAAATTTTAAAAATCCCATAAATTCAGCCAATTTTGGAGATTTTCAGATATTTTAAATTGAAAATTCGTGTTGTCTTATCCATTAAACTATA |                                                                                                     |   |          |          |      |    |     |
| TCGCTGCATCTACATTTTTCACAGTACCCCATGACTTTTCCCGATT                                                                                       |                                                                                                     |   |          |          |      |    |     |
| Cele.WB235                                                                                                                           | Cele.WB235_1:14033367                                                                               | 1 | 14033367 | 14034207 | 841  | 24 | 40  |
| TTCTGGAAAA                                                                                                                           | TTCTGGAAAAGTCGGTAAATTTTGGAGTGTTCCCGAACT                                                             |   |          |          |      |    |     |
| Cele.WB235                                                                                                                           | Cele.WB235_1:14101896                                                                               | 1 | 14101896 | 14102785 | 890  | 4  | 62  |
| GTAGTTTGTA                                                                                                                           | GTAGTTTGTAGTGTGAGCCTCAACCAAACTAGCCAAAGCTTGAGTGAGGCTATGGTGATTTT                                      |   |          |          |      |    |     |
| Cele.WB235                                                                                                                           | Cele.WB235_1:14128159                                                                               | 1 | 14128159 | 14128469 | 311  | 16 | 19  |
| AACAATCTAT                                                                                                                           | AACAATCTATTTTTCGTGT                                                                                 |   |          |          |      |    |     |
| Cele.WB235                                                                                                                           | Cele.WB235_1:14137893                                                                               | 1 | 14137893 | 14138026 | 134  | 7  | 19  |
| CCCTGATACC                                                                                                                           | CCCTGATACCCCGGTCCC                                                                                  |   |          |          |      |    |     |
| Cele.WB235                                                                                                                           | Cele.WB235_1:14148103                                                                               | 1 | 14148103 | 14148989 | 887  | 5  | 177 |
| CTAACAAAAT                                                                                                                           |                                                                                                     |   |          |          |      |    |     |
| CTAACAAAATAATTAGCGTAAATTTCTACATTTTACTAGTTAACAATATTTTGATAGCATCAGTGGTTTTTGAGATACAGAAGTTATAAGATGTACGTCCAAAAATGATTGTGAGCTGCTCTTATCAAAAA  |                                                                                                     |   |          |          |      |    |     |
| TTACCATAACTTTTTACTCACTAACGGTATCAAAAATGTTTTAA                                                                                         |                                                                                                     |   |          |          |      |    |     |
| Cele.WB235                                                                                                                           | Cele.WB235_1:14257569                                                                               | 1 | 14257569 | 14258742 | 1174 | 31 | 34  |
| AAATTTGAAT                                                                                                                           | AAATTTGAATTTCCGACCAAAAAGTTTCTCAAA                                                                   |   |          |          |      |    |     |
| Cele.WB235                                                                                                                           | Cele.WB235_1:14267336                                                                               | 1 | 14267336 | 14267775 | 440  | 17 | 22  |
| GCACGGCCTG                                                                                                                           | GCATGGCCTGACGGTCTTGAGG                                                                              |   |          |          |      |    |     |
| Cele.WB235                                                                                                                           | Cele.WB235_1:14290714                                                                               | 1 | 14290714 | 14290861 | 148  | 8  | 15  |
| GGGGGCAACA                                                                                                                           | GGGGGCAACAAATTA                                                                                     |   |          |          |      |    |     |
| Cele.WB235                                                                                                                           | Cele.WB235_1:14292866                                                                               | 1 | 14292866 | 14293013 | 148  | 8  | 15  |
| TGTTGCCCCC                                                                                                                           | TGTTGACCCCTATTA                                                                                     |   |          |          |      |    |     |
| Cele.WB235                                                                                                                           | Cele.WB235_1:14321889                                                                               | 1 | 14321889 | 14321969 | 81   | 4  | 20  |
| ATATCAAAAA                                                                                                                           | ATACCAAAAAATAGATTGGC                                                                                |   |          |          |      |    |     |
| Cele.WB235                                                                                                                           | Cele.WB235_1:14324192                                                                               | 1 | 14324192 | 14324420 | 229  | 4  | 14  |
| TGTAGTTTGT                                                                                                                           | TGTAGTTTGTAGTG                                                                                      |   |          |          |      |    |     |
| Cele.WB235                                                                                                                           | Cele.WB235_1:14329713                                                                               | 1 | 14329713 | 14330118 | 406  | 4  | 101 |
| GCATTTGCAT                                                                                                                           | GCATTTGCATATAGAGATCAGATAAAAGTTAGAATTTTCCAGCCGTTGCAAGTGCCTCTATTGAGAACATTTTGAAAATTGAATGTTTCAAATTAGAGC |   |          |          |      |    |     |
| Cele.WB235                                                                                                                           | Cele.WB235_1:14332472                                                                               | 1 | 14332472 | 14332641 | 170  | 5  | 23  |
| GCACATAAG                                                                                                                            | GCATCATAAGGACTCTAGTTGAT                                                                             |   |          |          |      |    |     |
| Cele.WB235                                                                                                                           | Cele.WB235_1:14338207                                                                               | 1 | 14338207 | 14338743 | 537  | 26 | 18  |
| TTGTAGATCA                                                                                                                           | TTGTAGATCAACGGGGTC                                                                                  |   |          |          |      |    |     |
| Cele.WB235                                                                                                                           | Cele.WB235_1:14402777                                                                               | 1 | 14402777 | 14402900 | 124  | 4  | 11  |
| GTACTGTAGG                                                                                                                           | GTACTGTAGGA                                                                                         |   |          |          |      |    |     |
| Cele.WB235                                                                                                                           | Cele.WB235_1:14403308                                                                               | 1 | 14403308 | 14403517 | 210  | 6  | 35  |
| AATTTAAATT                                                                                                                           | AATTTAAATTTTCTGCGAAAAATGTTTTCAGCGGGA                                                                |   |          |          |      |    |     |
| Cele.WB235                                                                                                                           | Cele.WB235_1:14430493                                                                               | 1 | 14430493 | 14430609 | 117  | 10 | 12  |
| ATATGTATAT                                                                                                                           | ATATGTATTTGT                                                                                        |   |          |          |      |    |     |
| Cele.WB235                                                                                                                           | Cele.WB235_1:14443057                                                                               | 1 | 14443057 | 14443637 | 581  | 8  | 73  |
| TGTCGGCCGC                                                                                                                           | TGTCGGCCGCTACCAAATAAGCACCTTTTAGCACTACGTTGCGCACACACACCAAACCTGCGGAACCCCTAACA                          |   |          |          |      |    |     |
| Cele.WB235                                                                                                                           | Cele.WB235_1:14449256                                                                               | 1 | 14449256 | 14449536 | 281  | 8  | 35  |
| AAAATTTCCG                                                                                                                           | AAAATTTCCGGCAAATCGGCAATTTACCGAAAGTG                                                                 |   |          |          |      |    |     |

|             |                                                                 |   |          |          |      |    |    |
|-------------|-----------------------------------------------------------------|---|----------|----------|------|----|----|
| Cele.WB235  | Cele.WB235_1:14452267                                           | 1 | 14452267 | 14454642 | 2376 | 68 | 35 |
| GAAATTTTC   | GAAATTTTCATTTTCGGCGAAGTGCCGATTTGCCG                             |   |          |          |      |    |    |
| Cele.WB235  | Cele.WB235_1:14477083                                           | 1 | 14477083 | 14477203 | 121  | 6  | 20 |
| GTGAAATTTT  | GTGAAATTTTGAAGTTT                                               |   |          |          |      |    |    |
| Cele.WB235  | Cele.WB235_1:14481352                                           | 1 | 14481352 | 14481947 | 596  | 17 | 35 |
| CGGCAAATTG  | CGGCAAATTGCCGGAATCGAAAATTTCCGGCAAAC                             |   |          |          |      |    |    |
| Cele.WB235  | Cele.WB235_1:14554105                                           | 1 | 14554105 | 14554484 | 380  | 9  | 43 |
| TTTGCCGGTT  | TTTGCCGGTTTGCCGATTTGCCGAAATTTTCATTTCCGGCAA                      |   |          |          |      |    |    |
| Cele.WB235  | Cele.WB235_1:14619236                                           | 1 | 14619236 | 14619481 | 246  | 6  | 35 |
| CAAATCGGCA  | CAAATCGGCAAATTTTCGTTGTTGAAAAATTCGG                              |   |          |          |      |    |    |
| Cele.WB235  | Cele.WB235_1:14668547                                           | 1 | 14668547 | 14668607 | 61   | 4  | 15 |
| CCACGATGGG  | CCACGATGGGTCTCG                                                 |   |          |          |      |    |    |
| Cele.WB235  | Cele.WB235_1:14668659                                           | 1 | 14668659 | 14668849 | 191  | 5  | 40 |
| CCAGAAGGTT  | CCAGAAGGTTCTAGAACAATCCAGAATTTTTTCGAATTTT                        |   |          |          |      |    |    |
| Cele.WB235  | Cele.WB235_1:14686490                                           | 1 | 14686490 | 14687331 | 842  | 22 | 40 |
| TCTAGAAAGT  | TCTAGAAAGTTCTGGAACATTCCAGAATTTTTCGAAATT                         |   |          |          |      |    |    |
| Cele.WB235  | Cele.WB235_1:14764447                                           | 1 | 14764447 | 14764676 | 230  | 5  | 34 |
| GAAATTTCAA  | GAAACTTCAACTCCTGCAAATTGCCGATTTGCCG                              |   |          |          |      |    |    |
| Cele.WB235  | Cele.WB235_1:14772871                                           | 1 | 14772871 | 14773518 | 648  | 19 | 34 |
| CGGAAATTTTC | CGGTAATTTCAATTCGGCAAGTTGCCGATTTCC                               |   |          |          |      |    |    |
| Cele.WB235  | Cele.WB235_1:14811659                                           | 1 | 14811659 | 14812009 | 351  | 10 | 35 |
| AATTCCGGCA  | AATTACGGCACTTTGTGCGATTTTCCGAAATTTTC                             |   |          |          |      |    |    |
| Cele.WB235  | Cele.WB235_1:14822628                                           | 1 | 14822628 | 14822877 | 250  | 7  | 35 |
| CGGTTTTGGA  | CGGTTTGGGAAATTTTCGGTAATTTTGACAATTGC                             |   |          |          |      |    |    |
| Cele.WB235  | Cele.WB235_1:14843491                                           | 1 | 14843491 | 14843700 | 210  | 6  | 35 |
| TTTCAATTCC  | TTTCAATTCCGGCAATTCGCCGATTTACCAAAAAAC                            |   |          |          |      |    |    |
| Cele.WB235  | Cele.WB235_1:15025277                                           | 1 | 15025277 | 15025549 | 273  | 10 | 21 |
| AACTTTTTGG  | ACCTTTTTTGGCAGATTTTCAA                                          |   |          |          |      |    |    |
| Cele.WB235  | Cele.WB235_1:15072265                                           | 1 | 15072265 | 15072421 | 157  | 13 | 12 |
| TTAGGCTTAG  | TTAGGCTTAGGC                                                    |   |          |          |      |    |    |
| Cele.WB235  | Cele.WB235_2:0                                                  | 2 | 0        | 161      | 162  | 13 | 12 |
| CCTAAGCCTA  | CCTAAGCCTAAG                                                    |   |          |          |      |    |    |
| Cele.WB235  | Cele.WB235_2:144001                                             | 2 | 144001   | 144084   | 84   | 6  | 12 |
| ATTTCTTGCA  | ATTTCTTGCAAC                                                    |   |          |          |      |    |    |
| Cele.WB235  | Cele.WB235_2:233654                                             | 2 | 233654   | 235183   | 1530 | 40 | 35 |
| TTTCCGGCAA  | TTTCCGGCAAATCGGCCACTTGCCGGATTTGAAAA                             |   |          |          |      |    |    |
| Cele.WB235  | Cele.WB235_2:368393                                             | 2 | 368393   | 368601   | 209  | 10 | 18 |
| TAAGCCTAAG  | TAAGCCTATGTCTAAGAA                                              |   |          |          |      |    |    |
| Cele.WB235  | Cele.WB235_2:451705                                             | 2 | 451705   | 452550   | 846  | 32 | 15 |
| TCTCACCACG  | TCTCGCCACGAAGGG                                                 |   |          |          |      |    |    |
| Cele.WB235  | Cele.WB235_2:463793                                             | 2 | 463793   | 464368   | 576  | 9  | 20 |
| CAATTTTTTGA | CAATTTTTTGAAGTTAAAAAAT                                          |   |          |          |      |    |    |
| Cele.WB235  | Cele.WB235_2:573638                                             | 2 | 573638   | 573888   | 251  | 20 | 12 |
| TAGGCTTAGG  | TAGGCTTAGGCT                                                    |   |          |          |      |    |    |
| Cele.WB235  | Cele.WB235_2:586310                                             | 2 | 586310   | 587078   | 769  | 12 | 64 |
| AAATTTTGTG  | AAATTTTGTAGTTTGTAGTCTAGCAGACCCATATGAATACCAGCAAGTTGGGTCTGCCAAATC |   |          |          |      |    |    |
| Cele.WB235  | Cele.WB235_2:632493                                             | 2 | 632493   | 632813   | 321  | 8  | 40 |
| TTTCTAGAAA  | TTTCTAGAAAGTTCTGGAACATTGAGAATTTTCTCGATT                         |   |          |          |      |    |    |
| Cele.WB235  | Cele.WB235_2:632106                                             | 2 | 632106   | 632999   | 894  | 4  | 35 |
| GAAAATTTTAA | GAAAATTTTAAATTTCCCTCCAAAATTTTCTCTCA                             |   |          |          |      |    |    |
| Cele.WB235  | Cele.WB235_2:633057                                             | 2 | 633057   | 633477   | 421  | 27 | 15 |
| GGGTCTCACC  | GGGTCTCACCACGAT                                                 |   |          |          |      |    |    |

|                                                                                                                                    |                                                                          |   |         |         |      |     |     |
|------------------------------------------------------------------------------------------------------------------------------------|--------------------------------------------------------------------------|---|---------|---------|------|-----|-----|
| Cele.WB235                                                                                                                         | Cele.WB235_2:633567                                                      | 2 | 633567  | 633717  | 151  | 4   | 40  |
| CAGAAGGTTTC                                                                                                                        | CAGAAGGTTCTAGAACAAATCCAGAATTTTTTCGAATTTTC                                |   |         |         |      |     |     |
| Cele.WB235                                                                                                                         | Cele.WB235_2:633813                                                      | 2 | 633813  | 633947  | 135  | 4   | 11  |
| GTACTCCTAC                                                                                                                         | GTACTCCTACA                                                              |   |         |         |      |     |     |
| Cele.WB235                                                                                                                         | Cele.WB235_2:642340                                                      | 2 | 642340  | 642984  | 645  | 25  | 23  |
| GGCCACCAAT                                                                                                                         | GGCCACCAATTTCTTAAAAATTC                                                  |   |         |         |      |     |     |
| Cele.WB235                                                                                                                         | Cele.WB235_2:645177                                                      | 2 | 645177  | 645231  | 55   | 4   | 12  |
| GGCTCAGGCT                                                                                                                         | GGCTCAGGCTCA                                                             |   |         |         |      |     |     |
| Cele.WB235                                                                                                                         | Cele.WB235_2:674091                                                      | 2 | 674091  | 674259  | 169  | 9   | 16  |
| CCTACGTGCC                                                                                                                         | CCTACGTGCCTTCGTG                                                         |   |         |         |      |     |     |
| Cele.WB235                                                                                                                         | Cele.WB235_2:690749                                                      | 2 | 690749  | 690809  | 61   | 4   | 15  |
| GTAGATCTTG                                                                                                                         | GTAGATCTTGTTTTG                                                          |   |         |         |      |     |     |
| Cele.WB235                                                                                                                         | Cele.WB235_2:694364                                                      | 2 | 694364  | 699056  | 4693 | 287 | 15  |
| GAGACCCATC                                                                                                                         | GAGACCCATCGTGGT                                                          |   |         |         |      |     |     |
| Cele.WB235                                                                                                                         | Cele.WB235_2:694391                                                      | 2 | 694391  | 699449  | 5059 | 247 | 15  |
| GGTGAGACCC                                                                                                                         | GGTGAGACCCATCGT                                                          |   |         |         |      |     |     |
| Cele.WB235                                                                                                                         | Cele.WB235_2:851256                                                      | 2 | 851256  | 851616  | 361  | 5   | 31  |
| TGTCTAGCGA                                                                                                                         | TGTGAGCGAGACCTCAGAAGAGAGCTGAGT                                           |   |         |         |      |     |     |
| Cele.WB235                                                                                                                         | Cele.WB235_2:857683                                                      | 2 | 857683  | 857758  | 76   | 5   | 15  |
| ATGGGTCTCG                                                                                                                         | ATGGGTCTCGCCACG                                                          |   |         |         |      |     |     |
| Cele.WB235                                                                                                                         | Cele.WB235_2:863584                                                      | 2 | 863584  | 866193  | 2610 | 35  | 72  |
| TCCATCCAGC                                                                                                                         | TCCATCCAGCTGTGGTTGGTCTCTGGGTGAATCCTCGAGAAGTATCACGAGTAGTACCATTGGCTCCGTTTG |   |         |         |      |     |     |
| Cele.WB235                                                                                                                         | Cele.WB235_2:875486                                                      | 2 | 875486  | 875668  | 183  | 12  | 14  |
| TAGGATCTAG                                                                                                                         | TAGGATCTAGAGTA                                                           |   |         |         |      |     |     |
| Cele.WB235                                                                                                                         | Cele.WB235_2:878150                                                      | 2 | 878150  | 878348  | 199  | 15  | 12  |
| ACCTAGACCT                                                                                                                         | ACCTAGACCTAG                                                             |   |         |         |      |     |     |
| Cele.WB235                                                                                                                         | Cele.WB235_2:882370                                                      | 2 | 882370  | 882522  | 153  | 5   | 11  |
| TGTAGGGGTA                                                                                                                         | TGTAGGGGTAC                                                              |   |         |         |      |     |     |
| Cele.WB235                                                                                                                         | Cele.WB235_2:884525                                                      | 2 | 884525  | 885363  | 839  | 4   | 184 |
| GTTCAAAAGA                                                                                                                         |                                                                          |   |         |         |      |     |     |
| GTTCAAAAGATACAAAATTTATCTACACATCTACAAGTTAACTTGCAACTTAGTTAACCAAATTCAAAGTTATGAGCCGGGGAACATAATAACCAACGTTTCACACTAAAAAAGCCCAAAAAAATTCGAA |                                                                          |   |         |         |      |     |     |
| AATCATTTTTATCTCATGACGCGGACAAGCTACAAATGTCTAGTTAGGCTT                                                                                |                                                                          |   |         |         |      |     |     |
| Cele.WB235                                                                                                                         | Cele.WB235_2:887413                                                      | 2 | 887413  | 887570  | 158  | 8   | 20  |
| CAATCTATTT                                                                                                                         | CAATCTATTTTCTGGTATGC                                                     |   |         |         |      |     |     |
| Cele.WB235                                                                                                                         | Cele.WB235_2:891126                                                      | 2 | 891126  | 892012  | 887  | 12  | 59  |
| CAAATTTTTTT                                                                                                                        | CAAATTTTTTTTAACTGAGAATTATGGAAAATATGGATTTTTTAAATGTGCACTGGTTTTT            |   |         |         |      |     |     |
| Cele.WB235                                                                                                                         | Cele.WB235_2:1033777                                                     | 2 | 1033777 | 1034280 | 504  | 17  | 11  |
| GTACTGTAGG                                                                                                                         | GTACTGTAGTA                                                              |   |         |         |      |     |     |
| Cele.WB235                                                                                                                         | Cele.WB235_2:1034465                                                     | 2 | 1034465 | 1036445 | 1981 | 125 | 15  |
| TCGTGGTGAG                                                                                                                         | TCGTGGTGAGATCCA                                                          |   |         |         |      |     |     |
| Cele.WB235                                                                                                                         | Cele.WB235_2:1037817                                                     | 2 | 1037817 | 1039287 | 1471 | 95  | 15  |
| TCGTGGTGAG                                                                                                                         | TCGTGGTGAGTCCCA                                                          |   |         |         |      |     |     |
| Cele.WB235                                                                                                                         | Cele.WB235_2:1089504                                                     | 2 | 1089504 | 1089883 | 380  | 5   | 26  |
| GTCGGCTGCT                                                                                                                         | GTCGGCTGCTCACAAACCCTCGAGGT                                               |   |         |         |      |     |     |
| Cele.WB235                                                                                                                         | Cele.WB235_2:1134516                                                     | 2 | 1134516 | 1134593 | 78   | 5   | 15  |
| CGAAAAGGGG                                                                                                                         | CGAAAAGGGGATCTG                                                          |   |         |         |      |     |     |
| Cele.WB235                                                                                                                         | Cele.WB235_2:1134783                                                     | 2 | 1134783 | 1134875 | 93   | 6   | 15  |
| TCCCCTTTTC                                                                                                                         | TCCCCTTTTCGTATC                                                          |   |         |         |      |     |     |
| Cele.WB235                                                                                                                         | Cele.WB235_2:1178522                                                     | 2 | 1178522 | 1178806 | 285  | 8   | 26  |
| TACTGTAGTT                                                                                                                         | TACTGTAGTTTGACCTTCTAAACGAT                                               |   |         |         |      |     |     |
| Cele.WB235                                                                                                                         | Cele.WB235_2:1204743                                                     | 2 | 1204743 | 1204963 | 221  | 4   | 55  |
| GGGATTATTG                                                                                                                         | GGGATTATTGAGTTTCTTTTCTAGAATTTTTTGAAAATTTTGGACAGTTTTTC                    |   |         |         |      |     |     |

|                |                                                                                                                        |   |         |         |      |    |     |
|----------------|------------------------------------------------------------------------------------------------------------------------|---|---------|---------|------|----|-----|
| Cele.WB235     | Cele.WB235_2:1224948                                                                                                   | 2 | 1224948 | 1225028 | 81   | 5  | 12  |
| TTAGGCTTAG     | TTAGGCTTAGGC                                                                                                           |   |         |         |      |    |     |
| Cele.WB235     | Cele.WB235_2:1250454                                                                                                   | 2 | 1250454 | 1251360 | 907  | 73 | 12  |
| CTATGCCTAT     | CTATGCCTATAC                                                                                                           |   |         |         |      |    |     |
| Cele.WB235     | Cele.WB235_2:1252963                                                                                                   | 2 | 1252963 | 1253498 | 536  | 44 | 12  |
| CTATGCCTAT     | CTATGCCTATGC                                                                                                           |   |         |         |      |    |     |
| Cele.WB235     | Cele.WB235_2:1308143                                                                                                   | 2 | 1308143 | 1308573 | 431  | 7  | 63  |
| GGTCTGCTAA     | GGTCTGCTAAATCGAAACTTGTAGTTTGTAGCCTAGCAGACCCAATTTCTTCAAACTACTTGT                                                        |   |         |         |      |    |     |
| Cele.WB235     | Cele.WB235_2:1319234                                                                                                   | 2 | 1319234 | 1319605 | 372  | 5  | 73  |
| AGTTTGTAGT     | ACTTTGTAGTTTGTAGTCTAGCAGACCAAAATTTATTA AAACTGCAGAAAATTGATGGGTCTGCTAATTAAG                                              |   |         |         |      |    |     |
| Cele.WB235     | Cele.WB235_2:1404044                                                                                                   | 2 | 1404044 | 1405522 | 1479 | 12 | 63  |
| TAGTTTGTAG     | TAGTTTGTAGTCTAGCAGACCATATTTCTTCAAAACCCCATAGGTCTGCTAAATCGAACTTT                                                         |   |         |         |      |    |     |
| Cele.WB235     | Cele.WB235_2:1408410                                                                                                   | 2 | 1408410 | 1408750 | 341  | 5  | 59  |
| CTACAAACTA     | CTACAAACTACAAAAGCCTATTTAGCAGACCCACGCCAACTTCTGATGGGTCTGCTAGA                                                            |   |         |         |      |    |     |
| Cele.WB235     | Cele.WB235_2:1414614                                                                                                   | 2 | 1414614 | 1415742 | 1129 | 9  | 63  |
| TTGGTCTGCT     | TTGGTCTGCTAGACTACAAACTACAACTTTTGATTAGCAGACCCATGGGGTTTTGAAGAAAA                                                         |   |         |         |      |    |     |
| Cele.WB235     | Cele.WB235_2:1421457                                                                                                   | 2 | 1421457 | 1422023 | 567  | 41 | 12  |
| CCTATGCCTA     | CCTATGCCTATG                                                                                                           |   |         |         |      |    |     |
| Cele.WB235     | Cele.WB235_2:1455578                                                                                                   | 2 | 1455578 | 1455634 | 57   | 4  | 14  |
| TACGCTATAC     | TACGCTGTACGCTA                                                                                                         |   |         |         |      |    |     |
| Cele.WB235     | Cele.WB235_2:1467853                                                                                                   | 2 | 1467853 | 1467943 | 91   | 5  | 18  |
| GGAGGTCCAG     | GGAGGTCCAGGAACCCCT                                                                                                     |   |         |         |      |    |     |
| Cele.WB235     | Cele.WB235_2:1487465                                                                                                   | 2 | 1487465 | 1487813 | 349  | 19 | 15  |
| GGGGCAACA      | GGGGACAACAAAAA                                                                                                         |   |         |         |      |    |     |
| Cele.WB235     | Cele.WB235_2:1496871                                                                                                   | 2 | 1496871 | 1497776 | 906  | 6  | 150 |
| TTGCAACATG     |                                                                                                                        |   |         |         |      |    |     |
| TTGCAACATGCGGT | CGGCGGAAATTCAAATTTTGTAGTCAAAAACAGGTTTTTCGACCAATTTTTCATATTTTCTAGTGAAATTATGCTAGAAAAATCAATTTTCTACTCAAAATCTTCAGTTTTCGACATT |   |         |         |      |    |     |
| TTCTCATTTGGAG  | CGCAC                                                                                                                  |   |         |         |      |    |     |
| Cele.WB235     | Cele.WB235_2:1564655                                                                                                   | 2 | 1564655 | 1565350 | 696  | 7  | 96  |
| GGCCTGCGGC     | GGCCTGCGGCCCTCAAACCTGGTTATTAGGCTTGAGTGAATAACATATCTGCTTAGAATAGGATCAAAGCCAGCCCATAGTTACCAAGAGTGTTTCG                      |   |         |         |      |    |     |
| Cele.WB235     | Cele.WB235_2:1578528                                                                                                   | 2 | 1578528 | 1579311 | 784  | 24 | 23  |
| CGCTGTAAGA     | CGCTGTAAGACCATTGTGCTAT                                                                                                 |   |         |         |      |    |     |
| Cele.WB235     | Cele.WB235_2:1596937                                                                                                   | 2 | 1596937 | 1597005 | 69   | 4  | 17  |
| TCATTCCGTG     | TCATTCCGTGATTATTT                                                                                                      |   |         |         |      |    |     |
| Cele.WB235     | Cele.WB235_2:1605126                                                                                                   | 2 | 1605126 | 1605357 | 232  | 13 | 14  |
| GATCCTAGAT     | GATCCTAGATCCTA                                                                                                         |   |         |         |      |    |     |
| Cele.WB235     | Cele.WB235_2:1630503                                                                                                   | 2 | 1630503 | 1630898 | 396  | 5  | 42  |
| TTGCCGGTTG     | TTGCCGGTTGCCGAAATTTTGGAAATCAGCAACTTCGGCAA                                                                              |   |         |         |      |    |     |
| Cele.WB235     | Cele.WB235_2:1635206                                                                                                   | 2 | 1635206 | 1635601 | 396  | 5  | 42  |
| CAACCGGCAA     | CAACCGGCAATTGCCGAAGTTGCCGAACCCAAACATTTTCGG                                                                             |   |         |         |      |    |     |
| Cele.WB235     | Cele.WB235_2:1659657                                                                                                   | 2 | 1659657 | 1659775 | 119  | 7  | 17  |
| GATGCCCCCT     | GATGCCCCCTCTGAACG                                                                                                      |   |         |         |      |    |     |
| Cele.WB235     | Cele.WB235_2:1793298                                                                                                   | 2 | 1793298 | 1793504 | 207  | 6  | 34  |
| ATTTGAATTT     | ATTTGAATTTCCCGCAAATTTTTCCTACTGAAA                                                                                      |   |         |         |      |    |     |
| Cele.WB235     | Cele.WB235_2:1796656                                                                                                   | 2 | 1796656 | 1797032 | 377  | 11 | 34  |
| CGGGAAATTC     | CGGGAAATTTCAAATTTTCAGTGAAAAAATTTTGC                                                                                    |   |         |         |      |    |     |
| Cele.WB235     | Cele.WB235_2:1858665                                                                                                   | 2 | 1858665 | 1858980 | 316  | 5  | 65  |
| TATCGAGAGA     | TATCGAGAGAATTTCCAATGTTTCCAACAAAATCGATTTCCAGTTCCAATAAGACTCTCAGTAAG                                                      |   |         |         |      |    |     |
| Cele.WB235     | Cele.WB235_2:1892810                                                                                                   | 2 | 1892810 | 1893486 | 677  | 26 | 26  |
| ATTTACGGAG     | ATTTACGGAGGTTTCGATCCTGTGTCTG                                                                                           |   |         |         |      |    |     |
| Cele.WB235     | Cele.WB235_2:1962052                                                                                                   | 2 | 1962052 | 1963013 | 962  | 31 | 31  |
| AGAGCTGAGT     | AGAGCTGAGTTGTCTAGCGAGATAGCAGAGA                                                                                        |   |         |         |      |    |     |



|                                                                                                                                      |                                            |   |         |         |      |    |     |
|--------------------------------------------------------------------------------------------------------------------------------------|--------------------------------------------|---|---------|---------|------|----|-----|
| Cele.WB235                                                                                                                           | Cele.WB235_2:1968841                       | 2 | 1968841 | 1969602 | 762  | 23 | 32  |
| AATTCCCGCC                                                                                                                           | AATTCCCGCCAAAAAATTGTAAAGAAAATTTA           |   |         |         |      |    |     |
| Cele.WB235                                                                                                                           | Cele.WB235_2:1970474                       | 2 | 1970474 | 1970784 | 311  | 10 | 31  |
| AGAGCTGAGT                                                                                                                           | AGAGATGAGTTGTCGAGTGAGACCTCAGAAG            |   |         |         |      |    |     |
| Cele.WB235                                                                                                                           | Cele.WB235_2:1976612                       | 2 | 1976612 | 1976897 | 286  | 8  | 32  |
| AATTCCCGCC                                                                                                                           | AATTCCCGCCAAAAATTTTAAAGAAAATTTA            |   |         |         |      |    |     |
| Cele.WB235                                                                                                                           | Cele.WB235_2:1977769                       | 2 | 1977769 | 1979195 | 1427 | 46 | 31  |
| AGAGCTGAGT                                                                                                                           | AGAGATGAGTTGTCGAGCGAGACCTCAGAAG            |   |         |         |      |    |     |
| Cele.WB235                                                                                                                           | Cele.WB235_2:1985022                       | 2 | 1985022 | 1985847 | 826  | 25 | 32  |
| AATTCCCGCC                                                                                                                           | AATTCCCGCCAAAAATTGTAAAGAAAATTTA            |   |         |         |      |    |     |
| Cele.WB235                                                                                                                           | Cele.WB235_2:2000885                       | 2 | 2000885 | 2001197 | 313  | 26 | 12  |
| ATGTATATGT                                                                                                                           | ATGTATATGTAT                               |   |         |         |      |    |     |
| Cele.WB235                                                                                                                           | Cele.WB235_2:2002012                       | 2 | 2002012 | 2002087 | 76   | 5  | 15  |
| TCGTGGCGAG                                                                                                                           | TCGTGCGGAGACCTT                            |   |         |         |      |    |     |
| Cele.WB235                                                                                                                           | Cele.WB235_2:2002110                       | 2 | 2002110 | 2002460 | 351  | 10 | 32  |
| GGCGGGAATT                                                                                                                           | GGCGGGAATTTAAATTTTCTTGAAATTTTTC            |   |         |         |      |    |     |
| Cele.WB235                                                                                                                           | Cele.WB235_2:2008283                       | 2 | 2008283 | 2009461 | 1179 | 38 | 31  |
| GACAACTCAG                                                                                                                           | GACAACTCAGCTCTCTTCTGAGGTCTCACTC            |   |         |         |      |    |     |
| Cele.WB235                                                                                                                           | Cele.WB235_2:2050346                       | 2 | 2050346 | 2051160 | 815  | 5  | 162 |
| AGTTTTATGA                                                                                                                           |                                            |   |         |         |      |    |     |
| AGTTTTATGAAATAAAAAAGAATGACTCTATATGATTTTCCCATACTTTTGAAATTTTGAAAAATCAGCTTTTATATATTTTATCCATTTTAAAAAATACTTCCGTACAACTATTATACTTTGTTTAGC    |                                            |   |         |         |      |    |     |
| ATTTTCTGGTATTTTGGACTATGCTGAAG                                                                                                        |                                            |   |         |         |      |    |     |
| Cele.WB235                                                                                                                           | Cele.WB235_2:2110299                       | 2 | 2110299 | 2110412 | 114  | 5  | 22  |
| TGGTCAGTGC                                                                                                                           | TGGTCAGTGCAAACAATTTTAT                     |   |         |         |      |    |     |
| Cele.WB235                                                                                                                           | Cele.WB235_2:2151844                       | 2 | 2151844 | 2151904 | 61   | 4  | 11  |
| ACCGCAACGC                                                                                                                           | ACCGCAACGCA                                |   |         |         |      |    |     |
| Cele.WB235                                                                                                                           | Cele.WB235_2:2157814                       | 2 | 2157814 | 2157944 | 131  | 5  | 26  |
| TCAAGGCGAA                                                                                                                           | TCAAGGCGAAACGGGAGGTGAATCGC                 |   |         |         |      |    |     |
| Cele.WB235                                                                                                                           | Cele.WB235_2:2171107                       | 2 | 2171107 | 2172182 | 1076 | 24 | 43  |
| CGAGTTTGGC                                                                                                                           | CGAGTTTGGCCTACAGCAAATTTGGCAAATCGGCAAATTTGC |   |         |         |      |    |     |
| Cele.WB235                                                                                                                           | Cele.WB235_2:2273842                       | 2 | 2273842 | 2274055 | 214  | 8  | 21  |
| TGTGCCCTGG                                                                                                                           | TGTGCCCTGGAAAGCTGGTGG                      |   |         |         |      |    |     |
| Cele.WB235                                                                                                                           | Cele.WB235_2:2279378                       | 2 | 2279378 | 2279438 | 61   | 4  | 10  |
| CAGCAGAGTG                                                                                                                           | CAGCAGAGTG                                 |   |         |         |      |    |     |
| Cele.WB235                                                                                                                           | Cele.WB235_2:2348715                       | 2 | 2348715 | 2349106 | 392  | 13 | 11  |
| CTACAGTACC                                                                                                                           | CTACAGTACTC                                |   |         |         |      |    |     |
| Cele.WB235                                                                                                                           | Cele.WB235_2:2361743                       | 2 | 2361743 | 2363537 | 1795 | 9  | 163 |
| TGAATTTTTG                                                                                                                           |                                            |   |         |         |      |    |     |
| TGAATTTTGAATATATCAGCTTTTGGTTAAATCTGCATTTTTTAAAAATAAACTTCCGTACGAGCTAGCACCTTTTTTTAAGTATTTTCTGGTACATTTGACTATGCTGAACAGTTTTATAAAAATAAAAAA |                                            |   |         |         |      |    |     |
| GAATGACTTCATATAATTTTGAGGTACTTT                                                                                                       |                                            |   |         |         |      |    |     |
| Cele.WB235                                                                                                                           | Cele.WB235_2:2386288                       | 2 | 2386288 | 2386363 | 76   | 5  | 15  |
| TCGTGGCGAG                                                                                                                           | TCGTGCGGAGACCTT                            |   |         |         |      |    |     |
| Cele.WB235                                                                                                                           | Cele.WB235_2:2529567                       | 2 | 2529567 | 2530441 | 875  | 24 | 35  |
| CCGGAAATTT                                                                                                                           | CCGGAAATTTTCATTTTCGGCAATTTGCCGATTTG        |   |         |         |      |    |     |
| Cele.WB235                                                                                                                           | Cele.WB235_2:2550207                       | 2 | 2550207 | 2550279 | 73   | 6  | 12  |
| TTAGGCTTAG                                                                                                                           | TTAGGCTTAGGA                               |   |         |         |      |    |     |
| Cele.WB235                                                                                                                           | Cele.WB235_2:2577037                       | 2 | 2577037 | 2578087 | 1051 | 24 | 31  |
| CTGAAATTCC                                                                                                                           | CTGAAATTTCCAATTTTCCAGTGTAATAATGT           |   |         |         |      |    |     |
| Cele.WB235                                                                                                                           | Cele.WB235_2:2593754                       | 2 | 2593754 | 2594002 | 249  | 8  | 31  |
| AGAGCTGAGT                                                                                                                           | AGAGCTGAGTTGTCTAGCGAGATAGCAGAGA            |   |         |         |      |    |     |
| Cele.WB235                                                                                                                           | Cele.WB235_2:2599830                       | 2 | 2599830 | 2600053 | 224  | 7  | 32  |
| AATTCCCGCC                                                                                                                           | AATTCCCGCCAAAAATTTTCACAGAAAATTTG           |   |         |         |      |    |     |

|                                                                                                  |                                                                                                  |   |         |         |      |     |     |
|--------------------------------------------------------------------------------------------------|--------------------------------------------------------------------------------------------------|---|---------|---------|------|-----|-----|
| Cele.WB235                                                                                       | Cele.WB235_2:2599867                                                                             | 2 | 2599867 | 2600422 | 556  | 7   | 32  |
| CCGCCAAAAA                                                                                       | CCGCCAAAAAATTTTAAAGAAAATTTAAATTC                                                                 |   |         |         |      |     |     |
| Cele.WB235                                                                                       | Cele.WB235_2:2623068                                                                             | 2 | 2623068 | 2623182 | 115  | 6   | 19  |
| AAAATCGATA                                                                                       | AAAATCGATAATTTTGAGA                                                                              |   |         |         |      |     |     |
| Cele.WB235                                                                                       | Cele.WB235_2:2629919                                                                             | 2 | 2629919 | 2630440 | 522  | 10  | 14  |
| CTACAAACTA                                                                                       | CTACAACCTATAAA                                                                                   |   |         |         |      |     |     |
| Cele.WB235                                                                                       | Cele.WB235_2:2632149                                                                             | 2 | 2632149 | 2632578 | 430  | 33  | 13  |
| AGCCTAAGCT                                                                                       | AGCCTAAGCTCTA                                                                                    |   |         |         |      |     |     |
| Cele.WB235                                                                                       | Cele.WB235_2:2633519                                                                             | 2 | 2633519 | 2633585 | 67   | 5   | 12  |
| CCTAAGCCTA                                                                                       | CTTAAGCCTATG                                                                                     |   |         |         |      |     |     |
| Cele.WB235                                                                                       | Cele.WB235_2:2712830                                                                             | 2 | 2712830 | 2713528 | 699  | 7   | 95  |
| TTCGGGCCTG                                                                                       | TTCGGGCCTGCGGCCCTCAAACCTGGTTTGTAGGCTTGAGCGAATAACAATCTGCTTGGAAATAGGATTAAAGTTGGCCCACAGTTTCCAAGAGTG |   |         |         |      |     |     |
| Cele.WB235                                                                                       | Cele.WB235_2:2731022                                                                             | 2 | 2731022 | 2731082 | 61   | 4   | 12  |
| GCCTAAGCCT                                                                                       | GCCTAAGCCTAA                                                                                     |   |         |         |      |     |     |
| Cele.WB235                                                                                       | Cele.WB235_2:2733211                                                                             | 2 | 2733211 | 2733873 | 663  | 24  | 22  |
| ACTACAGTAA                                                                                       | ACTACAGTAATTCTACGTCGCT                                                                           |   |         |         |      |     |     |
| Cele.WB235                                                                                       | Cele.WB235_2:2761987                                                                             | 2 | 2761987 | 2762171 | 185  | 11  | 16  |
| CACGTAGGCA                                                                                       | CACGTAGGCAAGTAGG                                                                                 |   |         |         |      |     |     |
| Cele.WB235                                                                                       | Cele.WB235_2:2811262                                                                             | 2 | 2811262 | 2812302 | 1041 | 6   | 144 |
| TGGCCTAGAA                                                                                       |                                                                                                  |   |         |         |      |     |     |
| TGGCCTAGAAATCCAAGTTTGCAAAAGTTAGTCCACCAACTTCAAATGCCTATAACTTTGCGGAAAATCAAGATTTTTTCAGTGATTTTAAACGTA | ACTATGATGCTACTGGCTTTGCGCATCTTTTTGCCCTAC                                                          |   |         |         |      |     |     |
| TTAACGTTTGG                                                                                      |                                                                                                  |   |         |         |      |     |     |
| Cele.WB235                                                                                       | Cele.WB235_2:2817169                                                                             | 2 | 2817169 | 2817253 | 85   | 6   | 12  |
| CCTAAGCCTA                                                                                       | CCTAAGCCTAGT                                                                                     |   |         |         |      |     |     |
| Cele.WB235                                                                                       | Cele.WB235_2:2897150                                                                             | 2 | 2897150 | 2899742 | 2593 | 100 | 21  |
| CCAAAAATTG                                                                                       | CCAAAAATTGTGATTTTGTAGT                                                                           |   |         |         |      |     |     |
| Cele.WB235                                                                                       | Cele.WB235_2:2949876                                                                             | 2 | 2949876 | 2951271 | 1396 | 9   | 155 |
| TCCCGCTGTG                                                                                       |                                                                                                  |   |         |         |      |     |     |
| TCCCGCTGTGGTCAAAAGTTTTTTGTGTGCTCAGTTCTGTACGACAAATGTGTTAAAAATCTTCTGAAAAC                          | TCAAAATTC                                                                                        |   |         |         |      |     |     |
| AGTAGATGGTCGTGAGTTCAAC                                                                           |                                                                                                  |   |         |         |      |     |     |
| Cele.WB235                                                                                       | Cele.WB235_2:2957411                                                                             | 2 | 2957411 | 2957495 | 85   | 7   | 12  |
| ATAGGCATAG                                                                                       | ATAGGCATAGGC                                                                                     |   |         |         |      |     |     |
| Cele.WB235                                                                                       | Cele.WB235_2:2966318                                                                             | 2 | 2966318 | 2968108 | 1791 | 54  | 14  |
| CTACCTGCCCT                                                                                      | CTACCTGCCCTATGC                                                                                  |   |         |         |      |     |     |
| Cele.WB235                                                                                       | Cele.WB235_2:2980111                                                                             | 2 | 2980111 | 2980251 | 141  | 5   | 28  |
| AATGTGCGCT                                                                                       | AATGTGCGCTGCTTCTAGAAGCCCGGCA                                                                     |   |         |         |      |     |     |
| Cele.WB235                                                                                       | Cele.WB235_2:3033725                                                                             | 2 | 3033725 | 3034005 | 281  | 20  | 14  |
| TTAGGGCCTT                                                                                       | TTAGGGCCTTGGGT                                                                                   |   |         |         |      |     |     |
| Cele.WB235                                                                                       | Cele.WB235_2:3036430                                                                             | 2 | 3036430 | 3037140 | 711  | 18  | 19  |
| GCCAAGGCAC                                                                                       | GCCAAGGCACCTTGATAAGG                                                                             |   |         |         |      |     |     |
| Cele.WB235                                                                                       | Cele.WB235_2:3048248                                                                             | 2 | 3048248 | 3048472 | 225  | 15  | 14  |
| CTTATACCTT                                                                                       | CTTATACCTTATAC                                                                                   |   |         |         |      |     |     |
| Cele.WB235                                                                                       | Cele.WB235_2:3070377                                                                             | 2 | 3070377 | 3070511 | 135  | 4   | 31  |
| ATCGATTTTTT                                                                                      | ATCGATTTTTTTCGGTAAAAAATCAATAAAAT                                                                 |   |         |         |      |     |     |
| Cele.WB235                                                                                       | Cele.WB235_2:3102561                                                                             | 2 | 3102561 | 3102723 | 163  | 6   | 27  |
| GCTGCTGGAG                                                                                       | GCTGCTGGAGGATCCACTGCATCAACT                                                                      |   |         |         |      |     |     |
| Cele.WB235                                                                                       | Cele.WB235_2:3106228                                                                             | 2 | 3106228 | 3107119 | 892  | 33  | 27  |
| GCTGCTGGAG                                                                                       | GCTGCTGGAGGATCCACTGCATCAACT                                                                      |   |         |         |      |     |     |
| Cele.WB235                                                                                       | Cele.WB235_2:3111494                                                                             | 2 | 3111494 | 3112267 | 774  | 16  | 43  |
| TTGCCGGAAT                                                                                       | TTGCCGGAATTTGAAAAATTCCTGTAAATCGGCAAACCGGCAAC                                                     |   |         |         |      |     |     |
| Cele.WB235                                                                                       | Cele.WB235_2:3124197                                                                             | 2 | 3124197 | 3124357 | 161  | 9   | 16  |
| TAGGCACGTA                                                                                       | TAGGCACGTAAGCATG                                                                                 |   |         |         |      |     |     |

|            |                                                                                |   |         |         |      |    |    |
|------------|--------------------------------------------------------------------------------|---|---------|---------|------|----|----|
| Cele.WB235 | Cele.WB235_2:3125607                                                           | 2 | 3125607 | 3125959 | 353  | 18 | 16 |
| TACGTGCCTA | TACGTGCCTACGTGCC                                                               |   |         |         |      |    |    |
| Cele.WB235 | Cele.WB235_2:3136277                                                           | 2 | 3136277 | 3136467 | 191  | 8  | 12 |
| GGCTTAGGCT | GGCTTAGGCTTA                                                                   |   |         |         |      |    |    |
| Cele.WB235 | Cele.WB235_2:3145088                                                           | 2 | 3145088 | 3145138 | 51   | 4  | 10 |
| AACTTTCGAA | AACTTTCGAA                                                                     |   |         |         |      |    |    |
| Cele.WB235 | Cele.WB235_2:3152725                                                           | 2 | 3152725 | 3152861 | 137  | 8  | 16 |
| AGGCACGTAG | AGGCACGTAGGCATAT                                                               |   |         |         |      |    |    |
| Cele.WB235 | Cele.WB235_2:3153871                                                           | 2 | 3153871 | 3153936 | 66   | 4  | 14 |
| CCAAGGCCCA | CCAAGGCCCAAGGC                                                                 |   |         |         |      |    |    |
| Cele.WB235 | Cele.WB235_2:3179723                                                           | 2 | 3179723 | 3180290 | 568  | 21 | 16 |
| GTAGGCACGT | GTAGGCACGTAGGCAC                                                               |   |         |         |      |    |    |
| Cele.WB235 | Cele.WB235_2:3246632                                                           | 2 | 3246632 | 3247175 | 544  | 19 | 20 |
| GTAAATCTAC | GTAAATCTACACTTGCTTCC                                                           |   |         |         |      |    |    |
| Cele.WB235 | Cele.WB235_2:3271556                                                           | 2 | 3271556 | 3272244 | 689  | 42 | 16 |
| CGTAGGCACG | CGTAGGCACGTGGGCG                                                               |   |         |         |      |    |    |
| Cele.WB235 | Cele.WB235_2:3290648                                                           | 2 | 3290648 | 3290783 | 136  | 5  | 27 |
| TTTACTCTCT | TTTACTCTCTGTGGCTTCCCACTATAT                                                    |   |         |         |      |    |    |
| Cele.WB235 | Cele.WB235_2:3301138                                                           | 2 | 3301138 | 3301263 | 126  | 4  | 22 |
| ATTCTGCGCA | ATTCTGCGCACCCCCTGCGCCG                                                         |   |         |         |      |    |    |
| Cele.WB235 | Cele.WB235_2:3365918                                                           | 2 | 3365918 | 3365978 | 61   | 4  | 15 |
| GGTGAGACCC | GGTGAGACCCATCGT                                                                |   |         |         |      |    |    |
| Cele.WB235 | Cele.WB235_2:3415307                                                           | 2 | 3415307 | 3415447 | 141  | 4  | 28 |
| TGCCTCGCCT | TGCCTCGCCTACGTGCCTATTTTCAGGCA                                                  |   |         |         |      |    |    |
| Cele.WB235 | Cele.WB235_2:3420081                                                           | 2 | 3420081 | 3420246 | 166  | 5  | 16 |
| GCACGTAGGC | GCACGTAAGCACGTAG                                                               |   |         |         |      |    |    |
| Cele.WB235 | Cele.WB235_2:3459359                                                           | 2 | 3459359 | 3459467 | 109  | 5  | 18 |
| GGCTTAGGCT | GGCTTAGGCTTAGGCTCA                                                             |   |         |         |      |    |    |
| Cele.WB235 | Cele.WB235_2:3471040                                                           | 2 | 3471040 | 3471110 | 71   | 4  | 12 |
| ATACATATAC | ATACATATACAT                                                                   |   |         |         |      |    |    |
| Cele.WB235 | Cele.WB235_2:3490327                                                           | 2 | 3490327 | 3491001 | 675  | 54 | 12 |
| TAGGTATAGG | TAGGTAAAGGCA                                                                   |   |         |         |      |    |    |
| Cele.WB235 | Cele.WB235_2:3494517                                                           | 2 | 3494517 | 3494748 | 232  | 5  | 39 |
| AATTTCCCGC | AATTTCCCGCCAAAAATTTACGTTTTTCAGAAAAATTCA                                        |   |         |         |      |    |    |
| Cele.WB235 | Cele.WB235_2:3496033                                                           | 2 | 3496033 | 3496764 | 732  | 18 | 31 |
| GGTTACTGTA | GGTTACTGTAACTCAAGCCTGAGATTCTTCG                                                |   |         |         |      |    |    |
| Cele.WB235 | Cele.WB235_2:3512519                                                           | 2 | 3512519 | 3512671 | 153  | 9  | 16 |
| GTAGGCACGT | GTAGGTACGTAGGCAC                                                               |   |         |         |      |    |    |
| Cele.WB235 | Cele.WB235_2:3572146                                                           | 2 | 3572146 | 3572433 | 288  | 6  | 42 |
| TTTGAAAACC | TTTGAAAACCTGCAATATCCGGAATTGCCGAAAT                                             |   |         |         |      |    |    |
| Cele.WB235 | Cele.WB235_2:3641762                                                           | 2 | 3641762 | 3641852 | 91   | 5  | 20 |
| CTATCGCCTG | CTATCGCCTGCTAGCGCCTA                                                           |   |         |         |      |    |    |
| Cele.WB235 | Cele.WB235_2:3691112                                                           | 2 | 3691112 | 3691360 | 249  | 8  | 31 |
| GCTGATTGGT | GCTGATTGGTCGGCATGGTCTGCTCATCATC                                                |   |         |         |      |    |    |
| Cele.WB235 | Cele.WB235_2:3753993                                                           | 2 | 3753993 | 3754089 | 97   | 4  | 24 |
| TGCATCTGCC | TGCATCTGCCACAGGAGCTGGCGT                                                       |   |         |         |      |    |    |
| Cele.WB235 | Cele.WB235_2:3937888                                                           | 2 | 3937888 | 3938177 | 290  | 6  | 45 |
| AAGGATCAGA | AAGGATCAGAAGGGTACCTCCTGATGATCTGATCCTTCAGCTTCA                                  |   |         |         |      |    |    |
| Cele.WB235 | Cele.WB235_2:3941820                                                           | 2 | 3941820 | 3946547 | 4728 | 58 | 79 |
| GTGAATCTCC | GTGAATCTCTCTCTACCTAATGAGTACTGACAGAATACCGGCAGTATTCTGGGGTCTCATTAGGTTTTAGTTTCTTCT |   |         |         |      |    |    |
| Cele.WB235 | Cele.WB235_2:3994649                                                           | 2 | 3994649 | 3994788 | 140  | 7  | 20 |
| AAATAGATTG | AAATAGATTGTTACACGAAA                                                           |   |         |         |      |    |    |

|            |                                                                             |   |         |         |      |    |    |
|------------|-----------------------------------------------------------------------------|---|---------|---------|------|----|----|
| Cele.WB235 | Cele.WB235_2:4030891                                                        | 2 | 4030891 | 4031711 | 821  | 4  | 16 |
| TGCCTACGTG | TGCCTACGTGCTACG                                                             |   |         |         |      |    |    |
| Cele.WB235 | Cele.WB235_2:4054458                                                        | 2 | 4054458 | 4054819 | 362  | 4  | 21 |
| CTACGTAAGA | CTACGTAAGAGTAGCGCAGGA                                                       |   |         |         |      |    |    |
| Cele.WB235 | Cele.WB235_2:4081925                                                        | 2 | 4081925 | 4082141 | 217  | 14 | 12 |
| CTTAGGCTTA | CTTAGGTTTAGA                                                                |   |         |         |      |    |    |
| Cele.WB235 | Cele.WB235_2:4094407                                                        | 2 | 4094407 | 4094663 | 257  | 13 | 11 |
| GTACTGTAGG | GTACTGTAGGA                                                                 |   |         |         |      |    |    |
| Cele.WB235 | Cele.WB235_2:4138713                                                        | 2 | 4138713 | 4139388 | 676  | 4  | 11 |
| TGCCTGCCTA | TGCCTGCCTAC                                                                 |   |         |         |      |    |    |
| Cele.WB235 | Cele.WB235_2:4140823                                                        | 2 | 4140823 | 4140867 | 45   | 4  | 11 |
| GGCAGGCAGT | GGCAGGCAGTA                                                                 |   |         |         |      |    |    |
| Cele.WB235 | Cele.WB235_2:4205778                                                        | 2 | 4205778 | 4205946 | 169  | 5  | 24 |
| GTGAGGTACG | GTGAGGTACGAGATGAGGTACAAG                                                    |   |         |         |      |    |    |
| Cele.WB235 | Cele.WB235_2:4207582                                                        | 2 | 4207582 | 4207842 | 261  | 25 | 10 |
| GCGTTAGCAG | GCGTTAGCAG                                                                  |   |         |         |      |    |    |
| Cele.WB235 | Cele.WB235_2:4210804                                                        | 2 | 4210804 | 4210907 | 104  | 5  | 18 |
| TGCAAGACTA | TGCAAGACTAATAGAGAC                                                          |   |         |         |      |    |    |
| Cele.WB235 | Cele.WB235_2:4259952                                                        | 2 | 4259952 | 4260552 | 601  | 24 | 25 |
| GAGAGTAAAA | GAGAGTAAAAATATACGGTGAAGCCA                                                  |   |         |         |      |    |    |
| Cele.WB235 | Cele.WB235_2:4260577                                                        | 2 | 4260577 | 4261267 | 691  | 40 | 15 |
| GTCTCACCAC | GTCTCACCACGAAGG                                                             |   |         |         |      |    |    |
| Cele.WB235 | Cele.WB235_2:4296664                                                        | 2 | 4296664 | 4296988 | 325  | 8  | 35 |
| TTCCGGCAAA | TTCCGGCAAAACGGCAAATTGTCAAAATTGAAAAAT                                        |   |         |         |      |    |    |
| Cele.WB235 | Cele.WB235_2:4309186                                                        | 2 | 4309186 | 4309439 | 254  | 23 | 11 |
| CAGTTGTCAC | CAGTTATCACC                                                                 |   |         |         |      |    |    |
| Cele.WB235 | Cele.WB235_2:4312357                                                        | 2 | 4312357 | 4312429 | 73   | 4  | 12 |
| AGCCTAAGCC | AGCCTTAGCCTA                                                                |   |         |         |      |    |    |
| Cele.WB235 | Cele.WB235_2:4365202                                                        | 2 | 4365202 | 4365284 | 83   | 4  | 12 |
| TAAGCCTAAG | TAAGCCTAAGAC                                                                |   |         |         |      |    |    |
| Cele.WB235 | Cele.WB235_2:4442528                                                        | 2 | 4442528 | 4442746 | 219  | 20 | 11 |
| TGCACATTTT | TGCACATTTT                                                                  |   |         |         |      |    |    |
| Cele.WB235 | Cele.WB235_2:4554394                                                        | 2 | 4554394 | 4554914 | 521  | 13 | 40 |
| TCCAGAACCT | TCCAGAACCTTCTGGAAAAATTCGAGAAAATTCTGGAATGT                                   |   |         |         |      |    |    |
| Cele.WB235 | Cele.WB235_2:4555047                                                        | 2 | 4555047 | 4555687 | 641  | 20 | 32 |
| CGGGAATTCA | CGGGAATTCAAAATTTCTGTGAAAAATTTTGG                                            |   |         |         |      |    |    |
| Cele.WB235 | Cele.WB235_2:4569011                                                        | 2 | 4569011 | 4569221 | 211  | 5  | 35 |
| TTTGCCGGAA | TTTGCCGGAAATTTTCAATTTTCGGAAAATTGCCGG                                        |   |         |         |      |    |    |
| Cele.WB235 | Cele.WB235_2:4684299                                                        | 2 | 4684299 | 4684389 | 91   | 6  | 15 |
| GAGACCCATC | GAGACCCATCGTGGC                                                             |   |         |         |      |    |    |
| Cele.WB235 | Cele.WB235_2:4684295                                                        | 2 | 4684295 | 4684838 | 544  | 21 | 15 |
| TGGTGAGACC | TGGTGAGACCCATCG                                                             |   |         |         |      |    |    |
| Cele.WB235 | Cele.WB235_2:5073308                                                        | 2 | 5073308 | 5077334 | 4027 | 52 | 76 |
| TGTATTTTGA | TGTATTTTGAAAGGTCATCTCAATAGAAAAGATGGAAGACTACAGAAAACTATTGTGAGACCCCGAAATACTGGC |   |         |         |      |    |    |
| Cele.WB235 | Cele.WB235_2:5097197                                                        | 2 | 5097197 | 5097899 | 703  | 27 | 26 |
| TTAGACCATT | TTAGACCATTAGATGAATTCCCAAAG                                                  |   |         |         |      |    |    |
| Cele.WB235 | Cele.WB235_2:5144313                                                        | 2 | 5144313 | 5144565 | 253  | 9  | 25 |
| AGAGTAAAT  | AGAGTAAATAATTGGTGAAGCCAG                                                    |   |         |         |      |    |    |
| Cele.WB235 | Cele.WB235_2:5144410                                                        | 2 | 5144410 | 5146766 | 2357 | 80 | 25 |
| AGCCAGAGAG | AGCCACAGAGTAAATAATTGGGAA                                                    |   |         |         |      |    |    |
| Cele.WB235 | Cele.WB235_2:5627848                                                        | 2 | 5627848 | 5628154 | 307  | 9  | 34 |
| GGAATTGAAA | GGAATTGAAATTTCCAGCAAATCGGCAAATTGCC                                          |   |         |         |      |    |    |

|                                                                                                                                       |                                                                                         |   |         |         |      |    |     |
|---------------------------------------------------------------------------------------------------------------------------------------|-----------------------------------------------------------------------------------------|---|---------|---------|------|----|-----|
| Cele.WB235                                                                                                                            | Cele.WB235_2:6073626                                                                    | 2 | 6073626 | 6077427 | 3802 | 21 | 181 |
| TTTTTAACCTT                                                                                                                           |                                                                                         |   |         |         |      |    |     |
| TTTTTAACCTTTAAATCCACTAAAACTTGAATGGTACAGAACATGCAAATTGTAATTTTAAGAACTGAATGTGGTTTCGAATATTCATGGATTGCTTTATTTCGAACACTGACTCTGAAATATTTTGCATCCA |                                                                                         |   |         |         |      |    |     |
| TTTGACTATTAAATTGTCATATTATACCGAACACTACTAACCTTACTGG                                                                                     |                                                                                         |   |         |         |      |    |     |
| Cele.WB235                                                                                                                            | Cele.WB235_2:6082023                                                                    | 2 | 6082023 | 6082291 | 269  | 6  | 45  |
| CTGAAGGATC                                                                                                                            | CTGAAGGATCAGACCATCAGGAGGTACCCCTTACGATCCTTCTTAT                                          |   |         |         |      |    |     |
| Cele.WB235                                                                                                                            | Cele.WB235_2:6185280                                                                    | 2 | 6185280 | 6186470 | 1191 | 85 | 14  |
| ACGCTATACG                                                                                                                            | ACGCTATACGCTAT                                                                          |   |         |         |      |    |     |
| Cele.WB235                                                                                                                            | Cele.WB235_2:6296590                                                                    | 2 | 6296590 | 6296638 | 49   | 4  | 12  |
| CCACTGACCA                                                                                                                            | CCACTGACCATC                                                                            |   |         |         |      |    |     |
| Cele.WB235                                                                                                                            | Cele.WB235_2:6296691                                                                    | 2 | 6296691 | 6297095 | 405  | 6  | 68  |
| AATAGAGACG                                                                                                                            | AATAGAGACGAATAAAATTTTAAAAATTTTATTGGTGTCTCTATTTTATCAAGCAAATATATTTTCAA                    |   |         |         |      |    |     |
| Cele.WB235                                                                                                                            | Cele.WB235_2:6434384                                                                    | 2 | 6434384 | 6434544 | 161  | 5  | 32  |
| AAAAATTTTC                                                                                                                            | AAAAATTTTCACAAAAATTTAAATTCCTGCA                                                         |   |         |         |      |    |     |
| Cele.WB235                                                                                                                            | Cele.WB235_2:6434384                                                                    | 2 | 6434384 | 6435137 | 754  | 6  | 32  |
| AAAAATTTTC                                                                                                                            | AAAAATTTTCACAAAAATTTAAATTCCTGCA                                                         |   |         |         |      |    |     |
| Cele.WB235                                                                                                                            | Cele.WB235_2:7379726                                                                    | 2 | 7379726 | 7379898 | 173  | 4  | 41  |
| AAAACGGGAA                                                                                                                            | AAAACGGGAAAACGGGAATTCCTGTTCCCGTGAAAATTTTA                                               |   |         |         |      |    |     |
| Cele.WB235                                                                                                                            | Cele.WB235_2:7379725                                                                    | 2 | 7379725 | 7380258 | 534  | 10 | 41  |
| AAAACGGGGA                                                                                                                            | AAAACGGGAAAACGGGAATTCCTGTTCCCGTGAAAATTTT                                                |   |         |         |      |    |     |
| Cele.WB235                                                                                                                            | Cele.WB235_2:7446830                                                                    | 2 | 7446830 | 7448192 | 1363 | 34 | 14  |
| GAAGGATCGG                                                                                                                            | GAAGGATCGGGTCG                                                                          |   |         |         |      |    |     |
| Cele.WB235                                                                                                                            | Cele.WB235_2:7449335                                                                    | 2 | 7449335 | 7450152 | 818  | 42 | 16  |
| CGGAAAAATT                                                                                                                            | CGGAAAAATTTTGCTG                                                                        |   |         |         |      |    |     |
| Cele.WB235                                                                                                                            | Cele.WB235_2:7450879                                                                    | 2 | 7450879 | 7451382 | 504  | 27 | 10  |
| TCCATCCCGA                                                                                                                            | TCCATCCAC                                                                               |   |         |         |      |    |     |
| Cele.WB235                                                                                                                            | Cele.WB235_2:7475407                                                                    | 2 | 7475407 | 7475467 | 61   | 4  | 15  |
| GTAGATCTTG                                                                                                                            | GTAGATCTTGAAAAAT                                                                        |   |         |         |      |    |     |
| Cele.WB235                                                                                                                            | Cele.WB235_2:7894727                                                                    | 2 | 7894727 | 7894819 | 93   | 6  | 15  |
| CGAAAAGGGG                                                                                                                            | CGAAAAGGGGATCTG                                                                         |   |         |         |      |    |     |
| Cele.WB235                                                                                                                            | Cele.WB235_2:7894995                                                                    | 2 | 7894995 | 7895087 | 93   | 6  | 15  |
| CCCCTTTTCG                                                                                                                            | CCCCTTTTCGTATCT                                                                         |   |         |         |      |    |     |
| Cele.WB235                                                                                                                            | Cele.WB235_2:8287652                                                                    | 2 | 8287652 | 8292933 | 5282 | 61 | 79  |
| TGAGTCCTGA                                                                                                                            | TGAGTCCTGACAGAATACCGGCAGTATCTCGGGTCTCATTAGGTTGTCTTTCTTTTCTGAATCTCCACTCTCCGAA            |   |         |         |      |    |     |
| Cele.WB235                                                                                                                            | Cele.WB235_2:8460034                                                                    | 2 | 8460034 | 8460434 | 401  | 10 | 40  |
| AAAGTTCTGG                                                                                                                            | AAAGTTCTGGGAACATTACAGAAATTTCTCGATTTTCTAG                                                |   |         |         |      |    |     |
| Cele.WB235                                                                                                                            | Cele.WB235_2:8460726                                                                    | 2 | 8460726 | 8460801 | 76   | 4  | 15  |
| GGGTCTCACC                                                                                                                            | GGGTCTCACCACGAC                                                                         |   |         |         |      |    |     |
| Cele.WB235                                                                                                                            | Cele.WB235_2:8975477                                                                    | 2 | 8975477 | 8977487 | 2011 | 24 | 86  |
| AGCCAGTATT                                                                                                                            | AGCCAGTATTTCTGGGGTCTGGCAATAGCTTCTCTTTAACTTCGAACTCTTCCATCTTTTCCCTATTGCCACGACCTTTCAAATAAC |   |         |         |      |    |     |
| Cele.WB235                                                                                                                            | Cele.WB235_2:9202102                                                                    | 2 | 9202102 | 9202507 | 406  | 27 | 15  |
| TGGTGAGACC                                                                                                                            | TGGTGAGACCCATCG                                                                         |   |         |         |      |    |     |
| Cele.WB235                                                                                                                            | Cele.WB235_2:9202534                                                                    | 2 | 9202534 | 9203060 | 527  | 15 | 35  |
| ATTCAAATTT                                                                                                                            | ATTCAAATTTTGTAGTGAATAATTTTGGAGGGAA                                                      |   |         |         |      |    |     |
| Cele.WB235                                                                                                                            | Cele.WB235_2:9202525                                                                    | 2 | 9202525 | 9203501 | 977  | 16 | 35  |
| TGGCGGGAAA                                                                                                                            | TGGCGGGAAATTCAAATTTTGTAGTGAATAATTTT                                                     |   |         |         |      |    |     |
| Cele.WB235                                                                                                                            | Cele.WB235_2:9404845                                                                    | 2 | 9404845 | 9405392 | 548  | 22 | 25  |
| GGCTTCACAG                                                                                                                            | GGCTTCACAGAATAATTTACTCTCC                                                               |   |         |         |      |    |     |
| Cele.WB235                                                                                                                            | Cele.WB235_2:9631891                                                                    | 2 | 9631891 | 9633131 | 1241 | 31 | 40  |
| TTCTGGAACA                                                                                                                            | TTCTGGAACATTCCAGAATTTTCTCGATTTTCTAGAAAG                                                 |   |         |         |      |    |     |
| Cele.WB235                                                                                                                            | Cele.WB235_2:9633206                                                                    | 2 | 9633206 | 9633906 | 701  | 20 | 35  |
| CCAAAATATT                                                                                                                            | CCAAAATATTTTCTCAGAAAATTTAAATTTCCCT                                                      |   |         |         |      |    |     |

|             |                                               |   |          |          |      |    |    |
|-------------|-----------------------------------------------|---|----------|----------|------|----|----|
| Cele.WB235  | Cele.WB235_2:9633989                          | 2 | 9633989  | 9634259  | 271  | 17 | 15 |
| CCACGATGGG  | CCACGATGGGTCTCA                               |   |          |          |      |    |    |
| Cele.WB235  | Cele.WB235_2:9634505                          | 2 | 9634505  | 9634639  | 135  | 5  | 11 |
| GTACTCCTAC  | GTACTCCTACA                                   |   |          |          |      |    |    |
| Cele.WB235  | Cele.WB235_2:9693772                          | 2 | 9693772  | 9694139  | 368  | 4  | 42 |
| CAGCCGACAG  | CAGCCGACAGCCGAAAAATTGCGATTTTTCGGCTGGTAGCAC    |   |          |          |      |    |    |
| Cele.WB235  | Cele.WB235_2:9719802                          | 2 | 9719802  | 9720144  | 343  | 16 | 19 |
| ATAAAATATTA | ATAAAATATTAATAATAA                            |   |          |          |      |    |    |
| Cele.WB235  | Cele.WB235_2:10248425                         | 2 | 10248425 | 10248517 | 93   | 6  | 15 |
| TCCCCTTTTC  | TCCCCTTTTCGTTGC                               |   |          |          |      |    |    |
| Cele.WB235  | Cele.WB235_2:10336035                         | 2 | 10336035 | 10336399 | 365  | 14 | 26 |
| TATGACTCTA  | TATGACTCTAACCATTACACCTTAAAA                   |   |          |          |      |    |    |
| Cele.WB235  | Cele.WB235_2:10466292                         | 2 | 10466292 | 10466385 | 94   | 5  | 18 |
| TAAATAAGTG  | TAAATAAGTGGCTATAAG                            |   |          |          |      |    |    |
| Cele.WB235  | Cele.WB235_2:10713445                         | 2 | 10713445 | 10714142 | 698  | 8  | 35 |
| TTTCTGGCAA  | TTTCTGGCAAATCGGCAGTTTGCCGAAAATTAAAT           |   |          |          |      |    |    |
| Cele.WB235  | Cele.WB235_2:10832628                         | 2 | 10832628 | 10833651 | 1024 | 24 | 11 |
| GTACTGTAGG  | GTACTGTAGGA                                   |   |          |          |      |    |    |
| Cele.WB235  | Cele.WB235_2:11122559                         | 2 | 11122559 | 11122763 | 205  | 16 | 12 |
| AATAAAAATA  | AATAAAAATAAA                                  |   |          |          |      |    |    |
| Cele.WB235  | Cele.WB235_2:11230254                         | 2 | 11230254 | 11230477 | 224  | 5  | 44 |
| AAGGATCAGA  | AAGGATCAGATCATCAGGCAGAGCCTCATGCTCTTTTGGAGCTG  |   |          |          |      |    |    |
| Cele.WB235  | Cele.WB235_2:11306986                         | 2 | 11306986 | 11307037 | 52   | 4  | 12 |
| ACTATAACTA  | ACTACAACCTACA                                 |   |          |          |      |    |    |
| Cele.WB235  | Cele.WB235_2:11365554                         | 2 | 11365554 | 11365650 | 97   | 5  | 24 |
| GCTTAGGCTT  | GCTTAGGCTTAGGCTTGGGCTCAA                      |   |          |          |      |    |    |
| Cele.WB235  | Cele.WB235_2:11423462                         | 2 | 11423462 | 11423661 | 200  | 9  | 20 |
| AAAAAATAGA  | AAAAAATAGATTGGCATAACG                         |   |          |          |      |    |    |
| Cele.WB235  | Cele.WB235_2:11527871                         | 2 | 11527871 | 11528452 | 582  | 13 | 45 |
| TCTGATCCTT  | TCTGATCCTTCAGCTCCGAAGGATCACATGGGTACCTTCTGATGT |   |          |          |      |    |    |
| Cele.WB235  | Cele.WB235_2:11530067                         | 2 | 11530067 | 11530424 | 358  | 8  | 45 |
| GAAGGATCAG  | GAAGGATCAGATCATCAGAAGGTACCCATGTGATCCTTCGGATCG |   |          |          |      |    |    |
| Cele.WB235  | Cele.WB235_2:11534628                         | 2 | 11534628 | 11534720 | 93   | 6  | 15 |
| CGAAAAGGGG  | CGAAAAGGGGATCTG                               |   |          |          |      |    |    |
| Cele.WB235  | Cele.WB235_2:11534895                         | 2 | 11534895 | 11534970 | 76   | 5  | 15 |
| TCCCCTTTTC  | TCCCCTTTTCGTATC                               |   |          |          |      |    |    |
| Cele.WB235  | Cele.WB235_2:11660023                         | 2 | 11660023 | 11660287 | 265  | 8  | 33 |
| AATTGAAAAT  | AATTGAAAATCCAGCAAATGGGCAAATTGCCGT             |   |          |          |      |    |    |
| Cele.WB235  | Cele.WB235_2:11733044                         | 2 | 11733044 | 11733122 | 79   | 6  | 12 |
| CTTAGGCTTA  | CTTAGGCTTAGG                                  |   |          |          |      |    |    |
| Cele.WB235  | Cele.WB235_2:11905368                         | 2 | 11905368 | 11905475 | 108  | 8  | 12 |
| AGGCTTAGGC  | AGGCTTAAGCTT                                  |   |          |          |      |    |    |
| Cele.WB235  | Cele.WB235_2:11906637                         | 2 | 11906637 | 11907671 | 1035 | 44 | 20 |
| TAAATCTACA  | TAAATCTACACAGGTGGTG                           |   |          |          |      |    |    |
| Cele.WB235  | Cele.WB235_2:11930277                         | 2 | 11930277 | 11930409 | 133  | 10 | 12 |
| AAGCCTAAGC  | AAGCCTAACCAT                                  |   |          |          |      |    |    |
| Cele.WB235  | Cele.WB235_2:11932324                         | 2 | 11932324 | 11932498 | 175  | 10 | 12 |
| AGGCTTAGGC  | AGGCTTAGACTT                                  |   |          |          |      |    |    |
| Cele.WB235  | Cele.WB235_2:12002438                         | 2 | 12002438 | 12002513 | 76   | 4  | 15 |
| AAAACAAGAT  | AAAAGAAGATCTACA                               |   |          |          |      |    |    |
| Cele.WB235  | Cele.WB235_2:12171287                         | 2 | 12171287 | 12172252 | 966  | 32 | 30 |
| CAAACCTACAG | CAAACCTACAGTAGCACTGTAGTACCATAAC               |   |          |          |      |    |    |

|             |                                                                        |   |          |          |      |     |    |
|-------------|------------------------------------------------------------------------|---|----------|----------|------|-----|----|
| Cele.WB235  | Cele.WB235_2:12239992                                                  | 2 | 12239992 | 12240106 | 115  | 7   | 12 |
| TTAGTCTTAG  | TTAGTCTTAGGC                                                           |   |          |          |      |     |    |
| Cele.WB235  | Cele.WB235_2:12247672                                                  | 2 | 12247672 | 12247768 | 97   | 7   | 12 |
| CCTAAGCCCTA | CCTAACCCTAAG                                                           |   |          |          |      |     |    |
| Cele.WB235  | Cele.WB235_2:12322418                                                  | 2 | 12322418 | 12322496 | 79   | 5   | 12 |
| TTAGGCTTAG  | TTAGGCTCAGGC                                                           |   |          |          |      |     |    |
| Cele.WB235  | Cele.WB235_2:12336337                                                  | 2 | 12336337 | 12336616 | 280  | 4   | 69 |
| AGGTAGGCCT  | AGGTAGGCCTGTAGGCATTGACTGGCAGAAAAAGTGTAGGCAGGCAGGCAGGTAAAAAGATACATGCGGC |   |          |          |      |     |    |
| Cele.WB235  | Cele.WB235_2:12350820                                                  | 2 | 12350820 | 12350876 | 57   | 5   | 11 |
| CTACAGTACC  | CTACAGTACCT                                                            |   |          |          |      |     |    |
| Cele.WB235  | Cele.WB235_2:12353539                                                  | 2 | 12353539 | 12353707 | 169  | 14  | 12 |
| CCTATACCTA  | CCTATACCTATG                                                           |   |          |          |      |     |    |
| Cele.WB235  | Cele.WB235_2:12381010                                                  | 2 | 12381010 | 12381194 | 185  | 13  | 12 |
| AGCCTAAGCC  | AGCCTAAGCCTA                                                           |   |          |          |      |     |    |
| Cele.WB235  | Cele.WB235_2:12402768                                                  | 2 | 12402768 | 12404058 | 1291 | 30  | 43 |
| TTTCCGGCAA  | TTTCCGGCAAACCGCAAACCGGTGATTTGCCGAAAATGCGAA                             |   |          |          |      |     |    |
| Cele.WB235  | Cele.WB235_2:12455807                                                  | 2 | 12455807 | 12455995 | 189  | 6   | 31 |
| GACATCTCGC  | GACATCTCGCAGGACAATATAAAAAGCGACC                                        |   |          |          |      |     |    |
| Cele.WB235  | Cele.WB235_2:12467214                                                  | 2 | 12467214 | 12467281 | 68   | 5   | 12 |
| GGCTTAGGCT  | GGCTTAGGCTTA                                                           |   |          |          |      |     |    |
| Cele.WB235  | Cele.WB235_2:12575393                                                  | 2 | 12575393 | 12575478 | 86   | 5   | 17 |
| ACTTGGTACA  | ACTTGGTACATAGACCA                                                      |   |          |          |      |     |    |
| Cele.WB235  | Cele.WB235_2:12577021                                                  | 2 | 12577021 | 12577399 | 379  | 8   | 42 |
| TTGCCGAACC  | TTGCCGAACCGTAAAAATTTGCGCAAACGGGAATTGCCAAAG                             |   |          |          |      |     |    |
| Cele.WB235  | Cele.WB235_2:12649041                                                  | 2 | 12649041 | 12649452 | 412  | 11  | 37 |
| ATTTTGGCGG  | ATTTTGGCGGGAATTCAAATTTTAATTTTTTAAAAAT                                  |   |          |          |      |     |    |
| Cele.WB235  | Cele.WB235_2:12649559                                                  | 2 | 12649559 | 12650818 | 1260 | 83  | 15 |
| TCGTGGTGAG  | TCGTGGTGAGACCCA                                                        |   |          |          |      |     |    |
| Cele.WB235  | Cele.WB235_2:12649559                                                  | 2 | 12649559 | 12651613 | 2055 | 136 | 15 |
| TCGTGGTGAG  | TCGTGGTGAGACCCA                                                        |   |          |          |      |     |    |
| Cele.WB235  | Cele.WB235_2:12701130                                                  | 2 | 12701130 | 12701355 | 226  | 7   | 11 |
| CTACAGTACC  | CTACAGTACTC                                                            |   |          |          |      |     |    |
| Cele.WB235  | Cele.WB235_2:12719695                                                  | 2 | 12719695 | 12719880 | 186  | 5   | 43 |
| TATTTTCATT  | TATTTTCATTTTCGGCAAATTGCCGGTTTGCCGATTTGCCGGG                            |   |          |          |      |     |    |
| Cele.WB235  | Cele.WB235_2:12749754                                                  | 2 | 12749754 | 12749935 | 182  | 4   | 45 |
| ATCTGATCCT  | ATCTGATCCTTCAGCTCCGAAGGATCAGAAGGGTACCTCCTGGTG                          |   |          |          |      |     |    |
| Cele.WB235  | Cele.WB235_2:12757809                                                  | 2 | 12757809 | 12758089 | 281  | 8   | 35 |
| ATTTCAGGCA  | ATTTCAGGCAATTTACCGATTTGCCAGAAATGTTTC                                   |   |          |          |      |     |    |
| Cele.WB235  | Cele.WB235_2:12757828                                                  | 2 | 12757828 | 12758945 | 1118 | 16  | 35 |
| TTTGCCGGAA  | TTTGCCAGAAATGTTTCATTTCCGGCAATTTGTCTGA                                  |   |          |          |      |     |    |
| Cele.WB235  | Cele.WB235_2:12761888                                                  | 2 | 12761888 | 12762610 | 723  | 9   | 14 |
| AACTACAAAC  | AACTATAAACTACA                                                         |   |          |          |      |     |    |
| Cele.WB235  | Cele.WB235_2:12763248                                                  | 2 | 12763248 | 12763368 | 121  | 7   | 15 |
| ATTTCCGGAT  | ATTTCCGGATCTATG                                                        |   |          |          |      |     |    |
| Cele.WB235  | Cele.WB235_2:12770724                                                  | 2 | 12770724 | 12771186 | 463  | 10  | 35 |
| TCAATTCGGG  | TCAATTCGGCAATTTTTTGGATTTGCCGGAATTT                                     |   |          |          |      |     |    |
| Cele.WB235  | Cele.WB235_2:12795532                                                  | 2 | 12795532 | 12795808 | 277  | 8   | 35 |
| TGTGTAATAA  | TGTGTAATAATAAAATATCACTTTTTTTTCAGGAT                                    |   |          |          |      |     |    |
| Cele.WB235  | Cele.WB235_2:12843822                                                  | 2 | 12843822 | 12844875 | 1054 | 39  | 27 |
| GTGGGAAGCC  | GTGGGAAGCCACAGAGGTAAAAATATA                                            |   |          |          |      |     |    |
| Cele.WB235  | Cele.WB235_2:12844903                                                  | 2 | 12844903 | 12846136 | 1234 | 49  | 25 |
| GGCTTCCCAC  | GGCTTCCCACATATTTTACTCTCT                                               |   |          |          |      |     |    |

|                                                                                                                                       |                                                                                                |   |          |          |      |    |     |
|---------------------------------------------------------------------------------------------------------------------------------------|------------------------------------------------------------------------------------------------|---|----------|----------|------|----|-----|
| Cele.WB235                                                                                                                            | Cele.WB235_2:12889260                                                                          | 2 | 12889260 | 12889656 | 397  | 21 | 18  |
| ACTACTGTAT                                                                                                                            | ACTACTGTATCTCAGGGG                                                                             |   |          |          |      |    |     |
| Cele.WB235                                                                                                                            | Cele.WB235_2:12905369                                                                          | 2 | 12905369 | 12905758 | 390  | 5  | 43  |
| GATTTGCCGG                                                                                                                            | GATTTGCCGAAATTTTCAATCCCGCAAATTGCAGGTTCCGCC                                                     |   |          |          |      |    |     |
| Cele.WB235                                                                                                                            | Cele.WB235_2:12942997                                                                          | 2 | 12942997 | 12943139 | 143  | 5  | 18  |
| CCTAAGCCTA                                                                                                                            | CCTGAGCCTAAGCTCAAC                                                                             |   |          |          |      |    |     |
| Cele.WB235                                                                                                                            | Cele.WB235_2:12951422                                                                          | 2 | 12951422 | 12951594 | 173  | 4  | 43  |
| CGGCAAATTA                                                                                                                            | CGGCAAATTACCAATTTGCCGATTGCGCGAAATTTTCATTTT                                                     |   |          |          |      |    |     |
| Cele.WB235                                                                                                                            | Cele.WB235_2:12978404                                                                          | 2 | 12978404 | 12978548 | 145  | 9  | 16  |
| GCCTACATGC                                                                                                                            | GCCTACATGCCTACAT                                                                               |   |          |          |      |    |     |
| Cele.WB235                                                                                                                            | Cele.WB235_2:12979640                                                                          | 2 | 12979640 | 12979790 | 151  | 4  | 30  |
| TTCAGGCAGG                                                                                                                            | TTCAGGCAGGCATATGTCACATCGAATGTA                                                                 |   |          |          |      |    |     |
| Cele.WB235                                                                                                                            | Cele.WB235_2:13007141                                                                          | 2 | 13007141 | 13007285 | 145  | 6  | 19  |
| TATGGTGCAT                                                                                                                            | TATGGTGCATCTGACAAGT                                                                            |   |          |          |      |    |     |
| Cele.WB235                                                                                                                            | Cele.WB235_2:13037761                                                                          | 2 | 13037761 | 13037897 | 137  | 4  | 34  |
| TTCAATTCCG                                                                                                                            | TTCAATTCGGCAATTTCCCGATTGCGCGAAAT                                                               |   |          |          |      |    |     |
| Cele.WB235                                                                                                                            | Cele.WB235_2:13061749                                                                          | 2 | 13061749 | 13061893 | 145  | 8  | 16  |
| TAGGCACGTA                                                                                                                            | TAGGTACGTAGGCACA                                                                               |   |          |          |      |    |     |
| Cele.WB235                                                                                                                            | Cele.WB235_2:13184130                                                                          | 2 | 13184130 | 13184277 | 148  | 7  | 21  |
| AATCTAGCCA                                                                                                                            | AATCTAGCCAGACGCACACCT                                                                          |   |          |          |      |    |     |
| Cele.WB235                                                                                                                            | Cele.WB235_2:13243398                                                                          | 2 | 13243398 | 13244452 | 1055 | 6  | 165 |
| AAAATTC AAT                                                                                                                           |                                                                                                |   |          |          |      |    |     |
| AAAATTCGATTTTGGACTTATCTATTCTCTCTTTTTTATAACATGTATTTTCAGTTGATAGAGGACTCAA AATTATAATGCTCGTAATTATTTATAAGTGTGTGTGTCTCAGAATCAATTCTAAAAACAGAT |                                                                                                |   |          |          |      |    |     |
| TTTTTTTTGAAAGTTTAAGTAATATCCGCGGAG                                                                                                     |                                                                                                |   |          |          |      |    |     |
| Cele.WB235                                                                                                                            | Cele.WB235_2:13281689                                                                          | 2 | 13281689 | 13282092 | 404  | 10 | 31  |
| CACGCCTATT                                                                                                                            | CACGCCTATTTGTGGGAGGAGTCTACAAGC                                                                 |   |          |          |      |    |     |
| Cele.WB235                                                                                                                            | Cele.WB235_2:13284530                                                                          | 2 | 13284530 | 13285104 | 575  | 12 | 48  |
| TGCCTACGTG                                                                                                                            | TGCCTACGTGCCTACATAAGAAGCGTAGGCTTCAAAGGTGTTGCG                                                  |   |          |          |      |    |     |
| Cele.WB235                                                                                                                            | Cele.WB235_2:13303475                                                                          | 2 | 13303475 | 13303853 | 379  | 13 | 14  |
| TAGTTTGTAG                                                                                                                            | TAGTTTGTAGTTTG                                                                                 |   |          |          |      |    |     |
| Cele.WB235                                                                                                                            | Cele.WB235_2:13304324                                                                          | 2 | 13304324 | 13304580 | 257  | 15 | 16  |
| GGCATGTAGG                                                                                                                            | GGCATGTAGGCAGGTA                                                                               |   |          |          |      |    |     |
| Cele.WB235                                                                                                                            | Cele.WB235_2:13310035                                                                          | 2 | 13310035 | 13310356 | 322  | 20 | 16  |
| GGCATGTAGG                                                                                                                            | GGCATGTAGGTAGGTA                                                                               |   |          |          |      |    |     |
| Cele.WB235                                                                                                                            | Cele.WB235_2:13318641                                                                          | 2 | 13318641 | 13320189 | 1549 | 49 | 20  |
| TTTGAATTTT                                                                                                                            | TTTGAATTTTTTAAGCCAAAA                                                                          |   |          |          |      |    |     |
| Cele.WB235                                                                                                                            | Cele.WB235_2:13334193                                                                          | 2 | 13334193 | 13334831 | 639  | 5  | 122 |
| GATCTACAAA                                                                                                                            |                                                                                                |   |          |          |      |    |     |
| GATCTACAAAAACGCGGGAAAAGTGACGCAGAGTTTTGAACTGATTTTGCATAAAAAATCCCGCATTTTTTGTAGATCAAACCGTTATGGGACAGCCTGGTGCCACGTGCTTGATCTACGCA            |                                                                                                |   |          |          |      |    |     |
| Cele.WB235                                                                                                                            | Cele.WB235_2:13342774                                                                          | 2 | 13342774 | 13342879 | 106  | 5  | 21  |
| CTAGAAAAAC                                                                                                                            | CTAGAAAAACTCGGCCATCAA                                                                          |   |          |          |      |    |     |
| Cele.WB235                                                                                                                            | Cele.WB235_2:13343764                                                                          | 2 | 13343764 | 13344901 | 1138 | 46 | 21  |
| TTTCTAGTT                                                                                                                             | TTTCTAGTTGATAGCCGAGT                                                                           |   |          |          |      |    |     |
| Cele.WB235                                                                                                                            | Cele.WB235_2:13353644                                                                          | 2 | 13353644 | 13353730 | 87   | 6  | 12  |
| CTTAGGCTTA                                                                                                                            | CTTAGGCTTAGT                                                                                   |   |          |          |      |    |     |
| Cele.WB235                                                                                                                            | Cele.WB235_2:13372106                                                                          | 2 | 13372106 | 13372150 | 45   | 4  | 11  |
| TGGA AATTG                                                                                                                            | TGGA AATTGA                                                                                    |   |          |          |      |    |     |
| Cele.WB235                                                                                                                            | Cele.WB235_2:13385641                                                                          | 2 | 13385641 | 13386400 | 760  | 8  | 95  |
| GGCCTGCGGC                                                                                                                            | GGCCTGCGGCCTCAAACCTGGTTGGTAGGCTTGAGCGAATAACAATCTGCTTGGAATAGGATTAAAGCTGGCCCTTATTTTTCATGAGTATTCA |   |          |          |      |    |     |
| Cele.WB235                                                                                                                            | Cele.WB235_2:13394857                                                                          | 2 | 13394857 | 13395660 | 804  | 20 | 35  |
| GATTTGCCGG                                                                                                                            | GATTTGCCGGAATGTTCAATTCGGCAATTTACT                                                              |   |          |          |      |    |     |



|            |                                              |   |          |          |      |    |    |
|------------|----------------------------------------------|---|----------|----------|------|----|----|
| Cele.WB235 | Cele.WB235_2:13415355                        | 2 | 13415355 | 13415629 | 275  | 20 | 11 |
| CCTACAGTAC | CCTATAGTACC                                  |   |          |          |      |    |    |
| Cele.WB235 | Cele.WB235_2:13422904                        | 2 | 13422904 | 13423919 | 1016 | 29 | 35 |
| GAATTTTGA  | GAGTTTTTGATTTTCGGCAATTTGCCAATTTGCCA          |   |          |          |      |    |    |
| Cele.WB235 | Cele.WB235_2:13502158                        | 2 | 13502158 | 13503434 | 1277 | 26 | 27 |
| AGCAGCCGAC | AGCAGCCGACGCCTTGCGGGTCGCTCA                  |   |          |          |      |    |    |
| Cele.WB235 | Cele.WB235_2:13507307                        | 2 | 13507307 | 13507403 | 97   | 6  | 16 |
| ACATGCCTAC | ACATGCCTACATGCCT                             |   |          |          |      |    |    |
| Cele.WB235 | Cele.WB235_2:13522160                        | 2 | 13522160 | 13522220 | 61   | 5  | 12 |
| AATACCAACC | AATACCAACCAC                                 |   |          |          |      |    |    |
| Cele.WB235 | Cele.WB235_2:13528439                        | 2 | 13528439 | 13528985 | 547  | 24 | 20 |
| GTAAATCGAC | GTAAATCGACAAAAGACATC                         |   |          |          |      |    |    |
| Cele.WB235 | Cele.WB235_2:13598247                        | 2 | 13598247 | 13598526 | 280  | 7  | 35 |
| TTGCCGGAAT | TTGCCGGAATTGAATATTTGCGGCAATCTGTAAAT          |   |          |          |      |    |    |
| Cele.WB235 | Cele.WB235_2:13598710                        | 2 | 13598710 | 13599880 | 1171 | 26 | 45 |
| ACCAGGAGGT | ACCAGGAGGTACCCTTCTATCCTTCGGAGCTGAATGATCAGATT |   |          |          |      |    |    |
| Cele.WB235 | Cele.WB235_2:13631132                        | 2 | 13631132 | 13631348 | 217  | 13 | 16 |
| ACATGCCTAC | ACATGCCTACTTACCT                             |   |          |          |      |    |    |
| Cele.WB235 | Cele.WB235_2:13642102                        | 2 | 13642102 | 13642382 | 281  | 7  | 35 |
| CTTGCCGATT | CTTGCCGATTTTTCAGAAATTTTCAATTCCGGCAA          |   |          |          |      |    |    |
| Cele.WB235 | Cele.WB235_2:13650128                        | 2 | 13650128 | 13650200 | 73   | 6  | 12 |
| TAGGCTTAGG | TAGGCTTAGGCT                                 |   |          |          |      |    |    |
| Cele.WB235 | Cele.WB235_2:13668387                        | 2 | 13668387 | 13668731 | 345  | 12 | 27 |
| TTCCGGCAAA | TTCCGGCAAAATCGGCAATTTGAAAAAT                 |   |          |          |      |    |    |
| Cele.WB235 | Cele.WB235_2:13681580                        | 2 | 13681580 | 13681759 | 180  | 5  | 36 |
| TTGCCTAAAA | TTGCCTAAAAATTAAAAATTTCCGGCAAAATCAGCAAAT      |   |          |          |      |    |    |
| Cele.WB235 | Cele.WB235_2:13715389                        | 2 | 13715389 | 13715533 | 145  | 10 | 12 |
| GCCTAAGCCT | GCCGAAGCCTAA                                 |   |          |          |      |    |    |
| Cele.WB235 | Cele.WB235_2:13737396                        | 2 | 13737396 | 13737775 | 380  | 15 | 21 |
| CTCGTAAATC | CTCGTAGATCGACAAGAAGCTC                       |   |          |          |      |    |    |
| Cele.WB235 | Cele.WB235_2:13740296                        | 2 | 13740296 | 13741317 | 1022 | 28 | 35 |
| TTTGCCGGAA | TTTGCCGGAAATTTTGAATATTGGCATATTGCCGA          |   |          |          |      |    |    |
| Cele.WB235 | Cele.WB235_2:13761268                        | 2 | 13761268 | 13762971 | 1704 | 50 | 35 |
| CCGGAATTGA | CCGGAATTGAAAAATTTCTGGAAAAATCGGCAAATG         |   |          |          |      |    |    |
| Cele.WB235 | Cele.WB235_2:13790809                        | 2 | 13790809 | 13791073 | 265  | 22 | 10 |
| CCGCTACCGC | CCGCTACCGC                                   |   |          |          |      |    |    |
| Cele.WB235 | Cele.WB235_2:13795316                        | 2 | 13795316 | 13795382 | 67   | 5  | 11 |
| CCGCTACCGC | CCGCTACCGCA                                  |   |          |          |      |    |    |
| Cele.WB235 | Cele.WB235_2:13796378                        | 2 | 13796378 | 13796708 | 331  | 23 | 12 |
| GCCTAAGCCT | GCCTAAGCCTAA                                 |   |          |          |      |    |    |
| Cele.WB235 | Cele.WB235_2:13799836                        | 2 | 13799836 | 13800686 | 851  | 47 | 18 |
| AATTTACCAA | AATTTACCAATTTACCAA                           |   |          |          |      |    |    |
| Cele.WB235 | Cele.WB235_2:13806123                        | 2 | 13806123 | 13806285 | 163  | 10 | 12 |
| GCCTAAGCCT | GCCTAAGCCTTA                                 |   |          |          |      |    |    |
| Cele.WB235 | Cele.WB235_2:13809662                        | 2 | 13809662 | 13809758 | 97   | 7  | 12 |
| TTAGGCTTAG | TTTCGGCTTAGGA                                |   |          |          |      |    |    |
| Cele.WB235 | Cele.WB235_2:13831950                        | 2 | 13831950 | 13832774 | 825  | 18 | 34 |
| AATTCGGCA  | AATTCGGCAATTTGCTGATTTCATCAGAAATTTTC          |   |          |          |      |    |    |
| Cele.WB235 | Cele.WB235_2:13906504                        | 2 | 13906504 | 13906669 | 166  | 5  | 33 |
| AAAATTTGAA | AAAATTTGAATTTCCCGTCAAAATTTTCTCAG             |   |          |          |      |    |    |
| Cele.WB235 | Cele.WB235_2:13934639                        | 2 | 13934639 | 13934753 | 115  | 7  | 12 |
| AGCCTAAGCC | ACCTAAGCCTAC                                 |   |          |          |      |    |    |

|            |                                                                |   |          |          |      |    |     |
|------------|----------------------------------------------------------------|---|----------|----------|------|----|-----|
| Cele.WB235 | Cele.WB235_2:13962702                                          | 2 | 13962702 | 13964354 | 1653 | 47 | 14  |
| TACAAACTAC | TACAAACTACAAAC                                                 |   |          |          |      |    |     |
| Cele.WB235 | Cele.WB235_2:13967824                                          | 2 | 13967824 | 13968381 | 558  | 7  | 62  |
| TGCTAACTAG | TGCTAACTAGCGCGGGCCTGCTTAGGTGCCGGCTGCGAAAGCAGTCCTGGTTTAATGTCGGC |   |          |          |      |    |     |
| Cele.WB235 | Cele.WB235_2:13974189                                          | 2 | 13974189 | 13974267 | 79   | 6  | 12  |
| GGCTTTGGCT | GGCTTTGGCTTT                                                   |   |          |          |      |    |     |
| Cele.WB235 | Cele.WB235_2:13974202                                          | 2 | 13974202 | 13974430 | 229  | 14 | 12  |
| GCTTAGGCTT | GCTTCGGCTTTG                                                   |   |          |          |      |    |     |
| Cele.WB235 | Cele.WB235_2:13989510                                          | 2 | 13989510 | 13989877 | 368  | 11 | 11  |
| GTACTGTAGG | GTACTGTAGGA                                                    |   |          |          |      |    |     |
| Cele.WB235 | Cele.WB235_2:13990069                                          | 2 | 13990069 | 13990966 | 898  | 30 | 30  |
| TTTCTAGAAA | TTTCTAGAAAAATCAGAAAACCTTTTGGAAC                                |   |          |          |      |    |     |
| Cele.WB235 | Cele.WB235_2:14006143                                          | 2 | 14006143 | 14006320 | 178  | 5  | 14  |
| GTAGTTTGTA | GTAGTTTGTTAGTTT                                                |   |          |          |      |    |     |
| Cele.WB235 | Cele.WB235_2:14006879                                          | 2 | 14006879 | 14006969 | 91   | 5  | 12  |
| TAGGCTTAGG | TAGGCTTAGGCT                                                   |   |          |          |      |    |     |
| Cele.WB235 | Cele.WB235_2:14023987                                          | 2 | 14023987 | 14024052 | 66   | 4  | 12  |
| TAGGCTTAGG | TAGGCTTAGGCT                                                   |   |          |          |      |    |     |
| Cele.WB235 | Cele.WB235_2:14100395                                          | 2 | 14100395 | 14100701 | 307  | 8  | 34  |
| CCGTGCCTAC | CCGTGCCTACTAACCTACCGACCTTGCTGCCTC                              |   |          |          |      |    |     |
| Cele.WB235 | Cele.WB235_2:14105236                                          | 2 | 14105236 | 14105489 | 254  | 11 | 18  |
| CTAGGTGCCT | CTAGGTACCTATCCATTC                                             |   |          |          |      |    |     |
| Cele.WB235 | Cele.WB235_2:14108714                                          | 2 | 14108714 | 14108890 | 177  | 10 | 16  |
| TAGGCATATA | TAGGCATATAGGCTTA                                               |   |          |          |      |    |     |
| Cele.WB235 | Cele.WB235_2:14114648                                          | 2 | 14114648 | 14115030 | 383  | 12 | 22  |
| CTACAGTAAC | CTACAGTAACCCTAGTTTGGAA                                         |   |          |          |      |    |     |
| Cele.WB235 | Cele.WB235_2:14130915                                          | 2 | 14130915 | 14131087 | 173  | 4  | 43  |
| GAAACTAGG  | GAAACTAGGCCACAGAGTTGAGTTGACGGCCTAGAAATCTA                      |   |          |          |      |    |     |
| Cele.WB235 | Cele.WB235_2:14137014                                          | 2 | 14137014 | 14137524 | 511  | 14 | 34  |
| CGGAATTGAA | CGGAATTGAAATTTCCGGCAAATTGGTAAATGC                              |   |          |          |      |    |     |
| Cele.WB235 | Cele.WB235_2:14166594                                          | 2 | 14166594 | 14166830 | 237  | 18 | 12  |
| ATAGGCATAG | ATAGGCATAGAC                                                   |   |          |          |      |    |     |
| Cele.WB235 | Cele.WB235_2:14190380                                          | 2 | 14190380 | 14191034 | 655  | 13 | 13  |
| TATACAAAAA | TATACAAAAATA                                                   |   |          |          |      |    |     |
| Cele.WB235 | Cele.WB235_2:14192423                                          | 2 | 14192423 | 14193096 | 674  | 16 | 42  |
| AAAACCGGCA | AAAACCGGCAATTGCTGGAATTGCCGATTGCCGAATATTACC                     |   |          |          |      |    |     |
| Cele.WB235 | Cele.WB235_2:14212202                                          | 2 | 14212202 | 14212432 | 231  | 10 | 21  |
| CAATTTTCTG | CAATTTTCTGTCAGACTTTGA                                          |   |          |          |      |    |     |
| Cele.WB235 | Cele.WB235_2:14239112                                          | 2 | 14239112 | 14239812 | 701  | 18 | 35  |
| GCAAATCGGC | GCAAATCGGCAAGTTGCCGGAATTGAAAATTTTCAG                           |   |          |          |      |    |     |
| Cele.WB235 | Cele.WB235_2:14264215                                          | 2 | 14264215 | 14264530 | 316  | 8  | 35  |
| CGGCAAATCG | CGGCAAATCGGCAAATTGCCGGAATTGTTAATTTTC                           |   |          |          |      |    |     |
| Cele.WB235 | Cele.WB235_2:14269513                                          | 2 | 14269513 | 14269895 | 383  | 11 | 35  |
| CCGGCAAATC | CCGGCAAATGGGCAAATTGCCGAAAATGAAAGCAT                            |   |          |          |      |    |     |
| Cele.WB235 | Cele.WB235_2:14273310                                          | 2 | 14273310 | 14273525 | 216  | 5  | 35  |
| CGGCAAATTG | CGGCAAATCGGCTAATTGCCGAAATTGAAAAATTTTC                          |   |          |          |      |    |     |
| Cele.WB235 | Cele.WB235_2:14274983                                          | 2 | 14274983 | 14275913 | 931  | 26 | 32  |
| AACCAATCAG | AACCAATCAGCGATGGGCTCCACCCTTTTGA                                |   |          |          |      |    |     |
| Cele.WB235 | Cele.WB235_2:14278881                                          | 2 | 14278881 | 14279293 | 413  | 12 | 35  |
| GCCGGAAATT | GCCGGAAATTTCCAATTCGCCCAATTTGCCGATTT                            |   |          |          |      |    |     |
| Cele.WB235 | Cele.WB235_2:14323963                                          | 2 | 14323963 | 14331913 | 7951 | 43 | 185 |
| CTCGGACATA |                                                                |   |          |          |      |    |     |

|                                                                                                                                        |                                     |   |          |          |      |        |
|----------------------------------------------------------------------------------------------------------------------------------------|-------------------------------------|---|----------|----------|------|--------|
| CTCGGACATAATTGGTGTCTGTATTCACCTTATGATACGTTCGGCTGCGTACATTGGCCAAGAGTGTTCAGTAAGAGAATTTTCATTTAGAATATGAACAATTTGGGTAATTGGAAAGTGTCTTCGGAATCTT  |                                     |   |          |          |      |        |
| TTATACATCCGACAAATTCGAGTATGTTAGTATTCTGAATTGGATTCTTTTT                                                                                   |                                     |   |          |          |      |        |
| Cele.WB235                                                                                                                             | Cele.WB235_2:14333431               | 2 | 14333431 | 14337579 | 4149 | 25 166 |
| TCGTAATTAT                                                                                                                             |                                     |   |          |          |      |        |
| TCGTAATTATTCATAAGTTTGTGTTGTCTCCGAGCCATGTCTGAAAAACAGATTTTTTTTCGAAAAATTTAAAAAGTTCGTAATAATTGGATTTTTGACAAATCTATGCTCTCTTTTTTGTGTTTAAAAATTTA |                                     |   |          |          |      |        |
| GTTTCAGTGACATACAATTTCAAAAATATAATGT                                                                                                     |                                     |   |          |          |      |        |
| Cele.WB235                                                                                                                             | Cele.WB235_2:14337687               | 2 | 14337687 | 14339240 | 1554 | 57 27  |
| GGCTTCCCAC                                                                                                                             | GGCTTCCCACCATATTTTACTCTCTGT         |   |          |          |      |        |
| Cele.WB235                                                                                                                             | Cele.WB235_2:14346267               | 2 | 14346267 | 14346344 | 78   | 5 15   |
| CGAAAAGGGG                                                                                                                             | CGAAAAGGGGATCTG                     |   |          |          |      |        |
| Cele.WB235                                                                                                                             | Cele.WB235_2:14346519               | 2 | 14346519 | 14346611 | 93   | 6 15   |
| TCCCCTTTTC                                                                                                                             | TCCCCTTTTCGTATC                     |   |          |          |      |        |
| Cele.WB235                                                                                                                             | Cele.WB235_2:14355352               | 2 | 14355352 | 14355470 | 119  | 5 18   |
| TAGTCTTGCA                                                                                                                             | TAGTCTTGCAAGCTCTAT                  |   |          |          |      |        |
| Cele.WB235                                                                                                                             | Cele.WB235_2:14738853               | 2 | 14738853 | 14738949 | 97   | 6 16   |
| GCAGTTTGCC                                                                                                                             | GCCGTTTGCCGAATTG                    |   |          |          |      |        |
| Cele.WB235                                                                                                                             | Cele.WB235_2:14780596               | 2 | 14780596 | 14780942 | 347  | 4 35   |
| TCCGGCAAAT                                                                                                                             | TCCGGCAAATCGGCAAATGGTGAAATTTAAATTT  |   |          |          |      |        |
| Cele.WB235                                                                                                                             | Cele.WB235_2:14802929               | 2 | 14802929 | 14803074 | 146  | 7 21   |
| ATTGGATTAG                                                                                                                             | ATTGGATTAGATTGTTCAT                 |   |          |          |      |        |
| Cele.WB235                                                                                                                             | Cele.WB235_2:14836506               | 2 | 14836506 | 14836646 | 141  | 5 30   |
| TTCTGGAAAA                                                                                                                             | TTCTGGAAAAATCTAGAAATGTTCCAGAACC     |   |          |          |      |        |
| Cele.WB235                                                                                                                             | Cele.WB235_2:14836705               | 2 | 14836705 | 14836840 | 136  | 9 15   |
| AGACCCATCG                                                                                                                             | AGACCCATCGTGGCG                     |   |          |          |      |        |
| Cele.WB235                                                                                                                             | Cele.WB235_2:14836894               | 2 | 14836894 | 14837772 | 879  | 25 35  |
| TTAAATTTTC                                                                                                                             | TTAAATTTTCTGTGAAAAATATTTTGGCGGAAAA  |   |          |          |      |        |
| Cele.WB235                                                                                                                             | Cele.WB235_2:14870141               | 2 | 14870141 | 14870668 | 528  | 13 35  |
| TTTCCGGCAA                                                                                                                             | TTTCCGGCAAATCGGCAAATGTTGGACTTGAAAA  |   |          |          |      |        |
| Cele.WB235                                                                                                                             | Cele.WB235_2:14878167               | 2 | 14878167 | 14878554 | 388  | 11 35  |
| CAGAAAATTT                                                                                                                             | CAGAAAATTTAAATTTCCCGCCAAAATATTTTCA  |   |          |          |      |        |
| Cele.WB235                                                                                                                             | Cele.WB235_2:14878607               | 2 | 14878607 | 14878727 | 121  | 7 15   |
| CCACGATGGG                                                                                                                             | CCACGATGGGTCTCA                     |   |          |          |      |        |
| Cele.WB235                                                                                                                             | Cele.WB235_2:14878787               | 2 | 14878787 | 14878927 | 141  | 5 30   |
| AATTTTCCAG                                                                                                                             | AATTTTCCAGAAAGTTCTGGAACATTCCAG      |   |          |          |      |        |
| Cele.WB235                                                                                                                             | Cele.WB235_2:14893703               | 2 | 14893703 | 14893787 | 85   | 6 12   |
| TTAGGCTTAG                                                                                                                             | TTAGGCTAAGGT                        |   |          |          |      |        |
| Cele.WB235                                                                                                                             | Cele.WB235_2:14955292               | 2 | 14955292 | 14955352 | 61   | 5 12   |
| AAGCCTAAGC                                                                                                                             | AAGCCCAAGCCT                        |   |          |          |      |        |
| Cele.WB235                                                                                                                             | Cele.WB235_2:14984666               | 2 | 14984666 | 14984990 | 325  | 14 20  |
| TTCAGTCAAA                                                                                                                             | TTCAGTCAAAAATTTAGATT                |   |          |          |      |        |
| Cele.WB235                                                                                                                             | Cele.WB235_2:14991646               | 2 | 14991646 | 14991736 | 91   | 6 15   |
| TCGTGGCGAG                                                                                                                             | TCGTGCGAGACCCT                      |   |          |          |      |        |
| Cele.WB235                                                                                                                             | Cele.WB235_2:14991755               | 2 | 14991755 | 14991977 | 223  | 7 32   |
| TTTTGGCGGG                                                                                                                             | TTTTGGCGGGAATTTAAATTTCTTTGAAATT     |   |          |          |      |        |
| Cele.WB235                                                                                                                             | Cele.WB235_2:14993591               | 2 | 14993591 | 14993681 | 91   | 6 15   |
| GGTGAGACCC                                                                                                                             | GGTGAGACCCCTCGT                     |   |          |          |      |        |
| Cele.WB235                                                                                                                             | Cele.WB235_2:14993697               | 2 | 14993697 | 14994076 | 380  | 11 34  |
| TTGGCGGGAA                                                                                                                             | TTGGCGGGAAATTCAAATTTTTCAGTGAAAAAATT |   |          |          |      |        |
| Cele.WB235                                                                                                                             | Cele.WB235_2:15000612               | 2 | 15000612 | 15000786 | 175  | 9 15   |
| AGACCCATCG                                                                                                                             | AGACCCATCGTGGCG                     |   |          |          |      |        |
| Cele.WB235                                                                                                                             | Cele.WB235_2:15000726               | 2 | 15000726 | 15000995 | 270  | 5 35   |
| ATTTTGGCGG                                                                                                                             | ATTTTGGCGGGTAATTTAAATATTCGAGAAAAAT  |   |          |          |      |        |

|                                                                                                                                      |                                        |   |          |          |      |    |     |
|--------------------------------------------------------------------------------------------------------------------------------------|----------------------------------------|---|----------|----------|------|----|-----|
| Cele.WB235                                                                                                                           | Cele.WB235_2:15044151                  | 2 | 15044151 | 15044326 | 176  | 5  | 35  |
| TTTGCCGGAA                                                                                                                           | TTTGCCGGAATTTTAAATTTCTGGCAATTTGCCGA    |   |          |          |      |    |     |
| Cele.WB235                                                                                                                           | Cele.WB235_2:15047976                  | 2 | 15047976 | 15048537 | 562  | 16 | 35  |
| TTTGCCGGAA                                                                                                                           | TTTGCCGGAAGTTTCAATTCAGGCAACTTGTCGT     |   |          |          |      |    |     |
| Cele.WB235                                                                                                                           | Cele.WB235_2:15111116                  | 2 | 15111116 | 15111396 | 281  | 8  | 35  |
| TTTGCCGGAA                                                                                                                           | TTTGCCGGAATTTTCAATTCGGCAATATACTGA      |   |          |          |      |    |     |
| Cele.WB235                                                                                                                           | Cele.WB235_2:15138506                  | 2 | 15138506 | 15140272 | 1767 | 38 | 15  |
| GGGTCTCACC                                                                                                                           | GGGTCTCACCACAAC                        |   |          |          |      |    |     |
| Cele.WB235                                                                                                                           | Cele.WB235_2:15186190                  | 2 | 15186190 | 15187654 | 1465 | 9  | 163 |
| AAATAAAAAA                                                                                                                           |                                        |   |          |          |      |    |     |
| AAATAAAAAAGAATGACTCCATATGATTTTCCCATACTTTTGAATTTTCGAAAAAATCAGCTTTTATATATTTTATCAACTTTTAAAAAAATACTTCCGTACAAGCTAATATACTCTGTTTGGCATTTTCTG |                                        |   |          |          |      |    |     |
| GTAACCTTTGACTATGCTGAACAGTTTATG                                                                                                       |                                        |   |          |          |      |    |     |
| Cele.WB235                                                                                                                           | Cele.WB235_2:15188581                  | 2 | 15188581 | 15189224 | 644  | 18 | 34  |
| TTTCAATTCC                                                                                                                           | TTTCAATTCGCGCAACTTTCCGATTTGGCGGAAA     |   |          |          |      |    |     |
| Cele.WB235                                                                                                                           | Cele.WB235_2:15194481                  | 2 | 15194481 | 15194561 | 81   | 4  | 20  |
| TGTAGATTTA                                                                                                                           | TGTAGATTTACGAAGGACAA                   |   |          |          |      |    |     |
| Cele.WB235                                                                                                                           | Cele.WB235_2:15210567                  | 2 | 15210567 | 15211143 | 577  | 12 | 35  |
| CCGATTTGCC                                                                                                                           | CCGATTTTCCGGAAATTTCGAATTCGCGCAACTTC    |   |          |          |      |    |     |
| Cele.WB235                                                                                                                           | Cele.WB235_2:15211519                  | 2 | 15211519 | 15211997 | 479  | 9  | 35  |
| TTGCCGGAAT                                                                                                                           | TTGCCGGAATTTGAAAAATTTCTGGCAAAACCGCCAAA |   |          |          |      |    |     |
| Cele.WB235                                                                                                                           | Cele.WB235_2:15278603                  | 2 | 15278603 | 15278843 | 241  | 12 | 23  |
| GCTACAGTAC                                                                                                                           | GCTACAGTACCCAGCTTGACTT                 |   |          |          |      |    |     |
| Cele.WB235                                                                                                                           | Cele.WB235_2:15279229                  | 2 | 15279229 | 15279409 | 181  | 15 | 12  |
| TTAGGCTTAG                                                                                                                           | TTAGGCTTAGGC                           |   |          |          |      |    |     |
| Cele.WB235                                                                                                                           | Cele.WB235_3:0                         | 3 | 0        | 119      | 120  | 10 | 12  |
| CCTAAGCCTA                                                                                                                           | CCTAAGCCTAAG                           |   |          |          |      |    |     |
| Cele.WB235                                                                                                                           | Cele.WB235_3:78610                     | 3 | 78610    | 79849    | 1240 | 39 | 31  |
| TAAATAATTA                                                                                                                           | TAAATAATTAGCAGACCAAAGTTGGGTCTGC        |   |          |          |      |    |     |
| Cele.WB235                                                                                                                           | Cele.WB235_3:80880                     | 3 | 80880    | 81257    | 378  | 14 | 21  |
| AAATTTGGCT                                                                                                                           | AAATTTGGCTGGAAATCGTGA                  |   |          |          |      |    |     |
| Cele.WB235                                                                                                                           | Cele.WB235_3:83578                     | 3 | 83578    | 83851    | 274  | 13 | 21  |
| CCATTTTAAG                                                                                                                           | CCATTTTAAGCCAATTTTGGA                  |   |          |          |      |    |     |
| Cele.WB235                                                                                                                           | Cele.WB235_3:83578                     | 3 | 83578    | 84096    | 519  | 25 | 21  |
| CCATTTTAAG                                                                                                                           | CCATTTTAAGCCAATTTTGGA                  |   |          |          |      |    |     |
| Cele.WB235                                                                                                                           | Cele.WB235_3:85304                     | 3 | 85304    | 85614    | 311  | 9  | 31  |
| TGCTAAATAA                                                                                                                           | TGCTAAATAATTAGCAGACCATTTTTGGGTC        |   |          |          |      |    |     |
| Cele.WB235                                                                                                                           | Cele.WB235_3:118094                    | 3 | 118094   | 118166   | 73   | 5  | 12  |
| GCCTAAGCCT                                                                                                                           | GCCTAAGCCTAA                           |   |          |          |      |    |     |
| Cele.WB235                                                                                                                           | Cele.WB235_3:133200                    | 3 | 133200   | 133804   | 605  | 7  | 34  |
| AATTCGCGCA                                                                                                                           | AATTCGCGCAATTTACCAATTTGCCAGAAATTTTC    |   |          |          |      |    |     |
| Cele.WB235                                                                                                                           | Cele.WB235_3:187630                    | 3 | 187630   | 188214   | 585  | 4  | 31  |
| TTAGCAGACC                                                                                                                           | TTAGCAGACCCAAGTATGGTCTGCTAATTAT        |   |          |          |      |    |     |
| Cele.WB235                                                                                                                           | Cele.WB235_3:189539                    | 3 | 189539   | 190145   | 607  | 5  | 31  |
| TTAGCAGACC                                                                                                                           | TTAGCAGACCCAAGTATGGTCTGCTAAATAA        |   |          |          |      |    |     |
| Cele.WB235                                                                                                                           | Cele.WB235_3:191259                    | 3 | 191259   | 191627   | 369  | 7  | 31  |
| GGTCTGCTAA                                                                                                                           | GGTCTGCTAAATATTTAGCATACCCAACCTTT       |   |          |          |      |    |     |
| Cele.WB235                                                                                                                           | Cele.WB235_3:193180                    | 3 | 193180   | 193459   | 280  | 9  | 31  |
| ACCCAAGTAT                                                                                                                           | ACCCAAGTATGGTCTGCTAATTATTTAGCAA        |   |          |          |      |    |     |
| Cele.WB235                                                                                                                           | Cele.WB235_3:206747                    | 3 | 206747   | 206867   | 121  | 7  | 16  |
| TAGGCATCTA                                                                                                                           | TAGGCATCTAGGCAGG                       |   |          |          |      |    |     |
| Cele.WB235                                                                                                                           | Cele.WB235_3:209292                    | 3 | 209292   | 209524   | 233  | 8  | 12  |
| AAGCCTAAGC                                                                                                                           | AAGACTAAGCCT                           |   |          |          |      |    |     |

|                                                                                                                                        |                                                                                                     |   |        |        |      |    |     |
|----------------------------------------------------------------------------------------------------------------------------------------|-----------------------------------------------------------------------------------------------------|---|--------|--------|------|----|-----|
| Cele.WB235                                                                                                                             | Cele.WB235_3:244458                                                                                 | 3 | 244458 | 244613 | 156  | 4  | 31  |
| AGCTCAAAAT                                                                                                                             | AGCTCAAAATCTGTAAAAATGCCCATTTTTG                                                                     |   |        |        |      |    |     |
| Cele.WB235                                                                                                                             | Cele.WB235_3:255029                                                                                 | 3 | 255029 | 255455 | 427  | 12 | 30  |
| TTTTTTGAGC                                                                                                                             | TGTTTTGAGCCAAAAATTCAAAAAATCTCG                                                                      |   |        |        |      |    |     |
| Cele.WB235                                                                                                                             | Cele.WB235_3:259921                                                                                 | 3 | 259921 | 260355 | 435  | 11 | 11  |
| CCTACAGTAC                                                                                                                             | CCTACAGTACA                                                                                         |   |        |        |      |    |     |
| Cele.WB235                                                                                                                             | Cele.WB235_3:267063                                                                                 | 3 | 267063 | 268369 | 1307 | 13 | 101 |
| GGTTACTGTA                                                                                                                             | GGTTACTGTAGTTCCAAAAGTACGCAAACTGACTACGGTTCCTAATACATCAGATATTACGACAAAAGTGCAGAAAATCGCTAAAAATGACTTTACTGG |   |        |        |      |    |     |
| Cele.WB235                                                                                                                             | Cele.WB235_3:334126                                                                                 | 3 | 334126 | 334653 | 528  | 17 | 31  |
| TGGTCTGCTA                                                                                                                             | TGGTCTGCTAAATAATTAGCATACCCAATT                                                                      |   |        |        |      |    |     |
| Cele.WB235                                                                                                                             | Cele.WB235_3:337086                                                                                 | 3 | 337086 | 337644 | 559  | 17 | 31  |
| TATGCTAAAT                                                                                                                             | TATGCTAAATATTTAGCAGACCAAAAAATAGG                                                                    |   |        |        |      |    |     |
| Cele.WB235                                                                                                                             | Cele.WB235_3:340719                                                                                 | 3 | 340719 | 342118 | 1400 | 23 | 31  |
| TTAGCAGACC                                                                                                                             | TTAGCAGACCCAAGGTTGGTCTGCTAAATAT                                                                     |   |        |        |      |    |     |
| Cele.WB235                                                                                                                             | Cele.WB235_3:345158                                                                                 | 3 | 345158 | 345375 | 218  | 7  | 31  |
| CTGCTAAATA                                                                                                                             | CTGCTAAATATTTAGCATACCAACTTTGGGT                                                                     |   |        |        |      |    |     |
| Cele.WB235                                                                                                                             | Cele.WB235_3:346580                                                                                 | 3 | 346580 | 346716 | 137  | 5  | 31  |
| AATATTTAGC                                                                                                                             | AATATTTAGCAGACCAAGATGGGTATGCTA                                                                      |   |        |        |      |    |     |
| Cele.WB235                                                                                                                             | Cele.WB235_3:404417                                                                                 | 3 | 404417 | 405141 | 725  | 7  | 40  |
| TCCACGTGGA                                                                                                                             | TCCACGTGGAATTTTTAGAAATTTCTCAAAAAAATTGAAA                                                            |   |        |        |      |    |     |
| Cele.WB235                                                                                                                             | Cele.WB235_3:410715                                                                                 | 3 | 410715 | 410901 | 187  | 6  | 31  |
| TTGGGTCTGC                                                                                                                             | TTGGGTCTGCTAAATATTTAGCAGACCATAA                                                                     |   |        |        |      |    |     |
| Cele.WB235                                                                                                                             | Cele.WB235_3:423133                                                                                 | 3 | 423133 | 423737 | 605  | 6  | 31  |
| TATTTAGCAG                                                                                                                             | TATTTAGCAGACCCAATTATGGTCTGCTAAT                                                                     |   |        |        |      |    |     |
| Cele.WB235                                                                                                                             | Cele.WB235_3:424806                                                                                 | 3 | 424806 | 426326 | 1521 | 38 | 40  |
| TAGAAAGTTC                                                                                                                             | TAGAAAGTTCGGAACATTCCAGAATTTCTCGATTTTTTC                                                             |   |        |        |      |    |     |
| Cele.WB235                                                                                                                             | Cele.WB235_3:424780                                                                                 | 3 | 424780 | 427345 | 2566 | 43 | 40  |
| ACATTCCAGA                                                                                                                             | ACATTCCAGAATTTTCTCGATTTTTCTAGAAAGTTCGGA                                                             |   |        |        |      |    |     |
| Cele.WB235                                                                                                                             | Cele.WB235_3:427473                                                                                 | 3 | 427473 | 427977 | 505  | 18 | 11  |
| CTACAGTACT                                                                                                                             | CTACAGTACTC                                                                                         |   |        |        |      |    |     |
| Cele.WB235                                                                                                                             | Cele.WB235_3:449837                                                                                 | 3 | 449837 | 453285 | 3449 | 21 | 164 |
| ATATAATGCT                                                                                                                             |                                                                                                     |   |        |        |      |    |     |
| ATATAATGCTCGTAATTATTAATAAATGTGTGTGTCTCAGAGCCACGTCTGAAAATACAGATTTTTTCTCGAAAAATTTCAAAAACTTTGTAGAAATTCGATTTTTTGACATAAGTGATCTCTCTTTTTTTCTG |                                                                                                     |   |        |        |      |    |     |
| ACATGTATTTTCAGTGACAACCTGTACTCGAAA                                                                                                      |                                                                                                     |   |        |        |      |    |     |
| Cele.WB235                                                                                                                             | Cele.WB235_3:470472                                                                                 | 3 | 470472 | 471505 | 1034 | 16 | 31  |
| TTTAGCAGAC                                                                                                                             | TTTAGCAGACCAAAGTTGGGTATGCTAAATA                                                                     |   |        |        |      |    |     |
| Cele.WB235                                                                                                                             | Cele.WB235_3:492131                                                                                 | 3 | 492131 | 493485 | 1355 | 34 | 31  |
| TTAGCAGACC                                                                                                                             | TTAGCAGACCAAAGATAGGTATGCTAAATAC                                                                     |   |        |        |      |    |     |
| Cele.WB235                                                                                                                             | Cele.WB235_3:498249                                                                                 | 3 | 498249 | 499054 | 806  | 26 | 31  |
| GGTCTGCTAA                                                                                                                             | GGTCTGCTAATTATTCAGCATACCCAATTT                                                                      |   |        |        |      |    |     |
| Cele.WB235                                                                                                                             | Cele.WB235_3:520005                                                                                 | 3 | 520005 | 520140 | 136  | 6  | 11  |
| CTACAGTACC                                                                                                                             | CTACAGTAACC                                                                                         |   |        |        |      |    |     |
| Cele.WB235                                                                                                                             | Cele.WB235_3:584894                                                                                 | 3 | 584894 | 585235 | 342  | 11 | 31  |
| GGTCTGCTAA                                                                                                                             | GGTCTGCTAATTATTTAGCATACCGAACTTC                                                                     |   |        |        |      |    |     |
| Cele.WB235                                                                                                                             | Cele.WB235_3:587989                                                                                 | 3 | 587989 | 588144 | 156  | 5  | 31  |
| TGGGTATGCT                                                                                                                             | TGGGTATGCTAAATAATTAGCAGACCAAAGT                                                                     |   |        |        |      |    |     |
| Cele.WB235                                                                                                                             | Cele.WB235_3:633852                                                                                 | 3 | 633852 | 634044 | 193  | 6  | 31  |
| TTAGCAGACC                                                                                                                             | TTAGCAGACTCATGGTAGGTATGCTAAATAT                                                                     |   |        |        |      |    |     |
| Cele.WB235                                                                                                                             | Cele.WB235_3:635824                                                                                 | 3 | 635824 | 635934 | 111  | 6  | 18  |
| TAGGCTTAGG                                                                                                                             | TAGTCTTAGGCTAACCTT                                                                                  |   |        |        |      |    |     |
| Cele.WB235                                                                                                                             | Cele.WB235_3:690245                                                                                 | 3 | 690245 | 690736 | 492  | 19 | 15  |
| TGAGACCCAT                                                                                                                             | TGAGACCAATCGTGA                                                                                     |   |        |        |      |    |     |

|             |                                                                                                   |   |         |         |      |     |    |
|-------------|---------------------------------------------------------------------------------------------------|---|---------|---------|------|-----|----|
| Cele.WB235  | Cele.WB235_3:700450                                                                               | 3 | 700450  | 700543  | 94   | 5   | 15 |
| GGGGGCAACA  | GGGGGCAACAAATTA                                                                                   |   |         |         |      |     |    |
| Cele.WB235  | Cele.WB235_3:705083                                                                               | 3 | 705083  | 705230  | 148  | 8   | 15 |
| TGTTGCCCCC  | TGTTGACCCCTATTA                                                                                   |   |         |         |      |     |    |
| Cele.WB235  | Cele.WB235_3:855590                                                                               | 3 | 855590  | 855838  | 249  | 7   | 31 |
| TAAATATTTA  | TAAATATTTAGTAGACCAAAGTTGGGTATGC                                                                   |   |         |         |      |     |    |
| Cele.WB235  | Cele.WB235_3:922387                                                                               | 3 | 922387  | 922734  | 348  | 8   | 18 |
| TGCAAGACTA  | TGCAAGACTATTAGAAGC                                                                                |   |         |         |      |     |    |
| Cele.WB235  | Cele.WB235_3:922819                                                                               | 3 | 922819  | 923128  | 310  | 5   | 18 |
| TAGTGCTGCA  | TAGTGCTGCAGTCTCTAT                                                                                |   |         |         |      |     |    |
| Cele.WB235  | Cele.WB235_3:931109                                                                               | 3 | 931109  | 931213  | 105  | 4   | 26 |
| CGGCCAGAGT  | CGGCCAGAGTCACTATATTTGGTGAA                                                                        |   |         |         |      |     |    |
| Cele.WB235  | Cele.WB235_3:931250                                                                               | 3 | 931250  | 931684  | 435  | 16  | 27 |
| AGAGAGTAAA  | AGAGAGTAAATATAGTGGGAAGCCAC                                                                        |   |         |         |      |     |    |
| Cele.WB235  | Cele.WB235_3:999373                                                                               | 3 | 999373  | 999632  | 260  | 12  | 22 |
| TAAATCTACA  | TAAATCTACACACTTGGCCTCG                                                                            |   |         |         |      |     |    |
| Cele.WB235  | Cele.WB235_3:1011046                                                                              | 3 | 1011046 | 1011124 | 79   | 5   | 16 |
| TTATAGTGTT  | TTATAGTGTTATAGTG                                                                                  |   |         |         |      |     |    |
| Cele.WB235  | Cele.WB235_3:1017334                                                                              | 3 | 1017334 | 1020579 | 3246 | 55  | 59 |
| TGTGCACTGG  | TGTGCACTGGTTTTCAAAAATTTTTTAACTGAGAATTATGGAAAAATATAAAATTTAAA                                       |   |         |         |      |     |    |
| Cele.WB235  | Cele.WB235_3:1052407                                                                              | 3 | 1052407 | 1052587 | 181  | 10  | 12 |
| AAGCCTAAGC  | AAGCCTAAGCCT                                                                                      |   |         |         |      |     |    |
| Cele.WB235  | Cele.WB235_3:1056939                                                                              | 3 | 1056939 | 1057667 | 729  | 14  | 40 |
| AAAAATCCACG | AAAAATCCACGTAGATTATCGATTTTTTCATAGAATTTTGCA                                                        |   |         |         |      |     |    |
| Cele.WB235  | Cele.WB235_3:1056932                                                                              | 3 | 1056932 | 1058332 | 1401 | 16  | 40 |
| TTTTGCAAAA  | TTTTGCAAAAATCCACGTAGATTATCGATTTTTTCATAGAA                                                         |   |         |         |      |     |    |
| Cele.WB235  | Cele.WB235_3:1119657                                                                              | 3 | 1119657 | 1120064 | 408  | 4   | 96 |
| GAGGGCCGCA  | GAGGGCCGCGAGCCCGAACACTCTTGGAAACTTTGGGCTGGCTTTGATCCTATTCTAAGCAGATATGTTATTTTACTCAAACCTAACAACAGGTTTC |   |         |         |      |     |    |
| Cele.WB235  | Cele.WB235_3:1148439                                                                              | 3 | 1148439 | 1149466 | 1028 | 13  | 35 |
| TTTAAATTTT  | TTTAAATTTTCCGGCAAATCGCCAAATTGCCGGAA                                                               |   |         |         |      |     |    |
| Cele.WB235  | Cele.WB235_3:1154872                                                                              | 3 | 1154872 | 1155214 | 343  | 4   | 21 |
| ACTACAGTAC  | ACTACAGTACCCCGTACGACT                                                                             |   |         |         |      |     |    |
| Cele.WB235  | Cele.WB235_3:1245524                                                                              | 3 | 1245524 | 1246875 | 1352 | 116 | 11 |
| TTTTTGACACA | TTTTTGACACAT                                                                                      |   |         |         |      |     |    |
| Cele.WB235  | Cele.WB235_3:1256230                                                                              | 3 | 1256230 | 1256326 | 97   | 5   | 12 |
| AGGCTTAGGC  | AGGCTTAGGCTC                                                                                      |   |         |         |      |     |    |
| Cele.WB235  | Cele.WB235_3:1260242                                                                              | 3 | 1260242 | 1261618 | 1377 | 70  | 20 |
| AAAAATAGAT  | AAAAATAGATTGACAGACGA                                                                              |   |         |         |      |     |    |
| Cele.WB235  | Cele.WB235_3:1264671                                                                              | 3 | 1264671 | 1264767 | 97   | 5   | 12 |
| AGGCTTAGGC  | AGGCTTAGGCTC                                                                                      |   |         |         |      |     |    |
| Cele.WB235  | Cele.WB235_3:1299759                                                                              | 3 | 1299759 | 1303117 | 3359 | 134 | 25 |
| CAGAGAGTAA  | CAGAGAGTAAAATAATTGGTGAAGC                                                                         |   |         |         |      |     |    |
| Cele.WB235  | Cele.WB235_3:1312388                                                                              | 3 | 1312388 | 1312777 | 390  | 16  | 21 |
| TTTTTGGTAA  | TTTTTGGTAAAATTTGATAAT                                                                             |   |         |         |      |     |    |
| Cele.WB235  | Cele.WB235_3:1314701                                                                              | 3 | 1314701 | 1315015 | 315  | 12  | 21 |
| CAAAAAGTTA  | CAAAAAGTTATCAAATTTTAC                                                                             |   |         |         |      |     |    |
| Cele.WB235  | Cele.WB235_3:1315590                                                                              | 3 | 1315590 | 1315824 | 235  | 5   | 35 |
| CAAATCGGCA  | CAAATCGACAAATTGCCGGAATTGAAAATTTCCGG                                                               |   |         |         |      |     |    |
| Cele.WB235  | Cele.WB235_3:1320466                                                                              | 3 | 1320466 | 1320612 | 147  | 5   | 11 |
| GTACTGTAGG  | GTACTGTAGGA                                                                                       |   |         |         |      |     |    |
| Cele.WB235  | Cele.WB235_3:1320777                                                                              | 3 | 1320777 | 1320837 | 61   | 4   | 15 |
| TCGTGGTGAG  | TCGTGGTGAGACCCA                                                                                   |   |         |         |      |     |    |

|            |                                                                                               |   |         |         |      |    |    |
|------------|-----------------------------------------------------------------------------------------------|---|---------|---------|------|----|----|
| Cele.WB235 | Cele.WB235_3:1320896                                                                          | 3 | 1320896 | 1321023 | 128  | 4  | 31 |
| AATTCAAATT | AATTCAAATTTATTTAAAAAATTTGGCGGG                                                                |   |         |         |      |    |    |
| Cele.WB235 | Cele.WB235_3:1326908                                                                          | 3 | 1326908 | 1327395 | 488  | 33 | 11 |
| GGTACTGTAG | GGTACTGTAGG                                                                                   |   |         |         |      |    |    |
| Cele.WB235 | Cele.WB235_3:1334409                                                                          | 3 | 1334409 | 1335297 | 889  | 40 | 14 |
| ATACCTAATA | ATACCTAATAACTA                                                                                |   |         |         |      |    |    |
| Cele.WB235 | Cele.WB235_3:1385873                                                                          | 3 | 1385873 | 1386532 | 660  | 5  | 43 |
| GGCTCTCGGC | GGCTCTCGGCTCGCGCCGAGGGCCGAGTTCCTACTAAAAGTTTC                                                  |   |         |         |      |    |    |
| Cele.WB235 | Cele.WB235_3:1534930                                                                          | 3 | 1534930 | 1535260 | 331  | 16 | 20 |
| CATAAAAATT | CATAAAAATTCGTGAAAAATG                                                                         |   |         |         |      |    |    |
| Cele.WB235 | Cele.WB235_3:1536002                                                                          | 3 | 1536002 | 1536441 | 440  | 21 | 20 |
| TTTCACTAAA | TTTCACTAAAAATCCTAATT                                                                          |   |         |         |      |    |    |
| Cele.WB235 | Cele.WB235_3:1560064                                                                          | 3 | 1560064 | 1560620 | 557  | 7  | 21 |
| CCTAAAAATT | CCTAAAAATTTCAATTTTGT                                                                          |   |         |         |      |    |    |
| Cele.WB235 | Cele.WB235_3:1608442                                                                          | 3 | 1608442 | 1609120 | 679  | 5  | 72 |
| ATGAATTTTA | ATGAATTTTAATACAATTTCTCTGACGATGAAGTCATAAAAATTCATTTTGTGACCTTTCAACTTTAGTTTT                      |   |         |         |      |    |    |
| Cele.WB235 | Cele.WB235_3:1633390                                                                          | 3 | 1633390 | 1634249 | 860  | 41 | 11 |
| TACTGTAGGG | TACTGTAGGGG                                                                                   |   |         |         |      |    |    |
| Cele.WB235 | Cele.WB235_3:1643024                                                                          | 3 | 1643024 | 1643390 | 367  | 4  | 92 |
| CTGCGGAACC | CTGCGGAACCCGAACGTGTCTGCGCCGCTTCCAAAAACAACCACCTCTTCACACTTCATTGCGCACACACCAAACCTACTAGTTTCACGTCAA |   |         |         |      |    |    |
| Cele.WB235 | Cele.WB235_3:1656487                                                                          | 3 | 1656487 | 1657087 | 601  | 50 | 12 |
| TGAGCCTGAG | TGAGCCTGAGCC                                                                                  |   |         |         |      |    |    |
| Cele.WB235 | Cele.WB235_3:1671460                                                                          | 3 | 1671460 | 1671581 | 122  | 11 | 11 |
| GCAAAAAATG | GCAAAAAATGT                                                                                   |   |         |         |      |    |    |
| Cele.WB235 | Cele.WB235_3:1714052                                                                          | 3 | 1714052 | 1714520 | 469  | 35 | 12 |
| CTAAGCCTAA | CTAAGCCTAACC                                                                                  |   |         |         |      |    |    |
| Cele.WB235 | Cele.WB235_3:1761961                                                                          | 3 | 1761961 | 1762051 | 91   | 6  | 12 |
| AGGCTTAGGC | AGGCTTAGGCTC                                                                                  |   |         |         |      |    |    |
| Cele.WB235 | Cele.WB235_3:1805381                                                                          | 3 | 1805381 | 1807736 | 2356 | 56 | 19 |
| AAAATCGATA | AAAATCGATATTTTATCGG                                                                           |   |         |         |      |    |    |
| Cele.WB235 | Cele.WB235_3:1809979                                                                          | 3 | 1809979 | 1810419 | 441  | 36 | 11 |
| ATTTTTTGCA | ATTTTTTGCAC                                                                                   |   |         |         |      |    |    |
| Cele.WB235 | Cele.WB235_3:1892229                                                                          | 3 | 1892229 | 1893089 | 861  | 44 | 19 |
| AAAATCGATA | AAAATCGATAATTCTCGG                                                                            |   |         |         |      |    |    |
| Cele.WB235 | Cele.WB235_3:1934627                                                                          | 3 | 1934627 | 1936118 | 1492 | 61 | 21 |
| TGGAAATTTT | TGGAAATTTTAGCCCAAAAAC                                                                         |   |         |         |      |    |    |
| Cele.WB235 | Cele.WB235_3:1964229                                                                          | 3 | 1964229 | 1964835 | 607  | 30 | 12 |
| TAGGCTTAGG | TAGGCTTAGGCT                                                                                  |   |         |         |      |    |    |
| Cele.WB235 | Cele.WB235_3:1976102                                                                          | 3 | 1976102 | 1976245 | 144  | 11 | 11 |
| GTCGCGTTGC | GTCGCGATTGCG                                                                                  |   |         |         |      |    |    |
| Cele.WB235 | Cele.WB235_3:1985833                                                                          | 3 | 1985833 | 1986090 | 258  | 24 | 11 |
| TGTGCAAAAA | TGTGCAAAAAA                                                                                   |   |         |         |      |    |    |
| Cele.WB235 | Cele.WB235_3:2009666                                                                          | 3 | 2009666 | 2010596 | 931  | 27 | 31 |
| TGCGTCGGAA | TGCGTCGGAAATTTATTCGGATCATTGCCGG                                                               |   |         |         |      |    |    |
| Cele.WB235 | Cele.WB235_3:2011573                                                                          | 3 | 2011573 | 2012317 | 745  | 17 | 31 |
| TCCGATGCAT | TCCGATGCATTGCCGATAATTGCCACCTGGT                                                               |   |         |         |      |    |    |
| Cele.WB235 | Cele.WB235_3:2012861                                                                          | 3 | 2012861 | 2014349 | 1489 | 36 | 19 |
| TATCGATTTT | TATTGATTTTTTGCTAAAA                                                                           |   |         |         |      |    |    |
| Cele.WB235 | Cele.WB235_3:2035722                                                                          | 3 | 2035722 | 2035981 | 260  | 20 | 11 |
| CTACAGTACC | CTACAGTACTT                                                                                   |   |         |         |      |    |    |
| Cele.WB235 | Cele.WB235_3:2036337                                                                          | 3 | 2036337 | 2036525 | 189  | 9  | 20 |
| TGTAGATTTA | TGTGGATTTACAGGAATCTA                                                                          |   |         |         |      |    |    |

|                                                                                                                                          |                                               |   |         |         |      |     |     |
|------------------------------------------------------------------------------------------------------------------------------------------|-----------------------------------------------|---|---------|---------|------|-----|-----|
| Cele.WB235                                                                                                                               | Cele.WB235_3:2066729                          | 3 | 2066729 | 2067447 | 719  | 12  | 35  |
| TTTGCCGGAA                                                                                                                               | TTTGCCGGAAATTTTCAATTCCGACAATTTGCCGA           |   |         |         |      |     |     |
| Cele.WB235                                                                                                                               | Cele.WB235_3:2077634                          | 3 | 2077634 | 2082512 | 4879 | 29  | 168 |
| TTATTTTTTG                                                                                                                               |                                               |   |         |         |      |     |     |
| TTATTTTTTGTTTTTTGTGCCTACATATACCTGTTGAAATTGGAATTCAAGACAAAAACCCCTGTAGCGCTCTGAAATGGATATCTAGGTACAAAACTTACCAATAATATTTTAAACAATCTAGAATC         |                                               |   |         |         |      |     |     |
| CAAATCTATCAAAACATTTCCGGAATTCATAATG                                                                                                       |                                               |   |         |         |      |     |     |
| Cele.WB235                                                                                                                               | Cele.WB235_3:2103059                          | 3 | 2103059 | 2103647 | 589  | 25  | 21  |
| GCCTAAAAAC                                                                                                                               | GCATAAAAAACGTAAATTTTAG                        |   |         |         |      |     |     |
| Cele.WB235                                                                                                                               | Cele.WB235_3:2110682                          | 3 | 2110682 | 2111451 | 770  | 22  | 31  |
| ATTTCCCGCC                                                                                                                               | ATTTCCCGCCAAAAATATTTGAAAACTTGA                |   |         |         |      |     |     |
| Cele.WB235                                                                                                                               | Cele.WB235_3:2113231                          | 3 | 2113231 | 2114730 | 1500 | 39  | 39  |
| TTTTTGGCGG                                                                                                                               | TTTTTGGCGGAAATTTCAAAATTCAAATTTTTGAATAT        |   |         |         |      |     |     |
| Cele.WB235                                                                                                                               | Cele.WB235_3:2117069                          | 3 | 2117069 | 2117228 | 160  | 4   | 40  |
| TCCCGCCAAA                                                                                                                               | TCCCGCCAAAAATATTCAAAAATTTGAAATTTTGAATTT       |   |         |         |      |     |     |
| Cele.WB235                                                                                                                               | Cele.WB235_3:2218366                          | 3 | 2218366 | 2219198 | 833  | 23  | 32  |
| CTCAGCCAAT                                                                                                                               | CTCAGCCAATCAGCAATTAGCTCTGCCTATTT              |   |         |         |      |     |     |
| Cele.WB235                                                                                                                               | Cele.WB235_3:2235593                          | 3 | 2235593 | 2235697 | 105  | 5   | 21  |
| CTGACCAAAT                                                                                                                               | CTGACCAAATTTGTTTTAGCA                         |   |         |         |      |     |     |
| Cele.WB235                                                                                                                               | Cele.WB235_3:2245221                          | 3 | 2245221 | 2245452 | 232  | 9   | 21  |
| GTCAGTGCTG                                                                                                                               | GTCAGTGCTGTAACACATTTT                         |   |         |         |      |     |     |
| Cele.WB235                                                                                                                               | Cele.WB235_3:2455329                          | 3 | 2455329 | 2456409 | 1081 | 40  | 10  |
| AGGCAGGCTT                                                                                                                               | AGGCAGGCAT                                    |   |         |         |      |     |     |
| Cele.WB235                                                                                                                               | Cele.WB235_3:2456635                          | 3 | 2456635 | 2456707 | 73   | 5   | 12  |
| CCAAGCCCAA                                                                                                                               | CCAAGCCCAATC                                  |   |         |         |      |     |     |
| Cele.WB235                                                                                                                               | Cele.WB235_3:2470723                          | 3 | 2470723 | 2471262 | 540  | 27  | 20  |
| GACCCAGCCT                                                                                                                               | GACCCAGCCTACCCAGGCA                           |   |         |         |      |     |     |
| Cele.WB235                                                                                                                               | Cele.WB235_3:2470728                          | 3 | 2470728 | 2471526 | 799  | 40  | 20  |
| AGCCTACCCC                                                                                                                               | AGCCTACCCCAGGCAGACCC                          |   |         |         |      |     |     |
| Cele.WB235                                                                                                                               | Cele.WB235_3:2496715                          | 3 | 2496715 | 2496983 | 269  | 6   | 45  |
| TCTGATCCTT                                                                                                                               | TCTGATCCTTCAGCTCCGAAGGATCACATGGGTACCTTCTGATGT |   |         |         |      |     |     |
| Cele.WB235                                                                                                                               | Cele.WB235_3:2497037                          | 3 | 2497037 | 2501716 | 4680 | 187 | 25  |
| GTGAAGCCAG                                                                                                                               | GTGAAGCCAGAGAGTAAATATACG                      |   |         |         |      |     |     |
| Cele.WB235                                                                                                                               | Cele.WB235_3:2501737                          | 3 | 2501737 | 2501917 | 181  | 5   | 40  |
| TTCCAGAATT                                                                                                                               | TTCCAGAATTTTCCCGATTTTCTAGAAAGTTCTGGAACG       |   |         |         |      |     |     |
| Cele.WB235                                                                                                                               | Cele.WB235_3:2502140                          | 3 | 2502140 | 2502620 | 481  | 29  | 15  |
| GGTCTCACCA                                                                                                                               | GGTCTCACACGACG                                |   |         |         |      |     |     |
| Cele.WB235                                                                                                                               | Cele.WB235_3:2545690                          | 3 | 2545690 | 2546082 | 393  | 11  | 35  |
| TTTGCCGGAA                                                                                                                               | TTTGCCGGAAATTTTCAATTCCGGCAATTTGCCGA           |   |         |         |      |     |     |
| Cele.WB235                                                                                                                               | Cele.WB235_3:2791812                          | 3 | 2791812 | 2792160 | 349  | 10  | 35  |
| TTTGCCGGAA                                                                                                                               | TTTGCCGGAAAATTCAAATTCGGGCAATTTGCCGC           |   |         |         |      |     |     |
| Cele.WB235                                                                                                                               | Cele.WB235_3:2836362                          | 3 | 2836362 | 2837893 | 1532 | 45  | 19  |
| AAAATCGATA                                                                                                                               | AAAATTGATAATTTCCGGA                           |   |         |         |      |     |     |
| Cele.WB235                                                                                                                               | Cele.WB235_3:2977664                          | 3 | 2977664 | 2978383 | 720  | 4   | 180 |
| TGTCGGCCCGC                                                                                                                              |                                               |   |         |         |      |     |     |
| TGTCGGCCCGCTGTATCTTTTGCCCTCAATTTTTTTTAAATTTTCAAACATACATATTCCATTAGGTAACATTATGAGCTACAGTTTGTTAGTTGGAATTTTATTTCTAAAATTACTAGTTTCTGAGTTTATACTC |                                               |   |         |         |      |     |     |
| ATTTCAATATCCCCAAGTGAAATCGCCTAAAAATGAACTCGCGAGG                                                                                           |                                               |   |         |         |      |     |     |
| Cele.WB235                                                                                                                               | Cele.WB235_3:3018177                          | 3 | 3018177 | 3018907 | 731  | 5   | 16  |
| TGTATATATA                                                                                                                               | TGTATATATATATATA                              |   |         |         |      |     |     |
| Cele.WB235                                                                                                                               | Cele.WB235_3:3023864                          | 3 | 3023864 | 3024701 | 838  | 18  | 37  |
| ATTTTGGCGG                                                                                                                               | ATTTTGGCGGGATTTCAAATTTGAATTTTTTGAAAAAT        |   |         |         |      |     |     |
| Cele.WB235                                                                                                                               | Cele.WB235_3:3030347                          | 3 | 3030347 | 3030891 | 545  | 14  | 35  |
| AATTGCCGGA                                                                                                                               | AATTGCCGGAATTGAACTTTCCGGCAATTGGAA             |   |         |         |      |     |     |



|                                                                                                                                       |                                                                                                 |   |         |         |      |     |     |
|---------------------------------------------------------------------------------------------------------------------------------------|-------------------------------------------------------------------------------------------------|---|---------|---------|------|-----|-----|
| Cele.WB235                                                                                                                            | Cele.WB235_3:3037879                                                                            | 3 | 3037879 | 3038500 | 622  | 13  | 35  |
| AAATCGGCAA                                                                                                                            | AAATCGGAAATTTGCCGGAATTGAAAAATTTCCAGA                                                            |   |         |         |      |     |     |
| Cele.WB235                                                                                                                            | Cele.WB235_3:3042951                                                                            | 3 | 3042951 | 3043689 | 739  | 38  | 18  |
| GTCGATTTAC                                                                                                                            | GTCGATTTACGAGATTTT                                                                              |   |         |         |      |     |     |
| Cele.WB235                                                                                                                            | Cele.WB235_3:3078601                                                                            | 3 | 3078601 | 3079369 | 769  | 4   | 151 |
| TTTAAAGGCG                                                                                                                            |                                                                                                 |   |         |         |      |     |     |
| TTTAAAGGCGCATAGGTAGATCAAAACTCAAAGTTGGCGGATTCTAGTCAATATGGGGCTTATTTTAAAGCTCTCGGTAAGCTGAATGTAGTTTAGCTACTGAAAATTGAAAATTTAAACAATTTTTGGGTCT |                                                                                                 |   |         |         |      |     |     |
| AGCAGCGAAAATTTTCGAA                                                                                                                   |                                                                                                 |   |         |         |      |     |     |
| Cele.WB235                                                                                                                            | Cele.WB235_3:3085487                                                                            | 3 | 3085487 | 3086399 | 913  | 5   | 151 |
| TTTAAAGGCG                                                                                                                            |                                                                                                 |   |         |         |      |     |     |
| TTTAAAGGCGCATAGGTAGATCAAAACTCAAAGTTGGCGGATTCTAGTCAATATGGGGCTTATTTTAAAGCTCTCGGTAAGCTGAATGTAGTTTAGCTACTGACAATTGAAAATTTAAACAATTTTTGGGTCT |                                                                                                 |   |         |         |      |     |     |
| AGCAGCGAAAATTTTCGAA                                                                                                                   |                                                                                                 |   |         |         |      |     |     |
| Cele.WB235                                                                                                                            | Cele.WB235_3:3229003                                                                            | 3 | 3229003 | 3229241 | 239  | 7   | 30  |
| TAGAACTTTC                                                                                                                            | TAGAACTTTTTCAGTTTTTCTAGAAAACCTC                                                                 |   |         |         |      |     |     |
| Cele.WB235                                                                                                                            | Cele.WB235_3:3230816                                                                            | 3 | 3230816 | 3231055 | 240  | 8   | 30  |
| TAGAACTTTC                                                                                                                            | TAGAACTTTCCAAATTTCTCTAGAAAATTC                                                                  |   |         |         |      |     |     |
| Cele.WB235                                                                                                                            | Cele.WB235_3:3233988                                                                            | 3 | 3233988 | 3234755 | 768  | 13  | 19  |
| CTTGGCGCAA                                                                                                                            | CTTGGCGCAATTCTCGTGC                                                                             |   |         |         |      |     |     |
| Cele.WB235                                                                                                                            | Cele.WB235_3:3272813                                                                            | 3 | 3272813 | 3272897 | 85   | 4   | 21  |
| TCCAGCACTG                                                                                                                            | TCCAGCACTGACAAATTTTGT                                                                           |   |         |         |      |     |     |
| Cele.WB235                                                                                                                            | Cele.WB235_3:3334092                                                                            | 3 | 3334092 | 3334302 | 211  | 17  | 12  |
| AAAATAAAAA                                                                                                                            | AAAATAAAAAATA                                                                                   |   |         |         |      |     |     |
| Cele.WB235                                                                                                                            | Cele.WB235_3:3334358                                                                            | 3 | 3334358 | 3337083 | 2726 | 109 | 25  |
| ACTCTCTGGC                                                                                                                            | ACTCTCTGGCTTCCCACTATATTTT                                                                       |   |         |         |      |     |     |
| Cele.WB235                                                                                                                            | Cele.WB235_3:3346751                                                                            | 3 | 3346751 | 3346936 | 186  | 12  | 12  |
| TAGGCTTAGG                                                                                                                            | TAGGCTTAGGCT                                                                                    |   |         |         |      |     |     |
| Cele.WB235                                                                                                                            | Cele.WB235_3:3385070                                                                            | 3 | 3385070 | 3386871 | 1802 | 19  | 95  |
| TAATCCTATT                                                                                                                            | TAATCCTATTCCAAGCAGATTGTTATTCGCTCAAGCCTACAAACCAGGTTTGAGGGCCGCAGGCCCGAATACTCATGGAAACTGTGGGCCAGCTT |   |         |         |      |     |     |
| Cele.WB235                                                                                                                            | Cele.WB235_3:3446010                                                                            | 3 | 3446010 | 3446749 | 740  | 47  | 15  |
| GTGGTGAGAC                                                                                                                            | GTGGTGAGACCCGTC                                                                                 |   |         |         |      |     |     |
| Cele.WB235                                                                                                                            | Cele.WB235_3:3542667                                                                            | 3 | 3542667 | 3542838 | 172  | 5   | 34  |
| AATTGAAATT                                                                                                                            | AATTGAAATTTCCGGCAAATCGACAAATTGCGGG                                                              |   |         |         |      |     |     |
| Cele.WB235                                                                                                                            | Cele.WB235_3:3647083                                                                            | 3 | 3647083 | 3647155 | 73   | 4   | 16  |
| CCTACATACC                                                                                                                            | CCTACATACCTACATA                                                                                |   |         |         |      |     |     |
| Cele.WB235                                                                                                                            | Cele.WB235_3:3661285                                                                            | 3 | 3661285 | 3661688 | 404  | 8   | 35  |
| TTCCGGCAAA                                                                                                                            | TTCCGGCAAATCGACAATTTCCGAAAATGAAAAT                                                              |   |         |         |      |     |     |
| Cele.WB235                                                                                                                            | Cele.WB235_3:3684600                                                                            | 3 | 3684600 | 3684680 | 81   | 5   | 12  |
| TAAGCCTAAG                                                                                                                            | TAAGCCTAAGCC                                                                                    |   |         |         |      |     |     |
| Cele.WB235                                                                                                                            | Cele.WB235_3:3740014                                                                            | 3 | 3740014 | 3740583 | 570  | 9   | 30  |
| CCTGTAGGC                                                                                                                             | CCTGTAGGTAAGGAGGTAGGTGTAGGCCG                                                                   |   |         |         |      |     |     |
| Cele.WB235                                                                                                                            | Cele.WB235_3:3746895                                                                            | 3 | 3746895 | 3747055 | 161  | 10  | 16  |
| TAGGCATGTA                                                                                                                            | TAGACATGTAGGCATG                                                                                |   |         |         |      |     |     |
| Cele.WB235                                                                                                                            | Cele.WB235_3:3794723                                                                            | 3 | 3794723 | 3795033 | 311  | 5   | 18  |
| TGCAGCACTA                                                                                                                            | TGCAGCACTATTAGAGAC                                                                              |   |         |         |      |     |     |
| Cele.WB235                                                                                                                            | Cele.WB235_3:3895928                                                                            | 3 | 3895928 | 3896228 | 301  | 8   | 40  |
| AGAACCTTCT                                                                                                                            | AGAACCTTCTGGGAATTTCTGGAAAATTTCTAGAATGTTCC                                                       |   |         |         |      |     |     |
| Cele.WB235                                                                                                                            | Cele.WB235_3:3896301                                                                            | 3 | 3896301 | 3896751 | 451  | 30  | 15  |
| CGTGGTGAGA                                                                                                                            | CGTGGTGAGACCCAT                                                                                 |   |         |         |      |     |     |
| Cele.WB235                                                                                                                            | Cele.WB235_3:3896794                                                                            | 3 | 3896794 | 3897038 | 245  | 7   | 35  |
| AATTTAAATT                                                                                                                            | AATTTAAATTTTCTGTGAAAAATATTTTGGCGGGA                                                             |   |         |         |      |     |     |
| Cele.WB235                                                                                                                            | Cele.WB235_3:3897112                                                                            | 3 | 3897112 | 3897672 | 561  | 14  | 40  |
| GTTCCAGAAC                                                                                                                            | GTTCCAGAACTTTCTAGAAAAATCGGGAAAATTTCTGGAAT                                                       |   |         |         |      |     |     |

|                                                                                                                                     |                                                                                                 |   |         |         |       |     |     |
|-------------------------------------------------------------------------------------------------------------------------------------|-------------------------------------------------------------------------------------------------|---|---------|---------|-------|-----|-----|
| Cele.WB235                                                                                                                          | Cele.WB235_3:3987076                                                                            | 3 | 3987076 | 3987676 | 601   | 31  | 19  |
| AAAAATAGAT                                                                                                                          | AAAAATAGATTGTTACACG                                                                             |   |         |         |       |     |     |
| Cele.WB235                                                                                                                          | Cele.WB235_3:4254156                                                                            | 3 | 4254156 | 4254274 | 119   | 7   | 17  |
| AGGGGGCATC                                                                                                                          | AGGGGGCATTAGGTCAA                                                                               |   |         |         |       |     |     |
| Cele.WB235                                                                                                                          | Cele.WB235_3:4257044                                                                            | 3 | 4257044 | 4257162 | 119   | 7   | 17  |
| GATGCCCCCT                                                                                                                          | GATGCCCCCTCTGAATG                                                                               |   |         |         |       |     |     |
| Cele.WB235                                                                                                                          | Cele.WB235_3:4637893                                                                            | 3 | 4637893 | 4638151 | 259   | 5   | 17  |
| ATTATTTTCA                                                                                                                          | ATTATTTTCATTCCGTG                                                                               |   |         |         |       |     |     |
| Cele.WB235                                                                                                                          | Cele.WB235_3:5285020                                                                            | 3 | 5285020 | 5285610 | 591   | 28  | 20  |
| CTAGGTCTGC                                                                                                                          | CTAGGTCTGCCTAGGGTAGG                                                                            |   |         |         |       |     |     |
| Cele.WB235                                                                                                                          | Cele.WB235_3:5285044                                                                            | 3 | 5285044 | 5285922 | 879   | 40  | 20  |
| GGTAGGCTAG                                                                                                                          | GGTAGGCTAGGTCTGCCCAG                                                                            |   |         |         |       |     |     |
| Cele.WB235                                                                                                                          | Cele.WB235_3:5353177                                                                            | 3 | 5353177 | 5358366 | 5190  | 198 | 26  |
| GTTAGAGTCA                                                                                                                          | GTTAGAGTCATTATGTTAGGTGAATG                                                                      |   |         |         |       |     |     |
| Cele.WB235                                                                                                                          | Cele.WB235_3:5358375                                                                            | 3 | 5358375 | 5358505 | 131   | 5   | 26  |
| ACCATTCAAC                                                                                                                          | ACCATTCAACCAAAATAATGACTCTA                                                                      |   |         |         |       |     |     |
| Cele.WB235                                                                                                                          | Cele.WB235_3:5941097                                                                            | 3 | 5941097 | 5943578 | 2482  | 10  | 228 |
| CCACCAGATC                                                                                                                          |                                                                                                 |   |         |         |       |     |     |
| CCACCAGATCAGCAGCGTCTCATCTTCGCCGGAAGCAGCTCGAGGACGCCGCACCCTGTCTGACTACAACATCCAGAAGGAATCTACTCTTCACTTGGTTCTTCGTCTTAGAGGAGGAATGCAGATCTTTG |                                                                                                 |   |         |         |       |     |     |
| TCAAGACTTTGACTGGAAGACCATCACACTTGAAGTTGAAGCTTCCGACACGATCGAGAACGTCAAGGCCAAGATTCAAGACAAGGAGGGAATC                                      |                                                                                                 |   |         |         |       |     |     |
| Cele.WB235                                                                                                                          | Cele.WB235_3:6013025                                                                            | 3 | 6013025 | 6013087 | 63    | 4   | 15  |
| CGAAAAGGGG                                                                                                                          | CGAAAAGGGGATCTG                                                                                 |   |         |         |       |     |     |
| Cele.WB235                                                                                                                          | Cele.WB235_3:6013262                                                                            | 3 | 6013262 | 6013339 | 78    | 5   | 15  |
| TCCCCTTTTC                                                                                                                          | TCCCCTTTTCGTATC                                                                                 |   |         |         |       |     |     |
| Cele.WB235                                                                                                                          | Cele.WB235_3:6185212                                                                            | 3 | 6185212 | 6186090 | 879   | 42  | 19  |
| AAAAATAGAT                                                                                                                          | AAAAATAGATTGTTACACG                                                                             |   |         |         |       |     |     |
| Cele.WB235                                                                                                                          | Cele.WB235_3:6551383                                                                            | 3 | 6551383 | 6551520 | 138   | 9   | 15  |
| CGAAAAGGGG                                                                                                                          | CGAAAAGGGGATCTG                                                                                 |   |         |         |       |     |     |
| Cele.WB235                                                                                                                          | Cele.WB235_3:6551695                                                                            | 3 | 6551695 | 6551771 | 77    | 5   | 15  |
| TCCCCTTTTC                                                                                                                          | TCCCCTTTTCGTATC                                                                                 |   |         |         |       |     |     |
| Cele.WB235                                                                                                                          | Cele.WB235_3:6626010                                                                            | 3 | 6626010 | 6626226 | 217   | 6   | 21  |
| AAATCTAATC                                                                                                                          | AAATCTAATCCAATATGGCCG                                                                           |   |         |         |       |     |     |
| Cele.WB235                                                                                                                          | Cele.WB235_3:7405401                                                                            | 3 | 7405401 | 7443206 | 37806 | 109 | 94  |
| CAATATTTAG                                                                                                                          | CAATATTTAGAGAACAGAAAGATTTTGAGAAATACTGCCTCCAGAAATTGATGATTTTCCCATTGATTTGTCTACATAAGGCATCGAAAAGCACC |   |         |         |       |     |     |
| Cele.WB235                                                                                                                          | Cele.WB235_3:7444445                                                                            | 3 | 7444445 | 7448204 | 3760  | 143 | 27  |
| ACAGAGAGTA                                                                                                                          | ACAGAGAGTAAAAAATAGTGGGAAGCC                                                                     |   |         |         |       |     |     |
| Cele.WB235                                                                                                                          | Cele.WB235_3:7448277                                                                            | 3 | 7448277 | 7452238 | 3962  | 40  | 94  |
| ACCCAATATT                                                                                                                          | ACCCAATATTTAGAGAAGAGAAGATTTTGAGAAATACTGCCTCCAGAAATTGATGATTTTCCCATTGATTTGTCTACATAGGGCATCGAAAAGT  |   |         |         |       |     |     |
| Cele.WB235                                                                                                                          | Cele.WB235_3:7452275                                                                            | 3 | 7452275 | 7453348 | 1074  | 91  | 11  |
| TGGAGCGGTT                                                                                                                          | TGGAGCGGTTT                                                                                     |   |         |         |       |     |     |
| Cele.WB235                                                                                                                          | Cele.WB235_3:7593704                                                                            | 3 | 7593704 | 7593825 | 122   | 11  | 11  |
| CGGATAATTA                                                                                                                          | CGGATAATTAA                                                                                     |   |         |         |       |     |     |
| Cele.WB235                                                                                                                          | Cele.WB235_3:7594698                                                                            | 3 | 7594698 | 7597267 | 2570  | 98  | 26  |
| ATTAGATGAA                                                                                                                          | ATTAGATGAAATTCCAAAATTAGACC                                                                      |   |         |         |       |     |     |
| Cele.WB235                                                                                                                          | Cele.WB235_3:7602309                                                                            | 3 | 7602309 | 7602577 | 269   | 6   | 45  |
| TCTGATCCTT                                                                                                                          | TCTGATCCTTCAGCTCCGAAGGATCACATGGGTACCTTCTGATGT                                                   |   |         |         |       |     |     |
| Cele.WB235                                                                                                                          | Cele.WB235_3:7602873                                                                            | 3 | 7602873 | 7603364 | 492   | 11  | 45  |
| GAAGGATCAG                                                                                                                          | GAAGGATCAGAACATCAGGAGGTACCCATGTGATCATTCGGCTCT                                                   |   |         |         |       |     |     |
| Cele.WB235                                                                                                                          | Cele.WB235_3:7668665                                                                            | 3 | 7668665 | 7669197 | 533   | 28  | 19  |
| AATCTATTTT                                                                                                                          | AATCTATTTTTCGTGTAAC                                                                             |   |         |         |       |     |     |
| Cele.WB235                                                                                                                          | Cele.WB235_3:7678163                                                                            | 3 | 7678163 | 7678429 | 267   | 14  | 19  |
| CAATCTATTT                                                                                                                          | CAATCTATTTTTCGTGTAA                                                                             |   |         |         |       |     |     |

|                               |                                                                                                                                         |   |          |          |      |    |     |
|-------------------------------|-----------------------------------------------------------------------------------------------------------------------------------------|---|----------|----------|------|----|-----|
| Cele.WB235                    | Cele.WB235_3:7708654                                                                                                                    | 3 | 7708654  | 7708716  | 63   | 4  | 15  |
| CGAAAAGGGG                    | CGAAAAGGGGATCTG                                                                                                                         |   |          |          |      |    |     |
| Cele.WB235                    | Cele.WB235_3:7708901                                                                                                                    | 3 | 7708901  | 7708993  | 93   | 6  | 15  |
| TCCCCTTTTC                    | TCCCCTTTTCGTATC                                                                                                                         |   |          |          |      |    |     |
| Cele.WB235                    | Cele.WB235_3:8254497                                                                                                                    | 3 | 8254497  | 8254602  | 106  | 5  | 21  |
| AAGTTTTACT                    | AAGTTTTACTTTGATTTTTTT                                                                                                                   |   |          |          |      |    |     |
| Cele.WB235                    | Cele.WB235_3:8334779                                                                                                                    | 3 | 8334779  | 8334979  | 201  | 12 | 16  |
| AGGCACGTAG                    | AGGAACGTAGGCACGT                                                                                                                        |   |          |          |      |    |     |
| Cele.WB235                    | Cele.WB235_3:8335590                                                                                                                    | 3 | 8335590  | 8336085  | 496  | 32 | 15  |
| ACCCATCGTG                    | ACCCATCGTGGCGAG                                                                                                                         |   |          |          |      |    |     |
| Cele.WB235                    | Cele.WB235_3:8336113                                                                                                                    | 3 | 8336113  | 8336287  | 175  | 5  | 35  |
| GGGAAATTTA                    | GGGAAATTTAAATTTTCTGTGAAAAATATTTTGGG                                                                                                     |   |          |          |      |    |     |
| Cele.WB235                    | Cele.WB235_3:8344363                                                                                                                    | 3 | 8344363  | 8344643  | 281  | 7  | 40  |
| TCTGGAATGT                    | TCTGGAATGTTCCAGAACTTTCTAGAAAAATTGGGAAAAG                                                                                                |   |          |          |      |    |     |
| Cele.WB235                    | Cele.WB235_3:8897677                                                                                                                    | 3 | 8897677  | 8897798  | 122  | 11 | 11  |
| ATTTGGAATA                    | ATTTGGAATAT                                                                                                                             |   |          |          |      |    |     |
| Cele.WB235                    | Cele.WB235_3:8958876                                                                                                                    | 3 | 8958876  | 8960427  | 1552 | 21 | 59  |
| TTCAAAACTT                    | TTCAAAACTTTTAACTTAGATTTATGGAGAATATGGAATTTCAAATGTGCACTGGTT                                                                               |   |          |          |      |    |     |
| Cele.WB235                    | Cele.WB235_3:9533702                                                                                                                    | 3 | 9533702  | 9534094  | 393  | 13 | 11  |
| GTACTGTAGG                    | GTACTGTAGGG                                                                                                                             |   |          |          |      |    |     |
| Cele.WB235                    | Cele.WB235_3:9534180                                                                                                                    | 3 | 9534180  | 9534500  | 321  | 8  | 40  |
| TCCAGAACCT                    | TCCAGAACCTTCTGGAAATCCGAGAAATCTGGAATGT                                                                                                   |   |          |          |      |    |     |
| Cele.WB235                    | Cele.WB235_3:9534215                                                                                                                    | 3 | 9534215  | 9534836  | 622  | 9  | 40  |
| AATGTTCCAG                    | AATGTTCCAGAACCTTCTGGAAATTTGAGAAAATGCTGG                                                                                                 |   |          |          |      |    |     |
| Cele.WB235                    | Cele.WB235_3:9853874                                                                                                                    | 3 | 9853874  | 9853997  | 124  | 4  | 31  |
| TCTGCTAAAT                    | TCTGCTAAATAATTAGCAGACCATACTTGAT                                                                                                         |   |          |          |      |    |     |
| Cele.WB235                    | Cele.WB235_3:9863897                                                                                                                    | 3 | 9863897  | 9863967  | 71   | 4  | 19  |
| TGGTTGAGGC                    | TGGTTGAGGCTCTAGATT                                                                                                                      |   |          |          |      |    |     |
| Cele.WB235                    | Cele.WB235_3:9869882                                                                                                                    | 3 | 9869882  | 9869977  | 96   | 5  | 19  |
| ATTTTGGTTG                    | ATTTTGGTTGAGGTTGAGG                                                                                                                     |   |          |          |      |    |     |
| Cele.WB235                    | Cele.WB235_3:9940544                                                                                                                    | 3 | 9940544  | 9940665  | 122  | 6  | 20  |
| TGACATACCA                    | TGACATACCAAAAAATAGAT                                                                                                                    |   |          |          |      |    |     |
| Cele.WB235                    | Cele.WB235_3:9958568                                                                                                                    | 3 | 9958568  | 9958766  | 199  | 4  | 31  |
| TATGCTAAAT                    | TATGCTAAATATTAGCAGACCCAACGTTGG                                                                                                          |   |          |          |      |    |     |
| Cele.WB235                    | Cele.WB235_3:10123441                                                                                                                   | 3 | 10123441 | 10123519 | 79   | 5  | 15  |
| CGAAAAGGGG                    | CGAAAAGGGGATCTC                                                                                                                         |   |          |          |      |    |     |
| Cele.WB235                    | Cele.WB235_3:10123694                                                                                                                   | 3 | 10123694 | 10123786 | 93   | 5  | 15  |
| TCCCCTTTTC                    | TCCCCTTTTCGCAGA                                                                                                                         |   |          |          |      |    |     |
| Cele.WB235                    | Cele.WB235_3:10224644                                                                                                                   | 3 | 10224644 | 10226007 | 1364 | 23 | 59  |
| AAATGTGCAC                    | AAATGTGCACTGGTTTTCAAATTTTTTAACCTAAGAATTATGGAAAAATGGAAATTT                                                                               |   |          |          |      |    |     |
| Cele.WB235                    | Cele.WB235_3:10226211                                                                                                                   | 3 | 10226211 | 10227863 | 1653 | 11 | 164 |
| TATGGGAAAA                    | TATGGGAAAAATTATATGGAGTCATTCTTTTTTATTGCATAAACTGTTTCAGCATAGTCAAAAATACCAGAATATGCCAATCACAGTATAATAGCTTATACGGAAGTATTTTTTTTAAAAATTGATAAAAAATAT |   |          |          |      |    |     |
| ATAAAAGCTGATTTTTTCAAATTTCAAAG |                                                                                                                                         |   |          |          |      |    |     |
| Cele.WB235                    | Cele.WB235_3:10316800                                                                                                                   | 3 | 10316800 | 10317870 | 1071 | 27 | 40  |
| AAAAGTAGGT                    | AAAAGTAGGTATGACCTAGTTTTTTCATGTGACCTACTTC                                                                                                |   |          |          |      |    |     |
| Cele.WB235                    | Cele.WB235_3:10436267                                                                                                                   | 3 | 10436267 | 10436329 | 63   | 4  | 15  |
| CGAAAAGGGG                    | CGAAAAGGGGATCTG                                                                                                                         |   |          |          |      |    |     |
| Cele.WB235                    | Cele.WB235_3:10436489                                                                                                                   | 3 | 10436489 | 10436581 | 93   | 6  | 15  |
| TCCCCTTTTC                    | TCCCCTTTTCGTATC                                                                                                                         |   |          |          |      |    |     |
| Cele.WB235                    | Cele.WB235_3:10480990                                                                                                                   | 3 | 10480990 | 10481350 | 361  | 14 | 16  |
| TAGGCACGTA                    | TAGGCACGTAGGCACA                                                                                                                        |   |          |          |      |    |     |

|            |                                               |   |          |          |      |    |    |
|------------|-----------------------------------------------|---|----------|----------|------|----|----|
| Cele.WB235 | Cele.WB235_3:10489911                         | 3 | 10489911 | 10490082 | 172  | 5  | 34 |
| TTTCCGGCAA | TTTCCGGCAAATCGGCGAATTGCCGGAATTGAAT            |   |          |          |      |    |    |
| Cele.WB235 | Cele.WB235_3:10636973                         | 3 | 10636973 | 10637342 | 370  | 11 | 29 |
| GGCCTAGAAA | GGCCTAGAAAACCCATTTTAAAGTTGGT                  |   |          |          |      |    |    |
| Cele.WB235 | Cele.WB235_3:10661890                         | 3 | 10661890 | 10662218 | 329  | 9  | 35 |
| CAATTTGCCG | CAATTTGCCGATTTGCCTGAAATTATCATATCCGG           |   |          |          |      |    |    |
| Cele.WB235 | Cele.WB235_3:10678429                         | 3 | 10678429 | 10678847 | 419  | 11 | 35 |
| CCGCCAAAAT | CCGCCAAAATATTTTTCTACTAAAAATTGAATTTT           |   |          |          |      |    |    |
| Cele.WB235 | Cele.WB235_3:10683224                         | 3 | 10683224 | 10684272 | 1049 | 30 | 35 |
| AAATTCAAAT | AAATTCAAATTTTGTAGTGAAAAATATTTGGCGGA           |   |          |          |      |    |    |
| Cele.WB235 | Cele.WB235_3:10792337                         | 3 | 10792337 | 10792694 | 358  | 8  | 45 |
| TCTGATCCTT | TCTGATCCTTCAGCTCCGAAGGATCACATGGGTACCTTCTGATGT |   |          |          |      |    |    |
| Cele.WB235 | Cele.WB235_3:10796467                         | 3 | 10796467 | 10796566 | 100  | 5  | 20 |
| GTTACACGAA | GTTACACGAAAAAATAGATT                          |   |          |          |      |    |    |
| Cele.WB235 | Cele.WB235_3:10811336                         | 3 | 10811336 | 10811411 | 76   | 5  | 15 |
| TCCCCTTTTC | TCCCCTTTTCATATC                               |   |          |          |      |    |    |
| Cele.WB235 | Cele.WB235_3:10924768                         | 3 | 10924768 | 10924858 | 91   | 6  | 12 |
| GGCTTAGGCT | GGCTTAGGCTTA                                  |   |          |          |      |    |    |
| Cele.WB235 | Cele.WB235_3:10943916                         | 3 | 10943916 | 10944702 | 787  | 15 | 37 |
| TTGGCGGGAA | TTGGCAGGAATTCAAATTTTAATTTTAAAAATATT           |   |          |          |      |    |    |
| Cele.WB235 | Cele.WB235_3:10975223                         | 3 | 10975223 | 10975307 | 85   | 5  | 12 |
| GGCTTAGGCT | GGCTTAAGCTCA                                  |   |          |          |      |    |    |
| Cele.WB235 | Cele.WB235_3:11002899                         | 3 | 11002899 | 11003053 | 155  | 5  | 31 |
| GCAGCCGACG | GCAGCCGACGATATACGCGTTTCGCTGGAGTA              |   |          |          |      |    |    |
| Cele.WB235 | Cele.WB235_3:11004687                         | 3 | 11004687 | 11006367 | 1681 | 84 | 20 |
| TCTATTTTTT | TCTATTTTTTGGTATGCCAA                          |   |          |          |      |    |    |
| Cele.WB235 | Cele.WB235_3:11027127                         | 3 | 11027127 | 11027171 | 45   | 4  | 11 |
| AAACTTGGGC | AAACTTGGGCA                                   |   |          |          |      |    |    |
| Cele.WB235 | Cele.WB235_3:11152069                         | 3 | 11152069 | 11152305 | 237  | 6  | 35 |
| AATTGCCGGA | AATTGCCGGAATTAAAGATTTCCGGCAAATTGGCC           |   |          |          |      |    |    |
| Cele.WB235 | Cele.WB235_3:11160584                         | 3 | 11160584 | 11160784 | 201  | 5  | 40 |
| TCCAGAACCT | TCCAGAACCTTCTGGAATAATTGAGAAAATGCTGGAATGT      |   |          |          |      |    |    |
| Cele.WB235 | Cele.WB235_3:11160967                         | 3 | 11160967 | 11161287 | 321  | 10 | 32 |
| TTTCTGTGAA | TTTCTGTGAAAAATTATAACGGGAATTCAAAA              |   |          |          |      |    |    |
| Cele.WB235 | Cele.WB235_3:11189285                         | 3 | 11189285 | 11189691 | 407  | 12 | 31 |
| TCTGAGCTAC | TCTGAGCTACAGTACTCCTGTCAAGAACAGT               |   |          |          |      |    |    |
| Cele.WB235 | Cele.WB235_3:11207917                         | 3 | 11207917 | 11208073 | 157  | 10 | 12 |
| GCTTAGGCTT | GCCTAGGCTTAG                                  |   |          |          |      |    |    |
| Cele.WB235 | Cele.WB235_3:11221697                         | 3 | 11221697 | 11221865 | 169  | 11 | 14 |
| GATAATTGAA | GATAATTGAAAATC                                |   |          |          |      |    |    |
| Cele.WB235 | Cele.WB235_3:11242813                         | 3 | 11242813 | 11243253 | 441  | 21 | 21 |
| GGCAATTTTC | GGCAATTTTCCAGTGCAATTC                         |   |          |          |      |    |    |
| Cele.WB235 | Cele.WB235_3:11311767                         | 3 | 11311767 | 11311976 | 210  | 6  | 35 |
| GATTTGCCGG | GATTTGCCGGAAATATTCAAATCCGGCAAATTGCA           |   |          |          |      |    |    |
| Cele.WB235 | Cele.WB235_3:11314293                         | 3 | 11314293 | 11314573 | 281  | 6  | 35 |
| TTGCCGGATT | TTGCCGGATTGTAATATTTTCGGCAAATCGGTAAA           |   |          |          |      |    |    |
| Cele.WB235 | Cele.WB235_3:11331372                         | 3 | 11331372 | 11331497 | 126  | 4  | 11 |
| CTACAGTACT | CTACAGTACTT                                   |   |          |          |      |    |    |
| Cele.WB235 | Cele.WB235_3:11399826                         | 3 | 11399826 | 11400260 | 435  | 31 | 14 |
| AATTATAAAT | AATTATAAATTATA                                |   |          |          |      |    |    |
| Cele.WB235 | Cele.WB235_3:11422288                         | 3 | 11422288 | 11422568 | 281  | 6  | 35 |
| TTTGCCGGAA | TTTGCCGGAAATTTAGATTTTGGCAAATTGCCGA            |   |          |          |      |    |    |

|                                                                                                                                       |                                              |   |          |          |      |    |     |
|---------------------------------------------------------------------------------------------------------------------------------------|----------------------------------------------|---|----------|----------|------|----|-----|
| Cele.WB235                                                                                                                            | Cele.WB235_3:11424870                        | 3 | 11424870 | 11425146 | 277  | 12 | 12  |
| TTAGGCTTAG                                                                                                                            | TTAGGCTTAGGC                                 |   |          |          |      |    |     |
| Cele.WB235                                                                                                                            | Cele.WB235_3:11475036                        | 3 | 11475036 | 11475156 | 121  | 10 | 12  |
| CTTAGGCTTA                                                                                                                            | CTTAGACTTATG                                 |   |          |          |      |    |     |
| Cele.WB235                                                                                                                            | Cele.WB235_3:11475344                        | 3 | 11475344 | 11475488 | 145  | 7  | 16  |
| TACAAGCCTA                                                                                                                            | TACACGCCTACAAGCC                             |   |          |          |      |    |     |
| Cele.WB235                                                                                                                            | Cele.WB235_3:11495534                        | 3 | 11495534 | 11496085 | 552  | 15 | 34  |
| AAATTTCAAT                                                                                                                            | AAATTTCAATTCCGCTAATTTGCCGATTTGCCGG           |   |          |          |      |    |     |
| Cele.WB235                                                                                                                            | Cele.WB235_3:11546762                        | 3 | 11546762 | 11547752 | 991  | 24 | 35  |
| CGGCAAATCG                                                                                                                            | CGGCAAATCGGTAAATTGCCGAACTGAATATTTTC          |   |          |          |      |    |     |
| Cele.WB235                                                                                                                            | Cele.WB235_3:11593439                        | 3 | 11593439 | 11602256 | 8818 | 48 | 184 |
| TACGCAGCCG                                                                                                                            |                                              |   |          |          |      |    |     |
| TACGCAGCCGAACGTATCATAAGTGAATACAGAACACCAATTATGTCCGAGAAAAAGATCCTACTCAGAATATGAACATATTCAAAAATATCGGAGGTATATAGATTCCCGAAGAGCCTTTCCAATTAACCAA |                                              |   |          |          |      |    |     |
| ACGGTTCAAATTTCTAGCAAACATCTCCTTACTTGAACACTCTTGGCCAATG                                                                                  |                                              |   |          |          |      |    |     |
| Cele.WB235                                                                                                                            | Cele.WB235_3:11687193                        | 3 | 11687193 | 11687714 | 522  | 14 | 35  |
| CCGATTTGCC                                                                                                                            | CCGATTTGCCGAAATTTCAAATCCGGCAATTTT            |   |          |          |      |    |     |
| Cele.WB235                                                                                                                            | Cele.WB235_3:11700371                        | 3 | 11700371 | 11700706 | 336  | 7  | 11  |
| GTACTGTAGA                                                                                                                            | GTACTGTAGAG                                  |   |          |          |      |    |     |
| Cele.WB235                                                                                                                            | Cele.WB235_3:11707265                        | 3 | 11707265 | 11707854 | 590  | 30 | 12  |
| GGCTTAGGCT                                                                                                                            | GGCTTAGGTATA                                 |   |          |          |      |    |     |
| Cele.WB235                                                                                                                            | Cele.WB235_3:11722253                        | 3 | 11722253 | 11722390 | 138  | 8  | 12  |
| TAAGCCTAAG                                                                                                                            | TAAGCCTAAACC                                 |   |          |          |      |    |     |
| Cele.WB235                                                                                                                            | Cele.WB235_3:11737191                        | 3 | 11737191 | 11737281 | 91   | 6  | 12  |
| CCTAAGCCTA                                                                                                                            | CCTAACCCTAAC                                 |   |          |          |      |    |     |
| Cele.WB235                                                                                                                            | Cele.WB235_3:11783258                        | 3 | 11783258 | 11783348 | 91   | 4  | 12  |
| AGCCTGAGCC                                                                                                                            | AGCCTGAGCCTC                                 |   |          |          |      |    |     |
| Cele.WB235                                                                                                                            | Cele.WB235_3:11784840                        | 3 | 11784840 | 11785090 | 251  | 9  | 12  |
| TAAGCCTAAG                                                                                                                            | TAAGCCTAAGCC                                 |   |          |          |      |    |     |
| Cele.WB235                                                                                                                            | Cele.WB235_3:11798467                        | 3 | 11798467 | 11798684 | 218  | 6  | 34  |
| TTGCCGAATT                                                                                                                            | TTGCCGAATTTCCGTTTGCCGAGCTCGTCAAAC            |   |          |          |      |    |     |
| Cele.WB235                                                                                                                            | Cele.WB235_3:11817185                        | 3 | 11817185 | 11817612 | 428  | 12 | 35  |
| AATTGCCGGA                                                                                                                            | AATTGCCGGAACAAAACTTCCGGCAAATCGGCA            |   |          |          |      |    |     |
| Cele.WB235                                                                                                                            | Cele.WB235_3:11862696                        | 3 | 11862696 | 11862861 | 166  | 15 | 11  |
| ACATTTTTTG                                                                                                                            | ACATTTTTTGC                                  |   |          |          |      |    |     |
| Cele.WB235                                                                                                                            | Cele.WB235_3:11864487                        | 3 | 11864487 | 11864917 | 431  | 13 | 34  |
| AAGTATTTTT                                                                                                                            | AAGTATTTTTTGCCGTTTTTTTGCCGAAATTTCC           |   |          |          |      |    |     |
| Cele.WB235                                                                                                                            | Cele.WB235_3:11924167                        | 3 | 11924167 | 11924393 | 227  | 6  | 35  |
| TTCCGGCAAA                                                                                                                            | TTCCGGCAAATTGGCAAATTGCTGGAAATTAAAAAT         |   |          |          |      |    |     |
| Cele.WB235                                                                                                                            | Cele.WB235_3:11925619                        | 3 | 11925619 | 11926677 | 1059 | 29 | 35  |
| TTCAATTCCG                                                                                                                            | TTCAATTCCGGCAATTTGCCGATTTGCCAGAAATT          |   |          |          |      |    |     |
| Cele.WB235                                                                                                                            | Cele.WB235_3:12001471                        | 3 | 12001471 | 12001873 | 403  | 10 | 40  |
| ATTCCAGAAT                                                                                                                            | ATTCCAGAATTTTTTCGAATTTCCAGAAAGTTCTAGAAC      |   |          |          |      |    |     |
| Cele.WB235                                                                                                                            | Cele.WB235_3:12004285                        | 3 | 12004285 | 12004750 | 466  | 12 | 35  |
| AAAATTTCCG                                                                                                                            | AAAATTTCCGGCAAATCAGCTAATTGCCAGAATTG          |   |          |          |      |    |     |
| Cele.WB235                                                                                                                            | Cele.WB235_3:12005666                        | 3 | 12005666 | 12006008 | 343  | 8  | 35  |
| GGAATTGAAA                                                                                                                            | GGAATTGAAAACCTCCGGGAAATCGGCAAAATTGGC         |   |          |          |      |    |     |
| Cele.WB235                                                                                                                            | Cele.WB235_3:12009165                        | 3 | 12009165 | 12009381 | 217  | 11 | 20  |
| AAATAGATTG                                                                                                                            | AAATAGATTGACAGACGGAA                         |   |          |          |      |    |     |
| Cele.WB235                                                                                                                            | Cele.WB235_3:12017198                        | 3 | 12017198 | 12017750 | 553  | 10 | 43  |
| AATTGCCGGT                                                                                                                            | AATTGCCGGTTTGCCGATTTGCCAGAAATTTCCGGTTTCCGGCA |   |          |          |      |    |     |
| Cele.WB235                                                                                                                            | Cele.WB235_3:12072321                        | 3 | 12072321 | 12073804 | 1484 | 45 | 32  |
| AAATTTGTGA                                                                                                                            | AAATTTATGAAAATTTAGGCCCATTTTGCCCA             |   |          |          |      |    |     |

|            |                                              |   |          |          |      |    |    |
|------------|----------------------------------------------|---|----------|----------|------|----|----|
| Cele.WB235 | Cele.WB235_3:12130507                        | 3 | 12130507 | 12130633 | 127  | 9  | 12 |
| TAAGCCTAAG | TAAGTCTAAGCC                                 |   |          |          |      |    |    |
| Cele.WB235 | Cele.WB235_3:12141791                        | 3 | 12141791 | 12142267 | 477  | 10 | 32 |
| ATTCAAATTT | ATTCAATTTTTTACAGATACATTTTGGCGAAA             |   |          |          |      |    |    |
| Cele.WB235 | Cele.WB235_3:12143931                        | 3 | 12143931 | 12144015 | 85   | 7  | 12 |
| GGCTTAGGCT | GGCTTAGGCTTA                                 |   |          |          |      |    |    |
| Cele.WB235 | Cele.WB235_3:12172469                        | 3 | 12172469 | 12173356 | 888  | 63 | 11 |
| TTTTTGCACA | TTTTTGCACAT                                  |   |          |          |      |    |    |
| Cele.WB235 | Cele.WB235_3:12188657                        | 3 | 12188657 | 12188828 | 172  | 7  | 19 |
| CAATTTACCA | CAATTTACCAAAAATTTGT                          |   |          |          |      |    |    |
| Cele.WB235 | Cele.WB235_3:12190449                        | 3 | 12190449 | 12190847 | 399  | 13 | 16 |
| ACGTAGGCAC | ACGCAGGCACGTAGGC                             |   |          |          |      |    |    |
| Cele.WB235 | Cele.WB235_3:12196315                        | 3 | 12196315 | 12196495 | 181  | 14 | 12 |
| CTTAGACTTA | CTTAGGCTTAGG                                 |   |          |          |      |    |    |
| Cele.WB235 | Cele.WB235_3:12239290                        | 3 | 12239290 | 12239399 | 110  | 5  | 15 |
| CGACCTGCGA | CGACCTGCGACCTAG                              |   |          |          |      |    |    |
| Cele.WB235 | Cele.WB235_3:12244502                        | 3 | 12244502 | 12244747 | 246  | 7  | 35 |
| AATTGCCGGA | AATTGCCGGAATTCAAAATTTCCGGCTAATCGGCA          |   |          |          |      |    |    |
| Cele.WB235 | Cele.WB235_3:12289600                        | 3 | 12289600 | 12291140 | 1541 | 44 | 35 |
| TTGCCAGAAT | TTGCCAGAATTAAAAATTTCCGGAAAAATCGGCAAG         |   |          |          |      |    |    |
| Cele.WB235 | Cele.WB235_3:12302154                        | 3 | 12302154 | 12302292 | 139  | 9  | 12 |
| TAGGCATAGG | TAGGCATAGACT                                 |   |          |          |      |    |    |
| Cele.WB235 | Cele.WB235_3:12305325                        | 3 | 12305325 | 12305929 | 605  | 14 | 43 |
| AGCAGCCGAC | AGCAGCTGACAGTCACCGGTTGCCGAAAAATTGCAATAATTTTC |   |          |          |      |    |    |
| Cele.WB235 | Cele.WB235_3:12323417                        | 3 | 12323417 | 12323485 | 69   | 4  | 17 |
| TGAAAATAAT | TGAAAATAATCACGGAA                            |   |          |          |      |    |    |
| Cele.WB235 | Cele.WB235_3:12341199                        | 3 | 12341199 | 12341722 | 524  | 7  | 35 |
| TTGCCGGAAT | TTGGCGGAATTGGAAATTTCCGCCAAACCGGCAAA          |   |          |          |      |    |    |
| Cele.WB235 | Cele.WB235_3:12345927                        | 3 | 12345927 | 12348234 | 2308 | 63 | 35 |
| CGGGAAAATT | CGGGAAAATTTAAATTTTTTGGAAACAAATTTTGG          |   |          |          |      |    |    |
| Cele.WB235 | Cele.WB235_3:12389240                        | 3 | 12389240 | 12389685 | 446  | 15 | 17 |
| ATTTTTTCCG | ATTTTTCCGCCGGTTCCG                           |   |          |          |      |    |    |
| Cele.WB235 | Cele.WB235_3:12397168                        | 3 | 12397168 | 12397264 | 97   | 4  | 24 |
| AAGCACCAAC | AAGCACCACTCCTCCAATACTACAA                    |   |          |          |      |    |    |
| Cele.WB235 | Cele.WB235_3:12408999                        | 3 | 12408999 | 12409471 | 473  | 10 | 35 |
| GATTTGCCGG | GATTTGCCGGAATTTTCGATTCCGGCAATTTGCC           |   |          |          |      |    |    |
| Cele.WB235 | Cele.WB235_3:12480633                        | 3 | 12480633 | 12480804 | 172  | 5  | 35 |
| AATTTGAATT | AATTTGAATTTTCCGCCAAAATCCTTTTCTGAGAT          |   |          |          |      |    |    |
| Cele.WB235 | Cele.WB235_3:12485043                        | 3 | 12485043 | 12485356 | 314  | 8  | 35 |
| TTCAAATTTT | TTCAAATTTTATGTGAAAGACATTTTGGCGGTAAA          |   |          |          |      |    |    |
| Cele.WB235 | Cele.WB235_3:12513645                        | 3 | 12513645 | 12515229 | 1585 | 44 | 36 |
| GATATTTTCA | GATATTTTCATGTTCCGGCAAAAATGCCGATTTGCCG        |   |          |          |      |    |    |
| Cele.WB235 | Cele.WB235_3:12531237                        | 3 | 12531237 | 12531912 | 676  | 18 | 35 |
| TTTCCGGCAA | TTTCCGGCAAAACCGGCAAAATGCTGGAAGTGAAGCA        |   |          |          |      |    |    |
| Cele.WB235 | Cele.WB235_3:12532752                        | 3 | 12532752 | 12533511 | 760  | 21 | 34 |
| TTTCAATTCC | TTTCAATTCCGGCATTTTACCAATTTGCCGGAAT           |   |          |          |      |    |    |
| Cele.WB235 | Cele.WB235_3:12538530                        | 3 | 12538530 | 12538668 | 139  | 11 | 12 |
| TATACATATA | TATACATATACA                                 |   |          |          |      |    |    |
| Cele.WB235 | Cele.WB235_3:12581020                        | 3 | 12581020 | 12581289 | 270  | 5  | 43 |
| GGCAAATCGG | GGCAAATCGGCAAACCGGCAATTTGTCAAATATTTCAAATTTCC |   |          |          |      |    |    |
| Cele.WB235 | Cele.WB235_3:12584489                        | 3 | 12584489 | 12584865 | 377  | 11 | 34 |
| TTTCAATTCC | TTTCAATTCCGGCAAATTTGGCGATTTACCGGAAA          |   |          |          |      |    |    |

|            |                                                                               |   |          |          |       |     |    |
|------------|-------------------------------------------------------------------------------|---|----------|----------|-------|-----|----|
| Cele.WB235 | Cele.WB235_3:12629696                                                         | 3 | 12629696 | 12629957 | 262   | 7   | 35 |
| TAATTCGGGC | TAATTCGGCAATTTACCGGTTGCCGGAATAATTT                                            |   |          |          |       |     |    |
| Cele.WB235 | Cele.WB235_3:12636128                                                         | 3 | 12636128 | 12637282 | 1155  | 29  | 35 |
| GGCAAACCGG | GGCAAACCGCATGTTTCCGGAATTACAATTCCC                                             |   |          |          |       |     |    |
| Cele.WB235 | Cele.WB235_3:12692942                                                         | 3 | 12692942 | 12693363 | 422   | 8   | 35 |
| GGAAATTTTA | GGAAATTTTAAATTCCGGCAATTTGCCGGTTAGCC                                           |   |          |          |       |     |    |
| Cele.WB235 | Cele.WB235_3:12696947                                                         | 3 | 12696947 | 12698148 | 1202  | 5   | 32 |
| GACCAATCAG | GACCAATCAGCGATTGCCCCGCCACTCTCT                                                |   |          |          |       |     |    |
| Cele.WB235 | Cele.WB235_3:12698391                                                         | 3 | 12698391 | 12698580 | 190   | 5   | 38 |
| TTTGGCGGG  | TTTGGCGGGAATTCAAATTTTAATTTTTTGAAAATA                                          |   |          |          |       |     |    |
| Cele.WB235 | Cele.WB235_3:12722182                                                         | 3 | 12722182 | 12722605 | 424   | 13  | 35 |
| AAATTTTGAT | AAATTTTGATTTTGGCAATTATCCGATTGCGCG                                             |   |          |          |       |     |    |
| Cele.WB235 | Cele.WB235_3:12731873                                                         | 3 | 12731873 | 12732374 | 502   | 16  | 35 |
| ATTGCGCGGA | ATTGCGCGGAACATTTGATTTTCTGGAATATACCG                                           |   |          |          |       |     |    |
| Cele.WB235 | Cele.WB235_3:12740278                                                         | 3 | 12740278 | 12740831 | 554   | 5   | 32 |
| ACCAATCAGC | ACCAATCAGCGATTGCTCCGCCACTTTGA                                                 |   |          |          |       |     |    |
| Cele.WB235 | Cele.WB235_3:12762055                                                         | 3 | 12762055 | 12762649 | 595   | 17  | 35 |
| AAATTCAAAT | AAATTCAAATTTCTGATAAATATTTTATGGCGGT                                            |   |          |          |       |     |    |
| Cele.WB235 | Cele.WB235_3:12817385                                                         | 3 | 12817385 | 12817569 | 185   | 5   | 31 |
| GATTTTTTCA | GATTTTTTTCAGGGAAAAACCAAAAAAATTC                                               |   |          |          |       |     |    |
| Cele.WB235 | Cele.WB235_3:12823844                                                         | 3 | 12823844 | 12823984 | 141   | 4   | 35 |
| CGGCAATTTG | CGGCAATTTGCCAAAAATGAAAATTTCCGGCAAAT                                           |   |          |          |       |     |    |
| Cele.WB235 | Cele.WB235_3:12835769                                                         | 3 | 12835769 | 12836969 | 1201  | 30  | 20 |
| TGTAGATTTA | TGTAGATTTACGAAATTCTA                                                          |   |          |          |       |     |    |
| Cele.WB235 | Cele.WB235_3:12839625                                                         | 3 | 12839625 | 12840128 | 504   | 16  | 19 |
| TTGGCAATTT | TTGGCAATTTGACCAAAAAAT                                                         |   |          |          |       |     |    |
| Cele.WB235 | Cele.WB235_3:12878018                                                         | 3 | 12878018 | 12878110 | 93    | 5   | 15 |
| CGAAAAGGGG | CGAAAAGGGGAGATA                                                               |   |          |          |       |     |    |
| Cele.WB235 | Cele.WB235_3:12878285                                                         | 3 | 12878285 | 12878362 | 78    | 5   | 15 |
| TCCCCTTTTC | TCCCCTTTTCGTATC                                                               |   |          |          |       |     |    |
| Cele.WB235 | Cele.WB235_3:12884539                                                         | 3 | 12884539 | 12885107 | 569   | 13  | 35 |
| TGCCGGAATT | TGCCGGAATTTAGAAATTTTCGACAAAGTGCCAAAT                                          |   |          |          |       |     |    |
| Cele.WB235 | Cele.WB235_3:12944421                                                         | 3 | 12944421 | 12944571 | 151   | 9   | 12 |
| TAAGCCTAAG | TGAGCCTAAGCA                                                                  |   |          |          |       |     |    |
| Cele.WB235 | Cele.WB235_3:12985357                                                         | 3 | 12985357 | 12986137 | 781   | 10  | 78 |
| CGAAGTTGCT | CGAAGTTGCTGGATCAACGATCACACAGGCGGATTTGTCTGCACAACCGGATCAGAAGTCGTCGTACTTGGATCTTT |   |          |          |       |     |    |
| Cele.WB235 | Cele.WB235_3:12987113                                                         | 3 | 12987113 | 12987245 | 133   | 7   | 12 |
| CGCGACACGC | CGCGACACGCAA                                                                  |   |          |          |       |     |    |
| Cele.WB235 | Cele.WB235_3:13032223                                                         | 3 | 13032223 | 13032864 | 642   | 39  | 10 |
| TACCGCCCGC | TACCGCCCGC                                                                    |   |          |          |       |     |    |
| Cele.WB235 | Cele.WB235_3:13074772                                                         | 3 | 13074772 | 13086747 | 11976 | 170 | 59 |
| TCTCCATAAT | TCTCCATAATTCTCAGTTTAAAAAATTTGAACATCAATACACATTTGAAATTCATAT                     |   |          |          |       |     |    |
| Cele.WB235 | Cele.WB235_3:13094103                                                         | 3 | 13094103 | 13095343 | 1241  | 25  | 43 |
| CGGAAATTTT | CGGAAATTTTGATTTTTCGGTAATTTGCCGGTTTACTGGTTTGC                                  |   |          |          |       |     |    |
| Cele.WB235 | Cele.WB235_3:13095846                                                         | 3 | 13095846 | 13096595 | 750   | 22  | 34 |
| AAATCGGCAA | AAATCGGCAAATTGCCGGAATTAAAAATTTTCGGC                                           |   |          |          |       |     |    |
| Cele.WB235 | Cele.WB235_3:13099929                                                         | 3 | 13099929 | 13100574 | 646   | 18  | 34 |
| CGGAATTGAA | CGGAATTGAAATTTCCGGCAAATCGACAACCTTGC                                           |   |          |          |       |     |    |
| Cele.WB235 | Cele.WB235_3:13116308                                                         | 3 | 13116308 | 13116374 | 67    | 5   | 11 |
| AAAAATGTGC | AAAAATGTGCA                                                                   |   |          |          |       |     |    |
| Cele.WB235 | Cele.WB235_3:13129352                                                         | 3 | 13129352 | 13129936 | 585   | 45  | 12 |
| AGTTATATAG | AGTTATATAGTA                                                                  |   |          |          |       |     |    |

|             |                                               |   |          |          |      |    |    |
|-------------|-----------------------------------------------|---|----------|----------|------|----|----|
| Cele.WB235  | Cele.WB235_3:13167617                         | 3 | 13167617 | 13167762 | 146  | 5  | 31 |
| CCAAAAATGA  | CCAAAAATGACTGAAATTAGTCAAAAAATTGG              |   |          |          |      |    |    |
| Cele.WB235  | Cele.WB235_3:13243432                         | 3 | 13243432 | 13245239 | 1808 | 95 | 19 |
| AAAAATAGAT  | AAAAATAGATTGGCATACTG                          |   |          |          |      |    |    |
| Cele.WB235  | Cele.WB235_3:13268025                         | 3 | 13268025 | 13268308 | 284  | 8  | 30 |
| TTTCAGGCCA  | TTTCAGGCCAATTTTCGGTCAATTTTGGACA               |   |          |          |      |    |    |
| Cele.WB235  | Cele.WB235_3:13447046                         | 3 | 13447046 | 13447886 | 841  | 21 | 40 |
| ATTTTCTAG   | ATTTTCTAGAAAGTTCTGGAACATTCAGAATTTTCCCA        |   |          |          |      |    |    |
| Cele.WB235  | Cele.WB235_3:13447979                         | 3 | 13447979 | 13448227 | 249  | 7  | 35 |
| AATTTCCCGC  | AATTTCCCGCCAAAATATTTTCTCAGAAAATTTTC           |   |          |          |      |    |    |
| Cele.WB235  | Cele.WB235_3:13448299                         | 3 | 13448299 | 13448524 | 226  | 15 | 15 |
| CCACGATGGG  | CCACGATGGGTCTCA                               |   |          |          |      |    |    |
| Cele.WB235  | Cele.WB235_3:13583331                         | 3 | 13583331 | 13583502 | 172  | 7  | 24 |
| AAGAAGGATG  | AAGAAAGATGCCGAAGAGAAGAAG                      |   |          |          |      |    |    |
| Cele.WB235  | Cele.WB235_3:13750231                         | 3 | 13750231 | 13751043 | 813  | 52 | 15 |
| GTGGTGAGAC  | GTGGTGAGACCTTC                                |   |          |          |      |    |    |
| Cele.WB235  | Cele.WB235_3:13753764                         | 3 | 13753764 | 13754664 | 901  | 60 | 15 |
| TCGTGGTGAG  | TCGTGGTGAGACCTT                               |   |          |          |      |    |    |
| Cele.WB235  | Cele.WB235_3:13783590                         | 3 | 13783590 | 13783788 | 199  | 16 | 12 |
| CTTAGGCTTA  | CTTAGGCTTAGG                                  |   |          |          |      |    |    |
| Cele.WB235  | Cele.WB235_4:0                                | 4 | 0        | 137      | 138  | 11 | 12 |
| CCTAAGCCTA  | CCTAAGCCTAAG                                  |   |          |          |      |    |    |
| Cele.WB235  | Cele.WB235_4:119859                           | 4 | 119859   | 120107   | 249  | 13 | 19 |
| TGGTTGAGGC  | TGGTTGAGGCTCACAATTT                           |   |          |          |      |    |    |
| Cele.WB235  | Cele.WB235_4:122695                           | 4 | 122695   | 123566   | 872  | 28 | 19 |
| TTGGTTGAGG  | TTGGTTGAGGCTCACAATT                           |   |          |          |      |    |    |
| Cele.WB235  | Cele.WB235_4:124390                           | 4 | 124390   | 125403   | 1014 | 21 | 22 |
| TTGGTTGAGG  | TTGGTTGAGGCTCTCTGGATTT                        |   |          |          |      |    |    |
| Cele.WB235  | Cele.WB235_4:154583                           | 4 | 154583   | 154709   | 127  | 8  | 14 |
| CCTAAGCCTA  | CCTAAGCCTAAGGT                                |   |          |          |      |    |    |
| Cele.WB235  | Cele.WB235_4:180606                           | 4 | 180606   | 180739   | 134  | 7  | 19 |
| CCTCAACCAA  | CCTCAACCAAAATTCTGAG                           |   |          |          |      |    |    |
| Cele.WB235  | Cele.WB235_4:195511                           | 4 | 195511   | 196615   | 1105 | 53 | 20 |
| CTCAACCAAAA | CTCAACCAAAAATCCTTAGC                          |   |          |          |      |    |    |
| Cele.WB235  | Cele.WB235_4:215697                           | 4 | 215697   | 216357   | 661  | 32 | 20 |
| CTCAGCCTCA  | CTCAGCCTCAATCAAAAATT                          |   |          |          |      |    |    |
| Cele.WB235  | Cele.WB235_4:229906                           | 4 | 229906   | 231132   | 1227 | 63 | 18 |
| CTCAACCAAAA | CTCAACCAAACTCTTAGC                            |   |          |          |      |    |    |
| Cele.WB235  | Cele.WB235_4:236164                           | 4 | 236164   | 236448   | 285  | 12 | 22 |
| TGAGGCTCTC  | TGAGGCTCTCTAGATTTTGGT                         |   |          |          |      |    |    |
| Cele.WB235  | Cele.WB235_4:238538                           | 4 | 238538   | 239383   | 846  | 8  | 18 |
| AGCCTCAACC  | AGCCTCAACCAAATTCCTT                           |   |          |          |      |    |    |
| Cele.WB235  | Cele.WB235_4:280698                           | 4 | 280698   | 281177   | 480  | 13 | 37 |
| TTGGCGGGAA  | TTGGCGGGAATTCAAAATTTAATTTTGAACATATT           |   |          |          |      |    |    |
| Cele.WB235  | Cele.WB235_4:281265                           | 4 | 281265   | 281745   | 481  | 32 | 15 |
| TCGTGGTGAG  | TCGTGGAGAGACCTT                               |   |          |          |      |    |    |
| Cele.WB235  | Cele.WB235_4:349715                           | 4 | 349715   | 350206   | 492  | 11 | 45 |
| GAAGGATCAG  | GAAGGATCAGAACATCAGGAGGTACCCATGTGATCATTCGGCTCT |   |          |          |      |    |    |
| Cele.WB235  | Cele.WB235_4:382116                           | 4 | 382116   | 382388   | 273  | 8  | 34 |
| TTGCAGGAAA  | TTGCAGGAAATTTCAATTACCGCAATTTGCCGGT            |   |          |          |      |    |    |
| Cele.WB235  | Cele.WB235_4:385463                           | 4 | 385463   | 385525   | 63   | 4  | 15 |
| TCCCCTTTTC  | TCCCCTTTTCGTATC                               |   |          |          |      |    |    |



|             |                                                                                                        |   |         |         |      |    |     |
|-------------|--------------------------------------------------------------------------------------------------------|---|---------|---------|------|----|-----|
| Cele.WB235  | Cele.WB235_4:545946                                                                                    | 4 | 545946  | 546072  | 127  | 9  | 12  |
| TAGGCTTAGG  | TAGGCTTAGGTT                                                                                           |   |         |         |      |    |     |
| Cele.WB235  | Cele.WB235_4:594389                                                                                    | 4 | 594389  | 594607  | 219  | 10 | 16  |
| AGGCATGTAG  | AGGCATGTAGGCATGT                                                                                       |   |         |         |      |    |     |
| Cele.WB235  | Cele.WB235_4:628375                                                                                    | 4 | 628375  | 628467  | 93   | 6  | 15  |
| TCCCCTTTTC  | TCCCCTTTTCGTTGC                                                                                        |   |         |         |      |    |     |
| Cele.WB235  | Cele.WB235_4:640232                                                                                    | 4 | 640232  | 640313  | 82   | 4  | 15  |
| TAAGCCTAAG  | TAAGCCTAAGCCAC                                                                                         |   |         |         |      |    |     |
| Cele.WB235  | Cele.WB235_4:688812                                                                                    | 4 | 688812  | 698192  | 9381 | 92 | 102 |
| TTGCTGCAGC  | TTGCTGCAGCATATCTTTCTCCAGTACCACCTTGATATGTCGAACGATTGATAGTTTGAGAATCAAGAGAATCAGTTGGACGATCAATTCCATCTTTGGGTC |   |         |         |      |    |     |
| Cele.WB235  | Cele.WB235_4:775288                                                                                    | 4 | 775288  | 775412  | 125  | 4  | 31  |
| CAAAAATCGG  | CAAAAATCGGGAAATTTTCACAAAAAATGT                                                                         |   |         |         |      |    |     |
| Cele.WB235  | Cele.WB235_4:977829                                                                                    | 4 | 977829  | 978532  | 704  | 35 | 19  |
| CAATAATTTTC | CAATAATTTCCCAAAAAAT                                                                                    |   |         |         |      |    |     |
| Cele.WB235  | Cele.WB235_4:1069432                                                                                   | 4 | 1069432 | 1069486 | 55   | 4  | 12  |
| AGCCTAAGCC  | AGCCTAAGCCTA                                                                                           |   |         |         |      |    |     |
| Cele.WB235  | Cele.WB235_4:1071381                                                                                   | 4 | 1071381 | 1071429 | 49   | 4  | 12  |
| AGGCTTAGGC  | AGGCTTAGGCTT                                                                                           |   |         |         |      |    |     |
| Cele.WB235  | Cele.WB235_4:1153760                                                                                   | 4 | 1153760 | 1154039 | 280  | 7  | 40  |
| ATTTTCTAG   | ATTTTCTAGAAAGTTCTGGAACATTCAGACTTTTCCCA                                                                 |   |         |         |      |    |     |
| Cele.WB235  | Cele.WB235_4:1153661                                                                                   | 4 | 1153661 | 1154193 | 533  | 4  | 35  |
| AAAATATTTT  | AAAATATTTTTCACAGAAAATTTAAATTTCCCTCC                                                                    |   |         |         |      |    |     |
| Cele.WB235  | Cele.WB235_4:1154252                                                                                   | 4 | 1154252 | 1154492 | 241  | 16 | 15  |
| GGTCTCACCA  | GGTCTCACACGATG                                                                                         |   |         |         |      |    |     |
| Cele.WB235  | Cele.WB235_4:1153773                                                                                   | 4 | 1153773 | 1154667 | 895  | 10 | 40  |
| GTTCTGGAAC  | GTTCTGGAACATTCAGACTTTTCCCAATTTTCTAGAAA                                                                 |   |         |         |      |    |     |
| Cele.WB235  | Cele.WB235_4:1154757                                                                                   | 4 | 1154757 | 1155014 | 258  | 8  | 11  |
| GTAATCCTAC  | GTAATCCTACC                                                                                            |   |         |         |      |    |     |
| Cele.WB235  | Cele.WB235_4:1295080                                                                                   | 4 | 1295080 | 1295440 | 361  | 9  | 36  |
| TTATTTTCTG  | TTATTTTCTGACAAATTGCCGTTTGCCGGAATTT                                                                     |   |         |         |      |    |     |
| Cele.WB235  | Cele.WB235_4:1299931                                                                                   | 4 | 1299931 | 1300254 | 324  | 8  | 36  |
| TTTGCCGGAA  | TTTGTCGGAAATTTTATTTTCTGACAAATTGCCGG                                                                    |   |         |         |      |    |     |
| Cele.WB235  | Cele.WB235_4:1344791                                                                                   | 4 | 1344791 | 1345475 | 685  | 20 | 34  |
| ATTTCGCCGCC | ATTTCGCCCAAATTTTTCAGTGAAAATTTGA                                                                        |   |         |         |      |    |     |
| Cele.WB235  | Cele.WB235_4:1345560                                                                                   | 4 | 1345560 | 1345725 | 166  | 11 | 15  |
| CCACGATGGG  | CCACGATGGGTCTCG                                                                                        |   |         |         |      |    |     |
| Cele.WB235  | Cele.WB235_4:1348897                                                                                   | 4 | 1348897 | 1349230 | 334  | 9  | 34  |
| ATTGCCGGAA  | ATTGCCGGAATTCAAATTCCTAGCAAATCGGCAA                                                                     |   |         |         |      |    |     |
| Cele.WB235  | Cele.WB235_4:1355992                                                                                   | 4 | 1355992 | 1356408 | 417  | 8  | 12  |
| TAGGCTTAGG  | TAGGCTTAGGCG                                                                                           |   |         |         |      |    |     |
| Cele.WB235  | Cele.WB235_4:1415278                                                                                   | 4 | 1415278 | 1415575 | 298  | 15 | 21  |
| AAAATTGACT  | AAAATCGACTAAAAATCGTCA                                                                                  |   |         |         |      |    |     |
| Cele.WB235  | Cele.WB235_4:1429990                                                                                   | 4 | 1429990 | 1430044 | 55   | 4  | 12  |
| CATAGGCATA  | CATAGGCATAGA                                                                                           |   |         |         |      |    |     |
| Cele.WB235  | Cele.WB235_4:1438688                                                                                   | 4 | 1438688 | 1438742 | 55   | 4  | 12  |
| TATATGTATA  | TATATGTATATG                                                                                           |   |         |         |      |    |     |
| Cele.WB235  | Cele.WB235_4:1440391                                                                                   | 4 | 1440391 | 1440556 | 166  | 11 | 15  |
| AGACCCATCG  | AGACCCATCGTGGTG                                                                                        |   |         |         |      |    |     |
| Cele.WB235  | Cele.WB235_4:1447227                                                                                   | 4 | 1447227 | 1447319 | 93   | 6  | 15  |
| TCCCCTTTTC  | TCCCCTTTTCGTATC                                                                                        |   |         |         |      |    |     |
| Cele.WB235  | Cele.WB235_4:1476030                                                                                   | 4 | 1476030 | 1477123 | 1094 | 29 | 35  |
| AAAAAATTTT  | AAAAAATTTTGGCGGAAATTCAAATTTTCAGTGA                                                                     |   |         |         |      |    |     |

|             |                                                                                                      |   |         |         |      |     |     |
|-------------|------------------------------------------------------------------------------------------------------|---|---------|---------|------|-----|-----|
| Cele.WB235  | Cele.WB235_4:1477245                                                                                 | 4 | 1477245 | 1477418 | 174  | 5   | 34  |
| GAAAAATTGGA | GAAAAATTGAATTTCCCGCCAAAATTTTTCCTACT                                                                  |   |         |         |      |     |     |
| Cele.WB235  | Cele.WB235_4:1477450                                                                                 | 4 | 1477450 | 1477555 | 106  | 7   | 15  |
| CTCACCACGA  | CTCACCACGATGGGT                                                                                      |   |         |         |      |     |     |
| Cele.WB235  | Cele.WB235_4:1494116                                                                                 | 4 | 1494116 | 1494472 | 357  | 5   | 12  |
| AGGCTTAGGC  | AGGCTTAGGCCT                                                                                         |   |         |         |      |     |     |
| Cele.WB235  | Cele.WB235_4:1515989                                                                                 | 4 | 1515989 | 1516221 | 233  | 8   | 29  |
| CCACCCGGGA  | CCACCCGGGAGGCGTCGGCTGCTCTAAGC                                                                        |   |         |         |      |     |     |
| Cele.WB235  | Cele.WB235_4:1543828                                                                                 | 4 | 1543828 | 1544203 | 376  | 4   | 94  |
| TCCCATTGAT  | TCCCATTGATTGTCTACAAAGGGCATCGAAAAGCACCCAATATTTGGAGAACAGAAGATTTTGAAGAATTACTGCCTTCAGAAATGGACAATTT       |   |         |         |      |     |     |
| Cele.WB235  | Cele.WB235_4:1565274                                                                                 | 4 | 1565274 | 1565421 | 148  | 7   | 21  |
| CCATAGGTGG  | CCATAGGTGGAAGATCTCATG                                                                                |   |         |         |      |     |     |
| Cele.WB235  | Cele.WB235_4:1569894                                                                                 | 4 | 1569894 | 1570719 | 826  | 7   | 101 |
| TTGATTTTTC  | TTGATTTTTCGTCTTTTGAAGGGATATTGGTTTCGGGGTAGTGGGCGGATATGGTCGGGGTACTGTAGGTATACGGTAGGGTTACTGTAGTTTGGAAATT |   |         |         |      |     |     |
| Cele.WB235  | Cele.WB235_4:1624502                                                                                 | 4 | 1624502 | 1624593 | 92   | 6   | 14  |
| ACTACACACT  | ACTACACACTACAC                                                                                       |   |         |         |      |     |     |
| Cele.WB235  | Cele.WB235_4:1628395                                                                                 | 4 | 1628395 | 1628484 | 90   | 6   | 12  |
| TTAGGCTTAG  | TTAGGCTTCGGC                                                                                         |   |         |         |      |     |     |
| Cele.WB235  | Cele.WB235_4:1632727                                                                                 | 4 | 1632727 | 1632835 | 109  | 9   | 12  |
| CTTAAGCTTA  | CTTAAGCTTAGG                                                                                         |   |         |         |      |     |     |
| Cele.WB235  | Cele.WB235_4:1639384                                                                                 | 4 | 1639384 | 1639487 | 104  | 5   | 23  |
| ATTTAATTAA  | ATTTATTTAATTAAATTAATTT                                                                               |   |         |         |      |     |     |
| Cele.WB235  | Cele.WB235_4:1654913                                                                                 | 4 | 1654913 | 1655123 | 211  | 6   | 35  |
| ATTTCCGGCA  | ATTTCCGGCAAATCGGCAATATGCCAAAAATGGAT                                                                  |   |         |         |      |     |     |
| Cele.WB235  | Cele.WB235_4:1681168                                                                                 | 4 | 1681168 | 1681390 | 223  | 6   | 37  |
| CGCCAAAATG  | CGCCAAAATGATTCCAAAAAATTAAAAATTGAATTCC                                                                |   |         |         |      |     |     |
| Cele.WB235  | Cele.WB235_4:1689083                                                                                 | 4 | 1689083 | 1689293 | 211  | 11  | 12  |
| CTAAGCCTAA  | CTAAGCCTAATA                                                                                         |   |         |         |      |     |     |
| Cele.WB235  | Cele.WB235_4:1715069                                                                                 | 4 | 1715069 | 1715131 | 63   | 4   | 15  |
| CGAAAAGGGG  | CGAAAAGGGGATCTG                                                                                      |   |         |         |      |     |     |
| Cele.WB235  | Cele.WB235_4:1740517                                                                                 | 4 | 1740517 | 1740917 | 401  | 20  | 20  |
| CAGAAAAATC  | CAGAAAAATCAATAAATTCT                                                                                 |   |         |         |      |     |     |
| Cele.WB235  | Cele.WB235_4:1752199                                                                                 | 4 | 1752199 | 1752289 | 91   | 5   | 12  |
| TAAGCCTAAG  | TAAGCCTAAGAC                                                                                         |   |         |         |      |     |     |
| Cele.WB235  | Cele.WB235_4:1762607                                                                                 | 4 | 1762607 | 1762703 | 97   | 5   | 16  |
| CACGTAGGCA  | CACGTAAAGCACGTAGG                                                                                    |   |         |         |      |     |     |
| Cele.WB235  | Cele.WB235_4:1785293                                                                                 | 4 | 1785293 | 1785383 | 91   | 7   | 12  |
| TTAGGATTAG  | TTAGGATTAGGA                                                                                         |   |         |         |      |     |     |
| Cele.WB235  | Cele.WB235_4:1787801                                                                                 | 4 | 1787801 | 1788241 | 441  | 26  | 16  |
| TAGGCACGTA  | TAGGTACGTAGGCACG                                                                                     |   |         |         |      |     |     |
| Cele.WB235  | Cele.WB235_4:1848441                                                                                 | 4 | 1848441 | 1848937 | 497  | 18  | 21  |
| TGTCGATTTA  | TGTCGATTTACGGGGTTTCAG                                                                                |   |         |         |      |     |     |
| Cele.WB235  | Cele.WB235_4:1890247                                                                                 | 4 | 1890247 | 1890331 | 85   | 5   | 12  |
| TAAGCCTAAG  | TAAGTCTAAGCT                                                                                         |   |         |         |      |     |     |
| Cele.WB235  | Cele.WB235_4:1928447                                                                                 | 4 | 1928447 | 1928762 | 316  | 8   | 35  |
| GAAATTTTCA  | GAAATTTTCAATTCCGGCAATTCGCCGATTTGACG                                                                  |   |         |         |      |     |     |
| Cele.WB235  | Cele.WB235_4:1931275                                                                                 | 4 | 1931275 | 1932180 | 906  | 26  | 35  |
| CATTTTCGCC  | CATTTTCGCCGAATTGCCGGTTTGCCGGAAATTTTC                                                                 |   |         |         |      |     |     |
| Cele.WB235  | Cele.WB235_4:1931275                                                                                 | 4 | 1931275 | 1933389 | 2115 | 50  | 35  |
| CATTTTCGCC  | CATTTTCGCCGAATTGCCGGTTTGCCGGAAATTTTC                                                                 |   |         |         |      |     |     |
| Cele.WB235  | Cele.WB235_4:1949738                                                                                 | 4 | 1949738 | 1952318 | 2581 | 113 | 21  |
| GTAAATCTAC  | GTAAATCTACAGTAATCCCTC                                                                                |   |         |         |      |     |     |

|                                                                                                                                       |                                                                                                                                     |   |         |         |      |    |     |
|---------------------------------------------------------------------------------------------------------------------------------------|-------------------------------------------------------------------------------------------------------------------------------------|---|---------|---------|------|----|-----|
| Cele.WB235                                                                                                                            | Cele.WB235_4:1965986                                                                                                                | 4 | 1965986 | 1967712 | 1727 | 15 | 80  |
| AATTTCTCAA                                                                                                                            | AATTTCTCAATAGCGCGCCTTGCAACATCCGAACGGCGCGAAATTTGAATTTTGGCCATAAAATAACGAAAATCGGCA                                                      |   |         |         |      |    |     |
| Cele.WB235                                                                                                                            | Cele.WB235_4:2096897                                                                                                                | 4 | 2096897 | 2096972 | 76   | 5  | 15  |
| GGGTCTCACC                                                                                                                            | GGGTCTCGCCACGAT                                                                                                                     |   |         |         |      |    |     |
| Cele.WB235                                                                                                                            | Cele.WB235_4:2135958                                                                                                                | 4 | 2135958 | 2136208 | 251  | 6  | 40  |
| TTCCAGAATT                                                                                                                            | TTCCAGAATTTTCTCGAATATTCCAGAAGCTTCTAGAACA                                                                                            |   |         |         |      |    |     |
| Cele.WB235                                                                                                                            | Cele.WB235_4:2136323                                                                                                                | 4 | 2136323 | 2136466 | 144  | 5  | 11  |
| CTACAGTACC                                                                                                                            | CTACAGTACTA                                                                                                                         |   |         |         |      |    |     |
| Cele.WB235                                                                                                                            | Cele.WB235_4:2140998                                                                                                                | 4 | 2140998 | 2141533 | 536  | 8  | 43  |
| TTGCCGAAA                                                                                                                             | TTGCCGAAATTTTCAATCGCGGCATTTTGCCGGTTTGCTCAT                                                                                          |   |         |         |      |    |     |
| Cele.WB235                                                                                                                            | Cele.WB235_4:2156341                                                                                                                | 4 | 2156341 | 2157203 | 863  | 38 | 21  |
| GATTTACGGG                                                                                                                            | GATTTACGGGATGAAAATGTG                                                                                                               |   |         |         |      |    |     |
| Cele.WB235                                                                                                                            | Cele.WB235_4:2182563                                                                                                                | 4 | 2182563 | 2182888 | 326  | 13 | 21  |
| AAAATAGCTT                                                                                                                            | AAAATAGCTGAAAATTCATA                                                                                                                |   |         |         |      |    |     |
| Cele.WB235                                                                                                                            | Cele.WB235_4:2244962                                                                                                                | 4 | 2244962 | 2245187 | 226  | 15 | 15  |
| CGATGGGTCT                                                                                                                            | CGATGGGTCTACCA                                                                                                                      |   |         |         |      |    |     |
| Cele.WB235                                                                                                                            | Cele.WB235_4:2245441                                                                                                                | 4 | 2245441 | 2245572 | 132  | 4  | 11  |
| GTACTCCTAC                                                                                                                            | GTAATCCTACC                                                                                                                         |   |         |         |      |    |     |
| Cele.WB235                                                                                                                            | Cele.WB235_4:2393736                                                                                                                | 4 | 2393736 | 2396081 | 2346 | 23 | 70  |
| AAAAATCGAT                                                                                                                            | AAAAATCGATGTTTTGAAGTTTTTCTCAATAGAGCGCACTTTCAACAGCGAGAAATTTGAATTTTCCACC                                                              |   |         |         |      |    |     |
| Cele.WB235                                                                                                                            | Cele.WB235_4:2397301                                                                                                                | 4 | 2397301 | 2398030 | 730  | 7  | 104 |
| CCTGCGAAAG                                                                                                                            | CCTGCGAAAGCAAATCTCTGGCCTGACGGAGGCCAGCTAACTCTCTCCCTTAAGCCTTCGGGTGCTTCTCGGTGAATTTTGGGTCTGTGAGGT                                       |   |         |         |      |    |     |
| Cele.WB235                                                                                                                            | Cele.WB235_4:2431055                                                                                                                | 4 | 2431055 | 2431771 | 717  | 5  | 144 |
| TTCTAGGCCA                                                                                                                            | TTCTAGGCCCAATTGGAATCATCATAACTTGGCTTAAAAATCCAGATTTTTGGAGTCTGGTACCTGCAACATGTTGCCCTGTAGTTTTTCTACAAGTTAGGATATATTAATTTTTGGTGGCCTAAAAGTCC |   |         |         |      |    |     |
| AAATTATGGAT                                                                                                                           |                                                                                                                                     |   |         |         |      |    |     |
| Cele.WB235                                                                                                                            | Cele.WB235_4:2573920                                                                                                                | 4 | 2573920 | 2576033 | 2114 | 13 | 164 |
| CTTTTTTCTT                                                                                                                            |                                                                                                                                     |   |         |         |      |    |     |
| CTTTTTTCTTTTATAAACTGTTTAGCATAGTCAATATACCAGAAAATACCAAACAAAGTATGCTATCTTGTACGAAAGATTATTTTAAAAAATTCAGAAAATGCATCTAAAGCGGTTTTTTTTCAAAAAAT   |                                                                                                                                     |   |         |         |      |    |     |
| Cele.WB235                                                                                                                            | Cele.WB235_4:2650676                                                                                                                | 4 | 2650676 | 2650942 | 267  | 11 | 19  |
| CGCCAAGTAT                                                                                                                            | CGCCAAGTGTCCGAAAATA                                                                                                                 |   |         |         |      |    |     |
| Cele.WB235                                                                                                                            | Cele.WB235_4:2675283                                                                                                                | 4 | 2675283 | 2676104 | 822  | 4  | 175 |
| AACTTGTGAC                                                                                                                            |                                                                                                                                     |   |         |         |      |    |     |
| AACTTGTGACGGTGGGTATACATTTTATGTTTTTAAATTGTTTCGAAAACCTTCATTTCTGTCATTTGGTGAAGTTTCAAAAATTTGTGAATCTAGTTTTTGAAAAAATTTAAATTTGTGGCAATTTCACCGA |                                                                                                                                     |   |         |         |      |    |     |
| TTTTTCGTGAATTTCCGAGCTAAAAATGAAAAATTCATTGTG                                                                                            |                                                                                                                                     |   |         |         |      |    |     |
| Cele.WB235                                                                                                                            | Cele.WB235_4:2694935                                                                                                                | 4 | 2694935 | 2695125 | 191  | 5  | 40  |
| GAATTTTCCA                                                                                                                            | GAATTTTCCAGAAAGTTCTAGAAAATTCAGAAATTTTTC                                                                                             |   |         |         |      |    |     |
| Cele.WB235                                                                                                                            | Cele.WB235_4:2702010                                                                                                                | 4 | 2702010 | 2702785 | 776  | 31 | 21  |
| TTTGGATTTT                                                                                                                            | TTTGGATTTTTAGGCTTTAAA                                                                                                               |   |         |         |      |    |     |
| Cele.WB235                                                                                                                            | Cele.WB235_4:2754343                                                                                                                | 4 | 2754343 | 2754722 | 380  | 12 | 11  |
| TACTGTAGGA                                                                                                                            | TACTGTAGGAG                                                                                                                         |   |         |         |      |    |     |
| Cele.WB235                                                                                                                            | Cele.WB235_4:2754821                                                                                                                | 4 | 2754821 | 2756571 | 1751 | 49 | 40  |
| TTCTGGAAAA                                                                                                                            | TTCTGGAAAAATTCGAGAAAAATCTGGCATATTCCAGAACC                                                                                           |   |         |         |      |    |     |
| Cele.WB235                                                                                                                            | Cele.WB235_4:2815904                                                                                                                | 4 | 2815904 | 2816246 | 343  | 4  | 87  |
| TGAAGTCGTA                                                                                                                            | TGAAGTCGTAGGATTCTGTGTAGCGACTGGTGTCTGTACTCTGTGAAGGGGACGTGGCTTCTTCTGTTGAGTCAGGCTTCTGAGG                                               |   |         |         |      |    |     |
| Cele.WB235                                                                                                                            | Cele.WB235_4:2828548                                                                                                                | 4 | 2828548 | 2830536 | 1989 | 74 | 27  |
| CAGAGAGTAA                                                                                                                            | CAGAGAGTAAAAATAATCGGTGAAGCCA                                                                                                        |   |         |         |      |    |     |
| Cele.WB235                                                                                                                            | Cele.WB235_4:2851958                                                                                                                | 4 | 2851958 | 2852560 | 603  | 7  | 35  |
| TTTTCAATTC                                                                                                                            | TTTTCAATTCAAGCAATTTGCAGTTTTCCTGAAT                                                                                                  |   |         |         |      |    |     |
| Cele.WB235                                                                                                                            | Cele.WB235_4:2855122                                                                                                                | 4 | 2855122 | 2855338 | 217  | 5  | 24  |
| GCTTCTGGAG                                                                                                                            | GCTTCTGGAGCCACAGGTTATCCA                                                                                                            |   |         |         |      |    |     |

|            |                                               |   |         |         |      |     |    |
|------------|-----------------------------------------------|---|---------|---------|------|-----|----|
| Cele.WB235 | Cele.WB235_4:2861147                          | 4 | 2861147 | 2861589 | 443  | 12  | 19 |
| ACCTAGGCAT | ACCTATGCATAAGGCAGGC                           |   |         |         |      |     |    |
| Cele.WB235 | Cele.WB235_4:2872402                          | 4 | 2872402 | 2872909 | 508  | 14  | 35 |
| ATTCCGGCAA | ATTCCGGCAATTGCGGATTTGCGGAAAATTTTCA            |   |         |         |      |     |    |
| Cele.WB235 | Cele.WB235_4:2896505                          | 4 | 2896505 | 2896560 | 56   | 5   | 11 |
| TTGTTTACAA | TTGTTTACAAG                                   |   |         |         |      |     |    |
| Cele.WB235 | Cele.WB235_4:2953071                          | 4 | 2953071 | 2953413 | 343  | 19  | 16 |
| TAGGCATGTA | TAGGCATGTAGGAATG                              |   |         |         |      |     |    |
| Cele.WB235 | Cele.WB235_4:2964807                          | 4 | 2964807 | 2965022 | 216  | 4   | 43 |
| TTTGCCGGAA | TTTGCCGGAATTGAAAACCTACCGGCAAATCTGCAAACCTGGAAA |   |         |         |      |     |    |
| Cele.WB235 | Cele.WB235_4:2967003                          | 4 | 2967003 | 2967147 | 145  | 6   | 24 |
| GCGGCCGACA | GCGGCCGACACCTTACGGGTTGTA                      |   |         |         |      |     |    |
| Cele.WB235 | Cele.WB235_4:2981693                          | 4 | 2981693 | 2981773 | 81   | 4   | 16 |
| AGGTAGGAAG | AGATAGGAAGGTAGGA                              |   |         |         |      |     |    |
| Cele.WB235 | Cele.WB235_4:3004801                          | 4 | 3004801 | 3005510 | 710  | 20  | 34 |
| CCGATTTGCC | CCGATTTGCCGAAAATTTTATTCTGGCAAATTG             |   |         |         |      |     |    |
| Cele.WB235 | Cele.WB235_4:3050503                          | 4 | 3050503 | 3050595 | 93   | 6   | 15 |
| CGAAAAGGGG | CGAAAAGGGGATCTG                               |   |         |         |      |     |    |
| Cele.WB235 | Cele.WB235_4:3050770                          | 4 | 3050770 | 3050862 | 93   | 6   | 15 |
| TCCCCTTTTC | TCCCCTTTTCGTATC                               |   |         |         |      |     |    |
| Cele.WB235 | Cele.WB235_4:3052982                          | 4 | 3052982 | 3053132 | 151  | 8   | 15 |
| CACGATGGGT | CACGATGGGTCTCAT                               |   |         |         |      |     |    |
| Cele.WB235 | Cele.WB235_4:3098171                          | 4 | 3098171 | 3098319 | 149  | 4   | 37 |
| TGGCGGGAAT | TGGCGGGAATTCAAATTTTAATTTTCCGAAAACATTT         |   |         |         |      |     |    |
| Cele.WB235 | Cele.WB235_4:3149092                          | 4 | 3149092 | 3151000 | 1909 | 53  | 35 |
| GGCAAATTGC | GGCAAATTGCCGGAATTGAACATTTCCGGCAAATA           |   |         |         |      |     |    |
| Cele.WB235 | Cele.WB235_4:3166479                          | 4 | 3166479 | 3166602 | 124  | 7   | 12 |
| CCTAAGCCTA | CCTAAGCCTAAA                                  |   |         |         |      |     |    |
| Cele.WB235 | Cele.WB235_4:3184703                          | 4 | 3184703 | 3185093 | 391  | 5   | 16 |
| TACATGCCTA | TACATGCCTACATGCC                              |   |         |         |      |     |    |
| Cele.WB235 | Cele.WB235_4:3189159                          | 4 | 3189159 | 3189343 | 185  | 11  | 16 |
| CATGCCTACA | CATGCCTACACGCCTA                              |   |         |         |      |     |    |
| Cele.WB235 | Cele.WB235_4:3193096                          | 4 | 3193096 | 3194818 | 1723 | 67  | 16 |
| ATGCCTACAT | ATGCCTACATGCCTAC                              |   |         |         |      |     |    |
| Cele.WB235 | Cele.WB235_4:3195411                          | 4 | 3195411 | 3195573 | 163  | 6   | 18 |
| CCTTCGCCTA | CCTTCGCCTACCTGCATG                            |   |         |         |      |     |    |
| Cele.WB235 | Cele.WB235_4:3206393                          | 4 | 3206393 | 3209585 | 3193 | 168 | 19 |
| GCCTCACTCA | GCCTCACTCAAAATCCTCA                           |   |         |         |      |     |    |
| Cele.WB235 | Cele.WB235_4:3211749                          | 4 | 3211749 | 3211845 | 97   | 6   | 16 |
| AGGCATGTAG | AGGCATGTAGGCATGC                              |   |         |         |      |     |    |
| Cele.WB235 | Cele.WB235_4:3291067                          | 4 | 3291067 | 3291207 | 141  | 5   | 33 |
| CGGCATATGC | CGGCATATGCCGTGAATTTTAAATCGGCATAA              |   |         |         |      |     |    |
| Cele.WB235 | Cele.WB235_4:3309618                          | 4 | 3309618 | 3310597 | 980  | 27  | 35 |
| AATCGGCAAG | AATCGGCAAGTTACCGAAATTGAAAATTTCCGGCA           |   |         |         |      |     |    |
| Cele.WB235 | Cele.WB235_4:3366659                          | 4 | 3366659 | 3367988 | 1330 | 24  | 45 |
| TCTGATCCTT | TCTGATCCTTCAAGCTCCAAAGGATCAGAAGGTACCTCCTGGTGA |   |         |         |      |     |    |
| Cele.WB235 | Cele.WB235_4:3455422                          | 4 | 3455422 | 3455812 | 391  | 27  | 12 |
| TAAGCCTAAG | TAAGCCTAAGCT                                  |   |         |         |      |     |    |
| Cele.WB235 | Cele.WB235_4:3568013                          | 4 | 3568013 | 3568493 | 481  | 28  | 16 |
| TGCCTACATG | TGCCTACATGCCACA                               |   |         |         |      |     |    |
| Cele.WB235 | Cele.WB235_4:3608664                          | 4 | 3608664 | 3608778 | 115  | 7   | 12 |
| TTAGGCTTAG | TTAGGATTAGGA                                  |   |         |         |      |     |    |

|             |                                            |   |         |         |      |     |    |
|-------------|--------------------------------------------|---|---------|---------|------|-----|----|
| Cele.WB235  | Cele.WB235_4:3652033                       | 4 | 3652033 | 3652933 | 901  | 15  | 21 |
| TGTAGATTTA  | TGTAGATATACGGAATCTTG                       |   |         |         |      |     |    |
| Cele.WB235  | Cele.WB235_4:3670737                       | 4 | 3670737 | 3670797 | 61   | 4   | 15 |
| TCGTGGTGAG  | TCGTGGTGAGACCT                             |   |         |         |      |     |    |
| Cele.WB235  | Cele.WB235_4:3671203                       | 4 | 3671203 | 3671723 | 521  | 15  | 40 |
| TTTCTAGAAA  | TTTCTAGAAAATTTCGAGAAAATTCCGGATTGGTCCAGAAT  |   |         |         |      |     |    |
| Cele.WB235  | Cele.WB235_4:3696437                       | 4 | 3696437 | 3696683 | 247  | 6   | 41 |
| AAATTTTAA   | AAATTTTAAACGAGAAGTGGGCGAAAAATCATTCAAAAATTC |   |         |         |      |     |    |
| Cele.WB235  | Cele.WB235_4:3754942                       | 4 | 3754942 | 3755101 | 160  | 5   | 21 |
| TAGTTTGTAG  | TAGTTTGTAGTGTGCAGTGTG                      |   |         |         |      |     |    |
| Cele.WB235  | Cele.WB235_4:3825814                       | 4 | 3825814 | 3826008 | 195  | 12  | 16 |
| TAGGCATGTA  | TAGGCATGTAGGCATG                           |   |         |         |      |     |    |
| Cele.WB235  | Cele.WB235_4:3834124                       | 4 | 3834124 | 3834445 | 322  | 5   | 18 |
| ATTAGTATTG  | ATTAGTATTGCCCTACCT                         |   |         |         |      |     |    |
| Cele.WB235  | Cele.WB235_4:3991189                       | 4 | 3991189 | 3991890 | 702  | 6   | 12 |
| TAAGCCTAAG  | TAAGCCTATGCC                               |   |         |         |      |     |    |
| Cele.WB235  | Cele.WB235_4:4166741                       | 4 | 4166741 | 4166830 | 90   | 7   | 12 |
| GTTGCGTGTC  | GTTGCGTGTCGC                               |   |         |         |      |     |    |
| Cele.WB235  | Cele.WB235_4:4166744                       | 4 | 4166744 | 4167306 | 563  | 46  | 12 |
| GCGTGTCGCG  | GCGTGTCGCGTT                               |   |         |         |      |     |    |
| Cele.WB235  | Cele.WB235_4:4198521                       | 4 | 4198521 | 4198622 | 102  | 6   | 17 |
| GATGCCCCCT  | GATGCCCCCTCTGAACG                          |   |         |         |      |     |    |
| Cele.WB235  | Cele.WB235_4:4305710                       | 4 | 4305710 | 4305967 | 258  | 5   | 11 |
| GTACTGTAGG  | GTACTGTAGGA                                |   |         |         |      |     |    |
| Cele.WB235  | Cele.WB235_4:4325075                       | 4 | 4325075 | 4325582 | 508  | 13  | 11 |
| CTACAGTACT  | CTACAGTACTA                                |   |         |         |      |     |    |
| Cele.WB235  | Cele.WB235_4:4335057                       | 4 | 4335057 | 4335129 | 73   | 4   | 18 |
| TTTTTTGATA  | TTTTTTGATAATTCTTGA                         |   |         |         |      |     |    |
| Cele.WB235  | Cele.WB235_4:4355433                       | 4 | 4355433 | 4355651 | 219  | 5   | 35 |
| TTCCGGCAAA  | TTCCGGCAAAATCGACAATTGCGGAAAAACAGAGT        |   |         |         |      |     |    |
| Cele.WB235  | Cele.WB235_4:4401664                       | 4 | 4401664 | 4401741 | 78   | 5   | 15 |
| CGAAAAGGGG  | CGAAAAGGGGATCTG                            |   |         |         |      |     |    |
| Cele.WB235  | Cele.WB235_4:4416113                       | 4 | 4416113 | 4421995 | 5883 | 213 | 26 |
| GTCTAACTTT  | GTCTAACTTTGGAAATTCATCTAATG                 |   |         |         |      |     |    |
| Cele.WB235  | Cele.WB235_4:4459427                       | 4 | 4459427 | 4459589 | 163  | 12  | 12 |
| GCCTAAGCCT  | GCCTAAGACTAC                               |   |         |         |      |     |    |
| Cele.WB235  | Cele.WB235_4:4532759                       | 4 | 4532759 | 4533458 | 700  | 6   | 11 |
| GCAGTAGGCA  | GCAGTAGGAAG                                |   |         |         |      |     |    |
| Cele.WB235  | Cele.WB235_4:4554554                       | 4 | 4554554 | 4555060 | 507  | 13  | 11 |
| CTACAGTACT  | CTACAGTACTA                                |   |         |         |      |     |    |
| Cele.WB235  | Cele.WB235_4:4599072                       | 4 | 4599072 | 4599116 | 45   | 4   | 11 |
| TGACAACTTT  | TGACAACTTTG                                |   |         |         |      |     |    |
| Cele.WB235  | Cele.WB235_4:4702090                       | 4 | 4702090 | 4702167 | 78   | 5   | 15 |
| CGAAAAGGGG  | CGAAAAGGGGATCTG                            |   |         |         |      |     |    |
| Cele.WB235  | Cele.WB235_4:4702342                       | 4 | 4702342 | 4702434 | 93   | 6   | 15 |
| TCCCCTTTTC  | TCCCCTTTTTCGTATC                           |   |         |         |      |     |    |
| Cele.WB235  | Cele.WB235_4:4792114                       | 4 | 4792114 | 4792760 | 647  | 17  | 35 |
| TTGCCGGAAA  | TTGCCGGAAATTTTGGTTTCCAGCAAGTTGCCGAA        |   |         |         |      |     |    |
| Cele.WB235  | Cele.WB235_4:4898047                       | 4 | 4898047 | 4898612 | 566  | 18  | 15 |
| GAGACCCATC  | GAGACCCATCGTGGT                            |   |         |         |      |     |    |
| Cele.WB235  | Cele.WB235_4:4920724                       | 4 | 4920724 | 4920924 | 201  | 5   | 40 |
| TTCTAGAAAAG | TTCTAGAAAAGTTCTGGAACATTCTAGAATTTTCTCGATTT  |   |         |         |      |     |    |

|             |                                                                                   |   |         |         |      |     |    |
|-------------|-----------------------------------------------------------------------------------|---|---------|---------|------|-----|----|
| Cele.WB235  | Cele.WB235_4:4920980                                                              | 4 | 4920980 | 4921503 | 524  | 15  | 35 |
| TTTTCAGAAA  | TTTTCAGAAAATTTAAATTTCCCTCCAAAATATTT                                               |   |         |         |      |     |    |
| Cele.WB235  | Cele.WB235_4:4921570                                                              | 4 | 4921570 | 4922365 | 796  | 47  | 15 |
| GGGTCTCACC  | GGGTCTCACCACGAC                                                                   |   |         |         |      |     |    |
| Cele.WB235  | Cele.WB235_4:4923556                                                              | 4 | 4923556 | 4923766 | 211  | 6   | 35 |
| AATATTTTTTT | AATATTTTTTTTCAGAAAATTAAATTTCCCTCCAA                                               |   |         |         |      |     |    |
| Cele.WB235  | Cele.WB235_4:4923839                                                              | 4 | 4923839 | 4924634 | 796  | 47  | 15 |
| GGGTCTCACC  | GGGTCTCACCACGAC                                                                   |   |         |         |      |     |    |
| Cele.WB235  | Cele.WB235_4:4925825                                                              | 4 | 4925825 | 4926035 | 211  | 6   | 35 |
| AATATTTTTTT | AATATTTTTTTTCAGAAAATTAAATTTCCCTCCAA                                               |   |         |         |      |     |    |
| Cele.WB235  | Cele.WB235_4:4926108                                                              | 4 | 4926108 | 4926918 | 811  | 48  | 15 |
| GGGTCTCACC  | GGGTCTCACCACGAC                                                                   |   |         |         |      |     |    |
| Cele.WB235  | Cele.WB235_4:4996655                                                              | 4 | 4996655 | 4997045 | 391  | 8   | 39 |
| CCAACTGGAG  | CCAACTGGAGCCAGCACTATGACTGTGTCGGAGGAGCA                                            |   |         |         |      |     |    |
| Cele.WB235  | Cele.WB235_4:5060074                                                              | 4 | 5060074 | 5060274 | 201  | 12  | 16 |
| CTACGTGCCT  | CTACGTGCCTACGTGC                                                                  |   |         |         |      |     |    |
| Cele.WB235  | Cele.WB235_4:5273292                                                              | 4 | 5273292 | 5273664 | 373  | 18  | 12 |
| AGAAGGAGGA  | AGAAGGAGGAGA                                                                      |   |         |         |      |     |    |
| Cele.WB235  | Cele.WB235_4:5299099                                                              | 4 | 5299099 | 5299474 | 376  | 15  | 25 |
| TTTACTCTCT  | TTTACTCTCTGTCTTCACAGTATAT                                                         |   |         |         |      |     |    |
| Cele.WB235  | Cele.WB235_4:5302167                                                              | 4 | 5302167 | 5302359 | 193  | 10  | 12 |
| TCCTCTTTCT  | TCCTCTTTCTTC                                                                      |   |         |         |      |     |    |
| Cele.WB235  | Cele.WB235_4:5456641                                                              | 4 | 5456641 | 5456776 | 136  | 9   | 15 |
| CCACGATGGG  | CCACGATGGGTCTCG                                                                   |   |         |         |      |     |    |
| Cele.WB235  | Cele.WB235_4:5465022                                                              | 4 | 5465022 | 5467133 | 2112 | 44  | 48 |
| AATTCAATTT  | AATTCAATTTTGATTGCTGTAAATTTATATTTTCTGAAGATGAGC                                     |   |         |         |      |     |    |
| Cele.WB235  | Cele.WB235_4:5690583                                                              | 4 | 5690583 | 5690638 | 56   | 5   | 11 |
| TCCACTGACC  | TCCACTGACCG                                                                       |   |         |         |      |     |    |
| Cele.WB235  | Cele.WB235_4:5878242                                                              | 4 | 5878242 | 5878392 | 151  | 6   | 25 |
| CCAGAGAGTA  | CCAGAGAGTAAAGTATACTGGGAAG                                                         |   |         |         |      |     |    |
| Cele.WB235  | Cele.WB235_4:6009084                                                              | 4 | 6009084 | 6009409 | 326  | 6   | 55 |
| AAGAGTCCCC  | AAGAGTCCCCACACACTGAAAGGTTTAAAGGAATTTTTGAGGATTCCTAGGGTT                            |   |         |         |      |     |    |
| Cele.WB235  | Cele.WB235_4:6090427                                                              | 4 | 6090427 | 6090577 | 151  | 6   | 25 |
| TTTACTCTCT  | TTTACTCTCTGGCTTCACAGTATAT                                                         |   |         |         |      |     |    |
| Cele.WB235  | Cele.WB235_4:6210092                                                              | 4 | 6210092 | 6210227 | 136  | 7   | 19 |
| ATTGACAGAC  | ATTGACAGACGAAAAATAG                                                               |   |         |         |      |     |    |
| Cele.WB235  | Cele.WB235_4:6291557                                                              | 4 | 6291557 | 6291611 | 55   | 4   | 13 |
| TTTCATTTGT  | TTTCATTTGTAAT                                                                     |   |         |         |      |     |    |
| Cele.WB235  | Cele.WB235_4:6357804                                                              | 4 | 6357804 | 6361081 | 3278 | 132 | 25 |
| TAGAGTAAAT  | TAGAGTAAATAAATTAGCAGAACAT                                                         |   |         |         |      |     |    |
| Cele.WB235  | Cele.WB235_4:6469806                                                              | 4 | 6469806 | 6469955 | 150  | 10  | 12 |
| CAGAATATAT  | CAGAATATATTC                                                                      |   |         |         |      |     |    |
| Cele.WB235  | Cele.WB235_4:6599056                                                              | 4 | 6599056 | 6599139 | 84   | 4   | 22 |
| AAGCGGTAAC  | AAGCGGTAACGTCGTCTATATA                                                            |   |         |         |      |     |    |
| Cele.WB235  | Cele.WB235_4:6664978                                                              | 4 | 6664978 | 6665286 | 309  | 9   | 31 |
| CCCGCCAAAA  | CCCGCCAAAAATTTTTGAAAAAAATTTAATT                                                   |   |         |         |      |     |    |
| Cele.WB235  | Cele.WB235_4:6921936                                                              | 4 | 6921936 | 6922772 | 837  | 9   | 93 |
| TGCTTCTCGT  | TGCTTCTCGTCGTCCACCACCACCAGGGAAGTCCACCACCACCACCACTGGAGAACCACAGGATCTTTCTGGAGAAGGTAA |   |         |         |      |     |    |
| Cele.WB235  | Cele.WB235_4:7128107                                                              | 4 | 7128107 | 7129879 | 1773 | 156 | 11 |
| TGACAACTTC  | TGACAACTTCG                                                                       |   |         |         |      |     |    |
| Cele.WB235  | Cele.WB235_4:7441099                                                              | 4 | 7441099 | 7441297 | 199  | 5   | 40 |
| TCCAGAATTT  | TCCAGAATTTCTCGATTTTCTAGAAAGTTCTGGAACAT                                            |   |         |         |      |     |    |

|             |                                                     |   |          |          |      |     |    |
|-------------|-----------------------------------------------------|---|----------|----------|------|-----|----|
| Cele.WB235  | Cele.WB235_4:7441316                                | 4 | 7441316  | 7441526  | 211  | 6   | 35 |
| CAGAAAATTT  | CAGAAAATTTAAATTTCCCGCCAAAATATTTTCT                  |   |          |          |      |     |    |
| Cele.WB235  | Cele.WB235_4:7441099                                | 4 | 7441099  | 7441714  | 616  | 6   | 40 |
| TCCAGAATTT  | TCCAGAATTTTCTCGATTTTCTAGAAAGTTCTGGAACAT             |   |          |          |      |     |    |
| Cele.WB235  | Cele.WB235_4:7683397                                | 4 | 7683397  | 7683518  | 122  | 6   | 17 |
| CTCATTGCCT  | CTCATTGCCTACCCTTG                                   |   |          |          |      |     |    |
| Cele.WB235  | Cele.WB235_4:7727050                                | 4 | 7727050  | 7727263  | 214  | 5   | 51 |
| CCATCCGAAG  | CCATCCGAAGATCCTCAACCATCTGGCCCACCATCTCCGGGACCAGTGGAC |   |          |          |      |     |    |
| Cele.WB235  | Cele.WB235_4:7734990                                | 4 | 7734990  | 7736070  | 1081 | 24  | 45 |
| ACCATCAGGC  | ACCATCAGGCGGACCACCAGGACCATTGATCCATCAGGAGCACC        |   |          |          |      |     |    |
| Cele.WB235  | Cele.WB235_4:8015849                                | 4 | 8015849  | 8015941  | 93   | 5   | 15 |
| CGAAAAGGGG  | CGAAAAGGGGAGATA                                     |   |          |          |      |     |    |
| Cele.WB235  | Cele.WB235_4:8016116                                | 4 | 8016116  | 8016208  | 93   | 6   | 15 |
| TCCCCTTTTC  | TCCCCTTTTTCGTATC                                    |   |          |          |      |     |    |
| Cele.WB235  | Cele.WB235_4:8073709                                | 4 | 8073709  | 8073979  | 271  | 18  | 15 |
| CTCACCACGA  | CTCACCACGATGGGT                                     |   |          |          |      |     |    |
| Cele.WB235  | Cele.WB235_4:8255934                                | 4 | 8255934  | 8256202  | 269  | 6   | 45 |
| TCTGATCCTT  | TCTGATCCTTCAGCTCCGAAGGATCGTAAGGGTACCTCCTGATGG       |   |          |          |      |     |    |
| Cele.WB235  | Cele.WB235_4:8467114                                | 4 | 8467114  | 8467274  | 161  | 5   | 32 |
| TTGAATTTCC  | TTGAATTTCCCGCCAAAATTTTCAAAGAAATT                    |   |          |          |      |     |    |
| Cele.WB235  | Cele.WB235_4:8467000                                | 4 | 8467000  | 8468026  | 1027 | 15  | 40 |
| TTCTGGAACA  | TTCTGGAACATTCGAGAAATTTTCCCGATTTTCTAGAAAG            |   |          |          |      |     |    |
| Cele.WB235  | Cele.WB235_4:8467091                                | 4 | 8467091  | 8469338  | 2248 | 33  | 40 |
| TCCAGAATTT  | TCCAGCATTTTCTCAAATTTTCCAGAAGGTTCTGGAACAT            |   |          |          |      |     |    |
| Cele.WB235  | Cele.WB235_4:8469359                                | 4 | 8469359  | 8469569  | 211  | 6   | 35 |
| GAAAATTTAA  | GAAAATTTAAATTTCCCAACAAAATATTTTTTTCA                 |   |          |          |      |     |    |
| Cele.WB235  | Cele.WB235_4:8469615                                | 4 | 8469615  | 8470279  | 665  | 41  | 15 |
| TCTCACCACG  | TCTCACCACGATGGG                                     |   |          |          |      |     |    |
| Cele.WB235  | Cele.WB235_4:8565636                                | 4 | 8565636  | 8566140  | 505  | 13  | 11 |
| CTACAGTACT  | CTACAGTACTA                                         |   |          |          |      |     |    |
| Cele.WB235  | Cele.WB235_4:8572647                                | 4 | 8572647  | 8581868  | 9222 | 443 | 20 |
| CGATATAGCT  | CGATATAGCTATAAACAATA                                |   |          |          |      |     |    |
| Cele.WB235  | Cele.WB235_4:8789534                                | 4 | 8789534  | 8789636  | 103  | 6   | 17 |
| TTCATTTCCGT | TTCATTTCCGTGATTATT                                  |   |          |          |      |     |    |
| Cele.WB235  | Cele.WB235_4:8999493                                | 4 | 8999493  | 8999648  | 156  | 8   | 17 |
| AGGCAATGAG  | AGGCAATGAGAAAGAGT                                   |   |          |          |      |     |    |
| Cele.WB235  | Cele.WB235_4:9066182                                | 4 | 9066182  | 9067563  | 1382 | 81  | 15 |
| CTCACCACGA  | CTCACCACGAAGGGT                                     |   |          |          |      |     |    |
| Cele.WB235  | Cele.WB235_4:9410150                                | 4 | 9410150  | 9411415  | 1266 | 46  | 15 |
| ACGATGGGTC  | ACGACGGGTCTCACC                                     |   |          |          |      |     |    |
| Cele.WB235  | Cele.WB235_4:9411472                                | 4 | 9411472  | 9411612  | 141  | 5   | 30 |
| AATTTTCCAG  | AATTTTCCAGAAGGTTCTGGAACATTCCAG                      |   |          |          |      |     |    |
| Cele.WB235  | Cele.WB235_4:9411725                                | 4 | 9411725  | 9412004  | 280  | 10  | 11 |
| GTACTCCTAC  | GTACTCCTACA                                         |   |          |          |      |     |    |
| Cele.WB235  | Cele.WB235_4:9433776                                | 4 | 9433776  | 9433910  | 135  | 4   | 11 |
| CCCTACAGTA  | CCCTACAGTAA                                         |   |          |          |      |     |    |
| Cele.WB235  | Cele.WB235_4:10025402                               | 4 | 10025402 | 10025894 | 493  | 10  | 11 |
| TACTGTAGGG  | TACTGTAGGGG                                         |   |          |          |      |     |    |
| Cele.WB235  | Cele.WB235_4:10262913                               | 4 | 10262913 | 10263301 | 389  | 26  | 15 |
| GACCCATCGT  | GACCCATCGTGGTGA                                     |   |          |          |      |     |    |
| Cele.WB235  | Cele.WB235_4:10263336                               | 4 | 10263336 | 10264889 | 1554 | 42  | 35 |
| AATTCAAATT  | AATTCAAATTTTCAGTGAAAAAATTTTGGCGGGA                  |   |          |          |      |     |    |

|            |                                                                                                 |   |          |          |      |     |    |
|------------|-------------------------------------------------------------------------------------------------|---|----------|----------|------|-----|----|
| Cele.WB235 | Cele.WB235_4:10540321                                                                           | 4 | 10540321 | 10540705 | 385  | 5   | 77 |
| GGAAGCTTCA | GGAAGCTTCATCTTTTGAATTATAAAAAATAAAATTTTCATTTCAAATCAGTGTGTGCACTATCAAAAGTGTCCACT                   |   |          |          |      |     |    |
| Cele.WB235 | Cele.WB235_4:10681773                                                                           | 4 | 10681773 | 10682153 | 381  | 20  | 19 |
| ATTGTTACAC | ATTGTTACACGAAAAATAG                                                                             |   |          |          |      |     |    |
| Cele.WB235 | Cele.WB235_4:10943462                                                                           | 4 | 10943462 | 10944138 | 677  | 14  | 45 |
| AGCTCCGAAG | AGCTCCGAAGAATCAGAAGGGTACCTCCTGGTGATGTGATCCTTA                                                   |   |          |          |      |     |    |
| Cele.WB235 | Cele.WB235_4:10945693                                                                           | 4 | 10945693 | 10946234 | 542  | 12  | 45 |
| CTTCGGAGCT | CTTCGGAGCTTAAGGTTTCAGATCACCAGGAGGTACCCTTGTGATC                                                  |   |          |          |      |     |    |
| Cele.WB235 | Cele.WB235_4:10984356                                                                           | 4 | 10984356 | 10985109 | 754  | 4   | 11 |
| TTTGAAATAT | TTTGAAATATA                                                                                     |   |          |          |      |     |    |
| Cele.WB235 | Cele.WB235_4:10985445                                                                           | 4 | 10985445 | 10985549 | 105  | 4   | 26 |
| CCAGAGTCAC | CCAGAGTCACAATTTTTGGTGAACAA                                                                      |   |          |          |      |     |    |
| Cele.WB235 | Cele.WB235_4:11033628                                                                           | 4 | 11033628 | 11036077 | 2450 | 31  | 79 |
| GAAACTAAAA | GAAACTAAAACCTAATGAGACCCAGAATACTGCCGGTATTCTGTGAGGACTCATTAGGTAGAGAGGAGATTACAGAA                   |   |          |          |      |     |    |
| Cele.WB235 | Cele.WB235_4:11072392                                                                           | 4 | 11072392 | 11075919 | 3528 | 90  | 39 |
| TTATGGAAAA | TTATGGAAAAGTGGCTCTATAGCCACTAGAAATACCAGT                                                         |   |          |          |      |     |    |
| Cele.WB235 | Cele.WB235_4:11178974                                                                           | 4 | 11178974 | 11179067 | 94   | 6   | 15 |
| CGAAAAGGGG | CGAAAAGGGGATCTG                                                                                 |   |          |          |      |     |    |
| Cele.WB235 | Cele.WB235_4:11179242                                                                           | 4 | 11179242 | 11179304 | 63   | 4   | 15 |
| TCCCCTTTTC | TCCCCTTTTCGCAGA                                                                                 |   |          |          |      |     |    |
| Cele.WB235 | Cele.WB235_4:11610541                                                                           | 4 | 11610541 | 11615517 | 4977 | 199 | 25 |
| CATTACGGCA | CATTACGGCAGATTCTATAAATTGG                                                                       |   |          |          |      |     |    |
| Cele.WB235 | Cele.WB235_4:11615692                                                                           | 4 | 11615692 | 11615955 | 264  | 13  | 17 |
| AAAATCAAAC | AAAATCAAACCGGCGGA                                                                               |   |          |          |      |     |    |
| Cele.WB235 | Cele.WB235_4:12022220                                                                           | 4 | 12022220 | 12022489 | 270  | 10  | 11 |
| GTACTGTAGG | GTACTGTAGGG                                                                                     |   |          |          |      |     |    |
| Cele.WB235 | Cele.WB235_4:12022575                                                                           | 4 | 12022575 | 12022894 | 320  | 8   | 40 |
| TCCAGAACCT | TCCAGAACCTTCTGGAAAATTTCGAGAAAATTCTGGAATGT                                                       |   |          |          |      |     |    |
| Cele.WB235 | Cele.WB235_4:12023094                                                                           | 4 | 12023094 | 12025460 | 2367 | 74  | 32 |
| CGGGAATTCA | CGGGAATTCAAATTTTCTGTGAAAAATTTTGG                                                                |   |          |          |      |     |    |
| Cele.WB235 | Cele.WB235_4:12155676                                                                           | 4 | 12155676 | 12156286 | 611  | 8   | 35 |
| AAATTTGAAT | AAATTTGAATTTCCCGTCAAATCTTTTCTCAGA                                                               |   |          |          |      |     |    |
| Cele.WB235 | Cele.WB235_4:12169299                                                                           | 4 | 12169299 | 12171242 | 1944 | 24  | 59 |
| TTTTAAAAAT | TTTTAAAAATTTTGAAAACCAGTGAAGTCTTGATAATCCATATTTTCCATAATTCTCAG                                     |   |          |          |      |     |    |
| Cele.WB235 | Cele.WB235_4:12314464                                                                           | 4 | 12314464 | 12315037 | 574  | 6   | 96 |
| GGTTGATTTG | GGTTGATTTGCGGCACCTACAGATAGTGATCTGCTTCTTACCAATCTTCCCGTTACCGCCACGCACTAAAGCTCCAACTATTTTATTTTTTTG   |   |          |          |      |     |    |
| Cele.WB235 | Cele.WB235_4:12326778                                                                           | 4 | 12326778 | 12327098 | 321  | 18  | 16 |
| GTGCCTACGT | GTGCCTACGTGCCTAC                                                                                |   |          |          |      |     |    |
| Cele.WB235 | Cele.WB235_4:12500507                                                                           | 4 | 12500507 | 12500642 | 136  | 5   | 27 |
| ACAATAAAGT | ACAATAAAGTACTATGTATTACCGTAT                                                                     |   |          |          |      |     |    |
| Cele.WB235 | Cele.WB235_4:12584972                                                                           | 4 | 12584972 | 12585067 | 96   | 5   | 19 |
| AAAAATAGAT | AAAAATAGATTGGCAGACG                                                                             |   |          |          |      |     |    |
| Cele.WB235 | Cele.WB235_4:12621478                                                                           | 4 | 12621478 | 12621570 | 93   | 6   | 15 |
| CGAAAAGGGG | CGAAAAGGGGATCTG                                                                                 |   |          |          |      |     |    |
| Cele.WB235 | Cele.WB235_4:12621744                                                                           | 4 | 12621744 | 12621836 | 93   | 5   | 15 |
| TCCCCTTTTC | TCCCCTTTTCGTATC                                                                                 |   |          |          |      |     |    |
| Cele.WB235 | Cele.WB235_4:12638029                                                                           | 4 | 12638029 | 12638605 | 577  | 6   | 96 |
| CTTCTGGTAA | CTTCTGGTAACGTTCCCATAAATTGGGTAAATACCACTCATAAGTAACAGTATGGGACTGAAAAGATACTAAATGAGCTTATTCTAAGGGTGAAG |   |          |          |      |     |    |
| Cele.WB235 | Cele.WB235_4:12678404                                                                           | 4 | 12678404 | 12678576 | 173  | 5   | 35 |
| AAACCGGCAA | AAACCGGCAATTGCCGAAATTGCCGAAATTTCTCG                                                             |   |          |          |      |     |    |
| Cele.WB235 | Cele.WB235_4:12730503                                                                           | 4 | 12730503 | 12732683 | 2181 | 84  | 26 |
| CATTGCGGCG | CATTGCGGCGATTTTCGAAAAATGA                                                                       |   |          |          |      |     |    |



|                                                                                                                                     |                                                                                             |   |          |          |      |    |     |
|-------------------------------------------------------------------------------------------------------------------------------------|---------------------------------------------------------------------------------------------|---|----------|----------|------|----|-----|
| Cele.WB235                                                                                                                          | Cele.WB235_4:12891406                                                                       | 4 | 12891406 | 12891917 | 512  | 9  | 48  |
| TCATCTTCAG                                                                                                                          | TCATCTTCAGAAAATTATAAATTACGGGCAAATCAAAAATTAAATTGC                                            |   |          |          |      |    |     |
| Cele.WB235                                                                                                                          | Cele.WB235_4:12931758                                                                       | 4 | 12931758 | 12932786 | 1029 | 5  | 168 |
| TTTTTAAAAA                                                                                                                          |                                                                                             |   |          |          |      |    |     |
| TTTTTAAAAAATCTAGAATCCAAATCTATCAAACATTTCCGGAATTCGATAATTTTTATTTTTGTTTTTTGAGCCTACTAGTACCTGTGAAAATTGGAACCTGACACAAAAACCTCTCTAGCGCGGCTTAA |                                                                                             |   |          |          |      |    |     |
| ATTTACTTTCTGGCCACAACTTACCAATAATA                                                                                                    |                                                                                             |   |          |          |      |    |     |
| Cele.WB235                                                                                                                          | Cele.WB235_4:13007463                                                                       | 4 | 13007463 | 13008066 | 604  | 12 | 12  |
| GCTTGGGTTT                                                                                                                          | GCTTGGGTTTAG                                                                                |   |          |          |      |    |     |
| Cele.WB235                                                                                                                          | Cele.WB235_4:13007463                                                                       | 4 | 13007463 | 13008198 | 736  | 17 | 12  |
| GCTTGGGTTT                                                                                                                          | GCTTGGGTTTAG                                                                                |   |          |          |      |    |     |
| Cele.WB235                                                                                                                          | Cele.WB235_4:13115382                                                                       | 4 | 13115382 | 13116006 | 625  | 24 | 26  |
| ATTAGATGAA                                                                                                                          | ATTAGATGAATTTCCAAAGTTAGACC                                                                  |   |          |          |      |    |     |
| Cele.WB235                                                                                                                          | Cele.WB235_4:13222198                                                                       | 4 | 13222198 | 13222342 | 145  | 12 | 12  |
| TATACCTATA                                                                                                                          | TATACCCATACC                                                                                |   |          |          |      |    |     |
| Cele.WB235                                                                                                                          | Cele.WB235_4:13360500                                                                       | 4 | 13360500 | 13361979 | 1480 | 59 | 25  |
| TTTACTCTCT                                                                                                                          | TTTACTCTCTGGTTTCACAGAATAA                                                                   |   |          |          |      |    |     |
| Cele.WB235                                                                                                                          | Cele.WB235_4:13431343                                                                       | 4 | 13431343 | 13431418 | 76   | 5  | 15  |
| CACAGGAGGC                                                                                                                          | CACAGGAGGCTGGGA                                                                             |   |          |          |      |    |     |
| Cele.WB235                                                                                                                          | Cele.WB235_4:13462457                                                                       | 4 | 13462457 | 13462800 | 344  | 22 | 15  |
| ACCCATCGTG                                                                                                                          | ACCCATCGTGGCGAG                                                                             |   |          |          |      |    |     |
| Cele.WB235                                                                                                                          | Cele.WB235_4:13462892                                                                       | 4 | 13462892 | 13463563 | 672  | 18 | 35  |
| GAAATTTAAA                                                                                                                          | GAAATTTAAATTTTCTGTGAAAAATATTTTGGCGG                                                         |   |          |          |      |    |     |
| Cele.WB235                                                                                                                          | Cele.WB235_4:13463617                                                                       | 4 | 13463617 | 13463705 | 89   | 4  | 23  |
| AATATTTATT                                                                                                                          | AATATTTATTTATTTATTTAATA                                                                     |   |          |          |      |    |     |
| Cele.WB235                                                                                                                          | Cele.WB235_4:13462893                                                                       | 4 | 13462893 | 13464435 | 1543 | 25 | 35  |
| AAATTTAAAT                                                                                                                          | AAATTTAAATTTTCTGTGAAAAATATTTTGGCGGG                                                         |   |          |          |      |    |     |
| Cele.WB235                                                                                                                          | Cele.WB235_4:13464499                                                                       | 4 | 13464499 | 13464709 | 211  | 14 | 15  |
| CCACGATGGG                                                                                                                          | CCACGATGGGTCTCG                                                                             |   |          |          |      |    |     |
| Cele.WB235                                                                                                                          | Cele.WB235_4:13463828                                                                       | 4 | 13463828 | 13464877 | 1050 | 12 | 40  |
| GTTCTGGAAC                                                                                                                          | GTTCTGGAACACTCCAGAATTTTCCCGATTTTCTAGAAA                                                     |   |          |          |      |    |     |
| Cele.WB235                                                                                                                          | Cele.WB235_4:13464747                                                                       | 4 | 13464747 | 13465805 | 1059 | 13 | 27  |
| TTTTTAAAAT                                                                                                                          | TTTTTAAAATTCATATACCGTTCTAAC                                                                 |   |          |          |      |    |     |
| Cele.WB235                                                                                                                          | Cele.WB235_4:13478657                                                                       | 4 | 13478657 | 13478875 | 219  | 6  | 31  |
| AATTCAAATT                                                                                                                          | AATTCAAATTTTCTCAAAAAATTTTGGCGGG                                                             |   |          |          |      |    |     |
| Cele.WB235                                                                                                                          | Cele.WB235_4:13547778                                                                       | 4 | 13547778 | 13547822 | 45   | 4  | 11  |
| CACATTTTTT                                                                                                                          | CACATTTTTTTC                                                                                |   |          |          |      |    |     |
| Cele.WB235                                                                                                                          | Cele.WB235_4:13575701                                                                       | 4 | 13575701 | 13576041 | 341  | 30 | 11  |
| GCACATTTTT                                                                                                                          | GCACATTTTTCT                                                                                |   |          |          |      |    |     |
| Cele.WB235                                                                                                                          | Cele.WB235_4:13668023                                                                       | 4 | 13668023 | 13668625 | 603  | 12 | 40  |
| AAAATTCCTGG                                                                                                                         | AAAATTCCTGGAAAGCTCTAGAACCCTTTTGAAAAATTCGAG                                                  |   |          |          |      |    |     |
| Cele.WB235                                                                                                                          | Cele.WB235_4:13734177                                                                       | 4 | 13734177 | 13736953 | 2777 | 30 | 93  |
| AGGGCCGCAG                                                                                                                          | AGGGCCGCAGGCCGAACACTCTTGGAACCTGGGCTGGCTTTAATCCTATTCCAAGCAGATTGTTATTCCTCAAGCCTATCAACCAAGTTTG |   |          |          |      |    |     |
| Cele.WB235                                                                                                                          | Cele.WB235_4:13845937                                                                       | 4 | 13845937 | 13846071 | 135  | 6  | 11  |
| AGTACTGTAG                                                                                                                          | AGTACTGTAGG                                                                                 |   |          |          |      |    |     |
| Cele.WB235                                                                                                                          | Cele.WB235_4:13846283                                                                       | 4 | 13846283 | 13847033 | 751  | 45 | 15  |
| CCCATCGTGG                                                                                                                          | CCCATCGTGGCGAGA                                                                             |   |          |          |      |    |     |
| Cele.WB235                                                                                                                          | Cele.WB235_4:13847379                                                                       | 4 | 13847379 | 13847579 | 201  | 5  | 40  |
| AATGTTCCAG                                                                                                                          | AATGTTCCAGAACTTTCTAGAAAATCGAGAAAATCTGG                                                      |   |          |          |      |    |     |
| Cele.WB235                                                                                                                          | Cele.WB235_4:13861901                                                                       | 4 | 13861901 | 13862381 | 481  | 12 | 40  |
| CAGAACCTTC                                                                                                                          | CAGAACCTTCAGAAAATCCGAGAAAATCTGGAATGTTTC                                                     |   |          |          |      |    |     |
| Cele.WB235                                                                                                                          | Cele.WB235_4:13861930                                                                       | 4 | 13861930 | 13862600 | 671  | 11 | 40  |
| CTGGAATGTT                                                                                                                          | CTGGAATGTTCCAAAACCTTCTGGAATTTGAGAAAATG                                                      |   |          |          |      |    |     |

|                                                                     |                                                                                                                                       |   |          |          |      |    |     |
|---------------------------------------------------------------------|---------------------------------------------------------------------------------------------------------------------------------------|---|----------|----------|------|----|-----|
| Cele.WB235                                                          | Cele.WB235_4:13884400                                                                                                                 | 4 | 13884400 | 13884820 | 421  | 24 | 15  |
| ACGATGGGTC                                                          | ACGATGGGTCTCACC                                                                                                                       |   |          |          |      |    |     |
| Cele.WB235                                                          | Cele.WB235_4:13909776                                                                                                                 | 4 | 13909776 | 13910308 | 533  | 19 | 32  |
| CGACCTGCGA                                                          | CGACCTGCGACCTAGCGACCTGGGTCTGCTTTG                                                                                                     |   |          |          |      |    |     |
| Cele.WB235                                                          | Cele.WB235_4:13922018                                                                                                                 | 4 | 13922018 | 13922152 | 135  | 6  | 11  |
| AGTACTGTAG                                                          | AGTACTGTAGG                                                                                                                           |   |          |          |      |    |     |
| Cele.WB235                                                          | Cele.WB235_4:13922430                                                                                                                 | 4 | 13922430 | 13922519 | 90   | 6  | 15  |
| ACCCATCGTG                                                          | ACCCATCGTGGTGAG                                                                                                                       |   |          |          |      |    |     |
| Cele.WB235                                                          | Cele.WB235_4:13922549                                                                                                                 | 4 | 13922549 | 13923902 | 1354 | 39 | 35  |
| GGGAAATTTA                                                          | GGGAAATTTAAATTTTCTGAAAAAATATTTTGGC                                                                                                    |   |          |          |      |    |     |
| Cele.WB235                                                          | Cele.WB235_4:13964027                                                                                                                 | 4 | 13964027 | 13964143 | 117  | 4  | 29  |
| TACATTGCAA                                                          | TACATTGCAAGATTTTCTTACTCTGTAGG                                                                                                         |   |          |          |      |    |     |
| Cele.WB235                                                          | Cele.WB235_4:14205760                                                                                                                 | 4 | 14205760 | 14206748 | 989  | 13 | 76  |
| AATGCTAGAG                                                          | AATGCTAGAGGACACTCATTTGCACGAAGGGAAGTGGGAGAGACTGTGGAGTTGTCTGGTGTCTTTGTGCATGCTCG                                                         |   |          |          |      |    |     |
| Cele.WB235                                                          | Cele.WB235_4:14208040                                                                                                                 | 4 | 14208040 | 14209239 | 1200 | 70 | 14  |
| GCTATGCGCT                                                          | GCTATGCGCTGTTT                                                                                                                        |   |          |          |      |    |     |
| Cele.WB235                                                          | Cele.WB235_4:14209284                                                                                                                 | 4 | 14209284 | 14209609 | 326  | 13 | 25  |
| TAATGCCAAT                                                          | TAATGCCAATTTATAGAATCTGCCA                                                                                                             |   |          |          |      |    |     |
| Cele.WB235                                                          | Cele.WB235_4:14209637                                                                                                                 | 4 | 14209637 | 14209721 | 85   | 6  | 14  |
| AGCGTATAGC                                                          | AGCGTATAGCGTAT                                                                                                                        |   |          |          |      |    |     |
| Cele.WB235                                                          | Cele.WB235_4:14210874                                                                                                                 | 4 | 14210874 | 14215456 | 4583 | 61 | 76  |
| TCGTGCAAAG                                                          | TCGTGCAAAGGAGTGTCTCTAGCATTCGAGCATGCACAAAGACACCGACAACCTCCACAGTCTCTCCCACTTCCCT                                                          |   |          |          |      |    |     |
| Cele.WB235                                                          | Cele.WB235_4:14218012                                                                                                                 | 4 | 14218012 | 14218147 | 136  | 9  | 15  |
| GGGTCTCACC                                                          | GGGTCTCACCACGAT                                                                                                                       |   |          |          |      |    |     |
| Cele.WB235                                                          | Cele.WB235_4:14417231                                                                                                                 | 4 | 14417231 | 14419021 | 1791 | 7  | 200 |
| GAAAAAGTGA                                                          | GAAAAAGTGAATTTTCAGTCATACCTTGTAGACCACAATTTATATGCAAAATTAATAGATTTTCCAAACTTTGAAAATTAATTTCTGGCTTCAAACCTAACTTTTTTAAAAATCCCGTAGCCATTTTGTAGCA |   |          |          |      |    |     |
| GAATTTTATGTTCTATTAGAATTTCAAAGAGAGTTTCAAATAATTTTGAAACCATTAAGTTCAAGCA |                                                                                                                                       |   |          |          |      |    |     |
| Cele.WB235                                                          | Cele.WB235_4:14426797                                                                                                                 | 4 | 14426797 | 14427553 | 757  | 36 | 21  |
| CAACTACCAC                                                          | CAACTACCACAACCTACCGTAC                                                                                                                |   |          |          |      |    |     |
| Cele.WB235                                                          | Cele.WB235_4:14447004                                                                                                                 | 4 | 14447004 | 14447298 | 295  | 13 | 21  |
| ACTACCGTAC                                                          | ACTACCGTACCAACTACCACA                                                                                                                 |   |          |          |      |    |     |
| Cele.WB235                                                          | Cele.WB235_4:14476813                                                                                                                 | 4 | 14476813 | 14476978 | 166  | 11 | 15  |
| GACCCATCGT                                                          | GACCTATCGTGGCGA                                                                                                                       |   |          |          |      |    |     |
| Cele.WB235                                                          | Cele.WB235_4:14476805                                                                                                                 | 4 | 14476805 | 14480237 | 3433 | 67 | 15  |
| CGTGGTGAGA                                                          | CGTGGCGGAGACCTAT                                                                                                                      |   |          |          |      |    |     |
| Cele.WB235                                                          | Cele.WB235_4:14740244                                                                                                                 | 4 | 14740244 | 14740404 | 161  | 5  | 40  |
| TTTTCTAGAA                                                          | TTTTCTAGAAAATTCTGGACCATTCAGAACTTTCTCGGA                                                                                               |   |          |          |      |    |     |
| Cele.WB235                                                          | Cele.WB235_4:14740489                                                                                                                 | 4 | 14740489 | 14741012 | 524  | 15 | 35  |
| AAATTTGAAT                                                          | AAATTTGAATTTCCCGCCAAAATTGTTTGCACTGC                                                                                                   |   |          |          |      |    |     |
| Cele.WB235                                                          | Cele.WB235_4:14781306                                                                                                                 | 4 | 14781306 | 14781436 | 131  | 5  | 26  |
| TGGTTAGAGT                                                          | TGGTTAGAGTCATTATTTTAGGTGAA                                                                                                            |   |          |          |      |    |     |
| Cele.WB235                                                          | Cele.WB235_4:15034367                                                                                                                 | 4 | 15034367 | 15034488 | 122  | 9  | 11  |
| TGTGCAAAAA                                                          | TGTGCAAAAAAT                                                                                                                          |   |          |          |      |    |     |
| Cele.WB235                                                          | Cele.WB235_4:15059144                                                                                                                 | 4 | 15059144 | 15059784 | 641  | 16 | 40  |
| TTTTCTAGAA                                                          | TTTTCTAGAAAAGTTCTGGAACATTCAGAAAATTTCCCGAC                                                                                             |   |          |          |      |    |     |
| Cele.WB235                                                          | Cele.WB235_4:15060108                                                                                                                 | 4 | 15060108 | 15060798 | 691  | 39 | 15  |
| GGTCTCACCA                                                          | GGTCTCACCAACGATG                                                                                                                      |   |          |          |      |    |     |
| Cele.WB235                                                          | Cele.WB235_4:15166280                                                                                                                 | 4 | 15166280 | 15166460 | 181  | 11 | 15  |
| GAGACCCATC                                                          | GAGACCCATCGTGGC                                                                                                                       |   |          |          |      |    |     |
| Cele.WB235                                                          | Cele.WB235_4:15166547                                                                                                                 | 4 | 15166547 | 15166687 | 141  | 4  | 35  |
| AAATTTTCTG                                                          | AAATTTTCTGTGAAAAATATTTTGGCGGGAAATTT                                                                                                   |   |          |          |      |    |     |

|                                                                                                                                     |                                          |   |          |          |      |    |     |
|-------------------------------------------------------------------------------------------------------------------------------------|------------------------------------------|---|----------|----------|------|----|-----|
| Cele.WB235                                                                                                                          | Cele.WB235_4:15166752                    | 4 | 15166752 | 15167072 | 321  | 8  | 40  |
| GAATGTTCCA                                                                                                                          | GAATGTTCCAGAACTTTCTAGAACAATCGAGAAAAATCTG |   |          |          |      |    |     |
| Cele.WB235                                                                                                                          | Cele.WB235_4:15188409                    | 4 | 15188409 | 15188529 | 121  | 8  | 15  |
| GGTGAGACCC                                                                                                                          | GGTGAGACCCCTTCGT                         |   |          |          |      |    |     |
| Cele.WB235                                                                                                                          | Cele.WB235_4:15188545                    | 4 | 15188545 | 15190957 | 2413 | 70 | 34  |
| TTGGCGGGAA                                                                                                                          | TTGGCGGGAAATTCAAATTTTCAGTGAAAAAATT       |   |          |          |      |    |     |
| Cele.WB235                                                                                                                          | Cele.WB235_4:15199553                    | 4 | 15199553 | 15199645 | 93   | 6  | 15  |
| CGAAAAGGGG                                                                                                                          | CGAAAAGGGGATCTG                          |   |          |          |      |    |     |
| Cele.WB235                                                                                                                          | Cele.WB235_4:15199820                    | 4 | 15199820 | 15199897 | 78   | 5  | 15  |
| TCCCCTTTTC                                                                                                                          | TCCCCTTTTTCGTATC                         |   |          |          |      |    |     |
| Cele.WB235                                                                                                                          | Cele.WB235_4:15201340                    | 4 | 15201340 | 15201723 | 384  | 11 | 35  |
| GGGAAATTCA                                                                                                                          | GGGAAATTCAAATTTTCTAGTAAAAAATATTTTGGC     |   |          |          |      |    |     |
| Cele.WB235                                                                                                                          | Cele.WB235_4:15201392                    | 4 | 15201392 | 15202170 | 779  | 9  | 35  |
| GTAAAAAATA                                                                                                                          | GTAAAAAATATTTTGGGAGGAAATTCAAATTTTTA      |   |          |          |      |    |     |
| Cele.WB235                                                                                                                          | Cele.WB235_4:15225095                    | 4 | 15225095 | 15227378 | 2284 | 12 | 168 |
| AAAAACAAAA                                                                                                                          |                                          |   |          |          |      |    |     |
| AAAAACAAAAATAAAAAATTTTGAATGTTGGGAGAATTTTATAGATTTGGATTCTAGATTTTAAACAAATATTTTGGTAAGTTTCTGGACCTAGATATCAATTTTCAGATGCGCTAGAGGGGTTTTGTCT  |                                          |   |          |          |      |    |     |
| TGAATTCCAATTTCAACAGATATATACAGGCACAA                                                                                                 |                                          |   |          |          |      |    |     |
| Cele.WB235                                                                                                                          | Cele.WB235_4:15225869                    | 4 | 15225869 | 15227795 | 1927 | 11 | 168 |
| AACAAAAATA                                                                                                                          |                                          |   |          |          |      |    |     |
| AACAAAAATAAAAAATTTTGAATGTTGGGAGAATTTTATAGATTTGGATTCTAGATTTTAAACAAATATTTTGGTAAGTTTCTGGACCTAGATATCAATTTTCAGATGCGCTAGAGGGGTTTTGTGTTGA  |                                          |   |          |          |      |    |     |
| AATTTATTTTTCACAGGTATATACAGGCACAAAAA                                                                                                 |                                          |   |          |          |      |    |     |
| Cele.WB235                                                                                                                          | Cele.WB235_4:15294619                    | 4 | 15294619 | 15295382 | 764  | 4  | 14  |
| TTGTAGTTTG                                                                                                                          | TTGTAATTTGTAGT                           |   |          |          |      |    |     |
| Cele.WB235                                                                                                                          | Cele.WB235_4:15319979                    | 4 | 15319979 | 15320069 | 91   | 6  | 15  |
| TCGTGGTGAG                                                                                                                          | TCGTGGTGGGACCT                           |   |          |          |      |    |     |
| Cele.WB235                                                                                                                          | Cele.WB235_4:15320096                    | 4 | 15320096 | 15321040 | 945  | 27 | 35  |
| GAAATTCAAA                                                                                                                          | GAAATTCAAATTTTAAGTGAAAAAATTTTGGCGG       |   |          |          |      |    |     |
| Cele.WB235                                                                                                                          | Cele.WB235_4:15374013                    | 4 | 15374013 | 15374693 | 681  | 17 | 40  |
| GAACATTCCA                                                                                                                          | GAACATTCCAGAATTTTCTCGATTTTCTAGAAAGTTCTG  |   |          |          |      |    |     |
| Cele.WB235                                                                                                                          | Cele.WB235_4:15375074                    | 4 | 15375074 | 15376143 | 1070 | 51 | 15  |
| CCACGATGGG                                                                                                                          | CCACGATGGGTCTCA                          |   |          |          |      |    |     |
| Cele.WB235                                                                                                                          | Cele.WB235_4:15409425                    | 4 | 15409425 | 15409737 | 313  | 12 | 26  |
| CAGAGTCACT                                                                                                                          | CAGAGTCACTAAATTTGGTGAACGGC               |   |          |          |      |    |     |
| Cele.WB235                                                                                                                          | Cele.WB235_4:15410980                    | 4 | 15410980 | 15411070 | 91   | 8  | 10  |
| TGTTATGATA                                                                                                                          | GTTATGATAG                               |   |          |          |      |    |     |
| Cele.WB235                                                                                                                          | Cele.WB235_4:15511605                    | 4 | 15511605 | 15513283 | 1679 | 10 | 168 |
| GAATTCGGGA                                                                                                                          |                                          |   |          |          |      |    |     |
| GAATTCGGAAATGTTTTGATAGATTTGGATTCTGGTTTTTTTTTAAATATTATTGGAAAGTTTGTGGACCAGGAAAGTAAATTTAAGCCGCGCTAAAGAGGTTTTTGTGTCGAGTTCCAATTTTACAGGTA |                                          |   |          |          |      |    |     |
| CTAGTAGGCGCAAAAAACAAAAATAAAAAATTATG                                                                                                 |                                          |   |          |          |      |    |     |
| Cele.WB235                                                                                                                          | Cele.WB235_4:15517213                    | 4 | 15517213 | 15517493 | 281  | 8  | 35  |
| TTGCCGGATT                                                                                                                          | TTGCCGGATTTGAAAATTTATGGTAATTTGCCGTT      |   |          |          |      |    |     |
| Cele.WB235                                                                                                                          | Cele.WB235_4:15636148                    | 4 | 15636148 | 15636960 | 813  | 51 | 14  |
| GGACTAGGGA                                                                                                                          | GGACTAAGGACTAG                           |   |          |          |      |    |     |
| Cele.WB235                                                                                                                          | Cele.WB235_4:15648768                    | 4 | 15648768 | 15648845 | 78   | 6  | 11  |
| TGCACATTTT                                                                                                                          | TGCACATTTT                               |   |          |          |      |    |     |
| Cele.WB235                                                                                                                          | Cele.WB235_4:15708521                    | 4 | 15708521 | 15708971 | 451  | 14 | 32  |
| TTGAATTCCT                                                                                                                          | TTGAATTCCTCGCCAAAATTTTCAAAGAAAT          |   |          |          |      |    |     |
| Cele.WB235                                                                                                                          | Cele.WB235_4:15709349                    | 4 | 15709349 | 15709549 | 201  | 5  | 40  |
| ATTTTCCAGA                                                                                                                          | ATTTTCCAGAAGGTTCTGGAACATTCAGAATTTTCTCAA  |   |          |          |      |    |     |
| Cele.WB235                                                                                                                          | Cele.WB235_4:15765625                    | 4 | 15765625 | 15765904 | 280  | 6  | 40  |
| GATTTTCTA                                                                                                                           | GATTTTCTAGAAAGTTCTGGAACATTCAGAATTTTCTC   |   |          |          |      |    |     |

|            |                                                  |   |          |          |      |    |    |
|------------|--------------------------------------------------|---|----------|----------|------|----|----|
| Cele.WB235 | Cele.WB235_4:15765291                            | 4 | 15765291 | 15766235 | 945  | 8  | 35 |
| AAAATTTAA  | AAAATTTAAATTTCCCGCCAAAATATTTTCTCAG               |   |          |          |      |    |    |
| Cele.WB235 | Cele.WB235_4:15766277                            | 4 | 15766277 | 15766397 | 121  | 8  | 15 |
| GGGTCTCACC | GGGTCTCACCACGAT                                  |   |          |          |      |    |    |
| Cele.WB235 | Cele.WB235_4:15766300                            | 4 | 15766300 | 15766555 | 256  | 17 | 15 |
| CCACGATGGG | CCACGATGGGTCTCA                                  |   |          |          |      |    |    |
| Cele.WB235 | Cele.WB235_4:15766783                            | 4 | 15766783 | 15767403 | 621  | 19 | 11 |
| GTACTCCTAC | GTACTCCTACA                                      |   |          |          |      |    |    |
| Cele.WB235 | Cele.WB235_4:15776137                            | 4 | 15776137 | 15776526 | 390  | 5  | 42 |
| GCTCGGCAAA | GCTCGGCAAAATATTGAAAAAGAGATTGCGCAATTTGCCGT        |   |          |          |      |    |    |
| Cele.WB235 | Cele.WB235_4:15784879                            | 4 | 15784879 | 15785128 | 250  | 6  | 31 |
| TCGACAGAAG | TCGACAGAAGCTGTCGATCATCAGACTTTCC                  |   |          |          |      |    |    |
| Cele.WB235 | Cele.WB235_4:15826645                            | 4 | 15826645 | 15826960 | 316  | 21 | 15 |
| CCCATCGTGG | CCCATCGTGGCGAGA                                  |   |          |          |      |    |    |
| Cele.WB235 | Cele.WB235_4:15826993                            | 4 | 15826993 | 15827272 | 280  | 8  | 35 |
| AATTTAAATT | AATTTAAATTTCTGTGAAAAATATTTGGCGGGA                |   |          |          |      |    |    |
| Cele.WB235 | Cele.WB235_4:15826528                            | 4 | 15826528 | 15827586 | 1059 | 8  | 40 |
| GTTCCAGAAC | GTTCCAGAACCTTCTGGGAATTTCTGGAAAATTTCTAGAAT        |   |          |          |      |    |    |
| Cele.WB235 | Cele.WB235_4:15842446                            | 4 | 15842446 | 15843519 | 1074 | 16 | 37 |
| CGGGAATTCA | CGGGAATTCAAATTTTAAATTTTCTAAACATTTTGG             |   |          |          |      |    |    |
| Cele.WB235 | Cele.WB235_4:15859222                            | 4 | 15859222 | 15859379 | 158  | 8  | 20 |
| TGTTACACGA | TGTTACACGAAAAATAGAT                              |   |          |          |      |    |    |
| Cele.WB235 | Cele.WB235_4:15895865                            | 4 | 15895865 | 15896183 | 319  | 8  | 40 |
| GAACATTCCA | GAACATTCCAGACTTTTCCCAATTTTCTAGAAAGTTCTG          |   |          |          |      |    |    |
| Cele.WB235 | Cele.WB235_4:15971109                            | 4 | 15971109 | 15972271 | 1163 | 29 | 35 |
| TTCCCGCCAA | TTCCCGCCAAAAATTTTCTCAGTTAATTTGAAT                |   |          |          |      |    |    |
| Cele.WB235 | Cele.WB235_4:15971205                            | 4 | 15971205 | 15972491 | 1287 | 15 | 15 |
| CACGATGGGT | CACGATGGGTCTCGT                                  |   |          |          |      |    |    |
| Cele.WB235 | Cele.WB235_4:16094815                            | 4 | 16094815 | 16095563 | 749  | 18 | 11 |
| GTACTGTAGG | GTACTGTAGTA                                      |   |          |          |      |    |    |
| Cele.WB235 | Cele.WB235_4:16128108                            | 4 | 16128108 | 16129641 | 1534 | 16 | 15 |
| GGGTCTCACC | GGGTCTCACC CGCAA                                 |   |          |          |      |    |    |
| Cele.WB235 | Cele.WB235_4:16153344                            | 4 | 16153344 | 16153449 | 106  | 7  | 15 |
| GTGGTGAGAC | GTGGTGAGACCTTC                                   |   |          |          |      |    |    |
| Cele.WB235 | Cele.WB235_4:16223761                            | 4 | 16223761 | 16224157 | 397  | 25 | 15 |
| TCTCACCACG | TCACACCACGAAAGG                                  |   |          |          |      |    |    |
| Cele.WB235 | Cele.WB235_4:16244112                            | 4 | 16244112 | 16245385 | 1274 | 65 | 19 |
| AAATAGATTG | AAATAGATTGTTACACGGA                              |   |          |          |      |    |    |
| Cele.WB235 | Cele.WB235_4:16403739                            | 4 | 16403739 | 16404089 | 351  | 10 | 35 |
| CAAATCGGCA | CAAATCGGCAAATTGCCGAAATTGTAAAGTTCCGG              |   |          |          |      |    |    |
| Cele.WB235 | Cele.WB235_4:16408366                            | 4 | 16408366 | 16409098 | 733  | 21 | 35 |
| TTTGGCATAT | TTTGGCATATTGCTGATTTGCCGAAAATTTCAAC               |   |          |          |      |    |    |
| Cele.WB235 | Cele.WB235_4:16409693                            | 4 | 16409693 | 16409938 | 246  | 7  | 35 |
| GCAAATCGGC | GCAAATCGGC AAAATGTCCGAATTGAAATTTTCCG             |   |          |          |      |    |    |
| Cele.WB235 | Cele.WB235_4:16425000                            | 4 | 16425000 | 16425220 | 221  | 8  | 20 |
| TTTGTAGTAA | TTTGTAGTAAAAATTTGAGAT                            |   |          |          |      |    |    |
| Cele.WB235 | Cele.WB235_4:16427870                            | 4 | 16427870 | 16428521 | 652  | 13 | 50 |
| GGGCGTGT   | GGGCGTGTTTTACATGCCCCGCCACAAAATTGATGTTTCCACCAAAAT |   |          |          |      |    |    |
| Cele.WB235 | Cele.WB235_4:16458486                            | 4 | 16458486 | 16458684 | 199  | 5  | 40 |
| TTCCAGAATT | TTCCAGAATTTTCTCGATTTTCTAGAAAGTTCTGGAACG          |   |          |          |      |    |    |
| Cele.WB235 | Cele.WB235_4:16458853                            | 4 | 16458853 | 16459033 | 181  | 10 | 15 |
| TGGGTCTCAC | TGGGTCTCACCACGA                                  |   |          |          |      |    |    |

|                   |                                                                                                                                      |   |          |          |      |    |     |
|-------------------|--------------------------------------------------------------------------------------------------------------------------------------|---|----------|----------|------|----|-----|
| Cele.WB235        | Cele.WB235_4:16471145                                                                                                                | 4 | 16471145 | 16471947 | 803  | 4  | 37  |
| ATTCAAATTT        | ATTCAAATTTTAAATTTTGTGAAAATATTTTGACGGGA                                                                                               |   |          |          |      |    |     |
| Cele.WB235        | Cele.WB235_4:16491101                                                                                                                | 4 | 16491101 | 16491225 | 125  | 5  | 21  |
| TTCAAGCCTT        | TTCAAGCCTTTTCAGACCAAT                                                                                                                |   |          |          |      |    |     |
| Cele.WB235        | Cele.WB235_4:16511822                                                                                                                | 4 | 16511822 | 16512828 | 1007 | 39 | 11  |
| CTACAGTACT        | CTACAGTACCT                                                                                                                          |   |          |          |      |    |     |
| Cele.WB235        | Cele.WB235_4:16522968                                                                                                                | 4 | 16522968 | 16523369 | 402  | 28 | 11  |
| CCCCTACAGT        | CCCCTACAGTA                                                                                                                          |   |          |          |      |    |     |
| Cele.WB235        | Cele.WB235_4:16649049                                                                                                                | 4 | 16649049 | 16649496 | 448  | 15 | 30  |
| AAAATCAAAA        | AAAATCAAAAATTAGATGAATTTTCGATTA                                                                                                       |   |          |          |      |    |     |
| Cele.WB235        | Cele.WB235_4:16675606                                                                                                                | 4 | 16675606 | 16675766 | 161  | 4  | 40  |
| TTCAGAAATT        | TTCAGAAATTTTCCCGATTTTCTAGAAAGTTCTGGAACG                                                                                              |   |          |          |      |    |     |
| Cele.WB235        | Cele.WB235_4:16675832                                                                                                                | 4 | 16675832 | 16676039 | 208  | 6  | 35  |
| TTGAATTTCC        | TTGAATTTCCCGCCAAAATATTTTCTCAGAAAAAT                                                                                                  |   |          |          |      |    |     |
| Cele.WB235        | Cele.WB235_4:16681092                                                                                                                | 4 | 16681092 | 16681615 | 524  | 4  | 150 |
| TTGAGGGCCG        |                                                                                                                                      |   |          |          |      |    |     |
| TTGAGGGCCG        | TTGAGGGCCGAGTCCCAGATACACGAAGAAGTGTTGGAGATCCGTCAAGCCTATTCTAAGCATAATAATTCAGTTCGAGTGTGCAAGCCCAAATAGACGCAGAAGCGTTGGACAACCTTTTAGGCCTATTCT |   |          |          |      |    |     |
| GAGCCCAATAATTCATG |                                                                                                                                      |   |          |          |      |    |     |
| Cele.WB235        | Cele.WB235_4:16880641                                                                                                                | 4 | 16880641 | 16880761 | 121  | 8  | 15  |
| TCGTGGTGAG        | TCGTGGTGGGACCCT                                                                                                                      |   |          |          |      |    |     |
| Cele.WB235        | Cele.WB235_4:16910220                                                                                                                | 4 | 16910220 | 16910354 | 135  | 6  | 11  |
| AGTACTGTAG        | AGTACTGTAGG                                                                                                                          |   |          |          |      |    |     |
| Cele.WB235        | Cele.WB235_4:16910542                                                                                                                | 4 | 16910542 | 16910677 | 136  | 9  | 15  |
| TCGTGGTGAG        | TCGTGGTGAGACCCA                                                                                                                      |   |          |          |      |    |     |
| Cele.WB235        | Cele.WB235_4:16910719                                                                                                                | 4 | 16910719 | 16910928 | 210  | 6  | 35  |
| GAAATTTAAA        | GAAATTTAAATTTTCTGTGAAAAATATTTTGGCGG                                                                                                  |   |          |          |      |    |     |
| Cele.WB235        | Cele.WB235_4:16910953                                                                                                                | 4 | 16910953 | 16911111 | 159  | 4  | 40  |
| AAAAATCTGG        | AACATTCTGGAATGTTCCAGAACTTCTAGAAAAATCGAG                                                                                              |   |          |          |      |    |     |
| Cele.WB235        | Cele.WB235_4:16963408                                                                                                                | 4 | 16963408 | 16964890 | 1483 | 77 | 19  |
| AAAAATAGAT        | AAAAATAGATTGTTACACG                                                                                                                  |   |          |          |      |    |     |
| Cele.WB235        | Cele.WB235_4:17059789                                                                                                                | 4 | 17059789 | 17062957 | 3169 | 48 | 66  |
| CAATCAACC         | CAATCAACCTATTAGTTGACAAATGGTTTTCTTTATCAAATTTTTAAAAATTTTAAAGAAAAACA                                                                    |   |          |          |      |    |     |
| Cele.WB235        | Cele.WB235_4:17076321                                                                                                                | 4 | 17076321 | 17076588 | 268  | 10 | 11  |
| CCTACAGTAC        | CCTACAGTACT                                                                                                                          |   |          |          |      |    |     |
| Cele.WB235        | Cele.WB235_4:17128248                                                                                                                | 4 | 17128248 | 17129128 | 881  | 20 | 44  |
| GATTGATGGC        | GATTGATGGCCGAAAGGCTGTTTTCTGAGCATTGTTGTATTTCG                                                                                         |   |          |          |      |    |     |
| Cele.WB235        | Cele.WB235_4:17134995                                                                                                                | 4 | 17134995 | 17135342 | 348  | 5  | 18  |
| GCACTCCCTA        | GCACTCCCTATTAGTCTT                                                                                                                   |   |          |          |      |    |     |
| Cele.WB235        | Cele.WB235_4:17140454                                                                                                                | 4 | 17140454 | 17141354 | 901  | 60 | 15  |
| ACCCATCGTG        | ACCCATCGTGGTGAG                                                                                                                      |   |          |          |      |    |     |
| Cele.WB235        | Cele.WB235_4:17141438                                                                                                                | 4 | 17141438 | 17141648 | 211  | 6  | 35  |
| AAATTTTCTG        | AAATTTTCTGAGAAAAATATTTTGGCGGGAAATTT                                                                                                  |   |          |          |      |    |     |
| Cele.WB235        | Cele.WB235_4:17147999                                                                                                                | 4 | 17147999 | 17148449 | 451  | 28 | 15  |
| TCTCACCACG        | TCTCACCACGAAGTG                                                                                                                      |   |          |          |      |    |     |
| Cele.WB235        | Cele.WB235_4:17147932                                                                                                                | 4 | 17147932 | 17148762 | 831  | 9  | 37  |
| ATTCCCGCCA        | ATTCCCGCCAAAATATTTCCAAAAAATTAATAATTTTA                                                                                               |   |          |          |      |    |     |
| Cele.WB235        | Cele.WB235_4:17262649                                                                                                                | 4 | 17262649 | 17262776 | 128  | 4  | 32  |
| GAAGAAATTT        | GAAGAAATTTGAATTTGCACCAAAATTTTCT                                                                                                      |   |          |          |      |    |     |
| Cele.WB235        | Cele.WB235_4:17285019                                                                                                                | 4 | 17285019 | 17285079 | 61   | 4  | 15  |
| GTAGATCTTG        | GTAGATCTTGTTTTG                                                                                                                      |   |          |          |      |    |     |
| Cele.WB235        | Cele.WB235_4:17323162                                                                                                                | 4 | 17323162 | 17323330 | 169  | 7  | 24  |
| TCAACAACAA        | TCAACAACAACAGGAGAAGCTTCT                                                                                                             |   |          |          |      |    |     |

|                                                                                                                                     |                                     |   |          |          |      |    |     |
|-------------------------------------------------------------------------------------------------------------------------------------|-------------------------------------|---|----------|----------|------|----|-----|
| Cele.WB235                                                                                                                          | Cele.WB235_4:17345179               | 4 | 17345179 | 17345256 | 78   | 5  | 15  |
| TTCCCCCTTTT                                                                                                                         | TTCCCCCTTTTCGTAT                    |   |          |          |      |    |     |
| Cele.WB235                                                                                                                          | Cele.WB235_4:17492409               | 4 | 17492409 | 17493609 | 1201 | 48 | 25  |
| ACTCTCTGGC                                                                                                                          | ACTCTCTGGCTTCACCATATATTTT           |   |          |          |      |    |     |
| Cele.WB235                                                                                                                          | Cele.WB235_4:17493616               | 4 | 17493616 | 17493814 | 199  | 16 | 12  |
| GGCTTAGGCT                                                                                                                          | GGCTTAGGCTTA                        |   |          |          |      |    |     |
| Cele.WB235                                                                                                                          | Cele.WB235_5:6                      | 5 | 6        | 311      | 306  | 25 | 12  |
| TAAGCCTAAG                                                                                                                          | TAAGCCTAAGCC                        |   |          |          |      |    |     |
| Cele.WB235                                                                                                                          | Cele.WB235_5:100578                 | 5 | 100578   | 100668   | 91   | 6  | 15  |
| AAAAGGAGAA                                                                                                                          | AAAAGGAGAAATTTCG                    |   |          |          |      |    |     |
| Cele.WB235                                                                                                                          | Cele.WB235_5:100901                 | 5 | 100901   | 100991   | 91   | 6  | 15  |
| TTCTCCTTTT                                                                                                                          | TTCTCCTTTTTCGTCTG                   |   |          |          |      |    |     |
| Cele.WB235                                                                                                                          | Cele.WB235_5:317369                 | 5 | 317369   | 318431   | 1063 | 6  | 175 |
| AAATTTTGGG                                                                                                                          |                                     |   |          |          |      |    |     |
| AAATTTTGGGTTCACTCTTTTACTAGACAGTGATTGTTGCATTGTAGGATTCGGTGGACTTGTCCAACAACCTACTTTGGCATGAGTTTAATAAAAAGGTTTTACCATGAAGTGAATCAATTTAAATAAAA |                                     |   |          |          |      |    |     |
| ACCTCGAGAACGAAAACATCCTCAGTAATTTCAATCCTGTTC                                                                                          |                                     |   |          |          |      |    |     |
| Cele.WB235                                                                                                                          | Cele.WB235_5:335210                 | 5 | 335210   | 335330   | 121  | 7  | 16  |
| CATGCCTACA                                                                                                                          | CATGCCTACATGCCTA                    |   |          |          |      |    |     |
| Cele.WB235                                                                                                                          | Cele.WB235_5:342974                 | 5 | 342974   | 343198   | 225  | 14 | 16  |
| GGCATGTAGG                                                                                                                          | GGCATGTAGGCATGTA                    |   |          |          |      |    |     |
| Cele.WB235                                                                                                                          | Cele.WB235_5:365726                 | 5 | 365726   | 365780   | 55   | 4  | 12  |
| AGGCTTAGGC                                                                                                                          | AGGCTTAGGCTA                        |   |          |          |      |    |     |
| Cele.WB235                                                                                                                          | Cele.WB235_5:775516                 | 5 | 775516   | 775721   | 206  | 6  | 34  |
| CAATTTGCCG                                                                                                                          | CAATTTGCCGTTTGTCTCGGAAATTTTGAATCCGG |   |          |          |      |    |     |
| Cele.WB235                                                                                                                          | Cele.WB235_5:775870                 | 5 | 775870   | 776051   | 182  | 5  | 35  |
| TTTCCGGCAA                                                                                                                          | TTTCCGGCAAACCGGCGAATTGCCGGAATTGAAAA |   |          |          |      |    |     |
| Cele.WB235                                                                                                                          | Cele.WB235_5:777315                 | 5 | 777315   | 777395   | 81   | 5  | 16  |
| CTACATGCCT                                                                                                                          | CTACATGCCTACATGC                    |   |          |          |      |    |     |
| Cele.WB235                                                                                                                          | Cele.WB235_5:777834                 | 5 | 777834   | 778359   | 526  | 12 | 16  |
| AGGCATGTAG                                                                                                                          | AGGCATGTAGGCATGT                    |   |          |          |      |    |     |
| Cele.WB235                                                                                                                          | Cele.WB235_5:779287                 | 5 | 779287   | 779455   | 169  | 10 | 16  |
| AGGCATGTAG                                                                                                                          | AGGCATGTAGGCATGT                    |   |          |          |      |    |     |
| Cele.WB235                                                                                                                          | Cele.WB235_5:842648                 | 5 | 842648   | 842948   | 301  | 24 | 10  |
| GGCGTCAGCG                                                                                                                          | GGCGTCAGCG                          |   |          |          |      |    |     |
| Cele.WB235                                                                                                                          | Cele.WB235_5:885274                 | 5 | 885274   | 885474   | 201  | 12 | 16  |
| ATGCCTACAT                                                                                                                          | ATGCCTAGATGCCTAG                    |   |          |          |      |    |     |
| Cele.WB235                                                                                                                          | Cele.WB235_5:904306                 | 5 | 904306   | 904460   | 155  | 7  | 20  |
| CCTACCCAG                                                                                                                           | CCTACCCAGGCTGACCTAG                 |   |          |          |      |    |     |
| Cele.WB235                                                                                                                          | Cele.WB235_5:904415                 | 5 | 904415   | 904569   | 155  | 8  | 20  |
| GGCAGACCTA                                                                                                                          | GGCAGGCCTAACCTACCCCA                |   |          |          |      |    |     |
| Cele.WB235                                                                                                                          | Cele.WB235_5:967850                 | 5 | 967850   | 968138   | 289  | 7  | 35  |
| TGCCGATTTG                                                                                                                          | TGCCGATTTGCCGGAATGTTTATTTCGAGAATT   |   |          |          |      |    |     |
| Cele.WB235                                                                                                                          | Cele.WB235_5:1015554                | 5 | 1015554  | 1016070  | 517  | 9  | 35  |
| GCATTTGCCG                                                                                                                          | GCATTTGCCGTTTCGGAAATTTTCGGCAATTTTCG |   |          |          |      |    |     |
| Cele.WB235                                                                                                                          | Cele.WB235_5:1025021                | 5 | 1025021  | 1025505  | 485  | 20 | 22  |
| ACAGTACTCC                                                                                                                          | ACAGTACTCCTACAGTACCACT              |   |          |          |      |    |     |
| Cele.WB235                                                                                                                          | Cele.WB235_5:1027504                | 5 | 1027504  | 1027725  | 222  | 11 | 13  |
| GCCTATGGCC                                                                                                                          | GCCTATGGCAAAC                       |   |          |          |      |    |     |
| Cele.WB235                                                                                                                          | Cele.WB235_5:1028226                | 5 | 1028226  | 1028460  | 235  | 18 | 13  |
| CGTAGGCCAT                                                                                                                          | CGTAGGCCATATA                       |   |          |          |      |    |     |
| Cele.WB235                                                                                                                          | Cele.WB235_5:1047118                | 5 | 1047118  | 1047214  | 97   | 6  | 18  |
| AAGCCTAAGC                                                                                                                          | AAGCCTAAGTCTAAATCT                  |   |          |          |      |    |     |

|                                                                                                                                        |                                          |   |         |         |      |    |     |
|----------------------------------------------------------------------------------------------------------------------------------------|------------------------------------------|---|---------|---------|------|----|-----|
| Cele.WB235                                                                                                                             | Cele.WB235_5:1104557                     | 5 | 1104557 | 1105016 | 460  | 17 | 27  |
| TTACTCTCTG                                                                                                                             | TTACTCTCTGTGGCTTCACAGATTAAG              |   |         |         |      |    |     |
| Cele.WB235                                                                                                                             | Cele.WB235_5:1129473                     | 5 | 1129473 | 1129617 | 145  | 10 | 12  |
| GGCTTAGGCT                                                                                                                             | GGCTTCGGCTTA                             |   |         |         |      |    |     |
| Cele.WB235                                                                                                                             | Cele.WB235_5:1142352                     | 5 | 1142352 | 1142454 | 103  | 5  | 12  |
| CTAAGCCTAA                                                                                                                             | CTGAGCCTAAGC                             |   |         |         |      |    |     |
| Cele.WB235                                                                                                                             | Cele.WB235_5:1197262                     | 5 | 1197262 | 1197339 | 78   | 5  | 15  |
| CGAAAAGGGG                                                                                                                             | CGAAAAGGGGATCTG                          |   |         |         |      |    |     |
| Cele.WB235                                                                                                                             | Cele.WB235_5:1197514                     | 5 | 1197514 | 1197589 | 76   | 5  | 15  |
| TCCCCTTTTC                                                                                                                             | TCCCCTTTTCGTATC                          |   |         |         |      |    |     |
| Cele.WB235                                                                                                                             | Cele.WB235_5:1201995                     | 5 | 1201995 | 1204402 | 2408 | 13 | 185 |
| AATATAAACA                                                                                                                             |                                          |   |         |         |      |    |     |
| AATATAAACATACACGAATTTGTCTGATGTATAAAGATTCCCGAAGACACTTTCCAATTACCCAAATTGTTTCATATTCTAAATGAGATTCTCTTACTAGAACACTCTTGCCCAATGTACGCAGCCGAACGTAT |                                          |   |         |         |      |    |     |
| CATAAGTGAATACAGAACACCAGTTATGTCCGAGCAAAAAGATCCGATTTCAG                                                                                  |                                          |   |         |         |      |    |     |
| Cele.WB235                                                                                                                             | Cele.WB235_5:1227227                     | 5 | 1227227 | 1227275 | 49   | 4  | 12  |
| AAGCCTAAGC                                                                                                                             | AAGCCTAAGCTT                             |   |         |         |      |    |     |
| Cele.WB235                                                                                                                             | Cele.WB235_5:1230606                     | 5 | 1230606 | 1230858 | 253  | 19 | 12  |
| AAGCCTAAGC                                                                                                                             | AAGCCTAAGCCT                             |   |         |         |      |    |     |
| Cele.WB235                                                                                                                             | Cele.WB235_5:1236678                     | 5 | 1236678 | 1236956 | 279  | 15 | 12  |
| CTAAGCCTAA                                                                                                                             | CTAGGCCTAAAC                             |   |         |         |      |    |     |
| Cele.WB235                                                                                                                             | Cele.WB235_5:1239922                     | 5 | 1239922 | 1240281 | 360  | 10 | 35  |
| GAAATTTTCA                                                                                                                             | GAAATTTTCAATTCCGGCAAATTGCTTAATTGCCA      |   |         |         |      |    |     |
| Cele.WB235                                                                                                                             | Cele.WB235_5:1243605                     | 5 | 1243605 | 1243701 | 97   | 7  | 12  |
| CTTAGGCTTA                                                                                                                             | CTTAGGCTTAGG                             |   |         |         |      |    |     |
| Cele.WB235                                                                                                                             | Cele.WB235_5:1249610                     | 5 | 1249610 | 1249931 | 322  | 10 | 11  |
| TACCTACTAG                                                                                                                             | TACCTACTAGA                              |   |         |         |      |    |     |
| Cele.WB235                                                                                                                             | Cele.WB235_5:1254384                     | 5 | 1254384 | 1254459 | 76   | 5  | 15  |
| TCGTGGTGAG                                                                                                                             | TCGTGGTGAGACCCA                          |   |         |         |      |    |     |
| Cele.WB235                                                                                                                             | Cele.WB235_5:1254384                     | 5 | 1254384 | 1256245 | 1862 | 31 | 15  |
| TCGTGGTGAG                                                                                                                             | TCGTGGTGAGACCCA                          |   |         |         |      |    |     |
| Cele.WB235                                                                                                                             | Cele.WB235_5:1254387                     | 5 | 1254387 | 1257024 | 2638 | 44 | 15  |
| TGGTGAGACC                                                                                                                             | TGGTGAGACCCATCG                          |   |         |         |      |    |     |
| Cele.WB235                                                                                                                             | Cele.WB235_5:1254505                     | 5 | 1254505 | 1257773 | 3269 | 35 | 35  |
| GCGGGAAATT                                                                                                                             | GCGGGAAATTCAAATTTTCAGTGAAAAAATTTTG       |   |         |         |      |    |     |
| Cele.WB235                                                                                                                             | Cele.WB235_5:1273379                     | 5 | 1273379 | 1274003 | 625  | 14 | 35  |
| AATTCTGGCA                                                                                                                             | AATTCTGGCAAATTACCGATTGCGCGAAATTTTC       |   |         |         |      |    |     |
| Cele.WB235                                                                                                                             | Cele.WB235_5:1273379                     | 5 | 1273379 | 1274654 | 1276 | 15 | 35  |
| AATTCTGGCA                                                                                                                             | AATTCTGGCAAATTACCGATTGCGCGAAATTTTC       |   |         |         |      |    |     |
| Cele.WB235                                                                                                                             | Cele.WB235_5:1305908                     | 5 | 1305908 | 1306004 | 97   | 7  | 12  |
| AGGCTTAGGC                                                                                                                             | AGGCTTAGGCTC                             |   |         |         |      |    |     |
| Cele.WB235                                                                                                                             | Cele.WB235_5:1341430                     | 5 | 1341430 | 1341604 | 175  | 13 | 12  |
| CTAAGCCTAA                                                                                                                             | CTAAGCTTAAGC                             |   |         |         |      |    |     |
| Cele.WB235                                                                                                                             | Cele.WB235_5:1352314                     | 5 | 1352314 | 1352754 | 441  | 9  | 40  |
| AATGTTCTAG                                                                                                                             | AATGTTCTAGAACCTCCTGGAAATTTCGAGAAAAATCTGA |   |         |         |      |    |     |
| Cele.WB235                                                                                                                             | Cele.WB235_5:1355392                     | 5 | 1355392 | 1355652 | 261  | 6  | 40  |
| CTAGAACATT                                                                                                                             | CTAGAACTTTCCAGAATTTCTCAAACTTCTAGAAGGTT   |   |         |         |      |    |     |
| Cele.WB235                                                                                                                             | Cele.WB235_5:1368467                     | 5 | 1368467 | 1368669 | 203  | 6  | 34  |
| AAATTCAAAT                                                                                                                             | AAATTCAAATTTTCTGAGAAATAAATTTGACGGA       |   |         |         |      |    |     |
| Cele.WB235                                                                                                                             | Cele.WB235_5:1377073                     | 5 | 1377073 | 1377773 | 701  | 21 | 35  |
| ATTTTCAATT                                                                                                                             | ATTTTCAATTCCAGCAATTGCGGATTTTCTTGAA       |   |         |         |      |    |     |
| Cele.WB235                                                                                                                             | Cele.WB235_5:1385851                     | 5 | 1385851 | 1386349 | 499  | 9  | 35  |
| TTTGCCGGAA                                                                                                                             | TTTGCCGGAAAATTTCAATTCCGGCAAATGTGGA       |   |         |         |      |    |     |

|                                            |                                                                                                                                      |   |         |         |      |    |     |
|--------------------------------------------|--------------------------------------------------------------------------------------------------------------------------------------|---|---------|---------|------|----|-----|
| Cele.WB235                                 | Cele.WB235_5:1388994                                                                                                                 | 5 | 1388994 | 1389344 | 351  | 8  | 35  |
| TGCCGGAAT                                  | TGCCGGAATTTTGATTTTGGTAATTTGCCGATT                                                                                                    |   |         |         |      |    |     |
| Cele.WB235                                 | Cele.WB235_5:1403527                                                                                                                 | 5 | 1403527 | 1403806 | 280  | 7  | 40  |
| ATTTTCTAG                                  | ATTTTCTAGAAAGTTCTGGAACATTTCCAGACTTTTCCCA                                                                                             |   |         |         |      |    |     |
| Cele.WB235                                 | Cele.WB235_5:1403881                                                                                                                 | 5 | 1403881 | 1404196 | 316  | 21 | 15  |
| CGATGGGTCT                                 | CGATGGGTCTCACCA                                                                                                                      |   |         |         |      |    |     |
| Cele.WB235                                 | Cele.WB235_5:1404428                                                                                                                 | 5 | 1404428 | 1404696 | 269  | 8  | 11  |
| CTACAGTACC                                 | CTACAGTACTA                                                                                                                          |   |         |         |      |    |     |
| Cele.WB235                                 | Cele.WB235_5:1423375                                                                                                                 | 5 | 1423375 | 1423735 | 361  | 24 | 12  |
| CCTAAGCCTA                                 | CCTAAGCCTAAG                                                                                                                         |   |         |         |      |    |     |
| Cele.WB235                                 | Cele.WB235_5:1481682                                                                                                                 | 5 | 1481682 | 1481898 | 217  | 10 | 12  |
| AGCCTAAGCC                                 | AGCCTAAGCCTA                                                                                                                         |   |         |         |      |    |     |
| Cele.WB235                                 | Cele.WB235_5:1530916                                                                                                                 | 5 | 1530916 | 1531076 | 161  | 4  | 40  |
| GTTCTAGAAC                                 | GTTCTAGAACATTCCAGAAATTTTTCGAATTTTCCAGAAG                                                                                             |   |         |         |      |    |     |
| Cele.WB235                                 | Cele.WB235_5:1539714                                                                                                                 | 5 | 1539714 | 1540122 | 409  | 5  | 89  |
| GCACTACGTT                                 | GCACTACGTTGCGCACACACTAAGCTACTCGTTTCACGCCAGGCTGTGGAACCCCGAACGTGTGCGCCGCTCCAAATAACTATCGTTCA                                            |   |         |         |      |    |     |
| Cele.WB235                                 | Cele.WB235_5:1637931                                                                                                                 | 5 | 1637931 | 1639035 | 1105 | 23 | 48  |
| CCCGTAATTT                                 | CCCGTAATTTATAAATTTCTGAAGATAAGCAATTTAAATTTTGAGTTT                                                                                     |   |         |         |      |    |     |
| Cele.WB235                                 | Cele.WB235_5:1661122                                                                                                                 | 5 | 1661122 | 1661200 | 79   | 5  | 18  |
| GCCTAAGCCT                                 | GCCTAAGCCTAAGCATAC                                                                                                                   |   |         |         |      |    |     |
| Cele.WB235                                 | Cele.WB235_5:1718733                                                                                                                 | 5 | 1718733 | 1718863 | 131  | 9  | 13  |
| GCTCAAGCTA                                 | GCTCAAGCTAGGT                                                                                                                        |   |         |         |      |    |     |
| Cele.WB235                                 | Cele.WB235_5:1813009                                                                                                                 | 5 | 1813009 | 1813219 | 211  | 7  | 35  |
| TCCGGCAATT                                 | TCCGGCAATTTGTGCGATTTGCCGGAATTTTAAAA                                                                                                  |   |         |         |      |    |     |
| Cele.WB235                                 | Cele.WB235_5:1825303                                                                                                                 | 5 | 1825303 | 1825405 | 103  | 7  | 12  |
| AGCCTGAGCC                                 | AGCCTGAGCCTA                                                                                                                         |   |         |         |      |    |     |
| Cele.WB235                                 | Cele.WB235_5:1848647                                                                                                                 | 5 | 1848647 | 1848932 | 286  | 14 | 17  |
| TAAGCCTAAG                                 | TGAGCCTAAGCTTAGCT                                                                                                                    |   |         |         |      |    |     |
| Cele.WB235                                 | Cele.WB235_5:1850026                                                                                                                 | 5 | 1850026 | 1850346 | 321  | 23 | 10  |
| GGGCGTCAGC                                 | GGGCGTCAGC                                                                                                                           |   |         |         |      |    |     |
| Cele.WB235                                 | Cele.WB235_5:1907825                                                                                                                 | 5 | 1907825 | 1908395 | 571  | 7  | 93  |
| CAGTACCCTC                                 | CAGTACCCTCAAGGATCATCTGCTCCACGGTATCCTGGTAACTACAATGCCTTTGCCAGCACTTCCGATGCTCCACAGTATCCAGGATCCTCC                                        |   |         |         |      |    |     |
| Cele.WB235                                 | Cele.WB235_5:1911033                                                                                                                 | 5 | 1911033 | 1911178 | 146  | 7  | 11  |
| CTACAGTACT                                 | CTACAGTACTA                                                                                                                          |   |         |         |      |    |     |
| Cele.WB235                                 | Cele.WB235_5:1940104                                                                                                                 | 5 | 1940104 | 1940384 | 281  | 8  | 35  |
| GGCAAATCGG                                 | GGCAAATCGGCAATTTTCCGAAATGAAAATTTCT                                                                                                   |   |         |         |      |    |     |
| Cele.WB235                                 | Cele.WB235_5:2102635                                                                                                                 | 5 | 2102635 | 2102940 | 306  | 21 | 13  |
| GCCTAAGCCT                                 | GCTTAAGCCTCGG                                                                                                                        |   |         |         |      |    |     |
| Cele.WB235                                 | Cele.WB235_5:2141423                                                                                                                 | 5 | 2141423 | 2141937 | 515  | 18 | 11  |
| CTACAGTACC                                 | CTACAGTACTA                                                                                                                          |   |         |         |      |    |     |
| Cele.WB235                                 | Cele.WB235_5:2164618                                                                                                                 | 5 | 2164618 | 2164730 | 113  | 6  | 16  |
| ATGCCTACAT                                 | ATGCCTACATGCCTAC                                                                                                                     |   |         |         |      |    |     |
| Cele.WB235                                 | Cele.WB235_5:2389657                                                                                                                 | 5 | 2389657 | 2390366 | 710  | 4  | 177 |
| GAGTCTCACG                                 | GAGTCTCACGATGTGTCAACGTGTCTCAGTCGGCTTGATCTACGTAGATCTACAAAAATGCGGGAGAAGAGACGCAGACTTATTCTCTGATTTTGCATGAGTAAGAGCGTGCTGGCGTCACATTTTGTTCGG |   |         |         |      |    |     |
| CAAAAAATTCCCGCATTTTGTAGATCAAACCGTAATGGGACG |                                                                                                                                      |   |         |         |      |    |     |
| Cele.WB235                                 | Cele.WB235_5:2391673                                                                                                                 | 5 | 2391673 | 2391869 | 197  | 4  | 35  |
| AAATTTTCAA                                 | AAATTTTCAATTCCTCCAGTTTGCCAAATTTGCCCGG                                                                                                |   |         |         |      |    |     |
| Cele.WB235                                 | Cele.WB235_5:2394729                                                                                                                 | 5 | 2394729 | 2394777 | 49   | 4  | 12  |
| AGGCTTAGGC                                 | AGGCTTAAGCTC                                                                                                                         |   |         |         |      |    |     |
| Cele.WB235                                 | Cele.WB235_5:2497936                                                                                                                 | 5 | 2497936 | 2498645 | 710  | 4  | 177 |
| GAGTCTCACG                                 |                                                                                                                                      |   |         |         |      |    |     |



GAGTCTCACGATGTGTCAACGTGTCTCAGTCGGCTTGATCTACGTAGATCTACAAAAATGCGGGAGAAGAGACGCAGACTTATTCTCTGATTTTGCATGAGTAAGAGCGTGCTGGCGTCACATTTTTGTTCGG  
CAAAAAATTTCCCGCATTTTTTGTAGATCAAACCGTAATGGGACG

|             |                                                             |   |         |         |      |    |    |
|-------------|-------------------------------------------------------------|---|---------|---------|------|----|----|
| Cele.WB235  | Cele.WB235_5:2499952                                        | 5 | 2499952 | 2500148 | 197  | 4  | 35 |
| AAATTTTCAA  | AAATTTTCAATTCTCCAGTTTGCCAATTTGCCGG                          |   |         |         |      |    |    |
| Cele.WB235  | Cele.WB235_5:2503008                                        | 5 | 2503008 | 2503056 | 49   | 4  | 12 |
| AGGCTTAGGC  | AGGCTTAAGCTC                                                |   |         |         |      |    |    |
| Cele.WB235  | Cele.WB235_5:2586211                                        | 5 | 2586211 | 2586358 | 148  | 6  | 12 |
| CCTAAGCCTA  | CCTAGGCCTAAA                                                |   |         |         |      |    |    |
| Cele.WB235  | Cele.WB235_5:2634833                                        | 5 | 2634833 | 2635037 | 205  | 7  | 20 |
| CCCCGACGCT  | CCCCGACGCTCGAGCTCAA                                         |   |         |         |      |    |    |
| Cele.WB235  | Cele.WB235_5:2634964                                        | 5 | 2634964 | 2635164 | 201  | 10 | 20 |
| GCTCGAGCTC  | GCTCGAGCTCAAACCCCGAC                                        |   |         |         |      |    |    |
| Cele.WB235  | Cele.WB235_5:2636817                                        | 5 | 2636817 | 2636991 | 175  | 6  | 21 |
| GATTAGATTT  | GATTAGATTTTCGACCATATTG                                      |   |         |         |      |    |    |
| Cele.WB235  | Cele.WB235_5:2640455                                        | 5 | 2640455 | 2641508 | 1054 | 15 | 35 |
| TCAATTCGG   | TCAATTCGGCAATTTTCCGATTTGCCGGAAATTG                          |   |         |         |      |    |    |
| Cele.WB235  | Cele.WB235_5:2654959                                        | 5 | 2654959 | 2655536 | 578  | 16 | 35 |
| TTTGCCGGAA  | TTTGCCGGAAATTTTCAATTCGACAATTTGCCGG                          |   |         |         |      |    |    |
| Cele.WB235  | Cele.WB235_5:2660817                                        | 5 | 2660817 | 2661267 | 451  | 10 | 35 |
| TTTCCGGCAA  | TTTCCGGCAAATCGGAAAAGTGTCAGTTTAAAA                           |   |         |         |      |    |    |
| Cele.WB235  | Cele.WB235_5:2670563                                        | 5 | 2670563 | 2670782 | 220  | 6  | 35 |
| GCCGGAAATT  | GCCGGAAATTTTCAATTCGGCAACTCCCGATTT                           |   |         |         |      |    |    |
| Cele.WB235  | Cele.WB235_5:2676568                                        | 5 | 2676568 | 2676778 | 211  | 14 | 15 |
| CTCACCACGA  | CTCACCACGAAGGGT                                             |   |         |         |      |    |    |
| Cele.WB235  | Cele.WB235_5:2712581                                        | 5 | 2712581 | 2712737 | 157  | 13 | 12 |
| CTAAGCCTAA  | CTAAGCCTAAGC                                                |   |         |         |      |    |    |
| Cele.WB235  | Cele.WB235_5:2716232                                        | 5 | 2716232 | 2716355 | 124  | 4  | 35 |
| TTTCTCAGAA  | TTTCTCAGAAAATTGAAATTTCCCGCCAAATGTT                          |   |         |         |      |    |    |
| Cele.WB235  | Cele.WB235_5:2777566                                        | 5 | 2777566 | 2778653 | 1088 | 65 | 10 |
| TACCGCCCGC  | TACCGCCCGC                                                  |   |         |         |      |    |    |
| Cele.WB235  | Cele.WB235_5:2886582                                        | 5 | 2886582 | 2886789 | 208  | 19 | 11 |
| GCACATTTTT  | GCACATTTTTT                                                 |   |         |         |      |    |    |
| Cele.WB235  | Cele.WB235_5:3056063                                        | 5 | 3056063 | 3056653 | 591  | 10 | 59 |
| AAATTTCAAAT | AAATTTCAAATGTGCACTGGTTTTCAAAATTTTTTAACTGAGAATTATGGAAAATATGG |   |         |         |      |    |    |
| Cele.WB235  | Cele.WB235_5:3085214                                        | 5 | 3085214 | 3085707 | 494  | 4  | 16 |
| GCATGTAGGC  | GCATGTAGGCATGTAG                                            |   |         |         |      |    |    |
| Cele.WB235  | Cele.WB235_5:3092621                                        | 5 | 3092621 | 3092687 | 67   | 5  | 11 |
| TTTGGCAAGA  | TTTGGCAAGAA                                                 |   |         |         |      |    |    |
| Cele.WB235  | Cele.WB235_5:3098854                                        | 5 | 3098854 | 3099539 | 686  | 35 | 19 |
| AATCTATTTT  | AATCTATTTTTCGTAAGTC                                         |   |         |         |      |    |    |
| Cele.WB235  | Cele.WB235_5:3145392                                        | 5 | 3145392 | 3145472 | 81   | 6  | 10 |
| GCGGGCGGTA  | GCGGGCGGATA                                                 |   |         |         |      |    |    |
| Cele.WB235  | Cele.WB235_5:3332437                                        | 5 | 3332437 | 3332702 | 266  | 4  | 18 |
| TGCAAGACTA  | TGCAAGACTATTAGAGGC                                          |   |         |         |      |    |    |
| Cele.WB235  | Cele.WB235_5:3373171                                        | 5 | 3373171 | 3373906 | 736  | 20 | 21 |
| CTAACATTTT  | CTAACATTTTCAATTTTCGT                                        |   |         |         |      |    |    |
| Cele.WB235  | Cele.WB235_5:3520159                                        | 5 | 3520159 | 3520417 | 259  | 7  | 11 |
| TACTGTAGGA  | TACTGTAGAGG                                                 |   |         |         |      |    |    |
| Cele.WB235  | Cele.WB235_5:3520502                                        | 5 | 3520502 | 3520742 | 241  | 6  | 40 |
| TCCAGAACCT  | TCCAGAACCTTCTGGAAAATCCGAGAAAATCTGGAATGT                     |   |         |         |      |    |    |
| Cele.WB235  | Cele.WB235_5:3520923                                        | 5 | 3520923 | 3521917 | 995  | 31 | 32 |
| CGGGAATTCA  | CGGGAATTCAACATTTCTGTGAAAAATTTTG                             |   |         |         |      |    |    |

|                                                                      |                                                                                                                                       |   |         |         |      |     |     |
|----------------------------------------------------------------------|---------------------------------------------------------------------------------------------------------------------------------------|---|---------|---------|------|-----|-----|
| Cele.WB235                                                           | Cele.WB235_5:3621266                                                                                                                  | 5 | 3621266 | 3621341 | 76   | 5   | 15  |
| CGTGGTGAGA                                                           | CGTGGCGAGACCCAC                                                                                                                       |   |         |         |      |     |     |
| Cele.WB235                                                           | Cele.WB235_5:3629745                                                                                                                  | 5 | 3629745 | 3629789 | 45   | 4   | 11  |
| CAAAAAATGT                                                           | CAAAAAATGTG                                                                                                                           |   |         |         |      |     |     |
| Cele.WB235                                                           | Cele.WB235_5:3632093                                                                                                                  | 5 | 3632093 | 3632198 | 106  | 5   | 21  |
| TTTCAGTTTT                                                           | TTTCAGTTTTCGTCTATCATT                                                                                                                 |   |         |         |      |     |     |
| Cele.WB235                                                           | Cele.WB235_5:3651539                                                                                                                  | 5 | 3651539 | 3651616 | 78   | 4   | 21  |
| AGTTTGTAGT                                                           | AGTCTGTAGTTTGTCTGTTGT                                                                                                                 |   |         |         |      |     |     |
| Cele.WB235                                                           | Cele.WB235_5:3679665                                                                                                                  | 5 | 3679665 | 3679834 | 170  | 4   | 42  |
| TTTCCAGCAA                                                           | TTTCCAGCAAATTGGCAAATCGGCAAATTGTCGGAATTAAAA                                                                                            |   |         |         |      |     |     |
| Cele.WB235                                                           | Cele.WB235_5:3694442                                                                                                                  | 5 | 3694442 | 3694754 | 313  | 8   | 39  |
| GATTTACGGG                                                           | GATTTACGGGCATTGATCAGTTTCAAAAAATCTTGTGTC                                                                                               |   |         |         |      |     |     |
| Cele.WB235                                                           | Cele.WB235_5:3702753                                                                                                                  | 5 | 3702753 | 3703068 | 316  | 9   | 35  |
| AAAATTTCCG                                                           | AAAATTTCCGGCAAATTGACAAATTATGGAATTG                                                                                                    |   |         |         |      |     |     |
| Cele.WB235                                                           | Cele.WB235_5:3731028                                                                                                                  | 5 | 3731028 | 3731508 | 481  | 23  | 11  |
| AGGATTACTG                                                           | AGGATTACTGT                                                                                                                           |   |         |         |      |     |     |
| Cele.WB235                                                           | Cele.WB235_5:3763703                                                                                                                  | 5 | 3763703 | 3764133 | 431  | 4   | 35  |
| GCCGATTTGC                                                           | GCCGATTTGCCGAAATGTTCAATTCTGGCAAATT                                                                                                    |   |         |         |      |     |     |
| Cele.WB235                                                           | Cele.WB235_5:3765128                                                                                                                  | 5 | 3765128 | 3765284 | 157  | 4   | 35  |
| TTGCCGATTT                                                           | TTGCAGATTTGCCGAAAAATTCAATTCCGGCAAT                                                                                                    |   |         |         |      |     |     |
| Cele.WB235                                                           | Cele.WB235_5:3767901                                                                                                                  | 5 | 3767901 | 3768001 | 101  | 6   | 10  |
| TAGCCATGCC                                                           | TAGCCATGCC                                                                                                                            |   |         |         |      |     |     |
| Cele.WB235                                                           | Cele.WB235_5:3816982                                                                                                                  | 5 | 3816982 | 3817234 | 253  | 6   | 42  |
| ACCGGCAATT                                                           | ACCGGCAATTGCCAGAATTGCCGATCGCTGAAAAATTTCCAAA                                                                                           |   |         |         |      |     |     |
| Cele.WB235                                                           | Cele.WB235_5:4029541                                                                                                                  | 5 | 4029541 | 4030122 | 582  | 5   | 42  |
| CCAGCCGACA                                                           | CCAGCCGACAGCCGAAATTTTCAGATTTTCGGCTGGTAGCG                                                                                             |   |         |         |      |     |     |
| Cele.WB235                                                           | Cele.WB235_5:4050682                                                                                                                  | 5 | 4050682 | 4051242 | 561  | 14  | 40  |
| GAACCTTCTG                                                           | GAACCTTCTGAAAAATTCGAGAAAAATTTTGAATGTTTTT                                                                                              |   |         |         |      |     |     |
| Cele.WB235                                                           | Cele.WB235_5:4052517                                                                                                                  | 5 | 4052517 | 4053360 | 844  | 21  | 40  |
| CTAGAAAGTT                                                           | CTAGAAAGTTCTGGAATATTCAGAAATTTTATTGAACTTC                                                                                              |   |         |         |      |     |     |
| Cele.WB235                                                           | Cele.WB235_5:4053377                                                                                                                  | 5 | 4053377 | 4053861 | 485  | 15  | 32  |
| TTTCACAGAA                                                           | TTTCACAGAAAATTTGAATTCCCGCCAAAAATT                                                                                                     |   |         |         |      |     |     |
| Cele.WB235                                                           | Cele.WB235_5:4146424                                                                                                                  | 5 | 4146424 | 4146572 | 149  | 4   | 35  |
| TTTGCCGGAA                                                           | TTTGCCGGAAAATTTAATTTTGGCCAAATTGCCGT                                                                                                   |   |         |         |      |     |     |
| Cele.WB235                                                           | Cele.WB235_5:4190322                                                                                                                  | 5 | 4190322 | 4190733 | 412  | 11  | 35  |
| TTCCGGCAAA                                                           | TTCCGGCAAACCGGCAATTTCCGAAAACGAAAAA                                                                                                    |   |         |         |      |     |     |
| Cele.WB235                                                           | Cele.WB235_5:4193678                                                                                                                  | 5 | 4193678 | 4193984 | 307  | 5   | 35  |
| AATTTTCAAT                                                           | AATTTTAAATTCCTGCAATTTGCCAGTTTGCCAGA                                                                                                   |   |         |         |      |     |     |
| Cele.WB235                                                           | Cele.WB235_5:4197817                                                                                                                  | 5 | 4197817 | 4198139 | 323  | 8   | 35  |
| TTTCAATTCC                                                           | TTTCAATTCGGGAAGTTTGCCGATTTGCCGAAAT                                                                                                    |   |         |         |      |     |     |
| Cele.WB235                                                           | Cele.WB235_5:4244061                                                                                                                  | 5 | 4244061 | 4247526 | 3466 | 18  | 200 |
| TGTGGTCCAG                                                           | TGTGGTCCAGAAGGTATGACTGAAAAATTCACTTTTCTGCTTGAACCTGGCAGATTTAAAAATTTTCAAAATGCTGTTTTCAAATTCGAAAGAACTTAAAAATTTGCTACAAAATGGCTACGGGAATTTCTAA |   |         |         |      |     |     |
| AAAAGTTAGTTTCAAGCCAGAAATTAATTTTCAAAAATTTGAAAAATCTATTAATTTTGTATATAAAT |                                                                                                                                       |   |         |         |      |     |     |
| Cele.WB235                                                           | Cele.WB235_5:4268549                                                                                                                  | 5 | 4268549 | 4268631 | 83   | 4   | 18  |
| AAATATTCTT                                                           | AAATATTCTTATTTCAG                                                                                                                     |   |         |         |      |     |     |
| Cele.WB235                                                           | Cele.WB235_5:4333269                                                                                                                  | 5 | 4333269 | 4336644 | 3376 | 135 | 25  |
| AGAGTAAAT                                                            | AGAGTAAATATTCTGTGAAGCCAG                                                                                                              |   |         |         |      |     |     |
| Cele.WB235                                                           | Cele.WB235_5:4443918                                                                                                                  | 5 | 4443918 | 4444112 | 195  | 5   | 35  |
| ATTCCGGCAA                                                           | ATTCCGGCAAGTTGCCGGTTTGCCGGAAGTATTC                                                                                                    |   |         |         |      |     |     |
| Cele.WB235                                                           | Cele.WB235_5:4553148                                                                                                                  | 5 | 4553148 | 4553225 | 78   | 5   | 15  |
| CCCCTTTTCG                                                           | CCCCTTTTCGTTGCT                                                                                                                       |   |         |         |      |     |     |

|                                                                                                                                       |                                                                                               |   |         |         |       |     |     |
|---------------------------------------------------------------------------------------------------------------------------------------|-----------------------------------------------------------------------------------------------|---|---------|---------|-------|-----|-----|
| Cele.WB235                                                                                                                            | Cele.WB235_5:4653023                                                                          | 5 | 4653023 | 4653224 | 202   | 8   | 18  |
| CCTGGCTGTC                                                                                                                            | CCTGGCTGTCCATCGTTT                                                                            |   |         |         |       |     |     |
| Cele.WB235                                                                                                                            | Cele.WB235_5:4685532                                                                          | 5 | 4685532 | 4685994 | 463   | 10  | 35  |
| GCAAATCGGC                                                                                                                            | GCAAATCGGCAAATTGCCGATTTCGAAAATGTCCG                                                           |   |         |         |       |     |     |
| Cele.WB235                                                                                                                            | Cele.WB235_5:4718387                                                                          | 5 | 4718387 | 4718578 | 192   | 5   | 35  |
| CGGCAAATCG                                                                                                                            | CGGCAAATCGGCAACTTGCCGAATTTTAAATTTT                                                            |   |         |         |       |     |     |
| Cele.WB235                                                                                                                            | Cele.WB235_5:4773346                                                                          | 5 | 4773346 | 4773621 | 276   | 22  | 11  |
| CACGAAGTTG                                                                                                                            | CACAAAGTTGT                                                                                   |   |         |         |       |     |     |
| Cele.WB235                                                                                                                            | Cele.WB235_5:4784597                                                                          | 5 | 4784597 | 4784789 | 193   | 11  | 16  |
| TAGGCATGTA                                                                                                                            | TAGGCATGTAGGAAAG                                                                              |   |         |         |       |     |     |
| Cele.WB235                                                                                                                            | Cele.WB235_5:4866206                                                                          | 5 | 4866206 | 4866377 | 172   | 5   | 17  |
| AAATGCCAAA                                                                                                                            | AAATGCCAAAAGTCCA                                                                              |   |         |         |       |     |     |
| Cele.WB235                                                                                                                            | Cele.WB235_5:5004204                                                                          | 5 | 5004204 | 5005690 | 1487  | 35  | 11  |
| GTACTGTAGG                                                                                                                            | GTACTGTAGGA                                                                                   |   |         |         |       |     |     |
| Cele.WB235                                                                                                                            | Cele.WB235_5:5005844                                                                          | 5 | 5005844 | 5006744 | 901   | 59  | 15  |
| TCGTGGTGAG                                                                                                                            | TCGTGGTGAGACTCT                                                                               |   |         |         |       |     |     |
| Cele.WB235                                                                                                                            | Cele.WB235_5:5009264                                                                          | 5 | 5009264 | 5010522 | 1259  | 36  | 35  |
| AAATTTGAAT                                                                                                                            | AAATTTGAATTTCCCGCCAAAATTTTTTTCACTGA                                                           |   |         |         |       |     |     |
| Cele.WB235                                                                                                                            | Cele.WB235_5:5010548                                                                          | 5 | 5010548 | 5010653 | 106   | 7   | 15  |
| GGGTCTCACC                                                                                                                            | GGGTCTCACCACGAT                                                                               |   |         |         |       |     |     |
| Cele.WB235                                                                                                                            | Cele.WB235_5:5073280                                                                          | 5 | 5073280 | 5076759 | 3480  | 131 | 26  |
| AAAGTTAGAC                                                                                                                            | AAAGTTAGACCATTAGATGAATTTCC                                                                    |   |         |         |       |     |     |
| Cele.WB235                                                                                                                            | Cele.WB235_5:5117986                                                                          | 5 | 5117986 | 5118371 | 386   | 10  | 35  |
| TGCCGGAAAT                                                                                                                            | TGCCGGAAATTTTCGATTTTCGGCAAATGCCGATT                                                           |   |         |         |       |     |     |
| Cele.WB235                                                                                                                            | Cele.WB235_5:5125946                                                                          | 5 | 5125946 | 5126346 | 401   | 8   | 35  |
| TTGCCGATTT                                                                                                                            | TTGCCGATTTGCCGAACTTTCCAATTTTCGACAAG                                                           |   |         |         |       |     |     |
| Cele.WB235                                                                                                                            | Cele.WB235_5:5215493                                                                          | 5 | 5215493 | 5215916 | 424   | 9   | 35  |
| CGATTTGCCG                                                                                                                            | CGATTTGCCGAAAATTTTATTTTGGCAAATTC                                                              |   |         |         |       |     |     |
| Cele.WB235                                                                                                                            | Cele.WB235_5:5283302                                                                          | 5 | 5283302 | 5285834 | 2533  | 98  | 26  |
| CAGAGTCACT                                                                                                                            | CAGAGTCACTAATTTTGGTGAACGGT                                                                    |   |         |         |       |     |     |
| Cele.WB235                                                                                                                            | Cele.WB235_5:5415371                                                                          | 5 | 5415371 | 5416162 | 792   | 8   | 96  |
| TCTGCTTAGA                                                                                                                            | TCTGCTTAGAATAGGATTAAAGCCAGCCACAGTTTCAAGAGTATTCGGCCTGCGGCCCTCAAACCTGGTTATTAGGCTTGAGTGAATAACATA |   |         |         |       |     |     |
| Cele.WB235                                                                                                                            | Cele.WB235_5:5640056                                                                          | 5 | 5640056 | 5640116 | 61    | 4   | 15  |
| CGTGGTGAGA                                                                                                                            | CGTGGTGAGACCCTT                                                                               |   |         |         |       |     |     |
| Cele.WB235                                                                                                                            | Cele.WB235_5:5646992                                                                          | 5 | 5646992 | 5647147 | 156   | 8   | 19  |
| AAAAATAGAT                                                                                                                            | AAAAATAGATTGGCAGACG                                                                           |   |         |         |       |     |     |
| Cele.WB235                                                                                                                            | Cele.WB235_5:5754995                                                                          | 5 | 5754995 | 5755070 | 76    | 5   | 15  |
| CGAAAAGGGG                                                                                                                            | CAAAAAGGGGATCTG                                                                               |   |         |         |       |     |     |
| Cele.WB235                                                                                                                            | Cele.WB235_5:5755255                                                                          | 5 | 5755255 | 5755347 | 93    | 6   | 15  |
| TCCCCTTTTC                                                                                                                            | TCCCCTTTTTCGTATC                                                                              |   |         |         |       |     |     |
| Cele.WB235                                                                                                                            | Cele.WB235_5:6071658                                                                          | 5 | 6071658 | 6071958 | 301   | 20  | 15  |
| ACCCATCGTG                                                                                                                            | ACCCATCGTGGTGAG                                                                               |   |         |         |       |     |     |
| Cele.WB235                                                                                                                            | Cele.WB235_5:6071995                                                                          | 5 | 6071995 | 6072240 | 246   | 7   | 35  |
| ATTTTGCGCG                                                                                                                            | ATTTTGCGGGAAATTTAAATTTTCTGTGAAAAAT                                                            |   |         |         |       |     |     |
| Cele.WB235                                                                                                                            | Cele.WB235_5:6072277                                                                          | 5 | 6072277 | 6072797 | 521   | 13  | 40  |
| TTCCAGAACT                                                                                                                            | TTCCAGAACTTTCTAGAAAAATTGGGAAAAGTCTGGAATG                                                      |   |         |         |       |     |     |
| Cele.WB235                                                                                                                            | Cele.WB235_5:6088840                                                                          | 5 | 6088840 | 6089240 | 401   | 10  | 40  |
| TGGAATGTTT                                                                                                                            | TGGAATGTTCCAGAACTTTCTAGAAAAATTGGGAAAAGTC                                                      |   |         |         |       |     |     |
| Cele.WB235                                                                                                                            | Cele.WB235_5:6072983                                                                          | 5 | 6072983 | 6091328 | 18346 | 45  | 226 |
| CTTTGAAGAG                                                                                                                            |                                                                                               |   |         |         |       |     |     |
| CTTTGAAGAGATTTATGAATTTTCAAAGTTTGAAAAATCCACCTATTTTGCCTATTGATGGTAGTTTTCATTAAATAATAAAATACGCACTAAAAGGTAGGGCTGAAAATGTACTATTTCTGTAACCTACGTG |                                                                                               |   |         |         |       |     |     |
| AAGCTTCGTGTACCTACTGAAATATTGTTAATATATTCTGAAAGAGCTTAAATTTACTACAAAGTTTCTGAAAGACATTTCAAAAAAATTA                                           |                                                                                               |   |         |         |       |     |     |

|             |                                                                                                                         |   |         |         |      |     |     |
|-------------|-------------------------------------------------------------------------------------------------------------------------|---|---------|---------|------|-----|-----|
| Cele.WB235  | Cele.WB235_5:6091617                                                                                                    | 5 | 6091617 | 6091992 | 376  | 25  | 15  |
| CCCATCGTGG  | CCCATCGTGGTGAGA                                                                                                         |   |         |         |      |     |     |
| Cele.WB235  | Cele.WB235_5:6171700                                                                                                    | 5 | 6171700 | 6176164 | 4465 | 182 | 24  |
| TTTCAGTTTA  | TTTGAGTTTATCATCCTTATCTTT                                                                                                |   |         |         |      |     |     |
| Cele.WB235  | Cele.WB235_5:6176242                                                                                                    | 5 | 6176242 | 6183220 | 6979 | 54  | 117 |
| TGTTGGTTTCG | TGTTGGTTTCGACAGTAGGTGCATTAGCCTCTGGAACGGAACATCCTTTTCTGCTCGACGATTGCAGCTTGTTGTACTTCAGATGTTTCCTTTGATTCCACAGGTGCAAGTTTCTCAAC |   |         |         |      |     |     |
| Cele.WB235  | Cele.WB235_5:6188375                                                                                                    | 5 | 6188375 | 6189068 | 694  | 15  | 42  |
| AGGTGCTGCT  | AGGTGCTGCTTCCTTCGGAACATTTTCTTGAGTTGGCTCCGA                                                                              |   |         |         |      |     |     |
| Cele.WB235  | Cele.WB235_5:6219658                                                                                                    | 5 | 6219658 | 6220602 | 945  | 16  | 59  |
| ATGTGCACTG  | ATGTGCACTGGTTTTTCAAAAATTTTAACTGAGAATAATGGAGAATAGGGAATTTCAA                                                              |   |         |         |      |     |     |
| Cele.WB235  | Cele.WB235_5:6296625                                                                                                    | 5 | 6296625 | 6296906 | 282  | 8   | 35  |
| AATTTCCCGC  | AATTTCCCGCCAAAATTTTTCAGAGAAAATTTG                                                                                       |   |         |         |      |     |     |
| Cele.WB235  | Cele.WB235_5:6297848                                                                                                    | 5 | 6297848 | 6298284 | 437  | 5   | 35  |
| TTTCCCGCCA  | TTTCCCGCCAAAATTTGTTTTTCACTGAAAATTTGAA                                                                                   |   |         |         |      |     |     |
| Cele.WB235  | Cele.WB235_5:6299893                                                                                                    | 5 | 6299893 | 6299998 | 106  | 7   | 15  |
| GGGTCTCACC  | GGGTCTCACCACGAT                                                                                                         |   |         |         |      |     |     |
| Cele.WB235  | Cele.WB235_5:6392866                                                                                                    | 5 | 6392866 | 6392950 | 85   | 4   | 21  |
| TTGGTGACAA  | TTGGTGACAATGTGGAAACAA                                                                                                   |   |         |         |      |     |     |
| Cele.WB235  | Cele.WB235_5:6587809                                                                                                    | 5 | 6587809 | 6587899 | 91   | 6   | 15  |
| GGTGAGACCC  | GGTGAGACCCCTTCGT                                                                                                        |   |         |         |      |     |     |
| Cele.WB235  | Cele.WB235_5:6910515                                                                                                    | 5 | 6910515 | 6910653 | 139  | 7   | 17  |
| CTCATTCGCT  | CTCATTCGACTACCCCTG                                                                                                      |   |         |         |      |     |     |
| Cele.WB235  | Cele.WB235_5:6937435                                                                                                    | 5 | 6937435 | 6937626 | 192  | 10  | 19  |
| AACAATCTAT  | AACAATCTATTTTTCGTGT                                                                                                     |   |         |         |      |     |     |
| Cele.WB235  | Cele.WB235_5:6942140                                                                                                    | 5 | 6942140 | 6942965 | 826  | 14  | 59  |
| AATTCAAGAC  | AATTCAAGACTTCACTGGTTTTTCAAAAACCTTAAACCGAGAATTATGGGGAATATGGA                                                             |   |         |         |      |     |     |
| Cele.WB235  | Cele.WB235_5:6944029                                                                                                    | 5 | 6944029 | 6944530 | 502  | 36  | 12  |
| TTTAATTTTA  | TTTAATTTTAAT                                                                                                            |   |         |         |      |     |     |
| Cele.WB235  | Cele.WB235_5:6984815                                                                                                    | 5 | 6984815 | 6985177 | 363  | 11  | 32  |
| AATTCAAATT  | AATTCAAATTTTGTGAAAATATTTGGCGGG                                                                                          |   |         |         |      |     |     |
| Cele.WB235  | Cele.WB235_5:7115024                                                                                                    | 5 | 7115024 | 7115184 | 161  | 4   | 40  |
| TTCTAGAACC  | TTCTAGAACCCTCTGGAAAGTTCAAGAGAATTCTGGAATG                                                                                |   |         |         |      |     |     |
| Cele.WB235  | Cele.WB235_5:7259575                                                                                                    | 5 | 7259575 | 7259935 | 361  | 6   | 60  |
| CTAGCTAGAT  | CTAGCTAGATTGAACGCTCTCAAGAGAAAGCATCTTGTTGCTGCCCACAAGAAGAAGGCT                                                            |   |         |         |      |     |     |
| Cele.WB235  | Cele.WB235_5:7337779                                                                                                    | 5 | 7337779 | 7337924 | 146  | 8   | 18  |
| TTTCATAAGA  | TTTCATAAGAAGTAAATC                                                                                                      |   |         |         |      |     |     |
| Cele.WB235  | Cele.WB235_5:7442929                                                                                                    | 5 | 7442929 | 7443089 | 161  | 4   | 40  |
| GAAGGTTCTA  | GAAGGTTCTAGAATATTCAGAAATATTCAAAACCTTTCCA                                                                                |   |         |         |      |     |     |
| Cele.WB235  | Cele.WB235_5:7443218                                                                                                    | 5 | 7443218 | 7444716 | 1499 | 50  | 11  |
| CTACAGTACC  | CTACAGTACCT                                                                                                             |   |         |         |      |     |     |
| Cele.WB235  | Cele.WB235_5:7703008                                                                                                    | 5 | 7703008 | 7703129 | 122  | 6   | 17  |
| CTCATTCGCT  | CTCATTCGCTACCCCTTG                                                                                                      |   |         |         |      |     |     |
| Cele.WB235  | Cele.WB235_5:7720637                                                                                                    | 5 | 7720637 | 7720787 | 151  | 10  | 15  |
| GGGTCTCACC  | GGGTCTCACCACGAA                                                                                                         |   |         |         |      |     |     |
| Cele.WB235  | Cele.WB235_5:7912986                                                                                                    | 5 | 7912986 | 7913626 | 641  | 16  | 40  |
| TCTGGAACAT  | TCTGGAACATTCCAGAATTTCCTCGATTTTCTAGAAAGT                                                                                 |   |         |         |      |     |     |
| Cele.WB235  | Cele.WB235_5:7913711                                                                                                    | 5 | 7913711 | 7913991 | 281  | 8   | 35  |
| CAGAAAATTT  | CAGAAAATTTAAATTTCCCGCAAAAATATTTTCA                                                                                      |   |         |         |      |     |     |
| Cele.WB235  | Cele.WB235_5:7914059                                                                                                    | 5 | 7914059 | 7914224 | 166  | 11  | 15  |
| CCACGATGGG  | CCACGATGGGTCTCA                                                                                                         |   |         |         |      |     |     |
| Cele.WB235  | Cele.WB235_5:7915927                                                                                                    | 5 | 7915927 | 7916107 | 181  | 11  | 15  |
| ACCCATCGTG  | ACCCATCGTGCGAG                                                                                                          |   |         |         |      |     |     |

|                                                                                                                                      |                                                                                                                   |   |          |          |      |     |     |
|--------------------------------------------------------------------------------------------------------------------------------------|-------------------------------------------------------------------------------------------------------------------|---|----------|----------|------|-----|-----|
| Cele.WB235                                                                                                                           | Cele.WB235_5:7916137                                                                                              | 5 | 7916137  | 7916840  | 704  | 20  | 35  |
| GGGAAATTTA                                                                                                                           | GGGAAATTTAAATTTTCTGTGAAAAATATTTTGGC                                                                               |   |          |          |      |     |     |
| Cele.WB235                                                                                                                           | Cele.WB235_5:7916966                                                                                              | 5 | 7916966  | 7925007  | 8042 | 201 | 40  |
| TTCTAGAAAA                                                                                                                           | TTCTAGAAAAATTGGGAAAAGTCTGGAATGTTCCAGAACT                                                                          |   |          |          |      |     |     |
| Cele.WB235                                                                                                                           | Cele.WB235_5:7988900                                                                                              | 5 | 7988900  | 7991510  | 2611 | 90  | 29  |
| CATAGTGGGA                                                                                                                           | CATAGTGGGAAATCCTTACAATGTATCGA                                                                                     |   |          |          |      |     |     |
| Cele.WB235                                                                                                                           | Cele.WB235_5:7993172                                                                                              | 5 | 7993172  | 7993472  | 301  | 12  | 25  |
| CCAGAGAGTA                                                                                                                           | CCAGAGAGTAAATTATACTGTGAAG                                                                                         |   |          |          |      |     |     |
| Cele.WB235                                                                                                                           | Cele.WB235_5:8314150                                                                                              | 5 | 8314150  | 8315036  | 887  | 51  | 17  |
| TAGTCAATGA                                                                                                                           | TAGTCAATGATCTGAGG                                                                                                 |   |          |          |      |     |     |
| Cele.WB235                                                                                                                           | Cele.WB235_5:8316057                                                                                              | 5 | 8316057  | 8316570  | 514  | 17  | 15  |
| GGGTCTCACC                                                                                                                           | GGGTCTCACCGCGAA                                                                                                   |   |          |          |      |     |     |
| Cele.WB235                                                                                                                           | Cele.WB235_5:8699367                                                                                              | 5 | 8699367  | 8702913  | 3547 | 59  | 60  |
| ATTCAGTTGA                                                                                                                           | ATTCAGTTGAGCTCGTTATGTCTGGTTGAAGACACAATTGGAGTGGTGTCTGAGGAGCTGG                                                     |   |          |          |      |     |     |
| Cele.WB235                                                                                                                           | Cele.WB235_5:8705331                                                                                              | 5 | 8705331  | 8709788  | 4458 | 38  | 114 |
| GTGTTTCAGA                                                                                                                           | GTGTTTCAGAAATTACATGGAGTCTCACTACTGCAGAATTTGTGGCTGTAGACGATTGACCTGCTGTAGTTGAATCGCTTGAACTGTCATAGTGGATGTTCCATCAGACGTTT |   |          |          |      |     |     |
| Cele.WB235                                                                                                                           | Cele.WB235_5:8714029                                                                                              | 5 | 8714029  | 8714965  | 937  | 12  | 78  |
| TGCAAGGCTC                                                                                                                           | TGCAAGGCTCCGATGATGATAACCACTTCCAAAGTCGAGGTGTTACAATTTTGGATGTAATAGAACTTGAATCAGTGA                                    |   |          |          |      |     |     |
| Cele.WB235                                                                                                                           | Cele.WB235_5:8836966                                                                                              | 5 | 8836966  | 8837173  | 208  | 8   | 26  |
| TTCGCCCTGA                                                                                                                           | TTCGCCCTGAGCGATTACCTCCCGT                                                                                         |   |          |          |      |     |     |
| Cele.WB235                                                                                                                           | Cele.WB235_5:8879060                                                                                              | 5 | 8879060  | 8879267  | 208  | 8   | 26  |
| TTCGCCCTGA                                                                                                                           | TTCGCCCTGAGCGATTACCTCCCGT                                                                                         |   |          |          |      |     |     |
| Cele.WB235                                                                                                                           | Cele.WB235_5:9428459                                                                                              | 5 | 9428459  | 9435308  | 6850 | 32  | 214 |
| GTAAGTCTC                                                                                                                            |                                                                                                                   |   |          |          |      |     |     |
| GTAAGTCTCAAAGCTTCTGGCACCTATTGGGATGTTGTTGGTAAATTTCTGAAAAAACTTGAATTTGCAACAAAGTTTCTGAAAGAATTTTCGAAAAAAGTTGATTTGAAGTGATTTGGGAATTTTCAAAGT |                                                                                                                   |   |          |          |      |     |     |
| TTTCATAAATTTACCTATTTTGCCTATAAATGGTCGTTTTCATTTAATAATAAAAATACGCACAAAGGTACTGTAGGTTTTCT                                                  |                                                                                                                   |   |          |          |      |     |     |
| Cele.WB235                                                                                                                           | Cele.WB235_5:9439011                                                                                              | 5 | 9439011  | 9439221  | 211  | 6   | 35  |
| AGAAAATTTA                                                                                                                           | AGAAAATTTAAATTTCCCTCCAAAATTTTCTCTC                                                                                |   |          |          |      |     |     |
| Cele.WB235                                                                                                                           | Cele.WB235_5:9439276                                                                                              | 5 | 9439276  | 9439441  | 166  | 11  | 15  |
| CGATGGGTCT                                                                                                                           | CGATGGGTCTCACCA                                                                                                   |   |          |          |      |     |     |
| Cele.WB235                                                                                                                           | Cele.WB235_5:9439666                                                                                              | 5 | 9439666  | 9439923  | 258  | 8   | 11  |
| GTACTCCTAC                                                                                                                           | GTACTCCTACA                                                                                                       |   |          |          |      |     |     |
| Cele.WB235                                                                                                                           | Cele.WB235_5:9601934                                                                                              | 5 | 9601934  | 9602249  | 316  | 21  | 15  |
| GGTGAGACCC                                                                                                                           | GGTGAGACCTTCGT                                                                                                    |   |          |          |      |     |     |
| Cele.WB235                                                                                                                           | Cele.WB235_5:9602338                                                                                              | 5 | 9602338  | 9603453  | 1116 | 32  | 35  |
| GCGGGAAATT                                                                                                                           | GCGGGAAATTCAAATTTTCAGTGAAAAAATTTTG                                                                                |   |          |          |      |     |     |
| Cele.WB235                                                                                                                           | Cele.WB235_5:9603508                                                                                              | 5 | 9603508  | 9604068  | 561  | 15  | 40  |
| TTTCTAGAAA                                                                                                                           | TTTCTAGAAAATTCGGGAAAACCTCTGGAATATTCAGAAC                                                                          |   |          |          |      |     |     |
| Cele.WB235                                                                                                                           | Cele.WB235_5:9933015                                                                                              | 5 | 9933015  | 9933120  | 106  | 5   | 21  |
| TTCTAATTCG                                                                                                                           | TTCTAATTCGACGAGCATCCC                                                                                             |   |          |          |      |     |     |
| Cele.WB235                                                                                                                           | Cele.WB235_5:10268112                                                                                             | 5 | 10268112 | 10269248 | 1137 | 33  | 34  |
| TTGGCGGGAA                                                                                                                           | TTGGCGGGAAATTCAAATTTTCAGTGAAAAAATTT                                                                               |   |          |          |      |     |     |
| Cele.WB235                                                                                                                           | Cele.WB235_5:10446631                                                                                             | 5 | 10446631 | 10446995 | 365  | 14  | 26  |
| CCAGAGTCAC                                                                                                                           | CCAGAGTCACTATAATTGGTGAACGG                                                                                        |   |          |          |      |     |     |
| Cele.WB235                                                                                                                           | Cele.WB235_5:10449424                                                                                             | 5 | 10449424 | 10450674 | 1251 | 50  | 25  |
| TTTACTCTCT                                                                                                                           | TTTACTCTCTGGCTTCACAGTATAT                                                                                         |   |          |          |      |     |     |
| Cele.WB235                                                                                                                           | Cele.WB235_5:10450709                                                                                             | 5 | 10450709 | 10450922 | 214  | 19  | 11  |
| AGATACACTT                                                                                                                           | AGATACACTTG                                                                                                       |   |          |          |      |     |     |
| Cele.WB235                                                                                                                           | Cele.WB235_5:10605694                                                                                             | 5 | 10605694 | 10612481 | 6788 | 174 | 39  |
| GGCCACCAGA                                                                                                                           | GGCCACCAGAAATACCAGTTTATGAAAAAGTGGCTCTAG                                                                           |   |          |          |      |     |     |
| Cele.WB235                                                                                                                           | Cele.WB235_5:11057749                                                                                             | 5 | 11057749 | 11057963 | 215  | 10  | 11  |
| CACATTTTTT                                                                                                                           | CACATTTTTTG                                                                                                       |   |          |          |      |     |     |

|                     |                                                                                                                                     |   |          |          |      |     |     |
|---------------------|-------------------------------------------------------------------------------------------------------------------------------------|---|----------|----------|------|-----|-----|
| Cele.WB235          | Cele.WB235_5:11108155                                                                                                               | 5 | 11108155 | 11108378 | 224  | 5   | 45  |
| TCTGATCCTT          | TCTGATCCTTCAGCTCCGAAGGATCACATGGGTACCTTCTGATGT                                                                                       |   |          |          |      |     |     |
| Cele.WB235          | Cele.WB235_5:11108491                                                                                                               | 5 | 11108491 | 11108983 | 493  | 11  | 45  |
| CTGAAGGATC          | CTGAAGGATCAGACCATCAGGAGGTACCTTACGATCCTTCTTAT                                                                                        |   |          |          |      |     |     |
| Cele.WB235          | Cele.WB235_5:11273771                                                                                                               | 5 | 11273771 | 11274491 | 721  | 16  | 45  |
| ACAACTGAAT          | ACAACTGAATCAACTGCAGCACCAAGCACATCTACAGAGACACCT                                                                                       |   |          |          |      |     |     |
| Cele.WB235          | Cele.WB235_5:12077837                                                                                                               | 5 | 12077837 | 12077917 | 81   | 5   | 16  |
| AAAAATTATT          | AAAAATTATTGAATAC                                                                                                                    |   |          |          |      |     |     |
| Cele.WB235          | Cele.WB235_5:12370870                                                                                                               | 5 | 12370870 | 12371218 | 349  | 5   | 18  |
| GCACTCCCTA          | GCACTCCCTATTAGTCTT                                                                                                                  |   |          |          |      |     |     |
| Cele.WB235          | Cele.WB235_5:12510458                                                                                                               | 5 | 12510458 | 12510577 | 120  | 8   | 14  |
| CTATACGCTA          | CTATACGCTATACG                                                                                                                      |   |          |          |      |     |     |
| Cele.WB235          | Cele.WB235_5:12633007                                                                                                               | 5 | 12633007 | 12633394 | 388  | 10  | 39  |
| TGGTACGGTA          | TGGTACGGTAGTTGTAGTGGTAGTGGAGGTTGTTGTAGG                                                                                             |   |          |          |      |     |     |
| Cele.WB235          | Cele.WB235_5:13365913                                                                                                               | 5 | 13365913 | 13366445 | 533  | 28  | 19  |
| GTTACACGAA          | GTTACACGAAAAATAGATT                                                                                                                 |   |          |          |      |     |     |
| Cele.WB235          | Cele.WB235_5:13440191                                                                                                               | 5 | 13440191 | 13440658 | 468  | 12  | 40  |
| TCTGGAATGT          | TCTGGAATGTTCCAGAACTTTCTAAAAAATCGGGAAAAAT                                                                                            |   |          |          |      |     |     |
| Cele.WB235          | Cele.WB235_5:13640261                                                                                                               | 5 | 13640261 | 13645859 | 5599 | 335 | 16  |
| GAAAAATTTT          | GAAAAATTTTGCTGTT                                                                                                                    |   |          |          |      |     |     |
| Cele.WB235          | Cele.WB235_5:13640261                                                                                                               | 5 | 13640261 | 13646660 | 6400 | 357 | 16  |
| GAAAAATTTT          | GAAAAATTTTGCTGTT                                                                                                                    |   |          |          |      |     |     |
| Cele.WB235          | Cele.WB235_5:13882296                                                                                                               | 5 | 13882296 | 13882386 | 91   | 6   | 15  |
| TCGTGGTGAG          | TCGTGGTGAGACCTT                                                                                                                     |   |          |          |      |     |     |
| Cele.WB235          | Cele.WB235_5:13882409                                                                                                               | 5 | 13882409 | 13882690 | 282  | 8   | 35  |
| GCGGGAAATT          | GCGGGAAATTCAAATTTTCAGTGAAAAAATTTTA                                                                                                  |   |          |          |      |     |     |
| Cele.WB235          | Cele.WB235_5:13882781                                                                                                               | 5 | 13882781 | 13883141 | 361  | 10  | 40  |
| TTTCTAGAAA          | TTTCTAGAAAATTCGAGAAAATTCGGAATGGTCCAGAAT                                                                                             |   |          |          |      |     |     |
| Cele.WB235          | Cele.WB235_5:13956630                                                                                                               | 5 | 13956630 | 13956708 | 79   | 6   | 12  |
| TCTTTCTCCT          | TCTTTCTCCTTT                                                                                                                        |   |          |          |      |     |     |
| Cele.WB235          | Cele.WB235_5:14053790                                                                                                               | 5 | 14053790 | 14054393 | 604  | 4   | 151 |
| CATTTTCAGAT         | CATTTTCAGATATTCCATCACCAACACCTTCATCCACTTCTTCGCCTGGAACGACGGGATTTTCTACAAAAATCGGATTTTTTCTCTATGTCAGTTTAATTGATGTATAATTCCGAAAAGTCAGTCTTTCC |   |          |          |      |     |     |
| TAGGTTTTTTAAATTGAAA |                                                                                                                                     |   |          |          |      |     |     |
| Cele.WB235          | Cele.WB235_5:14057570                                                                                                               | 5 | 14057570 | 14057714 | 145  | 6   | 11  |
| CTACAGTACC          | CTACAGTACCC                                                                                                                         |   |          |          |      |     |     |
| Cele.WB235          | Cele.WB235_5:14104614                                                                                                               | 5 | 14104614 | 14106168 | 1555 | 20  | 57  |
| GAACTCAACA          | GAACTCAACAAGCTGATCAAGAGCAACACCGTGGATCCCGATCTGCCGGACAGAAGG                                                                           |   |          |          |      |     |     |
| Cele.WB235          | Cele.WB235_5:14107921                                                                                                               | 5 | 14107921 | 14109961 | 2041 | 34  | 60  |
| CTGCTGATT           | CTGCTGATTCCGAGAAGAAGGCCCAAGAGAGAATCTGATAAGCCAAAGACTGAAT                                                                             |   |          |          |      |     |     |
| Cele.WB235          | Cele.WB235_5:14124319                                                                                                               | 5 | 14124319 | 14124409 | 91   | 6   | 15  |
| CGTGGTGAGA          | CGTGTTGAGACCCTA                                                                                                                     |   |          |          |      |     |     |
| Cele.WB235          | Cele.WB235_5:14124469                                                                                                               | 5 | 14124469 | 14125286 | 818  | 21  | 35  |
| GGAAATTCAA          | GGAAATTCAAATTTTAAGTGAAAAAATTTTGCGG                                                                                                  |   |          |          |      |     |     |
| Cele.WB235          | Cele.WB235_5:14156207                                                                                                               | 5 | 14156207 | 14156297 | 91   | 6   | 15  |
| GGGTCTCACC          | GGGTCTCACCACGAA                                                                                                                     |   |          |          |      |     |     |
| Cele.WB235          | Cele.WB235_5:14204941                                                                                                               | 5 | 14204941 | 14205737 | 797  | 14  | 64  |
| GTAGTCAAAA          | GTAGTCAAAAAGACAAAAGTGCGAATGTAGCTATTTTTTCAGTCAGTAGCGAAAAAGACATTCA                                                                    |   |          |          |      |     |     |
| Cele.WB235          | Cele.WB235_5:14320937                                                                                                               | 5 | 14320937 | 14321192 | 256  | 5   | 24  |
| GCCGCTCCAG          | GCCGCTCCAGCACCAGCACCAGAA                                                                                                            |   |          |          |      |     |     |
| Cele.WB235          | Cele.WB235_5:14348178                                                                                                               | 5 | 14348178 | 14348446 | 269  | 6   | 45  |
| TCTGATCCTT          | TCTGATCCTTCAGATAAGAAGGATCGTAAGGGTACCTCCTGATGG                                                                                       |   |          |          |      |     |     |

|                                                                                                                                       |                                                                         |   |          |          |      |    |     |
|---------------------------------------------------------------------------------------------------------------------------------------|-------------------------------------------------------------------------|---|----------|----------|------|----|-----|
| Cele.WB235                                                                                                                            | Cele.WB235_5:14348461                                                   | 5 | 14348461 | 14348640 | 180  | 4  | 45  |
| CTGAAGGATC                                                                                                                            | CTGAAGGATCAGACCATCAGGAGGTACCCTTACGATCCTTCTTAT                           |   |          |          |      |    |     |
| Cele.WB235                                                                                                                            | Cele.WB235_5:14444028                                                   | 5 | 14444028 | 14444120 | 93   | 6  | 15  |
| TCCCCTTTTC                                                                                                                            | TCCCCTTTTCGTATC                                                         |   |          |          |      |    |     |
| Cele.WB235                                                                                                                            | Cele.WB235_5:14586076                                                   | 5 | 14586076 | 14591096 | 5021 | 31 | 162 |
| TTC CGTACAA                                                                                                                           |                                                                         |   |          |          |      |    |     |
| TTCCGTACAAGCTATCATACTTTGTTTTGGCATTTTCTGGTATATTTGGTCGTGCTGAACAATTTTTTGAATAAAACAGAATCGCTTCATATGATTTTCCCATACTTTTGAATTTTGGAAAATAATAGCTTCT |                                                                         |   |          |          |      |    |     |
| GGTTAATTTCTGAATTTTTAAAAATTAAC                                                                                                         |                                                                         |   |          |          |      |    |     |
| Cele.WB235                                                                                                                            | Cele.WB235_5:14750559                                                   | 5 | 14750559 | 14751884 | 1326 | 53 | 25  |
| TGTGAAGCCA                                                                                                                            | TGTGAAGCCAGAGGGTAAATTATTC                                               |   |          |          |      |    |     |
| Cele.WB235                                                                                                                            | Cele.WB235_5:14754513                                                   | 5 | 14754513 | 14757536 | 3024 | 84 | 27  |
| CTGTGGCTTC                                                                                                                            | CTGTGGCTTCCAACCATATTTTACTCT                                             |   |          |          |      |    |     |
| Cele.WB235                                                                                                                            | Cele.WB235_5:14766633                                                   | 5 | 14766633 | 14767947 | 1315 | 28 | 49  |
| GCTACGATAT                                                                                                                            | GCTACGATATCGTAGCACTTTTTTATTTTCCATATTCACCAGAAAAAT                        |   |          |          |      |    |     |
| Cele.WB235                                                                                                                            | Cele.WB235_5:14768011                                                   | 5 | 14768011 | 14769734 | 1724 | 59 | 27  |
| GGAAGCCACA                                                                                                                            | GGAAGCCACAGAGAGTAAATATGGTG                                              |   |          |          |      |    |     |
| Cele.WB235                                                                                                                            | Cele.WB235_5:15009961                                                   | 5 | 15009961 | 15010009 | 49   | 4  | 12  |
| TCTAAGTCTA                                                                                                                            | TCTAAGTCTAAA                                                            |   |          |          |      |    |     |
| Cele.WB235                                                                                                                            | Cele.WB235_5:15168733                                                   | 5 | 15168733 | 15168927 | 195  | 6  | 35  |
| GGAATTGAAA                                                                                                                            | GGAATTGAAAATTTCCGGCAAATTGGCAAATTGGC                                     |   |          |          |      |    |     |
| Cele.WB235                                                                                                                            | Cele.WB235_5:15170122                                                   | 5 | 15170122 | 15170278 | 157  | 6  | 26  |
| TTCACCTAAA                                                                                                                            | TTCACCTAAAAATGACTCTAACCA                                                |   |          |          |      |    |     |
| Cele.WB235                                                                                                                            | Cele.WB235_5:15295547                                                   | 5 | 15295547 | 15296333 | 787  | 8  | 15  |
| TCTCACCACG                                                                                                                            | TCTCACCACGATGGG                                                         |   |          |          |      |    |     |
| Cele.WB235                                                                                                                            | Cele.WB235_5:15320778                                                   | 5 | 15320778 | 15321338 | 561  | 14 | 40  |
| CGATTTTTCT                                                                                                                            | CGATTTTTCTAGAAAATTCCTGGAACACTCCAGAATTTTCC                               |   |          |          |      |    |     |
| Cele.WB235                                                                                                                            | Cele.WB235_5:15321484                                                   | 5 | 15321484 | 15322280 | 797  | 53 | 15  |
| CCACGATGGG                                                                                                                            | CCACGATGGGTCTCA                                                         |   |          |          |      |    |     |
| Cele.WB235                                                                                                                            | Cele.WB235_5:15322538                                                   | 5 | 15322538 | 15322672 | 135  | 5  | 11  |
| GTACTCCTAC                                                                                                                            | GTACTCCTACA                                                             |   |          |          |      |    |     |
| Cele.WB235                                                                                                                            | Cele.WB235_5:15525755                                                   | 5 | 15525755 | 15526135 | 381  | 5  | 73  |
| TTAGGCTTAA                                                                                                                            | TTAGGCTTAAGTGTCATAAGGATTTCCAATATTTTCTTCCAGTTGGGCATCCTAGTATGTTTTTCGGGCCT |   |          |          |      |    |     |
| Cele.WB235                                                                                                                            | Cele.WB235_5:15582778                                                   | 5 | 15582778 | 15582853 | 76   | 5  | 15  |
| AGACCCATCG                                                                                                                            | AGACCCATCGTAGTG                                                         |   |          |          |      |    |     |
| Cele.WB235                                                                                                                            | Cele.WB235_5:15582889                                                   | 5 | 15582889 | 15584265 | 1377 | 36 | 35  |
| TTCAAATTTT                                                                                                                            | TTCAAATTTTCTGTGAGAAAAATTTTGGGGGGAAA                                     |   |          |          |      |    |     |
| Cele.WB235                                                                                                                            | Cele.WB235_5:15615355                                                   | 5 | 15615355 | 15615426 | 72   | 5  | 12  |
| CTTAGGCTTA                                                                                                                            | CTTAGACTTAGG                                                            |   |          |          |      |    |     |
| Cele.WB235                                                                                                                            | Cele.WB235_5:15770931                                                   | 5 | 15770931 | 15771023 | 93   | 6  | 15  |
| CGAAAAGGGG                                                                                                                            | CGAAAAGGGGATCTG                                                         |   |          |          |      |    |     |
| Cele.WB235                                                                                                                            | Cele.WB235_5:15823540                                                   | 5 | 15823540 | 15823605 | 66   | 4  | 11  |
| GTACTGTAGG                                                                                                                            | GTACTGTAGGG                                                             |   |          |          |      |    |     |
| Cele.WB235                                                                                                                            | Cele.WB235_5:15941558                                                   | 5 | 15941558 | 15942466 | 909  | 7  | 37  |
| GCGGGAATTC                                                                                                                            | GCGGGAATTCAAATTTTAATTATTTGAAATCATTTTG                                   |   |          |          |      |    |     |
| Cele.WB235                                                                                                                            | Cele.WB235_5:16191704                                                   | 5 | 16191704 | 16191915 | 212  | 6  | 42  |
| TTTCGGCAAC                                                                                                                            | TTTCGGCAACCGCAATTGCCGATGTTGCCGAACCCGAAAAA                               |   |          |          |      |    |     |
| Cele.WB235                                                                                                                            | Cele.WB235_5:16273671                                                   | 5 | 16273671 | 16273852 | 182  | 5  | 36  |
| GGGAATTCAA                                                                                                                            | GGGAATTCAAATTTCAATTTTGGAAACATTTTGGC                                     |   |          |          |      |    |     |
| Cele.WB235                                                                                                                            | Cele.WB235_5:16273937                                                   | 5 | 16273937 | 16274402 | 466  | 31 | 15  |
| TGGTGAGACC                                                                                                                            | TGGTGAGACCTTTTCG                                                        |   |          |          |      |    |     |
| Cele.WB235                                                                                                                            | Cele.WB235_5:16330598                                                   | 5 | 16330598 | 16333224 | 2627 | 16 | 164 |
| AAAAAATCAG                                                                                                                            |                                                                         |   |          |          |      |    |     |

AAAAAATCAGCTTTTATATATTTTCATCAATTTTAAAAAAATACTTCCGTACAAGCTATTATACTTTGATTGGCATATTTTGGTGTTTTGGACTATGCTGAACATTTTATGAAATAAAAAAGAATGACTCC  
ATATGATTTTCTAGGACTTTTGAATTTTGA  
Cele.WB235 Cele.WB235\_5:16449792 5 16449792 16451728 1937 16 121  
AAAAGATAGT  
AAAAGATAGTTGCTCTTTGAGCAGAAGGTTGCAAACCGCAAGAGCAAACCTTGCCAAATGACAAGCCACCCAAGTACTCGTTGCACCTACCTATCATAAGCTCGTAGACTATAATTTCTCTG  
Cele.WB235 Cele.WB235\_5:16530645 5 16530645 16530908 264 16 12  
CATTGACTTG CATTGACTTGGG  
Cele.WB235 Cele.WB235\_5:16536032 5 16536032 16536834 803 14 22  
GGGTACTGTA GGGTACTGTAGTAGTACTGTAT  
Cele.WB235 Cele.WB235\_5:16547005 5 16547005 16547587 583 10 11  
GTACTGTAGG GTACTGTAGGG  
Cele.WB235 Cele.WB235\_5:16547704 5 16547704 16548504 801 18 40  
CTGGAATGTT CTGGAATGTTCCAAAACCTTCTGGAAAATTTGAGAAAATG  
Cele.WB235 Cele.WB235\_5:16547704 5 16547704 16548822 1119 19 40  
CTGGAATGTT CTGGAATGTTCCAAAACCTTCTGGAAAATTTGAGAAAATG  
Cele.WB235 Cele.WB235\_5:16552748 5 16552748 16552808 61 4 15  
CGAAAAGGGG CAAAAGGGGATCTG  
Cele.WB235 Cele.WB235\_5:16553018 5 16553018 16553153 136 7 15  
GCAGATCCCC GCAGATCCCCTTTT  
Cele.WB235 Cele.WB235\_5:16583907 5 16583907 16584035 129 4 32  
GCTGATTGGT GCTGATTGGTGAGATACTGAGCATTCTGAAA  
Cele.WB235 Cele.WB235\_5:16625438 5 16625438 16625585 148 7 21  
ATTTTCAAT ATTTTCAATCTTCGTCTAAA  
Cele.WB235 Cele.WB235\_5:16672548 5 16672548 16672735 188 11 17  
TAACCTGACT TAACCTGACTGCAACAG  
Cele.WB235 Cele.WB235\_5:16699106 5 16699106 16699538 433 26 16  
ACATACCTAC ACATACCTACATACCT  
Cele.WB235 Cele.WB235\_5:16878345 5 16878345 16878591 247 7 11  
CTACAGTACC CTACAGTACCT  
Cele.WB235 Cele.WB235\_5:16941584 5 16941584 16941761 178 5 21  
CTAATTAGCG CTAAGTAGCGTCGCTTCCTTT  
Cele.WB235 Cele.WB235\_5:16945467 5 16945467 16945572 106 5 21  
TGCTAATTAG TGCTAATTAGCGCGGCTGCGT  
Cele.WB235 Cele.WB235\_5:17043954 5 17043954 17044434 481 12 40  
AAAATTCTGG AAAATTCTGGAATGTTCTAGAGCCTTTTGAAAAATTTGAA  
Cele.WB235 Cele.WB235\_5:17086843 5 17086843 17087795 953 8 119  
AACTGTGGGC  
AACTGTGGGCTGGCTTTAATCCTAACCCAAGCAGAGCAGGATGTAGGCCTGAAACGTGGTTGTTATTCAATCAAGCCTAACCAACCAGGTTTGAGGGCCGCAGGCCCGAAAACTCTTGGA  
Cele.WB235 Cele.WB235\_5:17308169 5 17308169 17308466 298 8 37  
AAAACATTTT AAAACATTTTGGCGGGAATTCAAAATTTAATTTTGT  
Cele.WB235 Cele.WB235\_5:17364710 5 17364710 17364818 109 9 12  
CGCAACGCGA CGCAACGCGATA  
Cele.WB235 Cele.WB235\_5:17384240 5 17384240 17394505 10266 169 59  
ATGGTGAATA ATGGTGAATATGGAATTCAGACTTCACTGGTTTTCAAAATTTTAAAAACCGAAAATT  
Cele.WB235 Cele.WB235\_5:17412072 5 17412072 17412375 304 16 19  
TTTTCGTGTA TTTTCGTGTAACAATCTAT  
Cele.WB235 Cele.WB235\_5:17495404 5 17495404 17495538 135 5 11  
CCTACAGTAC CCTACAGTACT  
Cele.WB235 Cele.WB235\_5:17522891 5 17522891 17524718 1828 7 255  
ACAAGTCGG  
ACAAGTCGGGAACGTTTCGGAAGCTCTGAGGAAAACCTCCGACAGTATTATGCTTAAGTACGCAATTGAGCTATCTTTATTAGATTTCGAAAGAGGACGCTTCAAAAATTGAAGCAATAACGAAGAAGCTTAAG  
TTGGAACCTGGCGAAGCTTAAATTGAGAATTACGCAGTCTTTATCAGATTCAAAAGACGACTCTTTGTCCAATGAAGCAAATCTGCAGAACGATCTACCTTCGACTTCTGATAGCAAACTCC



|                                                                                                                                       |                                                                                 |   |          |          |      |    |     |
|---------------------------------------------------------------------------------------------------------------------------------------|---------------------------------------------------------------------------------|---|----------|----------|------|----|-----|
| Cele.WB235                                                                                                                            | Cele.WB235_5:17587204                                                           | 5 | 17587204 | 17587343 | 140  | 10 | 12  |
| ACGCGACACG                                                                                                                            | ACGCGACACGCA                                                                    |   |          |          |      |    |     |
| Cele.WB235                                                                                                                            | Cele.WB235_5:17619161                                                           | 5 | 17619161 | 17619418 | 258  | 8  | 11  |
| CCTACAGTAC                                                                                                                            | CCTACAGTACT                                                                     |   |          |          |      |    |     |
| Cele.WB235                                                                                                                            | Cele.WB235_5:17629258                                                           | 5 | 17629258 | 17629682 | 425  | 26 | 16  |
| CCAGGGTTCC                                                                                                                            | CCAGGGTTCCAGGGTT                                                                |   |          |          |      |    |     |
| Cele.WB235                                                                                                                            | Cele.WB235_5:17629258                                                           | 5 | 17629258 | 17630037 | 780  | 29 | 16  |
| CCAGGGTTCC                                                                                                                            | CCAGGGTTCCAGGGTT                                                                |   |          |          |      |    |     |
| Cele.WB235                                                                                                                            | Cele.WB235_5:17653226                                                           | 5 | 17653226 | 17653322 | 97   | 6  | 16  |
| GAATAATATT                                                                                                                            | GAATAATATTGGAGAA                                                                |   |          |          |      |    |     |
| Cele.WB235                                                                                                                            | Cele.WB235_5:17747299                                                           | 5 | 17747299 | 17748649 | 1351 | 6  | 143 |
| CAGTGGGATT                                                                                                                            |                                                                                 |   |          |          |      |    |     |
| CAGTGGGATTCTGAATTTATTCCAATCAAACGTCCGGGGTTCGAGTCCGCACAGGGGTATTTATTTTTCGCAAGCTGTGATTTACAAGTTTATAGCTGCAAAAGTGATTTTATCGAATTTTATAGGAAAATGT |                                                                                 |   |          |          |      |    |     |
| CCGAATGGCA                                                                                                                            |                                                                                 |   |          |          |      |    |     |
| Cele.WB235                                                                                                                            | Cele.WB235_5:17780829                                                           | 5 | 17780829 | 17781140 | 312  | 5  | 20  |
| ATTTGACCTA                                                                                                                            | ATTTGACCTATTTTTTAA                                                              |   |          |          |      |    |     |
| Cele.WB235                                                                                                                            | Cele.WB235_5:17817728                                                           | 5 | 17817728 | 17818258 | 531  | 13 | 34  |
| TCAAATTTTC                                                                                                                            | TCAGATTTTCTGAAAAAACTTTATCGGGAAAT                                                |   |          |          |      |    |     |
| Cele.WB235                                                                                                                            | Cele.WB235_5:17880208                                                           | 5 | 17880208 | 17882252 | 2045 | 55 | 35  |
| TCCGGCAAAT                                                                                                                            | TCCGGCAAATCAAAAATTGCGCGAAATGAAAATT                                              |   |          |          |      |    |     |
| Cele.WB235                                                                                                                            | Cele.WB235_5:17885285                                                           | 5 | 17885285 | 17887191 | 1907 | 37 | 44  |
| TTGCCGGAAA                                                                                                                            | TTGCCGGAAATAGTAATTTTGGCAAATTGCGGGTTTGCTGAAT                                     |   |          |          |      |    |     |
| Cele.WB235                                                                                                                            | Cele.WB235_5:17991128                                                           | 5 | 17991128 | 17991485 | 358  | 5  | 35  |
| AATTCCGGCA                                                                                                                            | ACTTCCGGCAAGTTGCCGATTGCGCGAAATCTTC                                              |   |          |          |      |    |     |
| Cele.WB235                                                                                                                            | Cele.WB235_5:18042826                                                           | 5 | 18042826 | 18043263 | 438  | 10 | 35  |
| TTTCCGGCAA                                                                                                                            | TTTCCGGCAAATCGGCGATTGCGCTGAATTGAAAG                                             |   |          |          |      |    |     |
| Cele.WB235                                                                                                                            | Cele.WB235_5:18110272                                                           | 5 | 18110272 | 18110517 | 246  | 7  | 35  |
| AAATTTTCGG                                                                                                                            | AAATTTTCGGCAAATTCGATAATTGCGGGTTTTGT                                             |   |          |          |      |    |     |
| Cele.WB235                                                                                                                            | Cele.WB235_5:18169395                                                           | 5 | 18169395 | 18171299 | 1905 | 61 | 31  |
| GTCAATTTTT                                                                                                                            | GTCAATTTTTGGCGGGAAATCAAATTTTCA                                                  |   |          |          |      |    |     |
| Cele.WB235                                                                                                                            | Cele.WB235_5:18173031                                                           | 5 | 18173031 | 18173742 | 712  | 10 | 78  |
| GAGCTTTGGG                                                                                                                            | GAGCTTTGGGGCTTTTGGCTTGATCTCAGTCGACTTGATGGATTCTGGCTTGGGTCTGCGAGGCTTTTCGGGGCTCCTT |   |          |          |      |    |     |
| Cele.WB235                                                                                                                            | Cele.WB235_5:18201732                                                           | 5 | 18201732 | 18201816 | 85   | 4  | 21  |
| GCACTGACCA                                                                                                                            | GCACTGACCAATGCAATGTT                                                            |   |          |          |      |    |     |
| Cele.WB235                                                                                                                            | Cele.WB235_5:18314435                                                           | 5 | 18314435 | 18314705 | 271  | 6  | 45  |
| TTTGGAGCTG                                                                                                                            | TTTGGAGCTGAAGATTCAAGTCATAAGGGGGACCCCTTATGATCC                                   |   |          |          |      |    |     |
| Cele.WB235                                                                                                                            | Cele.WB235_5:18354225                                                           | 5 | 18354225 | 18354524 | 300  | 14 | 14  |
| ACAAACTACA                                                                                                                            | ACAAACTACAACT                                                                   |   |          |          |      |    |     |
| Cele.WB235                                                                                                                            | Cele.WB235_5:18388249                                                           | 5 | 18388249 | 18388686 | 438  | 22 | 19  |
| CAAGGCACCTA                                                                                                                           | CAAGGCACCTAGAAATGCGT                                                            |   |          |          |      |    |     |
| Cele.WB235                                                                                                                            | Cele.WB235_5:18389794                                                           | 5 | 18389794 | 18390302 | 509  | 18 | 19  |
| TGACGCAATT                                                                                                                            | TGACGCAATTCACGTGCCT                                                             |   |          |          |      |    |     |
| Cele.WB235                                                                                                                            | Cele.WB235_5:18400360                                                           | 5 | 18400360 | 18401785 | 1426 | 72 | 20  |
| AAAAATAGAT                                                                                                                            | AAAAATAGATTGATACACGA                                                            |   |          |          |      |    |     |
| Cele.WB235                                                                                                                            | Cele.WB235_5:18410594                                                           | 5 | 18410594 | 18410720 | 127  | 9  | 14  |
| GTCTGGGGTC                                                                                                                            | GTCTGGGGTCTGGG                                                                  |   |          |          |      |    |     |
| Cele.WB235                                                                                                                            | Cele.WB235_5:18415750                                                           | 5 | 18415750 | 18416287 | 538  | 16 | 31  |
| TTGGCCCAGA                                                                                                                            | TTGGCCCAGAGCTCTCTTGACCTAAGCCCCC                                                 |   |          |          |      |    |     |
| Cele.WB235                                                                                                                            | Cele.WB235_5:18447331                                                           | 5 | 18447331 | 18447583 | 253  | 9  | 28  |
| CCAAGAGAAT                                                                                                                            | CCAAGAGAATTCAACCGCCTAGAAATT                                                     |   |          |          |      |    |     |
| Cele.WB235                                                                                                                            | Cele.WB235_5:18473949                                                           | 5 | 18473949 | 18474108 | 160  | 4  | 32  |
| GAATTCAAAT                                                                                                                            | GAATTCAAATTTTCTGAAAAATTTTGGCGT                                                  |   |          |          |      |    |     |

|             |                                         |   |          |          |      |    |    |
|-------------|-----------------------------------------|---|----------|----------|------|----|----|
| Cele.WB235  | Cele.WB235_5:18475570                   | 5 | 18475570 | 18475679 | 110  | 6  | 12 |
| GTATATGTAT  | GTATATGTATAT                            |   |          |          |      |    |    |
| Cele.WB235  | Cele.WB235_5:18536998                   | 5 | 18536998 | 18537693 | 696  | 5  | 31 |
| AAAAATTTTGA | AAAAATTTTGACCCAGAAATCGAAAAATTCGC        |   |          |          |      |    |    |
| Cele.WB235  | Cele.WB235_5:18566411                   | 5 | 18566411 | 18566663 | 253  | 16 | 12 |
| AGGCTTAGGC  | AGGCCTAGGCTT                            |   |          |          |      |    |    |
| Cele.WB235  | Cele.WB235_5:18573477                   | 5 | 18573477 | 18573762 | 286  | 11 | 19 |
| TTGACGCAAT  | TTGACACAATTTTAGTACC                     |   |          |          |      |    |    |
| Cele.WB235  | Cele.WB235_5:18575312                   | 5 | 18575312 | 18575616 | 305  | 15 | 19 |
| TAGTGCCTTG  | TAGTGCCTTGATGCAATTT                     |   |          |          |      |    |    |
| Cele.WB235  | Cele.WB235_5:18577906                   | 5 | 18577906 | 18578272 | 367  | 11 | 33 |
| TGTCGGCTGC  | TGTCGGCTGCTAAACTGTAGCCACCCGGCAGG        |   |          |          |      |    |    |
| Cele.WB235  | Cele.WB235_5:18581399                   | 5 | 18581399 | 18581759 | 361  | 22 | 12 |
| AGCCTAAGCC  | AGCCTAAGCCTA                            |   |          |          |      |    |    |
| Cele.WB235  | Cele.WB235_5:18584208                   | 5 | 18584208 | 18585555 | 1348 | 50 | 20 |
| GTAAATCTAC  | GTAAATCTACATTGACATCC                    |   |          |          |      |    |    |
| Cele.WB235  | Cele.WB235_5:18588013                   | 5 | 18588013 | 18588271 | 259  | 18 | 12 |
| TAAGCCTAAG  | TAAGCCTAAGCC                            |   |          |          |      |    |    |
| Cele.WB235  | Cele.WB235_5:18597908                   | 5 | 18597908 | 18598040 | 133  | 9  | 12 |
| AGCCTAAGCC  | AGCCTAAGCCTA                            |   |          |          |      |    |    |
| Cele.WB235  | Cele.WB235_5:18616302                   | 5 | 18616302 | 18616398 | 97   | 6  | 12 |
| CTAAGCCTAA  | CTAATCCTAAGC                            |   |          |          |      |    |    |
| Cele.WB235  | Cele.WB235_5:18619123                   | 5 | 18619123 | 18619731 | 609  | 29 | 19 |
| GTGCCTTGAC  | GTGCTTTGACGCAATTCTA                     |   |          |          |      |    |    |
| Cele.WB235  | Cele.WB235_5:18632123                   | 5 | 18632123 | 18632283 | 161  | 8  | 20 |
| GATTTTCTG   | GATTTTCTTGAAAATTTATT                    |   |          |          |      |    |    |
| Cele.WB235  | Cele.WB235_5:18632668                   | 5 | 18632668 | 18632722 | 55   | 4  | 12 |
| TAAGCCTAAG  | TAAGCCTAGGCC                            |   |          |          |      |    |    |
| Cele.WB235  | Cele.WB235_5:18636764                   | 5 | 18636764 | 18637321 | 558  | 15 | 39 |
| GTAATTTATA  | GTAATTTATAATTTTTTAAAGATGAATAATAGATTGCCC |   |          |          |      |    |    |
| Cele.WB235  | Cele.WB235_5:18639700                   | 5 | 18639700 | 18639844 | 145  | 9  | 12 |
| GCTTAGGCTT  | GCTTCGGCTTAG                            |   |          |          |      |    |    |
| Cele.WB235  | Cele.WB235_5:18641364                   | 5 | 18641364 | 18641663 | 300  | 5  | 11 |
| TTTCAGGCCT  | TTTAGGCCTAC                             |   |          |          |      |    |    |
| Cele.WB235  | Cele.WB235_5:18644347                   | 5 | 18644347 | 18644921 | 575  | 24 | 21 |
| AAAAATCGAT  | AAAAATCGATAAAATATGGAG                   |   |          |          |      |    |    |
| Cele.WB235  | Cele.WB235_5:18666434                   | 5 | 18666434 | 18666663 | 230  | 6  | 35 |
| GGAAATTCAA  | GAAAATTCAAATTTTCTGAGAAAATTTTTTTGGC      |   |          |          |      |    |    |
| Cele.WB235  | Cele.WB235_5:18675402                   | 5 | 18675402 | 18675828 | 427  | 12 | 20 |
| AGAAAAATCA  | AGAAAAATCAATAAATTTT                     |   |          |          |      |    |    |
| Cele.WB235  | Cele.WB235_5:18676328                   | 5 | 18676328 | 18676917 | 590  | 23 | 19 |
| TGACGCAATT  | TGACGCATTTTGTAGTGCCT                    |   |          |          |      |    |    |
| Cele.WB235  | Cele.WB235_5:18677260                   | 5 | 18677260 | 18677830 | 571  | 26 | 19 |
| ACTAGAATTG  | ACTAGAAGTGCGCCAATAC                     |   |          |          |      |    |    |
| Cele.WB235  | Cele.WB235_5:18678760                   | 5 | 18678760 | 18678838 | 79   | 6  | 12 |
| GGCTCAGGCT  | GGCTCCGGCTCA                            |   |          |          |      |    |    |
| Cele.WB235  | Cele.WB235_5:18684513                   | 5 | 18684513 | 18684741 | 229  | 8  | 19 |
| TTCTAGTGCC  | TTCTAGTGCCTTGGCGCTT                     |   |          |          |      |    |    |
| Cele.WB235  | Cele.WB235_5:18722989                   | 5 | 18722989 | 18723101 | 113  | 7  | 12 |
| AGCCTGAGCC  | AGCCTGAGCCTG                            |   |          |          |      |    |    |
| Cele.WB235  | Cele.WB235_5:18727688                   | 5 | 18727688 | 18728599 | 912  | 46 | 20 |
| AAAAATAGAT  | AAAAATAGATTGTTACACGA                    |   |          |          |      |    |    |

|             |                                         |   |          |          |      |    |    |
|-------------|-----------------------------------------|---|----------|----------|------|----|----|
| Cele.WB235  | Cele.WB235_5:18737977                   | 5 | 18737977 | 18738195 | 219  | 6  | 31 |
| TGTAATAATG  | TGAAAAATGTCTGAAACTTCCAATTTACAA          |   |          |          |      |    |    |
| Cele.WB235  | Cele.WB235_5:18777092                   | 5 | 18777092 | 18777231 | 140  | 4  | 35 |
| TCAGAAAAATT | TCAGAAAAATTAAATTTCCCTCCAAAATTTTTTTC     |   |          |          |      |    |    |
| Cele.WB235  | Cele.WB235_5:18797535                   | 5 | 18797535 | 18797724 | 190  | 5  | 24 |
| GCCTAAGCCT  | GCCTAAACCTAACCCCGAGTCTAG                |   |          |          |      |    |    |
| Cele.WB235  | Cele.WB235_5:18855835                   | 5 | 18855835 | 18856039 | 205  | 6  | 31 |
| TCGTTTTTTC  | TCGTTTTTTCATGAAAAAACTCAATTTTCCG         |   |          |          |      |    |    |
| Cele.WB235  | Cele.WB235_5:18865200                   | 5 | 18865200 | 18865555 | 356  | 7  | 40 |
| GAATTTTTTG  | GAATTTTTTGCAATTTTATGAATTTTCCAAATTTTCAGC |   |          |          |      |    |    |
| Cele.WB235  | Cele.WB235_5:18879684                   | 5 | 18879684 | 18879863 | 180  | 5  | 40 |
| TTTTGCCGAA  | TTTTACCGAAAATTGCAAATTTGTGGAATGTATCACATT |   |          |          |      |    |    |
| Cele.WB235  | Cele.WB235_5:18881944                   | 5 | 18881944 | 18883813 | 1870 | 74 | 17 |
| ATTAGCAGCG  | TTAGCAGCGACCAAAAA                       |   |          |          |      |    |    |
| Cele.WB235  | Cele.WB235_5:18886295                   | 5 | 18886295 | 18887294 | 1000 | 12 | 18 |
| AATTAGCAGC  | AATTAGCAGCGACCAAAA                      |   |          |          |      |    |    |
| Cele.WB235  | Cele.WB235_5:18888872                   | 5 | 18888872 | 18889346 | 475  | 14 | 32 |
| TTGTAGTTTG  | TTGTAGTTTGTAGTCTAAGCAGCGCCCAAAAC        |   |          |          |      |    |    |
| Cele.WB235  | Cele.WB235_5:18940941                   | 5 | 18940941 | 18941109 | 169  | 8  | 21 |
| ATTATTGATT  | ATTATTGATTTTCAAGAAAA                    |   |          |          |      |    |    |
| Cele.WB235  | Cele.WB235_5:18964514                   | 5 | 18964514 | 18964623 | 110  | 6  | 18 |
| AGCAGCGCCC  | AGCAGCGCCCCAAAAAAA                      |   |          |          |      |    |    |
| Cele.WB235  | Cele.WB235_5:18966918                   | 5 | 18966918 | 18967045 | 128  | 5  | 18 |
| GCAGCGCCCA  | GCAGCGCCCCAAAAGATTA                     |   |          |          |      |    |    |
| Cele.WB235  | Cele.WB235_5:18970132                   | 5 | 18970132 | 18970454 | 323  | 18 | 18 |
| TGCTAATTTT  | TGCTAATTTTGTGGCGC                       |   |          |          |      |    |    |
| Cele.WB235  | Cele.WB235_5:18979816                   | 5 | 18979816 | 18980485 | 670  | 37 | 18 |
| GCGCTGCTAA  | GCGCTGCTAATTTTGTGG                      |   |          |          |      |    |    |
| Cele.WB235  | Cele.WB235_5:18984459                   | 5 | 18984459 | 18985309 | 851  | 31 | 20 |
| ATTTATTGAT  | ATTTATCGATTTTCTGTAA                     |   |          |          |      |    |    |
| Cele.WB235  | Cele.WB235_5:18986276                   | 5 | 18986276 | 18986397 | 122  | 6  | 20 |
| ATAAATTTTC  | ATAAATTTTCAGAAAAATCG                    |   |          |          |      |    |    |
| Cele.WB235  | Cele.WB235_5:18987130                   | 5 | 18987130 | 18987201 | 72   | 4  | 18 |
| TAGCAGCGCC  | TAGCAGCGCCCAAGAAAT                      |   |          |          |      |    |    |
| Cele.WB235  | Cele.WB235_5:18989479                   | 5 | 18989479 | 18989970 | 492  | 14 | 32 |
| TGTAGTTTGT  | TGTAGTTTGTAGTTTAGCAGCGCCCAAAATTG        |   |          |          |      |    |    |
| Cele.WB235  | Cele.WB235_5:18993608                   | 5 | 18993608 | 18993851 | 244  | 8  | 20 |
| TATCGATTTT  | TATCGATTTTCTGCAAATT                     |   |          |          |      |    |    |
| Cele.WB235  | Cele.WB235_5:19022623                   | 5 | 19022623 | 19023690 | 1068 | 10 | 19 |
| TGGCGCATTT  | TGGCGCGTTTTTCGGTGTGT                    |   |          |          |      |    |    |
| Cele.WB235  | Cele.WB235_5:19026746                   | 5 | 19026746 | 19027590 | 845  | 33 | 20 |
| AAAATCGATA  | ATAATCGATAAATTCACAGA                    |   |          |          |      |    |    |
| Cele.WB235  | Cele.WB235_5:19038887                   | 5 | 19038887 | 19039001 | 115  | 9  | 12 |
| ATACATATAC  | ATACATATACAT                            |   |          |          |      |    |    |
| Cele.WB235  | Cele.WB235_5:19043595                   | 5 | 19043595 | 19043791 | 197  | 8  | 12 |
| ATATGTATAT  | ATATGTATATGT                            |   |          |          |      |    |    |
| Cele.WB235  | Cele.WB235_5:19047920                   | 5 | 19047920 | 19048249 | 330  | 23 | 14 |
| TATATGTTAT  | TATATGTTATATGT                          |   |          |          |      |    |    |
| Cele.WB235  | Cele.WB235_5:19052161                   | 5 | 19052161 | 19052388 | 228  | 7  | 33 |
| GGAATTCAAA  | GGAATTCAAATTTCTTCAAAAAAATTTTGGCG        |   |          |          |      |    |    |
| Cele.WB235  | Cele.WB235_5:19065856                   | 5 | 19065856 | 19066708 | 853  | 32 | 26 |
| TGAAATTTCA  | TGAAATTTCAAAAATATCGATTTTC               |   |          |          |      |    |    |

|            |                                   |   |          |          |      |    |    |
|------------|-----------------------------------|---|----------|----------|------|----|----|
| Cele.WB235 | Cele.WB235_5:19099300             | 5 | 19099300 | 19100374 | 1075 | 31 | 20 |
| AAAAATCAAT | AAAAATCAATCAATTTCCGA              |   |          |          |      |    |    |
| Cele.WB235 | Cele.WB235_5:19100422             | 5 | 19100422 | 19100868 | 447  | 10 | 20 |
| ATTGATTTTT | ATTGATTTTTCTGAAAATT               |   |          |          |      |    |    |
| Cele.WB235 | Cele.WB235_5:19101640             | 5 | 19101640 | 19102041 | 402  | 17 | 20 |
| CAGAAAAATC | CAGAAAAATCGATAAATTTT              |   |          |          |      |    |    |
| Cele.WB235 | Cele.WB235_5:19106243             | 5 | 19106243 | 19106368 | 126  | 6  | 18 |
| ATTAGCAGCG | ATTAGCAGCGACCAAAAA                |   |          |          |      |    |    |
| Cele.WB235 | Cele.WB235_5:19112578             | 5 | 19112578 | 19114304 | 1727 | 66 | 20 |
| TATCGATTTT | TATTGATTTTTCTGAAAATT              |   |          |          |      |    |    |
| Cele.WB235 | Cele.WB235_5:19117969             | 5 | 19117969 | 19118122 | 154  | 5  | 33 |
| TTAGCAGCGC | TTAGCAGCGCCCAAAACTTGTAGTTTGTAGTC  |   |          |          |      |    |    |
| Cele.WB235 | Cele.WB235_5:19121195             | 5 | 19121195 | 19121753 | 559  | 25 | 20 |
| AATTTATTGA | AATTTATTGATTTTTCCGGA              |   |          |          |      |    |    |
| Cele.WB235 | Cele.WB235_5:19122509             | 5 | 19122509 | 19124474 | 1966 | 65 | 33 |
| AGCAGCGCCC | AGCAGCGCCCAAAATCTTGTAGTTTGTAGTCTT |   |          |          |      |    |    |
| Cele.WB235 | Cele.WB235_5:19129872             | 5 | 19129872 | 19130673 | 802  | 34 | 20 |
| GATTTTTCTG | GATTTTTCTGAAAATATATC              |   |          |          |      |    |    |
| Cele.WB235 | Cele.WB235_5:19148365             | 5 | 19148365 | 19148726 | 362  | 16 | 19 |
| TGGCGCATTT | TGGCGCATTTCTTGAGCCT               |   |          |          |      |    |    |
| Cele.WB235 | Cele.WB235_5:19193880             | 5 | 19193880 | 19195207 | 1328 | 74 | 18 |
| GCTGCTAATT | GCTGCTAATTTTGGGC                  |   |          |          |      |    |    |
| Cele.WB235 | Cele.WB235_5:19229130             | 5 | 19229130 | 19229634 | 505  | 37 | 12 |
| AGGCTCAGGC | AGGCTCAGGCTC                      |   |          |          |      |    |    |
| Cele.WB235 | Cele.WB235_5:19232598             | 5 | 19232598 | 19232808 | 211  | 15 | 12 |
| GCCTAAGCCT | GCCTGAGCCTGA                      |   |          |          |      |    |    |
| Cele.WB235 | Cele.WB235_5:19261027             | 5 | 19261027 | 19261174 | 148  | 7  | 21 |
| CACACGAGCT | CACACGATCTTCAGATTCCAC             |   |          |          |      |    |    |
| Cele.WB235 | Cele.WB235_5:19278568             | 5 | 19278568 | 19278735 | 168  | 5  | 29 |
| CTCGTCAGTG | CTCGTCAGTGGGTGGACGAGGAATGAGCG     |   |          |          |      |    |    |
| Cele.WB235 | Cele.WB235_5:19315501             | 5 | 19315501 | 19315626 | 126  | 4  | 22 |
| GTGCGCAGAA | GTGCGCAGAACTCTGCTCAGGGG           |   |          |          |      |    |    |
| Cele.WB235 | Cele.WB235_5:19354949             | 5 | 19354949 | 19355211 | 263  | 11 | 21 |
| TCTAATTAGA | TCAAATTAGATTACCTTTTTT             |   |          |          |      |    |    |
| Cele.WB235 | Cele.WB235_5:19356787             | 5 | 19356787 | 19357065 | 279  | 13 | 21 |
| TTCTAATTAG | TTCTAATTAGATGCGCATTCC             |   |          |          |      |    |    |
| Cele.WB235 | Cele.WB235_5:19372325             | 5 | 19372325 | 19372591 | 267  | 11 | 19 |
| GATCCTTGGC | GATCCTTAGCGCTTTTTTT               |   |          |          |      |    |    |
| Cele.WB235 | Cele.WB235_5:19373212             | 5 | 19373212 | 19373421 | 210  | 9  | 19 |
| TTGCGCCAAG | TTGCGTCAAGACACTAAAA               |   |          |          |      |    |    |
| Cele.WB235 | Cele.WB235_5:19376610             | 5 | 19376610 | 19376889 | 280  | 9  | 31 |
| CGGGAAATTC | CGGGAAATTCAAATTTTCAGTTAATTTTGT    |   |          |          |      |    |    |
| Cele.WB235 | Cele.WB235_5:19379891             | 5 | 19379891 | 19380043 | 153  | 5  | 19 |
| AGAATTGCGC | AGAATTGCGCCAAGGCACG               |   |          |          |      |    |    |
| Cele.WB235 | Cele.WB235_5:19380090             | 5 | 19380090 | 19380527 | 438  | 16 | 19 |
| GCCTTGACGC | GCCTTGACGCAATTCTAGT               |   |          |          |      |    |    |
| Cele.WB235 | Cele.WB235_5:19402253             | 5 | 19402253 | 19402490 | 238  | 14 | 17 |
| GAATTAGAAA | GAATTAGAAAACCTTTGA                |   |          |          |      |    |    |
| Cele.WB235 | Cele.WB235_5:19420419             | 5 | 19420419 | 19420546 | 128  | 5  | 25 |
| AAAAATCTGT | AAAAATCTGTTCTTCGAGGTCCTTA         |   |          |          |      |    |    |
| Cele.WB235 | Cele.WB235_5:19427400             | 5 | 19427400 | 19427634 | 235  | 7  | 22 |
| ACGTATACAG | ACGTATACAGGCATATACACAT            |   |          |          |      |    |    |

|              |                                                                                                                                         |   |          |          |      |    |     |
|--------------|-----------------------------------------------------------------------------------------------------------------------------------------|---|----------|----------|------|----|-----|
| Cele.WB235   | Cele.WB235_5:19427290                                                                                                                   | 5 | 19427290 | 19427806 | 517  | 5  | 21  |
| TATTTTCAAA   | TATTTTCAAAAAATTAAAA                                                                                                                     |   |          |          |      |    |     |
| Cele.WB235   | Cele.WB235_5:19466947                                                                                                                   | 5 | 19466947 | 19467275 | 329  | 4  | 82  |
| CCCCGAACGT   | CCCCGAACGTGTCGGCCGTTCCAAATAACCACCTCCTTGCACTACGTTGCGCACACACTCATTTACGCCAAGCTGCGGAA                                                        |   |          |          |      |    |     |
| Cele.WB235   | Cele.WB235_5:19487887                                                                                                                   | 5 | 19487887 | 19488024 | 138  | 6  | 23  |
| TTTTCAGAAA   | TTTTCAGAAATAGACATTTTCA                                                                                                                  |   |          |          |      |    |     |
| Cele.WB235   | Cele.WB235_5:19488506                                                                                                                   | 5 | 19488506 | 19489530 | 1025 | 58 | 17  |
| TTGCAAGAAA   | TTGCAAGAAAATCTGCA                                                                                                                       |   |          |          |      |    |     |
| Cele.WB235   | Cele.WB235_5:19495245                                                                                                                   | 5 | 19495245 | 19495315 | 71   | 5  | 10  |
| TGGCGAAAGC   | TGGCGAAAGC                                                                                                                              |   |          |          |      |    |     |
| Cele.WB235   | Cele.WB235_5:19495335                                                                                                                   | 5 | 19495335 | 19495400 | 66   | 5  | 13  |
| TTGGGGTGGG   | TTGGGGTGGGCCT                                                                                                                           |   |          |          |      |    |     |
| Cele.WB235   | Cele.WB235_5:19498459                                                                                                                   | 5 | 19498459 | 19499190 | 732  | 4  | 183 |
| TTTCTCTGCG   | TTTCTCTGCGTCTCGCCTTGGCTCACAGTATTTTTACACCAAACCTTCGAGGCTATGTATCTTTGCAACGGGTTGAGATATTGAAAAATTTCCAACCTAACAAAATGCTCTAAAATTTATTTCTGTATCTTGTGA |   |          |          |      |    |     |
| AATAAACTTTAA | AATAAACTTTAAACCCCTAGGCAAATCGCAAACAGCGAAATACACCCAAG                                                                                      |   |          |          |      |    |     |
| Cele.WB235   | Cele.WB235_5:19517965                                                                                                                   | 5 | 19517965 | 19518323 | 359  | 22 | 12  |
| CTTAGGCTTA   | CTTAGGCTTAGG                                                                                                                            |   |          |          |      |    |     |
| Cele.WB235   | Cele.WB235_5:19528638                                                                                                                   | 5 | 19528638 | 19528776 | 139  | 11 | 12  |
| CTTAGGCTTA   | CTTAGGCTTAGG                                                                                                                            |   |          |          |      |    |     |
| Cele.WB235   | Cele.WB235_5:19535226                                                                                                                   | 5 | 19535226 | 19535475 | 250  | 6  | 31  |
| AATTTCCCGC   | AATTTCCCGCTAAAATTTAACAGAAAAATTTA                                                                                                        |   |          |          |      |    |     |
| Cele.WB235   | Cele.WB235_5:19550939                                                                                                                   | 5 | 19550939 | 19551875 | 937  | 7  | 14  |
| TTTGTAGTTT   | TTTGTAGTTTGTGT                                                                                                                          |   |          |          |      |    |     |
| Cele.WB235   | Cele.WB235_5:19551915                                                                                                                   | 5 | 19551915 | 19552281 | 367  | 11 | 14  |
| ACAAACTACA   | ACAAACTACATACT                                                                                                                          |   |          |          |      |    |     |
| Cele.WB235   | Cele.WB235_5:19555359                                                                                                                   | 5 | 19555359 | 19555663 | 305  | 8  | 27  |
| GCAGCCGACA   | GCAGCCGACACCTCACAGGTCCTGTGA                                                                                                             |   |          |          |      |    |     |
| Cele.WB235   | Cele.WB235_5:19615691                                                                                                                   | 5 | 19615691 | 19616051 | 361  | 8  | 31  |
| TTCAAATTTT   | TTCAAATTTTCAGTCAATTTTGGCGGGAGT                                                                                                          |   |          |          |      |    |     |
| Cele.WB235   | Cele.WB235_5:19630875                                                                                                                   | 5 | 19630875 | 19631274 | 400  | 12 | 31  |
| GGCGGGAAAT   | GGCGGGAAATTCAAATTTTCAGTCAATTTT                                                                                                          |   |          |          |      |    |     |
| Cele.WB235   | Cele.WB235_5:19645096                                                                                                                   | 5 | 19645096 | 19645264 | 169  | 6  | 21  |
| ACCCCGATTT   | ACTCCGATTTTCATCCAAAAA                                                                                                                   |   |          |          |      |    |     |
| Cele.WB235   | Cele.WB235_5:19679307                                                                                                                   | 5 | 19679307 | 19679396 | 90   | 4  | 22  |
| ATTGGATTTT   | ATTGGATTTTTACCCCCAAAAA                                                                                                                  |   |          |          |      |    |     |
| Cele.WB235   | Cele.WB235_5:19689942                                                                                                                   | 5 | 19689942 | 19690431 | 490  | 10 | 31  |
| AAAATTTGAA   | AAAATTTGAATTTCCCGCCAAAAATTGACTG                                                                                                         |   |          |          |      |    |     |
| Cele.WB235   | Cele.WB235_5:19753320                                                                                                                   | 5 | 19753320 | 19753624 | 305  | 19 | 16  |
| CTTAGATCTC   | CTTAGATCTCAATTCA                                                                                                                        |   |          |          |      |    |     |
| Cele.WB235   | Cele.WB235_5:19755742                                                                                                                   | 5 | 19755742 | 19756252 | 511  | 14 | 34  |
| TTTCCCGCCA   | TTTCCCGCCAAAATAATTTCTCCGAAAATTTGTA                                                                                                      |   |          |          |      |    |     |
| Cele.WB235   | Cele.WB235_5:19762622                                                                                                                   | 5 | 19762622 | 19764008 | 1387 | 40 | 35  |
| CCGGCAAATC   | CCGGCAAATCGACAAATTGCCGGATTTGTAAATTT                                                                                                     |   |          |          |      |    |     |
| Cele.WB235   | Cele.WB235_5:19795837                                                                                                                   | 5 | 19795837 | 19797364 | 1528 | 40 | 35  |
| GAAATTTTCA   | GAAATTTTCATTTCCGGCAAATTACTGATCTGCCG                                                                                                     |   |          |          |      |    |     |
| Cele.WB235   | Cele.WB235_5:19799341                                                                                                                   | 5 | 19799341 | 19799769 | 429  | 12 | 35  |
| AATTTCCGGC   | AATTTCCGGCAATACGGCAAATTACCAGAATTAAA                                                                                                     |   |          |          |      |    |     |
| Cele.WB235   | Cele.WB235_5:19801650                                                                                                                   | 5 | 19801650 | 19801767 | 118  | 5  | 12  |
| AAGCCTAAGC   | AAGCCTAATCTT                                                                                                                            |   |          |          |      |    |     |
| Cele.WB235   | Cele.WB235_5:19821185                                                                                                                   | 5 | 19821185 | 19822021 | 837  | 37 | 19  |
| TAGTGCCTTG   | TAGTGCATTGGCGCAATTC                                                                                                                     |   |          |          |      |    |     |

|             |                                               |   |          |          |      |    |    |
|-------------|-----------------------------------------------|---|----------|----------|------|----|----|
| Cele.WB235  | Cele.WB235_5:19863556                         | 5 | 19863556 | 19864754 | 1199 | 28 | 31 |
| TTCCCCGCTA  | TTCCCCGCTAAAACTACTCGAAAATTCAAAT               |   |          |          |      |    |    |
| Cele.WB235  | Cele.WB235_5:19866564                         | 5 | 19866564 | 19867301 | 738  | 21 | 33 |
| TTTGAATTTT  | TTTGAATTTCCACCAAATATTTTCTCAAAAAT              |   |          |          |      |    |    |
| Cele.WB235  | Cele.WB235_5:19901870                         | 5 | 19901870 | 19902110 | 241  | 10 | 20 |
| TTATTGATTT  | TTATTGATTTTTCTGGGAAT                          |   |          |          |      |    |    |
| Cele.WB235  | Cele.WB235_5:19907460                         | 5 | 19907460 | 19907660 | 201  | 9  | 20 |
| CAGAAAAATC  | CAGAAAAATCAATAAAATTTT                         |   |          |          |      |    |    |
| Cele.WB235  | Cele.WB235_5:19909526                         | 5 | 19909526 | 19910097 | 572  | 12 | 20 |
| TTATTGATTT  | TTATCGATTTTTATGGAAAT                          |   |          |          |      |    |    |
| Cele.WB235  | Cele.WB235_5:19933050                         | 5 | 19933050 | 19934036 | 987  | 29 | 32 |
| ACTACAAACT  | ACTACAAACTACAAGTTTTTTGGCGCTGCTAA              |   |          |          |      |    |    |
| Cele.WB235  | Cele.WB235_5:19935725                         | 5 | 19935725 | 19935960 | 236  | 11 | 20 |
| TTTGAATTTT  | TTTGAATTTTTGAGTGAAAA                          |   |          |          |      |    |    |
| Cele.WB235  | Cele.WB235_5:19957566                         | 5 | 19957566 | 19957879 | 314  | 8  | 12 |
| TATGTATATG  | TATGTATATGTA                                  |   |          |          |      |    |    |
| Cele.WB235  | Cele.WB235_5:19963720                         | 5 | 19963720 | 19963804 | 85   | 4  | 21 |
| CTCAATTCAA  | CTCAATTCAATCAAGGAAATT                         |   |          |          |      |    |    |
| Cele.WB235  | Cele.WB235_5:19966309                         | 5 | 19966309 | 19966447 | 139  | 11 | 12 |
| ATATACATAT  | ATATACATATAC                                  |   |          |          |      |    |    |
| Cele.WB235  | Cele.WB235_5:19993167                         | 5 | 19993167 | 19993682 | 516  | 14 | 32 |
| AAATTTGAAT  | AAATTTGAATGTTTCGCCACAATTTTTCAAAAC             |   |          |          |      |    |    |
| Cele.WB235  | Cele.WB235_5:20001413                         | 5 | 20001413 | 20002864 | 1452 | 51 | 12 |
| GCTTGGGCTT  | GCTTGGGCTTAG                                  |   |          |          |      |    |    |
| Cele.WB235  | Cele.WB235_5:20101712                         | 5 | 20101712 | 20102976 | 1265 | 44 | 32 |
| TTTTGGGCGC  | TTTTGGGCGCTGCTTAGACTATAAACTACAAT              |   |          |          |      |    |    |
| Cele.WB235  | Cele.WB235_5:20153934                         | 5 | 20153934 | 20154193 | 260  | 7  | 37 |
| AATTTGAATT  | AATTTGAATTTCCGCCAAAACATTTTGTAAAAATTA          |   |          |          |      |    |    |
| Cele.WB235  | Cele.WB235_5:20210955                         | 5 | 20210955 | 20211513 | 559  | 29 | 18 |
| CATTGTCACT  | CATTGTCACTGGCTTCTC                            |   |          |          |      |    |    |
| Cele.WB235  | Cele.WB235_5:20236849                         | 5 | 20236849 | 20237152 | 304  | 5  | 41 |
| GCATTTTTTCG | GCATTTTTTCGCCGATTTTTTGATTAAATTTTCAGTTAAAAATTC |   |          |          |      |    |    |
| Cele.WB235  | Cele.WB235_5:20246749                         | 5 | 20246749 | 20247078 | 330  | 11 | 30 |
| CTCAAATTTG  | CTCAAATTTGCACTGAAAAATCCAATTATC                |   |          |          |      |    |    |
| Cele.WB235  | Cele.WB235_5:20260289                         | 5 | 20260289 | 20260916 | 628  | 16 | 11 |
| CTACAGTACT  | CTACAGTACTT                                   |   |          |          |      |    |    |
| Cele.WB235  | Cele.WB235_5:20263899                         | 5 | 20263899 | 20264125 | 227  | 7  | 32 |
| TTAGCAGCGC  | TTAGCAGCGCCCAAAATCTGTAGTTTGTAGT               |   |          |          |      |    |    |
| Cele.WB235  | Cele.WB235_5:20268029                         | 5 | 20268029 | 20268566 | 538  | 15 | 31 |
| CTACAAACTA  | CTACAAACTACTAGTTTTTGGGCGCTGCTAAG              |   |          |          |      |    |    |
| Cele.WB235  | Cele.WB235_5:20273044                         | 5 | 20273044 | 20275266 | 2223 | 68 | 31 |
| GGCGCTGCTA  | GGCGCTGCTAAACTACAAACTACAAGAATTG               |   |          |          |      |    |    |
| Cele.WB235  | Cele.WB235_5:20315897                         | 5 | 20315897 | 20316651 | 755  | 12 | 42 |
| ATTGCCGGTT  | ATTGCCGGTTTTGAACATTTTCGGCAATCGGCAATTTTCGGCA   |   |          |          |      |    |    |
| Cele.WB235  | Cele.WB235_5:20406247                         | 5 | 20406247 | 20406428 | 182  | 9  | 20 |
| AAAATTCAAA  | AAAATTCAAATTTTGACTG                           |   |          |          |      |    |    |
| Cele.WB235  | Cele.WB235_5:20407384                         | 5 | 20407384 | 20407602 | 219  | 4  | 31 |
| GAAAAAGTGC  | GAAAAAGTGCTGAAAATCACATTTTTGAACT               |   |          |          |      |    |    |
| Cele.WB235  | Cele.WB235_5:20471611                         | 5 | 20471611 | 20471894 | 284  | 9  | 32 |
| CCGCCAAAAT  | CCGCCAAAATTTTTTAAAGAAAATATGAATTC              |   |          |          |      |    |    |
| Cele.WB235  | Cele.WB235_5:20494724                         | 5 | 20494724 | 20495104 | 381  | 15 | 20 |
| TTTCACTAAA  | TTTCACTAAAACTTCAAAT                           |   |          |          |      |    |    |

|            |                                                                                                 |   |          |          |      |     |    |
|------------|-------------------------------------------------------------------------------------------------|---|----------|----------|------|-----|----|
| Cele.WB235 | Cele.WB235_5:20524563                                                                           | 5 | 20524563 | 20524679 | 117  | 5   | 16 |
| GTACTAGGGT | GTACTAGGGTACTAGG                                                                                |   |          |          |      |     |    |
| Cele.WB235 | Cele.WB235_5:20588792                                                                           | 5 | 20588792 | 20588997 | 206  | 5   | 11 |
| CCTACAGTAC | CCTACAGTACT                                                                                     |   |          |          |      |     |    |
| Cele.WB235 | Cele.WB235_5:20605796                                                                           | 5 | 20605796 | 20606242 | 447  | 40  | 11 |
| GTTGCGGTTG | GTTGCGGTTGC                                                                                     |   |          |          |      |     |    |
| Cele.WB235 | Cele.WB235_5:20705245                                                                           | 5 | 20705245 | 20705371 | 127  | 4   | 32 |
| GTGCGTCCGG | GTGCGTCCGGCGTCCGGAAAAAGCGGACGTGT                                                                |   |          |          |      |     |    |
| Cele.WB235 | Cele.WB235_5:20839492                                                                           | 5 | 20839492 | 20839569 | 78   | 5   | 15 |
| CGAAAAGGGG | CGAAAAGGGGATCTG                                                                                 |   |          |          |      |     |    |
| Cele.WB235 | Cele.WB235_5:20839745                                                                           | 5 | 20839745 | 20839822 | 78   | 5   | 15 |
| CCCCTTTTCG | CCCCTTTTCGTATCT                                                                                 |   |          |          |      |     |    |
| Cele.WB235 | Cele.WB235_5:20923994                                                                           | 5 | 20923994 | 20924168 | 175  | 14  | 12 |
| GCTTAGGCTT | GCTTAGGCTTAG                                                                                    |   |          |          |      |     |    |
| Cele.WB235 | Cele.WB235_6:0                                                                                  | 6 | 0        | 251      | 252  | 21  | 12 |
| CTAAGCCTAA | CTAAGCCTAAGC                                                                                    |   |          |          |      |     |    |
| Cele.WB235 | Cele.WB235_6:28398                                                                              | 6 | 28398    | 28532    | 135  | 5   | 11 |
| GTACTGTAGT | GTACTGTAGTA                                                                                     |   |          |          |      |     |    |
| Cele.WB235 | Cele.WB235_6:109717                                                                             | 6 | 109717   | 114226   | 4510 | 167 | 27 |
| CACAGAGAGT | CACAGAGAGTAAAATATAGTGGGAAGC                                                                     |   |          |          |      |     |    |
| Cele.WB235 | Cele.WB235_6:142149                                                                             | 6 | 142149   | 142814   | 666  | 19  | 35 |
| GCGGGAAATT | GCGGGAAATTCAAATTTTGTAGTAAAAATATTTTG                                                             |   |          |          |      |     |    |
| Cele.WB235 | Cele.WB235_6:142874                                                                             | 6 | 142874   | 143634   | 761  | 19  | 40 |
| GAAAAATCTG | GAAAAATCTGGAATGTTCCAGAACTTTCTAGAAAAATCGG                                                        |   |          |          |      |     |    |
| Cele.WB235 | Cele.WB235_6:161009                                                                             | 6 | 161009   | 161190   | 182  | 5   | 32 |
| TGTAGTTTGT | TGTAGTTTGTAGTGTTAGCAGCGCCCAAACT                                                                 |   |          |          |      |     |    |
| Cele.WB235 | Cele.WB235_6:161586                                                                             | 6 | 161586   | 161691   | 106  | 7   | 15 |
| GTCTCACCAC | GTCTCACCACGAAGG                                                                                 |   |          |          |      |     |    |
| Cele.WB235 | Cele.WB235_6:168652                                                                             | 6 | 168652   | 168890   | 239  | 6   | 40 |
| TTCCAGAATT | TTCCAGAATTTTCTCGATTTTCTAGAAAGTTCTGGAACA                                                         |   |          |          |      |     |    |
| Cele.WB235 | Cele.WB235_6:169222                                                                             | 6 | 169222   | 169627   | 406  | 27  | 15 |
| ACGATGGGTC | ACGATGGGTCTCACC                                                                                 |   |          |          |      |     |    |
| Cele.WB235 | Cele.WB235_6:188398                                                                             | 6 | 188398   | 190104   | 1707 | 53  | 32 |
| CGCTGCTAAG | CGCTGCTAAGACTACAACTACAAGTTTGGG                                                                  |   |          |          |      |     |    |
| Cele.WB235 | Cele.WB235_6:190303                                                                             | 6 | 190303   | 190811   | 509  | 10  | 20 |
| AAAAATCAAT | AAAAATCAATAAATTTCCAA                                                                            |   |          |          |      |     |    |
| Cele.WB235 | Cele.WB235_6:209349                                                                             | 6 | 209349   | 209653   | 305  | 8   | 36 |
| ATAAAAAATT | ATAAAAAATTTCCGGCAAACCGGCAATTTGTCAGAAA                                                           |   |          |          |      |     |    |
| Cele.WB235 | Cele.WB235_6:256843                                                                             | 6 | 256843   | 256905   | 63   | 4   | 15 |
| CGAAAAGGGG | CGAAAAGGGGATCTG                                                                                 |   |          |          |      |     |    |
| Cele.WB235 | Cele.WB235_6:257079                                                                             | 6 | 257079   | 257156   | 78   | 5   | 15 |
| TCCCCTTTTC | TCCCCTTTTCGTAGA                                                                                 |   |          |          |      |     |    |
| Cele.WB235 | Cele.WB235_6:311553                                                                             | 6 | 311553   | 312211   | 659  | 7   | 94 |
| GCAGTAATTC | GCAGTAATTCCTCAAAATCTTCTGTTCTCTAAATATTGGGTGCTTTTCGATGCCCTTTGTAGACAAATCAATGAGAAAATTGTCAATTTCTGAAG |   |          |          |      |     |    |
| Cele.WB235 | Cele.WB235_6:316974                                                                             | 6 | 316974   | 317093   | 120  | 8   | 14 |
| ATAGCGTATA | ATAGCGTATAGCGT                                                                                  |   |          |          |      |     |    |
| Cele.WB235 | Cele.WB235_6:404178                                                                             | 6 | 404178   | 404266   | 89   | 7   | 11 |
| CATAACTGAG | CATAACTGAGA                                                                                     |   |          |          |      |     |    |
| Cele.WB235 | Cele.WB235_6:443181                                                                             | 6 | 443181   | 444059   | 879  | 19  | 40 |
| AAAATTCTGG | AAAATTCTGGAAAGCTCTAGAACCTTCTGAAAAATTCGAG                                                        |   |          |          |      |     |    |
| Cele.WB235 | Cele.WB235_6:516173                                                                             | 6 | 516173   | 516819   | 647  | 15  | 15 |
| CCACGATGGG | CCACGGTGGGTCTCA                                                                                 |   |          |          |      |     |    |

|            |                                                                                                        |   |         |         |      |    |     |
|------------|--------------------------------------------------------------------------------------------------------|---|---------|---------|------|----|-----|
| Cele.WB235 | Cele.WB235_6:516878                                                                                    | 6 | 516878  | 517017  | 140  | 5  | 30  |
| AATTTTCCAG | AATTTTCCAGAAGGTTCTGGAACATTCCAG                                                                         |   |         |         |      |    |     |
| Cele.WB235 | Cele.WB235_6:703442                                                                                    | 6 | 703442  | 703568  | 127  | 5  | 21  |
| GGTCAGTGCA | GGTCAGTGCAATTACCAATGTT                                                                                 |   |         |         |      |    |     |
| Cele.WB235 | Cele.WB235_6:723810                                                                                    | 6 | 723810  | 724054  | 245  | 5  | 22  |
| TGGTCAGTGC | TGGTCAGAGCTGGCGGCCAATC                                                                                 |   |         |         |      |    |     |
| Cele.WB235 | Cele.WB235_6:863878                                                                                    | 6 | 863878  | 863962  | 85   | 4  | 21  |
| ACTGACCAAA | ACTGACCAAAAATAGACATGC                                                                                  |   |         |         |      |    |     |
| Cele.WB235 | Cele.WB235_6:920806                                                                                    | 6 | 920806  | 920909  | 104  | 5  | 20  |
| ATGCACTGAC | ATGCACTGACCGAAAATATG                                                                                   |   |         |         |      |    |     |
| Cele.WB235 | Cele.WB235_6:943488                                                                                    | 6 | 943488  | 943966  | 479  | 11 | 15  |
| CACGATGGGT | CACGATGGGTCTCGT                                                                                        |   |         |         |      |    |     |
| Cele.WB235 | Cele.WB235_6:944053                                                                                    | 6 | 944053  | 944332  | 280  | 13 | 11  |
| CTACAGTACT | CTACAGTACCT                                                                                            |   |         |         |      |    |     |
| Cele.WB235 | Cele.WB235_6:954503                                                                                    | 6 | 954503  | 954587  | 85   | 4  | 21  |
| CAGTGCATT  | CAGTGCATTGAGAACTTTGAT                                                                                  |   |         |         |      |    |     |
| Cele.WB235 | Cele.WB235_6:954523                                                                                    | 6 | 954523  | 954714  | 192  | 6  | 21  |
| TCAGTGCATT | TCAGTGCATTCCGAACCTTCG                                                                                  |   |         |         |      |    |     |
| Cele.WB235 | Cele.WB235_6:988793                                                                                    | 6 | 988793  | 988877  | 85   | 4  | 21  |
| TGGTCAGTGC | TGGTCAGTGCAAGAAACAATT                                                                                  |   |         |         |      |    |     |
| Cele.WB235 | Cele.WB235_6:1008023                                                                                   | 6 | 1008023 | 1008695 | 673  | 4  | 21  |
| TGACAAAACA | TGACAAAACATAACTTTGCAC                                                                                  |   |         |         |      |    |     |
| Cele.WB235 | Cele.WB235_6:1016701                                                                                   | 6 | 1016701 | 1016827 | 127  | 6  | 21  |
| GTCAGTGCAT | GTCAGTGCATTGATAGTTTCT                                                                                  |   |         |         |      |    |     |
| Cele.WB235 | Cele.WB235_6:1022677                                                                                   | 6 | 1022677 | 1022779 | 103  | 5  | 20  |
| TTGGTCAGTG | TTGGTCAGTGCAATTTTAGTC                                                                                  |   |         |         |      |    |     |
| Cele.WB235 | Cele.WB235_6:1058514                                                                                   | 6 | 1058514 | 1058619 | 106  | 4  | 21  |
| GTCAGTGCAA | GTCAGTGTAATTAGAATAATG                                                                                  |   |         |         |      |    |     |
| Cele.WB235 | Cele.WB235_6:1062534                                                                                   | 6 | 1062534 | 1062618 | 85   | 4  | 21  |
| GTCAGTGCAA | GTCAGTGCAAATTCAAATATT                                                                                  |   |         |         |      |    |     |
| Cele.WB235 | Cele.WB235_6:1094209                                                                                   | 6 | 1094209 | 1094314 | 106  | 5  | 21  |
| TTGGTCAGTG | TTGGTCAGTGCGATTTTTTTAA                                                                                 |   |         |         |      |    |     |
| Cele.WB235 | Cele.WB235_6:1136184                                                                                   | 6 | 1136184 | 1140765 | 4582 | 45 | 102 |
| TGTACACTTC | TGTACACTTCTCCAAAATGACTGTAAGAATGGACTCCTTATATGATTTTTAAACCCGACTCTGGACATACAAACTTCTCTCAAAAAGAAAATAGACTTCACA |   |         |         |      |    |     |
| Cele.WB235 | Cele.WB235_6:1214446                                                                                   | 6 | 1214446 | 1215096 | 651  | 6  | 21  |
| GTCAGTGCAA | GTCAGTGCAAAAGTATTTTTTG                                                                                 |   |         |         |      |    |     |
| Cele.WB235 | Cele.WB235_6:1278787                                                                                   | 6 | 1278787 | 1279105 | 319  | 7  | 22  |
| GTCAGTGCAA | GTCAGTGCAAATTGTGCACATG                                                                                 |   |         |         |      |    |     |
| Cele.WB235 | Cele.WB235_6:1292997                                                                                   | 6 | 1292997 | 1293291 | 295  | 14 | 21  |
| TTTGCACTGA | TTTGCACTGACCAACACGAAT                                                                                  |   |         |         |      |    |     |
| Cele.WB235 | Cele.WB235_6:1296886                                                                                   | 6 | 1296886 | 1296996 | 111  | 5  | 22  |
| TCGCACTGAC | TCGCACTGACCAAACTTAGAAA                                                                                 |   |         |         |      |    |     |
| Cele.WB235 | Cele.WB235_6:1320585                                                                                   | 6 | 1320585 | 1320992 | 408  | 5  | 21  |
| TTGCACTGAC | TTGCACTGACCAAAATTAAGC                                                                                  |   |         |         |      |    |     |
| Cele.WB235 | Cele.WB235_6:1325710                                                                                   | 6 | 1325710 | 1325901 | 192  | 7  | 21  |
| TTGCACTGAC | TTGAACTGACAAAGTGCAAAT                                                                                  |   |         |         |      |    |     |
| Cele.WB235 | Cele.WB235_6:1334194                                                                                   | 6 | 1334194 | 1334262 | 69   | 4  | 17  |
| TGGTCAGTGC | TGGTCAGTGCAAAAAGT                                                                                      |   |         |         |      |    |     |
| Cele.WB235 | Cele.WB235_6:1375049                                                                                   | 6 | 1375049 | 1375406 | 358  | 9  | 40  |
| ATTTTCTAG  | ATTTTCTAGAAAGTTCTGGAACACTCCAGAATTTCTCG                                                                 |   |         |         |      |    |     |
| Cele.WB235 | Cele.WB235_6:1375505                                                                                   | 6 | 1375505 | 1376170 | 666  | 19 | 35  |
| CCCGCCAAAA | CCCGCCAAAAATTTTTTCACAGAAAAATTAAATTT                                                                    |   |         |         |      |    |     |



|                                                                                                                                     |                                                                                                              |   |         |         |      |     |     |
|-------------------------------------------------------------------------------------------------------------------------------------|--------------------------------------------------------------------------------------------------------------|---|---------|---------|------|-----|-----|
| Cele.WB235                                                                                                                          | Cele.WB235_6:1376205                                                                                         | 6 | 1376205 | 1376549 | 345  | 23  | 15  |
| CGATGGGTCT                                                                                                                          | CGATGGGTCTCACCT                                                                                              |   |         |         |      |     |     |
| Cele.WB235                                                                                                                          | Cele.WB235_6:1376606                                                                                         | 6 | 1376606 | 1376746 | 141  | 5   | 30  |
| AATTTTCCAG                                                                                                                          | AATTTTCCAGAAAGTTCTGGAACATTCCAG                                                                               |   |         |         |      |     |     |
| Cele.WB235                                                                                                                          | Cele.WB235_6:1376859                                                                                         | 6 | 1376859 | 1377239 | 381  | 13  | 11  |
| GTACTCCTAC                                                                                                                          | GTACTCCTACA                                                                                                  |   |         |         |      |     |     |
| Cele.WB235                                                                                                                          | Cele.WB235_6:1508523                                                                                         | 6 | 1508523 | 1508943 | 421  | 18  | 20  |
| AGGCAGACCT                                                                                                                          | AGGCAGACCTAGCCTACCCT                                                                                         |   |         |         |      |     |     |
| Cele.WB235                                                                                                                          | Cele.WB235_6:1509783                                                                                         | 6 | 1509783 | 1509855 | 73   | 5   | 12  |
| CTAAGCCTAA                                                                                                                          | CTAAGCCAAAGA                                                                                                 |   |         |         |      |     |     |
| Cele.WB235                                                                                                                          | Cele.WB235_6:1524262                                                                                         | 6 | 1524262 | 1524376 | 115  | 5   | 23  |
| AAAAAATTTG                                                                                                                          | AAAAAATTTGTTTCGCACTGAAC                                                                                      |   |         |         |      |     |     |
| Cele.WB235                                                                                                                          | Cele.WB235_6:1544700                                                                                         | 6 | 1544700 | 1544784 | 85   | 4   | 21  |
| TCTGAGCACT                                                                                                                          | TCTGAGCACTGACCAAAATTA                                                                                        |   |         |         |      |     |     |
| Cele.WB235                                                                                                                          | Cele.WB235_6:1548656                                                                                         | 6 | 1548656 | 1549346 | 691  | 19  | 30  |
| ACTACCCAAC                                                                                                                          | ACTACCCAACCGGCTCCGGCAACTAGTCCG                                                                               |   |         |         |      |     |     |
| Cele.WB235                                                                                                                          | Cele.WB235_6:1549825                                                                                         | 6 | 1549825 | 1550305 | 481  | 5   | 108 |
| ATCCTCAACA                                                                                                                          | ATCCTCAACACCATCTGCATCATCTAGCTCTTCCGGAACGATGTCGACTATTTTCAGGATCAACTGGTTCACAGTTACAGTCGTGCCTGGATCCTCTAGCACATTTGC |   |         |         |      |     |     |
| Cele.WB235                                                                                                                          | Cele.WB235_6:1610992                                                                                         | 6 | 1610992 | 1611280 | 289  | 10  | 11  |
| GTACTGTAGG                                                                                                                          | GTACTGTAGTA                                                                                                  |   |         |         |      |     |     |
| Cele.WB235                                                                                                                          | Cele.WB235_6:1636150                                                                                         | 6 | 1636150 | 1638568 | 2419 | 93  | 26  |
| GGTGAACGGT                                                                                                                          | GGTGAACGGTCAGAGTCACCTATTTTT                                                                                  |   |         |         |      |     |     |
| Cele.WB235                                                                                                                          | Cele.WB235_6:1642568                                                                                         | 6 | 1642568 | 1643478 | 911  | 35  | 26  |
| GACTCTAACC                                                                                                                          | GACTCTAACCATTACCTAAAAATAT                                                                                    |   |         |         |      |     |     |
| Cele.WB235                                                                                                                          | Cele.WB235_6:1643531                                                                                         | 6 | 1643531 | 1644396 | 866  | 34  | 11  |
| GGAGCGGTTT                                                                                                                          | GGAGCGGTTTT                                                                                                  |   |         |         |      |     |     |
| Cele.WB235                                                                                                                          | Cele.WB235_6:1644418                                                                                         | 6 | 1644418 | 1644678 | 261  | 10  | 26  |
| GCCGCAATGC                                                                                                                          | GCCGCAATGCCATTTTTCTGAAATCC                                                                                   |   |         |         |      |     |     |
| Cele.WB235                                                                                                                          | Cele.WB235_6:1718471                                                                                         | 6 | 1718471 | 1719647 | 1177 | 4   | 165 |
| CTTTTCCAAA                                                                                                                          |                                                                                                              |   |         |         |      |     |     |
| CTTTTCCAAAATGGCAATTTTTGATGAAAAAATCCGAATTTTCACAAATTTCAAAAAATTTTTAACTTTTATAATTTTAGCTTTGAATATTCCAAATGGAACGTGCATAACCTATCAATTTGATATATAAA |                                                                                                              |   |         |         |      |     |     |
| CTCGTGCC'TACCTTCAGGCATTACGTTTTCAC                                                                                                   |                                                                                                              |   |         |         |      |     |     |
| Cele.WB235                                                                                                                          | Cele.WB235_6:1752278                                                                                         | 6 | 1752278 | 1755168 | 2891 | 107 | 27  |
| ACTCTCTGTG                                                                                                                          | ACTCTCTGTGGCTTCCCACCATATTTT                                                                                  |   |         |         |      |     |     |
| Cele.WB235                                                                                                                          | Cele.WB235_6:1836329                                                                                         | 6 | 1836329 | 1837109 | 781  | 39  | 18  |
| AAGCCTATGC                                                                                                                          | AAGCCTATGCCGAAGCCG                                                                                           |   |         |         |      |     |     |
| Cele.WB235                                                                                                                          | Cele.WB235_6:1850672                                                                                         | 6 | 1850672 | 1850839 | 168  | 11  | 14  |
| TAGGCCCTCA                                                                                                                          | TAGGCCCTCAAGCG                                                                                               |   |         |         |      |     |     |
| Cele.WB235                                                                                                                          | Cele.WB235_6:1916196                                                                                         | 6 | 1916196 | 1916614 | 419  | 14  | 22  |
| CCGGCGTGGT                                                                                                                          | CCGGCGTGGTTTGAAGCCGACA                                                                                       |   |         |         |      |     |     |
| Cele.WB235                                                                                                                          | Cele.WB235_6:1945521                                                                                         | 6 | 1945521 | 1946157 | 637  | 32  | 20  |
| GTTACACGAA                                                                                                                          | GTTACACGAAAAAATAGATT                                                                                         |   |         |         |      |     |     |
| Cele.WB235                                                                                                                          | Cele.WB235_6:1954050                                                                                         | 6 | 1954050 | 1954308 | 259  | 13  | 20  |
| GTTACACGAA                                                                                                                          | GTTACACGAAAAAATAGATT                                                                                         |   |         |         |      |     |     |
| Cele.WB235                                                                                                                          | Cele.WB235_6:1980629                                                                                         | 6 | 1980629 | 1980811 | 183  | 4   | 46  |
| TGGTAAATTG                                                                                                                          | TGGTAAATTGCTTCCCGGATCACGCATTTTCTTATTTCCCTAACTA                                                               |   |         |         |      |     |     |
| Cele.WB235                                                                                                                          | Cele.WB235_6:2002759                                                                                         | 6 | 2002759 | 2003439 | 681  | 17  | 40  |
| GAATTTTCTC                                                                                                                          | GAATTTTCTCGATTTTCTAGAAAGTTCTGGAACATTCCA                                                                      |   |         |         |      |     |     |
| Cele.WB235                                                                                                                          | Cele.WB235_6:2004050                                                                                         | 6 | 2004050 | 2004599 | 550  | 27  | 19  |
| ATATTTATTT                                                                                                                          | ATATTTATTTATTTAATTA                                                                                          |   |         |         |      |     |     |
| Cele.WB235                                                                                                                          | Cele.WB235_6:2010907                                                                                         | 6 | 2010907 | 2011305 | 399  | 28  | 12  |
| AATAAATAAC                                                                                                                          | AATAAATAAATA                                                                                                 |   |         |         |      |     |     |

|             |                                                |   |         |         |       |     |     |
|-------------|------------------------------------------------|---|---------|---------|-------|-----|-----|
| Cele.WB235  | Cele.WB235_6:2055472                           | 6 | 2055472 | 2055647 | 176   | 7   | 25  |
| TATATTTTAC  | TATATTTTACTCTCTGGCATCACAC                      |   |         |         |       |     |     |
| Cele.WB235  | Cele.WB235_6:2056950                           | 6 | 2056950 | 2057275 | 326   | 12  | 25  |
| TCTGGCTTCA  | TCTGGCTTCACAGTAAAAATTACTA                      |   |         |         |       |     |     |
| Cele.WB235  | Cele.WB235_6:2057847                           | 6 | 2057847 | 2058368 | 522   | 13  | 40  |
| TTTTCTCGAT  | TTTTCTCGATATTTCTAGAAAAGTTCTGGAACATTCCAGAA      |   |         |         |       |     |     |
| Cele.WB235  | Cele.WB235_6:2057868                           | 6 | 2057868 | 2059356 | 1489  | 20  | 40  |
| GTTCTGGAAC  | GTTCTGGAACATTCCAGAATTTTCTCGATATTTCTAGAAA       |   |         |         |       |     |     |
| Cele.WB235  | Cele.WB235_6:2263547                           | 6 | 2263547 | 2263756 | 210   | 16  | 11  |
| CCATACCTAT  | CCATACCTATA                                    |   |         |         |       |     |     |
| Cele.WB235  | Cele.WB235_6:2307188                           | 6 | 2307188 | 2307299 | 112   | 4   | 32  |
| CGACCTGCGA  | CGACCTGCGACCTAGAGGGTTAGGTCGCATCG               |   |         |         |       |     |     |
| Cele.WB235  | Cele.WB235_6:2379254                           | 6 | 2379254 | 2380684 | 1431  | 55  | 26  |
| TTTGTAGTAA  | TTTGTAGTAACTGCCAGAGTCACTAA                     |   |         |         |       |     |     |
| Cele.WB235  | Cele.WB235_6:2563170                           | 6 | 2563170 | 2563230 | 61    | 5   | 12  |
| AGGCTTAGGC  | AGGCTTAGGCTA                                   |   |         |         |       |     |     |
| Cele.WB235  | Cele.WB235_6:2989994                           | 6 | 2989994 | 2990074 | 81    | 5   | 16  |
| AGAGAGTATA  | AGAGAGTATAGATTAG                               |   |         |         |       |     |     |
| Cele.WB235  | Cele.WB235_6:2991583                           | 6 | 2991583 | 2991919 | 337   | 7   | 48  |
| AAGATGAGGA  | AAGATGAGGAATTTAATTTTGTATTGCCCGTAATTTATATTTTCTG |   |         |         |       |     |     |
| Cele.WB235  | Cele.WB235_6:3007216                           | 6 | 3007216 | 3008016 | 801   | 42  | 19  |
| GTGTAACAAT  | GTGTAACAATCTATTTTC                             |   |         |         |       |     |     |
| Cele.WB235  | Cele.WB235_6:3075483                           | 6 | 3075483 | 3075588 | 106   | 7   | 15  |
| TCACCACGAT  | TCACCACGATGGGTC                                |   |         |         |       |     |     |
| Cele.WB235  | Cele.WB235_6:3261930                           | 6 | 3261930 | 3262051 | 122   | 11  | 11  |
| AAAATGTGCT  | AAAATGTGCTG                                    |   |         |         |       |     |     |
| Cele.WB235  | Cele.WB235_6:3338986                           | 6 | 3338986 | 3339541 | 556   | 27  | 18  |
| TTTTGTTCAGT | TTTTGTTCAGTGCCTATAGT                           |   |         |         |       |     |     |
| Cele.WB235  | Cele.WB235_6:3347373                           | 6 | 3347373 | 3347577 | 205   | 10  | 17  |
| TTTAAACGTG  | TTTAAACGTGACCTAGT                              |   |         |         |       |     |     |
| Cele.WB235  | Cele.WB235_6:3365934                           | 6 | 3365934 | 3366110 | 177   | 12  | 11  |
| TAGCTCAGCT  | TAGCTCAGCTT                                    |   |         |         |       |     |     |
| Cele.WB235  | Cele.WB235_6:3392053                           | 6 | 3392053 | 3392273 | 221   | 10  | 18  |
| TTGTCAGTGC  | TTGTCAGTGCATGGTTT                              |   |         |         |       |     |     |
| Cele.WB235  | Cele.WB235_6:3631392                           | 6 | 3631392 | 3631893 | 502   | 43  | 11  |
| CAGTTGTCAC  | CAGTTGTCACC                                    |   |         |         |       |     |     |
| Cele.WB235  | Cele.WB235_6:3693989                           | 6 | 3693989 | 3694090 | 102   | 5   | 20  |
| TTTGGTCAGT  | TTTGGTCAGTGCTTTTTCGAC                          |   |         |         |       |     |     |
| Cele.WB235  | Cele.WB235_6:3713912                           | 6 | 3713912 | 3714032 | 121   | 5   | 20  |
| CCATGTAGCT  | CAATGTAGCTACATAGTTTC                           |   |         |         |       |     |     |
| Cele.WB235  | Cele.WB235_6:3924546                           | 6 | 3924546 | 3924685 | 140   | 7   | 20  |
| AAAATAGATT  | AAAATAGATTGACATAACCAG                          |   |         |         |       |     |     |
| Cele.WB235  | Cele.WB235_6:4026010                           | 6 | 4026010 | 4030548 | 4539  | 181 | 25  |
| GTTCTGCCAA  | GTTCTGCCAATTTATTACTCCAAT                       |   |         |         |       |     |     |
| Cele.WB235  | Cele.WB235_6:4030571                           | 6 | 4030571 | 4031446 | 876   | 34  | 25  |
| ATTGGCAGAA  | ATTGGCAGAACATTAGAGTAAATAT                      |   |         |         |       |     |     |
| Cele.WB235  | Cele.WB235_6:4031472                           | 6 | 4031472 | 4056497 | 25026 | 496 | 20  |
| GCTATATCGT  | GCTATATCGTATCGTAAATA                           |   |         |         |       |     |     |
| Cele.WB235  | Cele.WB235_6:4285394                           | 6 | 4285394 | 4285533 | 140   | 7   | 20  |
| ACAGACGAAA  | ACAGACGAAAAATAGGTTG                            |   |         |         |       |     |     |
| Cele.WB235  | Cele.WB235_6:5045129                           | 6 | 5045129 | 5051107 | 5979  | 23  | 226 |
| GAAAATTCAT  |                                                |   |         |         |       |     |     |

|                                                                                                                                       |                                                                                                |   |         |         |      |     |     |
|---------------------------------------------------------------------------------------------------------------------------------------|------------------------------------------------------------------------------------------------|---|---------|---------|------|-----|-----|
| GAAAAATTCATAAATCTCTTCAAAGTAACTTTTTTATAAATGTCTTTCAGAAACTTTGTAGTAAATTTTAAGCTCTTCTGAATATATTAACAATATTCCAGTAGGTACAAGAAGCTTCACGTAGTTACAGAAA |                                                                                                |   |         |         |      |     |     |
| TAGTACATTTTCAGCCCTACCTTTTAGTGCGTATTTTATTATTAAATGAAAACACCATATATAGACAAAAATAGATGAATTTTCGTAATTGT                                          |                                                                                                |   |         |         |      |     |     |
| Cele.WB235                                                                                                                            | Cele.WB235_6:5045783                                                                           | 6 | 5045783 | 5053744 | 7962 | 32  | 226 |
| ATGAATTTTC                                                                                                                            |                                                                                                |   |         |         |      |     |     |
| ATGAATTTTCGTAATTGTGAAAATTCATAAATCTCTTCAAAGTAACTTTTTTATAAATGTCTTTCAGAAACTTTATAGTAAATTTTAAGCTCTTCTGAATATATTAACAATATTCCAGTAGGTACAAGAAGC  |                                                                                                |   |         |         |      |     |     |
| TTCACGTAGTTACAGAAATAGTACATTTTCAGCCCTACCTTTTAGTGCGTATTTTGTATTAAATGAAAACACCATTTTATAGGCAAAAAATAG                                         |                                                                                                |   |         |         |      |     |     |
| Cele.WB235                                                                                                                            | Cele.WB235_6:5056273                                                                           | 6 | 5056273 | 5057278 | 1006 | 38  | 27  |
| TATTTTACTC                                                                                                                            | TATTTTACTCTCTGTGGCTTCCACTA                                                                     |   |         |         |      |     |     |
| Cele.WB235                                                                                                                            | Cele.WB235_6:5125291                                                                           | 6 | 5125291 | 5125369 | 79   | 6   | 13  |
| GCCATAGGCG                                                                                                                            | GCCATAGGCGTAA                                                                                  |   |         |         |      |     |     |
| Cele.WB235                                                                                                                            | Cele.WB235_6:5227815                                                                           | 6 | 5227815 | 5227935 | 121  | 8   | 15  |
| TGGTGAGACC                                                                                                                            | TGGTGAGACCCATCC                                                                                |   |         |         |      |     |     |
| Cele.WB235                                                                                                                            | Cele.WB235_6:5229333                                                                           | 6 | 5229333 | 5229440 | 108  | 5   | 23  |
| AATAAATATT                                                                                                                            | AATAAATATTAATTAATTAATG                                                                         |   |         |         |      |     |     |
| Cele.WB235                                                                                                                            | Cele.WB235_6:5229858                                                                           | 6 | 5229858 | 5230323 | 466  | 31  | 15  |
| CCACGATGGG                                                                                                                            | CCACGATGGGTCTCA                                                                                |   |         |         |      |     |     |
| Cele.WB235                                                                                                                            | Cele.WB235_6:5230547                                                                           | 6 | 5230547 | 5230804 | 258  | 10  | 11  |
| CTACAGTACT                                                                                                                            | CTACAGTACTA                                                                                    |   |         |         |      |     |     |
| Cele.WB235                                                                                                                            | Cele.WB235_6:5542238                                                                           | 6 | 5542238 | 5542420 | 183  | 7   | 26  |
| TAGTGACTCT                                                                                                                            | TAGTGACTCTGGCCGTTCACTATAAT                                                                     |   |         |         |      |     |     |
| Cele.WB235                                                                                                                            | Cele.WB235_6:5913335                                                                           | 6 | 5913335 | 5915857 | 2523 | 97  | 26  |
| TTCTAAATTT                                                                                                                            | TTCTAAATTTGAAAATTCATCTACCG                                                                     |   |         |         |      |     |     |
| Cele.WB235                                                                                                                            | Cele.WB235_6:6114472                                                                           | 6 | 6114472 | 6114558 | 87   | 5   | 17  |
| TAATTACTGG                                                                                                                            | TAATTACTGGAATAAAA                                                                              |   |         |         |      |     |     |
| Cele.WB235                                                                                                                            | Cele.WB235_6:6212839                                                                           | 6 | 6212839 | 6212968 | 130  | 8   | 16  |
| GCACTGACAA                                                                                                                            | GCACTGACAATTTTAA                                                                               |   |         |         |      |     |     |
| Cele.WB235                                                                                                                            | Cele.WB235_6:6826365                                                                           | 6 | 6826365 | 6830125 | 3761 | 40  | 94  |
| TGCCTTCAGA                                                                                                                            | TGCCTTCAGAAATTGACAATTTTCCCATTTGATTGTCTACATAGGGCATCGAAAAGCACCCAATATTTAGAGAACAGAAGATTTTGAGAATTAC |   |         |         |      |     |     |
| Cele.WB235                                                                                                                            | Cele.WB235_6:7077538                                                                           | 6 | 7077538 | 7079254 | 1717 | 55  | 20  |
| TCGTTTATAG                                                                                                                            | TCGTTTATAGCAGTGTCTGTG                                                                          |   |         |         |      |     |     |
| Cele.WB235                                                                                                                            | Cele.WB235_6:7081038                                                                           | 6 | 7081038 | 7081216 | 179  | 9   | 20  |
| TTTTTCGTCT                                                                                                                            | TTTTTCGTCTGTCAATCTAT                                                                           |   |         |         |      |     |     |
| Cele.WB235                                                                                                                            | Cele.WB235_6:7351473                                                                           | 6 | 7351473 | 7361391 | 9919 | 248 | 40  |
| AATGGGCGCC                                                                                                                            | AATGGGCGCCGTTTCGCTTTGAGCGATTCCTTACCCTTA                                                        |   |         |         |      |     |     |
| Cele.WB235                                                                                                                            | Cele.WB235_6:7574716                                                                           | 6 | 7574716 | 7575007 | 292  | 5   | 18  |
| TAGTCTTGCA                                                                                                                            | TAGTCTTGCACTCTCTAA                                                                             |   |         |         |      |     |     |
| Cele.WB235                                                                                                                            | Cele.WB235_6:7686957                                                                           | 6 | 7686957 | 7687172 | 216  | 6   | 12  |
| TCTTCCTCCT                                                                                                                            | TCTTCCTCCTCC                                                                                   |   |         |         |      |     |     |
| Cele.WB235                                                                                                                            | Cele.WB235_6:7879877                                                                           | 6 | 7879877 | 7880045 | 169  | 7   | 24  |
| GGTGGCTGGT                                                                                                                            | GGTGGCTGGTCACAAAAGTAAGTT                                                                       |   |         |         |      |     |     |
| Cele.WB235                                                                                                                            | Cele.WB235_6:7895537                                                                           | 6 | 7895537 | 7895652 | 116  | 6   | 19  |
| CAGACGAAAA                                                                                                                            | CAGACGAAAAATATATTGG                                                                            |   |         |         |      |     |     |
| Cele.WB235                                                                                                                            | Cele.WB235_6:7918015                                                                           | 6 | 7918015 | 7918071 | 57   | 4   | 14  |
| TTACCAAAAT                                                                                                                            | TTACCAAAATCTAG                                                                                 |   |         |         |      |     |     |
| Cele.WB235                                                                                                                            | Cele.WB235_6:8181963                                                                           | 6 | 8181963 | 8182276 | 314  | 28  | 11  |
| GAGCGGTTTT                                                                                                                            | GAGCGGTCTTG                                                                                    |   |         |         |      |     |     |
| Cele.WB235                                                                                                                            | Cele.WB235_6:8602386                                                                           | 6 | 8602386 | 8602451 | 66   | 5   | 11  |
| GCAAAAAATG                                                                                                                            | GCAAAAAATGT                                                                                    |   |         |         |      |     |     |
| Cele.WB235                                                                                                                            | Cele.WB235_6:9007305                                                                           | 6 | 9007305 | 9007574 | 270  | 10  | 11  |
| GTACTGTAGG                                                                                                                            | GTACTGTAGTA                                                                                    |   |         |         |      |     |     |
| Cele.WB235                                                                                                                            | Cele.WB235_6:9007668                                                                           | 6 | 9007668 | 9008148 | 481  | 12  | 40  |
| CTTCTGAAAA                                                                                                                            | CTTCTGAAAAATCCGAGAAAATCTGGAATGTTCCAGAAC                                                        |   |         |         |      |     |     |

|                 |                                                                                                              |   |          |          |      |     |     |
|-----------------|--------------------------------------------------------------------------------------------------------------|---|----------|----------|------|-----|-----|
| Cele.WB235      | Cele.WB235_6:9008356                                                                                         | 6 | 9008356  | 9008996  | 641  | 20  | 32  |
| CGGGAATTCA      | CGGGAATTCAAAATTTCTGTGAAAATTTTAG                                                                              |   |          |          |      |     |     |
| Cele.WB235      | Cele.WB235_6:9184992                                                                                         | 6 | 9184992  | 9188750  | 3759 | 150 | 25  |
| CAGAGAGTAA      | CAGAGAGTAAACTATACTGTGAAGC                                                                                    |   |          |          |      |     |     |
| Cele.WB235      | Cele.WB235_6:9188817                                                                                         | 6 | 9188817  | 9189060  | 244  | 7   | 35  |
| AAAATTTGAA      | AAAATTTGAAATTTCCCGCCAAAATATTTTCTACTG                                                                         |   |          |          |      |     |     |
| Cele.WB235      | Cele.WB235_6:9605306                                                                                         | 6 | 9605306  | 9607639  | 2334 | 65  | 32  |
| TCCCGCCAAA      | TCACGCCAAAAATTTTCAAAGAAAATTTGAAT                                                                             |   |          |          |      |     |     |
| Cele.WB235      | Cele.WB235_6:9607653                                                                                         | 6 | 9607653  | 9607728  | 76   | 5   | 15  |
| ATGGGTCTCG      | ATGGGTCTCGCCACG                                                                                              |   |          |          |      |     |     |
| Cele.WB235      | Cele.WB235_6:10360970                                                                                        | 6 | 10360970 | 10361186 | 217  | 4   | 25  |
| ATTGGCAGAA      | ATTGGCAGAACATTAGAGTAAATAT                                                                                    |   |          |          |      |     |     |
| Cele.WB235      | Cele.WB235_6:10361494                                                                                        | 6 | 10361494 | 10369166 | 7673 | 299 | 25  |
| GTGAAGCCAG      | GTGAAGCCAGAGAGTAAAAAATATG                                                                                    |   |          |          |      |     |     |
| Cele.WB235      | Cele.WB235_6:10369202                                                                                        | 6 | 10369202 | 10370313 | 1112 | 99  | 11  |
| TGGAGCGGTT      | TGGAGCGGTAT                                                                                                  |   |          |          |      |     |     |
| Cele.WB235      | Cele.WB235_6:10973510                                                                                        | 6 | 10973510 | 10974510 | 1001 | 30  | 27  |
| CACTGACCAA      | CACTGACCAAAAAAATATTATACTTG                                                                                   |   |          |          |      |     |     |
| Cele.WB235      | Cele.WB235_6:11260441                                                                                        | 6 | 11260441 | 11260545 | 105  | 4   | 26  |
| AAATTAATCT      | AAATTAATCTGTCACTCTAACTTTTA                                                                                   |   |          |          |      |     |     |
| Cele.WB235      | Cele.WB235_6:11440976                                                                                        | 6 | 11440976 | 11441039 | 64   | 4   | 14  |
| CTATACGCTA      | CTATACGCTATACG                                                                                               |   |          |          |      |     |     |
| Cele.WB235      | Cele.WB235_6:11441051                                                                                        | 6 | 11441051 | 11442751 | 1701 | 68  | 25  |
| CCGTAATGCC      | CCGTAATGCCTAACTTTAGAATCTG                                                                                    |   |          |          |      |     |     |
| Cele.WB235      | Cele.WB235_6:11442777                                                                                        | 6 | 11442777 | 11443790 | 1014 | 39  | 26  |
| CGGCGGATTT      | CGGCGGATTTTAGAAAAATGACATTG                                                                                   |   |          |          |      |     |     |
| Cele.WB235      | Cele.WB235_6:11489369                                                                                        | 6 | 11489369 | 11489615 | 247  | 7   | 11  |
| TCCTACAGTA      | TCCTACCGTAA                                                                                                  |   |          |          |      |     |     |
| Cele.WB235      | Cele.WB235_6:11688529                                                                                        | 6 | 11688529 | 11688958 | 430  | 4   | 108 |
| TTTCACGTTT      | TTTCACGTTTTACGGTGATTATATAGGTCACGAACTAATTTATTTTGAAAATTGACCTGTGGACCTATAAATTTGGAGATATGGTAAATTGAGTATGGGCTTTTAGAT |   |          |          |      |     |     |
| Cele.WB235      | Cele.WB235_6:11745151                                                                                        | 6 | 11745151 | 11745371 | 221  | 10  | 22  |
| TCAGTGCAAA      | TCAGTGCAAAGTGACAATTATG                                                                                       |   |          |          |      |     |     |
| Cele.WB235      | Cele.WB235_6:11785744                                                                                        | 6 | 11785744 | 11787512 | 1769 | 68  | 26  |
| ACCATTACAC      | ACCATTACCTAAAAATATGACTCTA                                                                                    |   |          |          |      |     |     |
| Cele.WB235      | Cele.WB235_6:11787527                                                                                        | 6 | 11787527 | 11789550 | 2024 | 75  | 26  |
| AAAGTTAGAC      | AAAGTTAGACCATTAGATGAATTTAT                                                                                   |   |          |          |      |     |     |
| Cele.WB235      | Cele.WB235_6:11789572                                                                                        | 6 | 11789572 | 11789748 | 177  | 16  | 11  |
| CGAAGTTGTC      | CAAAGTTGTCA                                                                                                  |   |          |          |      |     |     |
| Cele.WB235      | Cele.WB235_6:11859496                                                                                        | 6 | 11859496 | 11859817 | 322  | 5   | 18  |
| TGCAATACTA      | TGCAATACTAATAGGGAG                                                                                           |   |          |          |      |     |     |
| Cele.WB235      | Cele.WB235_6:11886530                                                                                        | 6 | 11886530 | 11888254 | 1725 | 68  | 25  |
| TTCACCATAT      | TTCACCATATATTTTACTCTCTGGC                                                                                    |   |          |          |      |     |     |
| Cele.WB235      | Cele.WB235_6:11888285                                                                                        | 6 | 11888285 | 11889641 | 1357 | 6   | 226 |
| TGTACTATTT      |                                                                                                              |   |          |          |      |     |     |
| TGTACTATTTCTGTA | ACTACGTGAAGCTTCTTGTA                                                                                         |   |          |          |      |     |     |
| CTACTACTAAAA    | ATATTTGTTGGTATATTTCAAAAAGAACTTAAAAATTTACTACAAAGTTTCTGAAAGACATTTCAAAAAAGTTACTTTGAAGAGATTTATG                  |   |          |          |      |     |     |
| AATTTTCAAA      | GTACGAAAATCCATCTATTTTTGCCTATAAAATGGTAGTTTTCATTAAATAATAAAATACGCCTAAAAAGGTAGGGCTGAAAA                          |   |          |          |      |     |     |
| Cele.WB235      | Cele.WB235_6:12276123                                                                                        | 6 | 12276123 | 12276239 | 117  | 6   | 19  |
| ATAGATTGTT      | ATAGATTGTTACAGAAAA                                                                                           |   |          |          |      |     |     |
| Cele.WB235      | Cele.WB235_6:12276852                                                                                        | 6 | 12276852 | 12278772 | 1921 | 55  | 32  |
| GGTGCTATTT      | GGTGCTATTTGGTGCTCCATCGGTGCTACATC                                                                             |   |          |          |      |     |     |
| Cele.WB235      | Cele.WB235_6:12502706                                                                                        | 6 | 12502706 | 12502822 | 117  | 6   | 19  |
| AAAAATAGAT      | AAAAATAGATTGTTACACG                                                                                          |   |          |          |      |     |     |

|            |                       |   |          |          |      |     |     |
|------------|-----------------------|---|----------|----------|------|-----|-----|
| Cele.WB235 | Cele.WB235_6:12521171 | 6 | 12521171 | 12522034 | 864  | 10  | 15  |
| GGGTCTCACC | GGGTCTCACC            |   |          |          |      |     |     |
| Cele.WB235 | Cele.WB235_6:12578040 | 6 | 12578040 | 12578842 | 803  | 12  | 32  |
| CGACCTAGGT | CGACCTAGGT            |   |          |          |      |     |     |
| Cele.WB235 | Cele.WB235_6:12606642 | 6 | 12606642 | 12606920 | 279  | 9   | 31  |
| TCGACAGAAG | TCGACAGAAG            |   |          |          |      |     |     |
| Cele.WB235 | Cele.WB235_6:12607668 | 6 | 12607668 | 12607975 | 308  | 5   | 26  |
| AAAAATGGCA | AAAAATGGCA            |   |          |          |      |     |     |
| Cele.WB235 | Cele.WB235_6:13242451 | 6 | 13242451 | 13244463 | 2013 | 18  | 108 |
| TTTCAGATTT | TTTCAGATTT            |   |          |          |      |     |     |
| Cele.WB235 | Cele.WB235_6:13423594 | 6 | 13423594 | 13423926 | 333  | 8   | 18  |
| TGCAAGACTA | TGCAAGACTA            |   |          |          |      |     |     |
| Cele.WB235 | Cele.WB235_6:13560726 | 6 | 13560726 | 13560906 | 181  | 11  | 15  |
| TCGTGGTGAG | TCGTGGTGAG            |   |          |          |      |     |     |
| Cele.WB235 | Cele.WB235_6:13684248 | 6 | 13684248 | 13684998 | 751  | 7   | 108 |
| TGGGTAATCA | TGGGTAATCA            |   |          |          |      |     |     |
| Cele.WB235 | Cele.WB235_6:13775030 | 6 | 13775030 | 13775085 | 56   | 5   | 11  |
| GTGCTTGGTC | GTGCTTGGTC            |   |          |          |      |     |     |
| Cele.WB235 | Cele.WB235_6:13795118 | 6 | 13795118 | 13795677 | 560  | 14  | 40  |
| GAACATTCCA | GAACATTCCA            |   |          |          |      |     |     |
| Cele.WB235 | Cele.WB235_6:13795780 | 6 | 13795780 | 13795990 | 211  | 6   | 35  |
| CAGAAAATTT | CAGAAAATTT            |   |          |          |      |     |     |
| Cele.WB235 | Cele.WB235_6:13795118 | 6 | 13795118 | 13796907 | 1790 | 19  | 40  |
| GAACATTCCA | GAACATTCCA            |   |          |          |      |     |     |
| Cele.WB235 | Cele.WB235_6:13797037 | 6 | 13797037 | 13797540 | 504  | 19  | 11  |
| CTACAGTACT | CTACAGTACT            |   |          |          |      |     |     |
| Cele.WB235 | Cele.WB235_6:13923839 | 6 | 13923839 | 13924439 | 601  | 4   | 153 |
| TGAGGTGCAG | TGAGGTGCAG            |   |          |          |      |     |     |
| TGAGGTGCAG | TGAGGTGCAG            |   |          |          |      |     |     |
| TTTCCTGCAG | TTTCCTGCAG            |   |          |          |      |     |     |
| Cele.WB235 | Cele.WB235_6:13981254 | 6 | 13981254 | 13981504 | 251  | 10  | 25  |
| TCTCTGGCTT | TCTCTGGCTT            |   |          |          |      |     |     |
| Cele.WB235 | Cele.WB235_6:14119472 | 6 | 14119472 | 14121076 | 1605 | 43  | 37  |
| TTTAATTTTT | TTTAATTTTT            |   |          |          |      |     |     |
| Cele.WB235 | Cele.WB235_6:14121147 | 6 | 14121147 | 14122257 | 1111 | 73  | 15  |
| TCGTGGTGAG | TCGTGGTGAG            |   |          |          |      |     |     |
| Cele.WB235 | Cele.WB235_6:14126276 | 6 | 14126276 | 14126426 | 151  | 12  | 12  |
| ATAGGCATAG | ATAGGCATAG            |   |          |          |      |     |     |
| Cele.WB235 | Cele.WB235_6:14154417 | 6 | 14154417 | 14154672 | 256  | 13  | 20  |
| TAACAATCTA | TAACAATCTA            |   |          |          |      |     |     |
| Cele.WB235 | Cele.WB235_6:14262861 | 6 | 14262861 | 14263101 | 241  | 5   | 48  |
| GGAGGTGGAG | GGAGGTGGAG            |   |          |          |      |     |     |
| Cele.WB235 | Cele.WB235_6:14323895 | 6 | 14323895 | 14325001 | 1107 | 10  | 18  |
| TGCAAGACTA | TGCAAGACTA            |   |          |          |      |     |     |
| Cele.WB235 | Cele.WB235_6:14362236 | 6 | 14362236 | 14362311 | 76   | 5   | 15  |
| TCGTGGCGAG | TCGTGGCGAG            |   |          |          |      |     |     |
| Cele.WB235 | Cele.WB235_6:14384735 | 6 | 14384735 | 14389919 | 5185 | 108 | 48  |
| AAATTACGGG | AAATTACGGG            |   |          |          |      |     |     |
| Cele.WB235 | Cele.WB235_6:14638909 | 6 | 14638909 | 14639063 | 155  | 5   | 22  |
| TTTGTGGGAG | TTTGTGGGAG            |   |          |          |      |     |     |
| Cele.WB235 | Cele.WB235_6:14723633 | 6 | 14723633 | 14724049 | 417  | 13  | 32  |
| TTGAATTC   | TTGAATTC              |   |          |          |      |     |     |

|                                                                                                                                      |                                                                                                                                    |   |          |          |      |     |     |
|--------------------------------------------------------------------------------------------------------------------------------------|------------------------------------------------------------------------------------------------------------------------------------|---|----------|----------|------|-----|-----|
| Cele.WB235                                                                                                                           | Cele.WB235_6:14723638                                                                                                              | 6 | 14723638 | 14724190 | 553  | 16  | 32  |
| TTCCCGCCAA                                                                                                                           | TTCCCGCCAAAATTTTTCACAGAAAATTTGAA                                                                                                   |   |          |          |      |     |     |
| Cele.WB235                                                                                                                           | Cele.WB235_6:14723559                                                                                                              | 6 | 14723559 | 14724409 | 851  | 5   | 40  |
| TTCTGGAACA                                                                                                                           | TTCTGGAACATTCAGCATTTTCTCAAGTTTCCAGAAGG                                                                                             |   |          |          |      |     |     |
| Cele.WB235                                                                                                                           | Cele.WB235_6:14724532                                                                                                              | 6 | 14724532 | 14724801 | 270  | 10  | 11  |
| CCTACAGTAC                                                                                                                           | CTACAGTACAA                                                                                                                        |   |          |          |      |     |     |
| Cele.WB235                                                                                                                           | Cele.WB235_6:14908166                                                                                                              | 6 | 14908166 | 14909416 | 1251 | 49  | 25  |
| TGGCTTCACA                                                                                                                           | TGGCTTCACAGTCTAATTTACTCTC                                                                                                          |   |          |          |      |     |     |
| Cele.WB235                                                                                                                           | Cele.WB235_6:14937379                                                                                                              | 6 | 14937379 | 14937623 | 245  | 7   | 35  |
| CAGAAAATTT                                                                                                                           | CAGAAAATTTAAATTTCCCGCCAAAATATTTTCT                                                                                                 |   |          |          |      |     |     |
| Cele.WB235                                                                                                                           | Cele.WB235_6:15051665                                                                                                              | 6 | 15051665 | 15051975 | 311  | 5   | 72  |
| TGGTTGTGTT                                                                                                                           | TGGTTGTGTTCCCAAAAGTGAGAAAAGAGGGTACAGACCTCTGTACGAATATGTCTTATCAGCTTCAAAGA                                                            |   |          |          |      |     |     |
| Cele.WB235                                                                                                                           | Cele.WB235_6:15226880                                                                                                              | 6 | 15226880 | 15229061 | 2182 | 20  | 108 |
| AAGTCTTCTT                                                                                                                           | AAGTCTTCTTGGTTCTGTGTCTTTGTCTCGAAATGTTGACCATCTCCTTGCGAGATCTTATTGTGAGATGGAACCTTCTTGGCATACCTCTCTCCACTGATGTGAGTG                       |   |          |          |      |     |     |
| Cele.WB235                                                                                                                           | Cele.WB235_6:15295722                                                                                                              | 6 | 15295722 | 15295953 | 232  | 11  | 21  |
| TGAAAGATTG                                                                                                                           | TGAAAGATTGGTTCAGTGTCTA                                                                                                             |   |          |          |      |     |     |
| Cele.WB235                                                                                                                           | Cele.WB235_6:15470071                                                                                                              | 6 | 15470071 | 15470810 | 740  | 22  | 10  |
| TATCTAGATC                                                                                                                           | TATCTATATC                                                                                                                         |   |          |          |      |     |     |
| Cele.WB235                                                                                                                           | Cele.WB235_6:15482252                                                                                                              | 6 | 15482252 | 15482427 | 176  | 5   | 35  |
| ATTTAAATTT                                                                                                                           | ATTTAAATTTCCCGCCAAAATATTTTTCACAGAAC                                                                                                |   |          |          |      |     |     |
| Cele.WB235                                                                                                                           | Cele.WB235_6:15482468                                                                                                              | 6 | 15482468 | 15483998 | 1531 | 97  | 15  |
| GTCTCACCAC                                                                                                                           | GTCTCACC CGAAGG                                                                                                                    |   |          |          |      |     |     |
| Cele.WB235                                                                                                                           | Cele.WB235_6:15507328                                                                                                              | 6 | 15507328 | 15507477 | 150  | 4   | 21  |
| TGTCCGTGAT                                                                                                                           | TGTCCGTGATGATCGTGAGCA                                                                                                              |   |          |          |      |     |     |
| Cele.WB235                                                                                                                           | Cele.WB235_6:15597064                                                                                                              | 6 | 15597064 | 15597272 | 209  | 8   | 26  |
| GGTCTAACTT                                                                                                                           | GGTCTAACTTTATAAATGGATCTGAT                                                                                                         |   |          |          |      |     |     |
| Cele.WB235                                                                                                                           | Cele.WB235_6:15635133                                                                                                              | 6 | 15635133 | 15635373 | 241  | 6   | 40  |
| AAAGTTCTGG                                                                                                                           | AAAGTTCTGGAACATTCCAGACTTTTCCCAATTTTCTAG                                                                                            |   |          |          |      |     |     |
| Cele.WB235                                                                                                                           | Cele.WB235_6:15635446                                                                                                              | 6 | 15635446 | 15635796 | 351  | 10  | 35  |
| CAGAAAATTT                                                                                                                           | CAGAAAATTTAAATTTCCCTCCAACTTTTTTCT                                                                                                  |   |          |          |      |     |     |
| Cele.WB235                                                                                                                           | Cele.WB235_6:15635841                                                                                                              | 6 | 15635841 | 15636081 | 241  | 15  | 15  |
| GGGTCTCACC                                                                                                                           | GGGTCTCACCACGAT                                                                                                                    |   |          |          |      |     |     |
| Cele.WB235                                                                                                                           | Cele.WB235_6:15687867                                                                                                              | 6 | 15687867 | 15688727 | 861  | 33  | 26  |
| AATTCATCTA                                                                                                                           | AATTCATCTAGTGGTCTAACTTTGGA                                                                                                         |   |          |          |      |     |     |
| Cele.WB235                                                                                                                           | Cele.WB235_6:15738820                                                                                                              | 6 | 15738820 | 15738988 | 169  | 8   | 21  |
| GGCTGCCGAG                                                                                                                           | GGCTGCCGAGGGTAAGCTAGG                                                                                                              |   |          |          |      |     |     |
| Cele.WB235                                                                                                                           | Cele.WB235_6:15806999                                                                                                              | 6 | 15806999 | 15807439 | 441  | 22  | 20  |
| CATACCAAAA                                                                                                                           | CATACCAAAAAACAGATTGG                                                                                                               |   |          |          |      |     |     |
| Cele.WB235                                                                                                                           | Cele.WB235_6:15807460                                                                                                              | 6 | 15807460 | 15811152 | 3693 | 142 | 26  |
| GTGAACGGCC                                                                                                                           | GTGAACGGCCAGAGTCACATAAATTTG                                                                                                        |   |          |          |      |     |     |
| Cele.WB235                                                                                                                           | Cele.WB235_6:15811201                                                                                                              | 6 | 15811201 | 15811280 | 80   | 4   | 20  |
| TAACAATCTA                                                                                                                           | TAACAATCTATTTTTTTCGTG                                                                                                              |   |          |          |      |     |     |
| Cele.WB235                                                                                                                           | Cele.WB235_6:15929033                                                                                                              | 6 | 15929033 | 15929676 | 644  | 4   | 158 |
| TATCAATTTT                                                                                                                           | TATCAATTTTCAGACGCGCTACGGGGGTTTTTGTCTTGAATTTCAATTTCAACAGGCGCAAAAAACAAAAATAAAATTTTGGATTTTGGAAAAGTTTTTATAGATTTGTATTCTAGATTGTTTAAAAATA |   |          |          |      |     |     |
| TTATTGGTACGTTTTTGGACCTATA                                                                                                            |                                                                                                                                    |   |          |          |      |     |     |
| Cele.WB235                                                                                                                           | Cele.WB235_6:15929110                                                                                                              | 6 | 15929110 | 15929778 | 669  | 4   | 158 |
| CAAAAAATAAA                                                                                                                          |                                                                                                                                    |   |          |          |      |     |     |
| CAAAAAATAAAATTTTGGATTTTGGAAAAGTTTTTATAGATTTGTATTCTAGATTGTTTAAAAATATTATTGGTACGTTTTTGGACCTATATATCAATTTTCAGACGCGCTACGGGGGTTTTTGTCTTGAAT |                                                                                                                                    |   |          |          |      |     |     |
| TCCAATTTCAACAGGCGCAAAAAA                                                                                                             |                                                                                                                                    |   |          |          |      |     |     |
| Cele.WB235                                                                                                                           | Cele.WB235_6:16050430                                                                                                              | 6 | 16050430 | 16050549 | 120  | 6   | 20  |
| CCACCCTGTA                                                                                                                           | CCACCCTGTAATATCATGGA                                                                                                               |   |          |          |      |     |     |

|            |                                                                              |   |          |          |      |     |    |
|------------|------------------------------------------------------------------------------|---|----------|----------|------|-----|----|
| Cele.WB235 | Cele.WB235_6:16100349                                                        | 6 | 16100349 | 16100596 | 248  | 8   | 11 |
| GTACTGTAGG | GTACTGTAGTA                                                                  |   |          |          |      |     |    |
| Cele.WB235 | Cele.WB235_6:16100682                                                        | 6 | 16100682 | 16101122 | 441  | 11  | 40 |
| TCCAGAACCT | TCCAGAACCTTCTGGAAAATCCGAGAAAATTCTGGAATGT                                     |   |          |          |      |     |    |
| Cele.WB235 | Cele.WB235_6:16100718                                                        | 6 | 16100718 | 16101792 | 1075 | 13  | 40 |
| ATGTTCCAGA | ATGTTCCAGAACCTTCTGGAAAATTTGAGAAAATGCTGGA                                     |   |          |          |      |     |    |
| Cele.WB235 | Cele.WB235_6:16135006                                                        | 6 | 16135006 | 16135334 | 329  | 5   | 18 |
| ATTAGTTTTG | ATTAGTTTTGCACTCTCT                                                           |   |          |          |      |     |    |
| Cele.WB235 | Cele.WB235_6:16158526                                                        | 6 | 16158526 | 16158670 | 145  | 9   | 14 |
| TACCATATAC | TACCAAATACCATA                                                               |   |          |          |      |     |    |
| Cele.WB235 | Cele.WB235_6:16199460                                                        | 6 | 16199460 | 16199628 | 169  | 12  | 14 |
| CTTAGGGCTT | CTTAGGGCTTCAGG                                                               |   |          |          |      |     |    |
| Cele.WB235 | Cele.WB235_6:16286380                                                        | 6 | 16286380 | 16286520 | 141  | 7   | 20 |
| TACAGGGTGG | TACAGGGTGGCCCATTA                                                            |   |          |          |      |     |    |
| Cele.WB235 | Cele.WB235_6:16372783                                                        | 6 | 16372783 | 16373033 | 251  | 11  | 16 |
| TTCCGGCAAT | TTCCGGCAATCGGCTA                                                             |   |          |          |      |     |    |
| Cele.WB235 | Cele.WB235_6:16505118                                                        | 6 | 16505118 | 16505433 | 316  | 18  | 15 |
| TCACCACGAA | TCACCACGAAGGGTC                                                              |   |          |          |      |     |    |
| Cele.WB235 | Cele.WB235_6:16758347                                                        | 6 | 16758347 | 16761606 | 3260 | 43  | 76 |
| AGCATTAGAG | AGCATTAGAGCATGTACACAGACACCGACAACACCACAGTCTCTCCCACTTACCTTCGTGCAAAGGAGTGTCTTCT |   |          |          |      |     |    |
| Cele.WB235 | Cele.WB235_6:16837630                                                        | 6 | 16837630 | 16838124 | 495  | 4   | 52 |
| GCATGTCTTC | GCATGTCTTCCAGGCAGAGAATCGCTCTCCTAGGTTTCCAAAAACAGTCTA                          |   |          |          |      |     |    |
| Cele.WB235 | Cele.WB235_6:16851316                                                        | 6 | 16851316 | 16851756 | 441  | 13  | 40 |
| TTTCTAGAAA | TTTCTAGAAAGTTCTGGAATATTCCAGAATTTTCCCGAAT                                     |   |          |          |      |     |    |
| Cele.WB235 | Cele.WB235_6:16852072                                                        | 6 | 16852072 | 16852162 | 91   | 6   | 15 |
| GGGTCTCACC | GGGTCTCACC CGCAA                                                             |   |          |          |      |     |    |
| Cele.WB235 | Cele.WB235_6:16884509                                                        | 6 | 16884509 | 16885875 | 1367 | 37  | 10 |
| TGGATCGGGA | TGGATCGGGA                                                                   |   |          |          |      |     |    |
| Cele.WB235 | Cele.WB235_6:16886473                                                        | 6 | 16886473 | 16886932 | 460  | 20  | 14 |
| ATAGCGCATA | ATAGCGCATAGCGC                                                               |   |          |          |      |     |    |
| Cele.WB235 | Cele.WB235_6:17087637                                                        | 6 | 17087637 | 17087742 | 106  | 5   | 21 |
| GGTGGACCCA | GGTGGACCCACGGGTTCTAT                                                         |   |          |          |      |     |    |
| Cele.WB235 | Cele.WB235_6:17125270                                                        | 6 | 17125270 | 17125459 | 190  | 5   | 38 |
| CCGTTTCGCC | CCGTTTCGCCCTTGAGCGATTCACCGCTTAAATGGGCCTC                                     |   |          |          |      |     |    |
| Cele.WB235 | Cele.WB235_6:17179152                                                        | 6 | 17179152 | 17179971 | 820  | 21  | 39 |
| ATTGATACTT | ATTGATACTTTGTCTGGGTTTAGATCATCGCCGAGCTTC                                      |   |          |          |      |     |    |
| Cele.WB235 | Cele.WB235_6:17288074                                                        | 6 | 17288074 | 17288675 | 602  | 6   | 40 |
| TTTCTCGAAT | TTTCTCGAATTTTCCAGAAGGTTCTAGAACATTCAGAAA                                      |   |          |          |      |     |    |
| Cele.WB235 | Cele.WB235_6:17311002                                                        | 6 | 17311002 | 17311107 | 106  | 7   | 15 |
| GAGACCCATC | GAGACCCATCATGGC                                                              |   |          |          |      |     |    |
| Cele.WB235 | Cele.WB235_6:17311164                                                        | 6 | 17311164 | 17311479 | 316  | 9   | 35 |
| AAATTTTCTG | AAATTTTCTGTGAAAAATATTTTGGCGGGAAATTT                                          |   |          |          |      |     |    |
| Cele.WB235 | Cele.WB235_6:17310825                                                        | 6 | 17310825 | 17311809 | 985  | 10  | 40 |
| AATGTTCCAG | AATGTTCCAGAACCTTCTGGGAATTTCTGGAAAAATCTAG                                     |   |          |          |      |     |    |
| Cele.WB235 | Cele.WB235_6:17344107                                                        | 6 | 17344107 | 17344254 | 148  | 8   | 15 |
| GGGGGCAACA | GGGGGCAACAAATTA                                                              |   |          |          |      |     |    |
| Cele.WB235 | Cele.WB235_6:17441768                                                        | 6 | 17441768 | 17447783 | 6016 | 134 | 45 |
| CCACCAGCAC | CCACCAGCACTGCTTCGAGTACGACAGAGAGCACTTCGACTCCAT                                |   |          |          |      |     |    |
| Cele.WB235 | Cele.WB235_6:17674798                                                        | 6 | 17674798 | 17675174 | 377  | 7   | 36 |
| CCACCAACTC | CCACCAACACCAAAATCAGCTGCTCCATCAGAGGTT                                         |   |          |          |      |     |    |
| Cele.WB235 | Cele.WB235_6:17718013                                                        | 6 | 17718013 | 17718930 | 918  | 12  | 12 |
| TTAGGCTTAG | TCAGGCTTAGGC                                                                 |   |          |          |      |     |    |
