# Supplementary material for: Unique Features of Satellite DNA Transcription in Different Tissues of Caenorhabditis elegans
Source: MDPI journal article supplement (doi:10.3390/ijms24032970), 2023-02-03
Supplement: s1 [file s1]

```

*****
The program is running under the following parameters:
Output:
  Prefix of the family name WB235
  Columns for the name: 150
  Cluster with more than 0 sequences are printed
  File with the table:
/home/peypoch/disk1/bioinformatica/sra/nemapodes/WB235/WB235.fa.1-0-0-4-
800-10-1-60-2-0-0-2-0-1-2.sat.fa.0-1-1-1-1-1-0.6-0-1-150-1.fam.t
  File with families in format fasta:
/home/peypoch/disk1/bioinformatica/sra/nemapodes/WB235/WB235.fa.1-0-0-4-
800-10-1-60-2-0-0-2-0-1-2.sat.fa.0-1-1-1-1-1-0.6-0-1-150-1.fam.fa
  Alphabet 0 (size 5) (0:dna bases, 1 aminoacids, 2 codons)
  Length of the mer 1
  Circular permutations are allowed
  Reverse sequencess are considerd.
  Sequences are aligned while similarity : 0.600000
  Alignment score: Normalized respect to the length and number of
sequences.
  Alignment parameters:
    opening gap: -3.000000
    extensio gap: -1.000000
    extreme gaph: -0.500000
  Consensus type: without gap columns
  Similarity matrix file:
/home/peypoch/disk1/bioinformatica/malig/darreraversio/score_matrix.3.-1
  Multifasta file:
/home/peypoch/disk1/bioinformatica/sra/nemapodes/WB235/WB235.fa.1-0-0-4-
800-10-1-60-2-0-0-2-0-1-2.sat.fa

```

```

*****
Number of sequences=3978
There are 402 alignments:

>WB235_Fam_1_35_172 Nr. of seq. 172 Alignment length(with gaps) = 44
Alignment score = 0.653800
WB235_2:11660023-11660287 Satlength=265 Nr of Repeats=8 RepeatLength=33
seed=AATTGAAAAT Num.seqs=8 Similarity=0.834055
0 AATT--G--AA-AA---TCCGGCAAATGGGC-AAATTGCCG-G-
WB235_1:3835938-3837024 Satlength=1087 Nr of Repeats=26 RepeatLength=34
seed=TGCCGGAATT Num.seqs=16 Similarity=0.878105
28 AATT--G--AA--A-TTTCCAGCAAATCGGC-AAATTGCCG-G-
WB235_2:5627848-5628154 Satlength=307 Nr of Repeats=9 RepeatLength=34
seed=GGAATTGAAA Num.seqs=9 Similarity=0.831481
32 AATT--G--AA--A-TTTCCGGCAAATCGGC-AAATTGCCG-G-
Rev.of_WB235_2:15188581-15189224 Satlength=644 Nr of Repeats=18
RepeatLength=34 seed=TTTCAATTCC Num.seqs=12 Similarity=0.906120
42 AATT--G--AA--A-TTTCCGGCAAATCGGC-AAATTGCCG-G-
Rev.of_WB235_3:11495534-11496085 Satlength=552 Nr of Repeats=15
RepeatLength=34 seed=AAATTTCAAT Num.seqs=10 Similarity=0.841394
45 AATT--G--AA--A-TTTCCGGCAAATCGGC-AAATTGCCG-G-

```

WB235\_3:13095846-13096595 Satlength=750 Nr of Repeats=22 RepeatLength=34  
seed=AAATCGGCAA Num.seqs=21 Similarity=0.849300  
50 AATT--G--AA--A-TTTCGGCAAATCGGC-AAATTGCCG-G-  
WB235\_3:13099929-13100574 Satlength=646 Nr of Repeats=18 RepeatLength=34  
seed=CGGAATTGAA Num.seqs=15 Similarity=0.854715  
65 AATT--G--AA--A-TTTCGGCAAATCGGC-AAATTGCCG-G-  
Rev.of\_WB235\_3:12584489-12584865 Satlength=377 Nr of Repeats=11  
RepeatLength=34 seed=TTTCAATTCC Num.seqs=7 Similarity=0.788982  
42 AATT--G--AA--A-TTTCGGTAAATCGGC-AAATTGCCG-G-  
Rev.of\_WB235\_1:14772871-14773518 Satlength=648 Nr of Repeats=19  
RepeatLength=34 seed=CGGAAATTTTC Num.seqs=18 Similarity=0.965142  
48 AATT--G--AA--A-TTTCGGCAAATCGGC-AAATTGCTG-G-  
WB235\_2:14870141-14870668 Satlength=528 Nr of Repeats=13 RepeatLength=35  
seed=TTTCCGGCAA Num.seqs=8 Similarity=0.791837  
77 AATT--GA-AA--A-TTTCGGCAAATCGGC-AAATTGCTG-G-  
Rev.of\_WB235\_4:382116-382388 Satlength=273 Nr of Repeats=8  
RepeatLength=34 seed=TTGCAGGAAA Num.seqs=8 Similarity=0.823529  
52 AATT--G--AA--A-TTTCCTGCAAACCGGC-AAATTGCCG-G-  
Rev.of\_WB235\_5:775516-775721 Satlength=206 Nr of Repeats=6  
RepeatLength=34 seed=CAATTTGCCG Num.seqs=5 Similarity=0.788235  
64 AATT--G--AA--A-TTTCGGCAAACCGGC-AAATTGCCG-A-  
Rev.of\_WB235\_2:13037761-13037897 Satlength=137 Nr of Repeats=4  
RepeatLength=34 seed=TTCAATTCCG Num.seqs=4 Similarity=0.803922  
41 AATT--G--AA--A-TTTCGGCAAATCGAC-GAATTGCCG-G-  
WB235\_1:11061949-11062380 Satlength=432 Nr of Repeats=11 RepeatLength=34  
seed=TTCCGGCAAA Num.seqs=9 Similarity=0.844227  
43 AATT--T--AA--A-TTTCGGCAAATCGGA-AAATTGCCG-G-  
Rev.of\_WB235\_4:3004801-3005510 Satlength=710 Nr of Repeats=20  
RepeatLength=34 seed=CCGATTTGCC Num.seqs=12 Similarity=0.843731  
57 AGTT--G--AA--A-TTTCGGCAAATCGGT-AAATTGCCG-G-  
WB235\_3:12531237-12531912 Satlength=676 Nr of Repeats=18 RepeatLength=35  
seed=TTCCGGCAA Num.seqs=13 Similarity=0.878877  
77 AATT--G--AAC-A-TTTCGGCAAATCGGT-AAATTGCCG-G-  
Rev.of\_WB235\_1:1012604-1013479 Satlength=876 Nr of Repeats=25  
RepeatLength=35 seed=ATTTTCAATT Num.seqs=25 Similarity=0.921397  
44 AATT--G--AA-AA-TTTCGGCAAATCGGC-AACTGCCG-G-  
WB235\_1:1564845-1565136 Satlength=292 Nr of Repeats=7 RepeatLength=35  
seed=CGGCAAATCG Num.seqs=6 Similarity=0.895873  
47 AATT--G--AA-AA-TTTCGGCAAATCGGC-AAATTGCCG-G-  
Rev.of\_WB235\_1:1605584-1606132 Satlength=549 Nr of Repeats=6  
RepeatLength=35 seed=AAATTTTCAA Num.seqs=5 Similarity=0.878095  
81 AATT--G--AA-AA-TTTCGGCAAATCGGC-AAATTGCCG-G-  
Rev.of\_WB235\_1:1946493-1947006 Satlength=514 Nr of Repeats=5  
RepeatLength=35 seed=TTTGCCGGAA Num.seqs=3 Similarity=0.759259  
54 AATT--G--AA-AA-TTTCGGCAAATCGGC-AAATTGCCG-G-  
WB235\_1:2809445-2809654 Satlength=210 Nr of Repeats=5 RepeatLength=35  
seed=GGAATTGAAA Num.seqs=3 Similarity=0.898413  
67 AATT--G--AA-AA-TTTCGGCAAATCGGC-AAATTGCCG-G-  
Rev.of\_WB235\_1:10977031-10977503 Satlength=473 Nr of Repeats=10  
RepeatLength=35 seed=TTGCCGATTT Num.seqs=6 Similarity=0.702469  
61 AATT--G--AA-AA-TTTCGGCAAATCGGC-AAATTGCCG-G-  
Rev.of\_WB235\_2:12770724-12771186 Satlength=463 Nr of Repeats=10  
RepeatLength=35 seed=TCAATTCGG Num.seqs=9 Similarity=0.876190  
75 AATT--G--AA-AA-TTTCGGCAAATCGGC-AAATTGCCG-G-

Rev.of\_WB235\_2:13394857-13395660 Satlength=804 Nr of Repeats=20  
 RepeatLength=35 seed=GATTTGCCGG Num.seqs=15 Similarity=0.816490  
 56 AATT--G--AA-AA-TTTCGGCAAATCGGC-AAATTGCCG-G-  
 WB235\_2:14239112-14239812 Satlength=701 Nr of Repeats=18 RepeatLength=35  
 seed=GCAAATCGGC Num.seqs=14 Similarity=0.835060  
 49 AATT--G--AA-AA-TTTCGGCAAATCGGC-AAATTGCCG-G-  
 Rev.of\_WB235\_2:15111116-15111396 Satlength=281 Nr of Repeats=8  
 RepeatLength=35 seed=TTTGCCGGAA Num.seqs=8 Similarity=0.858503  
 54 AATT--G--AA-AA-TTTCGGCAAATCGGC-AAATTGCCG-G-  
 WB235\_3:1148439-1149466 Satlength=1028 Nr of Repeats=13 RepeatLength=35  
 seed=TTTAAAATTT Num.seqs=8 Similarity=0.863946  
 71 AATT--G--AA-AA-TTTCGGCAAATCGGC-AAATTGCCG-G-  
 WB235\_3:1315590-1315824 Satlength=235 Nr of Repeats=5 RepeatLength=35  
 seed=CAAATCGGCA Num.seqs=3 Similarity=0.695238  
 50 AATT--G--AA-AA-TTTCGGCAAATCGGC-AAATTGCCG-G-  
 Rev.of\_WB235\_3:2545690-2546082 Satlength=393 Nr of Repeats=11  
 RepeatLength=35 seed=TTTGCCGGAA Num.seqs=7 Similarity=0.807710  
 54 AATT--G--AA-AA-TTTCGGCAAATCGGC-AAATTGCCG-G-  
 WB235\_3:3661285-3661688 Satlength=404 Nr of Repeats=8 RepeatLength=35  
 seed=TTCCGGCAAA Num.seqs=5 Similarity=0.760000  
 79 AATT--G--AA-AA-TTTCGGCAAATCGGC-AAATTGCCG-G-  
 WB235\_3:11817185-11817612 Satlength=428 Nr of Repeats=12 RepeatLength=35  
 seed=AATTGCCGGA Num.seqs=10 Similarity=0.840847  
 60 AATT--G--AA-AA-TTTCGGCAAATCGGC-AAATTGCCG-G-  
 Rev.of\_WB235\_3:12408999-12409471 Satlength=473 Nr of Repeats=10  
 RepeatLength=35 seed=GATTTGCCGG Num.seqs=7 Similarity=0.791446  
 56 AATT--G--AA-AA-TTTCGGCAAATCGGC-AAATTGCCG-G-  
 Rev.of\_WB235\_5:4197817-4198139 Satlength=323 Nr of Repeats=8  
 RepeatLength=35 seed=TTTCAATTCC Num.seqs=7 Similarity=0.885714  
 77 AATT--G--AA-AA-TTTCGGCAAATCGGC-AAATTGCCG-G-  
 WB235\_5:4718387-4718578 Satlength=192 Nr of Repeats=5 RepeatLength=35  
 seed=CGGCAAATCG Num.seqs=3 Similarity=0.479798  
 47 AATT--G--AA-AA-TTTCGGCAAATCGGC-AAATTGCCG-G-  
 WB235\_1:13014176-13014829 Satlength=654 Nr of Repeats=16 RepeatLength=35  
 seed=ATTGCCGGAA Num.seqs=10 Similarity=0.780741  
 61 AATT--G--AA-AA-TTTCGGCAAATCGGN-AAATTGCCG-G-  
 WB235\_2:233654-235183 Satlength=1530 Nr of Repeats=40 RepeatLength=35  
 seed=TTTCCGGCAA Num.seqs=27 Similarity=0.708272  
 78 AATT--G--AA-AA-TTTCGGCAAATCGGC-ANATTGCCG-G-  
 Rev.of\_WB235\_5:2391673-2391869 Satlength=197 Nr of Repeats=4  
 RepeatLength=35 seed=AAATTTTCAA Num.seqs=3 Similarity=0.780864  
 81 AATT--G--AA-AA-TTTCGGCNAATCGGC-AAATTGCCG-G-  
 Rev.of\_WB235\_5:2499952-2500148 Satlength=197 Nr of Repeats=4  
 RepeatLength=35 seed=AAATTTTCAA Num.seqs=3 Similarity=0.780864  
 81 AATT--G--AA-AA-TTTCGGCNAATCGGC-AAATTGCCG-G-  
 Rev.of\_WB235\_3:11687193-11687714 Satlength=522 Nr of Repeats=14  
 RepeatLength=35 seed=CCGATTGCGC Num.seqs=10 Similarity=0.809053  
 58 AATT--G--AA-AA-TTTCNGGCAAATCGGC-AAATTGCCG-G-  
 Rev.of\_WB235\_3:11925619-11926677 Satlength=1059 Nr of Repeats=29  
 RepeatLength=35 seed=TTCAATTCCG Num.seqs=21 Similarity=0.856834  
 76 AATT--G--AA-AA-TTTCNGGCAAATCGGC-AAATTGCCG-G-  
 Rev.of\_WB235\_5:1377073-1377773 Satlength=701 Nr of Repeats=21  
 RepeatLength=35 seed=ATTTTCAATT Num.seqs=15 Similarity=0.700680  
 79 AATT--G--AA-AA-TTTCNGGCAAATCGGC-AAATTGCCG-G-

WB235\_2:14264215-14264530 Satlength=316 Nr of Repeats=8 RepeatLength=35  
 seed=CGGCAAATCG Num.seqs=7 Similarity=0.780864  
 47 AATT--G--NA-AA-TTTCGGCAAATCGGC-AAATTGCCG-G-  
 Rev.of\_WB235\_2:14278881-14279293 Satlength=413 Nr of Repeats=12  
 RepeatLength=35 seed=GCCGGAAATT Num.seqs=11 Similarity=0.952900  
 51 AATT--G--GA-AA-TTTCGGCAAATCGGC-AAATTGCCG-G-  
 Rev.of\_WB235\_1:1814405-1814778 Satlength=374 Nr of Repeats=9  
 RepeatLength=35 seed=TTTGCCGGAA Num.seqs=8 Similarity=0.766700  
 54 AATT--G--AA-AA-TTTCGGCAAATCGGC-AAATTGCCG-G-  
 Rev.of\_WB235\_2:15047976-15048537 Satlength=562 Nr of Repeats=16  
 RepeatLength=35 seed=TTTGCCGGAA Num.seqs=11 Similarity=0.731650  
 54 AATT--G--AA-AA-TTTCGGCAAATCGGC-AAATTGCCG-G-  
 Rev.of\_WB235\_1:2139349-2139629 Satlength=281 Nr of Repeats=8  
 RepeatLength=35 seed=CGGCAAATTG Num.seqs=5 Similarity=0.885714  
 68 AATT--G--AA-AA-TTTCGGCAAATCGGC-AAATTGCCG-G-  
 Rev.of\_WB235\_5:2670563-2670782 Satlength=220 Nr of Repeats=6  
 RepeatLength=35 seed=GCCGGAAATT Num.seqs=4 Similarity=0.752381  
 51 AATT--G--AA-AA-TTTCGGCAAATCGGC-AAATTGCCG-G-  
 Rev.of\_WB235\_2:15210567-15211143 Satlength=577 Nr of Repeats=12  
 RepeatLength=35 seed=CCGATTGCGC Num.seqs=11 Similarity=0.807446  
 58 AATT--C--AA-AA-TTTCGGCAAATCGGC-AAATTGCCG-G-  
 WB235\_3:12244502-12244747 Satlength=246 Nr of Repeats=7 RepeatLength=35  
 seed=AATTGCCGGA Num.seqs=7 Similarity=0.912925  
 60 AATT--C--AA-AA-TTTCGGCAAATCGGC-AAATTGCCG-G-  
 Rev.of\_WB235\_3:2791812-2792160 Satlength=349 Nr of Repeats=10  
 RepeatLength=35 seed=TTTGCCGGAA Num.seqs=8 Similarity=0.859864  
 89 AATT--A--AA-AA-TTTCGGCAAATCGGC-AAATTGCCG-G-  
 WB235\_3:12884539-12885107 Satlength=569 Nr of Repeats=13 RepeatLength=35  
 seed=TGCCGGAATT Num.seqs=8 Similarity=0.817687  
 63 AATT--T--AA-AA-TTTCGGCAAATCGGC-AAATTGCCG-G-  
 WB235\_5:2660817-2661267 Satlength=451 Nr of Repeats=10 RepeatLength=35  
 seed=TTTCGGCAA Num.seqs=7 Similarity=0.807710  
 78 AATT--T--AA-AA-TTTCGGCAAATCGGC-AAATTGCCG-G-  
 WB235\_1:11349013-11350796 Satlength=1784 Nr of Repeats=47 RepeatLength=35  
 seed=GGCAAATCAG Num.seqs=42 Similarity=0.911023  
 48 AATT--G--AA-AA-TTTCGGCAAATCAGC-AAATTGCCG-G-  
 WB235\_2:13598247-13598526 Satlength=280 Nr of Repeats=7 RepeatLength=35  
 seed=TTGCCGGAAT Num.seqs=6 Similarity=0.784127  
 62 AATT--G--AA-TA-TTTCGGCAAATCGGC-AAATTGCCG-G-  
 Rev.of\_WB235\_5:3765128-3765284 Satlength=157 Nr of Repeats=4  
 RepeatLength=35 seed=TTGCCGATTT Num.seqs=3 Similarity=0.784127  
 96 AATT--G--AA-TN-TTTCGGCAAATCGGC-AAATTGCCG-G-  
 Rev.of\_WB235\_1:12977769-12978231 Satlength=463 Nr of Repeats=10  
 RepeatLength=35 seed=GCCGGAAATT Num.seqs=7 Similarity=0.776871  
 51 AATT--N--AN-AA-TTTCGGCAAATCGGC-AAATTGCCG-G-  
 Rev.of\_WB235\_5:2640455-2641508 Satlength=1054 Nr of Repeats=15  
 RepeatLength=35 seed=TCAATTCCGG Num.seqs=10 Similarity=0.832381  
 75 AATT--G--AG-AA-TTTCGGCAAATCGGC-AAATTGCCG-G-  
 WB235\_2:14273310-14273525 Satlength=216 Nr of Repeats=5 RepeatLength=35  
 seed=CGGCAAATTG Num.seqs=3 Similarity=0.586563  
 55 AATT--G--AA-AA-TTTCGGNAAATCGGC-AAATTGCCG-G-  
 Rev.of\_WB235\_4:1928447-1928762 Satlength=316 Nr of Repeats=8  
 RepeatLength=35 seed=GAAATTTTCA Num.seqs=7 Similarity=0.927438  
 82 AATT--G--AA-AA-TTTCGTCAAATCGGC-AAATTGCCG-G-

Rev.of\_WB235\_2:15044151-15044326 Satlength=176 Nr of Repeats=5  
 RepeatLength=35 seed=TTTGCCGGAA Num.seqs=3 Similarity=0.771429  
 54 AATT--N--AA-AA-TTTCGGCAAATCGGC-AAATTGCCN-G-  
 Rev.of\_WB235\_1:2165416-2165854 Satlength=439 Nr of Repeats=10  
 RepeatLength=35 seed=TTTGCCGGAA Num.seqs=6 Similarity=0.735873  
 54 AATT--C--AA-AA-TTTCGGCAAATCGGC-AAATTGTCG-G-  
 WB235\_1:13453071-13453246 Satlength=176 Nr of Repeats=5 RepeatLength=35  
 seed=TGAAAATTTTC Num.seqs=5 Similarity=0.878095  
 72 AATT--G--AA-AA-TTTCGGCAAATCGGC-AAATTGTCG-G-  
 WB235\_1:14619236-14619481 Satlength=246 Nr of Repeats=6 RepeatLength=35  
 seed=CAAATCGGCA Num.seqs=4 Similarity=0.733333  
 85 AATT--G--AA-AA-TTTCGGCAAATCGGC-AAATTGTCG-G-  
 Rev.of\_WB235\_3:2066729-2067447 Satlength=719 Nr of Repeats=12  
 RepeatLength=35 seed=TTTGCCGGAA Num.seqs=10 Similarity=0.926349  
 89 AATT--G--AA-AA-TTTCGGCAAATCGGC-AAATTGTCG-G-  
 Rev.of\_WB235\_5:5125946-5126346 Satlength=401 Nr of Repeats=8  
 RepeatLength=35 seed=TTGCCGATTT Num.seqs=5 Similarity=0.767619  
 61 AATT--G--AA-AA-TTTCGGCAAATCGGC-AAATTGNCG-G-  
 WB235\_2:14269513-14269895 Satlength=383 Nr of Repeats=11 RepeatLength=35  
 seed=CCGGCAAATC Num.seqs=8 Similarity=0.757275  
 81 AATT--G--AA-AC-TTTCGGCAAATCGGC-AAATTGGCG-G-  
 WB235\_3:12005666-12006008 Satlength=343 Nr of Repeats=8 RepeatLength=35  
 seed=GGAATTGAAA Num.seqs=5 Similarity=0.843810  
 102 AATT--G--AA-AA-TTTCGGCAAATCGGC-AAATTGGCG-G-  
 WB235\_5:15168733-15168927 Satlength=195 Nr of Repeats=6 RepeatLength=35  
 seed=GGAATTGAAA Num.seqs=4 Similarity=0.904762  
 102 AATT--G--AA-AA-TTTCGGCAAATCGGC-AAATTGGCG-G-  
 Rev.of\_WB235\_1:14843491-14843700 Satlength=210 Nr of Repeats=6  
 RepeatLength=35 seed=TTTCAATTCC Num.seqs=5 Similarity=0.878095  
 77 AATT--G--AA-AG-TTTTCGGCAAATCGGC-AAATTGCCG-G-  
 Rev.of\_WB235\_4:2872402-2872909 Satlength=508 Nr of Repeats=14  
 RepeatLength=35 seed=ATTCCGGCAA Num.seqs=11 Similarity=0.820606  
 107 AATT--G--AA-AA-TTTTCGGCAAATCGGC-AAATTGCCG-G-  
 Rev.of\_WB235\_1:2738743-2738953 Satlength=211 Nr of Repeats=6  
 RepeatLength=35 seed=AATTTCATT Num.seqs=6 Similarity=0.860317  
 44 AATT--G--AA-AT-TTTCGGCAAATCGGC-AAGTTGCCG-G-  
 WB235\_1:10993314-10993636 Satlength=323 Nr of Repeats=8 RepeatLength=35  
 seed=GCCGGAATTG Num.seqs=7 Similarity=0.829478  
 64 AATT--G--AA-AT-TTTCGGCAAATCGGC-AAATTGCCG-G-  
 Rev.of\_WB235\_2:13642102-13642382 Satlength=281 Nr of Repeats=7  
 RepeatLength=35 seed=CTTGCCGATT Num.seqs=6 Similarity=0.862857  
 62 AATT--G--AA-AA-TTTCGGCAAATCGGC-AAGTTGCCG-G-  
 WB235\_4:3309618-3310597 Satlength=980 Nr of Repeats=27 RepeatLength=35  
 seed=AATCGGCAAG Num.seqs=25 Similarity=0.850540  
 87 AATT--G--AA-AA-TTTCGGCAAATCGGC-AAGTTACCG-G-  
 Rev.of\_WB235\_3:10661890-10662218 Satlength=329 Nr of Repeats=9  
 RepeatLength=35 seed=CAATTGCGG Num.seqs=6 Similarity=0.885714  
 65 ATAT--G--AA-AA-TTTCGGCAAATCGGC-AAATTGCCG-G-  
 Rev.of\_WB235\_5:1813009-1813219 Satlength=211 Nr of Repeats=7  
 RepeatLength=35 seed=TCCGGCAATT Num.seqs=5 Similarity=0.833333  
 70 ATTT--N--AA-AA-TTTCGGCAAATCGGC-AAATTGCCG-G-  
 WB235\_1:1884484-1884939 Satlength=456 Nr of Repeats=11 RepeatLength=35  
 seed=AAATCGGCAA Num.seqs=8 Similarity=0.753742  
 51 AATT--G--AA-AA-TTTCGGCAAATCGGC-AAATTGCCG-A-

Rev.of\_WB235\_2:13740296-13741317 Satlength=1022 Nr of Repeats=28  
 RepeatLength=35 seed=TTTGCCGGAA Num.seqs=18 Similarity=0.750016  
 54 AATT--C--AA-AA-TTTCGGCAAATCGGC-AAATTGCCG-A-  
 Rev.of\_WB235\_1:1949999-1950277 Satlength=279 Nr of Repeats=8  
 RepeatLength=35 seed=TTGCCGGAAA Num.seqs=6 Similarity=0.654655  
 53 AATT--G--AA-CA-TTTCGGCAAATCGGC-AAATTGCCG-A-  
 WB235\_5:17880208-17882252 Satlength=2045 Nr of Repeats=55 RepeatLength=35  
 seed=TCCGGCAAAT Num.seqs=37 Similarity=0.726298  
 80 AATT--G--AA-AA-TTTCGGCAAATCGGC-AAATTGCCG-A-  
 WB235\_4:3149092-3151000 Satlength=1909 Nr of Repeats=53 RepeatLength=35  
 seed=GGCAAATTGC Num.seqs=42 Similarity=0.867264  
 56 AATT--G--AA-CA-TTTCGGCAAATAGGC-AAATTGCCG-A-  
 WB235\_1:1083222-1083538 Satlength=317 Nr of Repeats=8 RepeatLength=35  
 seed=CGGCAAATCG Num.seqs=7 Similarity=0.873016  
 47 AATT--G--AA-AA-TTTCGGCAAATCGGC-ATTTTGCCG-G-  
 Rev.of\_WB235\_5:1385851-1386349 Satlength=499 Nr of Repeats=9  
 RepeatLength=35 seed=TTTGCCGGAA Num.seqs=6 Similarity=0.779048  
 54 AATT--G--AA-AA-TTTCGGCAAATCCGC-AAATTGCCG-G-  
 Rev.of\_WB235\_5:17991128-17991485 Satlength=358 Nr of Repeats=5  
 RepeatLength=35 seed=AATTCCGGCA Num.seqs=3 Similarity=0.822222  
 73 AATT--G--AA-AA-TTTCGGCAAACGGC-ATATTGCCG-G-  
 WB235\_1:14481352-14481947 Satlength=596 Nr of Repeats=17 RepeatLength=35  
 seed=CGGCAAATTG Num.seqs=11 Similarity=0.941818  
 55 AATC--G--AA-AA-TTTCGGCAAACGGC-AAATTGCCG-G-  
 Rev.of\_WB235\_5:4193678-4193984 Satlength=307 Nr of Repeats=5  
 RepeatLength=35 seed=AATTTTCAAT Num.seqs=4 Similarity=0.847619  
 80 AATT--G--AA-AA-TTTCGGCAAACGGC-AAATTGCAG-G-  
 Rev.of\_WB235\_3:12629696-12629957 Satlength=262 Nr of Repeats=7  
 RepeatLength=35 seed=TAATTCCGGC Num.seqs=6 Similarity=0.916191  
 74 AATT--A--AA-AA-TTTCGGCAAACGGC-AAATTGCCG-G-  
 WB235\_3:12636128-12637282 Satlength=1155 Nr of Repeats=29 RepeatLength=35  
 seed=GGCAAACCGG Num.seqs=25 Similarity=0.815309  
 83 AATT--A--AN-AA-TTTCGGCAAACGGC-AAATTGCCG-G-  
 Rev.of\_WB235\_3:12692942-12693363 Satlength=422 Nr of Repeats=8  
 RepeatLength=35 seed=GGAAATTTTA Num.seqs=5 Similarity=0.820952  
 83 AATT--T--AA-AA-TTTCGGCAAACGGC-AAATTGCCG-G-  
 WB235\_5:775870-776051 Satlength=182 Nr of Repeats=5 RepeatLength=35  
 seed=TTTCGGCAA Num.seqs=3 Similarity=0.834921  
 78 AATT--G--AA-GA-TTTCGGCAAACGGC-NAATTGCCG-G-  
 Rev.of\_WB235\_1:13800189-13800502 Satlength=314 Nr of Repeats=9  
 RepeatLength=35 seed=AATTCCGGCA Num.seqs=7 Similarity=0.756173  
 73 AATT--T--AA-AT-TTTCGGCAAATNGGC-AAATTGCCG-G-  
 WB235\_3:3030347-3030891 Satlength=545 Nr of Repeats=14 RepeatLength=35  
 seed=AATTGCCGGA Num.seqs=11 Similarity=0.836537  
 95 AATT--T--AA-AA-TTTCGGCAAATTGGC-AAATTGCCG-G-  
 WB235\_3:11152069-11152305 Satlength=237 Nr of Repeats=6 RepeatLength=35  
 seed=AATTGCCGGA Num.seqs=4 Similarity=0.720635  
 95 AATT--A--AA-AA-TTTCGGCAAATTGGC-AAATTGCCG-G-  
 WB235\_3:11924167-11924393 Satlength=227 Nr of Repeats=6 RepeatLength=35  
 seed=TTCCGGCAAA Num.seqs=4 Similarity=0.676190  
 114 AATT--G--AA-AA-TTTCGGCAAATTGGC-AAATTGCCG-G-  
 Rev.of\_WB235\_5:2654959-2655536 Satlength=578 Nr of Repeats=16  
 RepeatLength=35 seed=TTTGCCGGAA Num.seqs=10 Similarity=0.790053  
 124 AATT--G--AA-AA-TTTCGGCAAATTGGC-AAATTGNCG-G-

WB235\_3:3542667-3542838 Satlength=172 Nr of Repeats=5 RepeatLength=34  
 seed=AATTGAAATT Num.seqs=4 Similarity=0.800794  
 34 AATT--G--AA--A-TTTCCGGCAAAGCGGC-AAATTGTCG-G-  
 Rev.of\_WB235\_1:3602994-3603167 Satlength=174 Nr of Repeats=5  
 RepeatLength=35 seed=TTTGCCGGAA Num.seqs=3 Similarity=0.822222  
 54 AATT--G--AA-CA-TTTCCGGCAAACCGGC-AAATTGTCG-G-  
 WB235\_1:11186372-11187503 Satlength=1132 Nr of Repeats=15 RepeatLength=35  
 seed=TTCCGGCAAA Num.seqs=9 Similarity=0.743915  
 44 AACT--G--AA-AA-TTTCCGGCAAATCGGC-AAATTGCCN-G-  
 WB235\_3:11546762-11547752 Satlength=991 Nr of Repeats=24 RepeatLength=35  
 seed=CGGCAAATCG Num.seqs=16 Similarity=0.809524  
 47 AACT--G--AA-AA-TTTCCGGCAAATCGGC-AAATTGCCA-A-  
 Rev.of\_WB235\_2:12757809-12758089 Satlength=281 Nr of Repeats=8  
 RepeatLength=35 seed=ATTTTCAGGCA Num.seqs=8 Similarity=0.791832  
 73 AAAT--G--AA-AA-TTTCTGGCAAATCGGC-AAATTGCCT-G-  
 Rev.of\_WB235\_2:12757828-12758945 Satlength=1118 Nr of Repeats=16  
 RepeatLength=35 seed=TTTGCCGGAA Num.seqs=10 Similarity=0.752804  
 89 AAAT--G--AA-AA-TTTCCGGCAAATCGGC-AAATTGCCN-G-  
 WB235\_2:4296664-4296988 Satlength=325 Nr of Repeats=8 RepeatLength=35  
 seed=TTCCGGCAAA Num.seqs=5 Similarity=0.790476  
 44 AATT--G--AA-AA-TTTCCGGCAAACCGGC-AAATTGCCA-A-  
 WB235\_3:12004285-12004750 Satlength=466 Nr of Repeats=12 RepeatLength=35  
 seed=AAAATTTCCG Num.seqs=9 Similarity=0.877249  
 74 AATT--G--AA-AA-TTTCCGGCAAATCAGC-TAATTGCCA-G-  
 WB235\_3:12289600-12291140 Satlength=1541 Nr of Repeats=44 RepeatLength=35  
 seed=TTGCCAGAAT Num.seqs=44 Similarity=0.791362  
 97 AATT--G--AA-AA-ATTCCGGNAAATCGGC-AAATTGCCA-G-  
 Rev.of\_WB235\_5:1273379-1274003 Satlength=625 Nr of Repeats=14  
 RepeatLength=35 seed=AATTCTGGCA Num.seqs=12 Similarity=0.883983  
 108 AATT--G--AA-AA-TTTCCGGCAAATCGGT-AATTTGCCA-G-  
 Rev.of\_WB235\_5:1273379-1274654 Satlength=1276 Nr of Repeats=15  
 RepeatLength=35 seed=AATTCTGGCA Num.seqs=12 Similarity=0.883983  
 108 AATT--G--AA-AA-TTTCCGGCAAATCGGT-AATTTGCCA-G-  
 WB235\_2:14780596-14780942 Satlength=347 Nr of Repeats=4 RepeatLength=35  
 seed=TCCGGCAAAT Num.seqs=3 Similarity=0.586420  
 45 AATT--T--AN-AA-TNTCCGGCAAATCGGC-AAATTGCCG-A-  
 WB235\_5:19799341-19799769 Satlength=429 Nr of Repeats=12 RepeatLength=35  
 seed=AATTTCCGGC Num.seqs=11 Similarity=0.926580  
 76 AATT--T--AA-AA-TTTCCGGCAAATCGGC-AAATAACCG-G-  
 Rev.of\_WB235\_1:14764447-14764676 Satlength=230 Nr of Repeats=5  
 RepeatLength=34 seed=GAAATTTCAA Num.seqs=4 Similarity=0.901961  
 46 AGTT--G--AA--A-TTTCCGGCAAATTGGC-TAATTGCCG-G-  
 WB235\_2:14137014-14137524 Satlength=511 Nr of Repeats=14 RepeatLength=34  
 seed=CGGAATTGAA Num.seqs=13 Similarity=0.833082  
 65 AATT--G--AA--A-TTTCCGGCAAATTGGT-AAAATGCCG-G-  
 Rev.of\_WB235\_3:12532752-12533511 Satlength=760 Nr of Repeats=21  
 RepeatLength=34 seed=TTTCAATTCC Num.seqs=15 Similarity=0.747664  
 76 AATT--G--AA--A-NTTCCGGCAAATTGGT-AAATTGCCG-G-  
 Rev.of\_WB235\_3:133200-133804 Satlength=605 Nr of Repeats=7  
 RepeatLength=34 seed=AATTCCGGCA Num.seqs=5 Similarity=0.976471  
 72 AATT--G--AA--A-TTTTTGGCAAATTGGT-AAATTGCCG-G-  
 WB235\_4:1348897-1349230 Satlength=334 Nr of Repeats=9 RepeatLength=34  
 seed=ATTGCCGGAA Num.seqs=7 Similarity=0.886088  
 94 AATT--G--AA--A-TTTCTGGCAAATTGGC-AAATTGCCG-G-

WB235\_5:4685532-4685994 Satlength=463 Nr of Repeats=10 RepeatLength=35  
 seed=GCAAAATCGGC Num.seqs=6 Similarity=0.837460  
 15 -ATTC-G--AA-AA-TGTCCGGCAAATCGGC-AAATTGCCG-G-  
 Rev.of\_WB235\_2:13831950-13832774 Satlength=825 Nr of Repeats=18  
 RepeatLength=34 seed=AATTCCGGCA Num.seqs=12 Similarity=0.803922  
 4 AATT--G--AA--A-TTTCCGATAAATCAGC-AAATTGCCG-G-  
 WB235\_3:10489911-10490082 Satlength=172 Nr of Repeats=5 RepeatLength=34  
 seed=TTTCCGGCAA Num.seqs=4 Similarity=0.819841  
 8 AATC-----AA-AA-TTTCCGGCAAATTGAC-AAATTGCCG-G-  
 WB235\_5:3702753-3703068 Satlength=316 Nr of Repeats=9 RepeatLength=35  
 seed=AAAATTTCCG Num.seqs=9 Similarity=0.834921  
 5 AATT--G--AA-AA-TTTCCGGCAAACAGGC-AAATTTCTG-G-  
 WB235\_1:2557777-2557986 Satlength=210 Nr of Repeats=6 RepeatLength=35  
 seed=TTGCCGGAAT Num.seqs=5 Similarity=0.794286  
 28 AATT--G--AA-AA-TTTTTGGNAAATCGGC-AAATTGCCG-G-  
 Rev.of\_WB235\_1:2844921-2845096 Satlength=176 Nr of Repeats=4  
 RepeatLength=35 seed=TTTGCCGATT Num.seqs=3 Similarity=0.733333  
 28 AATT--A--AA-AA-TTTTGNCAAATCGGC-AAATTGCCG-G-  
 Rev.of\_WB235\_1:11425096-11425445 Satlength=350 Nr of Repeats=9  
 RepeatLength=35 seed=ATTCCGGCAA Num.seqs=6 Similarity=0.888254  
 38 AATT--G--AA-AA-TTTCTGGAAAATCGGC-AAATTGCCG-G-  
 Rev.of\_WB235\_1:14811659-14812009 Satlength=351 Nr of Repeats=10  
 RepeatLength=35 seed=AATTCCGGCA Num.seqs=10 Similarity=0.804115  
 39 AATT--G--AA-AA-TTTCAGGAAAATCGGC-AAATTGCCG-G-  
 WB235\_3:3037879-3038500 Satlength=622 Nr of Repeats=13 RepeatLength=35  
 seed=AAATCGGCAA Num.seqs=8 Similarity=0.885714  
 52 AATT--G--AA-AA-TTTCAGAAAATCGGC-AAATTGCCG-G-  
 WB235\_2:13761268-13762971 Satlength=1704 Nr of Repeats=50 RepeatLength=35  
 seed=CCGGAATTGA Num.seqs=37 Similarity=0.869813  
 66 AATT--G--AA-AA-TTTCTGGAAAATCAAC-AAATTGCCG-G-  
 Rev.of\_WB235\_5:1239922-1240281 Satlength=360 Nr of Repeats=10  
 RepeatLength=35 seed=GAAATTTTCA Num.seqs=8 Similarity=0.842177  
 48 AATT--G--AA-AA-TTTCTGGCAATTTGGC-AAATTGCCG-G-  
 WB235\_2:10713445-10714142 Satlength=698 Nr of Repeats=8 RepeatLength=35  
 seed=TTTCTGGCAA Num.seqs=5 Similarity=0.900952  
 44 AAAT--T--AA-AA-TTTCTGGCAAACCGGC-AAATTGCCG-A-  
 WB235\_3:12341199-12341722 Satlength=524 Nr of Repeats=7 RepeatLength=35  
 seed=TTGCCGGAAT Num.seqs=5 Similarity=0.729630  
 63 AATT--G--NA-AA-TTTCTGGCAAACCGGC-AAATTGCCG-G-  
 WB235\_2:15211519-15211997 Satlength=479 Nr of Repeats=9 RepeatLength=35  
 seed=TTGCCGGAAT Num.seqs=6 Similarity=0.720635  
 63 AATT--T--AA-AA-TTTCTGGCAAACCGCC-AAATTGCCG-G-  
 Rev.of\_WB235\_3:11311767-11311976 Satlength=210 Nr of Repeats=6  
 RepeatLength=35 seed=GATTTGCCGG Num.seqs=5 Similarity=0.850926  
 22 ATTT----TAA-TA-TTTCCGGCAAATCGAT-AAATTGCCG-G-  
 Rev.of\_WB235\_5:4443918-4444112 Satlength=195 Nr of Repeats=5  
 RepeatLength=35 seed=ATTCCGGCAA Num.seqs=3 Similarity=0.822222  
 38 AATT----TAA-TA-GTTCCGGCAAATCGGC-AAATTGCCG-G-  
 WB235\_5:19762622-19764008 Satlength=1387 Nr of Repeats=40 RepeatLength=35  
 seed=CCGGCAAATC Num.seqs=26 Similarity=0.887707  
 47 ATTT--G-TAA--A-TTTCCGGCAAATCGAN-AAATTACCG-G-  
 Rev.of\_WB235\_4:2851958-2852560 Satlength=603 Nr of Repeats=7  
 RepeatLength=35 seed=TTTTCAATTC Num.seqs=5 Similarity=0.801905  
 9 AATT--G--AA-AA-ATTCAGGCAAATCTGC-AAATTGCTT-G-



Rev.of\_WB235\_5:3763703-3764133 Satlength=431 Nr of Repeats=4  
 RepeatLength=35 seed=GCCGATTTGC Num.seqs=3 Similarity=0.743827  
 25 ANTT--G--AA-CA-TTTCAGGCAAATCGGC-AAATTGNCA-G-  
 WB235\_1:1211856-1212413 Satlength=558 Nr of Repeats=15 RepeatLength=35  
 seed=AAATCGGCAA Num.seqs=12 Similarity=0.802020  
 17 AAAT--G--AA-AG-ATTCCGGCAAATCGGC-AATTTGCCN-A-  
 Rev.of\_WB235\_1:1919828-1922029 Satlength=2202 Nr of Repeats=58  
 RepeatLength=35 seed=TTGCCGATTT Num.seqs=42 Similarity=0.889475  
 27 AAAT--G--AA-AA-TTTCGGCAAATCGGC-AATTTGCNA-A-  
 WB235\_5:4190322-4190733 Satlength=412 Nr of Repeats=11 RepeatLength=35  
 seed=TTCCGGCAAA Num.seqs=7 Similarity=0.865760  
 45 AAAT--G--AA-AA-TTTCGGCAAACCGGC-AATTTGCCA-A-  
 Rev.of\_WB235\_3:11422288-11422568 Satlength=281 Nr of Repeats=6  
 RepeatLength=35 seed=TTTGCCGGAA Num.seqs=4 Similarity=0.790476  
 55 AAAT--C--AA-AA-TTTCGGCAAATCGGC-AATTTGCCA-G-  
 WB235\_3:12823844-12823984 Satlength=141 Nr of Repeats=4 RepeatLength=35  
 seed=CGGCAATTTG Num.seqs=4 Similarity=0.936508  
 56 AAAT--C--AA-AA-TTTCGGCAAATCGGC-AATTTGCCA-A-  
 Rev.of\_WB235\_5:1388994-1389344 Satlength=351 Nr of Repeats=8  
 RepeatLength=35 seed=TGCCGGAAAT Num.seqs=5 Similarity=0.790476  
 88 AAAT--C--AA-AA-TTTCGGCAAATCGGC-AATTTGCCA-A-  
 Rev.of\_WB235\_3:12722182-12722605 Satlength=424 Nr of Repeats=13  
 RepeatLength=35 seed=AAATTTTGAT Num.seqs=9 Similarity=0.900529  
 82 AAAT--C--AA-AA-TTTCGGCAAATCGGC-AAATTGCCA-A-  
 Rev.of\_WB235\_5:4146424-4146572 Satlength=149 Nr of Repeats=4  
 RepeatLength=35 seed=TTTGCCGGAA Num.seqs=3 Similarity=0.682540  
 55 AAAT--N--AA-AA-TTTCGGCAAAACCGGC-AATTTACCA-A-  
 Rev.of\_WB235\_5:5215493-5215916 Satlength=424 Nr of Repeats=9  
 RepeatLength=35 seed=CGATTTGCCG Num.seqs=6 Similarity=0.576768  
 58 AAAT--A--AA-AA-TTTCGGCAAATCGGC-AATTTGCC-GA-  
 WB235\_6:209349-209653 Satlength=305 Nr of Repeats=8 RepeatLength=36  
 seed=ATAAAAATTT Num.seqs=7 Similarity=0.865961  
 73 AAAT--A--AA-AA-TTTCGGCAAATCGGC-AATTTGCCAGA-  
 Rev.of\_WB235\_4:1295080-1295440 Satlength=361 Nr of Repeats=9  
 RepeatLength=36 seed=TTATTTTCTG Num.seqs=8 Similarity=0.838624  
 77 AAAT--A--AA-AA-TTTCGGCAAATGGGC-AATTTGTCAGA-  
 Rev.of\_WB235\_4:1299931-1300254 Satlength=324 Nr of Repeats=8  
 RepeatLength=36 seed=TTTGCCGGAA Num.seqs=5 Similarity=0.859259  
 91 AAAT--A--AA-AA-TTTCGGCAAATCGGC-AATTTGTCAGA-  
 Rev.of\_WB235\_1:1935250-1936853 Satlength=1604 Nr of Repeats=40  
 RepeatLength=35 seed=GAAATTTTCA Num.seqs=33 Similarity=0.890620  
 48 AACT--G--AA-AA-TTTCGGCAAATCGGC-AATTTGCCG-A-  
 Rev.of\_WB235\_1:1935250-1938219 Satlength=2970 Nr of Repeats=70  
 RepeatLength=35 seed=GAAATTTTCA Num.seqs=48 Similarity=0.836375  
 48 AACT--G--AA-AA-TTTCGGCAAATCGGC-AATTTGCCG-A-  
 WB235\_1:14449256-14449536 Satlength=281 Nr of Repeats=8 RepeatLength=35  
 seed=AAAAATTTCCG Num.seqs=8 Similarity=0.952381  
 75 AAGT--G--AA-AA-TTTCGGCAAATCGGC-AATTTACCG-A-  
 Rev.of\_WB235\_1:14452267-14454642 Satlength=2376 Nr of Repeats=68  
 RepeatLength=35 seed=GAAATTTTCA Num.seqs=67 Similarity=0.938593  
 83 AAGT--G--AA-AA-TTTCGGCAAATCGGC-AATTTACCG-A-  
 WB235\_5:1940104-1940384 Satlength=281 Nr of Repeats=8 RepeatLength=35  
 seed=GGCAAATCGG Num.seqs=8 Similarity=0.914286  
 84 AAAT--G--AA-AA-TTTCGGCAAATCGGC-AATTTTCCG-A-

WB235\_4:1654913-1655123 Satlength=211 Nr of Repeats=6 RepeatLength=35  
 seed=ATTTCCGGCA Num.seqs=6 Similarity=0.819683  
 78 AAAT--G--AA-AA-TTTCCGGCAAATCGGC-AATATGCCG-A-  
 WB235\_4:16403739-16404089 Satlength=351 Nr of Repeats=10 RepeatLength=35  
 seed=CAAATCGGCA Num.seqs=8 Similarity=0.824490  
 86 AATT--G--AA-AA-TTTCCGGCAAATCGGC-AATATGCCA-A-  
 WB235\_4:16409693-16409938 Satlength=246 Nr of Repeats=7 RepeatLength=35  
 seed=GCAAATCGGC Num.seqs=7 Similarity=0.842177  
 120 AATT--G--AA-AA-TTTCCGGCAAATCGGC-AATATGCCA-A-  
 Rev.of\_WB235\_4:16408366-16409098 Satlength=733 Nr of Repeats=21  
 RepeatLength=35 seed=TTTGCCATAT Num.seqs=16 Similarity=0.860000  
 106 AATT--G--AA-AT-TTTCCGGCAAATCGGC-AATATGCCA-A-  
 Rev.of\_WB235\_2:4569011-4569221 Satlength=211 Nr of Repeats=5  
 RepeatLength=35 seed=TTTGCCGAA Num.seqs=4 Similarity=0.757716  
 55 AAAT--G--AA-AT-TTTCCGGCAAATCGGT-AATTTGCCG-A-  
 Rev.of\_WB235\_5:19795837-19797364 Satlength=1528 Nr of Repeats=40  
 RepeatLength=35 seed=GAAATTTTCA Num.seqs=29 Similarity=0.756979  
 83 AAAT--G--AA-AA-TTTCCGGCAAATCNGT-AATTTGCCG-A-  
 WB235\_1:11190690-11191449 Satlength=760 Nr of Repeats=4 RepeatLength=35  
 seed=TCGGCAAATT Num.seqs=3 Similarity=1.000000  
 20 AAAT--G--AA-AA-TTTCCGGCAAATCGGC-AAATTACGG-A-  
 Rev.of\_WB235\_2:2529567-2530441 Satlength=875 Nr of Repeats=24  
 RepeatLength=35 seed=CCGGAAATTT Num.seqs=16 Similarity=0.798413  
 51 AAAT--G--AA-AA-TTTCCGGCAAATCGGC-AAATCGCCG-A-  
 Rev.of\_WB235\_5:967850-968138 Satlength=289 Nr of Repeats=7  
 RepeatLength=35 seed=TGCCGATTTG Num.seqs=5 Similarity=0.809524  
 26 AAAT--G--AA-CA-TTTCCGGCAAATCGGC-AAATTCTCG-A-  
 Rev.of\_WB235\_2:13422904-13423919 Satlength=1016 Nr of Repeats=29  
 RepeatLength=35 seed=GAATTTTGA Num.seqs=29 Similarity=0.850622  
 48 AAAT--C--AA-AA-ATTCCGGCAAATCGGC-AAATTGCCG-A-  
 Rev.of\_WB235\_3:12731873-12732374 Satlength=502 Nr of Repeats=16  
 RepeatLength=35 seed=ATTTGCCGGA Num.seqs=10 Similarity=0.867936  
 56 AAAT--C--AA-AA-TTTCCGGCAAATCGGC-ATATTGCCG-G-  
 Rev.of\_WB235\_5:5117986-5118371 Satlength=386 Nr of Repeats=10  
 RepeatLength=35 seed=TGCCGGAAT Num.seqs=6 Similarity=0.730794  
 88 AAAT--C--AA-AA-TTTCCGGCAAATCGGC-ATTTGCCG-G-  
 WB235\_4:4355433-4355651 Satlength=219 Nr of Repeats=5 RepeatLength=35  
 seed=TTCCGGCAAA Num.seqs=3 Similarity=0.675676  
 45 AAAT--C--AG-AG-TTTCCGGCAAATCGAC-AATTTGCCG-A-  
 WB235\_2:13681580-13681759 Satlength=180 Nr of Repeats=5 RepeatLength=36  
 seed=TTGCCATAAA Num.seqs=4 Similarity=0.938272  
 29 AAAT--T--AA-AA-TTTCCGGCAAATCAGCAAATTTGCCT-A-  
 Rev.of\_WB235\_4:1931275-1932180 Satlength=906 Nr of Repeats=26  
 RepeatLength=35 seed=CATTTTCGCC Num.seqs=20 Similarity=0.946867  
 40 AAAT--G--GA-AA-TTTCCGGCAAACCGGC-AATTCGGCG-A-  
 Rev.of\_WB235\_4:1931275-1933389 Satlength=2115 Nr of Repeats=50  
 RepeatLength=35 seed=CATTTTCGCC Num.seqs=38 Similarity=0.954101  
 40 AAAT--G--GA-AA-TTTCCGGCAAACCGGC-AATTCGGCG-A-  
 Rev.of\_WB235\_1:3028822-3029013 Satlength=192 Nr of Repeats=5  
 RepeatLength=35 seed=TTGCCGAAA Num.seqs=3 Similarity=0.808642  
 19 AATT-AC--AA--A-TTTCCGGCAAATCGGC-AATTTGTGCG-G-  
 WB235\_5:18042826-18043263 Satlength=438 Nr of Repeats=10 RepeatLength=35  
 seed=TTTCCGGCAA Num.seqs=6 Similarity=0.790432  
 45 AATT-TG--AA--AGTTTCCGGCAAATCGGC-ATTTTGCCG-G-

Rev.of\_WB235\_1:3114471-3114865 Satlength=395 Nr of Repeats=8  
RepeatLength=35 seed=CGATTTGCCG Num.seqs=6 Similarity=0.862857  
23 AAAT--G--AA-TA-TTTCGGCAAATCGGC-AGTTTGCCG-G-  
WB235\_3:11314293-11314573 Satlength=281 Nr of Repeats=6 RepeatLength=35  
seed=TTGCCGGATT Num.seqs=4 Similarity=0.815873  
28 ATTG--G--AA-TA-TTTCGGCAAATCGGC-AATTGCGG-G-  
WB235\_1:3459203-3459616 Satlength=414 Nr of Repeats=8 RepeatLength=35  
seed=TCCGGCAAAT Num.seqs=5 Similarity=0.939048  
46 AAGT--C--AA-AA-ATTCCGGCAAATCGGA-AATCTGCCG-G-  
Rev.of\_WB235\_4:4792114-4792760 Satlength=647 Nr of Repeats=17  
RepeatLength=35 seed=TTGCCGGAAA Num.seqs=13 Similarity=0.909646  
54 AAAC--C--AA-AA-TTTCGGCAAATCGGA-AACTTGCCG-G-  
WB235\_1:2111857-2112268 Satlength=412 Nr of Repeats=7 RepeatLength=35  
seed=CAAACCGGCA Num.seqs=5 Similarity=0.675926  
15 AATT-----AA-CA-TTNGAGCAAACCGGC-AANTTGCCG-AA

\* \*  
Consensus:

AAAtGgAAaATTTCCGGCAAATCGGCAAaTTGCCGg

>WB235\_Fam\_2\_12\_169 Nr. of seq. 169 Alignment length(with gaps) = 14  
Alignment score = 0.769942  
WB235\_3:2455329-2456409 Satlength=1081 Nr of Repeats=40 RepeatLength=10  
seed=AGGCAGGCTT Num.seqs=27 Similarity=0.883001  
0 AG-GC---AGGCTT  
Rev.of\_WB235\_1:1-835 Satlength=835 Nr of Repeats=55 RepeatLength=12  
seed=CTAAGCCTAA Num.seqs=50 Similarity=0.958639  
2 AG-GCTT-AGGCTT  
Rev.of\_WB235\_1:556995-557143 Satlength=149 Nr of Repeats=8  
RepeatLength=12 seed=CTAAGCCTAA Num.seqs=5 Similarity=0.811111  
2 AG-GCTT-AGGCTT  
WB235\_1:566943-567081 Satlength=139 Nr of Repeats=8 RepeatLength=12  
seed=AGGCTTAGGC Num.seqs=5 Similarity=0.844444  
12 AG-GCTT-AGGCTT  
Rev.of\_WB235\_1:640909-641017 Satlength=109 Nr of Repeats=6  
RepeatLength=12 seed=TAAGCCTAAG Num.seqs=4 Similarity=0.759259  
13 AG-GCTT-AGGCTT  
WB235\_1:727038-727274 Satlength=237 Nr of Repeats=5 RepeatLength=12  
seed=GCTTAGGCTT Num.seqs=3 Similarity=0.777778  
2 AG-GCTT-AGGCTT  
Rev.of\_WB235\_1:779157-779331 Satlength=175 Nr of Repeats=12  
RepeatLength=12 seed=GCCTAAGCCT Num.seqs=10 Similarity=0.933333  
10 AG-GCTT-AGGCTT  
Rev.of\_WB235\_1:806422-806644 Satlength=223 Nr of Repeats=16  
RepeatLength=12 seed=GCCTAAGCCT Num.seqs=10 Similarity=0.782716  
10 AG-GCTT-AGGCTT  
WB235\_1:814462-814642 Satlength=181 Nr of Repeats=13 RepeatLength=12  
seed=GCTTAGGCTT Num.seqs=9 Similarity=0.895062  
2 AG-GCTT-AGGCTT  
WB235\_1:833515-834452 Satlength=938 Nr of Repeats=48 RepeatLength=12  
seed=CTTAGGCTTA Num.seqs=32 Similarity=0.819668  
9 AG-GCTT-AGGCTT

WB235\_1:846174-846372 Satlength=199 Nr of Repeats=12 RepeatLength=12  
 seed=GCTTAGGCTT Num.seqs=8 Similarity=0.888889  
 2 AG-GCTT-AGGCTT  
 Rev.of\_WB235\_1:942559-942637 Satlength=79 Nr of Repeats=6 RepeatLength=12  
 seed=AGCCTAAGCC Num.seqs=5 Similarity=0.866667  
 11 AG-GCTT-AGGCTT  
 Rev.of\_WB235\_1:1000380-1000606 Satlength=227 Nr of Repeats=14  
 RepeatLength=12 seed=GCCTAAGCCT Num.seqs=9 Similarity=0.854938  
 10 AG-GCTT-AGGCTT  
 Rev.of\_WB235\_1:1126721-1126876 Satlength=156 Nr of Repeats=10  
 RepeatLength=12 seed=CCTAAGCCTA Num.seqs=6 Similarity=0.866667  
 9 AG-GCTT-AGGCTT  
 WB235\_1:2269401-2269479 Satlength=79 Nr of Repeats=6 RepeatLength=12  
 seed=TAGGCTTAGG Num.seqs=5 Similarity=0.844444  
 11 AG-GCTT-AGGCTT  
 WB235\_1:2276437-2276626 Satlength=190 Nr of Repeats=5 RepeatLength=12  
 seed=AGGCTTAGGC Num.seqs=3 Similarity=0.703704  
 12 AG-GCTT-AGGCTT  
 Rev.of\_WB235\_1:2370746-2370842 Satlength=97 Nr of Repeats=6  
 RepeatLength=12 seed=AAGCCTAAGC Num.seqs=4 Similarity=0.839744  
 12 AG-GCTT-AGGCTT  
 WB235\_1:2840215-2840304 Satlength=90 Nr of Repeats=5 RepeatLength=12  
 seed=TAGGCTTAGG Num.seqs=4 Similarity=0.833333  
 11 AG-GCTT-AGGCTT  
 Rev.of\_WB235\_1:3115944-3116232 Satlength=289 Nr of Repeats=21  
 RepeatLength=12 seed=CTAAGCCTAA Num.seqs=15 Similarity=0.766138  
 2 AG-GCTT-AGGCTT  
 WB235\_1:3280164-3280242 Satlength=79 Nr of Repeats=6 RepeatLength=12  
 seed=AGGCTTAGGC Num.seqs=5 Similarity=0.888889  
 12 AG-GCTT-AGGCTT  
 WB235\_1:3384983-3385061 Satlength=79 Nr of Repeats=6 RepeatLength=12  
 seed=GGCTTAGGCT Num.seqs=5 Similarity=0.788889  
 13 AG-GCTT-AGGCTT  
 WB235\_1:10404549-10404632 Satlength=84 Nr of Repeats=6 RepeatLength=12  
 seed=TAGGCTTAGG Num.seqs=4 Similarity=0.777778  
 11 AG-GCTT-AGGCTT  
 Rev.of\_WB235\_1:11450427-11450505 Satlength=79 Nr of Repeats=6  
 RepeatLength=12 seed=AAGCCTAAGC Num.seqs=5 Similarity=1.000000  
 12 AG-GCTT-AGGCTT  
 WB235\_1:11451202-11451316 Satlength=115 Nr of Repeats=9 RepeatLength=12  
 seed=GCTTAGGCTT Num.seqs=8 Similarity=0.813492  
 2 AG-GCTT-AGGCTT  
 WB235\_1:11470915-11470999 Satlength=85 Nr of Repeats=7 RepeatLength=12  
 seed=GGCTTAGGCT Num.seqs=7 Similarity=0.968254  
 13 AG-GCTT-AGGCTT  
 WB235\_1:11933362-11933554 Satlength=193 Nr of Repeats=15 RepeatLength=12  
 seed=TTAGGCTTAG Num.seqs=11 Similarity=0.838695  
 10 AG-GCTT-AGGCTT  
 Rev.of\_WB235\_1:12119896-12120034 Satlength=139 Nr of Repeats=10  
 RepeatLength=12 seed=TAAGCCTAAG Num.seqs=6 Similarity=0.859259  
 13 AG-GCTT-AGGCTT  
 Rev.of\_WB235\_1:12223508-12223556 Satlength=49 Nr of Repeats=4  
 RepeatLength=12 seed=GCCTAAGCCT Num.seqs=4 Similarity=0.796296  
 10 AG-GCTT-AGGCTT

Rev.of\_WB235\_1:13927845-13927905 Satlength=61 Nr of Repeats=5  
 RepeatLength=12 seed=GCCTAAGCCT Num.seqs=5 Similarity=0.866667  
 10 AG-GCTT-AGGCTT  
 WB235\_1:15072265-15072421 Satlength=157 Nr of Repeats=13 RepeatLength=12  
 seed=TTAGGCTTAG Num.seqs=13 Similarity=0.982906  
 10 AG-GCTT-AGGCTT  
 Rev.of\_WB235\_2:0-161 Satlength=162 Nr of Repeats=13 RepeatLength=12  
 seed=CCTAAGCCTA Num.seqs=12 Similarity=1.000000  
 9 AG-GCTT-AGGCTT  
 WB235\_2:573638-573888 Satlength=251 Nr of Repeats=20 RepeatLength=12  
 seed=TAGGCTTAGG Num.seqs=18 Similarity=0.816993  
 11 AG-GCTT-AGGCTT  
 WB235\_2:2550207-2550279 Satlength=73 Nr of Repeats=6 RepeatLength=12  
 seed=TTAGGCTTAG Num.seqs=6 Similarity=0.785185  
 10 AG-GCTT-AGGCTT  
 Rev.of\_WB235\_2:2633519-2633585 Satlength=67 Nr of Repeats=5  
 RepeatLength=12 seed=CCTAAGCCTA Num.seqs=4 Similarity=0.833333  
 9 AG-GCTT-AGGCTT  
 Rev.of\_WB235\_2:2731022-2731082 Satlength=61 Nr of Repeats=4  
 RepeatLength=12 seed=GCCTAAGCCT Num.seqs=3 Similarity=0.777778  
 10 AG-GCTT-AGGCTT  
 WB235\_2:3136277-3136467 Satlength=191 Nr of Repeats=8 RepeatLength=12  
 seed=GGCTTAGGCT Num.seqs=6 Similarity=0.785185  
 13 AG-GCTT-AGGCTT  
 WB235\_2:4081925-4082141 Satlength=217 Nr of Repeats=14 RepeatLength=12  
 seed=CTTAGGCTTA Num.seqs=10 Similarity=0.748148  
 9 AG-GCTT-AGGCTT  
 Rev.of\_WB235\_2:4312357-4312429 Satlength=73 Nr of Repeats=4  
 RepeatLength=12 seed=AGCCTAAGCC Num.seqs=3 Similarity=0.851852  
 11 AG-GCTT-AGGCTT  
 WB235\_2:11733044-11733122 Satlength=79 Nr of Repeats=6 RepeatLength=12  
 seed=CTTAGGCTTA Num.seqs=5 Similarity=0.844444  
 9 AG-GCTT-AGGCTT  
 WB235\_2:11905368-11905475 Satlength=108 Nr of Repeats=8 RepeatLength=12  
 seed=AGGCTTAGGC Num.seqs=6 Similarity=0.748148  
 12 AG-GCTT-AGGCTT  
 Rev.of\_WB235\_2:11930277-11930409 Satlength=133 Nr of Repeats=10  
 RepeatLength=12 seed=AAGCCTAAGC Num.seqs=6 Similarity=0.792593  
 12 AG-GCTT-AGGCTT  
 WB235\_2:11932324-11932498 Satlength=175 Nr of Repeats=10 RepeatLength=12  
 seed=AGGCTTAGGC Num.seqs=6 Similarity=0.822222  
 12 AG-GCTT-AGGCTT  
 Rev.of\_WB235\_2:12247672-12247768 Satlength=97 Nr of Repeats=7  
 RepeatLength=12 seed=CCTAAGCCTA Num.seqs=5 Similarity=0.741026  
 9 AG-GCTT-AGGCTT  
 WB235\_2:12322418-12322496 Satlength=79 Nr of Repeats=5 RepeatLength=12  
 seed=TTAGGCTTAG Num.seqs=4 Similarity=0.777778  
 10 AG-GCTT-AGGCTT  
 Rev.of\_WB235\_2:12381010-12381194 Satlength=185 Nr of Repeats=13  
 RepeatLength=12 seed=AGCCTAAGCC Num.seqs=8 Similarity=0.884921  
 11 AG-GCTT-AGGCTT  
 WB235\_2:12467214-12467281 Satlength=68 Nr of Repeats=5 RepeatLength=12  
 seed=GGCTTAGGCT Num.seqs=4 Similarity=0.944444  
 13 AG-GCTT-AGGCTT

WB235\_2:13650128-13650200 Satlength=73 Nr of Repeats=6 RepeatLength=12  
 seed=TAGGCTTAGG Num.seqs=6 Similarity=0.962963  
 11 AG-GCTT-AGGCTT  
 Rev.of\_WB235\_2:13715389-13715533 Satlength=145 Nr of Repeats=10  
 RepeatLength=12 seed=GCCTAAGCCT Num.seqs=6 Similarity=0.725926  
 10 AG-GCTT-AGGCTT  
 Rev.of\_WB235\_2:13796378-13796708 Satlength=331 Nr of Repeats=23  
 RepeatLength=12 seed=GCCTAAGCCT Num.seqs=15 Similarity=0.803175  
 10 AG-GCTT-AGGCTT  
 Rev.of\_WB235\_2:13806123-13806285 Satlength=163 Nr of Repeats=10  
 RepeatLength=12 seed=GCCTAAGCCT Num.seqs=7 Similarity=0.798942  
 10 AG-GCTT-AGGCTT  
 WB235\_2:13809662-13809758 Satlength=97 Nr of Repeats=7 RepeatLength=12  
 seed=TTAGGCTTAG Num.seqs=6 Similarity=0.755556  
 10 AG-GCTT-AGGCTT  
 Rev.of\_WB235\_2:13934639-13934753 Satlength=115 Nr of Repeats=7  
 RepeatLength=12 seed=AGCCTAAGCC Num.seqs=5 Similarity=0.733333  
 11 AG-GCTT-AGGCTT  
 WB235\_2:13974202-13974430 Satlength=229 Nr of Repeats=14 RepeatLength=12  
 seed=GCTTAGGCTT Num.seqs=11 Similarity=0.711888  
 2 AG-GCTT-AGGCTT  
 WB235\_2:14006879-14006969 Satlength=91 Nr of Repeats=5 RepeatLength=12  
 seed=TAGGCTTAGG Num.seqs=3 Similarity=0.851852  
 11 AG-GCTT-AGGCTT  
 WB235\_2:14023987-14024052 Satlength=66 Nr of Repeats=4 RepeatLength=12  
 seed=TAGGCTTAGG Num.seqs=3 Similarity=0.925926  
 11 AG-GCTT-AGGCTT  
 WB235\_2:14893703-14893787 Satlength=85 Nr of Repeats=6 RepeatLength=12  
 seed=TTAGGCTTAG Num.seqs=4 Similarity=0.814815  
 10 AG-GCTT-AGGCTT  
 Rev.of\_WB235\_2:14955292-14955352 Satlength=61 Nr of Repeats=5  
 RepeatLength=12 seed=AAGCCTAAGC Num.seqs=5 Similarity=0.888889  
 12 AG-GCTT-AGGCTT  
 WB235\_2:15279229-15279409 Satlength=181 Nr of Repeats=15 RepeatLength=12  
 seed=TTAGGCTTAG Num.seqs=15 Similarity=0.970370  
 10 AG-GCTT-AGGCTT  
 Rev.of\_WB235\_3:0-119 Satlength=120 Nr of Repeats=10 RepeatLength=12  
 seed=CCTAAGCCTA Num.seqs=10 Similarity=1.000000  
 9 AG-GCTT-AGGCTT  
 Rev.of\_WB235\_3:118094-118166 Satlength=73 Nr of Repeats=5 RepeatLength=12  
 seed=GCCTAAGCCT Num.seqs=3 Similarity=0.851852  
 10 AG-GCTT-AGGCTT  
 Rev.of\_WB235\_3:209292-209524 Satlength=233 Nr of Repeats=8  
 RepeatLength=12 seed=AAGCCTAAGC Num.seqs=5 Similarity=0.822222  
 12 AG-GCTT-AGGCTT  
 Rev.of\_WB235\_3:1052407-1052587 Satlength=181 Nr of Repeats=10  
 RepeatLength=12 seed=AAGCCTAAGC Num.seqs=7 Similarity=0.841270  
 12 AG-GCTT-AGGCTT  
 Rev.of\_WB235\_3:1714052-1714520 Satlength=469 Nr of Repeats=35  
 RepeatLength=12 seed=CTAAGCCTAA Num.seqs=27 Similarity=0.758492  
 2 AG-GCTT-AGGCTT  
 WB235\_3:1964229-1964835 Satlength=607 Nr of Repeats=30 RepeatLength=12  
 seed=TAGGCTTAGG Num.seqs=18 Similarity=0.824256  
 11 AG-GCTT-AGGCTT

WB235\_3:3346751-3346936 Satlength=186 Nr of Repeats=12 RepeatLength=12  
 seed=TAGGCTTAGG Num.seqs=9 Similarity=0.901235  
 11 AG-GCTT-AGGCTT  
 Rev.of\_WB235\_3:3684600-3684680 Satlength=81 Nr of Repeats=5  
 RepeatLength=12 seed=TAAGCCTAAG Num.seqs=3 Similarity=0.777778  
 13 AG-GCTT-AGGCTT  
 WB235\_3:10924768-10924858 Satlength=91 Nr of Repeats=6 RepeatLength=12  
 seed=GGCTTAGGCT Num.seqs=5 Similarity=0.822222  
 13 AG-GCTT-AGGCTT  
 WB235\_3:10975223-10975307 Satlength=85 Nr of Repeats=5 RepeatLength=12  
 seed=GGCTTAGGCT Num.seqs=3 Similarity=0.777778  
 13 AG-GCTT-AGGCTT  
 WB235\_3:11207917-11208073 Satlength=157 Nr of Repeats=10 RepeatLength=12  
 seed=GCTTAGGCTT Num.seqs=6 Similarity=0.755556  
 2 AG-GCTT-AGGCTT  
 WB235\_3:11424870-11425146 Satlength=277 Nr of Repeats=12 RepeatLength=12  
 seed=TTAGGCTTAG Num.seqs=8 Similarity=0.916667  
 10 AG-GCTT-AGGCTT  
 WB235\_3:11475036-11475156 Satlength=121 Nr of Repeats=10 RepeatLength=12  
 seed=CTTAGGCTTA Num.seqs=8 Similarity=0.797619  
 9 AG-GCTT-AGGCTT  
 WB235\_3:11707265-11707854 Satlength=590 Nr of Repeats=30 RepeatLength=12  
 seed=GGCTTAGGCT Num.seqs=20 Similarity=0.774854  
 13 AG-GCTT-AGGCTT  
 Rev.of\_WB235\_3:11722253-11722390 Satlength=138 Nr of Repeats=8  
 RepeatLength=12 seed=TAAGCCTAAG Num.seqs=5 Similarity=0.822222  
 13 AG-GCTT-AGGCTT  
 Rev.of\_WB235\_3:11737191-11737281 Satlength=91 Nr of Repeats=6  
 RepeatLength=12 seed=CCTAAGCCTA Num.seqs=5 Similarity=0.833333  
 9 AG-GCTT-AGGCTT  
 Rev.of\_WB235\_3:11784840-11785090 Satlength=251 Nr of Repeats=9  
 RepeatLength=12 seed=TAAGCCTAAG Num.seqs=7 Similarity=0.936508  
 13 AG-GCTT-AGGCTT  
 Rev.of\_WB235\_3:12130507-12130633 Satlength=127 Nr of Repeats=9  
 RepeatLength=12 seed=TAAGCCTAAG Num.seqs=6 Similarity=0.814815  
 13 AG-GCTT-AGGCTT  
 WB235\_3:12143931-12144015 Satlength=85 Nr of Repeats=7 RepeatLength=12  
 seed=GGCTTAGGCT Num.seqs=7 Similarity=0.968254  
 13 AG-GCTT-AGGCTT  
 Rev.of\_WB235\_3:12944421-12944571 Satlength=151 Nr of Repeats=9  
 RepeatLength=12 seed=TAAGCCTAAG Num.seqs=7 Similarity=0.830688  
 13 AG-GCTT-AGGCTT  
 WB235\_3:13783590-13783788 Satlength=199 Nr of Repeats=16 RepeatLength=12  
 seed=CTTAGGCTTA Num.seqs=15 Similarity=1.000000  
 9 AG-GCTT-AGGCTT  
 Rev.of\_WB235\_4:0-137 Satlength=138 Nr of Repeats=11 RepeatLength=12  
 seed=CCTAAGCCTA Num.seqs=10 Similarity=1.000000  
 9 AG-GCTT-AGGCTT  
 WB235\_4:545946-546072 Satlength=127 Nr of Repeats=9 RepeatLength=12  
 seed=TAGGCTTAGG Num.seqs=7 Similarity=0.788360  
 11 AG-GCTT-AGGCTT  
 Rev.of\_WB235\_4:1069432-1069486 Satlength=55 Nr of Repeats=4  
 RepeatLength=12 seed=AGCCTAAGCC Num.seqs=3 Similarity=0.851852  
 11 AG-GCTT-AGGCTT

WB235\_4:1071381-1071429 Satlength=49 Nr of Repeats=4 RepeatLength=12  
 seed=AGGCTTAGGC Num.seqs=4 Similarity=0.888889  
 12 AG-GCTT-AGGCTT  
 WB235\_4:1355992-1356408 Satlength=417 Nr of Repeats=8 RepeatLength=12  
 seed=TAGGCTTAGG Num.seqs=5 Similarity=0.822222  
 11 AG-GCTT-AGGCTT  
 WB235\_4:1494116-1494472 Satlength=357 Nr of Repeats=5 RepeatLength=12  
 seed=AGGCTTAGGC Num.seqs=4 Similarity=0.740741  
 12 AG-GCTT-AGGCTT  
 WB235\_4:1628395-1628484 Satlength=90 Nr of Repeats=6 RepeatLength=12  
 seed=TTAGGCTTAG Num.seqs=4 Similarity=0.888889  
 10 AG-GCTT-AGGCTT  
 Rev.of\_WB235\_4:1689083-1689293 Satlength=211 Nr of Repeats=11  
 RepeatLength=12 seed=CTAAGCCTAA Num.seqs=7 Similarity=0.777778  
 2 AG-GCTT-AGGCTT  
 Rev.of\_WB235\_4:1752199-1752289 Satlength=91 Nr of Repeats=5  
 RepeatLength=12 seed=TAAGCCTAAG Num.seqs=4 Similarity=0.796296  
 13 AG-GCTT-AGGCTT  
 Rev.of\_WB235\_4:3166479-3166602 Satlength=124 Nr of Repeats=7  
 RepeatLength=12 seed=CCTAAGCCTA Num.seqs=5 Similarity=0.800000  
 9 AG-GCTT-AGGCTT  
 Rev.of\_WB235\_4:3991189-3991890 Satlength=702 Nr of Repeats=6  
 RepeatLength=12 seed=TAAGCCTAAG Num.seqs=4 Similarity=0.759259  
 13 AG-GCTT-AGGCTT  
 WB235\_4:17493616-17493814 Satlength=199 Nr of Repeats=16 RepeatLength=12  
 seed=GGCTTAGGCT Num.seqs=15 Similarity=1.000000  
 13 AG-GCTT-AGGCTT  
 Rev.of\_WB235\_5:6-311 Satlength=306 Nr of Repeats=25 RepeatLength=12  
 seed=TAAGCCTAAG Num.seqs=24 Similarity=0.964573  
 13 AG-GCTT-AGGCTT  
 WB235\_5:1129473-1129617 Satlength=145 Nr of Repeats=10 RepeatLength=12  
 seed=GGCTTAGGCT Num.seqs=7 Similarity=0.814815  
 13 AG-GCTT-AGGCTT  
 Rev.of\_WB235\_5:1142352-1142454 Satlength=103 Nr of Repeats=5  
 RepeatLength=12 seed=CTAAGCCTAA Num.seqs=3 Similarity=0.851852  
 2 AG-GCTT-AGGCTT  
 Rev.of\_WB235\_5:1227227-1227275 Satlength=49 Nr of Repeats=4  
 RepeatLength=12 seed=AAGCCTAAGC Num.seqs=4 Similarity=0.944444  
 12 AG-GCTT-AGGCTT  
 Rev.of\_WB235\_5:1230606-1230858 Satlength=253 Nr of Repeats=19  
 RepeatLength=12 seed=AAGCCTAAGC Num.seqs=14 Similarity=0.804640  
 12 AG-GCTT-AGGCTT  
 Rev.of\_WB235\_5:1236678-1236956 Satlength=279 Nr of Repeats=15  
 RepeatLength=12 seed=CTAAGCCTAA Num.seqs=9 Similarity=0.836420  
 2 AG-GCTT-AGGCTT  
 WB235\_5:1243605-1243701 Satlength=97 Nr of Repeats=7 RepeatLength=12  
 seed=CTTAGGCTTA Num.seqs=6 Similarity=0.822222  
 9 AG-GCTT-AGGCTT  
 Rev.of\_WB235\_5:1341430-1341604 Satlength=175 Nr of Repeats=13  
 RepeatLength=12 seed=CTAAGCCTAA Num.seqs=11 Similarity=0.826263  
 2 AG-GCTT-AGGCTT  
 Rev.of\_WB235\_5:1423375-1423735 Satlength=361 Nr of Repeats=24  
 RepeatLength=12 seed=CCTAAGCCTA Num.seqs=17 Similarity=0.861928  
 9 AG-GCTT-AGGCTT



Rev.of\_WB235\_5:1481682-1481898 Satlength=217 Nr of Repeats=10  
 RepeatLength=12 seed=AGCCTAAGCC Num.seqs=7 Similarity=0.788360  
 11 AG-GCTT-AGGCTT  
 Rev.of\_WB235\_5:2586211-2586358 Satlength=148 Nr of Repeats=6  
 RepeatLength=12 seed=CCTAAGCCTA Num.seqs=4 Similarity=0.833333  
 9 AG-GCTT-AGGCTT  
 Rev.of\_WB235\_5:2712581-2712737 Satlength=157 Nr of Repeats=13  
 RepeatLength=12 seed=CTAAGCCTAA Num.seqs=13 Similarity=0.839031  
 2 AG-GCTT-AGGCTT  
 WB235\_5:15615355-15615426 Satlength=72 Nr of Repeats=5 RepeatLength=12  
 seed=CTTAGGCTTA Num.seqs=3 Similarity=0.925926  
 9 AG-GCTT-AGGCTT  
 WB235\_5:18566411-18566663 Satlength=253 Nr of Repeats=16 RepeatLength=12  
 seed=AGGCTTAGGC Num.seqs=10 Similarity=0.935802  
 12 AG-GCTT-AGGCTT  
 Rev.of\_WB235\_5:18581399-18581759 Satlength=361 Nr of Repeats=22  
 RepeatLength=12 seed=AGCCTAAGCC Num.seqs=15 Similarity=0.860317  
 11 AG-GCTT-AGGCTT  
 Rev.of\_WB235\_5:18588013-18588271 Satlength=259 Nr of Repeats=18  
 RepeatLength=12 seed=TAAGCCTAAG Num.seqs=13 Similarity=0.874644  
 13 AG-GCTT-AGGCTT  
 Rev.of\_WB235\_5:18616302-18616398 Satlength=97 Nr of Repeats=6  
 RepeatLength=12 seed=CTAAGCCTAA Num.seqs=4 Similarity=0.888889  
 2 AG-GCTT-AGGCTT  
 Rev.of\_WB235\_5:18632668-18632722 Satlength=55 Nr of Repeats=4  
 RepeatLength=12 seed=TAAGCCTAAG Num.seqs=3 Similarity=0.851852  
 13 AG-GCTT-AGGCTT  
 WB235\_5:18639700-18639844 Satlength=145 Nr of Repeats=9 RepeatLength=12  
 seed=GCTTAGGCTT Num.seqs=6 Similarity=0.925926  
 2 AG-GCTT-AGGCTT  
 Rev.of\_WB235\_5:19232598-19232808 Satlength=211 Nr of Repeats=15  
 RepeatLength=12 seed=GCCTAAGCCT Num.seqs=11 Similarity=0.818182  
 10 AG-GCTT-AGGCTT  
 WB235\_5:19517965-19518323 Satlength=359 Nr of Repeats=22 RepeatLength=12  
 seed=CTTAGGCTTA Num.seqs=15 Similarity=0.813757  
 9 AG-GCTT-AGGCTT  
 WB235\_5:19528638-19528776 Satlength=139 Nr of Repeats=11 RepeatLength=12  
 seed=CTTAGGCTTA Num.seqs=10 Similarity=0.938272  
 9 AG-GCTT-AGGCTT  
 Rev.of\_WB235\_5:19801650-19801767 Satlength=118 Nr of Repeats=5  
 RepeatLength=12 seed=AAGCCTAAGC Num.seqs=3 Similarity=0.851852  
 12 AG-GCTT-AGGCTT  
 WB235\_5:20923994-20924168 Satlength=175 Nr of Repeats=14 RepeatLength=12  
 seed=GCTTAGGCTT Num.seqs=13 Similarity=1.000000  
 2 AG-GCTT-AGGCTT  
 Rev.of\_WB235\_6:0-251 Satlength=252 Nr of Repeats=21 RepeatLength=12  
 seed=CTAAGCCTAA Num.seqs=21 Similarity=1.000000  
 2 AG-GCTT-AGGCTT  
 WB235\_6:2563170-2563230 Satlength=61 Nr of Repeats=5 RepeatLength=12  
 seed=AGGCTTAGGC Num.seqs=5 Similarity=0.888889  
 12 AG-GCTT-AGGCTT  
 WB235\_6:17718013-17718930 Satlength=918 Nr of Repeats=12 RepeatLength=12  
 seed=TTAGGCTTAG Num.seqs=11 Similarity=0.979798  
 10 AG-GCTT-AGGCTT

WB235\_1:477877-478046 Satlength=170 Nr of Repeats=13 RepeatLength=12  
 seed=TAGGCTTAGG Num.seqs=8 Similarity=0.813492  
 11 AG-GCNT-AGGCTT  
 Rev.of\_WB235\_1:1000379-1000469 Satlength=91 Nr of Repeats=5  
 RepeatLength=12 seed=AGCCTAAGCC Num.seqs=3 Similarity=0.740741  
 11 AG-GCNT-AGGCTT  
 Rev.of\_WB235\_1:12175889-12176021 Satlength=133 Nr of Repeats=9  
 RepeatLength=12 seed=GCCTAAGCCT Num.seqs=7 Similarity=0.767196  
 10 AG-GCTT-AGGCNT  
 Rev.of\_WB235\_2:2817169-2817253 Satlength=85 Nr of Repeats=6  
 RepeatLength=12 seed=CCTAAGCCTA Num.seqs=4 Similarity=0.754274  
 21 AG-GCTT-AGGCGT  
 Rev.of\_WB235\_4:4459427-4459589 Satlength=163 Nr of Repeats=12  
 RepeatLength=12 seed=GCCTAAGCCT Num.seqs=11 Similarity=0.751515  
 22 AG-GCTT-AGGCGT  
 Rev.of\_WB235\_1:12277734-12277806 Satlength=73 Nr of Repeats=5  
 RepeatLength=12 seed=AAGCCTAAGC Num.seqs=3 Similarity=0.777778  
 12 AG-GCTT-CGGCTT  
 WB235\_2:1224948-1225028 Satlength=81 Nr of Repeats=5 RepeatLength=12  
 seed=TTAGGCTTAG Num.seqs=3 Similarity=0.925926  
 10 AG-GCTT-AGGTTT  
 WB235\_4:3608664-3608778 Satlength=115 Nr of Repeats=7 RepeatLength=12  
 seed=TTAGGCTTAG Num.seqs=5 Similarity=0.866667  
 10 AG-GCTT-AGGATT  
 WB235\_4:1632727-1632835 Satlength=109 Nr of Repeats=9 RepeatLength=12  
 seed=CTTAAGCTTA Num.seqs=9 Similarity=0.975309  
 9 AA-GCTT-AGGCTT  
 Rev.of\_WB235\_4:1890247-1890331 Satlength=85 Nr of Repeats=5  
 RepeatLength=12 seed=TAAGCCTAAG Num.seqs=3 Similarity=0.851852  
 13 AA-GCTT-AGGCTT  
 Rev.of\_WB235\_4:3455422-3455812 Satlength=391 Nr of Repeats=27  
 RepeatLength=12 seed=TAAGCCTAAG Num.seqs=21 Similarity=0.808059  
 13 AA-GCTT-AGGCTT  
 WB235\_5:365726-365780 Satlength=55 Nr of Repeats=4 RepeatLength=12  
 seed=AGGCTTAGGC Num.seqs=3 Similarity=1.000000  
 12 AG-GCTT-AGGCTA  
 Rev.of\_WB235\_2:4365202-4365284 Satlength=83 Nr of Repeats=4  
 RepeatLength=12 seed=TAAGCCTAAG Num.seqs=3 Similarity=0.925926  
 13 AG-TCTT-AGGCTT  
 WB235\_2:12239992-12240106 Satlength=115 Nr of Repeats=7 RepeatLength=12  
 seed=TTAGTCTTAG Num.seqs=5 Similarity=0.833333  
 22 AG-TCTT-AGGCTT  
 Rev.of\_WB235\_6:1509783-1509855 Satlength=73 Nr of Repeats=5  
 RepeatLength=12 seed=CTAAGCCTAA Num.seqs=4 Similarity=0.851852  
 14 AG-TCTT-TGGCTT  
 Rev.of\_WB235\_2:2632149-2632578 Satlength=430 Nr of Repeats=33  
 RepeatLength=13 seed=AGCCTAAGCT Num.seqs=33 Similarity=0.987568  
 12 AGAGCTT-AGGCTT  
 Rev.of\_WB235\_1:11984232-11984346 Satlength=115 Nr of Repeats=7  
 RepeatLength=12 seed=CTAAGCCTAA Num.seqs=5 Similarity=0.766667  
 2 AG-GTTT-AGGCTT  
 WB235\_4:13007463-13008066 Satlength=604 Nr of Repeats=12 RepeatLength=12  
 seed=GCTTGGGTTT Num.seqs=9 Similarity=0.907407  
 8 GG-GTTT-AGGCTT

WB235\_4:13007463-13008198 Satlength=736 Nr of Repeats=17 RepeatLength=12  
 seed=GCTTGGGTTT Num.seqs=11 Similarity=0.903030  
 8 GG-GTTT-AGGCTT  
 Rev.of\_WB235\_1:1653240-1653360 Satlength=121 Nr of Repeats=7  
 RepeatLength=12 seed=AGCCTAAACC Num.seqs=5 Similarity=0.702564  
 11 AG-GTTT-AGGCTC  
 WB235\_3:1256230-1256326 Satlength=97 Nr of Repeats=5 RepeatLength=12  
 seed=AGGCTTAGGC Num.seqs=3 Similarity=0.925926  
 12 AG-GCTT-AGGCTC  
 WB235\_3:1264671-1264767 Satlength=97 Nr of Repeats=5 RepeatLength=12  
 seed=AGGCTTAGGC Num.seqs=3 Similarity=0.925926  
 12 AG-GCTT-AGGCTC  
 WB235\_3:1761961-1762051 Satlength=91 Nr of Repeats=6 RepeatLength=12  
 seed=AGGCTTAGGC Num.seqs=4 Similarity=0.668803  
 12 AG-GCTT-AGGCTC  
 WB235\_5:1305908-1306004 Satlength=97 Nr of Repeats=7 RepeatLength=12  
 seed=AGGCTTAGGC Num.seqs=5 Similarity=1.000000  
 12 AG-GCTT-AGGCTC  
 Rev.of\_WB235\_5:1825303-1825405 Satlength=103 Nr of Repeats=7  
 RepeatLength=12 seed=AGCCTGAGCC Num.seqs=5 Similarity=0.955556  
 17 AG-GCTT-AGGCTC  
 WB235\_5:2394729-2394777 Satlength=49 Nr of Repeats=4 RepeatLength=12  
 seed=AGGCTTAGGC Num.seqs=4 Similarity=0.870370  
 12 AG-GCTT-AGGCTC  
 WB235\_5:2503008-2503056 Satlength=49 Nr of Repeats=4 RepeatLength=12  
 seed=AGGCTTAGGC Num.seqs=4 Similarity=0.870370  
 12 AG-GCTT-AGGCTC  
 Rev.of\_WB235\_5:18597908-18598040 Satlength=133 Nr of Repeats=9  
 RepeatLength=12 seed=AGCCTAAGCC Num.seqs=7 Similarity=0.841270  
 23 AG-GCTT-AGGCTC  
 WB235\_1:11655695-11656421 Satlength=727 Nr of Repeats=60 RepeatLength=12  
 seed=AGGCTCAGGC Num.seqs=59 Similarity=0.880322  
 18 AG-GCTC-AGGCTC  
 WB235\_2:645177-645231 Satlength=55 Nr of Repeats=4 RepeatLength=12  
 seed=GGCTCAGGCT Num.seqs=3 Similarity=1.000000  
 19 AG-GCTC-AGGCTC  
 Rev.of\_WB235\_3:1656487-1657087 Satlength=601 Nr of Repeats=50  
 RepeatLength=12 seed=TGAGCCTGAG Num.seqs=50 Similarity=0.966440  
 19 AG-GCTC-AGGCTC  
 Rev.of\_WB235\_3:11783258-11783348 Satlength=91 Nr of Repeats=4  
 RepeatLength=12 seed=AGCCTGAGCC Num.seqs=3 Similarity=0.851852  
 23 AG-GCTC-AGGCTC  
 WB235\_5:18678760-18678838 Satlength=79 Nr of Repeats=6 RepeatLength=12  
 seed=GGCTCAGGCT Num.seqs=5 Similarity=0.955556  
 19 AG-GCTC-AGGCTC  
 Rev.of\_WB235\_5:18722989-18723101 Satlength=113 Nr of Repeats=7  
 RepeatLength=12 seed=AGCCTGAGCC Num.seqs=6 Similarity=1.000000  
 23 AG-GCTC-AGGCTC  
 WB235\_5:19229130-19229634 Satlength=505 Nr of Repeats=37 RepeatLength=12  
 seed=AGGCTCAGGC Num.seqs=32 Similarity=0.903226  
 18 AG-GCTC-AGGCTC  
 WB235\_2:13353644-13353730 Satlength=87 Nr of Repeats=6 RepeatLength=12  
 seed=CTTAGGCTTA Num.seqs=4 Similarity=0.743590  
 10 AG-GCTTAAGNCTT

WB235\_4:1785293-1785383 Satlength=91 Nr of Repeats=7 RepeatLength=12  
seed=TTAGGATTAG Num.seqs=6 Similarity=0.962963  
10 AG-GATT-AGGATT  
Rev.of\_WB235\_1:11540263-11540521 Satlength=259 Nr of Repeats=16  
RepeatLength=12 seed=AAGCCAAAGC Num.seqs=13 Similarity=0.854701  
12 TG-GCTT-TGGCTT  
WB235\_2:13974189-13974267 Satlength=79 Nr of Repeats=6 RepeatLength=12  
seed=GGCTTTGGCT Num.seqs=5 Similarity=1.000000  
19 TG-GCTT-TGGCTT  
Rev.of\_WB235\_3:2456635-2456707 Satlength=73 Nr of Repeats=5  
RepeatLength=12 seed=CCAAGCCCAA Num.seqs=3 Similarity=0.851852  
20 GG-GCTT-GGGCTT  
WB235\_5:20001413-20002864 Satlength=1452 Nr of Repeats=51 RepeatLength=12  
seed=GCTTGGGCTT Num.seqs=38 Similarity=0.904694  
20 GG-GCTT-GGGCTT  
Rev.of\_WB235\_5:3767901-3768001 Satlength=101 Nr of Repeats=6  
RepeatLength=10 seed=TAGCCATGCC Num.seqs=4 Similarity=0.933333  
1 AG-GCAT--GGC-T  
Rev.of\_WB235\_1:11032650-11032782 Satlength=133 Nr of Repeats=12  
RepeatLength=11 seed=TATGCCTAGC Num.seqs=12 Similarity=1.000000  
7 AG-GCAT-AGGC-T  
Rev.of\_WB235\_2:1250454-1251360 Satlength=907 Nr of Repeats=73  
RepeatLength=12 seed=CTATGCCTAT Num.seqs=70 Similarity=0.936784  
14 AG-GCAT-AGGCAT  
Rev.of\_WB235\_2:1252963-1253498 Satlength=536 Nr of Repeats=44  
RepeatLength=12 seed=CTATGCCTAT Num.seqs=42 Similarity=0.937798  
14 AG-GCAT-AGGCAT  
Rev.of\_WB235\_2:1421457-1422023 Satlength=567 Nr of Repeats=41  
RepeatLength=12 seed=CCTATGCCTA Num.seqs=30 Similarity=0.874585  
21 AG-GCAT-AGGCAT  
WB235\_2:2957411-2957495 Satlength=85 Nr of Repeats=7 RepeatLength=12  
seed=ATAGGCATAG Num.seqs=7 Similarity=1.000000  
22 AG-GCAT-AGGCAT  
WB235\_2:14166594-14166830 Satlength=237 Nr of Repeats=18 RepeatLength=12  
seed=ATAGGCATAG Num.seqs=11 Similarity=0.834343  
22 AG-GCAT-AGGCAT  
WB235\_3:12302154-12302292 Satlength=139 Nr of Repeats=9 RepeatLength=12  
seed=TAGGCATAGG Num.seqs=6 Similarity=0.829630  
23 AG-GCAT-AGGCAT  
WB235\_4:1429990-1430044 Satlength=55 Nr of Repeats=4 RepeatLength=12  
seed=CATAGGCATA Num.seqs=3 Similarity=0.925926  
21 AG-GCAT-AGGCAT  
WB235\_6:14126276-14126426 Satlength=151 Nr of Repeats=12 RepeatLength=12  
seed=ATAGGCATAG Num.seqs=11 Similarity=0.979798  
22 AG-GCAT-AGGCAT

\*

Consensus:

AGGCTTAGGCTT

>WB235\_Fam\_3\_15\_136 Nr. of seq. 136 Alignment length(with gaps) = 15  
Alignment score = 0.942162

WB235\_1:222749-222854 Satlength=106 Nr of Repeats=5 RepeatLength=15  
 seed=AGACCCATCG Num.seqs=4 Similarity=0.911111  
 0 AGACCCATCGTGGTG  
 WB235\_1:281468-282278 Satlength=811 Nr of Repeats=52 RepeatLength=15  
 seed=TCGTGGTGAG Num.seqs=48 Similarity=0.862569  
 7 AGACCCATCGTGGTG  
 WB235\_1:689715-689895 Satlength=181 Nr of Repeats=12 RepeatLength=15  
 seed=GGTGAGACCC Num.seqs=12 Similarity=0.900337  
 11 AGACCCATCGTGGTG  
 Rev.of\_WB235\_1:4574052-4574607 Satlength=556 Nr of Repeats=34  
 RepeatLength=15 seed=GGGTCTCACC Num.seqs=31 Similarity=0.896583  
 6 AGACCCATCGTGGTG  
 WB235\_1:7868293-7868548 Satlength=256 Nr of Repeats=17 RepeatLength=15  
 seed=ACCCATCGTG Num.seqs=17 Similarity=0.847712  
 2 AGACCCATCGTGGTG  
 Rev.of\_WB235\_1:9819851-9820331 Satlength=481 Nr of Repeats=31  
 RepeatLength=15 seed=CACGATGGGT Num.seqs=30 Similarity=0.857982  
 12 AGACCCATCGTGGTG  
 WB235\_1:11144860-11145055 Satlength=196 Nr of Repeats=13 RepeatLength=15  
 seed=TCGTGGTGAG Num.seqs=13 Similarity=0.842735  
 7 AGACCCATCGTGGTG  
 WB235\_1:11480157-11480277 Satlength=121 Nr of Repeats=8 RepeatLength=15  
 seed=TCGTGGTGAG Num.seqs=8 Similarity=0.930159  
 7 AGACCCATCGTGGTG  
 Rev.of\_WB235\_2:451705-452550 Satlength=846 Nr of Repeats=32  
 RepeatLength=15 seed=TCTCACCACG Num.seqs=30 Similarity=0.884138  
 3 AGACCCATCGTGGTG  
 Rev.of\_WB235\_2:633057-633477 Satlength=421 Nr of Repeats=27  
 RepeatLength=15 seed=GGGTCTCACC Num.seqs=26 Similarity=0.898256  
 6 AGACCCATCGTGGTG  
 WB235\_2:694364-699056 Satlength=4693 Nr of Repeats=287 RepeatLength=15  
 seed=GAGACCCATC Num.seqs=267 Similarity=0.890323  
 14 AGACCCATCGTGGTG  
 WB235\_2:694391-699449 Satlength=5059 Nr of Repeats=247 RepeatLength=15  
 seed=GGTGAGACCC Num.seqs=190 Similarity=0.923290  
 11 AGACCCATCGTGGTG  
 WB235\_2:1037817-1039287 Satlength=1471 Nr of Repeats=95 RepeatLength=15  
 seed=TCGTGGTGAG Num.seqs=92 Similarity=0.911069  
 7 AGACCCATCGTGGTG  
 WB235\_2:3365918-3365978 Satlength=61 Nr of Repeats=4 RepeatLength=15  
 seed=GGTGAGACCC Num.seqs=4 Similarity=0.911111  
 11 AGACCCATCGTGGTG  
 WB235\_2:4684295-4684838 Satlength=544 Nr of Repeats=21 RepeatLength=15  
 seed=TGGTGAGACC Num.seqs=13 Similarity=0.879202  
 10 AGACCCATCGTGGTG  
 Rev.of\_WB235\_2:8460726-8460801 Satlength=76 Nr of Repeats=4  
 RepeatLength=15 seed=GGGTCTCACC Num.seqs=3 Similarity=0.822222  
 6 AGACCCATCGTGGTG  
 Rev.of\_WB235\_2:9633989-9634259 Satlength=271 Nr of Repeats=17  
 RepeatLength=15 seed=CCACGATGGG Num.seqs=16 Similarity=0.891852  
 13 AGACCCATCGTGGTG  
 WB235\_2:12649559-12650818 Satlength=1260 Nr of Repeats=83 RepeatLength=15  
 seed=TCGTGGTGAG Num.seqs=82 Similarity=0.874683  
 7 AGACCCATCGTGGTG

WB235\_2:12649559-12651613 Satlength=2055 Nr of Repeats=136  
 RepeatLength=15 seed=TCGTGGTGAG Num.seqs=133 Similarity=0.866505  
 7 AGACCCATCGTGGTG  
 WB235\_2:14836705-14836840 Satlength=136 Nr of Repeats=9 RepeatLength=15  
 seed=AGACCCATCG Num.seqs=9 Similarity=0.881481  
 0 AGACCCATCGTGGTG  
 Rev.of\_WB235\_2:14878607-14878727 Satlength=121 Nr of Repeats=7  
 RepeatLength=15 seed=CCACGATGGG Num.seqs=6 Similarity=0.881481  
 13 AGACCCATCGTGGTG  
 Rev.of\_WB235\_3:2502140-2502620 Satlength=481 Nr of Repeats=29  
 RepeatLength=15 seed=GGTCTCACCA Num.seqs=26 Similarity=0.920957  
 5 AGACCCATCGTGGTG  
 WB235\_3:3896301-3896751 Satlength=451 Nr of Repeats=30 RepeatLength=15  
 seed=CGTGGTGAGA Num.seqs=30 Similarity=0.932158  
 8 AGACCCATCGTGGTG  
 Rev.of\_WB235\_3:13448299-13448524 Satlength=226 Nr of Repeats=15  
 RepeatLength=15 seed=CCACGATGGG Num.seqs=15 Similarity=0.930582  
 13 AGACCCATCGTGGTG  
 WB235\_3:13750231-13751043 Satlength=813 Nr of Repeats=52 RepeatLength=15  
 seed=GTGGTGAGAC Num.seqs=46 Similarity=0.862158  
 9 AGACCCATCGTGGTG  
 WB235\_3:13753764-13754664 Satlength=901 Nr of Repeats=60 RepeatLength=15  
 seed=TCGTGGTGAG Num.seqs=60 Similarity=0.880778  
 7 AGACCCATCGTGGTG  
 WB235\_4:281265-281745 Satlength=481 Nr of Repeats=32 RepeatLength=15  
 seed=TCGTGGTGAG Num.seqs=32 Similarity=0.882258  
 7 AGACCCATCGTGGTG  
 Rev.of\_WB235\_4:1154252-1154492 Satlength=241 Nr of Repeats=16  
 RepeatLength=15 seed=GGTCTCACCA Num.seqs=16 Similarity=0.880741  
 5 AGACCCATCGTGGTG  
 WB235\_4:1440391-1440556 Satlength=166 Nr of Repeats=11 RepeatLength=15  
 seed=AGACCCATCG Num.seqs=11 Similarity=0.880404  
 0 AGACCCATCGTGGTG  
 Rev.of\_WB235\_4:2096897-2096972 Satlength=76 Nr of Repeats=5  
 RepeatLength=15 seed=GGGTCTCACC Num.seqs=5 Similarity=0.840000  
 6 AGACCCATCGTGGTG  
 Rev.of\_WB235\_4:2244962-2245187 Satlength=226 Nr of Repeats=15  
 RepeatLength=15 seed=CGATGGGTCT Num.seqs=15 Similarity=0.914497  
 10 AGACCCATCGTGGTG  
 Rev.of\_WB235\_4:3052982-3053132 Satlength=151 Nr of Repeats=8  
 RepeatLength=15 seed=CACGATGGGT Num.seqs=7 Similarity=0.843386  
 12 AGACCCATCGTGGTG  
 WB235\_4:3670737-3670797 Satlength=61 Nr of Repeats=4 RepeatLength=15  
 seed=TCGTGGTGAG Num.seqs=4 Similarity=0.940741  
 7 AGACCCATCGTGGTG  
 WB235\_4:4898047-4898612 Satlength=566 Nr of Repeats=18 RepeatLength=15  
 seed=GAGACCCATC Num.seqs=15 Similarity=0.903492  
 14 AGACCCATCGTGGTG  
 Rev.of\_WB235\_4:4921570-4922365 Satlength=796 Nr of Repeats=47  
 RepeatLength=15 seed=GGGTCTCACC Num.seqs=41 Similarity=0.943631  
 6 AGACCCATCGTGGTG  
 Rev.of\_WB235\_4:4923839-4924634 Satlength=796 Nr of Repeats=47  
 RepeatLength=15 seed=GGGTCTCACC Num.seqs=41 Similarity=0.943631  
 6 AGACCCATCGTGGTG

Rev.of\_WB235\_4:4926108-4926918 Satlength=811 Nr of Repeats=48  
 RepeatLength=15 seed=GGGTCTCACC Num.seqs=42 Similarity=0.944767  
 6 AGACCCATCGTGGTG  
 Rev.of\_WB235\_4:5456641-5456776 Satlength=136 Nr of Repeats=9  
 RepeatLength=15 seed=CCACGATGGG Num.seqs=7 Similarity=0.898413  
 13 AGACCCATCGTGGTG  
 Rev.of\_WB235\_4:8073709-8073979 Satlength=271 Nr of Repeats=18  
 RepeatLength=15 seed=CTCACCACGA Num.seqs=18 Similarity=0.902977  
 2 AGACCCATCGTGGTG  
 Rev.of\_WB235\_4:8469615-8470279 Satlength=665 Nr of Repeats=41  
 RepeatLength=15 seed=TCTCACCACG Num.seqs=39 Similarity=0.951297  
 3 AGACCCATCGTGGTG  
 Rev.of\_WB235\_4:9066182-9067563 Satlength=1382 Nr of Repeats=81  
 RepeatLength=15 seed=CTCACCACGA Num.seqs=60 Similarity=0.961833  
 2 AGACCCATCGTGGTG  
 Rev.of\_WB235\_4:9410150-9411415 Satlength=1266 Nr of Repeats=46  
 RepeatLength=15 seed=ACGATGGGTC Num.seqs=43 Similarity=0.911013  
 11 AGACCCATCGTGGTG  
 WB235\_4:10262913-10263301 Satlength=389 Nr of Repeats=26 RepeatLength=15  
 seed=GACCCATCGT Num.seqs=25 Similarity=0.898074  
 1 AGACCCATCGTGGTG  
 WB235\_4:13462457-13462800 Satlength=344 Nr of Repeats=22 RepeatLength=15  
 seed=ACCCATCGTG Num.seqs=19 Similarity=0.894997  
 2 AGACCCATCGTGGTG  
 Rev.of\_WB235\_4:13884400-13884820 Satlength=421 Nr of Repeats=24  
 RepeatLength=15 seed=ACGATGGGTC Num.seqs=21 Similarity=0.916191  
 11 AGACCCATCGTGGTG  
 WB235\_4:13922430-13922519 Satlength=90 Nr of Repeats=6 RepeatLength=15  
 seed=ACCCATCGTG Num.seqs=5 Similarity=0.946667  
 2 AGACCCATCGTGGTG  
 WB235\_4:14476805-14480237 Satlength=3433 Nr of Repeats=67 RepeatLength=15  
 seed=CGTGGTGAGA Num.seqs=53 Similarity=0.889437  
 8 AGACCCATCGTGGTG  
 WB235\_4:15188409-15188529 Satlength=121 Nr of Repeats=8 RepeatLength=15  
 seed=GGTGAGACCC Num.seqs=8 Similarity=0.926984  
 11 AGACCCATCGTGGTG  
 WB235\_4:15319979-15320069 Satlength=91 Nr of Repeats=6 RepeatLength=15  
 seed=TCGTGGTGAG Num.seqs=6 Similarity=0.887407  
 7 AGACCCATCGTGGTG  
 Rev.of\_WB235\_4:15375074-15376143 Satlength=1070 Nr of Repeats=51  
 RepeatLength=15 seed=CCACGATGGG Num.seqs=44 Similarity=0.911299  
 13 AGACCCATCGTGGTG  
 Rev.of\_WB235\_4:15766277-15766397 Satlength=121 Nr of Repeats=8  
 RepeatLength=15 seed=GGGTCTCACC Num.seqs=8 Similarity=0.939683  
 6 AGACCCATCGTGGTG  
 Rev.of\_WB235\_4:15766300-15766555 Satlength=256 Nr of Repeats=17  
 RepeatLength=15 seed=CCACGATGGG Num.seqs=17 Similarity=0.875163  
 13 AGACCCATCGTGGTG  
 WB235\_4:15826645-15826960 Satlength=316 Nr of Repeats=21 RepeatLength=15  
 seed=CCCATCGTGG Num.seqs=21 Similarity=0.916191  
 3 AGACCCATCGTGGTG  
 Rev.of\_WB235\_4:15971205-15972491 Satlength=1287 Nr of Repeats=15  
 RepeatLength=15 seed=CACGATGGGT Num.seqs=13 Similarity=0.863248  
 12 AGACCCATCGTGGTG

Rev.of\_WB235\_4:16458853-16459033 Satlength=181 Nr of Repeats=10  
 RepeatLength=15 seed=TGGGTCTCAC Num.seqs=8 Similarity=0.895238  
 7 AGACCCATCGTGGTG  
 WB235\_4:16880641-16880761 Satlength=121 Nr of Repeats=8 RepeatLength=15  
 seed=TCGTGGTGAG Num.seqs=8 Similarity=0.866667  
 7 AGACCCATCGTGGTG  
 WB235\_4:16910542-16910677 Satlength=136 Nr of Repeats=9 RepeatLength=15  
 seed=TCGTGGTGAG Num.seqs=9 Similarity=0.980247  
 7 AGACCCATCGTGGTG  
 WB235\_4:17140454-17141354 Satlength=901 Nr of Repeats=60 RepeatLength=15  
 seed=ACCCATCGTG Num.seqs=60 Similarity=0.889768  
 2 AGACCCATCGTGGTG  
 Rev.of\_WB235\_4:17147999-17148449 Satlength=451 Nr of Repeats=28  
 RepeatLength=15 seed=TCTCACCACG Num.seqs=25 Similarity=0.847111  
 3 AGACCCATCGTGGTG  
 Rev.of\_WB235\_5:1403881-1404196 Satlength=316 Nr of Repeats=21  
 RepeatLength=15 seed=CGATGGGTCT Num.seqs=21 Similarity=0.927196  
 10 AGACCCATCGTGGTG  
 Rev.of\_WB235\_5:2676568-2676778 Satlength=211 Nr of Repeats=14  
 RepeatLength=15 seed=CTCACCACGA Num.seqs=14 Similarity=0.840316  
 2 AGACCCATCGTGGTG  
 WB235\_5:3621266-3621341 Satlength=76 Nr of Repeats=5 RepeatLength=15  
 seed=CGTGGTGAGA Num.seqs=5 Similarity=0.840000  
 8 AGACCCATCGTGGTG  
 Rev.of\_WB235\_5:5010548-5010653 Satlength=106 Nr of Repeats=7  
 RepeatLength=15 seed=GGGTCTCACC Num.seqs=7 Similarity=0.898413  
 6 AGACCCATCGTGGTG  
 WB235\_5:6071658-6071958 Satlength=301 Nr of Repeats=20 RepeatLength=15  
 seed=ACCCATCGTG Num.seqs=20 Similarity=0.901287  
 2 AGACCCATCGTGGTG  
 WB235\_5:6091617-6091992 Satlength=376 Nr of Repeats=25 RepeatLength=15  
 seed=CCCATCGTGG Num.seqs=25 Similarity=0.889185  
 3 AGACCCATCGTGGTG  
 Rev.of\_WB235\_5:6299893-6299998 Satlength=106 Nr of Repeats=7  
 RepeatLength=15 seed=GGGTCTCACC Num.seqs=7 Similarity=0.881481  
 6 AGACCCATCGTGGTG  
 WB235\_5:6587809-6587899 Satlength=91 Nr of Repeats=6 RepeatLength=15  
 seed=GGTGAGACCC Num.seqs=6 Similarity=0.917037  
 11 AGACCCATCGTGGTG  
 Rev.of\_WB235\_5:7914059-7914224 Satlength=166 Nr of Repeats=11  
 RepeatLength=15 seed=CCACGATGGG Num.seqs=11 Similarity=0.877172  
 13 AGACCCATCGTGGTG  
 WB235\_5:7915927-7916107 Satlength=181 Nr of Repeats=11 RepeatLength=15  
 seed=ACCCATCGTG Num.seqs=10 Similarity=0.907161  
 2 AGACCCATCGTGGTG  
 Rev.of\_WB235\_5:8316057-8316570 Satlength=514 Nr of Repeats=17  
 RepeatLength=15 seed=GGGTCTCACC Num.seqs=16 Similarity=0.932593  
 6 AGACCCATCGTGGTG  
 Rev.of\_WB235\_5:9439276-9439441 Satlength=166 Nr of Repeats=11  
 RepeatLength=15 seed=CGATGGGTCT Num.seqs=11 Similarity=0.899798  
 10 AGACCCATCGTGGTG  
 Rev.of\_WB235\_5:15295547-15296333 Satlength=787 Nr of Repeats=8  
 RepeatLength=15 seed=TCTCACCACG Num.seqs=7 Similarity=0.923810  
 3 AGACCCATCGTGGTG



Rev.of\_WB235\_5:15321484-15322280 Satlength=797 Nr of Repeats=53  
 RepeatLength=15 seed=CCACGATGGG Num.seqs=50 Similarity=0.875935  
 13 AGACCCATCGTGGTG  
 WB235\_5:15582778-15582853 Satlength=76 Nr of Repeats=5 RepeatLength=15  
 seed=AGACCCATCG Num.seqs=5 Similarity=0.928889  
 0 AGACCCATCGTGGTG  
 Rev.of\_WB235\_6:161586-161691 Satlength=106 Nr of Repeats=7  
 RepeatLength=15 seed=GTCTCACCAC Num.seqs=7 Similarity=0.932275  
 4 AGACCCATCGTGGTG  
 Rev.of\_WB235\_6:169222-169627 Satlength=406 Nr of Repeats=27  
 RepeatLength=15 seed=ACGATGGGTC Num.seqs=27 Similarity=0.913897  
 11 AGACCCATCGTGGTG  
 Rev.of\_WB235\_6:943488-943966 Satlength=479 Nr of Repeats=11  
 RepeatLength=15 seed=CACGATGGGT Num.seqs=10 Similarity=0.887407  
 12 AGACCCATCGTGGTG  
 Rev.of\_WB235\_6:1376205-1376549 Satlength=345 Nr of Repeats=23  
 RepeatLength=15 seed=CGATGGGTCT Num.seqs=22 Similarity=0.845695  
 10 AGACCCATCGTGGTG  
 Rev.of\_WB235\_6:3075483-3075588 Satlength=106 Nr of Repeats=7  
 RepeatLength=15 seed=TCACCACGAT Num.seqs=7 Similarity=0.923810  
 1 AGACCCATCGTGGTG  
 WB235\_6:5227815-5227935 Satlength=121 Nr of Repeats=8 RepeatLength=15  
 seed=TGGTGAGACC Num.seqs=8 Similarity=0.860317  
 10 AGACCCATCGTGGTG  
 Rev.of\_WB235\_6:15635841-15636081 Satlength=241 Nr of Repeats=15  
 RepeatLength=15 seed=GGGTCTCACC Num.seqs=14 Similarity=0.906227  
 6 AGACCCATCGTGGTG  
 Rev.of\_WB235\_6:16852072-16852162 Satlength=91 Nr of Repeats=6  
 RepeatLength=15 seed=GGGTCTCACC Num.seqs=6 Similarity=0.922963  
 6 AGACCCATCGTGGTG  
 Rev.of\_WB235\_2:15138506-15140272 Satlength=1767 Nr of Repeats=38  
 RepeatLength=15 seed=GGGTCTCACC Num.seqs=35 Similarity=0.915593  
 6 AGACCCNTCGTGGTG  
 WB235\_5:16273937-16274402 Satlength=466 Nr of Repeats=31 RepeatLength=15  
 seed=TGGTGAGACC Num.seqs=31 Similarity=0.865806  
 10 AGACCCNTCGTGGTG  
 Rev.of\_WB235\_6:12521171-12522034 Satlength=864 Nr of Repeats=10  
 RepeatLength=15 seed=GGGTCTCACC Num.seqs=9 Similarity=0.920988  
 6 AGACCCNTCGTGGTG  
 WB235\_1:6647571-6647736 Satlength=166 Nr of Repeats=11 RepeatLength=15  
 seed=GAGACCCATC Num.seqs=11 Similarity=0.883636  
 14 AGACCCATCGTGGCG  
 Rev.of\_WB235\_2:857683-857758 Satlength=76 Nr of Repeats=5 RepeatLength=15  
 seed=ATGGGTCTCG Num.seqs=3 Similarity=1.000000  
 23 AGACCCATCGTGGCG  
 WB235\_2:2002012-2002087 Satlength=76 Nr of Repeats=5 RepeatLength=15  
 seed=TCGTGGCGAG Num.seqs=5 Similarity=0.928889  
 22 AGACCCATCGTGGCG  
 WB235\_2:2386288-2386363 Satlength=76 Nr of Repeats=5 RepeatLength=15  
 seed=TCGTGGCGAG Num.seqs=5 Similarity=0.928889  
 22 AGACCCATCGTGGCG  
 WB235\_2:4684299-4684389 Satlength=91 Nr of Repeats=6 RepeatLength=15  
 seed=GAGACCCATC Num.seqs=6 Similarity=0.899259  
 14 AGACCCATCGTGGCG

WB235\_2:14991646-14991736 Satlength=91 Nr of Repeats=6 RepeatLength=15  
 seed=TCGTGGCGAG Num.seqs=6 Similarity=0.940741  
 22 AGACCCATCGTGGCG  
 WB235\_2:15000612-15000786 Satlength=175 Nr of Repeats=9 RepeatLength=15  
 seed=AGACCCATCG Num.seqs=8 Similarity=0.895238  
 15 AGACCCATCGTGGCG  
 WB235\_3:8335590-8336085 Satlength=496 Nr of Repeats=32 RepeatLength=15  
 seed=ACCCATCGTG Num.seqs=31 Similarity=0.914170  
 17 AGACCCATCGTGGCG  
 WB235\_4:13846283-13847033 Satlength=751 Nr of Repeats=45 RepeatLength=15  
 seed=CCCATCGTGG Num.seqs=40 Similarity=0.901766  
 18 AGACCCATCGTGGCG  
 WB235\_4:15166280-15166460 Satlength=181 Nr of Repeats=11 RepeatLength=15  
 seed=GAGACCCATC Num.seqs=10 Similarity=0.917037  
 14 AGACCCATCGTGGCG  
 Rev.of\_WB235\_6:9607653-9607728 Satlength=76 Nr of Repeats=5  
 RepeatLength=15 seed=ATGGGTCTCG Num.seqs=3 Similarity=1.000000  
 23 AGACCCATCGTGGCG  
 WB235\_6:14362236-14362311 Satlength=76 Nr of Repeats=5 RepeatLength=15  
 seed=TCGTGGCGAG Num.seqs=5 Similarity=0.928889  
 22 AGACCCATCGTGGCG  
 WB235\_6:17311002-17311107 Satlength=106 Nr of Repeats=7 RepeatLength=15  
 seed=GAGACCCATC Num.seqs=7 Similarity=0.847619  
 14 AGACCCATCGTGGCG  
 Rev.of\_WB235\_4:1345560-1345725 Satlength=166 Nr of Repeats=11  
 RepeatLength=15 seed=CCACGATGGG Num.seqs=11 Similarity=0.880404  
 28 AGACCCATCGTGGNG  
 Rev.of\_WB235\_4:13464499-13464709 Satlength=211 Nr of Repeats=14  
 RepeatLength=15 seed=CCACGATGGG Num.seqs=14 Similarity=0.902320  
 28 AGACCCATCGTGGNG  
 WB235\_4:14476813-14476978 Satlength=166 Nr of Repeats=11 RepeatLength=15  
 seed=GACCCATCGT Num.seqs=11 Similarity=0.878788  
 16 AGACCCATCGTGGNG  
 Rev.of\_WB235\_6:516173-516819 Satlength=647 Nr of Repeats=15  
 RepeatLength=15 seed=CCACGATGGG Num.seqs=14 Similarity=0.873016  
 28 AGACCCATCGTGGNG  
 Rev.of\_WB235\_6:5229858-5230323 Satlength=466 Nr of Repeats=31  
 RepeatLength=15 seed=CCACGATGGG Num.seqs=27 Similarity=0.802469  
 28 AGACCCATCGTGGNG  
 Rev.of\_WB235\_1:14668547-14668607 Satlength=61 Nr of Repeats=4  
 RepeatLength=15 seed=CCACGATGGG Num.seqs=4 Similarity=0.881481  
 28 AGACCCATCGTGGAG  
 Rev.of\_WB235\_1:3389969-3393329 Satlength=3361 Nr of Repeats=224  
 RepeatLength=15 seed=CTCACCACGA Num.seqs=206 Similarity=0.875278  
 2 AGACCCTTCGTGGTG  
 WB235\_1:3980324-3980429 Satlength=106 Nr of Repeats=7 RepeatLength=15  
 seed=TCGTGGTGAG Num.seqs=7 Similarity=0.949206  
 7 AGACCCTTCGTGGTG  
 WB235\_1:5144853-5145677 Satlength=825 Nr of Repeats=51 RepeatLength=15  
 seed=CGTGGTGAGA Num.seqs=47 Similarity=0.827485  
 8 AGACCCTTCGTGGTG  
 WB235\_1:7740676-7740751 Satlength=76 Nr of Repeats=5 RepeatLength=15  
 seed=TCGTGGTGAG Num.seqs=5 Similarity=0.911111  
 7 AGACCCTTCGTGGTG

WB235\_2:1034465-1036445 Satlength=1981 Nr of Repeats=125 RepeatLength=15  
 seed=TCGTGGTGAG Num.seqs=119 Similarity=0.915200  
 7 AGACCCTTCGTGGTG  
 Rev.of\_WB235\_2:4260577-4261267 Satlength=691 Nr of Repeats=40  
 RepeatLength=15 seed=GTCTCACCAC Num.seqs=34 Similarity=0.828821  
 4 AGACCCTTCGTGGTG  
 WB235\_2:9202102-9202507 Satlength=406 Nr of Repeats=27 RepeatLength=15  
 seed=TGGTGAGACC Num.seqs=25 Similarity=0.902519  
 10 AGACCCTTCGTGGTG  
 WB235\_2:14993591-14993681 Satlength=91 Nr of Repeats=6 RepeatLength=15  
 seed=GGTGAGACCC Num.seqs=6 Similarity=0.905185  
 11 AGACCCTTCGTGGTG  
 WB235\_3:1320777-1320837 Satlength=61 Nr of Repeats=4 RepeatLength=15  
 seed=TCGTGGTGAG Num.seqs=4 Similarity=0.955556  
 7 AGACCCTTCGTGGTG  
 WB235\_3:3446010-3446749 Satlength=740 Nr of Repeats=47 RepeatLength=15  
 seed=GTGGTGAGAC Num.seqs=44 Similarity=0.837350  
 9 AGACCCTTCGTGGTG  
 Rev.of\_WB235\_4:1477450-1477555 Satlength=106 Nr of Repeats=7  
 RepeatLength=15 seed=CTCACCACGA Num.seqs=7 Similarity=0.873016  
 2 AGACCCTTCGTGGTG  
 Rev.of\_WB235\_4:14218012-14218147 Satlength=136 Nr of Repeats=9  
 RepeatLength=15 seed=GGGTCTCACC Num.seqs=9 Similarity=0.930864  
 6 AGACCCTTCGTGGTG  
 Rev.of\_WB235\_4:15060108-15060798 Satlength=691 Nr of Repeats=39  
 RepeatLength=15 seed=GGTCTACCA Num.seqs=32 Similarity=0.917921  
 5 AGACCCTTCGTGGTG  
 Rev.of\_WB235\_4:16128108-16129641 Satlength=1534 Nr of Repeats=16  
 RepeatLength=15 seed=GGGTCTCACC Num.seqs=11 Similarity=0.935354  
 6 AGACCCTTCGTGGTG  
 WB235\_4:16153344-16153449 Satlength=106 Nr of Repeats=7 RepeatLength=15  
 seed=GTGGTGAGAC Num.seqs=7 Similarity=0.898413  
 9 AGACCCTTCGTGGTG  
 Rev.of\_WB235\_4:16223761-16224157 Satlength=397 Nr of Repeats=25  
 RepeatLength=15 seed=TCTCACCACG Num.seqs=21 Similarity=0.820106  
 3 AGACCCTTCGTGGTG  
 WB235\_5:1254384-1254459 Satlength=76 Nr of Repeats=5 RepeatLength=15  
 seed=TCGTGGTGAG Num.seqs=5 Similarity=0.911111  
 7 AGACCCTTCGTGGTG  
 WB235\_5:1254384-1256245 Satlength=1862 Nr of Repeats=31 RepeatLength=15  
 seed=TCGTGGTGAG Num.seqs=29 Similarity=0.903667  
 7 AGACCCTTCGTGGTG  
 WB235\_5:1254387-1257024 Satlength=2638 Nr of Repeats=44 RepeatLength=15  
 seed=TGGTGAGACC Num.seqs=41 Similarity=0.901138  
 10 AGACCCTTCGTGGTG  
 WB235\_5:5005844-5006744 Satlength=901 Nr of Repeats=59 RepeatLength=15  
 seed=TCGTGGTGAG Num.seqs=50 Similarity=0.805823  
 7 AGACCCTTCGTGGTG  
 WB235\_5:5640056-5640116 Satlength=61 Nr of Repeats=4 RepeatLength=15  
 seed=CGTGGTGAGA Num.seqs=4 Similarity=0.911111  
 8 AGACCCTTCGTGGTG  
 Rev.of\_WB235\_5:7720637-7720787 Satlength=151 Nr of Repeats=10  
 RepeatLength=15 seed=GGGTCTCACC Num.seqs=10 Similarity=0.934815  
 6 AGACCCTTCGTGGTG

WB235\_5:9601934-9602249 Satlength=316 Nr of Repeats=21 RepeatLength=15  
seed=GGTGAGACCC Num.seqs=21 Similarity=0.928889  
11 AGACCCCTTCGTGGTG  
WB235\_5:13882296-13882386 Satlength=91 Nr of Repeats=6 RepeatLength=15  
seed=TCGTGGTGAG Num.seqs=6 Similarity=0.857778  
7 AGACCCCTTCGTGGTG  
WB235\_5:14124319-14124409 Satlength=91 Nr of Repeats=6 RepeatLength=15  
seed=CGTGGTGAGA Num.seqs=6 Similarity=0.893333  
8 AGACCCCTTCGTGGTG  
Rev.of\_WB235\_5:14156207-14156297 Satlength=91 Nr of Repeats=6  
RepeatLength=15 seed=GGGTCTCACC Num.seqs=6 Similarity=0.917037  
6 AGACCCCTTCGTGGTG  
WB235\_6:13560726-13560906 Satlength=181 Nr of Repeats=11 RepeatLength=15  
seed=TCGTGGTGAG Num.seqs=10 Similarity=0.857778  
7 AGACCCCTTCGTGGTG  
Rev.of\_WB235\_6:15482468-15483998 Satlength=1531 Nr of Repeats=97  
RepeatLength=15 seed=GTCTCACCAC Num.seqs=92 Similarity=0.888135  
4 AGACCCCTTCGTGGTG  
Rev.of\_WB235\_6:16505118-16505433 Satlength=316 Nr of Repeats=18  
RepeatLength=15 seed=TCACCACGAA Num.seqs=15 Similarity=0.947513  
16 AGACCCCTTCGTGGTG  
WB235\_6:14121147-14122257 Satlength=1111 Nr of Repeats=73 RepeatLength=15  
seed=TCGTGGTGAG Num.seqs=70 Similarity=0.770484  
7 AGACCTATCGTGGTG  
WB235\_1:308028-308148 Satlength=121 Nr of Repeats=7 RepeatLength=15  
seed=GAGACCCATC Num.seqs=6 Similarity=0.764583  
14 AGACCCATCGTGACG  
WB235\_3:690245-690736 Satlength=492 Nr of Repeats=19 RepeatLength=15  
seed=TGAGACCCAT Num.seqs=13 Similarity=0.851852  
28 AGACCCATCGTGATG

\*\*\*\*\* \*  
Consensus:

AGACCCaTCGTGGTG

>WB235\_Fam\_4\_35\_115 Nr. of seq. 115 Alignment length(with gaps) = 45  
Alignment score = 0.601883  
WB235\_1:1136040-1136228 Satlength=189 Nr of Repeats=5 RepeatLength=31  
seed=ATTCCCGCCA Num.seqs=3 Similarity=0.628472  
0 ATT--CCCGCC--AATT-----TT-TT-CT-CAGGAAATTGA--  
Rev.of\_WB235\_3:1320896-1321023 Satlength=128 Nr of Repeats=4  
RepeatLength=31 seed=AATTCAAATT Num.seqs=3 Similarity=0.885305  
3 ATT--CCCGCC--AAAA-----TT-TT-TT-GAAGAAATTGA--  
WB235\_4:6664978-6665286 Satlength=309 Nr of Repeats=9 RepeatLength=31  
seed=CCCGCCAAAA Num.seqs=7 Similarity=0.897593  
3 ATT--CCCGCC--AAAA-----TT-TT-TT-GAAAAAATTGA--  
Rev.of\_WB235\_4:13478657-13478875 Satlength=219 Nr of Repeats=6  
RepeatLength=31 seed=AATTCAAATT Num.seqs=4 Similarity=0.942652  
3 ATT--CCCGCC--AAAA-----TT-TT-TT-GAGGAAATTGA--  
Rev.of\_WB235\_5:19052161-19052388 Satlength=228 Nr of Repeats=7  
RepeatLength=33 seed=GGAATTCAAA Num.seqs=5 Similarity=0.967677  
6 AT-T-CCCGCC--AAAATT---TT-TT-TT-GAATAAATTGA--

Rev.of\_WB235\_3:12141791-12142267 Satlength=477 Nr of Repeats=10  
 RepeatLength=32 seed=ATTCAAATTT Num.seqs=6 Similarity=0.602694  
 34 ATT--TTCGCC--AAAA-N---TT-TT-CT-GAAGAAATTTGA--  
 WB235\_4:17262649-17262776 Satlength=128 Nr of Repeats=4 RepeatLength=32  
 seed=GAAGAAATTT Num.seqs=3 Similarity=0.861111  
 52 ATT--TGCACC--AAAA-T---TT-TT-CT-GAAGAAATTTGA--  
 Rev.of\_WB235\_1:669658-671715 Satlength=2058 Nr of Repeats=63  
 RepeatLength=32 seed=GAATTCAAAT Num.seqs=41 Similarity=0.870732  
 4 ATT-C-CCGCC--AAAA-T---TT-TT-CT-CAGAAAATTTGA--  
 WB235\_1:1362690-1362850 Satlength=161 Nr of Repeats=5 RepeatLength=32  
 seed=TCAGAAAATT Num.seqs=5 Similarity=0.983333  
 19 ATT-C-CCGCC--AAAA-T---TT-TT-CT-CAGAAAATTTGA--  
 WB235\_4:15708521-15708971 Satlength=451 Nr of Repeats=14 RepeatLength=32  
 seed=TTGAATTCCC Num.seqs=13 Similarity=0.905983  
 28 ATT-C-CCGCC--AAAA-T---TT-TT-CA-CAGAAAATTTGA--  
 WB235\_5:4053377-4053861 Satlength=485 Nr of Repeats=15 RepeatLength=32  
 seed=TTTCACAGAA Num.seqs=11 Similarity=0.921212  
 47 ATT-C-CCGCC--AAAA-T---TT-TT-CA-CAGAAAATTTGA--  
 WB235\_6:14723633-14724049 Satlength=417 Nr of Repeats=13 RepeatLength=32  
 seed=TTGAATTCCC Num.seqs=13 Similarity=0.927885  
 28 ATT-C-CCGCC--AAAA-T---TT-TT-CA-CAGAAAATTTGA--  
 WB235\_5:19993167-19993682 Satlength=516 Nr of Repeats=14 RepeatLength=32  
 seed=AAATTTGAAT Num.seqs=9 Similarity=0.806958  
 24 ATT-T-CCGCC--AAAA-T---TT-TT-CT-CAGAAAATTTGA--  
 WB235\_1:13610087-13613799 Satlength=3713 Nr of Repeats=116  
 RepeatLength=32 seed=TGAATTCCCG Num.seqs=116 Similarity=0.922301  
 29 ATT-C-CCGCC--AAAA-T---TT-TT-CA-CAGAAAATTTGA--  
 Rev.of\_WB235\_2:4555047-4555687 Satlength=641 Nr of Repeats=20  
 RepeatLength=32 seed=CGGGAATTCA Num.seqs=20 Similarity=0.921491  
 39 ATT-C-CCGCC--AAAA-T---TT-TT-CA-CAGAAAATTTGA--  
 Rev.of\_WB235\_3:11160967-11161287 Satlength=321 Nr of Repeats=10  
 RepeatLength=32 seed=TTTCTGTGAA Num.seqs=10 Similarity=0.896296  
 58 ATT-C-CCGCC--AAAA-T---TT-TT-CA-CAGAAAATTTGA--  
 WB235\_4:8467114-8467274 Satlength=161 Nr of Repeats=5 RepeatLength=32  
 seed=TTGAATTCCC Num.seqs=5 Similarity=0.891667  
 60 ATT-C-CCGCC--AAAA-T---TT-TT-CA-CAGAAAATTTGA--  
 Rev.of\_WB235\_4:12023094-12025460 Satlength=2367 Nr of Repeats=74  
 RepeatLength=32 seed=CGGGAATTCA Num.seqs=72 Similarity=0.926774  
 39 ATT-C-CCGCC--AAAA-T---TT-TT-CA-CAGAAAATTTGA--  
 Rev.of\_WB235\_5:3520923-3521917 Satlength=995 Nr of Repeats=31  
 RepeatLength=32 seed=CGGGAATTCA Num.seqs=29 Similarity=0.920874  
 39 ATT-C-CCGCC--AAAA-T---TT-TT-CA-CAGAAAATTTGA--  
 Rev.of\_WB235\_6:9008356-9008996 Satlength=641 Nr of Repeats=20  
 RepeatLength=32 seed=CGGGAATTCA Num.seqs=20 Similarity=0.894298  
 39 ATT-C-CCGCC--AAAA-T---TT-TT-CA-CAGAAAATTTGA--  
 WB235\_6:14723638-14724190 Satlength=553 Nr of Repeats=16 RepeatLength=32  
 seed=TTCCCGCCAA Num.seqs=11 Similarity=0.947727  
 33 ATT-C-CCGCC--AAAA-T---TT-TT-CA-CAGAAAATTTGA--  
 Rev.of\_WB235\_5:6984815-6985177 Satlength=363 Nr of Repeats=11  
 RepeatLength=32 seed=AATTCAAATT Num.seqs=7 Similarity=0.908730  
 35 ATT-C-CCGCC--AAAA-T---TT-TT-CA-CAAAAAATTTGA--  
 WB235\_2:1968841-1969602 Satlength=762 Nr of Repeats=23 RepeatLength=32  
 seed=AATTCCTGCC Num.seqs=16 Similarity=0.855208  
 31 ATT-C-CCGCC--AAAA-A---TT-TT-CA-NAGAAAATTTGA--

WB235\_2:1976612-1976897 Satlength=286 Nr of Repeats=8 RepeatLength=32  
 seed=AATTCCCGCC Num.seqs=5 Similarity=0.858333  
 31 ATT-C-CCGCC--AAAA-A--TT-TT-CA-NAGAAAAATTTGA--  
 WB235\_2:1985022-1985847 Satlength=826 Nr of Repeats=25 RepeatLength=32  
 seed=AATTCCCGCC Num.seqs=18 Similarity=0.860566  
 31 ATT-C-CCGCC--AAAA-A--TT-TT-CA-NAGAAAAATTTGA--  
 Rev.of\_WB235\_2:2002110-2002460 Satlength=351 Nr of Repeats=10  
 RepeatLength=32 seed=GGCGGGAATT Num.seqs=7 Similarity=0.843675  
 41 ATT-C-CCGCC--AAAA-A--TT-TT-CA-AAGAAAAATTTGA--  
 WB235\_6:9605306-9607639 Satlength=2334 Nr of Repeats=65 RepeatLength=32  
 seed=TCCCGCCAAA Num.seqs=47 Similarity=0.846978  
 66 ATT-C-CCGCC--AAAA-A--TT-TT-CA-AAGAAAAATTTGA--  
 Rev.of\_WB235\_2:14991755-14991977 Satlength=223 Nr of Repeats=7  
 RepeatLength=32 seed=TTTTGGCGGG Num.seqs=5 Similarity=0.841667  
 45 ATT-C-CCGCC--AAAA-A--TT-TT-CA-NAGAAAAATTTGA--  
 WB235\_2:6434384-6434544 Satlength=161 Nr of Repeats=5 RepeatLength=32  
 seed=AAAAATTTTC Num.seqs=5 Similarity=0.916667  
 41 ATT-C-CCGCC--AAAA-A--TT-TT-CA-CAGAAAAATTTGA--  
 WB235\_2:6434384-6435137 Satlength=754 Nr of Repeats=6 RepeatLength=32  
 seed=AAAAATTTTC Num.seqs=5 Similarity=0.916667  
 41 ATT-C-CCGCC--AAAA-A--TT-TT-CA-CAGAAAAATTTGA--  
 WB235\_5:20471611-20471894 Satlength=284 Nr of Repeats=9 RepeatLength=32  
 seed=CCGCCAAAAT Num.seqs=7 Similarity=0.853175  
 4 ATT-C-CCGCC--AAAA-T--TT-TT-CT-TTGAAAAATTTGA--  
 WB235\_1:994259-994677 Satlength=419 Nr of Repeats=4 RepeatLength=32  
 seed=CAAAATTTT Num.seqs=3 Similarity=0.888889  
 9 A-T-CGCCGCC--AAAA-T--TT-TT-CT-CAGAAAAATTTGA--  
 Rev.of\_WB235\_5:18473949-18474108 Satlength=160 Nr of Repeats=4  
 RepeatLength=32 seed=GAATTCAAAT Num.seqs=3 Similarity=0.888889  
 4 ATT-C-ACGCC--AAAA-A--TT-TT-TT-CAGAAAAATTTGA--  
 WB235\_2:2599830-2600053 Satlength=224 Nr of Repeats=7 RepeatLength=32  
 seed=AATTCCCGCC Num.seqs=6 Similarity=0.855556  
 31 ATT-C-CCGCC--AAAA-A--AT-TT-CA-AAGAAAAATTTAA--  
 WB235\_2:2599867-2600422 Satlength=556 Nr of Repeats=7 RepeatLength=32  
 seed=CCGCCAAAAA Num.seqs=5 Similarity=0.866667  
 36 ATT-C-CCGCC--AAAA-A--AT-TT-CA-AAGAAAAATTTAA--  
 WB235\_2:13906504-13906669 Satlength=166 Nr of Repeats=5 RepeatLength=33  
 seed=AAAATTTGAA Num.seqs=5 Similarity=0.749495  
 24 ATT-TCCCGCC--AAAA-T--T-T-TT-CT-CAGAAAAATTTGA--  
 Rev.of\_WB235\_5:1368467-1368669 Satlength=203 Nr of Repeats=6  
 RepeatLength=34 seed=AAATTCAAAT Num.seqs=5 Similarity=0.823529  
 37 ATT-TCCCGCC--AAAA-T--TAT-TT-CT-CAGAAAAATTTGA--  
 WB235\_1:759087-759538 Satlength=452 Nr of Repeats=13 RepeatLength=34  
 seed=TTTCTCAGAA Num.seqs=8 Similarity=0.787245  
 50 ATT-TCCCACC--AAAA-T--TTT-TT-CT-CAGAAAAATTTGA--  
 WB235\_5:2716232-2716355 Satlength=124 Nr of Repeats=4 RepeatLength=35  
 seed=TTTCTCAGAA Num.seqs=3 Similarity=0.923810  
 51 ATT-TCCCGCC--AAAA-T-GTTT-TT-CT-CAGAAAAATTTGA--  
 WB235\_1:14257569-14258742 Satlength=1174 Nr of Repeats=31 RepeatLength=34  
 seed=AAATTTGAAT Num.seqs=19 Similarity=0.788556  
 25 ATT-TCCCGCC--AAAA-A-GT-T-TT-CT-CAGAAAAATTTGA--  
 WB235\_3:12480633-12480804 Satlength=172 Nr of Repeats=5 RepeatLength=35  
 seed=AATTTGAATT Num.seqs=3 Similarity=0.923810  
 26 ATT-TCCCGCC--AAAA-TCAT-T-TT-CT-GAGAAAAATTTGA--

WB235\_2:1793298-1793504 Satlength=207 Nr of Repeats=6 RepeatLength=34  
 seed=ATTTGAATTT Num.seqs=4 Similarity=0.980392  
 27 ATT-TCCCGCC--AAAA--TTTT-TT-CA-CTGAAAATTTGA--  
 Rev.of\_WB235\_2:1796656-1797032 Satlength=377 Nr of Repeats=11  
 RepeatLength=34 seed=CGGGAAATTC Num.seqs=9 Similarity=0.956427  
 41 ATT-TCCCGCC--AAAA--TTTT-TT-CA-CTGAAAATTTGA--  
 Rev.of\_WB235\_2:14993697-14994076 Satlength=380 Nr of Repeats=11  
 RepeatLength=34 seed=TTGGCGGGAA Num.seqs=7 Similarity=0.880511  
 45 ATT-TCCCGCC--AAAA--TTTT-TT-CA-CTGAAAATTTGA--  
 WB235\_4:1344791-1345475 Satlength=685 Nr of Repeats=20 RepeatLength=34  
 seed=ATTTCCCGCC Num.seqs=16 Similarity=0.995098  
 33 ATT-TCCCGCC--AAAA--TTTT-TT-CA-CTGAAAATTTGA--  
 WB235\_4:1477245-1477418 Satlength=174 Nr of Repeats=5 RepeatLength=34  
 seed=GAAAATTTGA Num.seqs=3 Similarity=0.828571  
 57 ATT-TCCCGCC--AAAA--TTTT-TT-CA-CTGAAAATTTGA--  
 Rev.of\_WB235\_4:15188545-15190957 Satlength=2413 Nr of Repeats=70  
 RepeatLength=34 seed=TTGGCGGGAA Num.seqs=46 Similarity=0.965786  
 45 ATT-TCCCGCC--AAAA--TTTT-TT-CA-CTGAAAATTTGA--  
 Rev.of\_WB235\_5:10268112-10269248 Satlength=1137 Nr of Repeats=33  
 RepeatLength=34 seed=TTGGCGGGAA Num.seqs=20 Similarity=0.915765  
 45 ATT-TCCCGCC--AAAA--TTTT-TT-CA-CTGAAAATTTGA--  
 WB235\_1:1429375-1430301 Satlength=927 Nr of Repeats=24 RepeatLength=35  
 seed=AAATTTGAAT Num.seqs=15 Similarity=0.827628  
 60 ATT-TCCCGCC--AAAA-T-TTTT-TT-CA-CTGAAAATTTGA--  
 Rev.of\_WB235\_1:7740774-7741690 Satlength=917 Nr of Repeats=26  
 RepeatLength=35 seed=GCGGGAAATT Num.seqs=17 Similarity=0.870370  
 77 ATT-TCCCGCC--AAAA-T-TTTT-TT-CA-CTGAAAATTTGA--  
 Rev.of\_WB235\_1:11480313-11481528 Satlength=1216 Nr of Repeats=24  
 RepeatLength=35 seed=TGGCGGGAAA Num.seqs=17 Similarity=0.860771  
 79 ATT-TCCCGCC--AAAA-T-TTTT-TT-CA-CTGAAAATTTGA--  
 Rev.of\_WB235\_2:9202534-9203060 Satlength=527 Nr of Repeats=15  
 RepeatLength=35 seed=ATTCAAATTT Num.seqs=10 Similarity=0.900952  
 70 ATT-TCCCGCC--AAAA-T-TTTT-TT-CA-CTGAAAATTTGA--  
 Rev.of\_WB235\_2:9202525-9203501 Satlength=977 Nr of Repeats=16  
 RepeatLength=35 seed=TGGCGGGAAA Num.seqs=10 Similarity=0.909418  
 79 ATT-TCCCGCC--AAAA-T-TTTT-TT-CA-CTGAAAATTTGA--  
 Rev.of\_WB235\_4:1476030-1477123 Satlength=1094 Nr of Repeats=29  
 RepeatLength=35 seed=AAAAAATTTT Num.seqs=18 Similarity=0.995767  
 88 ATT-TCCCGCC--AAAA-T-TTTT-TT-CA-CTGAAAATTTGA--  
 Rev.of\_WB235\_4:10263336-10264889 Satlength=1554 Nr of Repeats=42  
 RepeatLength=35 seed=AATTCAAATT Num.seqs=30 Similarity=0.878991  
 71 ATT-TCCCGCC--AAAA-T-TTTT-TT-CA-CTGAAAATTTGA--  
 WB235\_4:12155676-12156286 Satlength=611 Nr of Repeats=8 RepeatLength=35  
 seed=AAATTTGAAT Num.seqs=5 Similarity=0.847619  
 60 ATT-TCCCGCC--AAAA-T-TTTT-TT-CA-CTGAAAATTTGA--  
 WB235\_4:14740489-14741012 Satlength=524 Nr of Repeats=15 RepeatLength=35  
 seed=AAATTTGAAT Num.seqs=9 Similarity=0.935450  
 60 ATT-TCCCGCC--AAAA-T-TTTT-TT-CA-CTGAAAATTTGA--  
 Rev.of\_WB235\_4:15320096-15321040 Satlength=945 Nr of Repeats=27  
 RepeatLength=35 seed=GAAATTCAAA Num.seqs=18 Similarity=0.936508  
 73 ATT-TCCCGCC--AAAA-T-TTTT-TT-CA-CTGAAAATTTGA--  
 WB235\_4:15971109-15972271 Satlength=1163 Nr of Repeats=29 RepeatLength=35  
 seed=TTCCCGCCAA Num.seqs=20 Similarity=0.886717  
 70 ATT-TCCCGCC--AAAA-T-TTTT-TT-CA-CTGAAAATTTGA--

Rev.of\_WB235\_5:1254505-1257773 Satlength=3269 Nr of Repeats=35  
 RepeatLength=35 seed=GCGGGAAATT Num.seqs=21 Similarity=0.865809  
 77 ATT-TCCCGCC--AAAA-T-TTTT-TT-CA-CTGAAAATTTGA--  
 WB235\_5:5009264-5010522 Satlength=1259 Nr of Repeats=36 RepeatLength=35  
 seed=AAATTTGAAT Num.seqs=26 Similarity=0.926974  
 60 ATT-TCCCGCC--AAAA-T-TTTT-TT-CA-CTGAAAATTTGA--  
 WB235\_5:6296625-6296906 Satlength=282 Nr of Repeats=8 RepeatLength=35  
 seed=AATTTCCCGC Num.seqs=7 Similarity=0.909297  
 67 ATT-TCCCGCC--AAAA-T-TTTT-TT-CA-CTGAAAATTTGA--  
 WB235\_5:6297848-6298284 Satlength=437 Nr of Repeats=5 RepeatLength=35  
 seed=TTTCCCGCCA Num.seqs=3 Similarity=0.916667  
 69 ATT-TCCCGCC--AAAA-T-TTTT-TT-CA-CTGAAAATTTGA--  
 Rev.of\_WB235\_5:9602338-9603453 Satlength=1116 Nr of Repeats=32  
 RepeatLength=35 seed=GCGGGAAATT Num.seqs=21 Similarity=0.936327  
 77 ATT-TCCCGCC--AAAA-T-TTTT-TT-CA-CTGAAAATTTGA--  
 Rev.of\_WB235\_5:13882409-13882690 Satlength=282 Nr of Repeats=8  
 RepeatLength=35 seed=GCGGGAAATT Num.seqs=5 Similarity=0.946667  
 77 ATT-TCCCGCC--AAAA-T-TTTT-TT-CA-CTGAAAATTTGA--  
 Rev.of\_WB235\_5:14124469-14125286 Satlength=818 Nr of Repeats=21  
 RepeatLength=35 seed=GGAAATTCAA Num.seqs=14 Similarity=0.914181  
 74 ATT-TCCCGCC--AAAA-T-TTTT-TT-CA-CTGAAAATTTGA--  
 Rev.of\_WB235\_5:15582889-15584265 Satlength=1377 Nr of Repeats=36  
 RepeatLength=35 seed=TTCAAATTTT Num.seqs=30 Similarity=0.828501  
 69 ATT-TCCCGCC--AAAA-T-TTTT-TT-CA-CTGAAAATTTGA--  
 WB235\_6:9188817-9189060 Satlength=244 Nr of Repeats=7 RepeatLength=35  
 seed=AAAAATTTGAA Num.seqs=5 Similarity=0.908571  
 94 ATT-TCCCGCC--AAAA-T-TTTT-TT-CA-CTGAAAATTTGA--  
 WB235\_3:10678429-10678847 Satlength=419 Nr of Repeats=11 RepeatLength=35  
 seed=CCGCCAAAAT Num.seqs=10 Similarity=0.943280  
 38 ATT-TCCCGCC--AAAA-T-ATTT-TT-CA-CTAAAAATTTGA--  
 Rev.of\_WB235\_3:10683224-10684272 Satlength=1049 Nr of Repeats=30  
 RepeatLength=35 seed=AAATTCAAAT Num.seqs=28 Similarity=0.892702  
 72 ATT-TCCCGCC--AAAA-T-ATTT-TT-CA-CTAAAAATTTGA--  
 Rev.of\_WB235\_4:15201340-15201723 Satlength=384 Nr of Repeats=11  
 RepeatLength=35 seed=GGGAAATTCA Num.seqs=7 Similarity=0.941950  
 40 ATT-TCCCGCC--AAAA-T-ATTT-TT-TA-CTAAAAATTTGA--  
 Rev.of\_WB235\_4:15201392-15202170 Satlength=779 Nr of Repeats=9  
 RepeatLength=35 seed=GTAAAAAATA Num.seqs=7 Similarity=0.929252  
 57 ATT-TCCCGCC--AAAA-T-ATTT-TT-TA-CTAAAAATTTGA--  
 Rev.of\_WB235\_1:7868653-7868828 Satlength=176 Nr of Repeats=5  
 RepeatLength=35 seed=GGGAAATTTA Num.seqs=5 Similarity=0.946667  
 40 ATT-TCCCGCC--AAAA-T-ATTT-TT-CA-CAGAAAATTTAA--  
 WB235\_2:14878167-14878554 Satlength=388 Nr of Repeats=11 RepeatLength=35  
 seed=CAGAAAATTT Num.seqs=9 Similarity=0.949206  
 56 ATT-TCCCGCC--AAAA-T-ATTT-TT-CA-CAGAAAATTTAA--  
 Rev.of\_WB235\_4:13462892-13463563 Satlength=672 Nr of Repeats=18  
 RepeatLength=35 seed=GAAATTTAAA Num.seqs=15 Similarity=0.948481  
 73 ATT-TCCCGCC--AAAA-T-ATTT-TT-CA-CAGAAAATTTAA--  
 Rev.of\_WB235\_4:13462893-13464435 Satlength=1543 Nr of Repeats=25  
 RepeatLength=35 seed=AAATTTAAAT Num.seqs=19 Similarity=0.791694  
 72 ATT-TCCCGCC--AAAA-T-ATTT-TT-CA-CAGAAAATTTAA--  
 Rev.of\_WB235\_4:13922549-13923902 Satlength=1354 Nr of Repeats=39  
 RepeatLength=35 seed=GGGAAATTTA Num.seqs=27 Similarity=0.939655  
 40 ATT-TCCCGCC--AAAA-T-ATTT-TT-CA-CAGAAAATTTAA--



Rev.of\_WB235\_4:15166547-15166687 Satlength=141 Nr of Repeats=4  
 RepeatLength=35 seed=AAATTTTCTG Num.seqs=4 Similarity=0.904762  
 66 ATT-TCCCGCC--AAAA-T-ATTT-TT-CA-CAGAAAATTTAA--  
 Rev.of\_WB235\_4:16910719-16910928 Satlength=210 Nr of Repeats=6  
 RepeatLength=35 seed=GAAATTTAAA Num.seqs=5 Similarity=0.900952  
 73 ATT-TCCCGCC--AAAA-T-ATTT-TT-CA-CAGAAAATTTAA--  
 Rev.of\_WB235\_4:17141438-17141648 Satlength=211 Nr of Repeats=6  
 RepeatLength=35 seed=AAATTTTCTG Num.seqs=6 Similarity=0.928889  
 66 ATT-TCCCGCC--AAAA-T-ATTT-TT-CA-CAGAAAATTTAA--  
 Rev.of\_WB235\_5:6071995-6072240 Satlength=246 Nr of Repeats=7  
 RepeatLength=35 seed=ATTTTGGCGG Num.seqs=7 Similarity=0.952834  
 48 ATT-TCCCGCC--AAAA-T-ATTT-TT-CA-CAGAAAATTTAA--  
 WB235\_5:7913711-7913991 Satlength=281 Nr of Repeats=8 RepeatLength=35  
 seed=CAGAAAATTT Num.seqs=8 Similarity=0.964626  
 56 ATT-TCCCGCC--AAAA-T-ATTT-TT-CA-CAGAAAATTTAA--  
 Rev.of\_WB235\_5:7916137-7916840 Satlength=704 Nr of Repeats=20  
 RepeatLength=35 seed=GGGAAATTTA Num.seqs=17 Similarity=0.971429  
 40 ATT-TCCCGCC--AAAA-T-ATTT-TT-CA-CAGAAAATTTAA--  
 WB235\_6:1375505-1376170 Satlength=666 Nr of Repeats=19 RepeatLength=35  
 seed=CCCGCCAAAA Num.seqs=19 Similarity=0.932275  
 72 ATT-TCCCGCC--AAAA-T-ATTT-TT-CA-CAGAAAATTTAA--  
 WB235\_6:13795780-13795990 Satlength=211 Nr of Repeats=6 RepeatLength=35  
 seed=CAGAAAATTT Num.seqs=6 Similarity=0.949206  
 56 ATT-TCCCGCC--AAAA-T-ATTT-TT-CA-CAGAAAATTTAA--  
 WB235\_6:15482252-15482427 Satlength=176 Nr of Repeats=5 RepeatLength=35  
 seed=ATTTAAATTT Num.seqs=5 Similarity=0.939048  
 62 ATT-TCCCGCC--AAAA-T-ATTT-TT-CA-CAGAAAATTTAA--  
 Rev.of\_WB235\_6:17311164-17311479 Satlength=316 Nr of Repeats=9  
 RepeatLength=35 seed=AAATTTTCTG Num.seqs=7 Similarity=0.909297  
 66 ATT-TCCCGCC--AAAA-T-ATTT-TT-CA-CAGAAAATTTAA--  
 Rev.of\_WB235\_4:15826993-15827272 Satlength=280 Nr of Repeats=8  
 RepeatLength=35 seed=AATTTAAATT Num.seqs=7 Similarity=0.896599  
 71 ATT-TCCCGCC--AAAA-T-ATTT-TT-CN-CAGAAAATTTAA--  
 WB235\_2:632106-632999 Satlength=894 Nr of Repeats=4 RepeatLength=35  
 seed=GAAAATTTAA Num.seqs=3 Similarity=0.923810  
 58 ATT-TCCCTCC--AAAA-T-ATTT-TT-CA-CAGAAAATTTAA--  
 Rev.of\_WB235\_2:14836894-14837772 Satlength=879 Nr of Repeats=25  
 RepeatLength=35 seed=TTAAATTTTC Num.seqs=22 Similarity=0.939312  
 68 ATT-TCCCTCC--AAAA-T-ATTT-TT-CA-CAGAAAATTTAA--  
 Rev.of\_WB235\_3:8336113-8336287 Satlength=175 Nr of Repeats=5  
 RepeatLength=35 seed=GGGAAATTTA Num.seqs=4 Similarity=0.974603  
 75 ATT-TCCCTCC--AAAA-T-ATTT-TT-CA-CAGAAAATTTAA--  
 Rev.of\_WB235\_1:14403308-14403517 Satlength=210 Nr of Repeats=6  
 RepeatLength=35 seed=AATTTAAATT Num.seqs=5 Similarity=0.859048  
 71 ATT-TCCCGCC--AAAA-T-ATTT-TT-CT-CAGAAAATTTAA--  
 WB235\_3:13447979-13448227 Satlength=249 Nr of Repeats=7 RepeatLength=35  
 seed=AATTTCCCGC Num.seqs=5 Similarity=0.885714  
 102 ATT-TCCCGCC--AAAA-T-ATTT-TT-CT-CAGAAAATTTAA--  
 WB235\_4:7441316-7441526 Satlength=211 Nr of Repeats=6 RepeatLength=35  
 seed=CAGAAAATTT Num.seqs=6 Similarity=0.926349  
 91 ATT-TCCCGCC--AAAA-T-ATTT-TT-CT-CAGAAAATTTAA--  
 WB235\_5:9439011-9439221 Satlength=211 Nr of Repeats=6 RepeatLength=35  
 seed=AGAAAATTTA Num.seqs=6 Similarity=0.888254  
 92 ATT-TCCCGCC--AAAA-T-ATTT-TT-CT-CAGAAAATTTAA--

WB235\_5:18777092-18777231 Satlength=140 Nr of Repeats=4 RepeatLength=35  
 seed=TCAGAAAATT Num.seqs=3 Similarity=0.923810  
 90 ATT-TCCCGCC--AAAA-T-ATTT-TT-CT-CAGAAAATTTAA--  
 WB235\_6:14937379-14937623 Satlength=245 Nr of Repeats=7 RepeatLength=35  
 seed=CAGAAAATTT Num.seqs=6 Similarity=0.893333  
 91 ATT-TCCCGCC--AAAA-T-ATTT-TT-CT-CAGAAAATTTAA--  
 WB235\_4:8469359-8469569 Satlength=211 Nr of Repeats=6 RepeatLength=35  
 seed=GAAAATTTAA Num.seqs=6 Similarity=0.898413  
 93 ATT-TCCCTCC--AAAA-T-ATTT-TT-CT-CAGAAAATTTAA--  
 WB235\_6:15635446-15635796 Satlength=351 Nr of Repeats=10 RepeatLength=35  
 seed=CAGAAAATTT Num.seqs=10 Similarity=0.875556  
 126 ATT-TCCCTCC--AAAA-T-ATTT-TT-CT-CAGAAAATTTAA--  
 WB235\_4:15765291-15766235 Satlength=945 Nr of Repeats=8 RepeatLength=35  
 seed=AAAATTTAAA Num.seqs=7 Similarity=0.883900  
 94 ATT-TCCCNCC--AAAA-T-ATTT-TT-CT-CAGAAAATTTAA--  
 Rev.of\_WB235\_2:15000726-15000995 Satlength=270 Nr of Repeats=5  
 RepeatLength=35 seed=ATTTTGGCGG Num.seqs=4 Similarity=0.904762  
 83 ATT-TCCCGCC--AAAA-T-ATTT-TT-CT-CCGAAAATTTAA--  
 WB235\_4:16675832-16676039 Satlength=208 Nr of Repeats=6 RepeatLength=35  
 seed=TTGAATTTCC Num.seqs=4 Similarity=0.917460  
 64 ATT-TCCCGCC--AAAA-T-ATTT-TT-CA-CAGAAAATTTGA--  
 Rev.of\_WB235\_6:142149-142814 Satlength=666 Nr of Repeats=19  
 RepeatLength=35 seed=GCGGGAAATT Num.seqs=15 Similarity=0.805405  
 77 ATT-TCCCGCC--AAAA-T-ATTT-TT-CA-CAAAAAATTTGA--  
 WB235\_2:9633206-9633906 Satlength=701 Nr of Repeats=20 RepeatLength=35  
 seed=CCAAAATATT Num.seqs=20 Similarity=0.928822  
 41 ATT-TCCCTCC--AAAA-T-ATTT-TT-TT-CAGAAAATTTAA--  
 WB235\_4:1153661-1154193 Satlength=533 Nr of Repeats=4 RepeatLength=35  
 seed=AAAATATTTT Num.seqs=3 Similarity=0.898413  
 43 ATT-TCCCTCC--AAAA-T-ATTT-TT-TT-CAGAAAATTTAA--  
 Rev.of\_WB235\_3:3896794-3897038 Satlength=245 Nr of Repeats=7  
 RepeatLength=35 seed=AATTTAAATT Num.seqs=6 Similarity=0.890794  
 71 ATT-TCCCGCC--AAAA-T-ATTT-TT-TT-CAGAAAATTTAA--  
 WB235\_4:4920980-4921503 Satlength=524 Nr of Repeats=15 RepeatLength=35  
 seed=TTTTCAGAAA Num.seqs=13 Similarity=0.973626  
 52 ATT-TCCCTCC--AAAA-T-ATTT-TT-TT-CAGAAAATTTAA--  
 WB235\_4:4923556-4923766 Satlength=211 Nr of Repeats=6 RepeatLength=35  
 seed=AATATTTTTT Num.seqs=6 Similarity=0.964444  
 80 ATT-TCCCTCC--AAAA-T-ATTT-TT-TT-CAGAAAATTTAA--  
 WB235\_4:4925825-4926035 Satlength=211 Nr of Repeats=6 RepeatLength=35  
 seed=AATATTTTTT Num.seqs=6 Similarity=0.939048  
 80 ATT-TCCCTCC--AAAA-T-ATTT-TT-TT-CAGAAAATTTAA--  
 Rev.of\_WB235\_3:12485043-12485356 Satlength=314 Nr of Repeats=8  
 RepeatLength=35 seed=TTCAAATTTT Num.seqs=5 Similarity=0.658559  
 34 ATT-TNCCGCC--AAAA-T-GTCT-TT-CA-CAGAAAATTTGA--  
 WB235\_5:19866564-19867301 Satlength=738 Nr of Repeats=21 RepeatLength=33  
 seed=TTTGAATTTT Num.seqs=17 Similarity=0.722086  
 26 -TT-TCCCACC--AAAA-T---TT-TC--T-CAAAAAATTTGAA-  
 WB235\_5:19755742-19756252 Satlength=511 Nr of Repeats=14 RepeatLength=34  
 seed=TTTCCCGCCA Num.seqs=12 Similarity=0.859774  
 32 -TT-TCCCGCC--AAAA-T---AT-TCACT-CNAAAAATTTGAA-  
 Rev.of\_WB235\_3:12762055-12762649 Satlength=595 Nr of Repeats=17  
 RepeatLength=35 seed=AAATTCAAAT Num.seqs=16 Similarity=0.851746  
 35 -TT-TCCCGCCATAAAA-T---AT-TT-CT-CAATAATTTGAA-

Rev.of\_WB235\_3:12345927-12348234 Satlength=2308 Nr of Repeats=63  
RepeatLength=35 seed=CGGGAAAATT Num.seqs=39 Similarity=0.947253  
40 -TT-TCCCGCC--AAAA-T--TTGTT--TCCAAAAAATTTGAAT  
Rev.of\_WB235\_5:17817728-17818258 Satlength=531 Nr of Repeats=13  
RepeatLength=34 seed=TCAAATTTTC Num.seqs=8 Similarity=0.860204  
0 ATT-T-CCGCC--AAAG-T-TTTT-TT-AA-AAGAAAAATTTGA--

\* \* \* \* \*

Consensus:

ATTtcCCGCCAAAAtnTtTTTTCaCaGAAAATTTgA

>WB235\_Fam\_5\_40\_94 Nr. of seq. 94 Alignment length(with gaps) = 41  
Alignment score = 0.668164  
WB235\_1:334679-335159 Satlength=481 Nr of Repeats=12 RepeatLength=40  
seed=AATTTTCTCG Num.seqs=12 Similarity=0.914646  
0 AATTTTCTCGAATTTCCAGAAGGTTCTAGAACATTTCa-G  
Rev.of\_WB235\_5:1352314-1352754 Satlength=441 Nr of Repeats=9  
RepeatLength=40 seed=AATGTTCTAG Num.seqs=6 Similarity=0.738753  
36 AATTTTCTCGAATTTTCCAGAAGGTTCTAGAACATTTCa-G  
WB235\_1:14668659-14668849 Satlength=191 Nr of Repeats=5 RepeatLength=40  
seed=CCAGAAGGTT Num.seqs=4 Similarity=0.800000  
16 AATTTTCTCGAATTTTCCAGAAGGTTCTAGAACATTCa-G  
WB235\_1:13613895-13615295 Satlength=1401 Nr of Repeats=35 RepeatLength=40  
seed=GAATTTTCTC Num.seqs=35 Similarity=0.957535  
39 AATTTTCTCGAATTTTCCAGAAGGTTCTGGAGCATTCa-G  
Rev.of\_WB235\_6:16100718-16101792 Satlength=1075 Nr of Repeats=13  
RepeatLength=40 seed=ATGTTCCAGA Num.seqs=12 Similarity=0.873676  
75 AATTTTCTCGAATTTTCCAGAAGGTTCTGGAACATTCa-G  
WB235\_4:2135958-2136208 Satlength=251 Nr of Repeats=6 RepeatLength=40  
seed=TTCCAGAATT Num.seqs=5 Similarity=0.866667  
74 AATTTTCTCGAATTTTCCAGAAGGTTCTAGAACATTCa-G  
Rev.of\_WB235\_4:13668023-13668625 Satlength=603 Nr of Repeats=12  
RepeatLength=40 seed=AAAATTCTGG Num.seqs=9 Similarity=0.870370  
86 AATTTTCTCGAATTTTCCAGAAGGTTCTAGAACATTCa-G  
Rev.of\_WB235\_6:443181-444059 Satlength=879 Nr of Repeats=19  
RepeatLength=40 seed=AAAATTCTGG Num.seqs=12 Similarity=0.943434  
86 AATTTTCTCGAATTTTCCAGAAGGTTCTAGAACATTCa-G  
Rev.of\_WB235\_4:13861930-13862600 Satlength=671 Nr of Repeats=11  
RepeatLength=40 seed=CTGGAATGTT Num.seqs=9 Similarity=0.940741  
40 AATTTTCTCAAATTTTCCAGAAGGTTCTGGAACATTCa-G  
Rev.of\_WB235\_5:16547704-16548504 Satlength=801 Nr of Repeats=18  
RepeatLength=40 seed=CTGGAATGTT Num.seqs=16 Similarity=0.952222  
40 AATTTTCTCAAATTTTCCAGAAGGTTCTGGAACATTCa-G  
Rev.of\_WB235\_5:16547704-16548822 Satlength=1119 Nr of Repeats=19  
RepeatLength=40 seed=CTGGAATGTT Num.seqs=16 Similarity=0.952222  
40 AATTTTCTCAAATTTTCCAGAAGGTTCTGGAACATTCa-G  
Rev.of\_WB235\_5:17043954-17044434 Satlength=481 Nr of Repeats=12  
RepeatLength=40 seed=AAAATTCTGG Num.seqs=12 Similarity=0.900000  
46 AATTTTCTCAAATTTTCCAAAAGGCTCTAGAACATTCa-G  
WB235\_6:17288074-17288675 Satlength=602 Nr of Repeats=6 RepeatLength=40  
seed=TTTCTCGAAT Num.seqs=4 Similarity=0.866667  
43 AAATTTCTCGAATCTTCCAGAAGGTTCTAGAACATTCa-G

WB235\_1:4573284-4573803 Satlength=520 Nr of Repeats=13 RepeatLength=40  
 seed=CATTCAGAA Num.seqs=12 Similarity=0.966667  
 22 ATTTTCTAGAAAGTTCTGGAACATTCCAGAATTTCCC-G  
 WB235\_3:2501737-2501917 Satlength=181 Nr of Repeats=5 RepeatLength=40  
 seed=TTCCAGAATT Num.seqs=4 Similarity=0.966667  
 24 ATTTTCTAGAAAGTTCTGGAACATTCCAGAATTTCCC-G  
 WB235\_4:15765625-15765904 Satlength=280 Nr of Repeats=6 RepeatLength=40  
 seed=GATTTTCTA Num.seqs=4 Similarity=0.911111  
 39 ATTTTCTAGAAAGTTCTGGAACATTCCAGAATTTCCC-G  
 Rev.of\_WB235\_5:6088840-6089240 Satlength=401 Nr of Repeats=10  
 RepeatLength=40 seed=TGGAATGTTC Num.seqs=10 Similarity=0.916622  
 29 ATTTTCTAGAAAGTTCTGGAACATTCCAGAATTTCCC-G  
 Rev.of\_WB235\_5:13440191-13440658 Satlength=468 Nr of Repeats=12  
 RepeatLength=40 seed=TCTGGAATGT Num.seqs=11 Similarity=0.922424  
 31 ATTTTCTAGAAAGTTCTGGAACATTCCAGAATTTCCC-G  
 Rev.of\_WB235\_6:142874-143634 Satlength=761 Nr of Repeats=19  
 RepeatLength=40 seed=GAAAATTCTG Num.seqs=19 Similarity=0.974269  
 37 ATTTTCTAGAAAGTTCTGGAACATTCCAGAATTTCCC-G  
 Rev.of\_WB235\_4:16910953-16911111 Satlength=159 Nr of Repeats=4  
 RepeatLength=40 seed=AAAATTCTGG Num.seqs=3 Similarity=0.977778  
 36 ATTTTCTAGAAAGTTCTGGAACATTCCAGAATTTCTC-G  
 WB235\_5:15320778-15321338 Satlength=561 Nr of Repeats=14 RepeatLength=40  
 seed=CGATTTTCT Num.seqs=14 Similarity=0.947985  
 38 ATTTTCTAGAAAGTTCTGGAACATTCCAGAATTTCTC-G  
 WB235\_6:1375049-1375406 Satlength=358 Nr of Repeats=9 RepeatLength=40  
 seed=ATTTTCTAG Num.seqs=6 Similarity=0.937778  
 40 ATTTTCTAGAAAGTTCTGGAACATTCCAGAATTTCTC-G  
 Rev.of\_WB235\_1:6647885-6648325 Satlength=441 Nr of Repeats=11  
 RepeatLength=40 seed=TTCTGGAATG Num.seqs=11 Similarity=0.960000  
 32 ATTTTCTAGAAAGTTCTGGAACATTCCAGAATTTCTC-G  
 Rev.of\_WB235\_1:7868937-7869457 Satlength=521 Nr of Repeats=13  
 RepeatLength=40 seed=GAATGTTCCA Num.seqs=11 Similarity=0.935758  
 67 ATTTTCTAGAAAGTTCTGGAACATTCCAGAATTTCTC-G  
 WB235\_2:9631891-9633131 Satlength=1241 Nr of Repeats=31 RepeatLength=40  
 seed=TTCTGGAACA Num.seqs=31 Similarity=0.949462  
 54 ATTTTCTAGAAAGTTCTGGAACATTCCAGAATTTCTC-G  
 WB235\_3:424780-427345 Satlength=2566 Nr of Repeats=43 RepeatLength=40  
 seed=ACATTCCAGA Num.seqs=41 Similarity=0.892358  
 61 ATTTTCTAGAAAGTTCTGGAACATTCCAGAATTTCTC-G  
 Rev.of\_WB235\_3:3897112-3897672 Satlength=561 Nr of Repeats=14  
 RepeatLength=40 seed=GTTCAGAAC Num.seqs=14 Similarity=0.942857  
 63 ATTTTCTAGAAAGTTCTGGAACATTCCAGAATTTCTC-G  
 WB235\_4:7441099-7441297 Satlength=199 Nr of Repeats=5 RepeatLength=40  
 seed=TCCAGAATTT Num.seqs=4 Similarity=0.966667  
 65 ATTTTCTAGAAAGTTCTGGAACATTCCAGAATTTCTC-G  
 WB235\_4:7441099-7441714 Satlength=616 Nr of Repeats=6 RepeatLength=40  
 seed=TCCAGAATTT Num.seqs=4 Similarity=0.966667  
 65 ATTTTCTAGAAAGTTCTGGAACATTCCAGAATTTCTC-G  
 WB235\_4:8467091-8469338 Satlength=2248 Nr of Repeats=33 RepeatLength=40  
 seed=TCCAGAATTT Num.seqs=27 Similarity=0.869136  
 65 ATTTTCTAGAAAGTTCTGGAACATTCCAGAATTTCTC-G  
 Rev.of\_WB235\_4:13847379-13847579 Satlength=201 Nr of Repeats=5  
 RepeatLength=40 seed=AATGTTCCAG Num.seqs=5 Similarity=0.973333  
 66 ATTTTCTAGAAAGTTCTGGAACATTCCAGAATTTCTC-G

Rev.of\_WB235\_4:15166752-15167072 Satlength=321 Nr of Repeats=8  
 RepeatLength=40 seed=GAATGTTCCA Num.seqs=8 Similarity=0.897619  
 67 ATTTTCTAGAAAGTTCTGGAACATTCCAGAATTTTCTC-G  
 WB235\_4:16458486-16458684 Satlength=199 Nr of Repeats=5 RepeatLength=40  
 seed=TTCCAGAATT Num.seqs=4 Similarity=0.966667  
 64 ATTTTCTAGAAAGTTCTGGAACATTCCAGAATTTTCTC-G  
 WB235\_6:168652-168890 Satlength=239 Nr of Repeats=6 RepeatLength=40  
 seed=TTCCAGAATT Num.seqs=5 Similarity=0.986667  
 64 ATTTTCTAGAAAGTTCTGGAACATTCCAGAATTTTCTC-G  
 WB235\_6:2002759-2003439 Satlength=681 Nr of Repeats=17 RepeatLength=40  
 seed=GAATTTTCTC Num.seqs=17 Similarity=0.955392  
 69 ATTTTCTAGAAAGTTCTGGAACATTCCAGAATTTTCTC-G  
 WB235\_6:2057847-2058368 Satlength=522 Nr of Repeats=13 RepeatLength=40  
 seed=TTTTCTCGAT Num.seqs=12 Similarity=0.960606  
 32 ATTTTCTAGAAAGTTCTGGAACATTCCAGAATTTTCTC-G  
 Rev.of\_WB235\_1:13231021-13231669 Satlength=649 Nr of Repeats=15  
 RepeatLength=40 seed=GAAAATTCTG Num.seqs=13 Similarity=0.967949  
 37 ATTTTCTAGAAAGTTCTGGAACATTTCCAGAATTTTCTC-G  
 Rev.of\_WB235\_6:17310825-17311809 Satlength=985 Nr of Repeats=10  
 RepeatLength=40 seed=AATGTTCCAG Num.seqs=9 Similarity=0.879630  
 66 ATTTTCTAGAAAGTTCTGGAACATTTCCAGAATTTTCTC-G  
 WB235\_4:16675606-16675766 Satlength=161 Nr of Repeats=4 RepeatLength=40  
 seed=TTCCAGAATT Num.seqs=4 Similarity=0.950000  
 64 ATTTTCTAGAAAGTTCTGGAACGTTCCAGAATTTTCCC-G  
 WB235\_5:4052517-4053360 Satlength=844 Nr of Repeats=21 RepeatLength=40  
 seed=CTAGAAAGTT Num.seqs=18 Similarity=0.796514  
 46 AATTCCTAGAAAGTTCTGGAACATTCCAGAATTTTCTT-G  
 Rev.of\_WB235\_3:8344363-8344643 Satlength=281 Nr of Repeats=7  
 RepeatLength=40 seed=TCTGGAATGT Num.seqs=7 Similarity=0.971429  
 31 ATTTTCTAGAAAGTTCTGGAACATTCCAGACTTTTCCC-A  
 WB235\_4:1153760-1154039 Satlength=280 Nr of Repeats=7 RepeatLength=40  
 seed=ATTTTCTAG Num.seqs=6 Similarity=0.911111  
 40 ATTTTCTAGAAAGTTCTGGAACATTCCAGACTTTTCCC-A  
 WB235\_4:1153773-1154667 Satlength=895 Nr of Repeats=10 RepeatLength=40  
 seed=GTTCTGGAAC Num.seqs=7 Similarity=0.844444  
 53 ATTTTCTAGAAAGTTCTGGAACATTCCAGACTTTTCCC-A  
 WB235\_5:1403527-1403806 Satlength=280 Nr of Repeats=7 RepeatLength=40  
 seed=ATTTTCTAG Num.seqs=6 Similarity=0.880000  
 40 ATTTTCTAGAAAGTTCTGGAACATTCCAGACTTTTCCC-A  
 Rev.of\_WB235\_5:7916966-7925007 Satlength=8042 Nr of Repeats=201  
 RepeatLength=40 seed=TTCTAGAAAA Num.seqs=194 Similarity=0.914186  
 52 ATTTTCTAGAAAGTTCTGGAACATTCCAGACTTTTCCC-A  
 Rev.of\_WB235\_1:778056-778335 Satlength=280 Nr of Repeats=6  
 RepeatLength=40 seed=GAACCTTCTG Num.seqs=4 Similarity=0.850000  
 7 AAGGTTCTAGAACATTCCAGAATTTTCTCAAATTTTCCA-G  
 Rev.of\_WB235\_2:4554394-4554914 Satlength=521 Nr of Repeats=13  
 RepeatLength=40 seed=TCCAGAACCT Num.seqs=13 Similarity=0.958120  
 11 AAGGTTCTGGAACATTCCAGAATTTTCTCAAATTTTCCA-G  
 WB235\_4:8467000-8468026 Satlength=1027 Nr of Repeats=15 RepeatLength=40  
 seed=TTCTGGAACA Num.seqs=14 Similarity=0.912088  
 44 AAGGTTCTGGAACATTCCAGAATTTTCTCAAATTTTCCA-G  
 WB235\_6:14723559-14724409 Satlength=851 Nr of Repeats=5 RepeatLength=40  
 seed=TTCTGGAACA Num.seqs=4 Similarity=0.866667  
 44 AAGGTTCTGGAACATTCCAGAATTTTCTCAAATTTTCCA-G

Rev.of\_WB235\_6:16100682-16101122 Satlength=441 Nr of Repeats=11  
 RepeatLength=40 seed=TCCAGAACCT Num.seqs=11 Similarity=0.950303  
 11 AAGGTTCTGGAACATTCCAGAATTTTCTCAAATTTTCCA-G  
 Rev.of\_WB235\_3:11160584-11160784 Satlength=201 Nr of Repeats=5  
 RepeatLength=40 seed=TCCAGAACCT Num.seqs=5 Similarity=0.960000  
 11 AAGGTTCTGGAACATTCCAGCATTTTCTCAAATTTTCCA-G  
 WB235\_4:15709349-15709549 Satlength=201 Nr of Repeats=5 RepeatLength=40  
 seed=ATTTTCCAGA Num.seqs=5 Similarity=0.920000  
 31 AAGGTTCTGGAACATTCCAGAATTTTCTCAAATTTTCCA-G  
 WB235\_2:633567-633717 Satlength=151 Nr of Repeats=4 RepeatLength=40  
 seed=CAGAAAGTTC Num.seqs=3 Similarity=0.800000  
 37 AAGGTTCTGGAACATTCCAGAATTTTCTAGAATTTTCCA-G  
 Rev.of\_WB235\_3:3895928-3896228 Satlength=301 Nr of Repeats=8  
 RepeatLength=40 seed=AGAACCTTCT Num.seqs=6 Similarity=0.824444  
 48 AAGGTTCTGGAACATTCCAGAATTTTCTAGAATTTTCCA-G  
 Rev.of\_WB235\_3:9534180-9534500 Satlength=321 Nr of Repeats=8  
 RepeatLength=40 seed=TCCAGAACCT Num.seqs=8 Similarity=0.945238  
 51 AAGGTTCTGGAACATTCCAGAATTTTCTCGAATTTTCCA-G  
 Rev.of\_WB235\_3:9534215-9534836 Satlength=622 Nr of Repeats=9  
 RepeatLength=40 seed=AATGTTCCAG Num.seqs=8 Similarity=0.903571  
 56 AAGGTTCTGGAACATTCCAGAATTTTCTCGAATTTTCCA-G  
 Rev.of\_WB235\_4:12022575-12022894 Satlength=320 Nr of Repeats=8  
 RepeatLength=40 seed=TCCAGAACCT Num.seqs=7 Similarity=0.946032  
 51 AAGGTTCTGGAACATTCCAGAATTTTCTCGAATTTTCCA-G  
 Rev.of\_WB235\_4:13861901-13862381 Satlength=481 Nr of Repeats=12  
 RepeatLength=40 seed=CAGAACCTTC Num.seqs=12 Similarity=0.914646  
 89 AAGGTTCTGGAACATTCCAGAATTTTCTCGAATTTTCCA-G  
 Rev.of\_WB235\_5:3520502-3520742 Satlength=241 Nr of Repeats=6  
 RepeatLength=40 seed=TCCAGAACCT Num.seqs=6 Similarity=0.931111  
 51 AAGGTTCTGGAACATTCCAGAATTTTCTCGAATTTTCCA-G  
 Rev.of\_WB235\_6:9007668-9008148 Satlength=481 Nr of Repeats=12  
 RepeatLength=40 seed=CTTCTGGAAA Num.seqs=12 Similarity=0.953030  
 83 AAGGTTCTGGAACATTCCAGAATTTTCTCGAATTTTCCA-G  
 WB235\_1:780732-781012 Satlength=281 Nr of Repeats=7 RepeatLength=40  
 seed=TCTAGAACAT Num.seqs=7 Similarity=0.838095  
 45 AAGGTTCTAGAACATTCCAGAATTTTCTCGAATTTTCCA-A  
 WB235\_5:1355392-1355652 Satlength=261 Nr of Repeats=6 RepeatLength=40  
 seed=CTAGAACATT Num.seqs=5 Similarity=0.712195  
 46 AANGTTCTAGAACATTCCAGAATTTTCTCGAATTTTCCA-G  
 Rev.of\_WB235\_1:14033367-14034207 Satlength=841 Nr of Repeats=24  
 RepeatLength=40 seed=TTCTGGAAAA Num.seqs=18 Similarity=0.755338  
 82 AAGGTTCTAGAACATTCCAGAATTTTATCGAATTTTCCA-G  
 Rev.of\_WB235\_4:2754821-2756571 Satlength=1751 Nr of Repeats=49  
 RepeatLength=40 seed=TTCTGGAAAA Num.seqs=36 Similarity=0.839524  
 82 AAGGTTCTAGAACATTCCAGAATTTTTCGAATTTTCCA-G  
 Rev.of\_WB235\_5:4050682-4051242 Satlength=561 Nr of Repeats=14  
 RepeatLength=40 seed=GAACCTTCTG Num.seqs=12 Similarity=0.857071  
 47 AAGGTTCAAAAACATTCCAGAATTTTCTCGAATTTTCCA-G  
 WB235\_5:1530916-1531076 Satlength=161 Nr of Repeats=4 RepeatLength=40  
 seed=GTTCTAGAAC Num.seqs=4 Similarity=0.875339  
 84 AAGGTTCTAGAACATTCCAGAATTTTCTCGAATTTTACCAGG  
 WB235\_3:12001471-12001873 Satlength=403 Nr of Repeats=10 RepeatLength=40  
 seed=ATTCAGAAAT Num.seqs=8 Similarity=0.860714  
 13 AAGGTTCTAGAACATTCCAGAATTTTTTAAAATTTTCCA-G

Rev.of\_WB235\_5:7115024-7115184 Satlength=161 Nr of Repeats=4  
 RepeatLength=40 seed=TTCTAGAACC Num.seqs=4 Similarity=0.794444  
 52 AAGGTTCTAGAACATTCCAGAATTTTCTNAACTTTCCA-G  
 WB235\_5:7442929-7443089 Satlength=161 Nr of Repeats=4 RepeatLength=40  
 seed=GAAGGTTCTA Num.seqs=4 Similarity=0.794444  
 79 AAGGTTCTAGAACATTCCAGAATTTTCTNAAAATTCCA-G  
 WB235\_4:2694935-2695125 Satlength=191 Nr of Repeats=5 RepeatLength=40  
 seed=GAATTTTCCA Num.seqs=4 Similarity=0.822222  
 29 AAAGTTCTAGAAAATTCCAGAATTTTTCGAATTTTCCA-G  
 Rev.of\_WB235\_1:3980821-3981021 Satlength=201 Nr of Repeats=6  
 RepeatLength=40 seed=TTTCTAGAAA Num.seqs=4 Similarity=0.816667  
 43 AAAATTCTGGACCATTCCGGAATTTTCTCGAATTTTCTA-G  
 Rev.of\_WB235\_4:3671203-3671723 Satlength=521 Nr of Repeats=15  
 RepeatLength=40 seed=TTTCTAGAAA Num.seqs=11 Similarity=0.820606  
 43 AAAATTCTGGACCATTCCNGAATTTTCTCGAATTTTCTA-G  
 Rev.of\_WB235\_1:7741780-7742262 Satlength=483 Nr of Repeats=13  
 RepeatLength=40 seed=TTTCTAGAAA Num.seqs=9 Similarity=0.834259  
 43 AAAGTTCTGGAATATTCCAGANTTTTCCCGAATTTTCTA-G  
 WB235\_4:14740244-14740404 Satlength=161 Nr of Repeats=5 RepeatLength=40  
 seed=TTTCTAGAA Num.seqs=3 Similarity=0.755556  
 72 AAAGTTCTGGAACATTCCAGAATTTTCCCGAATTTTCTA-G  
 Rev.of\_WB235\_5:9603508-9604068 Satlength=561 Nr of Repeats=15  
 RepeatLength=40 seed=TTTCTAGAAA Num.seqs=13 Similarity=0.855128  
 83 AAAATTCTGGAACATTCCAGAATTTTCTCGAATTTTCTA-G  
 WB235\_6:16851316-16851756 Satlength=441 Nr of Repeats=13 RepeatLength=40  
 seed=TTTCTAGAAA Num.seqs=9 Similarity=0.814815  
 113 AAANTTCTGGAACATTCCAGAATTTTCTCGAATTTTCTA-G  
 Rev.of\_WB235\_5:13882781-13883141 Satlength=361 Nr of Repeats=10  
 RepeatLength=40 seed=TTTCTAGAAA Num.seqs=8 Similarity=0.826190  
 83 AAAGTTCTGGAACATTCCAGAATTTTCTCGAATTTTCTA-G  
 WB235\_1:14686490-14687331 Satlength=842 Nr of Repeats=22 RepeatLength=40  
 seed=TCTAGAAAGT Num.seqs=19 Similarity=0.888304  
 75 AAAGTTCTGGAACATTCCAGAATTTTCTCGATTTTCTA-G  
 WB235\_4:13463828-13464877 Satlength=1050 Nr of Repeats=12 RepeatLength=40  
 seed=GTTCTGGAAC Num.seqs=10 Similarity=0.891111  
 83 AAAGTTCTGGAACATTCCAGAATTTTCTCGATTTTCTA-G  
 WB235\_6:2057868-2059356 Satlength=1489 Nr of Repeats=20 RepeatLength=40  
 seed=GTTCTGGAAC Num.seqs=15 Similarity=0.890159  
 83 AAAGTTCTGGAACATTCCAGAATTTTCTCGATTTTCTA-G  
 WB235\_6:13795118-13795677 Satlength=560 Nr of Repeats=14 RepeatLength=40  
 seed=GAACATTCCA Num.seqs=13 Similarity=0.911111  
 89 AAAGTTCTGGAACATTCCAGAATTTTCTCGATTTTCTA-G  
 WB235\_6:13795118-13796907 Satlength=1790 Nr of Repeats=19 RepeatLength=40  
 seed=GAACATTCCA Num.seqs=16 Similarity=0.884722  
 89 AAAGTTCTGGAACATTCCAGAATTTTCTCGATTTTCTA-G  
 WB235\_4:15895865-15896183 Satlength=319 Nr of Repeats=8 RepeatLength=40  
 seed=GAACATTCCA Num.seqs=6 Similarity=0.922222  
 89 AAAGTTCTGGAACATTCCAGAATTTTCTCAATTTTCTA-G  
 WB235\_2:632493-632813 Satlength=321 Nr of Repeats=8 RepeatLength=40  
 seed=TTTCTAGAAA Num.seqs=8 Similarity=0.917857  
 113 AAAATTCTGGAACATTCCAGAATTTTCCCGATTTTCTA-G  
 WB235\_3:424806-426326 Satlength=1521 Nr of Repeats=38 RepeatLength=40  
 seed=TAGAAAGTTC Num.seqs=38 Similarity=0.903556  
 117 AAAGTTCTGGAACATTCCAGAATTTTCCCGATTTTCTA-G

Rev.of\_WB235\_4:15826528-15827586 Satlength=1059 Nr of Repeats=8  
RepeatLength=40 seed=GTTCAGAAC Num.seqs=7 Similarity=0.814286  
133 AAAGTTCTGGAACATTCCAGAATTTTCCCGATTTTCTA-G  
Rev.of\_WB235\_5:6072277-6072797 Satlength=521 Nr of Repeats=13  
RepeatLength=40 seed=TTCCAGAACT Num.seqs=13 Similarity=0.959829  
132 AAAGTTCTGGAACATTCCAGAATTTTCCCGATTTTCTA-G  
WB235\_4:4920724-4920924 Satlength=201 Nr of Repeats=5 RepeatLength=40  
seed=TTCTAGAAAG Num.seqs=5 Similarity=0.913333  
154 AAAGTTCTGGAACATTTCNAGAATTTTCCCGATTTTCTA-G  
WB235\_2:8460034-8460434 Satlength=401 Nr of Repeats=10 RepeatLength=40  
seed=AAAGTTCTGG Num.seqs=10 Similarity=0.901482  
80 AAAGTTCTGGAACATTCCAGAATTTTCCCAATTTTCTA-G  
WB235\_3:13447046-13447886 Satlength=841 Nr of Repeats=21 RepeatLength=40  
seed=ATTTTCTAG Num.seqs=21 Similarity=0.903175  
110 AAAGTTCTGGAACATTCCAGAATTTTCCCAATTTTCTA-G  
WB235\_4:15374013-15374693 Satlength=681 Nr of Repeats=17 RepeatLength=40  
seed=GAACATTCCA Num.seqs=17 Similarity=0.919608  
89 AAAGTTCTGGAACATTCCAGAATTTTCCCAATTTTCTA-G  
WB235\_5:7912986-7913626 Satlength=641 Nr of Repeats=16 RepeatLength=40  
seed=TCTGGAACAT Num.seqs=16 Similarity=0.859790  
85 AAAGTTCTGGAACATTCCAGAATTTTCCCAATTTTCTA-G  
WB235\_6:15635133-15635373 Satlength=241 Nr of Repeats=6 RepeatLength=40  
seed=AAAGTTCTGG Num.seqs=6 Similarity=0.904444  
80 AAAGTTCTGGAACATTCCAGAATTTTCCCAATTTTCTA-G  
WB235\_4:15059144-15059784 Satlength=641 Nr of Repeats=16 RepeatLength=40  
seed=TTTCTAGAA Num.seqs=16 Similarity=0.900000  
112 AAAGTTCTGGAACATTCCAGAAATTTCCCGATTTTCTA-G

\* \* \* \* \*

Consensus:

AannTTCTnGAaCaTTCcaGAAttTTCtnGAaTTTTTcCaG

>WB235\_Fam\_6\_11\_75 Nr. of seq. 75 Alignment length(with gaps) = 12  
Alignment score = 0.809099  
WB235\_1:562402-562457 Satlength=56 Nr of Repeats=5 RepeatLength=11  
seed=GTACTCCTAC Num.seqs=5 Similarity=0.830303  
0 GTACTC-CTACC  
Rev.of\_WB235\_1:1214097-1214254 Satlength=158 Nr of Repeats=7  
RepeatLength=11 seed=GTACTGTAGG Num.seqs=6 Similarity=0.870707  
4 GTACTC-CTACA  
Rev.of\_WB235\_1:13230567-13230940 Satlength=374 Nr of Repeats=12  
RepeatLength=11 seed=GTACTGTAGG Num.seqs=9 Similarity=0.952862  
4 GTACTC-CTACA  
Rev.of\_WB235\_1:14402777-14402900 Satlength=124 Nr of Repeats=4  
RepeatLength=11 seed=GTACTGTAGG Num.seqs=3 Similarity=0.919192  
4 GTACTC-CTACA  
WB235\_2:633813-633947 Satlength=135 Nr of Repeats=4 RepeatLength=11  
seed=GTACTCCTAC Num.seqs=3 Similarity=0.838384  
11 GTACTC-CTACA  
WB235\_2:9634505-9634639 Satlength=135 Nr of Repeats=5 RepeatLength=11  
seed=GTACTCCTAC Num.seqs=4 Similarity=0.878788  
11 GTACTC-CTACA



Rev.of\_WB235\_2:13989510-13989877 Satlength=368 Nr of Repeats=11  
 RepeatLength=11 seed=GTACTGTAGG Num.seqs=8 Similarity=0.878788  
 4 GTACTC-CTACA  
 WB235\_3:427473-427977 Satlength=505 Nr of Repeats=18 RepeatLength=11  
 seed=CTACAGTACT Num.seqs=12 Similarity=0.773779  
 6 GTACTC-CTACA  
 Rev.of\_WB235\_3:1320466-1320612 Satlength=147 Nr of Repeats=5  
 RepeatLength=11 seed=GTACTGTAGG Num.seqs=3 Similarity=0.919192  
 4 GTACTC-CTACA  
 Rev.of\_WB235\_3:9533702-9534094 Satlength=393 Nr of Repeats=13  
 RepeatLength=11 seed=GTACTGTAGG Num.seqs=8 Similarity=0.796537  
 4 GTACTC-CTACA  
 WB235\_4:1154757-1155014 Satlength=258 Nr of Repeats=8 RepeatLength=11  
 seed=GTACTCCTAC Num.seqs=5 Similarity=0.854545  
 11 GTACTC-CTACA  
 WB235\_4:2245441-2245572 Satlength=132 Nr of Repeats=4 RepeatLength=11  
 seed=GTACTCCTAC Num.seqs=3 Similarity=0.838384  
 11 GTACTC-CTACA  
 Rev.of\_WB235\_4:2754343-2754722 Satlength=380 Nr of Repeats=12  
 RepeatLength=11 seed=TACTGTAGGA Num.seqs=8 Similarity=0.787698  
 14 GTACTC-CTACA  
 Rev.of\_WB235\_4:4305710-4305967 Satlength=258 Nr of Repeats=5  
 RepeatLength=11 seed=GTACTGTAGG Num.seqs=3 Similarity=1.000000  
 4 GTACTC-CTACA  
 WB235\_4:4325075-4325582 Satlength=508 Nr of Repeats=13 RepeatLength=11  
 seed=CTACAGTACT Num.seqs=9 Similarity=0.878788  
 6 GTACTC-CTACA  
 WB235\_4:4554554-4555060 Satlength=507 Nr of Repeats=13 RepeatLength=11  
 seed=CTACAGTACT Num.seqs=9 Similarity=0.878788  
 6 GTACTC-CTACA  
 WB235\_4:9411725-9412004 Satlength=280 Nr of Repeats=10 RepeatLength=11  
 seed=GTACTCCTAC Num.seqs=8 Similarity=0.883117  
 11 GTACTC-CTACA  
 Rev.of\_WB235\_4:13845937-13846071 Satlength=135 Nr of Repeats=6  
 RepeatLength=11 seed=AGTACTGTAG Num.seqs=4 Similarity=0.939394  
 5 GTACTC-CTACA  
 Rev.of\_WB235\_4:13922018-13922152 Satlength=135 Nr of Repeats=6  
 RepeatLength=11 seed=AGTACTGTAG Num.seqs=4 Similarity=0.939394  
 5 GTACTC-CTACA  
 WB235\_4:15766783-15767403 Satlength=621 Nr of Repeats=19 RepeatLength=11  
 seed=GTACTCCTAC Num.seqs=13 Similarity=0.888112  
 11 GTACTC-CTACA  
 Rev.of\_WB235\_4:16094815-16095563 Satlength=749 Nr of Repeats=18  
 RepeatLength=11 seed=GTACTGTAGG Num.seqs=12 Similarity=0.878788  
 4 GTACTC-CTACA  
 Rev.of\_WB235\_4:16910220-16910354 Satlength=135 Nr of Repeats=6  
 RepeatLength=11 seed=AGTACTGTAG Num.seqs=4 Similarity=0.939394  
 5 GTACTC-CTACA  
 WB235\_4:17076321-17076588 Satlength=268 Nr of Repeats=10 RepeatLength=11  
 seed=CCTACAGTAC Num.seqs=6 Similarity=0.716667  
 5 GTACTC-CTACA  
 Rev.of\_WB235\_5:3520159-3520417 Satlength=259 Nr of Repeats=7  
 RepeatLength=11 seed=TACTGTAGGA Num.seqs=5 Similarity=0.763889  
 14 GTACTC-CTACA

Rev.of\_WB235\_5:5004204-5005690 Satlength=1487 Nr of Repeats=35  
 RepeatLength=11 seed=GTACTGTAGG Num.seqs=22 Similarity=0.888233  
 4 GTACTC-CTACA  
 WB235\_5:9439666-9439923 Satlength=258 Nr of Repeats=8 RepeatLength=11  
 seed=GTACTCCTAC Num.seqs=6 Similarity=0.870707  
 11 GTACTC-CTACA  
 WB235\_5:15322538-15322672 Satlength=135 Nr of Repeats=5 RepeatLength=11  
 seed=GTACTCCTAC Num.seqs=4 Similarity=0.878788  
 11 GTACTC-CTACA  
 Rev.of\_WB235\_5:16547005-16547587 Satlength=583 Nr of Repeats=10  
 RepeatLength=11 seed=GTACTGTAGG Num.seqs=6 Similarity=0.846465  
 4 GTACTC-CTACA  
 WB235\_5:17495404-17495538 Satlength=135 Nr of Repeats=5 RepeatLength=11  
 seed=CCTACAGTAC Num.seqs=3 Similarity=0.919192  
 5 GTACTC-CTACA  
 WB235\_5:20588792-20588997 Satlength=206 Nr of Repeats=5 RepeatLength=11  
 seed=CCTACAGTAC Num.seqs=3 Similarity=1.000000  
 5 GTACTC-CTACA  
 WB235\_6:1376859-1377239 Satlength=381 Nr of Repeats=13 RepeatLength=11  
 seed=GTACTCCTAC Num.seqs=10 Similarity=0.886869  
 11 GTACTC-CTACA  
 WB235\_6:5230547-5230804 Satlength=258 Nr of Repeats=10 RepeatLength=11  
 seed=CTACAGTACT Num.seqs=7 Similarity=0.849928  
 6 GTACTC-CTACA  
 WB235\_6:11489369-11489615 Satlength=247 Nr of Repeats=7 RepeatLength=11  
 seed=TCCTACAGTA Num.seqs=5 Similarity=0.854545  
 4 GTACTC-CTACA  
 WB235\_6:13797037-13797540 Satlength=504 Nr of Repeats=19 RepeatLength=11  
 seed=CTACAGTACT Num.seqs=14 Similarity=0.771368  
 6 GTACTC-CTACA  
 WB235\_6:14724532-14724801 Satlength=270 Nr of Repeats=10 RepeatLength=11  
 seed=CCTACAGTAC Num.seqs=6 Similarity=0.738889  
 5 GTACTC-CTACA  
 WB235\_1:1430568-1430936 Satlength=369 Nr of Repeats=14 RepeatLength=11  
 seed=CTACAGTACT Num.seqs=10 Similarity=0.753704  
 6 GTACTN-CTACA  
 Rev.of\_WB235\_2:1033777-1034280 Satlength=504 Nr of Repeats=17  
 RepeatLength=11 seed=GTACTGTAGG Num.seqs=11 Similarity=0.819284  
 4 GTACTN-CTACA  
 WB235\_2:2348715-2349106 Satlength=392 Nr of Repeats=13 RepeatLength=11  
 seed=CTACAGTACC Num.seqs=9 Similarity=0.763889  
 6 GTACTN-CTACA  
 WB235\_2:12701130-12701355 Satlength=226 Nr of Repeats=7 RepeatLength=11  
 seed=CTACAGTACC Num.seqs=5 Similarity=0.775000  
 6 GTACTN-CTACA  
 WB235\_4:8565636-8566140 Satlength=505 Nr of Repeats=13 RepeatLength=11  
 seed=CTACAGTACT Num.seqs=9 Similarity=0.865320  
 6 GTACTN-CTACA  
 Rev.of\_WB235\_4:12022220-12022489 Satlength=270 Nr of Repeats=10  
 RepeatLength=11 seed=GTACTGTAGG Num.seqs=7 Similarity=0.832612  
 4 GTACTN-CTACA  
 WB235\_4:16511822-16512828 Satlength=1007 Nr of Repeats=39 RepeatLength=11  
 seed=CTACAGTACT Num.seqs=30 Similarity=0.778225  
 6 GTACTN-CTACA

WB235\_5:1911033-1911178 Satlength=146 Nr of Repeats=7 RepeatLength=11  
 seed=CTACAGTACT Num.seqs=6 Similarity=0.723148  
 6 GTACTN-CTACA  
 WB235\_5:16878345-16878591 Satlength=247 Nr of Repeats=7 RepeatLength=11  
 seed=CTACAGTACC Num.seqs=5 Similarity=0.786111  
 6 GTACTN-CTACA  
 WB235\_5:20260289-20260916 Satlength=628 Nr of Repeats=16 RepeatLength=11  
 seed=CTACAGTACT Num.seqs=11 Similarity=0.854545  
 6 GTACTN-CTACA  
 WB235\_6:944053-944332 Satlength=280 Nr of Repeats=13 RepeatLength=11  
 seed=CTACAGTACT Num.seqs=11 Similarity=0.823691  
 6 GTACTN-CTACA  
 Rev.of\_WB235\_6:1610992-1611280 Satlength=289 Nr of Repeats=10  
 RepeatLength=11 seed=GTACTGTAGG Num.seqs=6 Similarity=0.790741  
 4 GTACTN-CTACA  
 Rev.of\_WB235\_6:9007305-9007574 Satlength=270 Nr of Repeats=10  
 RepeatLength=11 seed=GTACTGTAGG Num.seqs=7 Similarity=0.832612  
 4 GTACTN-CTACA  
 Rev.of\_WB235\_6:16100349-16100596 Satlength=248 Nr of Repeats=8  
 RepeatLength=11 seed=GTACTGTAGG Num.seqs=5 Similarity=0.755556  
 4 GTACTN-CTACA  
 Rev.of\_WB235\_2:10832628-10833651 Satlength=1024 Nr of Repeats=24  
 RepeatLength=11 seed=GTACTGTAGG Num.seqs=16 Similarity=0.896970  
 4 GTACTA-CTACA  
 WB235\_5:1404428-1404696 Satlength=269 Nr of Repeats=8 RepeatLength=11  
 seed=CTACAGTACC Num.seqs=6 Similarity=0.798148  
 6 GTACTA-CTACA  
 Rev.of\_WB235\_6:28398-28532 Satlength=135 Nr of Repeats=5 RepeatLength=11  
 seed=GTACTGTAGT Num.seqs=3 Similarity=1.000000  
 4 GTACTA-CTACA  
 Rev.of\_WB235\_1:11420316-11421039 Satlength=724 Nr of Repeats=15  
 RepeatLength=11 seed=GTACTGTAGG Num.seqs=9 Similarity=0.841751  
 4 GTACCC-CTACA  
 Rev.of\_WB235\_2:882370-882522 Satlength=153 Nr of Repeats=5  
 RepeatLength=11 seed=TGTAGGGGTA Num.seqs=3 Similarity=1.000000  
 11 GTACCC-CTACA  
 WB235\_2:12350820-12350876 Satlength=57 Nr of Repeats=5 RepeatLength=11  
 seed=CTACAGTACC Num.seqs=4 Similarity=0.919192  
 6 GTACCC-CTACA  
 WB235\_2:13415355-13415629 Satlength=275 Nr of Repeats=20 RepeatLength=11  
 seed=CCTACAGTAC Num.seqs=12 Similarity=0.853076  
 5 GTACCC-CTACA  
 WB235\_3:259921-260355 Satlength=435 Nr of Repeats=11 RepeatLength=11  
 seed=CCTACAGTAC Num.seqs=7 Similarity=0.965368  
 5 GTACCC-CTACA  
 Rev.of\_WB235\_3:1326908-1327395 Satlength=488 Nr of Repeats=33  
 RepeatLength=11 seed=GGTACTGTAG Num.seqs=21 Similarity=0.844156  
 5 GTACCC-CTACA  
 Rev.of\_WB235\_3:1633390-1634249 Satlength=860 Nr of Repeats=41  
 RepeatLength=11 seed=TACTGTAGG Num.seqs=30 Similarity=0.811076  
 14 GTACCC-CTACA  
 WB235\_4:9433776-9433910 Satlength=135 Nr of Repeats=4 RepeatLength=11  
 seed=CCCTACAGTA Num.seqs=3 Similarity=0.919192  
 4 GTACCC-CTACA

WB235\_4:16522968-16523369 Satlength=402 Nr of Repeats=28 RepeatLength=11  
seed=CCCCTACAGT Num.seqs=17 Similarity=0.887701  
14 GTACCC-CTACA  
WB235\_5:14057570-14057714 Satlength=145 Nr of Repeats=6 RepeatLength=11  
seed=CTACAGTACC Num.seqs=4 Similarity=0.818182  
6 GTACCC-CTACA  
Rev.of\_WB235\_5:15823540-15823605 Satlength=66 Nr of Repeats=4  
RepeatLength=11 seed=GTACTGTAGG Num.seqs=3 Similarity=0.919192  
4 GTACCC-CTACA  
WB235\_5:17619161-17619418 Satlength=258 Nr of Repeats=8 RepeatLength=11  
seed=CCTACAGTAC Num.seqs=6 Similarity=0.886869  
5 GTACCC-CTACA  
Rev.of\_WB235\_2:4094407-4094663 Satlength=257 Nr of Repeats=13  
RepeatLength=11 seed=GTACTGTAGG Num.seqs=9 Similarity=0.735043  
4 GTACNC-CTACA  
WB235\_3:520005-520140 Satlength=136 Nr of Repeats=6 RepeatLength=11  
seed=CTACAGTACC Num.seqs=4 Similarity=0.858586  
6 GTACCA-CTACA  
WB235\_3:2035722-2035981 Satlength=260 Nr of Repeats=20 RepeatLength=11  
seed=CTACAGTACC Num.seqs=14 Similarity=0.795788  
6 GTACCN-CTACA  
WB235\_5:2141423-2141937 Satlength=515 Nr of Repeats=18 RepeatLength=11  
seed=CTACAGTACC Num.seqs=14 Similarity=0.742063  
6 GTACCN-CTACA  
Rev.of\_WB235\_4:10025402-10025894 Satlength=493 Nr of Repeats=10  
RepeatLength=11 seed=TACTGTAGG Num.seqs=6 Similarity=0.935354  
14 GTAACC-CTACA  
Rev.of\_WB235\_5:3731028-3731508 Satlength=481 Nr of Repeats=23  
RepeatLength=11 seed=AGGATTACTG Num.seqs=15 Similarity=0.843001  
19 GTAATC-CTACA  
WB235\_3:11331372-11331497 Satlength=126 Nr of Repeats=4 RepeatLength=11  
seed=CTACAGTACT Num.seqs=3 Similarity=0.838384  
6 GTACTT-CTACA  
Rev.of\_WB235\_3:11700371-11700706 Satlength=336 Nr of Repeats=7  
RepeatLength=11 seed=GTACTGTAGA Num.seqs=5 Similarity=0.854545  
15 GTACNT-CTACA  
WB235\_5:7443218-7444716 Satlength=1499 Nr of Repeats=50 RepeatLength=11  
seed=CTACAGTACC Num.seqs=38 Similarity=0.685961  
6 GTACCT-CTACA  
WB235\_4:2136323-2136466 Satlength=144 Nr of Repeats=5 RepeatLength=11  
seed=CTACAGTACC Num.seqs=4 Similarity=0.796296  
6 GTACCTACTACA  
Rev.of\_WB235\_1:11763187-11763333 Satlength=147 Nr of Repeats=6  
RepeatLength=11 seed=AGTACTGTAG Num.seqs=4 Similarity=0.731481  
16 GTACTNACTACA

\*\*\* \*\*\*\*

Consensus:

GTACTcCTACA

>WB235\_Fam\_7\_15\_70 Nr. of seq. 70 Alignment length(with gaps) = 15  
Alignment score = 0.826961

WB235\_1:902260-902411 Satlength=152 Nr of Repeats=8 RepeatLength=15  
 seed=ATCTTCTTTT Num.seqs=5 Similarity=0.911111  
 0 ATCTTCTTTTCGTAG  
 WB235\_1:2144021-2144187 Satlength=167 Nr of Repeats=10 RepeatLength=15  
 seed=AGATCTTGTT Num.seqs=8 Similarity=0.831746  
 13 ATCTTGTTTTTCGTAG  
 Rev.of\_WB235\_2:12002438-12002513 Satlength=76 Nr of Repeats=4  
 RepeatLength=15 seed=AAAACAAGAT Num.seqs=3 Similarity=0.792593  
 25 ATCTTGTTTTTNGTAG  
 WB235\_2:690749-690809 Satlength=61 Nr of Repeats=4 RepeatLength=15  
 seed=GTAGATCTTG Num.seqs=4 Similarity=0.675347  
 26 ATCTTGTTTTGGTAG  
 WB235\_2:7475407-7475467 Satlength=61 Nr of Repeats=4 RepeatLength=15  
 seed=GTAGATCTTG Num.seqs=4 Similarity=0.675347  
 26 ATCTTGTTTTGGTAG  
 WB235\_4:17285019-17285079 Satlength=61 Nr of Repeats=4 RepeatLength=15  
 seed=GTAGATCTTG Num.seqs=4 Similarity=0.675347  
 26 ATCTTGTTTTGGTAG  
 Rev.of\_WB235\_5:100578-100668 Satlength=91 Nr of Repeats=6 RepeatLength=15  
 seed=AAAAGGAGAA Num.seqs=6 Similarity=0.822222  
 10 TTCTCCTTTTCGTNG  
 WB235\_5:100901-100991 Satlength=91 Nr of Repeats=6 RepeatLength=15  
 seed=TTCTCCTTTT Num.seqs=6 Similarity=0.792593  
 15 TTCTCCTTTTCGTNG  
 Rev.of\_WB235\_1:4958855-4958932 Satlength=78 Nr of Repeats=5  
 RepeatLength=15 seed=CGAAAAGGGG Num.seqs=4 Similarity=0.807407  
 12 CTCCCCTTTTCGTAT  
 WB235\_1:4959104-4959196 Satlength=93 Nr of Repeats=5 RepeatLength=15  
 seed=CTCCCCTTTT Num.seqs=3 Similarity=0.847222  
 15 CTCCCCTTTTCGTAT  
 WB235\_1:4961695-4961802 Satlength=108 Nr of Repeats=6 RepeatLength=15  
 seed=CTCCCCTTTT Num.seqs=4 Similarity=0.869792  
 15 CTCCCCTTTTCGTAT  
 Rev.of\_WB235\_2:1134516-1134593 Satlength=78 Nr of Repeats=5  
 RepeatLength=15 seed=CGAAAAGGGG Num.seqs=4 Similarity=0.777778  
 12 CTCCCCTTTTCGTAT  
 Rev.of\_WB235\_3:6551383-6551520 Satlength=138 Nr of Repeats=9  
 RepeatLength=15 seed=CGAAAAGGGG Num.seqs=8 Similarity=0.847619  
 12 CTCCCCTTTTCGTAT  
 Rev.of\_WB235\_3:12878018-12878110 Satlength=93 Nr of Repeats=5  
 RepeatLength=15 seed=CGAAAAGGGG Num.seqs=3 Similarity=0.881481  
 12 CTCCCCTTTTCGTAT  
 WB235\_4:1447227-1447319 Satlength=93 Nr of Repeats=6 RepeatLength=15  
 seed=TCCCCTTTTC Num.seqs=5 Similarity=0.840000  
 16 CTCCCCTTTTCGTAT  
 Rev.of\_WB235\_4:4702090-4702167 Satlength=78 Nr of Repeats=5  
 RepeatLength=15 seed=CGAAAAGGGG Num.seqs=4 Similarity=0.777778  
 12 CTCCCCTTTTCGTAT  
 Rev.of\_WB235\_4:8015849-8015941 Satlength=93 Nr of Repeats=5  
 RepeatLength=15 seed=CGAAAAGGGG Num.seqs=3 Similarity=0.881481  
 12 CTCCCCTTTTCGTAT  
 WB235\_4:12621744-12621836 Satlength=93 Nr of Repeats=5 RepeatLength=15  
 seed=TCCCCTTTTC Num.seqs=3 Similarity=0.881481  
 16 CTCCCCTTTTCGTAT

WB235\_1:5176308-5176383 Satlength=76 Nr of Repeats=5 RepeatLength=15  
seed=TCCCCCTTTTC Num.seqs=5 Similarity=0.768889  
16 CTCCCCCTTTTCGTAG  
Rev.of\_WB235\_1:10468958-10469050 Satlength=93 Nr of Repeats=6  
RepeatLength=15 seed=CGAAAAGGGG Num.seqs=5 Similarity=0.768889  
27 CTCCCCCTTTTCGTAG  
WB235\_1:10469225-10469317 Satlength=93 Nr of Repeats=6 RepeatLength=15  
seed=TCCCCCTTTTC Num.seqs=5 Similarity=0.768889  
16 CTCCCCCTTTTCGTAG  
WB235\_2:1134783-1134875 Satlength=93 Nr of Repeats=6 RepeatLength=15  
seed=TCCCCCTTTTC Num.seqs=5 Similarity=0.768889  
16 CTCCCCCTTTTCGTAG  
Rev.of\_WB235\_2:7894727-7894819 Satlength=93 Nr of Repeats=6  
RepeatLength=15 seed=CGAAAAGGGG Num.seqs=5 Similarity=0.768889  
27 CTCCCCCTTTTCGTAG  
WB235\_2:7894995-7895087 Satlength=93 Nr of Repeats=6 RepeatLength=15  
seed=CCCCTTTTCG Num.seqs=5 Similarity=0.733333  
17 CTCCCCCTTTTCGTAG  
WB235\_2:10248425-10248517 Satlength=93 Nr of Repeats=6 RepeatLength=15  
seed=TCCCCCTTTTC Num.seqs=5 Similarity=0.733333  
16 CTCCCCCTTTTCGTAG  
Rev.of\_WB235\_2:11534628-11534720 Satlength=93 Nr of Repeats=6  
RepeatLength=15 seed=CGAAAAGGGG Num.seqs=5 Similarity=0.768889  
27 CTCCCCCTTTTCGTAG  
WB235\_2:11534895-11534970 Satlength=76 Nr of Repeats=5 RepeatLength=15  
seed=TCCCCCTTTTC Num.seqs=5 Similarity=0.768889  
16 CTCCCCCTTTTCGTAG  
Rev.of\_WB235\_2:14346267-14346344 Satlength=78 Nr of Repeats=5  
RepeatLength=15 seed=CGAAAAGGGG Num.seqs=4 Similarity=0.748148  
27 CTCCCCCTTTTCGTAG  
WB235\_3:7708901-7708993 Satlength=93 Nr of Repeats=6 RepeatLength=15  
seed=TCCCCCTTTTC Num.seqs=5 Similarity=0.768889  
16 CTCCCCCTTTTCGTAG  
WB235\_3:10436489-10436581 Satlength=93 Nr of Repeats=6 RepeatLength=15  
seed=TCCCCCTTTTC Num.seqs=5 Similarity=0.768889  
16 CTCCCCCTTTTCGTAG  
WB235\_4:628375-628467 Satlength=93 Nr of Repeats=6 RepeatLength=15  
seed=TCCCCCTTTTC Num.seqs=5 Similarity=0.768889  
16 CTCCCCCTTTTCGTAG  
Rev.of\_WB235\_4:3050503-3050595 Satlength=93 Nr of Repeats=6  
RepeatLength=15 seed=CGAAAAGGGG Num.seqs=5 Similarity=0.760000  
27 CTCCCCCTTTTCGTAG  
WB235\_4:3050770-3050862 Satlength=93 Nr of Repeats=6 RepeatLength=15  
seed=TCCCCCTTTTC Num.seqs=5 Similarity=0.768889  
16 CTCCCCCTTTTCGTAG  
Rev.of\_WB235\_4:4401664-4401741 Satlength=78 Nr of Repeats=5  
RepeatLength=15 seed=CGAAAAGGGG Num.seqs=4 Similarity=0.748148  
27 CTCCCCCTTTTCGTAG  
WB235\_4:4702342-4702434 Satlength=93 Nr of Repeats=6 RepeatLength=15  
seed=TCCCCCTTTTC Num.seqs=5 Similarity=0.768889  
16 CTCCCCCTTTTCGTAG  
WB235\_4:8016116-8016208 Satlength=93 Nr of Repeats=6 RepeatLength=15  
seed=TCCCCCTTTTC Num.seqs=5 Similarity=0.768889  
16 CTCCCCCTTTTCGTAG

Rev.of\_WB235\_4:11178974-11179067 Satlength=94 Nr of Repeats=6  
 RepeatLength=15 seed=CGAAAAGGGG Num.seqs=4 Similarity=0.748148  
 27 CTCCCCTTTTCGTAG  
 Rev.of\_WB235\_4:12621478-12621570 Satlength=93 Nr of Repeats=6  
 RepeatLength=15 seed=CGAAAAGGGG Num.seqs=5 Similarity=0.768889  
 27 CTCCCCTTTTCGTAG  
 Rev.of\_WB235\_4:15199553-15199645 Satlength=93 Nr of Repeats=6  
 RepeatLength=15 seed=CGAAAAGGGG Num.seqs=5 Similarity=0.768889  
 27 CTCCCCTTTTCGTAG  
 Rev.of\_WB235\_5:1197262-1197339 Satlength=78 Nr of Repeats=5  
 RepeatLength=15 seed=CGAAAAGGGG Num.seqs=4 Similarity=0.748148  
 27 CTCCCCTTTTCGTAG  
 WB235\_5:1197514-1197589 Satlength=76 Nr of Repeats=5 RepeatLength=15  
 seed=TCCCCTTTTC Num.seqs=5 Similarity=0.768889  
 16 CTCCCCTTTTCGTAG  
 Rev.of\_WB235\_5:5754995-5755070 Satlength=76 Nr of Repeats=5  
 RepeatLength=15 seed=CGAAAAGGGG Num.seqs=5 Similarity=0.768889  
 27 CTCCCCTTTTCGTAG  
 WB235\_5:5755255-5755347 Satlength=93 Nr of Repeats=6 RepeatLength=15  
 seed=TCCCCTTTTC Num.seqs=5 Similarity=0.733333  
 16 CTCCCCTTTTCGTAG  
 WB235\_5:14444028-14444120 Satlength=93 Nr of Repeats=6 RepeatLength=15  
 seed=TCCCCTTTTC Num.seqs=5 Similarity=0.768889  
 16 CTCCCCTTTTCGTAG  
 Rev.of\_WB235\_5:15770931-15771023 Satlength=93 Nr of Repeats=6  
 RepeatLength=15 seed=CGAAAAGGGG Num.seqs=5 Similarity=0.768889  
 27 CTCCCCTTTTCGTAG  
 Rev.of\_WB235\_5:16552748-16552808 Satlength=61 Nr of Repeats=4  
 RepeatLength=15 seed=CGAAAAGGGG Num.seqs=4 Similarity=0.748148  
 27 CTCCCCTTTTCGTAG  
 WB235\_4:17345179-17345256 Satlength=78 Nr of Repeats=5 RepeatLength=15  
 seed=TTCCCCTTTT Num.seqs=4 Similarity=0.866667  
 15 TTCCCCTTTTCGTAT  
 WB235\_1:5621701-5621793 Satlength=93 Nr of Repeats=6 RepeatLength=15  
 seed=TCCCCTTTTC Num.seqs=5 Similarity=0.768889  
 16 ATCCCCTTTTCGCAG  
 WB235\_2:14346519-14346611 Satlength=93 Nr of Repeats=6 RepeatLength=15  
 seed=TCCCCTTTTC Num.seqs=5 Similarity=0.768889  
 16 ATCCCCTTTTCGCAG  
 Rev.of\_WB235\_3:6013025-6013087 Satlength=63 Nr of Repeats=4  
 RepeatLength=15 seed=CGAAAAGGGG Num.seqs=3 Similarity=0.762963  
 27 ATCCCCTTTTCGCAG  
 WB235\_3:6013262-6013339 Satlength=78 Nr of Repeats=5 RepeatLength=15  
 seed=TCCCCTTTTC Num.seqs=4 Similarity=0.748148  
 16 ATCCCCTTTTCGCAG  
 WB235\_3:6551695-6551771 Satlength=77 Nr of Repeats=5 RepeatLength=15  
 seed=TCCCCTTTTC Num.seqs=4 Similarity=0.748148  
 16 ATCCCCTTTTCGCAG  
 Rev.of\_WB235\_3:7708654-7708716 Satlength=63 Nr of Repeats=4  
 RepeatLength=15 seed=CGAAAAGGGG Num.seqs=3 Similarity=0.762963  
 27 ATCCCCTTTTCGCAG  
 WB235\_3:10123694-10123786 Satlength=93 Nr of Repeats=5 RepeatLength=15  
 seed=TCCCCTTTTC Num.seqs=3 Similarity=0.762963  
 16 ATCCCCTTTTCGCAG

Rev.of\_WB235\_3:10436267-10436329 Satlength=63 Nr of Repeats=4  
 RepeatLength=15 seed=CGAAAAGGGG Num.seqs=3 Similarity=0.762963  
 27 ATCCCCTTTTCGCAG  
 WB235\_3:10811336-10811411 Satlength=76 Nr of Repeats=5 RepeatLength=15  
 seed=TCCCCTTTTC Num.seqs=5 Similarity=0.751111  
 16 ATCCCCTTTTCGCAG  
 WB235\_3:12878285-12878362 Satlength=78 Nr of Repeats=5 RepeatLength=15  
 seed=TCCCCTTTTC Num.seqs=4 Similarity=0.777778  
 16 ATCCCCTTTTCGCAG  
 WB235\_4:385463-385525 Satlength=63 Nr of Repeats=4 RepeatLength=15  
 seed=TCCCCTTTTC Num.seqs=3 Similarity=0.762963  
 16 ATCCCCTTTTCGCAG  
 Rev.of\_WB235\_4:1715069-1715131 Satlength=63 Nr of Repeats=4  
 RepeatLength=15 seed=CGAAAAGGGG Num.seqs=3 Similarity=0.703704  
 27 ATCCCCTTTTCGCAG  
 WB235\_4:11179242-11179304 Satlength=63 Nr of Repeats=4 RepeatLength=15  
 seed=TCCCCTTTTC Num.seqs=3 Similarity=0.762963  
 16 ATCCCCTTTTCGCAG  
 WB235\_4:15199820-15199897 Satlength=78 Nr of Repeats=5 RepeatLength=15  
 seed=TCCCCTTTTC Num.seqs=4 Similarity=0.748148  
 16 ATCCCCTTTTCGCAG  
 WB235\_5:4553148-4553225 Satlength=78 Nr of Repeats=5 RepeatLength=15  
 seed=CCCCTTTTCG Num.seqs=4 Similarity=0.748148  
 17 ATCCCCTTTTCGCAG  
 WB235\_5:16553018-16553153 Satlength=136 Nr of Repeats=7 RepeatLength=15  
 seed=GCAGATCCCC Num.seqs=6 Similarity=0.946667  
 26 ATCCCCTTTTCGCAG  
 Rev.of\_WB235\_5:20839492-20839569 Satlength=78 Nr of Repeats=5  
 RepeatLength=15 seed=CGAAAAGGGG Num.seqs=4 Similarity=0.822222  
 27 ATCCCCTTTTCGCAG  
 WB235\_5:20839745-20839822 Satlength=78 Nr of Repeats=5 RepeatLength=15  
 seed=CCCCTTTTCG Num.seqs=4 Similarity=0.748148  
 17 ATCCCCTTTTCGCAG  
 Rev.of\_WB235\_6:256843-256905 Satlength=63 Nr of Repeats=4 RepeatLength=15  
 seed=CGAAAAGGGG Num.seqs=3 Similarity=0.762963  
 27 ATCCCCTTTTCGCAG  
 Rev.of\_WB235\_3:10123441-10123519 Satlength=79 Nr of Repeats=5  
 RepeatLength=15 seed=CGAAAAGGGG Num.seqs=3 Similarity=0.733333  
 27 ATCCCCTTTTCGNAG  
 WB235\_6:257079-257156 Satlength=78 Nr of Repeats=5 RepeatLength=15  
 seed=TCCCCTTTTC Num.seqs=4 Similarity=0.762963  
 16 ATCCCCTTTTCGTAG  
 Rev.of\_WB235\_1:12899142-12899606 Satlength=465 Nr of Repeats=31  
 RepeatLength=15 seed=AAAAGGGGAT Num.seqs=28 Similarity=0.945444  
 25 ATCCCCTTTTTCGAG  
 Rev.of\_WB235\_1:7003581-7003641 Satlength=61 Nr of Repeats=4  
 RepeatLength=15 seed=CGAAAAGGGG Num.seqs=4 Similarity=0.807407  
 27 ATCCCCTTTTCGCTG

\*\*     \*\*\*\*   \*

Consensus:

cTCCCCTTTTCGtAG



>WB235\_Fam\_8\_16\_50 Nr. of seq. 50 Alignment length(with gaps) = 16  
 Alignment score = 0.867364  
 WB235\_1:11273722-11273834 Satlength=113 Nr of Repeats=7 RepeatLength=16  
 seed=CTACATGCCT Num.seqs=7 Similarity=0.805556  
 0 CTACATGCCTACATGC  
 WB235\_1:11273722-11274842 Satlength=1121 Nr of Repeats=68 RepeatLength=16  
 seed=CTACATGCCT Num.seqs=64 Similarity=0.868304  
 0 CTACATGCCTACATGC  
 Rev.of\_WB235\_1:11656920-11657791 Satlength=872 Nr of Repeats=54  
 RepeatLength=16 seed=GCATGTAGGC Num.seqs=52 Similarity=0.946833  
 0 CTACATGCCTACATGC  
 WB235\_2:12978404-12978548 Satlength=145 Nr of Repeats=9 RepeatLength=16  
 seed=GCCTACATGC Num.seqs=7 Similarity=0.861111  
 6 CTACATGCCTACATGC  
 Rev.of\_WB235\_2:13304324-13304580 Satlength=257 Nr of Repeats=15  
 RepeatLength=16 seed=GGCATGTAGG Num.seqs=13 Similarity=0.840812  
 1 CTACATGCCTACATGC  
 Rev.of\_WB235\_2:13310035-13310356 Satlength=322 Nr of Repeats=20  
 RepeatLength=16 seed=GGCATGTAGG Num.seqs=19 Similarity=0.773879  
 1 CTACATGCCTACATGC  
 WB235\_2:13507307-13507403 Satlength=97 Nr of Repeats=6 RepeatLength=16  
 seed=ACATGCCTAC Num.seqs=6 Similarity=0.888889  
 2 CTACATGCCTACATGC  
 WB235\_2:13631132-13631348 Satlength=217 Nr of Repeats=13 RepeatLength=16  
 seed=ACATGCCTAC Num.seqs=12 Similarity=0.958333  
 2 CTACATGCCTACATGC  
 Rev.of\_WB235\_3:3746895-3747055 Satlength=161 Nr of Repeats=10  
 RepeatLength=16 seed=TAGGCATGTA Num.seqs=10 Similarity=0.920370  
 3 CTACATGCCTACATGC  
 Rev.of\_WB235\_4:594389-594607 Satlength=219 Nr of Repeats=10  
 RepeatLength=16 seed=AGGCATGTAG Num.seqs=9 Similarity=0.796296  
 2 CTACATGCCTACATGC  
 Rev.of\_WB235\_4:2953071-2953413 Satlength=343 Nr of Repeats=19  
 RepeatLength=16 seed=TAGGCATGTA Num.seqs=16 Similarity=0.859028  
 3 CTACATGCCTACATGC  
 WB235\_4:3184703-3185093 Satlength=391 Nr of Repeats=5 RepeatLength=16  
 seed=TACATGCCTA Num.seqs=4 Similarity=0.958333  
 1 CTACATGCCTACATGC  
 WB235\_4:3189159-3189343 Satlength=185 Nr of Repeats=11 RepeatLength=16  
 seed=CATGCCTACA Num.seqs=10 Similarity=0.816667  
 3 CTACATGCCTACATGC  
 WB235\_4:3193096-3194818 Satlength=1723 Nr of Repeats=67 RepeatLength=16  
 seed=ATGCCTACAT Num.seqs=46 Similarity=0.819565  
 4 CTACATGCCTACATGC  
 Rev.of\_WB235\_4:3211749-3211845 Satlength=97 Nr of Repeats=6  
 RepeatLength=16 seed=AGGCATGTAG Num.seqs=6 Similarity=0.872222  
 2 CTACATGCCTACATGC  
 WB235\_4:3568013-3568493 Satlength=481 Nr of Repeats=28 RepeatLength=16  
 seed=TGCCTACATG Num.seqs=23 Similarity=0.914032  
 5 CTACATGCCTACATGC  
 Rev.of\_WB235\_4:3825814-3826008 Satlength=195 Nr of Repeats=12  
 RepeatLength=16 seed=TAGGCATGTA Num.seqs=10 Similarity=0.983333  
 3 CTACATGCCTACATGC

WB235\_5:335210-335330 Satlength=121 Nr of Repeats=7 RepeatLength=16  
 seed=CATGCCTACA Num.seqs=6 Similarity=0.972222  
 3 CTACATGCCTACATGC  
 Rev.of\_WB235\_5:342974-343198 Satlength=225 Nr of Repeats=14  
 RepeatLength=16 seed=GGCATGTAGG Num.seqs=14 Similarity=0.928571  
 1 CTACATGCCTACATGC  
 WB235\_5:777315-777395 Satlength=81 Nr of Repeats=5 RepeatLength=16  
 seed=CTACATGCCT Num.seqs=5 Similarity=0.933333  
 0 CTACATGCCTACATGC  
 Rev.of\_WB235\_5:777834-778359 Satlength=526 Nr of Repeats=12  
 RepeatLength=16 seed=AGGCATGTAG Num.seqs=9 Similarity=0.907407  
 2 CTACATGCCTACATGC  
 Rev.of\_WB235\_5:779287-779455 Satlength=169 Nr of Repeats=10  
 RepeatLength=16 seed=AGGCATGTAG Num.seqs=9 Similarity=0.944444  
 2 CTACATGCCTACATGC  
 WB235\_5:885274-885474 Satlength=201 Nr of Repeats=12 RepeatLength=16  
 seed=ATGCCTACAT Num.seqs=11 Similarity=0.956061  
 4 CTACATGCCTACATGC  
 WB235\_5:2164618-2164730 Satlength=113 Nr of Repeats=6 RepeatLength=16  
 seed=ATGCCTACAT Num.seqs=4 Similarity=0.875000  
 4 CTACATGCCTACATGC  
 Rev.of\_WB235\_5:4784597-4784789 Satlength=193 Nr of Repeats=11  
 RepeatLength=16 seed=TAGGCATGTA Num.seqs=9 Similarity=0.944444  
 3 CTACATGCCTACATGC  
 Rev.of\_WB235\_5:3085214-3085707 Satlength=494 Nr of Repeats=4  
 RepeatLength=16 seed=GCATGTAGGC Num.seqs=3 Similarity=0.944444  
 0 CTACAAGCCTACATGC  
 WB235\_3:11475344-11475488 Satlength=145 Nr of Repeats=7 RepeatLength=16  
 seed=TACAAGCCTA Num.seqs=5 Similarity=0.866667  
 1 CTACAAGCCTACAAGC  
 WB235\_2:674091-674259 Satlength=169 Nr of Repeats=9 RepeatLength=16  
 seed=CCTACGTGCC Num.seqs=6 Similarity=0.844444  
 7 CTACGTGCCTACGTGC  
 Rev.of\_WB235\_2:2761987-2762171 Satlength=185 Nr of Repeats=11  
 RepeatLength=16 seed=CACGTAGGCA Num.seqs=10 Similarity=0.966667  
 7 CTACGTGCCTACGTGC  
 Rev.of\_WB235\_2:3124197-3124357 Satlength=161 Nr of Repeats=9  
 RepeatLength=16 seed=TAGGCACGTA Num.seqs=7 Similarity=0.849206  
 11 CTACGTGCCTACGTGC  
 WB235\_2:3125607-3125959 Satlength=353 Nr of Repeats=18 RepeatLength=16  
 seed=TACGTGCCTA Num.seqs=12 Similarity=0.845960  
 9 CTACGTGCCTACGTGC  
 Rev.of\_WB235\_2:3179723-3180290 Satlength=568 Nr of Repeats=21  
 RepeatLength=16 seed=GTAGGCACGT Num.seqs=18 Similarity=0.936819  
 12 CTACGTGCCTACGTGC  
 Rev.of\_WB235\_2:3271556-3272244 Satlength=689 Nr of Repeats=42  
 RepeatLength=16 seed=CGTAGGCACG Num.seqs=38 Similarity=0.966809  
 13 CTACGTGCCTACGTGC  
 Rev.of\_WB235\_2:3420081-3420246 Satlength=166 Nr of Repeats=5  
 RepeatLength=16 seed=GCACGTAGGC Num.seqs=3 Similarity=0.944444  
 8 CTACGTGCCTACGTGC  
 Rev.of\_WB235\_2:3512519-3512671 Satlength=153 Nr of Repeats=9  
 RepeatLength=16 seed=GTAGGCACGT Num.seqs=8 Similarity=0.958333  
 12 CTACGTGCCTACGTGC

WB235\_2:4030891-4031711 Satlength=821 Nr of Repeats=4 RepeatLength=16  
seed=TGCCTACGTG Num.seqs=3 Similarity=1.000000  
13 CTACGTGCCTACGTGC  
Rev.of\_WB235\_2:13061749-13061893 Satlength=145 Nr of Repeats=8  
RepeatLength=16 seed=TAGGCACGTA Num.seqs=6 Similarity=0.916667  
11 CTACGTGCCTACGTGC  
Rev.of\_WB235\_3:8334779-8334979 Satlength=201 Nr of Repeats=12  
RepeatLength=16 seed=AGGCACGTAG Num.seqs=11 Similarity=0.887879  
10 CTACGTGCCTACGTGC  
Rev.of\_WB235\_3:10480990-10481350 Satlength=361 Nr of Repeats=14  
RepeatLength=16 seed=TAGGCACGTA Num.seqs=13 Similarity=0.961538  
11 CTACGTGCCTACGTGC  
Rev.of\_WB235\_3:12190449-12190847 Satlength=399 Nr of Repeats=13  
RepeatLength=16 seed=ACGTAGGCAC Num.seqs=10 Similarity=0.916667  
14 CTACGTGCCTACGTGC  
Rev.of\_WB235\_4:1762607-1762703 Satlength=97 Nr of Repeats=5  
RepeatLength=16 seed=CACGTAGGCA Num.seqs=4 Similarity=0.916667  
7 CTACGTGCCTACGTGC  
Rev.of\_WB235\_4:1787801-1788241 Satlength=441 Nr of Repeats=26  
RepeatLength=16 seed=TAGGCACGTA Num.seqs=23 Similarity=0.944005  
11 CTACGTGCCTACGTGC  
WB235\_4:5060074-5060274 Satlength=201 Nr of Repeats=12 RepeatLength=16  
seed=CTACGTGCCT Num.seqs=11 Similarity=0.969697  
8 CTACGTGCCTACGTGC  
WB235\_4:12326778-12327098 Satlength=321 Nr of Repeats=18 RepeatLength=16  
seed=GTGCCCTACGT Num.seqs=14 Similarity=0.887363  
12 CTACGTGCCTACGTGC  
Rev.of\_WB235\_2:3152725-3152861 Satlength=137 Nr of Repeats=8  
RepeatLength=16 seed=AGGCACGTAG Num.seqs=7 Similarity=0.853175  
10 CTACGTGCCTACNTGC  
Rev.of\_WB235\_2:14108714-14108890 Satlength=177 Nr of Repeats=10  
RepeatLength=16 seed=TAGGCATATA Num.seqs=9 Similarity=0.842593  
3 CTATATGCCTATATGC  
WB235\_3:3647083-3647155 Satlength=73 Nr of Repeats=4 RepeatLength=16  
seed=CCTACATACC Num.seqs=3 Similarity=0.888889  
7 CTACATACCTACATAC  
WB235\_5:16699106-16699538 Satlength=433 Nr of Repeats=26 RepeatLength=16  
seed=ACATACCTAC Num.seqs=24 Similarity=0.960145  
10 CTACATACCTACATAC  
Rev.of\_WB235\_3:206747-206867 Satlength=121 Nr of Repeats=7  
RepeatLength=16 seed=TAGGCATCTA Num.seqs=6 Similarity=0.827778  
3 CTAGGTGCATAGATGC  
Rev.of\_WB235\_4:2981693-2981773 Satlength=81 Nr of Repeats=4  
RepeatLength=16 seed=AGGTAGGAAG Num.seqs=3 Similarity=0.722222  
2 CTACCTACCTTCCTAC

\*\*\* \* \* \*

Consensus:

CTACaTGCCTACaTGC

>WB235\_Fam\_9\_20\_46 Nr. of seq. 46 Alignment length(with gaps) = 20  
Alignment score = 0.797488

WB235\_1:2542918-2543982 Satlength=1065 Nr of Repeats=56 RepeatLength=19  
 seed=TGTTACACGA Num.seqs=56 Similarity=0.965915  
 0 TGTTACACG-AAAAATAGAT  
 Rev.of\_WB235\_1:4465416-4465569 Satlength=154 Nr of Repeats=8  
 RepeatLength=19 seed=TTTTTCGTGT Num.seqs=7 Similarity=0.900000  
 14 TGTTACACG-AAAAATAGAT  
 Rev.of\_WB235\_1:14128159-14128469 Satlength=311 Nr of Repeats=16  
 RepeatLength=19 seed=AACAATCTAT Num.seqs=10 Similarity=1.000000  
 4 TGTTACACG-AAAAATAGAT  
 WB235\_3:3987076-3987676 Satlength=601 Nr of Repeats=31 RepeatLength=19  
 seed=AAAAATAGAT Num.seqs=20 Similarity=1.000000  
 9 TGTTACACG-AAAAATAGAT  
 WB235\_3:6185212-6186090 Satlength=879 Nr of Repeats=42 RepeatLength=19  
 seed=AAAAATAGAT Num.seqs=38 Similarity=0.969155  
 9 TGTTACACG-AAAAATAGAT  
 Rev.of\_WB235\_3:7668665-7669197 Satlength=533 Nr of Repeats=28  
 RepeatLength=19 seed=AATCTATTTT Num.seqs=28 Similarity=0.920040  
 1 TGTTACACG-AAAAATAGAT  
 Rev.of\_WB235\_3:7678163-7678429 Satlength=267 Nr of Repeats=14  
 RepeatLength=19 seed=CAATCTATTT Num.seqs=14 Similarity=0.974552  
 2 TGTTACACG-AAAAATAGAT  
 WB235\_3:13243432-13245239 Satlength=1808 Nr of Repeats=95 RepeatLength=19  
 seed=AAAAATAGAT Num.seqs=93 Similarity=0.938765  
 9 TGTTACACG-AAAAATAGAT  
 WB235\_4:10681773-10682153 Satlength=381 Nr of Repeats=20 RepeatLength=19  
 seed=ATTGTTACAC Num.seqs=20 Similarity=0.974146  
 17 TGTTACACG-AAAAATAGAT  
 WB235\_4:16963408-16964890 Satlength=1483 Nr of Repeats=77 RepeatLength=19  
 seed=AAAAATAGAT Num.seqs=58 Similarity=0.957844  
 9 TGTTACACG-AAAAATAGAT  
 Rev.of\_WB235\_5:6937435-6937626 Satlength=192 Nr of Repeats=10  
 RepeatLength=19 seed=AACAATCTAT Num.seqs=9 Similarity=1.000000  
 4 TGTTACACG-AAAAATAGAT  
 WB235\_5:13365913-13366445 Satlength=533 Nr of Repeats=28 RepeatLength=19  
 seed=GTTCACGAA Num.seqs=28 Similarity=0.981064  
 1 TGTTACACG-AAAAATAGAT  
 Rev.of\_WB235\_5:17412072-17412375 Satlength=304 Nr of Repeats=16  
 RepeatLength=19 seed=TTTTTCGTGTA Num.seqs=15 Similarity=0.934503  
 13 TGTTACACG-AAAAATAGAT  
 Rev.of\_WB235\_6:3007216-3008016 Satlength=801 Nr of Repeats=42  
 RepeatLength=19 seed=GTGTAACAAT Num.seqs=31 Similarity=0.982192  
 8 TGTTACACG-AAAAATAGAT  
 WB235\_6:12276123-12276239 Satlength=117 Nr of Repeats=6 RepeatLength=19  
 seed=ATAGATTGTT Num.seqs=4 Similarity=1.000000  
 13 TGTTACACG-AAAAATAGAT  
 WB235\_6:12502706-12502822 Satlength=117 Nr of Repeats=6 RepeatLength=19  
 seed=AAAAATAGAT Num.seqs=4 Similarity=0.894737  
 9 TGTTACACG-AAAAATAGAT  
 WB235\_4:16244112-16245385 Satlength=1274 Nr of Repeats=65 RepeatLength=19  
 seed=AAATAGATTG Num.seqs=45 Similarity=0.932093  
 11 TGTTACACG-GAAAATAGAT  
 WB235\_1:11357272-11357373 Satlength=102 Nr of Repeats=5 RepeatLength=20  
 seed=AATAGATTGT Num.seqs=4 Similarity=0.933333  
 13 TGTTACACGAAAAATAGAT

WB235\_1:13276960-13277319 Satlength=360 Nr of Repeats=18 RepeatLength=20  
 seed=AAAAATAGATT Num.seqs=17 Similarity=0.992157  
 31 TGTTACACGAAAAAATAGAT  
 WB235\_3:10796467-10796566 Satlength=100 Nr of Repeats=5 RepeatLength=20  
 seed=GTTACACGAA Num.seqs=4 Similarity=1.000000  
 21 TGTTACACGAAAAAATAGAT  
 WB235\_4:15859222-15859379 Satlength=158 Nr of Repeats=8 RepeatLength=20  
 seed=TGTTACACGA Num.seqs=5 Similarity=1.000000  
 20 TGTTACACGAAAAAATAGAT  
 WB235\_5:18400360-18401785 Satlength=1426 Nr of Repeats=72 RepeatLength=20  
 seed=AAAAATAGAT Num.seqs=57 Similarity=0.937761  
 30 TGTTACACGAAAAAATAGAT  
 WB235\_5:18727688-18728599 Satlength=912 Nr of Repeats=46 RepeatLength=20  
 seed=AAAAATAGAT Num.seqs=37 Similarity=1.000000  
 30 TGTTACACGAAAAAATAGAT  
 WB235\_6:1945521-1946157 Satlength=637 Nr of Repeats=32 RepeatLength=20  
 seed=GTTACACGAA Num.seqs=28 Similarity=1.000000  
 21 TGTTACACGAAAAAATAGAT  
 WB235\_6:1954050-1954308 Satlength=259 Nr of Repeats=13 RepeatLength=20  
 seed=GTTACACGAA Num.seqs=11 Similarity=1.000000  
 21 TGTTACACGAAAAAATAGAT  
 Rev.of\_WB235\_6:14154417-14154672 Satlength=256 Nr of Repeats=13  
 RepeatLength=20 seed=TAACAATCTA Num.seqs=8 Similarity=0.966667  
 25 TGTTACACGAAAAAATAGAT  
 Rev.of\_WB235\_6:15811201-15811280 Satlength=80 Nr of Repeats=4  
 RepeatLength=20 seed=TAACAATCTA Num.seqs=3 Similarity=0.955556  
 25 TGTTACACGAAAAAATAGAT  
 WB235\_2:3994649-3994788 Satlength=140 Nr of Repeats=7 RepeatLength=20  
 seed=AAATAGATTG Num.seqs=6 Similarity=0.964444  
 32 TGTTACACTAAAAAATAGAT  
 WB235\_4:6210092-6210227 Satlength=136 Nr of Repeats=7 RepeatLength=19  
 seed=ATTGACAGAC Num.seqs=5 Similarity=0.971930  
 17 TGACAGACG-AAAAATAGAT  
 WB235\_4:12584972-12585067 Satlength=96 Nr of Repeats=5 RepeatLength=19  
 seed=AAAAATAGAT Num.seqs=5 Similarity=0.971930  
 28 TGACAGACG-AAAAATAGAT  
 Rev.of\_WB235\_5:3098854-3099539 Satlength=686 Nr of Repeats=35  
 RepeatLength=19 seed=AATCTATTTT Num.seqs=24 Similarity=0.944826  
 20 TGACAGACG-AAAAATAGAT  
 WB235\_5:5646992-5647147 Satlength=156 Nr of Repeats=8 RepeatLength=19  
 seed=AAAAATAGAT Num.seqs=5 Similarity=1.000000  
 28 TGGCAGACG-AAAAATAGAT  
 WB235\_3:1260242-1261618 Satlength=1377 Nr of Repeats=70 RepeatLength=20  
 seed=AAAAATAGAT Num.seqs=42 Similarity=0.907822  
 29 TGACAGACGAAAAAATAGAT  
 WB235\_3:12009165-12009381 Satlength=217 Nr of Repeats=11 RepeatLength=20  
 seed=AAATAGATTG Num.seqs=7 Similarity=0.904762  
 31 TGACAGACGAAAAAATAGAT  
 WB235\_6:4285394-4285533 Satlength=140 Nr of Repeats=7 RepeatLength=20  
 seed=ACAGACGAAA Num.seqs=6 Similarity=0.937778  
 41 TGACAGACGAAAAAATAGAT  
 Rev.of\_WB235\_6:7081038-7081216 Satlength=179 Nr of Repeats=9  
 RepeatLength=20 seed=TTTTTCGTCT Num.seqs=7 Similarity=0.961905  
 33 TGACAGACGAAAAAATAGAT

WB235\_6:7895537-7895652 Satlength=116 Nr of Repeats=6 RepeatLength=19  
seed=CAGACGAAAA Num.seqs=5 Similarity=0.887719  
22 TGGCAGACG-AAAAATATAT  
WB235\_1:3485156-3487576 Satlength=2421 Nr of Repeats=121 RepeatLength=20  
seed=AAAAAATAGA Num.seqs=121 Similarity=0.970083  
28 TGACATACCAAAAAATAGAT  
WB235\_1:13925940-13926100 Satlength=161 Nr of Repeats=8 RepeatLength=20  
seed=AAAAAATAGA Num.seqs=8 Similarity=0.900000  
28 TGACATACCAAAAAATAGAT  
WB235\_3:9940544-9940665 Satlength=122 Nr of Repeats=6 RepeatLength=20  
seed=TGACATACCA Num.seqs=5 Similarity=0.973333  
39 TGACATACCAAAAAATAGAT  
Rev.of\_WB235\_3:11004687-11006367 Satlength=1681 Nr of Repeats=84  
RepeatLength=20 seed=TCTATTTTTT Num.seqs=84 Similarity=0.960031  
38 TGACATACCAAAAAATAGAT  
WB235\_6:3924546-3924685 Satlength=140 Nr of Repeats=7 RepeatLength=20  
seed=AAAATAGATT Num.seqs=6 Similarity=0.955556  
30 TGACATACCAAAAAATAGAT  
Rev.of\_WB235\_2:887413-887570 Satlength=158 Nr of Repeats=8  
RepeatLength=20 seed=CAATCTATTT Num.seqs=6 Similarity=0.902222  
41 TGNCATACCAAAAAATAGAT  
WB235\_6:15806999-15807439 Satlength=441 Nr of Repeats=22 RepeatLength=20  
seed=CATACCAAAA Num.seqs=22 Similarity=0.934488  
42 TGGCATACCAAAAAATAGAT  
WB235\_2:11423462-11423661 Satlength=200 Nr of Repeats=9 RepeatLength=20  
seed=AAAAAATAGA Num.seqs=8 Similarity=0.892857  
28 TGGCATACGAAAAAATAGAT  
WB235\_1:14321889-14321969 Satlength=81 Nr of Repeats=4 RepeatLength=20  
seed=ATATCAAAAA Num.seqs=4 Similarity=0.855556  
43 TGGCATATCAAAAAATAAAT

\*\* \* \* \*\*\*\*\* \*\*

Consensus:

TGttAcACGaAAAAATAGAT

>WB235\_Fam\_10\_25\_40 Nr. of seq. 40 Alignment length(with gaps) = 28  
Alignment score = 0.748245  
WB235\_1:3763157-3765957 Satlength=2801 Nr of Repeats=112 RepeatLength=25  
seed=TTTACTCTCT Num.seqs=112 Similarity=0.895307  
0 TTTACTCTCT--GGC-TTCACCAAATAT  
Rev.of\_WB235\_6:10361494-10369166 Satlength=7673 Nr of Repeats=299  
RepeatLength=25 seed=GTGAAGCCAG Num.seqs=291 Similarity=0.913572  
18 TTTACTCTCT--GGC-TTCACCAAATAT  
Rev.of\_WB235\_2:5144410-5146766 Satlength=2357 Nr of Repeats=80  
RepeatLength=25 seed=AGCCAGAGAG Num.seqs=74 Similarity=0.877056  
14 TTTACTCTCT--GGC-TTCACCAATTAT  
Rev.of\_WB235\_3:1299759-1303117 Satlength=3359 Nr of Repeats=134  
RepeatLength=25 seed=CAGAGAGTAA Num.seqs=126 Similarity=0.920857  
36 TTTACTCTCT--GGC-TTCACCAATTAT  
Rev.of\_WB235\_2:4259952-4260552 Satlength=601 Nr of Repeats=24  
RepeatLength=25 seed=GAGAGTAAAA Num.seqs=24 Similarity=0.932560  
9 TTTACTCTCT--GGC-TTCACCGTATAT

WB235\_4:17492409-17493609 Satlength=1201 Nr of Repeats=48 RepeatLength=25  
 seed=ACTCTCTGGC Num.seqs=48 Similarity=0.888227  
 28 TTTACTCTCT--GGC-TTCACCGTATAT  
 Rev.of\_WB235\_3:2497037-2501716 Satlength=4680 Nr of Repeats=187  
 RepeatLength=25 seed=GTGAAGCCAG Num.seqs=184 Similarity=0.887060  
 18 TTTACTCTCT--GGC-TTCACCATATAT  
 WB235\_2:9404845-9405392 Satlength=548 Nr of Repeats=22 RepeatLength=25  
 seed=GGCTTCACAG Num.seqs=20 Similarity=0.925053  
 10 TTTACTCTCT--GGC-TTCACAGTATAT  
 WB235\_4:5299099-5299474 Satlength=376 Nr of Repeats=15 RepeatLength=25  
 seed=TTTACTCTCT Num.seqs=15 Similarity=0.890286  
 25 TTTACTCTCT--GGC-TTCACAGTATAT  
 Rev.of\_WB235\_5:7993172-7993472 Satlength=301 Nr of Repeats=12  
 RepeatLength=25 seed=CCAGAGAGTA Num.seqs=12 Similarity=0.873131  
 12 TTTACTCTCT--GGC-TTCACAGTATAT  
 WB235\_5:10449424-10450674 Satlength=1251 Nr of Repeats=50 RepeatLength=25  
 seed=TTTACTCTCT Num.seqs=50 Similarity=0.898601  
 25 TTTACTCTCT--GGC-TTCACAGTATAT  
 Rev.of\_WB235\_6:9184992-9188750 Satlength=3759 Nr of Repeats=150  
 RepeatLength=25 seed=CAGAGAGTAA Num.seqs=149 Similarity=0.922331  
 11 TTTACTCTCT--GGC-TTCACAGTATAT  
 WB235\_6:2055472-2055647 Satlength=176 Nr of Repeats=7 RepeatLength=25  
 seed=TATATTTTAC Num.seqs=7 Similarity=0.852698  
 20 TTTACTCTCT--GGC-TTCACANTATAT  
 WB235\_6:2056950-2057275 Satlength=326 Nr of Repeats=12 RepeatLength=25  
 seed=TCTGGCTTCA Num.seqs=11 Similarity=0.885576  
 32 TTTACTCTCT--GGC-TTCACACTATAT  
 WB235\_6:14908166-14909416 Satlength=1251 Nr of Repeats=49 RepeatLength=25  
 seed=TGGCTTCACA Num.seqs=48 Similarity=0.906856  
 34 TTTACTCTCT--GGC-TTCACAATATAT  
 WB235\_6:11886530-11888254 Satlength=1725 Nr of Repeats=68 RepeatLength=25  
 seed=TTCAACATAT Num.seqs=64 Similarity=0.956852  
 13 TTTACTCTCT--GGC-TTCACCATATAT  
 Rev.of\_WB235\_1:6771968-6773943 Satlength=1976 Nr of Repeats=79  
 RepeatLength=25 seed=GTGAAGCCAG Num.seqs=69 Similarity=0.904109  
 18 TTTACTCTCT--GGC-TTCACAGAATAA  
 WB235\_4:6090427-6090577 Satlength=151 Nr of Repeats=6 RepeatLength=25  
 seed=TTTACTCTCT Num.seqs=6 Similarity=0.882667  
 25 TTTACTCTCT--GGC-TTCACAGAATAA  
 Rev.of\_WB235\_5:14750559-14751884 Satlength=1326 Nr of Repeats=53  
 RepeatLength=25 seed=TGTGAAGCCA Num.seqs=53 Similarity=0.918336  
 19 TTTACTCTCT--GGC-TTCACAGAATAA  
 WB235\_4:13360500-13361979 Satlength=1480 Nr of Repeats=59 RepeatLength=25  
 seed=TTTACTCTCT Num.seqs=56 Similarity=0.877229  
 25 TTTACTCTCT--GGC-TTCACAGAATAT  
 Rev.of\_WB235\_5:4333269-4336644 Satlength=3376 Nr of Repeats=135  
 RepeatLength=25 seed=AGAGTAAAAT Num.seqs=135 Similarity=0.922491  
 33 TTTACTCTCT--GGC-TTCACAGAATAT  
 WB235\_6:13981254-13981504 Satlength=251 Nr of Repeats=10 RepeatLength=25  
 seed=TCTCTGGCTT Num.seqs=10 Similarity=0.913481  
 30 TTTACTCTCT--GGC-TTCACAGAATAT  
 WB235\_2:12844903-12846136 Satlength=1234 Nr of Repeats=49 RepeatLength=25  
 seed=GGCTTCCCAC Num.seqs=45 Similarity=0.990626  
 10 TTTACTCTCT--GGC-TTCCCACTATAT

WB235\_1:933478-934899 Satlength=1422 Nr of Repeats=52 RepeatLength=27  
seed=TATTTTACTC Num.seqs=46 Similarity=0.859742  
22 TTTACTCTCTGTGGC-TTCCCACTATAT  
WB235\_2:3290648-3290783 Satlength=136 Nr of Repeats=5 RepeatLength=27  
seed=TTTACTCTCT Num.seqs=5 Similarity=1.000000  
25 TTTACTCTCTGTGGC-TTCCCACTATAT  
WB235\_2:14337687-14339240 Satlength=1554 Nr of Repeats=57 RepeatLength=27  
seed=GGCTTCCCAC Num.seqs=48 Similarity=0.918571  
37 TTTACTCTCTGTGGC-TTCCCACTATAT  
Rev.of\_WB235\_3:931250-931684 Satlength=435 Nr of Repeats=16  
RepeatLength=27 seed=AGAGAGTAAA Num.seqs=15 Similarity=0.926631  
35 TTTACTCTCTGTGGC-TTCCCACTATAT  
Rev.of\_WB235\_3:7444445-7448204 Satlength=3760 Nr of Repeats=143  
RepeatLength=27 seed=ACAGAGAGTA Num.seqs=126 Similarity=0.934432  
37 TTTACTCTCTGTGGC-TTCCCACTATAT  
Rev.of\_WB235\_6:109717-114226 Satlength=4510 Nr of Repeats=167  
RepeatLength=27 seed=CACAGAGAGT Num.seqs=167 Similarity=0.846944  
38 TTTACTCTCTGTGGC-TTCCCACTATAT  
WB235\_6:5056273-5057278 Satlength=1006 Nr of Repeats=38 RepeatLength=27  
seed=TATTTTACTC Num.seqs=31 Similarity=0.933897  
22 TTTACTCTCTGTGGC-TTCCCACTATAT  
WB235\_5:14754513-14757536 Satlength=3024 Nr of Repeats=84 RepeatLength=27  
seed=CTGTGGCTTC Num.seqs=77 Similarity=0.911293  
33 TTTACTCTCTGTGGC-TTCCCACCATAT  
WB235\_6:1752278-1755168 Satlength=2891 Nr of Repeats=107 RepeatLength=27  
seed=ACTCTCTGTG Num.seqs=106 Similarity=0.943527  
55 TTTACTCTCTGTGGC-TTCCCACCATAT  
Rev.of\_WB235\_2:12843822-12844875 Satlength=1054 Nr of Repeats=39  
RepeatLength=27 seed=GTGGGAAGCC Num.seqs=39 Similarity=0.975075  
47 TTTACTCTCTATGGC-TTCCCACTATAT  
Rev.of\_WB235\_5:14768011-14769734 Satlength=1724 Nr of Repeats=59  
RepeatLength=27 seed=GGAAGCCACA Num.seqs=57 Similarity=0.946781  
17 TTTACTCTCTGTGGC-TTCCAACCATAT  
WB235\_5:1104557-1105016 Satlength=460 Nr of Repeats=17 RepeatLength=27  
seed=TTACTCTCTG Num.seqs=17 Similarity=0.900145  
26 TTTACTCTCTGTGGC-TTCACAGTATAT  
WB235\_3:3334358-3337083 Satlength=2726 Nr of Repeats=109 RepeatLength=25  
seed=ACTCTCTGGC Num.seqs=109 Similarity=0.899274  
28 TTTACTCTCT--GGC-TTCCCATCATAT  
Rev.of\_WB235\_4:5878242-5878392 Satlength=151 Nr of Repeats=6  
RepeatLength=25 seed=CCAGAGAGTA Num.seqs=6 Similarity=0.875556  
37 TTTACTCTCT--GGT-TTCCCACTATAT  
Rev.of\_WB235\_2:5144313-5144565 Satlength=253 Nr of Repeats=9  
RepeatLength=25 seed=AGAGTAAAAT Num.seqs=6 Similarity=0.823932  
8 TTTACTCTCT--GGCTTTCCCAAT-TAT  
WB235\_1:4544868-4547696 Satlength=2829 Nr of Repeats=104 RepeatLength=27  
seed=ACTCTCTGTG Num.seqs=100 Similarity=0.845700  
3 TTTACTCTCTGTGGC-TTCACCGATNAT  
Rev.of\_WB235\_4:2828548-2830536 Satlength=1989 Nr of Repeats=74  
RepeatLength=27 seed=CAGAGAGTAA Num.seqs=69 Similarity=0.869860  
11 TTTACTCTCTGTGGC-TTCACCAATTAT

\*\* \* \* \* \*    \*\*    \*\*\*            \*

Consensus :



TTTACTCTCTGGCTTCaCantATAT

>WB235\_Fam\_11\_20\_29 Nr. of seq. 29 Alignment length(with gaps) = 25  
Alignment score = 0.605057  
WB235\_1:354705-355291 Satlength=587 Nr of Repeats=29 RepeatLength=19  
seed=TATCGATTTT Num.seqs=25 Similarity=0.914854  
0 TATCGATTTT-C---TG-G-AATT  
Rev.of\_WB235\_5:19026746-19027590 Satlength=845 Nr of Repeats=33  
RepeatLength=20 seed=AAAATCGATA Num.seqs=22 Similarity=0.814643  
10 TATCGATTTT-C---TG-GAAATT  
WB235\_5:18984459-18985309 Satlength=851 Nr of Repeats=31 RepeatLength=20  
seed=ATTTATTGAT Num.seqs=20 Similarity=0.886667  
17 TATCGATTTT-C---TG-GAAATT  
WB235\_5:19112578-19114304 Satlength=1727 Nr of Repeats=66 RepeatLength=20  
seed=TATCGATTTT Num.seqs=59 Similarity=0.867212  
20 TATCGATTTT-C---TG-GAAATT  
WB235\_5:18993608-18993851 Satlength=244 Nr of Repeats=8 RepeatLength=20  
seed=TATCGATTTT Num.seqs=5 Similarity=0.900000  
20 TATCGATTTT-C---TG-CAAATT  
WB235\_5:19909526-19910097 Satlength=572 Nr of Repeats=12 RepeatLength=20  
seed=TTATTGATTT Num.seqs=8 Similarity=0.876190  
19 TATTGATTTT-A---TG-GAAATT  
Rev.of\_WB235\_1:1815369-1815789 Satlength=421 Nr of Repeats=18  
RepeatLength=19 seed=AAAATCAATA Num.seqs=14 Similarity=0.796414  
10 TATTGATTTT--C---TT-AGAATT  
Rev.of\_WB235\_1:1815369-1817144 Satlength=1776 Nr of Repeats=44  
RepeatLength=19 seed=AAAATCAATA Num.seqs=32 Similarity=0.769949  
10 TATTGATTTT--C---TN-NGAATT  
Rev.of\_WB235\_4:1740517-1740917 Satlength=401 Nr of Repeats=20  
RepeatLength=20 seed=CAGAAAAATC Num.seqs=20 Similarity=0.835088  
14 TATTGATTTT-C---TG-AGAATT  
WB235\_5:18632123-18632283 Satlength=161 Nr of Repeats=8 RepeatLength=20  
seed=GATTTTCTG Num.seqs=8 Similarity=0.871429  
24 TATTGATTTT-C---TG-AAAATT  
Rev.of\_WB235\_5:18675402-18675828 Satlength=427 Nr of Repeats=12  
RepeatLength=20 seed=AGAAAAATCA Num.seqs=8 Similarity=0.902381  
33 TATTGATTTT-C---TG-AAAATT  
Rev.of\_WB235\_5:18986276-18986397 Satlength=122 Nr of Repeats=6  
RepeatLength=20 seed=ATAAATTTTC Num.seqs=5 Similarity=0.960000  
43 TATTGATTTT-C---TG-AAAATT  
Rev.of\_WB235\_5:19099300-19100374 Satlength=1075 Nr of Repeats=31  
RepeatLength=20 seed=AAAAATCAAT Num.seqs=22 Similarity=0.750066  
31 TATTGATTTT-C---TG-AAAATT  
WB235\_5:19100422-19100868 Satlength=447 Nr of Repeats=10 RepeatLength=20  
seed=ATTGATTTT Num.seqs=8 Similarity=0.861905  
41 TATTGATTTT-C---TG-AAAATT  
WB235\_5:19129872-19130673 Satlength=802 Nr of Repeats=34 RepeatLength=20  
seed=GATTTTCTG Num.seqs=28 Similarity=0.875661  
24 TATTGATTTT-C---TG-AAAATT  
Rev.of\_WB235\_5:19101640-19102041 Satlength=402 Nr of Repeats=17  
RepeatLength=20 seed=CAGAAAAATC Num.seqs=12 Similarity=0.905051  
14 TATTGATTTT-C---TG-GAAATT

WB235\_5:19901870-19902110 Satlength=241 Nr of Repeats=10 RepeatLength=20  
seed=TTATTGATTT Num.seqs=8 Similarity=0.866667  
19 TATTGATTTTT-C---TG-GAAATT  
Rev.of\_WB235\_5:19907460-19907660 Satlength=201 Nr of Repeats=9  
RepeatLength=20 seed=CAGAAAAATC Num.seqs=8 Similarity=0.873810  
14 TATTGATTTTT-C---TG-GAAATT  
WB235\_5:19121195-19121753 Satlength=559 Nr of Repeats=25 RepeatLength=20  
seed=AATTTATTGA Num.seqs=16 Similarity=0.823333  
16 TATTGATTTTT-T---TG-GAAATT  
Rev.of\_WB235\_6:190303-190811 Satlength=509 Nr of Repeats=10  
RepeatLength=20 seed=AAAAATCAAT Num.seqs=9 Similarity=0.907407  
31 TATTGATTTTT-N---TG-GAAATT  
Rev.of\_WB235\_1:11485772-11485879 Satlength=108 Nr of Repeats=5  
RepeatLength=19 seed=TCAAAAATCA Num.seqs=4 Similarity=0.873611  
12 -ATTGATTTTT-GA--TG--AAATT  
Rev.of\_WB235\_1:11383715-11384049 Satlength=335 Nr of Repeats=14  
RepeatLength=20 seed=AAAAATCAAT Num.seqs=11 Similarity=0.883636  
29 -ATTGATTTTTCGA--TG--AAATT  
Rev.of\_WB235\_1:11485735-11486997 Satlength=1263 Nr of Repeats=20  
RepeatLength=19 seed=AAAAATCGAT Num.seqs=12 Similarity=0.725830  
29 -ATCGATTTTT-GA--NG--AAATT  
Rev.of\_WB235\_2:2623068-2623182 Satlength=115 Nr of Repeats=6  
RepeatLength=19 seed=AAAATCGATA Num.seqs=6 Similarity=0.601058  
47 -ATCGATTTTC-GA--TG--AAATT  
Rev.of\_WB235\_1:11532642-11533117 Satlength=476 Nr of Repeats=17  
RepeatLength=19 seed=TTTCACAAAA Num.seqs=12 Similarity=0.943647  
17 -ATTGATTTTT-G---TGA-AAATT  
Rev.of\_WB235\_1:11531919-11534041 Satlength=2123 Nr of Repeats=45  
RepeatLength=19 seed=AAAATCGATA Num.seqs=29 Similarity=0.730706  
29 -ATCGATTTTT-N---TGA-AAATT  
Rev.of\_WB235\_4:977829-978532 Satlength=704 Nr of Repeats=35  
RepeatLength=19 seed=CAATAATTTTC Num.seqs=27 Similarity=0.905233  
24 -ATTGATTTTT-T-G-GG--AAATT  
WB235\_1:11384374-11386353 Satlength=1980 Nr of Repeats=95 RepeatLength=20  
seed=ATTGATTTTT Num.seqs=91 Similarity=0.879707  
40 -ATTGATTTTT-T-GAGG--AAATT  
WB235\_1:2364706-2365240 Satlength=535 Nr of Repeats=20 RepeatLength=20  
seed=TTATTGATTT Num.seqs=12 Similarity=0.816162  
38 -ATTGATTTTT-C-TAGG--ACATT

\*\* \*\*\*\*\*

\*\*\*

Consensus:

tATtGATTTTTcTGnAAATT

>WB235\_Fam\_12\_45\_28 Nr. of seq. 28 Alignment length(with gaps) = 46

Alignment score = 0.807319

WB235\_2:11230254-11230477 Satlength=224 Nr of Repeats=5 RepeatLength=44

seed=AAGGATCAGA Num.seqs=3 Similarity=0.696296

0 AAGGATCAGAACATCA-GGAAG-AGCCTCGTGATCCTTTGGAGCTG

Rev.of\_WB235\_1:3553785-3554055 Satlength=271 Nr of Repeats=6

RepeatLength=45 seed=CTGAATCTTC Num.seqs=6 Similarity=0.990123

9 AAGATTCAGATCATAAAGGAGG-ATCCTTGTGATCCTTTGGAGCTG

WB235\_5:18314435-18314705 Satlength=271 Nr of Repeats=6 RepeatLength=45  
 seed=TTTGGAGCTG Num.seqs=6 Similarity=0.928889  
 35 AAGATTCAGTTCATAAGGGGGG-ACCCTTATGATCCTTTGGAGCTG  
 Rev.of\_WB235\_1:676497-676765 Satlength=269 Nr of Repeats=6  
 RepeatLength=45 seed=TCTGATCCTT Num.seqs=4 Similarity=0.792593  
 10 AAGGATCAGACCATCA-GGAGGTACCCTTGTGATCCTTCTTATCTG  
 Rev.of\_WB235\_3:7602309-7602577 Satlength=269 Nr of Repeats=6  
 RepeatLength=45 seed=TCTGATCCTT Num.seqs=4 Similarity=0.841975  
 10 AAGGATCAGACCATCA-GGAGGTACCCTTGTGATCCTTCTTATCTG  
 Rev.of\_WB235\_5:14348178-14348446 Satlength=269 Nr of Repeats=6  
 RepeatLength=45 seed=TCTGATCCTT Num.seqs=4 Similarity=0.812346  
 10 AAGGATCAGACCATCA-GGAGGTACCCTTGTGATCCTTCTTATCTG  
 WB235\_1:5977228-5977451 Satlength=224 Nr of Repeats=5 RepeatLength=45  
 seed=AAGGATCAGA Num.seqs=3 Similarity=0.841975  
 45 AAGGATCAGACCATCA-GAAGGTACCCTTACGATCCTTCTTATCTG  
 Rev.of\_WB235\_5:11108155-11108378 Satlength=224 Nr of Repeats=5  
 RepeatLength=45 seed=TCTGATCCTT Num.seqs=3 Similarity=0.822222  
 55 AAGGATCAGACCATCA-GGAGGTACCCTTACGATCCTTCTTATCTG  
 Rev.of\_WB235\_1:1664772-1664951 Satlength=180 Nr of Repeats=4  
 RepeatLength=45 seed=TCTGATCCTT Num.seqs=3 Similarity=0.743210  
 10 AAGGATCAGAACATCA-GAAGGTACCCATGTGATCCTTCGGAGCTG  
 WB235\_5:14348461-14348640 Satlength=180 Nr of Repeats=4 RepeatLength=45  
 seed=CTGAAGGATC Num.seqs=3 Similarity=0.841975  
 42 AAGGATCAGAACATCA-GAAGGTACCCATGTGATCCTTCGGAGCTG  
 Rev.of\_WB235\_1:3746094-3746497 Satlength=404 Nr of Repeats=9  
 RepeatLength=45 seed=TCTGATCCTT Num.seqs=7 Similarity=0.825044  
 10 AAGGATCAGANCATCA-GAAGGTACCCATGTGATCCTTCGGAGCTG  
 WB235\_1:3746917-3747230 Satlength=314 Nr of Repeats=7 RepeatLength=45  
 seed=CTGAAGGATC Num.seqs=5 Similarity=0.792593  
 42 AAGGATCAGANCATCA-GAAGGTACCCATGTGATCCTTCGGAGCTG  
 Rev.of\_WB235\_1:5975024-5975828 Satlength=805 Nr of Repeats=18  
 RepeatLength=45 seed=TCTGATCCTT Num.seqs=12 Similarity=0.835690  
 10 AAGGATCAGAACATCA-GAAGGTACCCTTGTGATCCTTCGGATCTG  
 Rev.of\_WB235\_2:11527871-11528452 Satlength=582 Nr of Repeats=13  
 RepeatLength=45 seed=TCTGATCCTT Num.seqs=9 Similarity=0.846914  
 10 AAGGATCAGANCATCA-GAAGGTACCCATGTGATCCTTCGGATCTG  
 WB235\_2:11530067-11530424 Satlength=358 Nr of Repeats=8 RepeatLength=45  
 seed=GAAGGATCAG Num.seqs=5 Similarity=0.828148  
 44 AAGGATCAGANCATCA-GAAGGTACCCATGTGATCCTTCGGATCTG  
 Rev.of\_WB235\_3:2496715-2496983 Satlength=269 Nr of Repeats=6  
 RepeatLength=45 seed=TCTGATCCTT Num.seqs=4 Similarity=0.802469  
 10 AAGGATCAGACCATCA-GGAGGTACCCATGTGATCCTTCGGATCTG  
 WB235\_3:7602873-7603364 Satlength=492 Nr of Repeats=11 RepeatLength=45  
 seed=GAAGGATCAG Num.seqs=7 Similarity=0.820811  
 44 AAGGATCAGANCATCA-GGAGGTACCCATGTGATCCTTCGGATCTG  
 Rev.of\_WB235\_3:10792337-10792694 Satlength=358 Nr of Repeats=8  
 RepeatLength=45 seed=TCTGATCCTT Num.seqs=5 Similarity=0.801481  
 10 AAGGATCAGANCATCA-GGAGGTACCCATGTGATCCTTCGGATCTG  
 WB235\_4:349715-350206 Satlength=492 Nr of Repeats=11 RepeatLength=45  
 seed=GAAGGATCAG Num.seqs=7 Similarity=0.826455  
 44 AAGGATCAGANCATCA-GGAGGTACCCATGTGATCCTTCGGATCTG  
 WB235\_2:6082023-6082291 Satlength=269 Nr of Repeats=6 RepeatLength=45  
 seed=CTGAAGGATC Num.seqs=4 Similarity=0.797531  
 42 AAGGATCAGAACATCA-GAAGGTACCCATACGATCCTTCGGAGCTG

WB235\_5:11108491-11108983 Satlength=493 Nr of Repeats=11 RepeatLength=45  
seed=CTGAAGGATC Num.seqs=8 Similarity=0.864550  
42 AAGGATCAGAACATCA-GAAGGTACCCATACGATCCTTCGGAGCTG  
Rev.of\_WB235\_4:8255934-8256202 Satlength=269 Nr of Repeats=6  
RepeatLength=45 seed=TCTGATCCTT Num.seqs=4 Similarity=0.851852  
55 AAGGATCAGACCATCA-GGAGGTACCCTTACGATCCTTCGGAGCTG  
WB235\_2:3937888-3938177 Satlength=290 Nr of Repeats=6 RepeatLength=45  
seed=AAGGATCAGA Num.seqs=5 Similarity=0.643210  
45 AAGGATCAGATCANCA-GGAGGTACCCTTCTGATCCTTCGGAGCTG  
Rev.of\_WB235\_2:12749754-12749935 Satlength=182 Nr of Repeats=4  
RepeatLength=45 seed=ATCTGATCCT Num.seqs=3 Similarity=0.950617  
56 AAGGATCAGATCACCA-GGAGGTACCCTTNTGATCCTTCGGAGCTG  
WB235\_4:3366659-3367988 Satlength=1330 Nr of Repeats=24 RepeatLength=45  
seed=TCTGATCCTT Num.seqs=17 Similarity=0.598811  
72 AAGGATCAGATCANCA-GGAGGTACCCTTCTGATCCTTCGNAGCTG  
Rev.of\_WB235\_4:10943462-10944138 Satlength=677 Nr of Repeats=14  
RepeatLength=45 seed=AGCTCCGAAG Num.seqs=11 Similarity=0.932121  
89 AAGGATCAGATCACCA-GGAGGTACCCTTCTGATCCTTCGGAGCTT  
WB235\_4:10945693-10946234 Satlength=542 Nr of Repeats=12 RepeatLength=45  
seed=CTTCGGAGCT Num.seqs=11 Similarity=0.945050  
124 AAGGATCAGATCACCA-GGAGGTACCCTTCTGATCCTTCGGAGCTT  
WB235\_2:13598710-13599880 Satlength=1171 Nr of Repeats=26 RepeatLength=45  
seed=ACCAGGAGGT Num.seqs=26 Similarity=0.929709  
57 AATGATCAGATCACCA-GGAGGTACCCTTCTTATCCTTCGGAGCTG

\*\*    \*\*\*\*    \*    \*    \*    \*    \*    \*    \*    \*    \*

Consensus:

AAGGATCAGAnCAtCAGgAGGTACCCTgTGATCCTTCGgAgCTG

>WB235\_Fam\_13\_43\_26 Nr. of seq. 26 Alignment length(with gaps) = 47  
Alignment score = 0.705990  
WB235\_1:1322604-1322925 Satlength=322 Nr of Repeats=5 RepeatLength=42  
seed=TTTGCCGGAA Num.seqs=3 Similarity=0.705426  
0 TTTGCCGGAAAT--TTTCATTTCCGGCAA-ATTGCCGATTTGNCG--  
WB235\_2:12951422-12951594 Satlength=173 Nr of Repeats=4 RepeatLength=43  
seed=CGGCAAATTA Num.seqs=4 Similarity=0.803618  
21 TTTGCCGGAAAT--TTTCATTTCCGGCAA-ATTACCAATTTGCCGA-  
Rev.of\_WB235\_1:1796469-1796919 Satlength=451 Nr of Repeats=9  
RepeatLength=43 seed=AAATCGGCAA Num.seqs=7 Similarity=0.793282  
3 TTTGCCGGAAAT--TTTCAATTCCGGCAA-ATTGCCGTTTGCCGA-  
WB235\_2:12905369-12905758 Satlength=390 Nr of Repeats=5 RepeatLength=43  
seed=GATTTGCCGG Num.seqs=3 Similarity=0.875969  
41 TTTGCCGGAAAT--TTTCAATCCCGCAA-ATTGCAGTTTGCCGA-  
WB235\_4:2140998-2141533 Satlength=536 Nr of Repeats=8 RepeatLength=43  
seed=TTGCCGGAAA Num.seqs=5 Similarity=0.868148  
44 TTTGCCGGAAAT--TTTCAATCCCGGCAT-TTTGCCGTTTGCCGA-  
Rev.of\_WB235\_1:3424298-3424548 Satlength=251 Nr of Repeats=6  
RepeatLength=43 seed=TTGAAAATTT Num.seqs=5 Similarity=0.810853  
18 TTTGCCGGAAAT--TTTCAATTCCGCCAA-TTTGCCGTTTGCCGA-  
Rev.of\_WB235\_2:3111494-3112267 Satlength=774 Nr of Repeats=16  
RepeatLength=43 seed=TTGCCGGAAT Num.seqs=13 Similarity=0.825084  
27 TTTACAGGAAAT--TTTCAATTCCGGCAA-GTTGCCGTTTGCCGA-

Rev.of\_WB235\_4:2964807-2965022 Satlength=216 Nr of Repeats=4  
 RepeatLength=43 seed=TTTGCCGGAA Num.seqs=3 Similarity=0.739899  
 28 TTTNCAGGAAAT--TTTCAATTCCGGCAA-ACTGCCGGTTTGCCAGA-  
 Rev.of\_WB235\_1:2263541-2264092 Satlength=552 Nr of Repeats=13  
 RepeatLength=43 seed=ATTTCCGGCA Num.seqs=12 Similarity=0.752353  
 12 TTTGCCGGAAAT--TTTTATTTTCGGCAA-NTTGCCGGTTTGCCGA-  
 Rev.of\_WB235\_1:11474410-11474625 Satlength=216 Nr of Repeats=5  
 RepeatLength=43 seed=CGGCAAATCG Num.seqs=5 Similarity=0.801550  
 50 TTTGCCGGAAAT--TTTCATTTTCGGCAA-NTTGCCGGTTTGCCGA-  
 Rev.of\_WB235\_2:12402768-12404058 Satlength=1291 Nr of Repeats=30  
 RepeatLength=43 seed=TTTCCGGCAA Num.seqs=30 Similarity=0.867914  
 54 TTTGCCGGAAAT--TTTCATTTTCGGCAA-ATTGCCGGTTTGCCGA-  
 WB235\_3:12017198-12017750 Satlength=553 Nr of Repeats=10 RepeatLength=43  
 seed=AATTGCCGGT Num.seqs=7 Similarity=0.748854  
 69 TTTGCCGGAAAA--TTTCATTTTCGGCAA-ATTGCCGGTTTGCCGA-  
 WB235\_3:13094103-13095343 Satlength=1241 Nr of Repeats=25 RepeatLength=43  
 seed=CGGAAATTTT Num.seqs=17 Similarity=0.776106  
 48 TTTGCCGGAAAT--TTTNATTTTCGGCAA-TTGCCNGTTTGCCGA-  
 WB235\_2:12719695-12719880 Satlength=186 Nr of Repeats=5 RepeatLength=43  
 seed=TATTTTCATT Num.seqs=3 Similarity=0.979328  
 52 TTTGCCGGGTAT--TTTCATTTTCGGCAA-ATTGCCGGTTTGCCGA-  
 WB235\_1:687047-687860 Satlength=814 Nr of Repeats=14 RepeatLength=44  
 seed=TTTGCCGGTT Num.seqs=9 Similarity=0.927609  
 28 TTTGCCCGAAAT--TTTCAATTTTCGGCAA-TTTGCCGGTTTGCCGA-  
 Rev.of\_WB235\_1:1797802-1798215 Satlength=414 Nr of Repeats=9  
 RepeatLength=43 seed=GCCGGAATTG Num.seqs=7 Similarity=0.864157  
 25 TTTGCCAGAAAT--TTTCAATTCCGGCTA-TGTGCCGGTTTGCCGA-  
 WB235\_1:2817881-2818157 Satlength=277 Nr of Repeats=5 RepeatLength=43  
 seed=TTGCCGATTT Num.seqs=3 Similarity=0.834625  
 29 TTTGCCGGAAAT--TTACAATTCC-ACTATTTTGCCGGTTTGCCGA-  
 Rev.of\_WB235\_1:1209321-1210686 Satlength=1366 Nr of Repeats=32  
 RepeatLength=43 seed=CCAGAAATTA Num.seqs=22 Similarity=0.892882  
 24 TTTGCCGAAAAT--TCTAATTTCTGGCAA-TTTGCCGGTTTGCTGA-  
 Rev.of\_WB235\_1:2858185-2858357 Satlength=173 Nr of Repeats=4  
 RepeatLength=43 seed=AAATCGGCAA Num.seqs=4 Similarity=0.906977  
 46 TTTGCCGGGAAT--TTTCATTTTTTGCAA-TTTGCCGGATTGCCGA-  
 Rev.of\_WB235\_3:12581020-12581289 Satlength=270 Nr of Repeats=5  
 RepeatLength=43 seed=GGCAAATCGG Num.seqs=3 Similarity=0.689394  
 49 TTTGCCGGAAAT--TTTNATATTTNACAA-ATTGCCGGTTTGCCGA-  
 WB235\_1:2653859-2654031 Satlength=173 Nr of Repeats=4 RepeatLength=43  
 seed=TTGCCGATTT Num.seqs=4 Similarity=0.798450  
 36 TTTGCCGGAAAT-GTTT-ATTTCCGACAA-TTGGCAGATTTGCCGA-  
 WB235\_1:14554105-14554484 Satlength=380 Nr of Repeats=9 RepeatLength=43  
 seed=TTTGCCGGTT Num.seqs=8 Similarity=0.931340  
 27 TTCGACGGAAAT--TTTTATTTTCGGCAC-TTGCCGGTTTGCCGG-  
 Rev.of\_WB235\_5:3679665-3679834 Satlength=170 Nr of Repeats=4  
 RepeatLength=42 seed=TTTCCAGCAA Num.seqs=3 Similarity=0.767196  
 11 TTTGCTGGAAA--TCTCAATTCCGGCAA-TTCGCTGATTTGCCGA-  
 Rev.of\_WB235\_1:2233376-2233627 Satlength=252 Nr of Repeats=6  
 RepeatLength=43 seed=CAAATCGGCA Num.seqs=5 Similarity=0.795349  
 47 TTTGCTGGAAAT--TTTTAATTTTCGAAA-TTGCCGAGTTGCCGA-  
 WB235\_5:17885285-17887191 Satlength=1907 Nr of Repeats=37 RepeatLength=44  
 seed=TTGCCGAAA Num.seqs=31 Similarity=0.808472  
 1 TTTGCCGGAAAT--ATTCAATTTTGCAA-ATTGNCCGGTTTGCTGAA

WB235\_1:11113480-11113648 Satlength=169 Nr of Repeats=4 RepeatLength=42  
seed=TGCCGGAAAT Num.seqs=4 Similarity=0.788360  
2 GCTGCCGGAAAT---TTCAAACCCGGCAA-TTTGCCCATTTGCCGA-

\* \* \* \* \*

Consensus:

TTTGCCGGAAATTTTcAaTTcCGGCAAtTTGCCGgTTTGCCGA

>WB235\_Fam\_14\_11\_23 Nr. of seq. 23 Alignment length(with gaps) = 12  
Alignment score = 0.800725

WB235\_1:11694858-11694997 Satlength=140 Nr of Repeats=13 RepeatLength=11  
seed=TTTTGCACAT Num.seqs=9 Similarity=0.838384

0 TTTTGCACAT-T

WB235\_1:12093567-12094297 Satlength=731 Nr of Repeats=59 RepeatLength=11  
seed=CACATTTTTT Num.seqs=45 Similarity=0.854790

5 TTTTGCACAT-T

WB235\_1:12129305-12129768 Satlength=464 Nr of Repeats=41 RepeatLength=11  
seed=TTGCACATTT Num.seqs=32 Similarity=0.962854

2 TTTTGCACAT-T

WB235\_2:4442528-4442746 Satlength=219 Nr of Repeats=20 RepeatLength=11  
seed=TGCACATTTT Num.seqs=18 Similarity=0.986532

3 TTTTGCACAT-T

WB235\_3:1245524-1246875 Satlength=1352 Nr of Repeats=116 RepeatLength=11  
seed=TTTTTGCACA Num.seqs=73 Similarity=0.910060

10 TTTTGCACAT-T

Rev.of\_WB235\_3:1671460-1671581 Satlength=122 Nr of Repeats=11  
RepeatLength=11 seed=GCAAAAAATG Num.seqs=11 Similarity=0.960331

6 TTTTGCACAT-T

WB235\_3:1809979-1810419 Satlength=441 Nr of Repeats=36 RepeatLength=11  
seed=ATTTTTTGCA Num.seqs=32 Similarity=0.920088

8 TTTTGCACAT-T

Rev.of\_WB235\_3:1985833-1986090 Satlength=258 Nr of Repeats=24  
RepeatLength=11 seed=TGTGCAAAAA Num.seqs=17 Similarity=0.959002

9 TTTTGCACAT-T

WB235\_3:12172469-12173356 Satlength=888 Nr of Repeats=63 RepeatLength=11  
seed=TTTTTGCACA Num.seqs=46 Similarity=1.000000

10 TTTTGCACAT-T

Rev.of\_WB235\_3:13116308-13116374 Satlength=67 Nr of Repeats=5  
RepeatLength=11 seed=AAAAATGTGC Num.seqs=4 Similarity=1.000000

3 TTTTGCACAT-T

WB235\_4:15648768-15648845 Satlength=78 Nr of Repeats=6 RepeatLength=11  
seed=TGCACATTTT Num.seqs=5 Similarity=0.903030

3 TTTTGCACAT-T

WB235\_5:2886582-2886789 Satlength=208 Nr of Repeats=19 RepeatLength=11  
seed=GCACATTTTT Num.seqs=17 Similarity=0.908200

4 TTTTGCACAT-T

Rev.of\_WB235\_5:3629745-3629789 Satlength=45 Nr of Repeats=4  
RepeatLength=11 seed=CAAAAAATGT Num.seqs=4 Similarity=0.878788

5 TTTTGCACAT-T

WB235\_5:11057749-11057963 Satlength=215 Nr of Repeats=10 RepeatLength=11  
seed=CACATTTTTT Num.seqs=9 Similarity=0.946128

5 TTTTGCACAT-T

Rev.of\_WB235\_6:8602386-8602451 Satlength=66 Nr of Repeats=5  
RepeatLength=11 seed=GCAAAAATG Num.seqs=4 Similarity=0.878788  
6 TTTTGCACAT-T  
WB235\_3:11862696-11862861 Satlength=166 Nr of Repeats=15 RepeatLength=11  
seed=ACATTTTTTG Num.seqs=13 Similarity=0.919192  
6 TTTTGNACAT-T  
Rev.of\_WB235\_1:11840154-11840231 Satlength=78 Nr of Repeats=7  
RepeatLength=11 seed=CAAAAATGT Num.seqs=7 Similarity=0.942280  
5 TTTTGGACAT-T  
WB235\_4:13547778-13547822 Satlength=45 Nr of Repeats=4 RepeatLength=11  
seed=CACATTTTTT Num.seqs=4 Similarity=0.919192  
5 TTTTCCACAT-T  
WB235\_4:13575701-13576041 Satlength=341 Nr of Repeats=30 RepeatLength=11  
seed=GCACATTTTTT Num.seqs=22 Similarity=0.772787  
4 TTTAGCACAT-T  
Rev.of\_WB235\_6:3261930-3262051 Satlength=122 Nr of Repeats=11  
RepeatLength=11 seed=AAAATGTGCT Num.seqs=7 Similarity=0.826720  
13 TTTAGCACAT-T  
Rev.of\_WB235\_4:15034367-15034488 Satlength=122 Nr of Repeats=9  
RepeatLength=11 seed=TGTGCAAAAA Num.seqs=7 Similarity=0.838384  
9 TTTTGCACAA-T  
Rev.of\_WB235\_5:3092621-3092687 Satlength=67 Nr of Repeats=5  
RepeatLength=11 seed=TTTGGCAAGA Num.seqs=4 Similarity=0.818182  
10 TCTTGCCCAA-T  
WB235\_2:144001-144084 Satlength=84 Nr of Repeats=6 RepeatLength=12  
seed=ATTCTTGCA Num.seqs=5 Similarity=0.844444  
21 TCTTGCAAAAT

\* \* \* \*

Consensus:

TTTTGCACATT

>WB235\_Fam\_15\_31\_22 Nr. of seq. 22 Alignment length(with gaps) = 33  
Alignment score = 0.785911  
WB235\_3:78610-79849 Satlength=1240 Nr of Repeats=39 RepeatLength=31  
seed=TAAATAATTA Num.seqs=37 Similarity=0.866835  
0 TAAATAATTAGCAGA-CCAAAGTTGGG-TCTGC  
WB235\_3:85304-85614 Satlength=311 Nr of Repeats=9 RepeatLength=31  
seed=TGCTAAATAA Num.seqs=8 Similarity=0.907834  
28 TAAATAATTAGCAGA-CCAAAGTTGGG-TATGC  
Rev.of\_WB235\_3:498249-499054 Satlength=806 Nr of Repeats=26  
RepeatLength=31 seed=GGTCTGCTAA Num.seqs=19 Similarity=0.861661  
48 TAAATAATTAGCAGA-CCAAAGTTGGG-TATGC  
WB235\_3:587989-588144 Satlength=156 Nr of Repeats=5 RepeatLength=31  
seed=TGGGTATGCT Num.seqs=5 Similarity=1.000000  
53 TAAATAATTAGCAGA-CCAAAGTTGGG-TATGC  
Rev.of\_WB235\_3:584894-585235 Satlength=342 Nr of Repeats=11  
RepeatLength=31 seed=GGTCTGCTAA Num.seqs=11 Similarity=0.968719  
17 TAAATAATTAGCAGA-CCGAAGTTGGG-TATGC  
Rev.of\_WB235\_3:334126-334653 Satlength=528 Nr of Repeats=17  
RepeatLength=31 seed=TGGTCTGCTA Num.seqs=15 Similarity=0.868920  
18 TAAATATTTAGCAGA-CCAAAGTTGGG-TATGC

WB235\_3:346580-346716 Satlength=137 Nr of Repeats=5 RepeatLength=31  
seed=AATATTTAGC Num.seqs=3 Similarity=0.885305  
33 TAAATATTTAGCAGA-CCAAAGTTGGG-TATGC  
WB235\_3:470472-471505 Satlength=1034 Nr of Repeats=16 RepeatLength=31  
seed=TTAGCAGAC Num.seqs=10 Similarity=0.931183  
37 TAAATATTTAGCAGA-CCAAAGTTGGG-TATGC  
WB235\_3:492131-493485 Satlength=1355 Nr of Repeats=34 RepeatLength=31  
seed=TTAGCAGACC Num.seqs=25 Similarity=0.924301  
38 TAAATATTTAGCAGA-CCAAAGATGGG-TATGC  
WB235\_3:855590-855838 Satlength=249 Nr of Repeats=7 RepeatLength=31  
seed=TAAATATTTA Num.seqs=6 Similarity=0.862366  
31 TAAATATTTAGCAGA-CCAAAGTTAGG-TATGC  
Rev.of\_WB235\_3:187630-188214 Satlength=585 Nr of Repeats=4  
RepeatLength=31 seed=TTAGCAGACC Num.seqs=3 Similarity=0.942652  
3 TAAATAATTAGCAGA-CCATAGTTGGG-TCTGC  
WB235\_3:410715-410901 Satlength=187 Nr of Repeats=6 RepeatLength=31  
seed=TTGGGTCTGC Num.seqs=6 Similarity=0.868100  
21 TAAATAATTAGCAGA-CCATAATTGGG-TCTGC  
Rev.of\_WB235\_3:423133-423737 Satlength=605 Nr of Repeats=6  
RepeatLength=31 seed=TATTTAGCAG Num.seqs=5 Similarity=0.901075  
37 TAAATAATTAGCAGA-CCATAATTGGG-TCTGC  
Rev.of\_WB235\_3:189539-190145 Satlength=607 Nr of Repeats=5  
RepeatLength=31 seed=TTAGCAGACC Num.seqs=3 Similarity=0.971326  
3 TAATTATTTAGCAGA-CCATACTTGGG-TCTGC  
Rev.of\_WB235\_3:191259-191627 Satlength=369 Nr of Repeats=7  
RepeatLength=31 seed=GGTCTGCTAA Num.seqs=6 Similarity=0.868100  
17 TAAATATTTAGCAGA-CCATACTTGGG-TCTGC  
Rev.of\_WB235\_3:193180-193459 Satlength=280 Nr of Repeats=9  
RepeatLength=31 seed=ACCCAAGTAT Num.seqs=9 Similarity=0.906810  
27 TAAACATTTAGCAGA-CCATACTTGGG-TCTGC  
WB235\_3:9853874-9853997 Satlength=124 Nr of Repeats=4 RepeatLength=31  
seed=TCTGCTAAAT Num.seqs=3 Similarity=0.971326  
26 TAAATAATTAGCAGA-CCATACTTGAT-TCTGC  
WB235\_3:337086-337644 Satlength=559 Nr of Repeats=17 RepeatLength=31  
seed=TATGCTAAAT Num.seqs=16 Similarity=0.883154  
26 TAAATATTTAGCAGA-CCAAAAGTAGG-TATGC  
WB235\_3:340719-342118 Satlength=1400 Nr of Repeats=23 RepeatLength=31  
seed=TTAGCAGACC Num.seqs=22 Similarity=0.867430  
38 TAAATATTTAGCAGA-CCAAAANTAGG-TATGC  
Rev.of\_WB235\_3:345158-345375 Satlength=218 Nr of Repeats=7  
RepeatLength=31 seed=CTGCTAAATA Num.seqs=7 Similarity=0.938556  
45 TAAATATTTAGCAGA-CCCAAAGTTGG-TATGC  
WB235\_3:9958568-9958766 Satlength=199 Nr of Repeats=4 RepeatLength=31  
seed=TATGCTAAAT Num.seqs=3 Similarity=0.812500  
26 TAAATATTTAGCAGA-CCCAANGT-GGNTATGC  
WB235\_3:633852-634044 Satlength=193 Nr of Repeats=6 RepeatLength=31  
seed=TTAGCAGACC Num.seqs=4 Similarity=0.781250  
7 TAAATAATTAGCAGACCCATAGGTAGG-TATGC

\*\*\* \* \*\*\*\*\* \*\* \* \* \* \*\*\*

Consensus:

TAAATAtTTAGCAGACCAaAgtTgGGTaTGC



>WB235\_Fam\_16\_26\_20 Nr. of seq. 20 Alignment length(with gaps) = 26  
 Alignment score = 0.760324  
 WB235\_1:3171655-3172409 Satlength=755 Nr of Repeats=29 RepeatLength=26  
 seed=CAGAGTCACT Num.seqs=29 Similarity=0.926235  
 0 CAGAGTCACTATTTTTGGGGAACGGC  
 WB235\_4:15409425-15409737 Satlength=313 Nr of Repeats=12 RepeatLength=26  
 seed=CAGAGTCACT Num.seqs=12 Similarity=0.943279  
 0 CAGAGTCACTATTTTTGGTGAACGGC  
 WB235\_5:5283302-5285834 Satlength=2533 Nr of Repeats=98 RepeatLength=26  
 seed=CAGAGTCACT Num.seqs=94 Similarity=0.876599  
 0 CAGAGTCACTATTTTTGGTGAACGGC  
 WB235\_6:15807460-15811152 Satlength=3693 Nr of Repeats=142  
 RepeatLength=26 seed=GTGAACGGCC Num.seqs=142 Similarity=0.927510  
 17 CAGAGTCACTATTTTTGGTGAACGGC  
 WB235\_6:1636150-1638568 Satlength=2419 Nr of Repeats=93 RepeatLength=26  
 seed=GGTGAACGGT Num.seqs=93 Similarity=0.946896  
 16 CAGAGTCACTATTTTTGGTGAACGGT  
 Rev.of\_WB235\_6:5542238-5542420 Satlength=183 Nr of Repeats=7  
 RepeatLength=26 seed=TAGTGACTCT Num.seqs=7 Similarity=0.836567  
 11 CAGAGTCACTAATTTTTGGTGAACGGC  
 WB235\_3:931109-931213 Satlength=105 Nr of Repeats=4 RepeatLength=26  
 seed=CGGCCAGAGT Num.seqs=4 Similarity=0.863248  
 22 CAGAGTCACTACTTATGGTGAACGGC  
 WB235\_5:10446631-10446995 Satlength=365 Nr of Repeats=14 RepeatLength=26  
 seed=CCAGAGTCAC Num.seqs=14 Similarity=0.974641  
 25 CAGAGTCACTATAATTGGTGAACGGC  
 Rev.of\_WB235\_1:13277345-13277527 Satlength=183 Nr of Repeats=7  
 RepeatLength=26 seed=CTCTGGCAGT Num.seqs=7 Similarity=0.941392  
 5 CAGAGCCACTTATTTTTAGTGAAGTGC  
 WB235\_4:10985445-10985549 Satlength=105 Nr of Repeats=4 RepeatLength=26  
 seed=CCAGAGTCAC Num.seqs=4 Similarity=0.863248  
 25 CAGAGTCACTATTTTTAGTGAAGTGC  
 WB235\_6:2379254-2380684 Satlength=1431 Nr of Repeats=55 RepeatLength=26  
 seed=TTTTAGTGAA Num.seqs=55 Similarity=0.934801  
 38 CAGAGTCACTAATTTTTAGTGAAGTGC  
 WB235\_1:3664200-3666098 Satlength=1899 Nr of Repeats=73 RepeatLength=26  
 seed=ATGGTTAGAG Num.seqs=73 Similarity=0.974476  
 21 TAGAGTCATATTTTTAGGTGAATGGT  
 Rev.of\_WB235\_2:10336035-10336399 Satlength=365 Nr of Repeats=14  
 RepeatLength=26 seed=TATGACTCTA Num.seqs=14 Similarity=0.950409  
 36 TAGAGTCATATTTTTAGGTGAATGGT  
 Rev.of\_WB235\_6:1642568-1643478 Satlength=911 Nr of Repeats=35  
 RepeatLength=26 seed=GA CTCTAACC Num.seqs=35 Similarity=0.961474  
 33 TAGAGTCATATTTTTAGGTGAATGGT  
 WB235\_1:13404330-13408464 Satlength=4135 Nr of Repeats=159  
 RepeatLength=26 seed=TTTTAGGTGA Num.seqs=159 Similarity=0.972965  
 37 TAGAGTCATAATTTTTAGGTGAATGGT  
 WB235\_3:5353177-5358366 Satlength=5190 Nr of Repeats=198 RepeatLength=26  
 seed=GTTAGAGTCA Num.seqs=196 Similarity=0.933400  
 24 TAGAGTCATTATTTTTAGGTGAATGGT  
 Rev.of\_WB235\_3:5358375-5358505 Satlength=131 Nr of Repeats=5  
 RepeatLength=26 seed=ACCATTCACC Num.seqs=5 Similarity=0.917949  
 26 TAGAGTCATTATTTTTAGGTGAATGGT

WB235\_4:14781306-14781436 Satlength=131 Nr of Repeats=5 RepeatLength=26  
seed=TTGGTTAGAGT Num.seqs=5 Similarity=0.958974  
48 TAGAGTCATTATTTTAGGTGAATGGT  
Rev.of\_WB235\_5:15170122-15170278 Satlength=157 Nr of Repeats=6  
RepeatLength=26 seed=TTACACCTAAA Num.seqs=6 Similarity=0.846154  
48 TAGAGTCATTATTTTAGGTGAATGGT  
Rev.of\_WB235\_6:11785744-11787512 Satlength=1769 Nr of Repeats=68  
RepeatLength=26 seed=ACCATTACACC Num.seqs=68 Similarity=0.956012  
26 TAGAGTCATTATTTTAGGTGAATGGT

\*\*\*\* \* \* \* \*

Consensus:

cAGAGTCActatTTTtGGTGAAcGGc

>WB235\_Fam\_17\_37\_19 Nr. of seq. 19 Alignment length(with gaps) = 43  
Alignment score = 0.743370  
WB235\_5:16273671-16273852 Satlength=182 Nr of Repeats=5 RepeatLength=36  
seed=GGGAATTCAA Num.seqs=4 Similarity=0.962963  
25 TTTTAATTTTTT-GAAAAC-ATTTTGGC-GGGAA-TTC--AAA  
WB235\_3:3023864-3024701 Satlength=838 Nr of Repeats=18 RepeatLength=37  
seed=ATTTTGGCGG Num.seqs=16 Similarity=0.920120  
54 TTTTAATTTTTTC-GAAAAC-ATTTTGGC-GGGAA-TTC--AAA  
WB235\_5:17308169-17308466 Satlength=298 Nr of Repeats=8 RepeatLength=37  
seed=AAAACATTTT Num.seqs=5 Similarity=0.894737  
86 TTTTAATTTTTT-GAAAAC-ATTTTGGC-GGGAA-TTC--AAA  
WB235\_4:3098171-3098319 Satlength=149 Nr of Repeats=4 RepeatLength=37  
seed=TTGGCGGGAAT Num.seqs=4 Similarity=0.867868  
58 TTTTAATTTTCC-GAAAAC-ATTTTGGC-GGGAA-TTC--AAA  
WB235\_2:12649041-12649452 Satlength=412 Nr of Repeats=11 RepeatLength=37  
seed=ATTTTGGCGG Num.seqs=7 Similarity=0.951952  
54 TTTTAATTTTTT-GAAAAT-ATTTTGGC-GGGAA-TTC--AAA  
WB235\_3:10943916-10944702 Satlength=787 Nr of Repeats=15 RepeatLength=37  
seed=TTGGCGGGAA Num.seqs=10 Similarity=0.935135  
57 TTTTAATTTTTT-GAAAAT-ATTTTGGC-GGGAA-TTC--AAA  
WB235\_4:280698-281177 Satlength=480 Nr of Repeats=13 RepeatLength=37  
seed=TTGGCGGGAA Num.seqs=9 Similarity=0.933934  
57 TTTTAATTTTTT-GAAAAT-ATTTTGGC-GGGAA-TTC--AAA  
Rev.of\_WB235\_4:17147932-17148762 Satlength=831 Nr of Repeats=9  
RepeatLength=37 seed=ATTCCCGCCA Num.seqs=6 Similarity=0.896697  
68 TTTTAATTTTTT-GAAAAT-ATTTTGGC-GGGAA-TTC--AAA  
WB235\_6:14119472-14121076 Satlength=1605 Nr of Repeats=43 RepeatLength=37  
seed=TTTAATTTTTT Num.seqs=26 Similarity=0.924934  
74 TTTTAATTTTTT-GAAAAT-ATTTTGGC-GGGAA-TTC--AAA  
Rev.of\_WB235\_4:1681168-1681390 Satlength=223 Nr of Repeats=6  
RepeatLength=37 seed=CGCCAAAATG Num.seqs=6 Similarity=0.894294  
63 TTTTAATTTTTT-GAAAAC-ATTTTGGC-GGGAA-TTC--AAA  
WB235\_4:16471145-16471947 Satlength=803 Nr of Repeats=4 RepeatLength=37  
seed=ATTCAAATTT Num.seqs=3 Similarity=0.951952  
66 TTTTAATTTTTT-GAAAAT-ACTTTGGC-GGGAA-TTC--AAA  
Rev.of\_WB235\_5:20153934-20154193 Satlength=260 Nr of Repeats=7  
RepeatLength=37 seed=AATTTGAATT Num.seqs=7 Similarity=0.941656  
75 TTTTAATTTTTC-AAAAT-ATTTTGGC-GGGAA-TTC--AAA

WB235\_4:15842446-15843519 Satlength=1074 Nr of Repeats=16 RepeatLength=37  
seed=CGGGAATTCA Num.seqs=13 Similarity=0.831370  
61 TTTTAATTTTTT-G-AAATCATTTTGGC-GGGAA-TTC--AAA  
WB235\_5:15941558-15942466 Satlength=909 Nr of Repeats=7 RepeatLength=37  
seed=GCGGGAATTC Num.seqs=5 Similarity=0.877477  
97 TTTTAATTATTT-G-AAATCATTTTGGC-GGGAA-TTC--AAA  
WB235\_1:1317490-1319274 Satlength=1785 Nr of Repeats=47 RepeatLength=38  
seed=GGGAATTCAA Num.seqs=45 Similarity=0.939890  
25 TTTTAATTTTTTTTGAAAAC-ATTTTGGC-GGGAA-TTC--AAA  
WB235\_3:12698391-12698580 Satlength=190 Nr of Repeats=5 RepeatLength=38  
seed=TTTGTGCGGG Num.seqs=4 Similarity=0.844017  
56 ATTTAATTTTTTTTGAAAAT-ATTTTGGC-GGGAA-TTC--AAA  
WB235\_1:280525-281393 Satlength=869 Nr of Repeats=23 RepeatLength=38  
seed=AAATTTTAAT Num.seqs=17 Similarity=0.995872  
34 TTTTAATTTTTT-GAAAAT-ATTTTGGC-GGGAATTTA--AAA  
WB235\_3:2113231-2114730 Satlength=1500 Nr of Repeats=39 RepeatLength=39  
seed=TTTTTGGCGG Num.seqs=29 Similarity=0.914530  
55 TTCAA-TTTTTC-AAATAT-TTTTTGGCGGGAAA-TTCAAAAA  
Rev.of\_WB235\_3:2117069-2117228 Satlength=160 Nr of Repeats=4  
RepeatLength=40 seed=TCCCGCCAAA Num.seqs=3 Similarity=0.866667  
67 TTTAAATTTTTT-GAATAT-TTTTTGGCGGGAAA-TTCAAAAA

\*\* \*\* \* \* \* \* \* \*

Consensus:

GGGAATTCAAATTTTAATTTTTtGAAAAtATTTTGGC

>WB235\_Fam\_18\_19\_17 Nr. of seq. 17 Alignment length(with gaps) = 19  
Alignment score = 0.859649  
WB235\_1:12955954-12956201 Satlength=248 Nr of Repeats=13 RepeatLength=19  
seed=CAAGGCACTA Num.seqs=13 Similarity=0.816464  
0 CAAGGCACTAGAAATGCGC  
Rev.of\_WB235\_5:18575312-18575616 Satlength=305 Nr of Repeats=15  
RepeatLength=19 seed=TAGTGCCTTG Num.seqs=12 Similarity=0.808612  
10 CAAGGCACTAGAAATGCGC  
Rev.of\_WB235\_5:18684513-18684741 Satlength=229 Nr of Repeats=8  
RepeatLength=19 seed=TTCTAGTGCC Num.seqs=5 Similarity=0.817544  
13 CAAGGCACTAGAAATGCGC  
WB235\_5:19373212-19373421 Satlength=210 Nr of Repeats=9 RepeatLength=19  
seed=TTGCGCCAAG Num.seqs=7 Similarity=0.744444  
13 CAAGGCACTAGAAATGCGC  
Rev.of\_WB235\_3:3233988-3234755 Satlength=768 Nr of Repeats=13  
RepeatLength=19 seed=CTTGGCGCAA Num.seqs=8 Similarity=0.764411  
4 CAAGGCACGAGAATTGCGC  
WB235\_5:19379891-19380043 Satlength=153 Nr of Repeats=5 RepeatLength=19  
seed=AGAATTGCGC Num.seqs=3 Similarity=0.859649  
9 CAAGGCACGAGAATTGCGC  
Rev.of\_WB235\_5:19148365-19148726 Satlength=362 Nr of Repeats=16  
RepeatLength=19 seed=TGGCGCATTT Num.seqs=14 Similarity=0.787160  
21 CAAGGCACGAGAAATGCGC  
WB235\_5:18388249-18388686 Satlength=438 Nr of Repeats=22 RepeatLength=19  
seed=CAAGGCACTA Num.seqs=21 Similarity=0.750042  
0 CAAGGCACTANAATTGCGT

Rev.of\_WB235\_5:18389794-18390302 Satlength=509 Nr of Repeats=18  
 RepeatLength=19 seed=TGACGCAATT Num.seqs=14 Similarity=0.787931  
 2 CAAGGCACTAGAAATTGCGT  
 Rev.of\_WB235\_5:18676328-18676917 Satlength=590 Nr of Repeats=23  
 RepeatLength=19 seed=TGACGCAATT Num.seqs=15 Similarity=0.830476  
 2 CAAGGCACTAGAAATTGCGT  
 WB235\_5:18677260-18677830 Satlength=571 Nr of Repeats=26 RepeatLength=19  
 seed=ACTAGAAATTG Num.seqs=23 Similarity=0.820539  
 6 CAAGGCACTAGAAATTGCGT  
 Rev.of\_WB235\_5:19380090-19380527 Satlength=438 Nr of Repeats=16  
 RepeatLength=19 seed=GCCTTGACGC Num.seqs=11 Similarity=0.888995  
 6 CAAGGCACTAGAAATTGCGT  
 Rev.of\_WB235\_5:19821185-19822021 Satlength=837 Nr of Repeats=37  
 RepeatLength=19 seed=TAGTGCCTTG Num.seqs=30 Similarity=0.844807  
 10 CAAGGCACTAGAAATTGCGT  
 Rev.of\_WB235\_5:18573477-18573762 Satlength=286 Nr of Repeats=11  
 RepeatLength=19 seed=TTGACGCAAT Num.seqs=9 Similarity=0.666667  
 3 CAANGCACTAGAAATTGCGT  
 Rev.of\_WB235\_5:18619123-18619731 Satlength=609 Nr of Repeats=29  
 RepeatLength=19 seed=GTGCCTTGAC Num.seqs=26 Similarity=0.876923  
 8 CAAGGCACTAGAAANTGCGT  
 WB235\_2:3036430-3037140 Satlength=711 Nr of Repeats=18 RepeatLength=19  
 seed=GCCAAGGCAC Num.seqs=11 Similarity=0.680606  
 17 CAAGGCACTNGAAANGCGC  
 Rev.of\_WB235\_5:19022623-19023690 Satlength=1068 Nr of Repeats=10  
 RepeatLength=19 seed=TGGCGCATTT Num.seqs=6 Similarity=0.714620  
 2 CAACTCACCAAATGCGC

\*\*\* \*\*

Consensus:

CAAGGCACTAGAAATGCGC

>WB235\_Fam\_19\_14\_17 Nr. of seq. 17 Alignment length(with gaps) = 14  
 Alignment score = 0.892682  
 WB235\_2:11306986-11307037 Satlength=52 Nr of Repeats=4 RepeatLength=12  
 seed=ACTATAACTA Num.seqs=3 Similarity=0.851852  
 0 ACTATA-ACTACA-  
 WB235\_1:11155001-11155099 Satlength=99 Nr of Repeats=7 RepeatLength=14  
 seed=AACTACTAAC Num.seqs=7 Similarity=0.803175  
 6 ACTACTAACTACTA  
 Rev.of\_WB235\_1:13019817-13020208 Satlength=392 Nr of Repeats=8  
 RepeatLength=14 seed=AGTTTGTAGT Num.seqs=5 Similarity=0.885714  
 10 ACTACAAACTACAA  
 Rev.of\_WB235\_1:13499215-13500226 Satlength=1012 Nr of Repeats=11  
 RepeatLength=14 seed=TAGTTTGTAG Num.seqs=7 Similarity=0.845805  
 18 ACTACAAACTACAA  
 WB235\_1:13500544-13500919 Satlength=376 Nr of Repeats=11 RepeatLength=14  
 seed=TACAAACTAC Num.seqs=7 Similarity=0.918367  
 23 ACTACAAACTACAA  
 Rev.of\_WB235\_1:14324192-14324420 Satlength=229 Nr of Repeats=4  
 RepeatLength=14 seed=TGTAGTTTGT Num.seqs=3 Similarity=0.936508  
 20 ACTACAAACTACAA

WB235\_2:2629919-2630440 Satlength=522 Nr of Repeats=10 RepeatLength=14  
seed=CTACAAACTA Num.seqs=6 Similarity=0.796825  
22 ACTACAAACTACAA  
WB235\_2:12761888-12762610 Satlength=723 Nr of Repeats=9 RepeatLength=14  
seed=AACTACAAAC Num.seqs=6 Similarity=0.841270  
20 ACTACAAACTACAA  
Rev.of\_WB235\_2:13303475-13303853 Satlength=379 Nr of Repeats=13  
RepeatLength=14 seed=TAGTTTGTAG Num.seqs=8 Similarity=0.829932  
18 ACTACAAACTACAA  
WB235\_2:13962702-13964354 Satlength=1653 Nr of Repeats=47 RepeatLength=14  
seed=TACAAACTAC Num.seqs=31 Similarity=0.870968  
23 ACTACAAACTACAA  
Rev.of\_WB235\_2:14006143-14006320 Satlength=178 Nr of Repeats=5  
RepeatLength=14 seed=GTAGTTTGTGTA Num.seqs=3 Similarity=0.809524  
19 ACTACAAACTACAA  
Rev.of\_WB235\_4:15294619-15295382 Satlength=764 Nr of Repeats=4  
RepeatLength=14 seed=TTGTAGTTTG Num.seqs=3 Similarity=0.936508  
21 ACTACAAACTACAA  
WB235\_5:18354225-18354524 Satlength=300 Nr of Repeats=14 RepeatLength=14  
seed=ACAAACTACA Num.seqs=10 Similarity=0.942857  
10 ACTACAAACTACAA  
Rev.of\_WB235\_5:19550939-19551875 Satlength=937 Nr of Repeats=7  
RepeatLength=14 seed=TTTGTAGTTT Num.seqs=5 Similarity=0.804444  
22 ACTACAAACTACAA  
WB235\_5:19551915-19552281 Satlength=367 Nr of Repeats=11 RepeatLength=14  
seed=ACAAACTACA Num.seqs=7 Similarity=0.931973  
10 ACTACANACTACAA  
Rev.of\_WB235\_1:13600712-13601694 Satlength=983 Nr of Repeats=52  
RepeatLength=14 seed=TGTAGTATGT Num.seqs=42 Similarity=0.960511  
20 ACTACATACTACAT  
WB235\_4:1624502-1624593 Satlength=92 Nr of Repeats=6 RepeatLength=14  
seed=ACTACACACT Num.seqs=5 Similarity=1.000000  
21 ACTACACACTACAC

\*\*\*\* \*

Consensus:

ACTACAaACTACAA

>WB235\_Fam\_20\_12\_15 Nr. of seq. 15 Alignment length(with gaps) = 14  
Alignment score = 0.745805  
WB235\_4:15410980-15411070 Satlength=91 Nr of Repeats=8 RepeatLength=10  
seed=TGTTATGATA Num.seqs=5 Similarity=0.763636  
0 TG-T-TATG--ATA  
Rev.of\_WB235\_1:11145522-11145582 Satlength=61 Nr of Repeats=5  
RepeatLength=12 seed=TATACATATA Num.seqs=5 Similarity=1.000000  
0 TG-TATATG-TATA  
WB235\_1:11342672-11342750 Satlength=79 Nr of Repeats=6 RepeatLength=12  
seed=TATATGTATA Num.seqs=5 Similarity=1.000000  
8 TG-TATATG-TATA  
WB235\_1:14430493-14430609 Satlength=117 Nr of Repeats=10 RepeatLength=12  
seed=ATATGTATAT Num.seqs=6 Similarity=0.888889  
9 TG-TATATG-TATA

WB235\_2:2000885-2001197 Satlength=313 Nr of Repeats=26 RepeatLength=12  
seed=ATGTATATGT Num.seqs=26 Similarity=0.950769  
11 TG-TATATG-TATA  
Rev.of\_WB235\_2:3471040-3471110 Satlength=71 Nr of Repeats=4  
RepeatLength=12 seed=ATACATATAC Num.seqs=3 Similarity=1.000000  
11 TG-TATATG-TATA  
Rev.of\_WB235\_3:12538530-12538668 Satlength=139 Nr of Repeats=11  
RepeatLength=12 seed=TATACATATA Num.seqs=10 Similarity=1.000000  
0 TG-TATATG-TATA  
WB235\_4:1438688-1438742 Satlength=55 Nr of Repeats=4 RepeatLength=12  
seed=TATATGTATA Num.seqs=3 Similarity=1.000000  
8 TG-TATATG-TATA  
WB235\_5:18475570-18475679 Satlength=110 Nr of Repeats=6 RepeatLength=12  
seed=GTATATGTAT Num.seqs=5 Similarity=0.955556  
7 TG-TATATG-TATA  
Rev.of\_WB235\_5:19038887-19039001 Satlength=115 Nr of Repeats=9  
RepeatLength=12 seed=ATACATATAC Num.seqs=8 Similarity=1.000000  
11 TG-TATATG-TATA  
WB235\_5:19957566-19957879 Satlength=314 Nr of Repeats=8 RepeatLength=12  
seed=TATGTATATG Num.seqs=6 Similarity=1.000000  
10 TG-TATATG-TATA  
Rev.of\_WB235\_5:19966309-19966447 Satlength=139 Nr of Repeats=11  
RepeatLength=12 seed=ATATACATAT Num.seqs=10 Similarity=1.000000  
7 TG-TATATG-TATA  
WB235\_5:19043595-19043791 Satlength=197 Nr of Repeats=8 RepeatLength=12  
seed=ATATGTATAT Num.seqs=5 Similarity=0.777778  
11 TA-TNTATA-TNTA  
WB235\_5:19047920-19048249 Satlength=330 Nr of Repeats=23 RepeatLength=14  
seed=TATATGTTAT Num.seqs=22 Similarity=0.960421  
10 TGTTATATGTTATA  
Rev.of\_WB235\_6:16158526-16158670 Satlength=145 Nr of Repeats=9  
RepeatLength=14 seed=TACCATATAC Num.seqs=7 Similarity=0.841270  
12 TGGTATATGGTATA

\* \* \*\*\* \*\*

Consensus:

TGTATATGTATA

>WB235\_Fam\_21\_18\_14 Nr. of seq. 14 Alignment length(with gaps) = 18  
Alignment score = 0.786121  
WB235\_2:4210804-4210907 Satlength=104 Nr of Repeats=5 RepeatLength=18  
seed=TGCAAGACTA Num.seqs=3 Similarity=0.950617  
0 TGCAAGACTAATAGAGAC  
WB235\_3:922387-922734 Satlength=348 Nr of Repeats=8 RepeatLength=18  
seed=TGCAAGACTA Num.seqs=5 Similarity=0.822222  
0 TGCAAGACTAATAGAGAC  
Rev.of\_WB235\_2:14355352-14355470 Satlength=119 Nr of Repeats=5  
RepeatLength=18 seed=TAGTCTTGCA Num.seqs=3 Similarity=0.901235  
10 TGCAAGACTAATAGAGGC  
WB235\_6:13423594-13423926 Satlength=333 Nr of Repeats=8 RepeatLength=18  
seed=TGCAAGACTA Num.seqs=5 Similarity=0.851852  
18 TGCAAGACTAATAGAGGC

WB235\_5:3332437-3332702 Satlength=266 Nr of Repeats=4 RepeatLength=18  
seed=TGCAAGACTA Num.seqs=3 Similarity=0.876543  
18 TGCAAGACTANTAGAGGC  
Rev.of\_WB235\_6:7574716-7575007 Satlength=292 Nr of Repeats=5  
RepeatLength=18 seed=TAGTCTTGCA Num.seqs=3 Similarity=0.901235  
10 TGCAAGACTATTAGAGGC  
WB235\_6:14323895-14325001 Satlength=1107 Nr of Repeats=10 RepeatLength=18  
seed=TGCAAGACTA Num.seqs=6 Similarity=0.841975  
0 TGCAAGACTAATAAAGGC  
Rev.of\_WB235\_4:3834124-3834445 Satlength=322 Nr of Repeats=5  
RepeatLength=18 seed=ATTAGTATTG Num.seqs=3 Similarity=0.802469  
12 TGCAATACTAATAGGGAG  
WB235\_6:11859496-11859817 Satlength=322 Nr of Repeats=5 RepeatLength=18  
seed=TGCAATACTA Num.seqs=3 Similarity=0.901235  
18 TGCAAGACTAATAGGGAG  
Rev.of\_WB235\_4:17134995-17135342 Satlength=348 Nr of Repeats=5  
RepeatLength=18 seed=GCACTCCCTA Num.seqs=3 Similarity=0.950617  
21 TGCAAGACTATTAGGGAG  
Rev.of\_WB235\_5:12370870-12371218 Satlength=349 Nr of Repeats=5  
RepeatLength=18 seed=GCACTCCCTA Num.seqs=3 Similarity=0.950617  
21 TGCAAGACTATTAGGGAG  
Rev.of\_WB235\_6:16135006-16135334 Satlength=329 Nr of Repeats=5  
RepeatLength=18 seed=ATTAGTTTGT Num.seqs=3 Similarity=0.950617  
12 TGCAAACTAATAGAGAG  
Rev.of\_WB235\_3:922819-923128 Satlength=310 Nr of Repeats=5  
RepeatLength=18 seed=TAGTGCTGCA Num.seqs=3 Similarity=0.777778  
10 TGCAGCACTANTAGAGAC  
WB235\_3:3794723-3795033 Satlength=311 Nr of Repeats=5 RepeatLength=18  
seed=TGCAGCACTA Num.seqs=3 Similarity=0.851852  
18 TGCAGCACTATTAGAGAC

\*\*\*\* \* \* \*

Consensus:

TGCAAGACTAaTAGaGac

>WB235\_Fam\_22\_59\_11 Nr. of seq. 11 Alignment length(with gaps) = 62  
Alignment score = 0.794330  
WB235\_1:3990050-3990699 Satlength=650 Nr of Repeats=11 RepeatLength=59  
seed=AAAACCACTG Num.seqs=11 Similarity=0.799486  
0 AAAACCACTGCACATTTGAAATT-CCATA--TTCTCCATAATTTTCAGTTTAAATATTTTG  
Rev.of\_WB235\_3:8958876-8960427 Satlength=1552 Nr of Repeats=21  
RepeatLength=59 seed=TTCAAACTT Num.seqs=20 Similarity=0.972643  
2 AAAACCACTGCACATTTGAAATT-CCATA--TTCTCCATAAATCTCAGTTTAAAAAGTTTTG  
Rev.of\_WB235\_5:6219658-6220602 Satlength=945 Nr of Repeats=16  
RepeatLength=59 seed=ATGTGCACTG Num.seqs=16 Similarity=0.951601  
15 AAAACCACTGCACATTTGAAATT-CCATA--TTCTCCATTATTCTCAGTTTAAAAATTTTTG  
WB235\_3:13074772-13086747 Satlength=11976 Nr of Repeats=206  
RepeatLength=59 seed=TCTCCATAAT Num.seqs=197 Similarity=0.927617  
29 AAAACAGTGCACATTTGAAATT-CCATA--TTCTCCATAATTCTCAGTTTAAAAAATTTTG  
Rev.of\_WB235\_3:10224644-10226007 Satlength=1364 Nr of Repeats=23  
RepeatLength=59 seed=AAATGTGCAC Num.seqs=20 Similarity=0.928397  
17 AAAACCACTGCACATTT-AAATTTCCATA--TTCTCCATAATTCTCAGTTTAAAAAATTTTG

Rev.of\_WB235\_5:3056063-3056653 Satlength=591 Nr of Repeats=10  
RepeatLength=59 seed=AATTTCAAAT Num.seqs=10 Similarity=0.895123  
23 AAAACCAAGTGCACATTTGAAATTNCCATA--TTTCCATAATTCTCAGTTTAAAAATTTTG  
Rev.of\_WB235\_5:17384240-17394505 Satlength=10266 Nr of Repeats=173  
RepeatLength=59 seed=ATGGTGAATA Num.seqs=165 Similarity=0.936880  
36 AAAACCAAGTGCACATTTGAATTT-CCATA--TTCACCATAATTCTCGGTTTTAAAAATTTTG  
Rev.of\_WB235\_2:891126-892012 Satlength=887 Nr of Repeats=12  
RepeatLength=59 seed=CAAATTTTTT Num.seqs=11 Similarity=0.987673  
0 AAAACCAAGTTTCATTTAAAAAT-CCATA--TTTCCATAATTCTCAGTTTAAAAAATTTG  
Rev.of\_WB235\_3:1017334-1020579 Satlength=3246 Nr of Repeats=55  
RepeatLength=59 seed=TGTGCACTGG Num.seqs=55 Similarity=0.955928  
14 AAAACCAAGTGCACATTT-AAATT--TATATTTTTTCCATAATTCTCAGTTTAAAAAGTTTTG  
WB235\_4:12169299-12171242 Satlength=1944 Nr of Repeats=24 RepeatLength=59  
seed=TTTTAAAAAT Num.seqs=23 Similarity=0.964628  
45 AAAACCAAGTGAAGTCTTGATATT-CCATA--TTCTCCATAATTCTCGGTTTTAAAAATTTTG  
Rev.of\_WB235\_5:6942140-6942965 Satlength=826 Nr of Repeats=14  
RepeatLength=59 seed=AATTCAAGAC Num.seqs=13 Similarity=0.956541  
81 AAAACCAAGTGAAGTCTTGATTT-CCATA--TTCCCATAATTCTCGGTTTTAAATTTTTTG

\*\*\*\* \* \* \* \* \* \* \* \* \* \* \* \* \* \* \* \* \* \*

Consensus:

AAAACCAAGTGCACATTTgAAATTCCATATTcTCCATAATTCTCaGTTTaAAAAaTTTTG

>WB235\_Fam\_23\_32\_11 Nr. of seq. 11 Alignment length(with gaps) = 35  
Alignment score = 0.789437  
WB235\_5:20268029-20268566 Satlength=538 Nr of Repeats=15 RepeatLength=31  
seed=CTACAAACTA Num.seqs=9 Similarity=0.899642  
0 CTACAAACTACG-A-G-TTTTGGGCGCTGCTAAG-  
Rev.of\_WB235\_5:18888872-18889346 Satlength=475 Nr of Repeats=14  
RepeatLength=32 seed=TTGTAGTTTG Num.seqs=9 Similarity=0.939815  
13 CTACAAACTACA-A-A-TTTTGGGCGCTGCTTAGA  
WB235\_5:19933050-19934036 Satlength=987 Nr of Repeats=29 RepeatLength=32  
seed=ACTACAAACT Num.seqs=22 Similarity=0.934365  
31 CTACAAACTACA-A-G-TTTTGGGCGCTGCTTAGA  
WB235\_5:20101712-20102976 Satlength=1265 Nr of Repeats=44 RepeatLength=32  
seed=TTTGGGCGC Num.seqs=27 Similarity=0.907170  
14 CTACAAACTACA-A-T-TTTTGGGCGCTGCTTAGA  
WB235\_6:188398-190104 Satlength=1707 Nr of Repeats=53 RepeatLength=32  
seed=CGCTGCTAAG Num.seqs=43 Similarity=0.970561  
21 CTACAAACTACA-AG--TTTGGGCGCTGCTAAGA  
Rev.of\_WB235\_5:19117969-19118122 Satlength=154 Nr of Repeats=5  
RepeatLength=33 seed=TTAGCAGCGC Num.seqs=4 Similarity=0.979798  
30 CTACAAACTACA-AGA-TTTTGGGCGCTGCTAAGA  
Rev.of\_WB235\_5:19122509-19124474 Satlength=1966 Nr of Repeats=65  
RepeatLength=33 seed=AGCAGCGCCC Num.seqs=49 Similarity=0.900143  
61 CTACAAACTACA-AGA-TTTTGGGCGCTGCTAAGA  
WB235\_5:20273044-20275266 Satlength=2223 Nr of Repeats=68 RepeatLength=31  
seed=GGCGCTGCTA Num.seqs=43 Similarity=0.966992  
19 CTACAAACTACA-A-G-ATTTGGGCGCTGCTAA-A  
Rev.of\_WB235\_6:161009-161190 Satlength=182 Nr of Repeats=5  
RepeatLength=32 seed=TGTAGTTTGT Num.seqs=4 Similarity=0.881944  
44 CTACAAACTACA-A-G-ATTTGGGCGCTGCTAACA



Rev.of\_WB235\_5:20263899-20264125 Satlength=227 Nr of Repeats=7  
RepeatLength=32 seed=TTAGCAGCGC Num.seqs=5 Similarity=0.931313  
30 CTACAAACTACA-A-GTTTTTGGGCGCTGCTAA-A  
Rev.of\_WB235\_5:18989479-18989970 Satlength=492 Nr of Repeats=14  
RepeatLength=32 seed=TGTAGTTTGT Num.seqs=9 Similarity=0.905443  
12 CTACAAACTACACA-A-TTTTGGGCGCTGCTAA-A

\*\*\*\*\* \* \*\*\*\*\* \*  
Consensus:

CTACAAACTACAAnTTTTGGGCGCTGCTaAgA

>WB235\_Fam\_24\_20\_11 Nr. of seq. 11 Alignment length(with gaps) = 21  
Alignment score = 0.822222  
WB235\_1:1852567-1852667 Satlength=101 Nr of Repeats=5 RepeatLength=20  
seed=CTAGGCAGAC Num.seqs=5 Similarity=1.000000  
0 CTAGGCAG-ACTTAGCCTACC  
WB235\_1:3427447-3429127 Satlength=1681 Nr of Repeats=81 RepeatLength=20  
seed=GGCAGACCTA Num.seqs=78 Similarity=0.844356  
3 CTAGGCAG-ACCTAGCCTACC  
Rev.of\_WB235\_3:5285020-5285610 Satlength=591 Nr of Repeats=28  
RepeatLength=20 seed=CTAGGTCTGC Num.seqs=25 Similarity=0.872444  
14 CTAGGCAG-ACCTAGCCTACC  
Rev.of\_WB235\_3:5285044-5285922 Satlength=879 Nr of Repeats=40  
RepeatLength=20 seed=GGTAGGCTAG Num.seqs=28 Similarity=0.844293  
20 CTAGGCAG-ACCTAGCCTACC  
WB235\_6:1508523-1508943 Satlength=421 Nr of Repeats=18 RepeatLength=20  
seed=AGGCAGACCT Num.seqs=16 Similarity=0.885556  
22 CTAGGCAG-ACCTAGCCTACC  
WB235\_5:904415-904569 Satlength=155 Nr of Repeats=8 RepeatLength=20  
seed=GGCAGACCTA Num.seqs=7 Similarity=0.809524  
3 CTAGGCAG-ACCTAGTCTACC  
WB235\_3:2470723-2471262 Satlength=540 Nr of Repeats=27 RepeatLength=20  
seed=GACCCAGCCT Num.seqs=26 Similarity=0.980718  
7 CCAGGCAG-ACCCAGCCTACC  
WB235\_3:2470728-2471526 Satlength=799 Nr of Repeats=40 RepeatLength=20  
seed=AGCCTACCCC Num.seqs=38 Similarity=0.909815  
12 CCAGGCAG-ACCCAGCCTACC  
WB235\_5:904306-904460 Satlength=155 Nr of Repeats=7 RepeatLength=20  
seed=CCTACCCCAG Num.seqs=6 Similarity=0.871111  
14 CCAGGCAG-ACCTAGCCTACC  
WB235\_1:1852477-1852561 Satlength=85 Nr of Repeats=4 RepeatLength=21  
seed=CCTACTCTAG Num.seqs=4 Similarity=1.000000  
15 CTAGGCAGCCCCTAGCCTACT  
Rev.of\_WB235\_6:15738820-15738988 Satlength=169 Nr of Repeats=8  
RepeatLength=21 seed=GGCTGCCGAG Num.seqs=8 Similarity=0.916100  
31 CTCGGCAGCCCCTAGCCTACC

\* \*\*\*\*\* \* \*\* \*\*\*\*\*  
Consensus:

CtAGGCAGACCTAGCCTACC

>WB235\_Fam\_25\_12\_11 Nr. of seq. 11 Alignment length(with gaps) = 12  
Alignment score = 0.746970  
WB235\_2:2151844-2151904 Satlength=61 Nr of Repeats=4 RepeatLength=11  
seed=ACCGCAACGC Num.seqs=3 Similarity=1.000000  
0 AC-CGCAACGCA  
Rev.of\_WB235\_5:20605796-20606242 Satlength=447 Nr of Repeats=40  
RepeatLength=11 seed=GTTGCGGTTG Num.seqs=39 Similarity=0.965976  
8 AC-CGCAACGCA  
Rev.of\_WB235\_3:1976102-1976245 Satlength=144 Nr of Repeats=11  
RepeatLength=11 seed=GTCGCGTTGC Num.seqs=9 Similarity=0.885522  
2 AC-CGCAACGCG  
Rev.of\_WB235\_1:565592-565664 Satlength=73 Nr of Repeats=6 RepeatLength=12  
seed=GCGTTGCGTG Num.seqs=6 Similarity=0.896296  
4 ACGCGGCACGCA  
WB235\_1:2254186-2255835 Satlength=1650 Nr of Repeats=87 RepeatLength=12  
seed=CACGCAACGC Num.seqs=80 Similarity=0.934001  
6 ACGCAGCACGCA  
Rev.of\_WB235\_1:11253589-11254333 Satlength=745 Nr of Repeats=60  
RepeatLength=12 seed=CGTTGCGTGT Num.seqs=58 Similarity=0.901727  
15 ACGCGACACGCA  
WB235\_3:12987113-12987245 Satlength=133 Nr of Repeats=7 RepeatLength=12  
seed=CGCGACACGC Num.seqs=5 Similarity=0.822222  
25 ACGCGACACGCA  
Rev.of\_WB235\_4:4166741-4166830 Satlength=90 Nr of Repeats=7  
RepeatLength=12 seed=GTTGCGTGTC Num.seqs=6 Similarity=0.962963  
26 ACGCGACACGCA  
Rev.of\_WB235\_4:4166744-4167306 Satlength=563 Nr of Repeats=46  
RepeatLength=12 seed=GCGTGTCGCG Num.seqs=44 Similarity=0.893587  
23 ACGCGACACGCA  
WB235\_5:17587204-17587343 Satlength=140 Nr of Repeats=10 RepeatLength=12  
seed=ACGCGACACG Num.seqs=8 Similarity=0.972222  
24 ACGCGACACGCA  
WB235\_5:17364710-17364818 Satlength=109 Nr of Repeats=9 RepeatLength=12  
seed=CGCAACGCGA Num.seqs=9 Similarity=0.907407  
8 ACGCGATACGCA

\*\* \* \*\*\*\*

Consensus:

ACgCGacACGCA

>WB235\_Fam\_26\_26\_10 Nr. of seq. 10 Alignment length(with gaps) = 27  
Alignment score = 0.768999  
WB235\_2:5097197-5097899 Satlength=703 Nr of Repeats=27 RepeatLength=26  
seed=TTAGACCATT Num.seqs=27 Similarity=0.928117  
0 TTAGACCATTAGATGAATTTTCAAAG  
Rev.of\_WB235\_4:4416113-4421995 Satlength=5883 Nr of Repeats=213  
RepeatLength=26 seed=GTCTAACTTT Num.seqs=207 Similarity=0.933392  
6 TTAGACCATTAGATGAATTTTCAAAG  
WB235\_4:13115382-13116006 Satlength=625 Nr of Repeats=24 RepeatLength=26  
seed=ATTAGATGAA Num.seqs=24 Similarity=0.974173  
7 TTAGACCATTAGATGAATTTTCAAAG

WB235\_5:5073280-5076759 Satlength=3480 Nr of Repeats=131 RepeatLength=26  
seed=AAAGTTAGAC Num.seqs=113 Similarity=0.928636  
22 TTAGACCATTAGATGAATTTC-CAAAG  
WB235\_3:7594698-7597267 Satlength=2570 Nr of Repeats=98 RepeatLength=26  
seed=ATTAGATGAA Num.seqs=93 Similarity=0.955479  
7 TTAGACCATTAGATGAATTCC-CAAAG  
Rev.of\_WB235\_6:15687867-15688727 Satlength=861 Nr of Repeats=33  
RepeatLength=26 seed=AATTCATCTA Num.seqs=32 Similarity=0.950269  
19 TTAGACCAGTAGATGAATTCC-CAAAG  
WB235\_6:11787527-11789550 Satlength=2024 Nr of Repeats=75 RepeatLength=26  
seed=AAAGTTAGAC Num.seqs=72 Similarity=0.907026  
22 TTAGACCATTAGATGAATTTA-TAAAG  
Rev.of\_WB235\_6:15597064-15597272 Satlength=209 Nr of Repeats=8  
RepeatLength=26 seed=GGTCTAACTT Num.seqs=8 Similarity=0.899267  
7 TTAGACCGTCAGATCCATTTA-TAAAG  
Rev.of\_WB235\_6:5913335-5915857 Satlength=2523 Nr of Repeats=97  
RepeatLength=26 seed=TTCTAAATTT Num.seqs=97 Similarity=0.940589  
6 TTAGAACGGTAGATGAATTTT-CAAAAT  
Rev.of\_WB235\_4:13464747-13465805 Satlength=1059 Nr of Repeats=13  
RepeatLength=27 seed=TTTTTAAAT Num.seqs=11 Similarity=0.892256  
26 TTAGAACGGTATATGAATTTTAAAAAG

\*\*\*\*\* \* \* \*\* \*\*\* \*\*\*

Consensus:

TTAGAcCatTAGATGAATTtccAAAG

>WB235\_Fam\_27\_21\_10 Nr. of seq. 10 Alignment length(with gaps) = 23  
Alignment score = 0.611433  
WB235\_6:920806-920909 Satlength=104 Nr of Repeats=5 RepeatLength=20  
seed=ATGCACTGAC Num.seqs=3 Similarity=0.866667  
0 AT-GCACTGACCAAAAATATG--  
Rev.of\_WB235\_6:954503-954587 Satlength=85 Nr of Repeats=4 RepeatLength=21  
seed=CAGTGCAATTC Num.seqs=4 Similarity=0.830688  
8 AT-GCACTGACCAAAAGTTCTGA-  
Rev.of\_WB235\_6:954523-954714 Satlength=192 Nr of Repeats=6  
RepeatLength=21 seed=TCAGTGCAAT Num.seqs=4 Similarity=0.735450  
9 AT-GCACTGACCAAACTTCTGA-  
Rev.of\_WB235\_6:1016701-1016827 Satlength=127 Nr of Repeats=6  
RepeatLength=21 seed=GTCAGTGCAAT Num.seqs=6 Similarity=0.944974  
10 AT-GCACTGACCGAAACTATCA-  
Rev.of\_WB235\_6:1022677-1022779 Satlength=103 Nr of Repeats=5  
RepeatLength=20 seed=TTGGTCAGTG Num.seqs=3 Similarity=0.955556  
13 AT-GCACTGACCAAGACTA-AA-  
Rev.of\_WB235\_6:3693989-3694090 Satlength=102 Nr of Repeats=5  
RepeatLength=20 seed=TTTGGTCAGT Num.seqs=4 Similarity=0.933333  
14 AA-GCACTGACCAAA-ATA-GAA  
WB235\_6:863878-863962 Satlength=85 Nr of Repeats=4 RepeatLength=21  
seed=ACTGACCAAA Num.seqs=4 Similarity=0.936508  
25 AT-GCACTGACCAAAAATA-GAT  
WB235\_6:1296886-1296996 Satlength=111 Nr of Repeats=5 RepeatLength=22  
seed=TCGCACTGAC Num.seqs=5 Similarity=0.915152  
22 ATCGCACTGACCAAACTTA-GAA

Rev.of\_WB235\_6:703442-703568 Satlength=127 Nr of Repeats=5  
RepeatLength=21 seed=GGTCAGTGCA Num.seqs=4 Similarity=0.904762  
32 AT-GCACTGACCAAAATTG-GTA  
Rev.of\_WB235\_6:1058514-1058619 Satlength=106 Nr of Repeats=4  
RepeatLength=21 seed=GTCAGTGCAA Num.seqs=3 Similarity=0.661376  
10 TT-GCACTGACCANNACTCTAA-

\*\*\*\*\* \*

Consensus:

ATGCACTGACCAAAanTatga

>WB235\_Fam\_28\_163\_9 Nr. of seq. 9 Alignment length(with gaps) = 170  
Alignment score = 0.739924  
WB235\_1:976735-977538 Satlength=804 Nr of Repeats=5 RepeatLength=162  
seed=ATCATATGAA Num.seqs=4 Similarity=0.781893  
0 ATCATATGAAGCGATTCTTTTTCTTTTATAAACCTGTTTCAAGATTGGCAAACTACCAGAAAATAC-  
TAAACAAATTAGGCTAGCATGAACGGAAGTA-TTTTTT-A-AAAATTGAT-AAAAATA-ATGAAAAGCTG-A-  
TATTTTCAAAATTCAGAAATGACGGAAAA  
Rev.of\_WB235\_2:2050346-2051160 Satlength=815 Nr of Repeats=5  
RepeatLength=162 seed=AGTTTTATGA Num.seqs=3 Similarity=0.983539  
36  
ATCATATAGAGTCATTCTTTTTTATTTTCATAAACTCTTCAGCATAGTCAAAAATACCAGAAAATGC-  
TAAACAAAGTATAATAGTTTGTACGGAAGTA-TTTTTT-A-AAAATGGAT-AAAAATATAT-AAAAGCTG-A-  
TTTTTTCAAAAATTCAAAAGTATGGGAAA  
WB235\_1:10851626-10855375 Satlength=3750 Nr of Repeats=23  
RepeatLength=163 seed=GCATAGTCAA Num.seqs=23 Similarity=0.935660  
41  
ATCATATGGAGTCATTCTTTTTTATCTCAAAAACTGTTTCAAGCATAGTCAAAAATACCAGCAAATAC-  
CAAACAGAGTATATTAGCTTGTACGGAAGTA-TTTTTT-AGAAAATTGAT-AAAAATATAT-AAAAGCTG-A-  
TTTTTTCAAAAATTCAAAAGTATGGGAAA  
Rev.of\_WB235\_2:15186190-15187654 Satlength=1465 Nr of Repeats=9  
RepeatLength=163 seed=AAATAAAAAA Num.seqs=8 Similarity=0.966696  
190  
ATCATATGGAGTCATTCTTTTTTATTTTCATAAACTGTTTCAAGCATAGTTAAAATTACCAGAATATGC-  
CAATCAAAGTATATTAGCTTGTACGGAAGTATTTTTTT-A-AAAATTGAT-AAAAATATAT-AAAAGCTG-A-  
TTTTTTCAAAAATTCAAAAGTATGGGAAA  
WB235\_3:10226211-10227863 Satlength=1653 Nr of Repeats=11  
RepeatLength=164 seed=TATGGGAAAA Num.seqs=9 Similarity=0.973351  
318  
ATCATATGGAGTCATTCTTTTTTATTGCATAAACTGTTTCAAGTATAGTCAAAAATACCAGAATATGC-  
CAATCAAAGTATAATAGCTTGTACGGAAGTATTTTTTT-A-AAAATTGATAAAAAATATAT-AAAAGCTG-A-  
TTTTTTCAAAAATTCAAAAGTATGGGAAA  
Rev.of\_WB235\_5:16330598-16333224 Satlength=2627 Nr of Repeats=16  
RepeatLength=164 seed=AAAAAATCAG Num.seqs=12 Similarity=0.959226  
303  
ATCATATGGAGTCATTCTTTTTTATTTTCATAAAAATGTTTCAAGCATAGTCAAAAACACCAGAATATGC-  
CAATCAAAGTATAATAGCTTGTACGGAAGTATTTTTTT-A-AAAATTGAT-AAAAATATAT-AAAATCTG-  
ATTTTTTTCAAAAATTCAAAAGTCCTAGAAA  
Rev.of\_WB235\_5:14586076-14591096 Satlength=5021 Nr of Repeats=31  
RepeatLength=162 seed=TTCCGTACAA Num.seqs=29 Similarity=0.941779  
95  
ATCATATGAAGTCATTCTTTTTTATTTTATAGAACTGTTTCAAGCACAACCAAATATACCAGAAAATGC-

CAAAACAAAGTATGCTAGCTTGTACGGAAGTTAATTTTT-A-AAAATTCAG--AAATTAACCAGAAGCTA-T-TATTTTTCAAAAATTCAAAAGTAAGGGAAA

Rev.of\_WB235\_2:2361743-2363537 Satlength=1795 Nr of Repeats=9  
RepeatLength=163 seed=TGAATTTTTG Num.seqs=7 Similarity=0.906387  
150

ATCATATGAAGTCATTCTTTTTTATTTTATAAACTGTTTACGATAGTCAAATGTACCAGAAAATACTTAAAA  
AAAG-GTGCTAGCTCGTACGGAAGTTTATTTTAA-AAAATGCAG--AATTTAACCAAAAGCTG-T-  
TATTTTCAAAAATTCAAAAGTACCTCAA

WB235\_4:2573920-2576033 Satlength=2114 Nr of Repeats=13 RepeatLength=164  
seed=CTTTTTCTT Num.seqs=12 Similarity=0.979921  
180

ATCATAAAAAAGTGCTTCTTTTTTCTTTTATAACACTGTTTAGCATAGTCAAATATACCAGAAAATAC-  
CAAAACAAAGTATGCTATCTTGTACGAAAGATTATTTTA-A-AAAATTCAG--AAAATGCATCTAAAGCGGTT-  
TTTTTTCAAAAATTCAAAAGTACCGGAAA

\*\*\*\*\* \*\* \*\*\*\*\* \* \* \* \* \* \* \* \* \* \*  
\* \* \*\* \* \* \* \* \* \* \* \* \* \* \* \* \* \* \*  
\*\*\*\*\* \* \* \* \* \* \* \* \* \* \* \* \* \* \* \*

Consensus:

ATCATATggAGTcATTCTTTTTTaTTTcATAAACTGTTTcAGcATAGtCAAAaATACCAGAAaATgCcAAaCA  
AAGTATanTAGCTTGTACGGAAGTattTTTTTAAAAATtgAtaaAAATatAtAAAAGCTGaTtTTTTCAAAA  
TTCAAAAGTAngggAAA

>WB235\_Fam\_29\_42\_9 Nr. of seq. 9 Alignment length(with gaps) = 42  
Alignment score = 0.733686

WB235\_1:961892-962564 Satlength=673 Nr of Repeats=16 RepeatLength=42  
seed=CCGGAATTT Num.seqs=16 Similarity=0.888889

0 CCGGAATTTTCGAAAACCGGCAATTGCCGAAATTGCCGATTG

WB235\_2:3572146-3572433 Satlength=288 Nr of Repeats=6 RepeatLength=42  
seed=TTTGAAAACC Num.seqs=4 Similarity=0.851852

8 CCGGAATTTTGAAAACCGGCAATAGCCGAAATTGCCGAGTG

Rev.of\_WB235\_5:20315897-20316651 Satlength=755 Nr of Repeats=12  
RepeatLength=42 seed=ATTGCCGTT Num.seqs=9 Similarity=0.803351

24 CCGAAAATTTTAAAAACCGGCAATTGCCGAAATTGCCGATTG

WB235\_5:3816982-3817234 Satlength=253 Nr of Repeats=6 RepeatLength=42  
seed=ACCGCAATT Num.seqs=6 Similarity=0.881481

15 CTGAAAATTTCCAAAACCGGCAATTGCCAAAATTGCCGATTG

WB235\_2:14192423-14193096 Satlength=674 Nr of Repeats=16 RepeatLength=42  
seed=AAAACCGGCA Num.seqs=10 Similarity=0.749832

12 CCGGNAATATTAAAAACCGGCAATTGCCGAAATTGCCGATTG

Rev.of\_WB235\_2:1630503-1630898 Satlength=396 Nr of Repeats=5  
RepeatLength=42 seed=TTGCCGTTG Num.seqs=3 Similarity=0.809524

23 CAAAAAATTTTCGGCAACCGGCAATTGCCGAAGTTGCCGAACC

WB235\_2:1635206-1635601 Satlength=396 Nr of Repeats=5 RepeatLength=42  
seed=CAACCGGCAA Num.seqs=3 Similarity=0.809524

55 CAAAAAATTTTCGGCAACCGGCAATTGCCGAAGTTGCCGAACC

WB235\_5:16191704-16191915 Satlength=212 Nr of Repeats=6 RepeatLength=42  
seed=TTTCGGCAAC Num.seqs=4 Similarity=0.899471

49 CGAAAAATTTTCGGCAACCGGCAATTGCCGATGTTGCCGAACC

WB235\_2:12577021-12577399 Satlength=379 Nr of Repeats=8 RepeatLength=42  
seed=TTGCCGAACC Num.seqs=7 Similarity=0.797619

32 GTAAAAATTTTCGGCAACCGGCAATTGCCAAAGTTGCCGAACC

\*\*\* \* \*\*\*\* \* \*\*\* \*\*\* \*\*\*\*\*

Consensus:

CngaAAATTTcgaaAACCGGCAATTGCCgAAaTTGCCGAntg

>WB235\_Fam\_30\_31\_9 Nr. of seq. 9 Alignment length(with gaps) = 37  
Alignment score = 0.708709  
WB235\_3:2110682-2111451 Satlength=770 Nr of Repeats=22 RepeatLength=31  
seed=ATTTCCCGCC Num.seqs=14 Similarity=0.922486  
0 ATTTCCCGCCAAAAATA---TTT---GAAAATTTGA  
Rev.of\_WB235\_5:18169395-18171299 Satlength=1905 Nr of Repeats=61  
RepeatLength=31 seed=GTCAATTTTT Num.seqs=48 Similarity=0.882004  
20 ATTTCCCGCCAAAAATTG---ACT---GAAAATTTGA  
WB235\_5:19535226-19535475 Satlength=250 Nr of Repeats=6 RepeatLength=31  
seed=AATTTCCCGC Num.seqs=5 Similarity=0.756250  
30 ATTTCCCGCCAAAAATTG---ACT---GAAAATTTGA  
Rev.of\_WB235\_5:19630875-19631274 Satlength=400 Nr of Repeats=12  
RepeatLength=31 seed=GGCGGGAAAT Num.seqs=8 Similarity=0.930876  
41 ATTTCCCGCCAAAAATTG---ACT---GAAAATTTGA  
WB235\_5:19689942-19690431 Satlength=490 Nr of Repeats=10 RepeatLength=31  
seed=AAAATTTGAA Num.seqs=9 Similarity=0.942652  
22 ATTTCCCGCCAAAAATTG---ACT---GAAAATTTGA  
Rev.of\_WB235\_5:19376610-19376889 Satlength=280 Nr of Repeats=9  
RepeatLength=31 seed=CGGGAAATTC Num.seqs=7 Similarity=0.774706  
39 ATTTCCCGCCAAAAATTA---ACT---GAAAATTTGA  
Rev.of\_WB235\_5:19615691-19616051 Satlength=361 Nr of Repeats=8  
RepeatLength=31 seed=TTCAAATTTT Num.seqs=7 Similarity=0.819764  
32 AATTTCCCGCCAAAAATTG---ACT---GAAAATTTGA  
WB235\_5:19863556-19864754 Satlength=1199 Nr of Repeats=28 RepeatLength=31  
seed=TTCCCGCCTA Num.seqs=17 Similarity=0.854243  
2 ATTTCCCGCCTAAACT---ACTC---GAAAATTCAA  
Rev.of\_WB235\_5:18666434-18666663 Satlength=230 Nr of Repeats=6  
RepeatLength=35 seed=GGAAATTCAA Num.seqs=4 Similarity=0.776235  
6 ATTTTCCGCCAAAAATATTTTCT-CCGAAAATTTGA

\* \*\* \*\*\*\*\* \*\*\*\* \* \* \*\*\*\*\* \*

Consensus:

ATTTCCCGCCAAAAATgACTGAAAATTTGA

>WB235\_Fam\_31\_26\_9 Nr. of seq. 9 Alignment length(with gaps) = 26  
Alignment score = 0.798789  
WB235\_4:11610541-11615517 Satlength=4977 Nr of Repeats=199  
RepeatLength=25 seed=CATTACGGCA Num.seqs=198 Similarity=0.948255  
0 CATTACGGCAGATTCTA-TAAATTGG  
Rev.of\_WB235\_4:14209284-14209609 Satlength=326 Nr of Repeats=13  
RepeatLength=25 seed=TAATGCCAAT Num.seqs=13 Similarity=0.948034  
5 CATTACGGCAGATTCTA-TAAATTGG  
Rev.of\_WB235\_6:11441051-11442751 Satlength=1701 Nr of Repeats=68  
RepeatLength=25 seed=CCGTAATGCC Num.seqs=68 Similarity=0.907381  
8 CATTACGGCAGATTCTA-TAAATTGG

Rev.of\_WB235\_1:4540371-4544820 Satlength=4450 Nr of Repeats=169  
RepeatLength=26 seed=AAATCCGCCG Num.seqs=166 Similarity=0.908932  
15 CATTGCGGCGGATTTTAGAAAAATGG  
Rev.of\_WB235\_6:1644418-1644678 Satlength=261 Nr of Repeats=10  
RepeatLength=26 seed=GCCGCAATGC Num.seqs=10 Similarity=0.971510  
35 CATTGCGGCGGATTTTAGAAAAATGG  
WB235\_6:11442777-11443790 Satlength=1014 Nr of Repeats=39 RepeatLength=26  
seed=CGGCGGATTT Num.seqs=38 Similarity=0.921509  
31 CATTGCGGCGGATTTTAGAAAAATGG  
WB235\_1:10953026-10953491 Satlength=466 Nr of Repeats=4 RepeatLength=26  
seed=TTTTTGAAAA Num.seqs=3 Similarity=0.931624  
38 CATTGCGGCGGATTTTGAAAAATGG  
WB235\_4:12730503-12732683 Satlength=2181 Nr of Repeats=84 RepeatLength=26  
seed=CATTGCGGCG Num.seqs=80 Similarity=0.917965  
26 CATTGCGGCGGATTTTCAGAAAAATGG  
WB235\_6:12607668-12607975 Satlength=308 Nr of Repeats=5 RepeatLength=26  
seed=AAAAATGGCA Num.seqs=4 Similarity=0.897436  
44 CATTGCGGCGGATTTTCAGAAAAATGG

\*\*\*\* \* \* \* \* \* \* \* \* \* \*

Consensus:

CATTgCGGcGgATTttAgaAAAaTGG

>WB235\_Fam\_32\_18\_9 Nr. of seq. 9 Alignment length(with gaps) = 23  
Alignment score = 0.628019  
WB235\_1:11485772-11485879 Satlength=108 Nr of Repeats=5 RepeatLength=19  
seed=TCAAAAATCA Num.seqs=4 Similarity=0.873611  
21 CA--TC-AAAAATCAATAA-TTT  
WB235\_1:11383715-11384049 Satlength=335 Nr of Repeats=14 RepeatLength=20  
seed=AAAAATCAAT Num.seqs=11 Similarity=0.883636  
24 CA--TCGAAAAATCAATAA-TTT  
WB235\_1:11485735-11486997 Satlength=1263 Nr of Repeats=20 RepeatLength=19  
seed=AAAAATCGAT Num.seqs=12 Similarity=0.725830  
23 CN--TC-AAAAATCGATAA-TTT  
WB235\_2:2623068-2623182 Satlength=115 Nr of Repeats=6 RepeatLength=19  
seed=AAAAATCGATA Num.seqs=6 Similarity=0.601058  
24 CA--TC-GAAAATCGATAA-TTT  
WB235\_1:11532642-11533117 Satlength=476 Nr of Repeats=17 RepeatLength=19  
seed=TTTCACAAAA Num.seqs=12 Similarity=0.943647  
35 CA---C-AAAAATCAATAATTTT  
WB235\_1:11531919-11534041 Satlength=2123 Nr of Repeats=45 RepeatLength=19  
seed=AAAAATCGATA Num.seqs=29 Similarity=0.730706  
42 CA---N-AAAAATCGATAATTTT  
WB235\_4:977829-978532 Satlength=704 Nr of Repeats=35 RepeatLength=19  
seed=CAATAATTTT Num.seqs=27 Similarity=0.905233  
28 CC-C-A-AAAAATCAATAA-TTT  
Rev.of\_WB235\_1:11384374-11386353 Satlength=1980 Nr of Repeats=95  
RepeatLength=20 seed=ATTGATTTTT Num.seqs=91 Similarity=0.879707  
32 CCTC-A-AAAAATCAATAA-TTT  
Rev.of\_WB235\_1:2364706-2365240 Satlength=535 Nr of Repeats=20  
RepeatLength=20 seed=TTATTGATTT Num.seqs=12 Similarity=0.816162  
34 CCTA-G-AAAAATCAATAA-TGT

\*\*\*\*\* \*\*\*\* \* \*\*

Consensus:

cAAAAATCaATAATTTCa

>WB235\_Fam\_33\_18\_9 Nr. of seq. 9 Alignment length(with gaps) = 19

Alignment score = 0.838207

WB235\_5:18881944-18883813 Satlength=1870 Nr of Repeats=74 RepeatLength=17

seed=ATTAGCAGCG Num.seqs=48 Similarity=0.873325

0 -ATTAGCAGCGCCCCAAA-

WB235\_5:18966918-18967045 Satlength=128 Nr of Repeats=5 RepeatLength=18

seed=GCAGCGCCCA Num.seqs=3 Similarity=0.950617

4 -ATTAGCAGCGCCCCAAA

Rev.of\_WB235\_5:18970132-18970454 Satlength=323 Nr of Repeats=18

RepeatLength=18 seed=TGCTAATTTT Num.seqs=16 Similarity=0.939506

7 -ATTAGCAGCGCCCCAAA

Rev.of\_WB235\_5:18979816-18980485 Satlength=670 Nr of Repeats=37

RepeatLength=18 seed=GCGCTGCTAA Num.seqs=25 Similarity=0.926420

11 -ATTAGCAGCGCCCCAAA

WB235\_5:18987130-18987201 Satlength=72 Nr of Repeats=4 RepeatLength=18

seed=TAGCAGCGCC Num.seqs=3 Similarity=0.901235

2 -ATTAGCAGCGCCCAAGAA

WB235\_5:18886295-18887294 Satlength=1000 Nr of Repeats=12 RepeatLength=18

seed=AATTAGCAGC Num.seqs=10 Similarity=0.960494

0 AATTAGCAGCGACCAAAA-

WB235\_5:19106243-19106368 Satlength=126 Nr of Repeats=6 RepeatLength=18

seed=ATTAGCAGCG Num.seqs=4 Similarity=1.000000

1 AATTAGCAGCGACCAAAA-

Rev.of\_WB235\_5:19193880-19195207 Satlength=1328 Nr of Repeats=74

RepeatLength=18 seed=GCTGCTAATT Num.seqs=61 Similarity=0.900627

10 AATTAGCAGCGACCAAAA-

WB235\_5:18964514-18964623 Satlength=110 Nr of Repeats=6 RepeatLength=18

seed=AGCAGCGCCC Num.seqs=5 Similarity=0.896296

3 -AATAGCAGCGCCCCAAA

\* \*\*\*\*\* \*\*\*\* \*

Consensus:

ATTAGCAGCGcCCAAAAa

>WB235\_Fam\_34\_12\_9 Nr. of seq. 9 Alignment length(with gaps) = 15

Alignment score = 0.680247

WB235\_6:2263547-2263756 Satlength=210 Nr of Repeats=16 RepeatLength=11

seed=CCATACCTAT Num.seqs=13 Similarity=1.000000

0 -CC-ATACCT-ATA-

WB235\_1:12620508-12620574 Satlength=67 Nr of Repeats=5 RepeatLength=12

seed=TACCTATACC Num.seqs=4 Similarity=0.944444

3 -CT-ATACCT-ATAC

WB235\_1:13689387-13689549 Satlength=163 Nr of Repeats=13 RepeatLength=12

seed=TATACCTATA Num.seqs=10 Similarity=0.955556

7 -CT-ATACCT-ATAC



Rev.of\_WB235\_1:13689822-13689960 Satlength=139 Nr of Repeats=11  
RepeatLength=12 seed=ATAGGTATAG Num.seqs=10 Similarity=0.955556  
4 -CT-ATACCT-ATAC  
Rev.of\_WB235\_2:3490327-3491001 Satlength=675 Nr of Repeats=54  
RepeatLength=12 seed=TAGGTATAGG Num.seqs=45 Similarity=0.881481  
3 -CT-ATACCT-ATAC  
WB235\_2:12353539-12353707 Satlength=169 Nr of Repeats=14 RepeatLength=12  
seed=CCTATACCTA Num.seqs=14 Similarity=0.968254  
5 -CT-ATACCT-ATAC  
WB235\_4:13222198-13222342 Satlength=145 Nr of Repeats=12 RepeatLength=12  
seed=TATACCTATA Num.seqs=12 Similarity=0.944444  
7 -CT-ATACCT-ATAC  
WB235\_2:3048248-3048472 Satlength=225 Nr of Repeats=15 RepeatLength=14  
seed=CTTATACCTT Num.seqs=14 Similarity=0.947671  
1 CCTTATACCTTATA-  
WB235\_3:1334409-1335297 Satlength=889 Nr of Repeats=40 RepeatLength=14  
seed=ATACCTAATA Num.seqs=28 Similarity=0.877047  
4 CCTAATACCTAATA-

\* \* \* \* \*

Consensus:

CTATACCTATAC

>WB235\_Fam\_35\_14\_9 Nr. of seq. 9 Alignment length(with gaps) = 14  
Alignment score = 0.904762  
WB235\_1:10291633-10291724 Satlength=92 Nr of Repeats=6 RepeatLength=14  
seed=GCTATACGCT Num.seqs=5 Similarity=1.000000  
0 GCTATACGCTATAC  
WB235\_2:1455578-1455634 Satlength=57 Nr of Repeats=4 RepeatLength=14  
seed=TACGCTATAC Num.seqs=4 Similarity=0.952381  
4 GCTATACGCTATAC  
WB235\_2:6185280-6186470 Satlength=1191 Nr of Repeats=85 RepeatLength=14  
seed=ACGCTATACG Num.seqs=85 Similarity=1.000000  
5 GCTATACGCTATAC  
Rev.of\_WB235\_4:14209637-14209721 Satlength=85 Nr of Repeats=6  
RepeatLength=14 seed=AGCGTATAGC Num.seqs=6 Similarity=1.000000  
3 GCTATACGCTATAC  
Rev.of\_WB235\_6:316974-317093 Satlength=120 Nr of Repeats=8  
RepeatLength=14 seed=ATAGCGTATA Num.seqs=7 Similarity=0.891156  
5 GCTATACGCTATAC  
WB235\_6:11440976-11441039 Satlength=64 Nr of Repeats=4 RepeatLength=14  
seed=CTATACGCTA Num.seqs=3 Similarity=0.936508  
1 GCTATACGCTATAC  
WB235\_5:12510458-12510577 Satlength=120 Nr of Repeats=8 RepeatLength=14  
seed=CTATACGCTA Num.seqs=7 Similarity=0.891156  
1 GCTATACGCTATGC  
Rev.of\_WB235\_6:16886473-16886932 Satlength=460 Nr of Repeats=20  
RepeatLength=14 seed=ATAGCGCATA Num.seqs=18 Similarity=0.808279  
5 GCTATGCGCTATGC  
WB235\_4:14208040-14209239 Satlength=1200 Nr of Repeats=70 RepeatLength=14  
seed=GCTATGCGCT Num.seqs=52 Similarity=0.786869  
0 GCTATGCGCTGTAC

\*\*\*\*\* \* \* \*

Consensus:

GCTATaCGCTATaC

>WB235\_Fam\_36\_12\_9 Nr. of seq. 9 Alignment length(with gaps) = 12  
Alignment score = 0.876543  
WB235\_1:765668-765992 Satlength=325 Nr of Repeats=27 RepeatLength=12  
seed=TCTAGGTCTA Num.seqs=27 Similarity=0.944286  
0 TCTAGGTCTAGG  
WB235\_1:991239-991341 Satlength=103 Nr of Repeats=8 RepeatLength=12  
seed=GGTCTAGGTC Num.seqs=7 Similarity=0.936508  
4 TCTAGGTCTAGG  
WB235\_1:11484951-11485029 Satlength=79 Nr of Repeats=6 RepeatLength=12  
seed=TAGGTCTAGG Num.seqs=5 Similarity=1.000000  
2 TCTAGGTCTAGG  
Rev.of\_WB235\_2:878150-878348 Satlength=199 Nr of Repeats=15  
RepeatLength=12 seed=ACCTAGACCT Num.seqs=12 Similarity=0.858586  
1 TCTAGGTCTAGG  
WB235\_1:942750-943044 Satlength=295 Nr of Repeats=24 RepeatLength=12  
seed=CTAAGTCTAA Num.seqs=23 Similarity=1.000000  
1 TCTAAGTCTAAG  
WB235\_1:942557-943381 Satlength=825 Nr of Repeats=46 RepeatLength=12  
seed=TAAGCCTAAG Num.seqs=40 Similarity=0.768310  
2 TCTAAGTCTAAG  
WB235\_1:3258597-3259299 Satlength=703 Nr of Repeats=58 RepeatLength=12  
seed=CTAAGTCTAA Num.seqs=57 Similarity=0.888053  
1 TCTAAGTCTAAG  
Rev.of\_WB235\_3:12196315-12196495 Satlength=181 Nr of Repeats=14  
RepeatLength=12 seed=CTTAGACTTA Num.seqs=12 Similarity=0.929293  
6 TCTAAGTCTAAG  
WB235\_5:15009961-15010009 Satlength=49 Nr of Repeats=4 RepeatLength=12  
seed=TCTAAGTCTA Num.seqs=4 Similarity=0.944444  
6 TCTAAGTCTAAG

\*\*\*\* \* \* \*

Consensus:

TCTAaGTCTAaG

>WB235\_Fam\_37\_21\_8 Nr. of seq. 8 Alignment length(with gaps) = 23  
Alignment score = 0.616977  
WB235\_2:463793-464368 Satlength=576 Nr of Repeats=9 RepeatLength=20  
seed=CAATTTTTGA Num.seqs=7 Similarity=0.942857  
17 TT-TTTGAGTTAAAAAT-T-CAA  
Rev.of\_WB235\_2:13318641-13320189 Satlength=1549 Nr of Repeats=49  
RepeatLength=20 seed=TTTGAATTTT Num.seqs=35 Similarity=0.825770  
21 AT-TTTGACTTAAAAAT-T-CAA  
Rev.of\_WB235\_3:1934627-1936118 Satlength=1492 Nr of Repeats=61  
RepeatLength=21 seed=TGGAAATTTT Num.seqs=49 Similarity=0.853795  
19 TT-TTTGGGTAAAAATT-TCCAA

WB235\_3:1560064-1560620 Satlength=557 Nr of Repeats=7 RepeatLength=21  
seed=CCTAAAAATT Num.seqs=5 Similarity=0.695238  
27 TT-TTNACCTAAAAAT-TNCAA  
WB235\_3:1536002-1536441 Satlength=440 Nr of Repeats=21 RepeatLength=20  
seed=TTTCACTAAA Num.seqs=20 Similarity=0.889265  
22 AA-TTTCAC-TAAAAATCT-CAA  
Rev.of\_WB235\_4:16425000-16425220 Satlength=221 Nr of Repeats=8  
RepeatLength=20 seed=TTTTAGTGAA Num.seqs=5 Similarity=1.000000  
33 AT-TTTCAC-TAAAAATCT-CAA  
WB235\_5:20494724-20495104 Satlength=381 Nr of Repeats=15 RepeatLength=20  
seed=TTTCACTAAA Num.seqs=11 Similarity=0.741991  
22 AT-TTTCAC-TAAAAATTT-CAA  
Rev.of\_WB235\_2:2897150-2899742 Satlength=2593 Nr of Repeats=100  
RepeatLength=21 seed=CCAAAAATTG Num.seqs=87 Similarity=0.735669  
26 TTTTGGAC-TAAAAATCT-CAA

\*\*\* \*\* \*\*\*\*\* \* \*

Consensus:

CAAaTTTgAcnTAAAAATnT

>WB235\_Fam\_38\_18\_8 Nr. of seq. 8 Alignment length(with gaps) = 19  
Alignment score = 0.681391  
WB235\_4:640232-640313 Satlength=82 Nr of Repeats=4 RepeatLength=15  
seed=TAAGCCTAAG Num.seqs=3 Similarity=1.000000  
0 TAAGCCTA-AGCC-CA-C-  
WB235\_5:1848647-1848932 Satlength=286 Nr of Repeats=14 RepeatLength=17  
seed=TAAGCCTAAG Num.seqs=9 Similarity=0.930283  
0 TAAGCCTA-AG-CTTAGCT  
Rev.of\_WB235\_3:635824-635934 Satlength=111 Nr of Repeats=6  
RepeatLength=18 seed=TAGGCTTAGG Num.seqs=4 Similarity=0.527778  
8 TAAGCCTACAG-CTAAGCC  
WB235\_2:368393-368601 Satlength=209 Nr of Repeats=10 RepeatLength=18  
seed=TAAGCCTAAG Num.seqs=6 Similarity=0.619753  
12 TAAGCCTA-AGTCTAAGCC  
WB235\_2:12942997-12943139 Satlength=143 Nr of Repeats=5 RepeatLength=18  
seed=CCTAAGCCTA Num.seqs=3 Similarity=0.660819  
16 TAAGCCTA-AGNCTAAACC  
WB235\_5:1047118-1047214 Satlength=97 Nr of Repeats=6 RepeatLength=18  
seed=AAGCCTAAGC Num.seqs=4 Similarity=0.691358  
19 TAAGCCTA-AGCCTAAACC  
WB235\_5:1661122-1661200 Satlength=79 Nr of Repeats=5 RepeatLength=18  
seed=GCCTAAGCCT Num.seqs=3 Similarity=0.614035  
21 TANGCCTA-AGCCTAAGCA  
Rev.of\_WB235\_2:3459359-3459467 Satlength=109 Nr of Repeats=5  
RepeatLength=18 seed=GGCTTAGGCT Num.seqs=3 Similarity=0.901235  
12 TAAGCCTA-AGCCTGAGCT

\*\* \*\*\*\*\* \*\* \* \* \*

Consensus:

TAAGCCTAAGcCTaAgCc

>WB235\_Fam\_39\_10\_8 Nr. of seq. 8 Alignment length(with gaps) = 11  
Alignment score = 0.758117  
WB235\_2:4207582-4207842 Satlength=261 Nr of Repeats=25 RepeatLength=10  
seed=GCGTTAGCAG Num.seqs=24 Similarity=0.977778  
0 GCGTTAGCAG-  
WB235\_5:842648-842948 Satlength=301 Nr of Repeats=24 RepeatLength=10  
seed=GGCGTCAGCG Num.seqs=18 Similarity=0.893682  
9 GCGTCAGCGG-  
WB235\_5:1850026-1850346 Satlength=321 Nr of Repeats=23 RepeatLength=10  
seed=GGGCGTCAGC Num.seqs=15 Similarity=0.949206  
18 GCGTCAGCGG-  
Rev.of\_WB235\_2:13790809-13791073 Satlength=265 Nr of Repeats=22  
RepeatLength=10 seed=CCGCTACCGC Num.seqs=18 Similarity=1.000000  
0 GCGGTAGCGG-  
Rev.of\_WB235\_3:13032223-13032864 Satlength=642 Nr of Repeats=39  
RepeatLength=10 seed=TACCGCCCGC Num.seqs=24 Similarity=0.944444  
6 GCGGTAGCGG-  
Rev.of\_WB235\_5:2777566-2778653 Satlength=1088 Nr of Repeats=65  
RepeatLength=10 seed=TACCGCCCGC Num.seqs=59 Similarity=0.973972  
6 GCGGTAGCGG-  
WB235\_5:3145392-3145472 Satlength=81 Nr of Repeats=6 RepeatLength=10  
seed=GCGGGCGGTA Num.seqs=4 Similarity=0.933333  
6 GCGGTAGCGG-  
Rev.of\_WB235\_2:13795316-13795382 Satlength=67 Nr of Repeats=5  
RepeatLength=11 seed=CCGCTACCGC Num.seqs=4 Similarity=0.919192  
0 GCGGTAGCGGT

\*\*\* \*\* \*

Consensus:

GCGgtAGCGG

>WB235\_Fam\_40\_166\_7 Nr. of seq. 7 Alignment length(with gaps) = 173  
Alignment score = 0.741077  
WB235\_6:15929033-15929676 Satlength=644 Nr of Repeats=4 RepeatLength=158  
seed=TATCAATTTT Num.seqs=3 Similarity=0.924051  
0 TATCAATTTTCAGACGCGCTACGGGGTTTTTGTCTTGAATTCCAATTTCAAC-----  
AGGCGCAAAAAACAAAAATAAAATTTTTGGATT-TTTGGAAAAGT-TTTT-  
ATAGATTTCTATTCTAGATTGTTTAA-AAATATTATTGGTACGTTTTTGTACCAANA  
WB235\_6:15929110-15929778 Satlength=669 Nr of Repeats=4 RepeatLength=158  
seed=CAAAAATAAA Num.seqs=3 Similarity=0.935302  
66 TATCAATTTTCAGACGCGCTACGGGGTTTTTGTCTTGAATTCCAATTTCAAC-----  
AGGCGCAAAAAACAAAAATAAAATTTTTGGATT-TTTGGAAAAGT-TTTT-  
ATAGATTTGTATTCTAGATTGTTTAA-AAATATTATTGGTACGTTTTTGTACCAANA  
Rev.of\_WB235\_3:2077634-2082512 Satlength=4879 Nr of Repeats=29  
RepeatLength=168 seed=TTTATTTTTG Num.seqs=28 Similarity=0.979634  
86 TATCCATTTTCAGACGCGCTACAGGGGTTTTTGTCTTGAATTCCAATTTCAACAGGTA-  
TATGTAGGCACAAAAACAAAAATAAACATTTTGGAAAT-TCTGGA-AA-  
TGTTTTGATAGATTTGGATTCTAGATTGTTTAA-AAATATTATTGGTAAGTTTTTGTACCTAGA  
WB235\_4:15225095-15227378 Satlength=2284 Nr of Repeats=12  
RepeatLength=168 seed=AAAAACAAAA Num.seqs=9 Similarity=0.953704  
239 TATCAATTTTCAGATGCGCTAGAGGGTTTTTGTCTTGAATTCCAATTTCAACAGATA-  
TATACAGGCACAAAAACAAAAATAAAATTTTGGAAATGTTGGGAGAA-T-TTTT-  
ATAGATTTGGATTCTAGATT-TTAAACAAATATTTTTGGTAAGTTTCTGGACCTAGA

WB235\_4:15225869-15227795 Satlength=1927 Nr of Repeats=11  
RepeatLength=168 seed=AACAAAAATA Num.seqs=9 Similarity=0.953704  
242 TATCAATTTTCAGATGCGCTAGAGGGGTTTTGTCTTGAATTCCAATTTCAACAGATA-  
TATACAGGCACAAAAAACAAAAATAAAATTTTGGGAATGTTGGGAGAA-T-TTTT-  
ATAGATTTGGATTCTAGATT-TTTAACAAATATTTTTGGTAAGTTTCTGGACCTAGA  
Rev.of\_WB235\_4:12931758-12932786 Satlength=1029 Nr of Repeats=5  
RepeatLength=168 seed=TTTTTAAAAA Num.seqs=3 Similarity=0.984127  
141 AAGTAAATTTAAGCCGCGCTAGAGAGGTTTTGTGTGCGAGTTCCAATTTTCACAGGTACTA-  
GTAGGCTCAAAAAACAAAAATAAAATTATCGAAT-TCCGGA-AA-  
TGTTTTGATAGATTTGGATTCTAGATTTTTTAA-AAATATTATTGGTAAGTTTGTGGGCCAGGA  
WB235\_4:15511605-15513283 Satlength=1679 Nr of Repeats=10  
RepeatLength=168 seed=GAATTCGGGA Num.seqs=8 Similarity=0.944161  
261 AAGTAACTTAAAGCCGCGCTAGGAAGGTTTTGTGTGCGAGTTACAATTTTCACAGGTACTA-  
GTAGGCGCAAAAAACAAAAATAAAATTATGGAAT-TCCGGA-AA-  
TGTTTTGATAGATTTGGATTCTAGATTTTTTAA-AAATATTATAGGTGAGTTTTTTGGGACAGGA

Consensus:

>WB235\_Fam\_41\_95\_7 Nr. of seq. 7 Alignment length(with gaps) = 96  
Alignment score = 0.868386

0 AGGGCCGCAGGCCCGAATAGTCTTGGAACCT--GGGCTGGCTATAATCCTATTCCAAGCAGGT-  
TGTTATTCACTCAAGCCTATCAACCAAGTTTG

RepeatLength=95 seed=TTCTGGGCCTG Num.seqs=6 Similarity=0.981287

WB235\_3:3385070-3386871 Satlength=1802 Nr of Repeats=19 RepeatLength=95  
seed=TAATCTATT Num.segs=13 Similarity=0.948178

Rev.of WB235 2:13385641-13386400 Satlength=760 Nr of Repeats=8

108 AGGGCCGCAGGCCCCGAATACTCATGGAAACTAAGGGCCAGCTTTAATCCTATTCCAAGCAGAT-  
TGTTATTTCGCTCAAGCCTACCAACCAGGTTTG

RepeatLength=96 seed=GGCCTGCGGC Num.seqs=6 Similarity=0.968518

WB235\_3:1119657-1120064 Satlength=408 Nr of Repeats=4 RepeatLength=96  
seed=GAGGGCCGCA Num.segs=3 Similarity=0.949074

Rev.of\_WB235\_5:5415371-5416162 Satlength=792 Nr of Repeats=8  
RepeatLength=96 seed=TCTGCTTAGA Num.seqs=7 Similarity=0.949735  
254  
AGGGCCGCAGGCCCCGAACACTCTTGAAACTATGGGCTGGCTTTGATCCTATTCTAAGCAGATATGTTATTCA  
CTCAAGCCTAATAACCAGGTTTG

\*\*\*\*\* \* \*\* \*\*\*\*\* \*\*\*\*\* \*\*\* \* \*\*\*\*\* \*\*\*\*\* \* \*\*\*\*\*  
\*\*\*\*\* \*\*\*\*\* \*\* \*

Consensus:

AGGGCCGCAGGCCCCGAAtACTCtTGAAACTatGGGctgGCTTTaATCCTATTCCaAGCAGATTGTTATTCaC  
TCAAGCCTAnnAACCAGGTTtG

>WB235\_Fam\_42\_94\_7 Nr. of seq. 7 Alignment length(with gaps) = 94  
Alignment score = 0.948666  
WB235\_1:4281487-4294537 Satlength=13051 Nr of Repeats=139 RepeatLength=94  
seed=TCAAAATCTT Num.seqs=123 Similarity=0.961982  
0

TCAAAATCTTCTGTTCTCTAAATATTGGGTGCTTTTCGATGCCCTATGTAGACAAATCAATGGGAAAATCATC  
AATTCTGAAGGCAGTAATTC

Rev.of\_WB235\_3:7405401-7443206 Satlength=37806 Nr of Repeats=414  
RepeatLength=94 seed=CAATATTTAG Num.seqs=380 Similarity=0.958602  
27

TCAAAATCTTCTGTTCTCTAAATATTGGGTGCTTTTCGATGCCCTATGTAGACAAATCAATGGGAAAATCATC  
AATTCTGGAGGCAGTAATTC

Rev.of\_WB235\_3:7448277-7452238 Satlength=3962 Nr of Repeats=40  
RepeatLength=94 seed=ACCCAATATT Num.seqs=39 Similarity=0.958308  
30

TCAAAATCTTCTGTTCTCTAAATATTGGGTGCTTTTCGATGCCCTATGTAGACAAATCAATGGGAAAATCATC  
AATTCTGGAGGCAGTAATTC

WB235\_1:10913365-10914502 Satlength=1138 Nr of Repeats=5 RepeatLength=94  
seed=TGTAGACAAA Num.seqs=4 Similarity=0.971631  
46

TCAAAATCTTCTGTTCTCTAAATATTGGGTGCTTTTCGATGTCCTTTGTAGACAAATCAATGGGAGAATCATC  
AATTCTGAAGGCAGTAATTC

Rev.of\_WB235\_4:1543828-1544203 Satlength=376 Nr of Repeats=4  
RepeatLength=94 seed=TCCCATTGAT Num.seqs=3 Similarity=0.924350  
65

TCAAAATCTTCTGTTCTCTAAATATTGGGTGCTTTTCGATGCCCTTTGTAGACAAATCAATGGGAAAATTGTC  
CATTTCTGAAGGCAGTAATTC

WB235\_6:311553-312211 Satlength=659 Nr of Repeats=7 RepeatLength=94  
seed=GCAGTAATTC Num.seqs=7 Similarity=0.944613  
84

TCAAAATCTTCTGTTCTCTAAATATTGGGTGCTTTTCGATGCCCTTTGTAGACAAATCAATGAGAAAATTGTC  
AATTCTGAAGGCAGTAATTC

Rev.of\_WB235\_6:6826365-6830125 Satlength=3761 Nr of Repeats=40  
RepeatLength=94 seed=TGCCTTCAGA Num.seqs=40 Similarity=0.978523  
87

TCAAAATCTTCTGTTCTCTAAATATTGAGTGCTTTTCGATGCCCTATGTAGACAAATCAATGGGAAAATTGTC  
AATTCTGAAGGCAGTAATTC

\*\*\*\*\* \*\*\*\*\* \*\*\* \*\*\*\*\* \*\* \*\*\* \*\*  
\*\*\*\*\* \*\*\*\*\*

Consensus:

TCAAAAATCTTCTGTTCTCTAAATATTGGGTGCTTTTCGATGCCCTaTGTAGACAAATCAATGGGAAAAATcaTC  
AATTTCTGaAGGCAGTAATTC

>WB235\_Fam\_43\_19\_7 Nr. of seq. 7 Alignment length(with gaps) = 23  
Alignment score = 0.690821  
WB235\_3:9863897-9863967 Satlength=71 Nr of Repeats=4 RepeatLength=19  
seed=TGGTTGAGGC Num.seqs=3 Similarity=0.906433  
0 -TGGTTGAGG--CTCTAG-ATTT  
Rev.of\_WB235\_4:180606-180739 Satlength=134 Nr of Repeats=7  
RepeatLength=19 seed=CCTCAACCAA Num.seqs=7 Similarity=0.826232  
9 -TGGTTGAGG--CTCTNG-ATTT  
WB235\_4:119859-120107 Satlength=249 Nr of Repeats=13 RepeatLength=19  
seed=TGGTTGAGGC Num.seqs=12 Similarity=0.868155  
0 -TGGTTGAGG--CTCTCT-ATTT  
WB235\_3:9869882-9869977 Satlength=96 Nr of Repeats=5 RepeatLength=19  
seed=ATTTTGGTTG Num.seqs=5 Similarity=0.818333  
15 -TGGTTGAGG--CTCAGG-ATTT  
Rev.of\_WB235\_4:195511-196615 Satlength=1105 Nr of Repeats=53  
RepeatLength=20 seed=CTCAACCAAA Num.seqs=32 Similarity=0.882930  
27 -TGGTTGAGG--CTCAGGATTTT  
WB235\_4:124390-125403 Satlength=1014 Nr of Repeats=21 RepeatLength=22  
seed=TTGGTTGAGG Num.seqs=16 Similarity=0.915152  
0 TTGGTTGAGGCTCTCTGG-ATTT  
WB235\_4:236164-236448 Satlength=285 Nr of Repeats=12 RepeatLength=22  
seed=TGAGGCTCTC Num.seqs=11 Similarity=0.886501  
5 TTGGTTGAGGCTCTCTGG-ATTT

\*\*\*\*\* \*\*\*

Consensus:

TGGTTGAGGCTCtgATTT

>WB235\_Fam\_44\_226\_6 Nr. of seq. 6 Alignment length(with gaps) = 227  
Alignment score = 0.831816  
WB235\_5:9428459-9435308 Satlength=6850 Nr of Repeats=32 RepeatLength=214  
seed=GTAACGCTC Num.seqs=31 Similarity=0.958289  
0  
GTAACGCTCAAAGCTTCTGGCACCTATTGGGATGTTGTTGGTAAATTCTGAAAAAGCTTGAATTTGCAACA  
AAGTTTCTGAAAGAAATTTTC-  
AAAAAAGTTGATTTGAAGTGATTTGGGAATTTTCAAAGTTTCATAAATTTACCTA-  
TTTTGCCTATAAATGGTCGTTTTTCATTTAATAATAAAATACGCAC--AAAGGTA---CTG--TAGGT----  
TTTCT  
Rev.of\_WB235\_1:4280022-4281181 Satlength=1160 Nr of Repeats=6  
RepeatLength=226 seed=ACAAGAAGCT Num.seqs=5 Similarity=0.915789  
22  
GTAAC TACGTGAAGCTTCTTGTACCTACTGGAATATTGTTAATATATTCTAAAAGAGCTTAAAATTTACTACA  
AAGTTTCTGAAAGACATTTTCGCAAAAAAATTACTTTGAAGAGATTTATGAATTTTCAAATTACGAAAATCCC  
TCTA-  
TTTTGCCTATAAGTGGTAGTTTTTCATTAAATAATAAAATACGCACTAAAAGGTAGGGCTGAAAATGTACTATT  
TCT  
WB235\_5:6072983-6091328 Satlength=18346 Nr of Repeats=79 RepeatLength=226  
seed=CTTTGAAGAG Num.seqs=52 Similarity=0.955813  
104

GTAAC TACGTGAAGCTTCTTGTACCTACTGAAATATTGTTAATATATTCTGAAAGAGCTTAAAATTTACTACA  
AAGTTTCTGAAAGACATTTTC-

AAAAAAAAATTACTTTGAAGAGATTTATGAATTTTCAAAGTTTGAAAAATCCACCTATTTTTGCCTATTAATGG  
TAGTTTTCATTAATAATAAAAATACGCACTAAAAGGTAGGGCTGAAAATGTACTATTTCT

WB235\_6:11888285-11889641 Satlength=1357 Nr of Repeats=6 RepeatLength=226  
seed=TGTACTATTT Num.seqs=6 Similarity=0.964602  
214

GTAAC TACGTGAAGCTTCTTGTACCTACTGAAATATTGTTGGTATATTCTAAAAGAGCTTAAAATTTACTACA  
AAGTTTCTAAAAGACATTTTC-

AAAAAAGTTACTTTGAAGAGATTTATGAATTTTCAAAGTTACGAAAATTCGTCTATTTTTGCCTATAAATGG  
TAGTTTTCATTAATAATAAAAATACGCATTATAAGGTAGGGCTGAAAATGTACTATTTCT

WB235\_6:5045129-5051107 Satlength=5979 Nr of Repeats=23 RepeatLength=226  
seed=GAAAATTCAT Num.seqs=17 Similarity=0.593389  
136

GTAAC TACGTGAAGCTTCTTGTACCTACTGAAATATTGTTAATATATTCAGAAAGANCTTAAAANTTACTACG  
AAGTTTCTGAAAGACATTTTC-

TAAAAAAGTTACTTTGAAGAGATTTATGAATTTTCAAANTTTNGAAAATTCATCTATTTTTGTCTATAAATGG  
TAGTTTTCATTTAATAATAAAAATACGCACTAAAAGGTAGGGCTGAAAATGAACTATTTCT

Rev.of\_WB235\_6:5045783-5053744 Satlength=7962 Nr of Repeats=32  
RepeatLength=226 seed=ATGAATTTTC Num.seqs=26 Similarity=0.592515  
146

GTAAC TACGTGAAGCTTCTTGTACCTACTGAAATATTGTTAATATATTCAGAAAGANCTTAAAATTTACTACG  
AAGTTTCTGAAAGACATTTTC-

TAAAAAAGTTACTTTGAAGAGATTTATGAATTTTCAAANTTTNGAAAATTCATCTATTTTTGTTTATAAATGG  
TAGTTTTCATTTAATAATAAAAATACNCACTAAAAGGTAGGGCTGAAAATGTACTATTTCT

\*\*\*\*\* \* \*\*\*\*\* \* \*\*\*\*\* \*\* \*\* \*\*\*\*\* \*\* \*\*\*\*\* \*\*\* \* \*\*\* \*\* \* \* \*  
\*\*\*\*\* \*\*\*\*\* \*\*\*\*\* \*\*\*\*\* \*\* \*\*\*\*\* \*\*\*\*\* \*\*\*\*\* \*\*\*\*\* \*\* \*\*\*\*\*  
\*\*\* \*\*\*\*\* \*\*\* \* \*\*\*\*\* \*\*\*\*\* \* \*\*\*\*\* \*\*\*\*\* \*\*\*\*\* \*\*\*\*\* \*\*\* \* \*  
\*\*\*\*\*

Consensus :

GTAAC TACGTGAAGCTTCTTGTACCTACTGaaATATTGTTaaTATATTCTgAAAGAgCTTAAAATTTACTACa  
AAGTTTCTGAAAGACATTTTcaAAAAAAGTTACTTTGAAGAGATTTATGAATTTTCAAAGTTTcgAAAATtCat  
CTatTTTGTcCTATAAATGGTAGTTTTCATTaATAATAAAAATACGCACtAAAAGGTAGGGCTGAAAATGTAC  
TATTTCT

>WB235\_Fam\_45\_33\_6 Nr. of seq. 6 Alignment length(with gaps) = 33  
Alignment score = 0.649832

WB235\_1:12612870-12613263 Satlength=394 Nr of Repeats=5 RepeatLength=32  
seed=GCTGATTGGT Num.seqs=3 Similarity=0.861111

0 GCTGATTGGTTCA-AAAGTGGGCGTGGCTAATC

Rev.of\_WB235\_3:12740278-12740831 Satlength=554 Nr of Repeats=5  
RepeatLength=32 seed=ACCAATCAGC Num.seqs=3 Similarity=0.916667

10 GCTGATTGGTTCA-AAAGTGGGCGGAGCAAATC

Rev.of\_WB235\_3:12696947-12698148 Satlength=1202 Nr of Repeats=5  
RepeatLength=32 seed=GACCAATCAG Num.seqs=3 Similarity=0.861111

11 GCTGATTGG-TCAGAGAGTGGGCGGGGCGAATC

Rev.of\_WB235\_2:14274983-14275913 Satlength=931 Nr of Repeats=26  
RepeatLength=32 seed=AACCAATCAG Num.seqs=18 Similarity=0.796296

11 GCTGATTGGTTCC-AAAATGGGTGGAGCTGAGC

WB235\_5:16583907-16584035 Satlength=129 Nr of Repeats=4 RepeatLength=32  
seed=GCTGATTGGT Num.seqs=4 Similarity=0.508488

0 GCTGATTGG-TAAGAACTGGGCGTGGCTGAAA



Rev.of\_WB235\_3:2218366-2219198 Satlength=833 Nr of Repeats=23  
RepeatLength=32 seed=CTCAGCCAAT Num.seqs=17 Similarity=0.871936  
14 GTTGATTGGCTGAGAAA-TAGGCGGAGCTAAAC

\* \* \* \* \*

Consensus:

GCTGATTGGtTcAgAAAgTGGGCGgaGctaAtC

>WB235\_Fam\_46\_32\_6 Nr. of seq. 6 Alignment length(with gaps) = 32  
Alignment score = 0.838889  
WB235\_2:851256-851616 Satlength=361 Nr of Repeats=5 RepeatLength=31  
seed=TGTCTAGCGA Num.seqs=3 Similarity=0.799283  
0 TGTCTAGCGAGACCTCAGAAG-AGAGCTGAGT  
WB235\_2:1970474-1970784 Satlength=311 Nr of Repeats=10 RepeatLength=31  
seed=AGAGCTGAGT Num.seqs=10 Similarity=0.801505  
22 TGTCTAGCGAGACAGCAGAAGAAGAGCTGAGT  
WB235\_2:2593754-2594002 Satlength=249 Nr of Repeats=8 RepeatLength=31  
seed=AGAGCTGAGT Num.seqs=8 Similarity=0.806548  
22 TGTCTAGCGAGACAGCAGAAGAAGAGCTGAGT  
WB235\_2:1962052-1963013 Satlength=962 Nr of Repeats=31 RepeatLength=31  
seed=AGAGCTGAGT Num.seqs=31 Similarity=0.809341  
21 TGTCTAGCGAGATAGCAGAN-AAGAGCTGAGT  
WB235\_2:1977769-1979195 Satlength=1427 Nr of Repeats=46 RepeatLength=31  
seed=AGAGCTGAGT Num.seqs=46 Similarity=0.811262  
21 TGTCTAGCGAGATAGCAGAN-AAGAGCTGAGT  
Rev.of\_WB235\_2:2008283-2009461 Satlength=1179 Nr of Repeats=38  
RepeatLength=31 seed=GACAACTCAG Num.seqs=38 Similarity=0.826733  
35 TGTCTAGCGAGATAGCAGAA-AAGAGCTGAGT

\*\*\*\* \* \* \* \* \*

Consensus:

TGTCgAGCGAGAcAGCAGAagAAGAGCTGAGT

>WB235\_Fam\_47\_21\_6 Nr. of seq. 6 Alignment length(with gaps) = 25  
Alignment score = 0.624889  
WB235\_3:2235593-2235697 Satlength=105 Nr of Repeats=5 RepeatLength=21  
seed=CTGACCAAAT Num.seqs=4 Similarity=0.841270  
0 CTGACC---AAATTTGT-TTCAGCA  
Rev.of\_WB235\_3:2245221-2245452 Satlength=232 Nr of Repeats=9  
RepeatLength=21 seed=GTCAGTGCTG Num.seqs=6 Similarity=0.856085  
5 CTGACA---AAATTTGT-TCCAGCA  
WB235\_3:3272813-3272897 Satlength=85 Nr of Repeats=4 RepeatLength=21  
seed=TCCAGCACTG Num.seqs=4 Similarity=0.936508  
14 CTGACA---AAATTTGT-TCCAGCA  
Rev.of\_WB235\_6:723810-724054 Satlength=245 Nr of Repeats=5  
RepeatLength=22 seed=TGGTCAGTGC Num.seqs=4 Similarity=0.777778  
7 CTGACC---AAATTGGTCGCCAGCA  
Rev.of\_WB235\_6:988793-988877 Satlength=85 Nr of Repeats=4 RepeatLength=21  
seed=TGGTCAGTGC Num.seqs=4 Similarity=0.968254  
7 CTGACC---AAATTGTT-TCTTGCA

WB235\_6:1524262-1524376 Satlength=115 Nr of Repeats=5 RepeatLength=23  
seed=AAAAAATTTG Num.seqs=4 Similarity=0.971014  
6 CTGACCAAAAAATTTGT-TTC-GCA

\*\*\*\*\* \* \*\*\*

Consensus:

CTGACcAAATTTtGTTcCaGCA

>WB235\_Fam\_48\_21\_6 Nr. of seq. 6 Alignment length(with gaps) = 22  
Alignment score = 0.621212  
WB235\_6:1008023-1008695 Satlength=673 Nr of Repeats=4 RepeatLength=21  
seed=TGACAAAACA Num.seqs=3 Similarity=1.000000  
0 TGACAAAA-CATAACTTTGCAC  
Rev.of\_WB235\_6:11745151-11745371 Satlength=221 Nr of Repeats=10  
RepeatLength=22 seed=TCAGTGCAA Num.seqs=8 Similarity=0.818182  
3 TGACAAAAGTGTCACCTTTGCAC  
Rev.of\_WB235\_6:1062534-1062618 Satlength=85 Nr of Repeats=4  
RepeatLength=21 seed=GTCAGTGCAA Num.seqs=4 Similarity=0.841270  
4 TGACAATA-TTTGAATTTGCAC  
WB235\_6:1320585-1320992 Satlength=408 Nr of Repeats=5 RepeatLength=21  
seed=TTGCACTGAC Num.seqs=3 Similarity=0.747475  
15 TGACAAAA-TTTCGTNTTGCAC  
Rev.of\_WB235\_6:1214446-1215096 Satlength=651 Nr of Repeats=6  
RepeatLength=21 seed=GTCAGTGCAA Num.seqs=4 Similarity=0.809524  
4 TGACCAAA-AATGCATTTGCAC  
WB235\_6:1325710-1325901 Satlength=192 Nr of Repeats=7 RepeatLength=21  
seed=TTGCACTGAC Num.seqs=6 Similarity=0.630303  
15 TGACCAAC-TCTTCATTTGCAC

\*\*\*\* \* \* \*\*\*\*\*

Consensus:

TGACaAAAtnThaaTTTGCAC

>WB235\_Fam\_49\_19\_6 Nr. of seq. 6 Alignment length(with gaps) = 21  
Alignment score = 0.706878  
WB235\_1:11486089-11486222 Satlength=134 Nr of Repeats=7 RepeatLength=19  
seed=TTATCGATTT Num.seqs=5 Similarity=0.873684  
46 TCNA--GAAATTATCGATTTT  
Rev.of\_WB235\_3:2836362-2837893 Satlength=1532 Nr of Repeats=45  
RepeatLength=19 seed=AAAATCGATA Num.seqs=33 Similarity=0.907895  
57 TCCG--GAAATTATCGATTTT  
Rev.of\_WB235\_3:1805381-1807736 Satlength=2356 Nr of Repeats=56  
RepeatLength=19 seed=AAAATCGATA Num.seqs=36 Similarity=0.647665  
57 CCGA--TAAATTATCGATTTT  
Rev.of\_WB235\_3:1892229-1893089 Satlength=861 Nr of Repeats=44  
RepeatLength=19 seed=AAAATCGATA Num.seqs=39 Similarity=0.805668  
57 CCGA--GNAATTATCGATTTT  
WB235\_3:2012861-2014349 Satlength=1489 Nr of Repeats=36 RepeatLength=19  
seed=TATCGATTTT Num.seqs=22 Similarity=0.729931  
47 TCGT--AAAATTATCGATTTT

WB235\_5:18940941-18941109 Satlength=169 Nr of Repeats=8 RepeatLength=21  
seed=ATTATTGATT Num.seqs=8 Similarity=0.778409  
23 GAAAAATTATTGATTTTCAA

\* \* \* \*

Consensus:

gaAATTATCGATTTTtCga

>WB235\_Fam\_50\_18\_6 Nr. of seq. 6 Alignment length(with gaps) = 19  
Alignment score = 0.644444  
WB235\_1:6089071-6089158 Satlength=88 Nr of Repeats=5 RepeatLength=17  
seed=AGGTAGTCAA Num.seqs=3 Similarity=1.000000  
0 AGGTAGTCAATGAGCA-A-  
Rev.of\_WB235\_4:7683397-7683518 Satlength=122 Nr of Repeats=6  
RepeatLength=17 seed=CTCATTGCCT Num.seqs=4 Similarity=0.764706  
14 GGTAGTCAATGAGCA-C-  
WB235\_5:8314150-8315036 Satlength=887 Nr of Repeats=51 RepeatLength=17  
seed=TAGTCAATGA Num.seqs=33 Similarity=0.909685  
3 AGGTAGTCAATGATCT-A-  
WB235\_4:8999493-8999648 Satlength=156 Nr of Repeats=8 RepeatLength=17  
seed=AGGCAATGAG Num.seqs=5 Similarity=0.781482  
3 -AGTAGGCAATGAGAA-AG  
Rev.of\_WB235\_5:6910515-6910653 Satlength=139 Nr of Repeats=7  
RepeatLength=17 seed=CTCATTGCCT Num.seqs=5 Similarity=0.703704  
13 -NGTAGGCAATGAGCA-AG  
Rev.of\_WB235\_5:7703008-7703129 Satlength=122 Nr of Repeats=6  
RepeatLength=17 seed=CTCATTGCCT Num.seqs=4 Similarity=0.697531  
13 -NGTAGGCAATGAGCACAG

\*\*\*\* \*\*\*\*\*

Consensus:

ngGTAGgCAATGAGCAAg

>WB235\_Fam\_51\_16\_6 Nr. of seq. 6 Alignment length(with gaps) = 16  
Alignment score = 0.697917  
WB235\_2:875486-875668 Satlength=183 Nr of Repeats=12 RepeatLength=14  
seed=TAGGATCTAG Num.seqs=10 Similarity=0.807407  
2 TC-TAGGATCT-AGGA  
Rev.of\_WB235\_2:1605126-1605357 Satlength=232 Nr of Repeats=13  
RepeatLength=14 seed=GATCCTAGAT Num.seqs=10 Similarity=0.832804  
2 TC-TAGGATCT-AGGA  
WB235\_1:14002210-14002386 Satlength=177 Nr of Repeats=11 RepeatLength=16  
seed=ATCTAAGGAT Num.seqs=11 Similarity=0.872727  
6 TCTAAGGATCTAAGGA  
Rev.of\_WB235\_1:14005076-14005524 Satlength=449 Nr of Repeats=13  
RepeatLength=16 seed=AGATCCTTAG Num.seqs=10 Similarity=0.811111  
10 TCTAAGGATCTAAGGA  
WB235\_1:14006294-14006390 Satlength=97 Nr of Repeats=6 RepeatLength=16  
seed=AGGATCTAAG Num.seqs=6 Similarity=0.972222  
11 TCTAAGGATCTAAGGA

WB235\_4:15636148-15636960 Satlength=813 Nr of Repeats=51 RepeatLength=14  
seed=GGACTAGGGA Num.seqs=48 Similarity=0.885234  
3 TAGGGACTAGGGA-C-

\* \*

Consensus:

TCtaAGGATCTaAGGA

>WB235\_Fam\_52\_15\_6 Nr. of seq. 6 Alignment length(with gaps) = 15  
Alignment score = 0.952593  
WB235\_1:14290714-14290861 Satlength=148 Nr of Repeats=8 RepeatLength=15  
seed=GGGGGCAACA Num.seqs=5 Similarity=0.822222  
0 GGGGGCAACAAAATA  
Rev.of\_WB235\_1:14292866-14293013 Satlength=148 Nr of Repeats=8  
RepeatLength=15 seed=TGTTGCCCCC Num.seqs=5 Similarity=0.822222  
10 GGGGGCAACAAAATA  
Rev.of\_WB235\_3:705083-705230 Satlength=148 Nr of Repeats=8  
RepeatLength=15 seed=TGTTGCCCCC Num.seqs=5 Similarity=0.795556  
10 GGGGGCAACAAAATA  
WB235\_6:17344107-17344254 Satlength=148 Nr of Repeats=8 RepeatLength=15  
seed=GGGGGCAACA Num.seqs=5 Similarity=0.822222  
0 GGGGGCAACAAAATA  
WB235\_2:1487465-1487813 Satlength=349 Nr of Repeats=19 RepeatLength=15  
seed=GGGGGCAACA Num.seqs=12 Similarity=0.807407  
0 GGGGGCAACAAAAA  
WB235\_3:700450-700543 Satlength=94 Nr of Repeats=5 RepeatLength=15  
seed=GGGGGCAACA Num.seqs=3 Similarity=0.822222  
0 GGGGGCAACAAAAA

\*\*\*\*\* \*

Consensus:

GGGGGCAACAAAAtA

>WB235\_Fam\_53\_12\_6 Nr. of seq. 6 Alignment length(with gaps) = 14  
Alignment score = 0.649206  
WB235\_1:4548525-4548705 Satlength=181 Nr of Repeats=14 RepeatLength=12  
seed=TTTTTATTTT Num.seqs=12 Similarity=0.947811  
0 TTTTTATTT-TTA-  
Rev.of\_WB235\_2:11122559-11122763 Satlength=205 Nr of Repeats=16  
RepeatLength=12 seed=AATAAAAATA Num.seqs=14 Similarity=1.000000  
2 TTTTTATTT-TTA-  
Rev.of\_WB235\_3:3334092-3334302 Satlength=211 Nr of Repeats=17  
RepeatLength=12 seed=AAAATAAAAA Num.seqs=16 Similarity=0.986111  
4 TTTTTATTT-TTA-  
WB235\_5:6944029-6944530 Satlength=502 Nr of Repeats=36 RepeatLength=12  
seed=TTTAATTTTA Num.seqs=31 Similarity=1.000000  
1 TTTTAATTT-TAA-  
WB235\_4:6291557-6291611 Satlength=55 Nr of Repeats=4 RepeatLength=13  
seed=TTTCATTTGT Num.seqs=3 Similarity=0.931624  
1 TTTTCATTT-GTAA

Rev.of\_WB235\_6:2010907-2011305 Satlength=399 Nr of Repeats=28  
RepeatLength=12 seed=AATAAATAAC Num.seqs=17 Similarity=1.000000  
0 TATTTATTTATT--

\* \*\* \*\*\*\*  
Consensus:

TTTTtATTTTA

>WB235\_Fam\_54\_11\_6 Nr. of seq. 6 Alignment length(with gaps) = 11  
Alignment score = 0.838384  
WB235\_2:4309186-4309439 Satlength=254 Nr of Repeats=23 RepeatLength=11  
seed=CAGTTGTCAC Num.seqs=19 Similarity=0.897927  
0 CAGTTGTCAC  
WB235\_6:3631392-3631893 Satlength=502 Nr of Repeats=43 RepeatLength=11  
seed=CAGTTGTCAC Num.seqs=40 Similarity=0.871173  
0 CAGTTGTCACC  
Rev.of\_WB235\_4:4599072-4599116 Satlength=45 Nr of Repeats=4  
RepeatLength=11 seed=TGACAACTTT Num.seqs=4 Similarity=1.000000  
9 AAGTTGTCACA  
Rev.of\_WB235\_4:7128107-7129879 Satlength=1773 Nr of Repeats=156  
RepeatLength=11 seed=TGACAACTTC Num.seqs=113 Similarity=0.796811  
9 AAGTTGTCACG  
WB235\_5:4773346-4773621 Satlength=276 Nr of Repeats=22 RepeatLength=11  
seed=CACGAAGTTG Num.seqs=19 Similarity=0.914939  
18 AAGTTGTCACG  
WB235\_6:11789572-11789748 Satlength=177 Nr of Repeats=16 RepeatLength=11  
seed=CGAAGTTGTC Num.seqs=16 Similarity=0.870707  
9 AAGTTGTCACG

\*\*\*\*\*  
Consensus:

aAGTTGTCACg

>WB235\_Fam\_55\_48\_5 Nr. of seq. 5 Alignment length(with gaps) = 48  
Alignment score = 0.900000  
WB235\_4:5465022-5467133 Satlength=2112 Nr of Repeats=44 RepeatLength=48  
seed=AATTC AATTT Num.seqs=43 Similarity=0.962532  
0 AATTC AATTTTTGATTTGCCGTAATTTATATTTTCTGAAGATGAGC  
Rev.of\_WB235\_4:12891406-12891917 Satlength=512 Nr of Repeats=9  
RepeatLength=48 seed=TCATCTTCAG Num.seqs=8 Similarity=0.978175  
46 AATTTAATTTTTGATTTGCCGTAATTTATAATTTCTGAAGATGAGC  
WB235\_6:2991583-2991919 Satlength=337 Nr of Repeats=7 RepeatLength=48  
seed=AAGATGAGGA Num.seqs=7 Similarity=0.933862  
39 AATTTATTTTTTGATTTGCCGTAATTTATATTTTCTGAAGATGAGG  
Rev.of\_WB235\_6:14384735-14389919 Satlength=5185 Nr of Repeats=108  
RepeatLength=48 seed=AAATTACGGG Num.seqs=108 Similarity=0.957391  
76 AATTTAATTGTTGATTTGCCGTAATTTATATTTTCTGAAGATGAGG  
WB235\_5:1637931-1639035 Satlength=1105 Nr of Repeats=23 RepeatLength=48  
seed=CCCGTAATTT Num.seqs=23 Similarity=0.933685  
18 AATTTAAATTTTGAGTTGCCGTAATTTATAAATTTCTGAAGATGAGC

\*\*\*\* \* \* \*\*\*\* \*\*\*\*\*

Consensus:

AATTtAatTtTTGAtTTGCCGTAATTTATAtTTTCTGAAGATGAGc

```
>WB235_Fam_56_21_5  Nr. of seq. 5 Alignment length(with gaps) = 25
Alignment score = 0.616000
WB235_2:9719802-9720144 Satlength=343 Nr of Repeats=16 RepeatLength=19
seed=ATAAATATTA  Num.seqs=10 Similarity=0.961014
0  --ATAAATATTAATTAATAA----
Rev.of_WB235_4:1639384-1639487 Satlength=104 Nr of Repeats=5
RepeatLength=23 seed=ATTTAATTAA  Num.seqs=3 Similarity=0.729469
0  AAATAAATATTAATTAATAAAT--
WB235_6:5229333-5229440 Satlength=108 Nr of Repeats=5 RepeatLength=23
seed=AAATAAATATT  Num.seqs=3 Similarity=0.922705
1  AAATAAATATTAATTAATTAAT--
Rev.of_WB235_6:2004050-2004599 Satlength=550 Nr of Repeats=27
RepeatLength=19 seed=ATATTTATTT  Num.seqs=18 Similarity=0.931201
4  --ATAT----TAATTAAATAAATAA
Rev.of_WB235_4:13463617-13463705 Satlength=89 Nr of Repeats=4
RepeatLength=23 seed=AATATTTATT  Num.seqs=3 Similarity=0.961353
4  --ATATTTATTAAATAAATAAATAA
```

\*\*\* \*\*\* \*\*\* \*\*\*

Consensus:

ATAaatatTAAtTAAaTAAat

```
>WB235_Fam_57_25_5  Nr. of seq. 5 Alignment length(with gaps) = 25
Alignment score = 0.946667
WB235_1:10130602-10133102 Satlength=2501 Nr of Repeats=100
RepeatLength=25 seed=TATTTACTCT  Num.seqs=100 Similarity=0.949274
0  TATTTACTCTAATGTTCTGCCAATT
WB235_6:4026010-4030548 Satlength=4539 Nr of Repeats=181 RepeatLength=25
seed=GTTCTGCCAA  Num.seqs=178 Similarity=0.933006
13  TATTTACTCTAATGTTCTGCCAATT
Rev.of_WB235_4:6357804-6361081 Satlength=3278 Nr of Repeats=132
RepeatLength=25 seed=TAGAGTAAAT  Num.seqs=128 Similarity=0.931929
11  TATTTACTCTAATGTTCTGCTAATT
Rev.of_WB235_6:4030571-4031446 Satlength=876 Nr of Repeats=34
RepeatLength=25 seed=ATTGGCAGAA  Num.seqs=33 Similarity=0.891706
24  TATTTACTCTAATGTTCTGCCAATA
Rev.of_WB235_6:10360970-10361186 Satlength=217 Nr of Repeats=4
RepeatLength=25 seed=ATTGGCAGAA  Num.seqs=3 Similarity=0.837607
24  TATTTACTCTAATGTTCTGCCAATA
```

\*\*\*\*\*

Consensus:

TATTTACTCTAATGTTCTGCcAATt

```
>WB235_Fam_58_21_5  Nr. of seq. 5 Alignment length(with gaps) = 23
Alignment score = 0.667391
```

WB235\_3:83578-83851 Satlength=274 Nr of Repeats=13 RepeatLength=21  
seed=CCATTTTAAG Num.seqs=13 Similarity=0.947904  
0 CCATTTTAAGCC-AATTTTGGA-  
WB235\_3:83578-84096 Satlength=519 Nr of Repeats=25 RepeatLength=21  
seed=CCATTTTAAG Num.seqs=16 Similarity=0.877588  
0 CCATTTTAAGCC-AATTTTGGA-  
Rev.of\_WB235\_3:80880-81257 Satlength=378 Nr of Repeats=14 RepeatLength=21  
seed=AAATTTGGCT Num.seqs=11 Similarity=0.774105  
18 CCATTTTAAGCCAAATTTTCAA-  
Rev.of\_WB235\_4:1415278-1415575 Satlength=298 Nr of Repeats=15  
RepeatLength=21 seed=AAAATTGACT Num.seqs=10 Similarity=0.908289  
18 CGATTTTTAGTC-AATTTTGA-  
Rev.of\_WB235\_4:2182563-2182888 Satlength=326 Nr of Repeats=13  
RepeatLength=21 seed=AAAATAGCTT Num.seqs=9 Similarity=0.765993  
29 CTATTTTTAGTC-AATTT-TAAG

\* \*\*\*\*\* \* \* \*\*\*\*\* \*

Consensus:

CcATTTTaAGcCAATTTtngA

>WB235\_Fam\_59\_22\_5 Nr. of seq. 5 Alignment length(with gaps) = 22  
Alignment score = 0.630303  
WB235\_5:18201732-18201816 Satlength=85 Nr of Repeats=4 RepeatLength=21  
seed=GCACTGACCA Num.seqs=4 Similarity=1.000000  
0 GCACTGACCAAATGCAATGTT-  
Rev.of\_WB235\_6:1094209-1094314 Satlength=106 Nr of Repeats=5  
RepeatLength=21 seed=TTGGTCAGTG Num.seqs=5 Similarity=0.746032  
11 GCACTGACCAATTNNAAAATT-  
WB235\_6:1292997-1293291 Satlength=295 Nr of Repeats=14 RepeatLength=21  
seed=TTTGCACTGA Num.seqs=14 Similarity=0.853480  
18 GCACTGACCAACACGAAT-TTT  
Rev.of\_WB235\_2:2110299-2110412 Satlength=114 Nr of Repeats=5  
RepeatLength=22 seed=TGGTCAGTGC Num.seqs=3 Similarity=0.959596  
31 GCACTGACCAATAAAAATGTTT  
Rev.of\_WB235\_6:1278787-1279105 Satlength=319 Nr of Repeats=7  
RepeatLength=22 seed=GTCAGTGCAA Num.seqs=5 Similarity=0.692754  
8 GCACTGACCATGTGCACAATTT

\*\*\*\*\* \* \*\*

Consensus:

GCACTGACCAantnnAatnTTt

>WB235\_Fam\_60\_19\_5 Nr. of seq. 5 Alignment length(with gaps) = 21  
Alignment score = 0.695238  
WB235\_2:13799836-13800686 Satlength=851 Nr of Repeats=47 RepeatLength=18  
seed=AATTTACCAA Num.seqs=36 Similarity=0.737116  
0 AATTTACC-AA-TTTACCAA-  
WB235\_3:12188657-12188828 Satlength=172 Nr of Repeats=7 RepeatLength=19  
seed=CAATTTACCA Num.seqs=5 Similarity=0.791667  
7 AATTTGNC-AA-TTTACCAA

WB235\_3:12839625-12840128 Satlength=504 Nr of Repeats=16 RepeatLength=19  
seed=TTGGCAATTT Num.seqs=10 Similarity=0.809747  
22 AATTTGGC-AA-TTTACCAA  
Rev.of\_WB235\_3:1312388-1312777 Satlength=390 Nr of Repeats=16  
RepeatLength=21 seed=TTTTTGGTAA Num.seqs=13 Similarity=0.873016  
2 AAGTTACCAAATTTTACCAA  
WB235\_3:1314701-1315015 Satlength=315 Nr of Repeats=12 RepeatLength=21  
seed=CAAAAAGTTA Num.seqs=10 Similarity=0.923810  
17 AAGTTACCAAATTTTAACAA

\*\* \* \* \* \* \*

Consensus:

AATTTacCAATTTAcCAAa

>WB235\_Fam\_61\_20\_5 Nr. of seq. 5 Alignment length(with gaps) = 21  
Alignment score = 0.652381  
WB235\_2:3246632-3247175 Satlength=544 Nr of Repeats=19 RepeatLength=20  
seed=GTAAATCTAC Num.seqs=12 Similarity=0.565197  
0 GTAAATCTACACT-AGCTTCC  
WB235\_2:11906637-11907671 Satlength=1035 Nr of Repeats=44 RepeatLength=20  
seed=TAAATCTACA Num.seqs=34 Similarity=0.664092  
1 GTAAATCTACACN-GGCTTGC  
Rev.of\_WB235\_4:3652033-3652933 Satlength=901 Nr of Repeats=15  
RepeatLength=21 seed=TGTAGATTTA Num.seqs=10 Similarity=0.670875  
11 GTAAATCTACANTAGGCTCCC  
Rev.of\_WB235\_2:15194481-15194561 Satlength=81 Nr of Repeats=4  
RepeatLength=20 seed=TGTAGATTTA Num.seqs=4 Similarity=0.688889  
11 GTAAATCTACATT-GTCCTTT  
WB235\_5:18584208-18585555 Satlength=1348 Nr of Repeats=50 RepeatLength=20  
seed=GTAAATCTAC Num.seqs=35 Similarity=0.635294  
20 GTAAATCTACATN-GACCTCC

\*\*\*\*\* \*

Consensus:

GTAAATCTACAntggCttcc

>WB235\_Fam\_62\_17\_5 Nr. of seq. 5 Alignment length(with gaps) = 18  
Alignment score = 0.848148  
WB235\_2:1596937-1597005 Satlength=69 Nr of Repeats=4 RepeatLength=17  
seed=TCATTCCGTG Num.seqs=4 Similarity=1.000000  
0 TCATTCC-GTGATTATTT  
WB235\_3:4637893-4638151 Satlength=259 Nr of Repeats=5 RepeatLength=17  
seed=ATTATTTTCA Num.seqs=4 Similarity=1.000000  
10 TCATTCC-GTGATTATTT  
Rev.of\_WB235\_3:12323417-12323485 Satlength=69 Nr of Repeats=4  
RepeatLength=17 seed=TGAAAATAAT Num.seqs=4 Similarity=1.000000  
3 TCATTCC-GTGATTATTT  
WB235\_4:8789534-8789636 Satlength=103 Nr of Repeats=6 RepeatLength=17  
seed=TTCAATCCGT Num.seqs=6 Similarity=1.000000  
16 TCATTCC-GTGATTATTT



Rev.of\_WB235\_6:6114472-6114558 Satlength=87 Nr of Repeats=5  
RepeatLength=17 seed=TAATTACTGG Num.seqs=4 Similarity=0.921569  
14 T-ATTCCAGTAATTATTT

\* \*\*\*\*\*

Consensus:

TcATTCCGTgATTATTT

>WB235\_Fam\_63\_11\_5 Nr. of seq. 5 Alignment length(with gaps) = 14  
Alignment score = 0.697619  
WB235\_2:4138713-4139388 Satlength=676 Nr of Repeats=4 RepeatLength=11  
seed=TGCCTGCCTA Num.seqs=3 Similarity=0.919192  
0 TGCCT--GCCTAC-  
Rev.of\_WB235\_2:4140823-4140867 Satlength=45 Nr of Repeats=4  
RepeatLength=11 seed=GGCAGGCAGT Num.seqs=4 Similarity=0.898990  
8 TGCCT--GCCTAC-  
Rev.of\_WB235\_4:4532759-4533458 Satlength=700 Nr of Repeats=6  
RepeatLength=11 seed=GCAGTAGGCA Num.seqs=5 Similarity=0.878788  
3 TGCCT--GCCTAC-  
Rev.of\_WB235\_1:733645-734074 Satlength=430 Nr of Repeats=11  
RepeatLength=12 seed=GCAGGTAGGT Num.seqs=7 Similarity=0.841270  
3 TGCCTA--CCTACC  
WB235\_2:2966318-2968108 Satlength=1791 Nr of Repeats=54 RepeatLength=14  
seed=CTACCTGCCT Num.seqs=35 Similarity=0.800720  
9 TGCCTATGCCTACC

\*\*\*\*\*

Consensus:

TGCCTgCCTAC

>WB235\_Fam\_64\_11\_5 Nr. of seq. 5 Alignment length(with gaps) = 11  
Alignment score = 0.951515  
WB235\_1:12684455-12684521 Satlength=67 Nr of Repeats=5 RepeatLength=11  
seed=TTTGGAGCGG Num.seqs=4 Similarity=0.777778  
0 TTTGGAGCGGA  
WB235\_3:7452275-7453348 Satlength=1074 Nr of Repeats=91 RepeatLength=11  
seed=TGGAGCGGTT Num.seqs=84 Similarity=0.892314  
2 TTTGGAGCGGT  
WB235\_6:1643531-1644396 Satlength=866 Nr of Repeats=34 RepeatLength=11  
seed=GGAGCGGTTT Num.seqs=25 Similarity=0.945050  
3 TTTGGAGCGGT  
WB235\_6:8181963-8182276 Satlength=314 Nr of Repeats=28 RepeatLength=11  
seed=GAGCGGTTTT Num.seqs=21 Similarity=0.864358  
4 TTTGGAGCGGT  
WB235\_6:10369202-10370313 Satlength=1112 Nr of Repeats=99 RepeatLength=11  
seed=TGGAGCGGTT Num.seqs=97 Similarity=0.865250  
2 TTTGGAGCGGT

\*\*\*\*\*

Consensus:

TTTGGAGCGGt



gGTCTGCTAaATCaAAacTTGTAGTTTGTAGtCTAGCAGACCaAatTTcTtcAAaACCaCaTtG

>WB235\_Fam\_67\_39\_4 Nr. of seq. 4 Alignment length(with gaps) = 40  
Alignment score = 0.856944  
WB235\_1:4167811-4168323 Satlength=513 Nr of Repeats=13 RepeatLength=39  
seed=TATTTTAAAT Num.seqs=8 Similarity=0.954823  
0 TA-TTTTAAATTTGGCCTACTTAAAAAGTAGGTCATGACC  
WB235\_1:13154184-13155089 Satlength=906 Nr of Repeats=19 RepeatLength=39  
seed=TTAAAAAGTA Num.seqs=13 Similarity=0.817735  
19 TA-ATTTTAAATTTGGCCTACTTAAAAAGTAGGTCATGACC  
WB235\_1:12892561-12892756 Satlength=196 Nr of Repeats=5 RepeatLength=39  
seed=TATTTTAAAT Num.seqs=5 Similarity=0.965812  
0 TA-TTTTAAATTTAACCTACTTAAAAAGTAGGTCATGACC  
WB235\_3:10316800-10317870 Satlength=1071 Nr of Repeats=27 RepeatLength=40  
seed=AAAAAGTAGGT Num.seqs=25 Similarity=0.956889  
23 TAGTTTTTAAACGTGACCTCCTTAAAAAGTAGGTCATGACC

\*\* \* \* \* \*

Consensus:

TAtTTTAAAtTgacCTaCTTAAAAAGTAGGTCATGACC

>WB235\_Fam\_68\_36\_4 Nr. of seq. 4 Alignment length(with gaps) = 36  
Alignment score = 0.754630  
WB235\_1:3442604-3443969 Satlength=1366 Nr of Repeats=56 RepeatLength=35  
seed=TTTCGGCAAT Num.seqs=35 Similarity=0.808371  
0 TTTCGGCAATTTTCGGCAATTGCCGTTTCNTGAAT-  
Rev.of\_WB235\_4:12678404-12678576 Satlength=173 Nr of Repeats=5  
RepeatLength=35 seed=AAACCGGCAA Num.seqs=3 Similarity=0.759259  
28 TTTCGGCAATTTTCGGCAATTGCCGTTTGTGAGAAT-  
WB235\_1:14822628-14822877 Satlength=250 Nr of Repeats=7 RepeatLength=35  
seed=CGGTTTTGGA Num.seqs=5 Similarity=0.885714  
21 -TTTCGGCAATTTTCGATAATTGCCGTTTGTGAAAAAT  
WB235\_5:18110272-18110517 Satlength=246 Nr of Repeats=7 RepeatLength=35  
seed=AAATTTTCGG Num.seqs=7 Similarity=0.945578  
30 -TTTCGGCAAATTTGATAATTGCCGTTTGTGAAATT

\*\*\*\*\* \* \* \*

Consensus:

tTTTCGGCAAtTTcGacAATTGCCGTTTtggAAAt

>WB235\_Fam\_69\_30\_4 Nr. of seq. 4 Alignment length(with gaps) = 30  
Alignment score = 0.777778  
WB235\_2:13990069-13990966 Satlength=898 Nr of Repeats=30 RepeatLength=30  
seed=TTTCTAGAAA Num.seqs=24 Similarity=0.857649  
0 TTTCTAGAAAAATCTGGAACTTCTAGAAC  
Rev.of\_WB235\_3:3229003-3229241 Satlength=239 Nr of Repeats=7  
RepeatLength=30 seed=TAGAACTTTC Num.seqs=5 Similarity=0.786667  
26 TTTCTAGAAAAATTTGGAAAGTTCTAGAAAT  
Rev.of\_WB235\_3:3230816-3231055 Satlength=240 Nr of Repeats=8  
RepeatLength=30 seed=TAGAACTTTC Num.seqs=6 Similarity=0.925926  
26 TTTCTAGAGAAATTTGGAAAGTTCTAGAAAT

Rev.of\_WB235\_2:14836506-14836646 Satlength=141 Nr of Repeats=5  
RepeatLength=30 seed=TTCTGGAAAA Num.seqs=3 Similarity=0.762963  
9 TTTCCAGAAGGTTCTGGAACATTCTAGAAT

\*\*\*\* \* \* \* \* \*

Consensus:

TTTCTAGAaaaaTcTGGAAGTTCTAGAAt

>WB235\_Fam\_70\_30\_4 Nr. of seq. 4 Alignment length(with gaps) = 30  
Alignment score = 0.983333  
WB235\_2:14878787-14878927 Satlength=141 Nr of Repeats=5 RepeatLength=30  
seed=AATTTTCCAG Num.seqs=3 Similarity=0.792593  
0 AATTTTCCAGAAGGTTCTGGAACATTCCAG  
WB235\_4:9411472-9411612 Satlength=141 Nr of Repeats=5 RepeatLength=30  
seed=AATTTTCCAG Num.seqs=3 Similarity=0.822222  
0 AATTTTCCAGAAGGTTCTGGAACATTCCAG  
WB235\_6:1376606-1376746 Satlength=141 Nr of Repeats=5 RepeatLength=30  
seed=AATTTTCCAG Num.seqs=3 Similarity=0.792593  
0 AATTTTCCAGAAGGTTCTGGAACATTCCAG  
WB235\_6:516878-517017 Satlength=140 Nr of Repeats=5 RepeatLength=30  
seed=AATTTTCCAG Num.seqs=3 Similarity=0.807407  
0 AATTTTCCAGAAGGTTCTGGAACNTTCCAG

\*\*\*\*\*

Consensus:

AATTTTCCAGAAGGTTCTGGAACaTTCCAG

>WB235\_Fam\_71\_21\_4 Nr. of seq. 4 Alignment length(with gaps) = 21  
Alignment score = 0.907407  
WB235\_1:12910137-12910261 Satlength=125 Nr of Repeats=6 RepeatLength=21  
seed=AATCCAATAT Num.seqs=5 Similarity=0.790476  
0 AATCCAATATGGANGAAATCT  
Rev.of\_WB235\_2:14802929-14803074 Satlength=146 Nr of Repeats=7  
RepeatLength=21 seed=ATTGGATTAG Num.seqs=6 Similarity=0.792593  
8 AATCCAATATGGAAGAAATCT  
WB235\_3:6626010-6626226 Satlength=217 Nr of Repeats=6 RepeatLength=21  
seed=AAATCTAATC Num.seqs=5 Similarity=0.822727  
15 AATCCAATATGGNCGAAATCT  
Rev.of\_WB235\_5:2636817-2636991 Satlength=175 Nr of Repeats=6  
RepeatLength=21 seed=GATTAGATTT Num.seqs=5 Similarity=0.841270  
25 AATCCAATATGGACNAAATCT

\*\*\*\*\*

Consensus:

AATCCAATATGGacgAAATCT

>WB235\_Fam\_72\_19\_4 Nr. of seq. 4 Alignment length(with gaps) = 20  
Alignment score = 0.761111  
WB235\_4:229906-231132 Satlength=1227 Nr of Repeats=63 RepeatLength=18  
seed=CTCAACCAA Num.seqs=43 Similarity=0.898938  
0 CTCAACCAA--ACTCTTAGC

WB235\_4:238538-239383 Satlength=846 Nr of Repeats=8 RepeatLength=18  
seed=AGCCTCAACC Num.seqs=5 Similarity=0.925926  
15 CTCAACCAA--ACTCTTAGC  
Rev.of\_WB235\_4:122695-123566 Satlength=872 Nr of Repeats=28  
RepeatLength=19 seed=TTGGTTGAGG Num.seqs=19 Similarity=0.809582  
9 CTCAACCAA-AATTGTTAGC  
WB235\_4:215697-216357 Satlength=661 Nr of Repeats=32 RepeatLength=20  
seed=CTCAGCCTCA Num.seqs=30 Similarity=0.934713  
14 CTCAACCAAAAATTCTCAGC

\*\*\*\*\* \* \* \* \*\*

Consensus:

CTCAACCAAaAcTcTtAGC

>WB235\_Fam\_73\_20\_4 Nr. of seq. 4 Alignment length(with gaps) = 20  
Alignment score = 0.744444  
WB235\_1:14477083-14477203 Satlength=121 Nr of Repeats=6 RepeatLength=20  
seed=GTGAAATTTT Num.seqs=6 Similarity=0.705820  
0 GTGAAATTTTAAATTTTAA  
WB235\_2:14984666-14984990 Satlength=325 Nr of Repeats=14 RepeatLength=20  
seed=TTCAAGTCAAA Num.seqs=10 Similarity=0.802963  
16 GTCAAAATTTAAATTTTCA  
WB235\_5:19935725-19935960 Satlength=236 Nr of Repeats=11 RepeatLength=20  
seed=TTTGAATTTT Num.seqs=7 Similarity=0.936508  
7 GTGAAAATTTGAATTTTGA  
WB235\_5:20406247-20406428 Satlength=182 Nr of Repeats=9 RepeatLength=20  
seed=AAAAATTCAAA Num.seqs=6 Similarity=0.778836  
3 CTGAAAATTCAAATTTCTGA

\* \*\*\* \*\* \*\*\*\*\* \* \*

Consensus:

gTgAAAaTTtaAATTTtTgA

>WB235\_Fam\_74\_17\_4 Nr. of seq. 4 Alignment length(with gaps) = 18  
Alignment score = 0.902778  
WB235\_2:1659657-1659775 Satlength=119 Nr of Repeats=7 RepeatLength=17  
seed=GATGCCCCCT Num.seqs=5 Similarity=0.729630  
0 GATGCCCCCTTTGAACG-  
Rev.of\_WB235\_3:4254156-4254274 Satlength=119 Nr of Repeats=7  
RepeatLength=17 seed=AGGGGGCATC Num.seqs=5 Similarity=0.749020  
10 GATGCCCCCTCTGAACG-  
WB235\_3:4257044-4257162 Satlength=119 Nr of Repeats=7 RepeatLength=17  
seed=GATGCCCCCT Num.seqs=5 Similarity=0.729630  
17 GATGCCCCCTCTGAACG-  
WB235\_4:4198521-4198622 Satlength=102 Nr of Repeats=6 RepeatLength=17  
seed=GATGCCCCCT Num.seqs=4 Similarity=0.722222  
0 GATGCCCCCTCTGAACGN

\*\*\*\*\* \*\*\*\*\*

Consensus:

GATGCCCCCTcTGAACG

>WB235\_Fam\_75\_16\_4 Nr. of seq. 4 Alignment length(with gaps) = 16  
Alignment score = 0.847222  
WB235\_1:7780058-7780728 Satlength=671 Nr of Repeats=39 RepeatLength=16  
seed=AATTTTCCG Num.seqs=31 Similarity=0.814158  
0 AATTTTCCGCNGCGA  
Rev.of\_WB235\_2:7449335-7450152 Satlength=818 Nr of Repeats=42  
RepeatLength=16 seed=CGGAAAATT Num.seqs=27 Similarity=0.719401  
10 AATTTTCCGCNGCNA  
Rev.of\_WB235\_5:13640261-13645859 Satlength=5599 Nr of Repeats=335  
RepeatLength=16 seed=GAAAAATTTT Num.seqs=281 Similarity=0.744871  
8 AATTTTTCAGCAGCAA  
Rev.of\_WB235\_5:13640261-13646660 Satlength=6400 Nr of Repeats=357  
RepeatLength=16 seed=GAAAAATTTT Num.seqs=293 Similarity=0.745623  
8 AATTTTCCGCAGCAA

\*\*\*\*\* \*\* \*\* \*

Consensus:

AATTTTTCcGCaGCaA

>WB235\_Fam\_76\_14\_4 Nr. of seq. 4 Alignment length(with gaps) = 15  
Alignment score = 0.727778  
WB235\_2:3033725-3034005 Satlength=281 Nr of Repeats=20 RepeatLength=14  
seed=TTAGGGCCTT Num.seqs=20 Similarity=0.947368  
0 TTAGGGCCTTGGGC-  
Rev.of\_WB235\_4:154583-154709 Satlength=127 Nr of Repeats=8  
RepeatLength=14 seed=CCTAAGCCTA Num.seqs=7 Similarity=0.918367  
5 TTAGGGCCTTAGGC-  
WB235\_6:16199460-16199628 Satlength=169 Nr of Repeats=12 RepeatLength=14  
seed=CTTAGGGCCTT Num.seqs=12 Similarity=0.894661  
6 TTAGGGCCTTAGGGC-  
Rev.of\_WB235\_2:3153871-3153936 Satlength=66 Nr of Repeats=4  
RepeatLength=14 seed=CCAAGGCCCA Num.seqs=3 Similarity=0.746032  
4 TT-GGGCCTTGGGCC

\*\* \*\*\*\*\* \*\*

Consensus:

TTaGGGCcTtgGGC

>WB235\_Fam\_77\_15\_4 Nr. of seq. 4 Alignment length(with gaps) = 15  
Alignment score = 0.955556  
WB235\_1:4185588-4185648 Satlength=61 Nr of Repeats=4 RepeatLength=15  
seed=TTCCGGATC Num.seqs=4 Similarity=0.911111  
0 TTCCGGATCTACGT  
Rev.of\_WB235\_1:4185829-4185964 Satlength=136 Nr of Repeats=9  
RepeatLength=15 seed=AGATCCGGAA Num.seqs=9 Similarity=1.000000  
11 TTCCGGATCTACGT  
Rev.of\_WB235\_1:6854524-6854599 Satlength=76 Nr of Repeats=5  
RepeatLength=15 seed=AGATCCGGAA Num.seqs=5 Similarity=0.928889  
11 TTCCGGATCTACGT

WB235\_2:12763248-12763368 Satlength=121 Nr of Repeats=7 RepeatLength=15  
seed=ATTTCGGAT Num.seqs=6 Similarity=0.922963  
14 TTTCCGGATCTACGA

\*\*\*\*\*

Consensus:

TTTCCGGATCTACGt

>WB235\_Fam\_78\_13\_4 Nr. of seq. 4 Alignment length(with gaps) = 13  
Alignment score = 0.897436  
WB235\_5:1027504-1027725 Satlength=222 Nr of Repeats=11 RepeatLength=13  
seed=GCCTATGGCC Num.seqs=7 Similarity=0.912088  
0 GCCTATGGCCTAC  
Rev.of\_WB235\_5:1028226-1028460 Satlength=235 Nr of Repeats=18  
RepeatLength=13 seed=CGTAGGCCAT Num.seqs=18 Similarity=0.894754  
1 GCCTATGGCCTAC  
WB235\_5:2102635-2102940 Satlength=306 Nr of Repeats=21 RepeatLength=13  
seed=GCCTAAGCCT Num.seqs=17 Similarity=0.930618  
7 GCCTATGGCCTAA  
Rev.of\_WB235\_6:5125291-5125369 Satlength=79 Nr of Repeats=6  
RepeatLength=13 seed=GCCATAGGCG Num.seqs=6 Similarity=0.931624  
9 GCCTATGGCTTAC

\*\*\*\*\* \*\*

Consensus:

GCCTATGGCcTAc

>WB235\_Fam\_79\_12\_4 Nr. of seq. 4 Alignment length(with gaps) = 12  
Alignment score = 0.840278  
WB235\_1:2014890-2015108 Satlength=219 Nr of Repeats=13 RepeatLength=11  
seed=TTTTGCCGAA Num.seqs=10 Similarity=0.811448  
0 TTTTGCCGAAC-  
WB235\_1:5563061-5563217 Satlength=157 Nr of Repeats=13 RepeatLength=12  
seed=GAAATTTTTT Num.seqs=13 Similarity=0.948718  
7 TTTTCCGAAAT  
WB235\_1:12479088-12479300 Satlength=213 Nr of Repeats=16 RepeatLength=12  
seed=GAAATTTTTT Num.seqs=12 Similarity=0.915825  
7 TTTTCCGAAAT  
Rev.of\_WB235\_1:12479365-12479989 Satlength=625 Nr of Repeats=49  
RepeatLength=12 seed=AAAAATTTC Num.seqs=34 Similarity=0.902159  
17 TTTTCCGAAAT

\*\*\*\* \*\*\*\*\*

Consensus:

TTTTtCCGAAat

>WB235\_Fam\_80\_12\_4 Nr. of seq. 4 Alignment length(with gaps) = 12  
Alignment score = 0.662037  
WB235\_4:5273292-5273664 Satlength=373 Nr of Repeats=18 RepeatLength=12  
seed=AGAAGGAGGA Num.seqs=11 Similarity=0.864646  
0 AGAAGGAGGAAA

>WB235\_Fam\_82\_167\_3 Nr. of seq. 3 Alignment length(with gaps) = 172  
Alignment score = 0.656977  
WB235\_3:449837-453285 Satlength=3449 Nr of Repeats=21 RepeatLength=164  
seed=ATATAATGCT Num.seqs=17 Similarity=0.956420  
0  
ATATAATGCTCGTAATTATTTATAAGTGTGTGTTGTCTCAGAGCCACGTCTGAAAAATACAGATTTTTTCTCGA



AAATTT---CAAAACTTTTGTA-GAAATTCGATTTTTTGAC--  
 ATAAATGATCTCTCTTTTTTTCTGACATGTATTTTCAGTGACAAA-TGGANT-AGAAA  
 WB235\_2:14333431-14337579 Satlength=4149 Nr of Repeats=25  
 RepeatLength=166 seed=TCGTAATTAT Num.seqs=23 Similarity=0.971618  
 8 -  
 TATAATGTTTCGTAATTATTTCATAAGTTTGTGTTGTCTCAGAGCCATGTCTGAAAAACAGATTTTTTTTTTCGAA  
 AATTT---TAAAAAGTTCGTA-  
 AAAATTGGATTTTTTGACAAATCTATGCTCTCTTTTTTTGTTTAAAATTTAGTTCAGTGACATA-  
 CAATTTCAAAAA  
 WB235\_2:13243398-13244452 Satlength=1055 Nr of Repeats=6 RepeatLength=165  
 seed=AAAATTC AAT Num.seqs=5 Similarity=0.933737  
 94 TTATAATGCTCGTAATTATTTATAAGTGTGTGTTGTCTCAGAATCAATTCT-  
 AAAAAACAGATTTTTTTTT-GAAAGTTTAAAGTAATATCCGCGGAGAAAATTCAATTTTGGACATTTCTAT--  
 TATCT-TTTTTTTAAACATGTATTTTCAGTGA-ATAGAAGACTCAAAA-

\*\*\*\*\*  
 \*\*\*\* \*  
 \*\* \*\*\*\*\*

Consensus:

nTATAATGcTCGTAATTATTTATAAGTgTGTGTTGTCTCAGAgcCAngTCTgAAAAaACAGATTTTTTTtTcGA  
 AAaTTTtAAaAacttcGtAaAAATTcgATTTTTtGACanaTctATgnTcTcTnTTTTTTtTntaAcATgTatTTC  
 AGTGAcAtAnaganTcAaAAa

>WB235\_Fam\_83\_90\_3 Nr. of seq. 3 Alignment length(with gaps) = 95  
 Alignment score = 0.673684  
 WB235\_5:19466947-19467275 Satlength=329 Nr of Repeats=4 RepeatLength=82  
 seed=CCCCGAACGT Num.seqs=4 Similarity=0.948510  
 0 CCCCCGAACGTGTCGGCCGCTTCC--AAATAACCACCTCCTTGCACTACGTTGCGCACACA-----  
 CTCATTTACGCCAAGCTGCGGAA--  
 WB235\_5:1539714-1540122 Satlength=409 Nr of Repeats=5 RepeatLength=89  
 seed=GCACTACGTT Num.seqs=3 Similarity=0.740741  
 38 CCCTGAACGTGTCGGCCGC-TCC--  
 AAATAACTACCTTCTNGCACTACGTTGCGCACACACTAAGCTACTCGTTTCACGCCAAGCTACGGAA---  
 WB235\_3:1643024-1643390 Satlength=367 Nr of Repeats=4 RepeatLength=92  
 seed=CTGCGGAACC Num.seqs=3 Similarity=1.000000  
 81 ---  
 CGAACGTGTCGGCCGCTTCCAAAAACAACCACCTCTTCACACTTCATTGCGCACACACCAAACCTACTAGTTTC  
 ACGTCAAACTGCGGAACCC

\*\*\*\*\*  
 \*\*\*\*\*

Consensus:

ccccGAACGTGTCGGCCGCTTCCAAAtAACcACCTccTngCACTaCgTTGCGCACACAcnaanctaCTcgTTT  
 CACGcCAAgCTgCGGAA

>WB235\_Fam\_84\_79\_3 Nr. of seq. 3 Alignment length(with gaps) = 79  
 Alignment score = 0.912799  
 WB235\_2:3941820-3946547 Satlength=4728 Nr of Repeats=58 RepeatLength=79  
 seed=GTGAATCTCC Num.seqs=53 Similarity=0.979228  
 0  
 GTGAATCTCCTCTCCACCTAATGATTCTGACAGAATACCGGCAGTATTCTGGGGTCTCATTAGGTTTTAGTT  
 TCTTCT

Rev.of\_WB235\_4:11033628-11036077 Satlength=2450 Nr of Repeats=31  
RepeatLength=79 seed=GAAACTAAAA Num.seqs=31 Similarity=0.920108  
75

GTGAATCTCCTCTCTACCTAATGAGTCCTGACAGAATACCGGCAGTATTCTGGGGTCTCATTAGGTTTTAGTT  
TCTTCT

WB235\_2:8287652-8292933 Satlength=5282 Nr of Repeats=61 RepeatLength=79  
seed=TGAGTCCTGA Num.seqs=58 Similarity=0.902451  
21

CTGAATCTCCACTCTTCCTAATGAGTCCTGACAGAATACCGGCAGTATTTTGGGGTCTCATTAGGTTTTNGTT  
TCTTTT

\*\*\*\*\* \*\*\* \*\*\*\*\* \*\*\*\*\*

\*\*\*\*\* \*

Consensus:

gTGAATCTCCTcCTcTaCCTAATGAgTCCTGACAGAATACCGGCAGTATTcTGGGGTCTCATTAGGTTTTaGTT  
TCTTcT

>WB235\_Fam\_85\_76\_3 Nr. of seq. 3 Alignment length(with gaps) = 76  
Alignment score = 0.906433

WB235\_4:14205760-14206748 Satlength=989 Nr of Repeats=13 RepeatLength=76  
seed=AATGCTAGAG Num.seqs=13 Similarity=0.967611  
0

AATGCTAGAGGACACTCCTTTGCACGAAAGGAAGTGGGAGAGACTGTGGAGTTGTTCGGTGTCTTTGTGCATGC  
TCG

Rev.of\_WB235\_4:14210874-14215456 Satlength=4583 Nr of Repeats=61  
RepeatLength=76 seed=TCGTGCAAAG Num.seqs=60 Similarity=0.948617  
27

AATGCTAGAGGACATTCTTTGCACGAAAGGAAGTGGGAGAGACTGTGGAGTTGTTCGGTGTCTTTGTGCATGC  
TCG

Rev.of\_WB235\_6:16758347-16761606 Satlength=3260 Nr of Repeats=43  
RepeatLength=76 seed=AGCATTAGAG Num.seqs=34 Similarity=0.949620  
6

AATGCTAGAAGACACTCCTTTGCACGAAGGAAAGTGGGAGAGACTGTGGTGTTCGGTGTCTGTGTACATGC  
TCT

\*\*\*\*\* \*\*\*\* \*\*\*\*\* \* \*\*\*\*\* \*\*\*\*\*

\*\*\*\*\*

Consensus:

AATGCTAGAgGACAcTCCTTTGCACGAAGgAAGTGGGAGAGACTGTGGaGTTGTTCGGTGTCTtTGTgCATGC  
TCg

>WB235\_Fam\_86\_66\_3 Nr. of seq. 3 Alignment length(with gaps) = 68  
Alignment score = 0.892157

WB235\_1:9821430-9822959 Satlength=1530 Nr of Repeats=23 RepeatLength=66  
seed=AATCAACCTA Num.seqs=16 Similarity=0.986869  
0

AATCAACCTATTTCAGTTGACAATGGTTTTCTTTTATCAAATTTTTTAAAATTT--TAAAGAAAACACA  
WB235\_4:17059789-17062957 Satlength=3169 Nr of Repeats=48 RepeatLength=66  
seed=CAAATCAACC Num.seqs=48 Similarity=0.956050  
64

AATCAACCTATTTCAGTTGACAATGGTTTTCTTTTATCAAATTTTTTAAAATTT--  
TAAAGAAAACACA

Rev.of\_WB235\_1:10204129-10219199 Satlength=15071 Nr of Repeats=223  
RepeatLength=68 seed=ACTGAATAGG Num.seqs=140 Similarity=0.978159

16

AATCAACCTATTTCAGTTGACAATGGTTTTCTTTTACCAAAATTTCTTAGAATTTTCAGAAAGAAAACACA

\*\*\*\*\*  
Consensus:

AATCAACCTATTTCAGTTGACAATGGTTTTCTTTTAtCAAAtTTtTTAaAATTTtAAAGAAAACACA

>WB235\_Fam\_87\_64\_3 Nr. of seq. 3 Alignment length(with gaps) = 64  
Alignment score = 0.954861  
WB235\_1:13929375-13929595 Satlength=221 Nr of Repeats=5 RepeatLength=63  
seed=TTTTTGACTA Num.seqs=3 Similarity=0.876736  
0 TTTTTGACTACGGAATGTCTTTTTTCGCTACTGACTG-AAAAATAGCTACATTCGCACTTTTGNC  
Rev.of\_WB235\_1:13935628-13936488 Satlength=861 Nr of Repeats=15  
RepeatLength=64 seed=GTAGTCAAAA Num.seqs=10 Similarity=0.982870  
11 TTTTTGACTACTGAATGTCTTTTTTCGCTACTGACTGAAAAAATAGCTACATTCGCACTTTTGTC  
Rev.of\_WB235\_5:14204941-14205737 Satlength=797 Nr of Repeats=14  
RepeatLength=64 seed=GTAGTCAAAA Num.seqs=9 Similarity=0.983796  
11 TTTTTGACTACTGAATGTCTTTTTTCGCTACTGACTGAAAAAATAGCTACATTCGCACTTTTGTC

\*\*\*\*\*  
Consensus:

TTTTTGACTActGAATGTCTTTTTTCGCTACTGACTGaAAAAATAGCTACATTCGCACTTTTGtC

>WB235\_Fam\_88\_34\_3 Nr. of seq. 3 Alignment length(with gaps) = 34  
Alignment score = 0.980392  
WB235\_1:11432554-11432811 Satlength=258 Nr of Repeats=6 RepeatLength=34  
seed=ATGCACCATG Num.seqs=4 Similarity=0.679739  
0 ATGCACCATGTCAAAAAATATATCCAAAAGTACG  
WB235\_1:11455940-11456197 Satlength=258 Nr of Repeats=6 RepeatLength=34  
seed=ATGCACCATG Num.seqs=4 Similarity=0.679739  
0 ATGCACCATGTCAAAAAATATATCCAAAAGTACG  
WB235\_1:12258128-12258286 Satlength=159 Nr of Repeats=5 RepeatLength=34  
seed=ATGCACCATG Num.seqs=4 Similarity=0.712418  
0 ATGCACCATGTCAAAAAATATATCCAAAANTACG

\*\*\*\*\*  
Consensus:

ATGCACCATGTCAAAAAATATATCCAAAAGTACG

>WB235\_Fam\_89\_32\_3 Nr. of seq. 3 Alignment length(with gaps) = 32  
Alignment score = 0.972222  
WB235\_4:13909776-13910308 Satlength=533 Nr of Repeats=19 RepeatLength=32  
seed=CGACCTGCGA Num.seqs=14 Similarity=0.994048  
0 CGACCTGCGACCTAGCGACCTGGGTCGCTTTG  
WB235\_6:2307188-2307299 Satlength=112 Nr of Repeats=4 RepeatLength=32  
seed=CGACCTGCGA Num.seqs=3 Similarity=0.805556  
0 CGACCTGCGACCTAGCGACCTAGGTCGCTTTG  
WB235\_6:12578040-12578842 Satlength=803 Nr of Repeats=12 RepeatLength=32  
seed=CGACCTAGGT Num.seqs=8 Similarity=0.956845  
15 CGACCTGCGACCTAGCGACCTAGGTCGCTTTG

\*\*\*\*\*

Consensus:

CGACCTGCGACCTAGCGACCTaGGTCGCTTTG

>WB235\_Fam\_90\_27\_3 Nr. of seq. 3 Alignment length(with gaps) = 27

Alignment score = 0.658436

WB235\_4:2967003-2967147 Satlength=145 Nr of Repeats=6 RepeatLength=24

seed=GCGGCCGACA Num.seqs=6 Similarity=0.855556

0 -GCGGCCGACACCTTACGGGTTG--TA

WB235\_2:13502158-13503434 Satlength=1277 Nr of Repeats=26 RepeatLength=27

seed=AGCAGCCGAC Num.seqs=20 Similarity=0.791813

0 AGCAGCCGACACCTTGCNGGTTGCTTA

WB235\_5:19555359-19555663 Satlength=305 Nr of Repeats=8 RepeatLength=27

seed=GCAGCCGACA Num.seqs=6 Similarity=0.584291

1 AGCAGCCGACACCTCACTGGTCCCTNA

\*\* \*\*\*\*\* \* \*\* \*

Consensus:

aGCaGCCGACACCTtaCnGGTtgcttA

>WB235\_Fam\_91\_26\_3 Nr. of seq. 3 Alignment length(with gaps) = 26

Alignment score = 0.965812

WB235\_2:2157814-2157944 Satlength=131 Nr of Repeats=5 RepeatLength=26

seed=TCAAGGCGAA Num.seqs=5 Similarity=0.979487

0 TCAAGGCGAAACGGGAGGTGAATCGC

Rev.of\_WB235\_5:8836966-8837173 Satlength=208 Nr of Repeats=8

RepeatLength=26 seed=TTCGCCCTGA Num.seqs=7 Similarity=0.907204

10 TCAGGGCGAAACGGGAGGTGAATCGC

Rev.of\_WB235\_5:8879060-8879267 Satlength=208 Nr of Repeats=8

RepeatLength=26 seed=TTCGCCCTGA Num.seqs=7 Similarity=0.907204

10 TCAGGGCGAAACGGGAGGTGAATCGC

\*\*\* \*\*\*\*\*

Consensus:

TCAgGGCGAAACGGGAGGTGAATCGC

>WB235\_Fam\_92\_21\_3 Nr. of seq. 3 Alignment length(with gaps) = 23

Alignment score = 0.801932

WB235\_2:13342774-13342879 Satlength=106 Nr of Repeats=5 RepeatLength=21

seed=CTAGAAAAAC Num.seqs=5 Similarity=0.898413

0 CTA-GAAAAACTCGGCCATCAA-

Rev.of\_WB235\_2:13343764-13344901 Satlength=1138 Nr of Repeats=46

RepeatLength=21 seed=TTTTCTAGTT Num.seqs=34 Similarity=0.794245

8 CTA-GAAAAACTCGGCCATCAA-

WB235\_2:642340-642984 Satlength=645 Nr of Repeats=25 RepeatLength=23

seed=GGCCACCAAT Num.seqs=20 Similarity=0.753776

13 CTATAAAAAACTCGGCCACCAAT

\*\*\* \*\*\*\*\*

Consensus:

CTAgAAAAAACTCGGCCAtCAA

>WB235\_Fam\_93\_21\_3 Nr. of seq. 3 Alignment length(with gaps) = 23  
Alignment score = 0.608696  
WB235\_3:2103059-2103647 Satlength=589 Nr of Repeats=25 RepeatLength=21  
seed=GCCTAAAAAC Num.seqs=16 Similarity=0.805291  
0 GCCTAAAAA--CGTAAATTTTAA  
Rev.of\_WB235\_4:2702010-2702785 Satlength=776 Nr of Repeats=31  
RepeatLength=21 seed=TTTGGATTTT Num.seqs=25 Similarity=0.861799  
15 GCCTAAAAA--TCCAATTTTAA  
WB235\_1:898453-898911 Satlength=459 Nr of Repeats=21 RepeatLength=22  
seed=TTTtagccAA Num.seqs=17 Similarity=0.862299  
16 -CCAAAAAATCCGTTAATTTTAG

\*\* \*\*\*\*\*  
Consensus:

gCcTAAAAAcgtaAATTTTAa

>WB235\_Fam\_94\_21\_3 Nr. of seq. 3 Alignment length(with gaps) = 23  
Alignment score = 0.748792  
WB235\_4:3754942-3755101 Satlength=160 Nr of Repeats=5 RepeatLength=21  
seed=TAGTTTGTAG Num.seqs=3 Similarity=0.661376  
0 TAG-TTT-ATAGTTTGcAGTTTG  
WB235\_5:3651539-3651616 Satlength=78 Nr of Repeats=4 RepeatLength=21  
seed=AGTTTGTAGT Num.seqs=3 Similarity=0.640212  
1 TAG-TTT-GTAGTTTGTNGTTTG  
Rev.of\_WB235\_1:12893074-12893850 Satlength=777 Nr of Repeats=11  
RepeatLength=23 seed=ACTACAAACT Num.seqs=10 Similarity=1.000000  
4 TAGTTTTcATAGTTTGTAGTTTG

\*\*\* \*\* \*\*\*\*\*  
Consensus:

TAGTTTaTAGTTTGtaGTTTG

>WB235\_Fam\_95\_20\_3 Nr. of seq. 3 Alignment length(with gaps) = 22  
Alignment score = 0.656566  
WB235\_3:3042951-3043689 Satlength=739 Nr of Repeats=38 RepeatLength=18  
seed=GTCGATTTAC Num.seqs=33 Similarity=0.778900  
0 GTCGATTTACG-AGA-TTN--T  
Rev.of\_WB235\_2:13737396-13737775 Satlength=380 Nr of Repeats=15  
RepeatLength=21 seed=CTCGTAAATC Num.seqs=9 Similarity=0.754630  
13 GTCGATTTACGAGGAGTTC-TT  
WB235\_4:1848441-1848937 Satlength=497 Nr of Repeats=18 RepeatLength=21  
seed=TGTCGATTTA Num.seqs=15 Similarity=0.738095  
21 GTCGATTTACG-GGAGTTCAGT

\*\*\*\*\* \*\* \*\*  
Consensus:

GTCGATTTACGgGAgTTcnT

>WB235\_Fam\_96\_22\_3 Nr. of seq. 3 Alignment length(with gaps) = 22  
Alignment score = 0.777778  
WB235\_2:2733211-2733873 Satlength=663 Nr of Repeats=24 RepeatLength=22  
seed=ACTACAGTAA Num.seqs=18 Similarity=0.729847  
0 ACTACAGTAACCCTACANTACC  
WB235\_5:1025021-1025505 Satlength=485 Nr of Repeats=20 RepeatLength=22  
seed=ACAGTACTCC Num.seqs=16 Similarity=0.776630  
3 ANTACAGTACTCCTACAGTACC  
Rev.of\_WB235\_5:16536032-16536834 Satlength=803 Nr of Repeats=14  
RepeatLength=22 seed=GGGTACTGTA Num.seqs=9 Similarity=0.840067  
12 ACTACAGTACCCATACAGTACT

\* \* \* \* \*

Consensus:

AcTACAGTAccCcTACAgTACc

>WB235\_Fam\_97\_19\_3 Nr. of seq. 3 Alignment length(with gaps) = 21  
Alignment score = 0.608466  
WB235\_1:2524693-2524982 Satlength=290 Nr of Repeats=10 RepeatLength=18  
seed=GCCTAGGAAT Num.seqs=8 Similarity=0.772487  
0 GCCTAGGAAT-CCAAT--ATG  
Rev.of\_WB235\_1:1278237-1279259 Satlength=1023 Nr of Repeats=33  
RepeatLength=19 seed=TTCTAGGCCA Num.seqs=21 Similarity=0.753383  
8 GCCTAGAAATCCTCA--GATG  
Rev.of\_WB235\_1:1108035-1108695 Satlength=661 Nr of Repeats=21  
RepeatLength=20 seed=ATTTCTAGGC Num.seqs=13 Similarity=0.625153  
10 GCCTAGAAAT-CTNATNGATG

\*\*\*\*\* \* \* \*

Consensus:

GCCTAGaAATCtnAtgATG

>WB235\_Fam\_98\_18\_3 Nr. of seq. 3 Alignment length(with gaps) = 21  
Alignment score = 0.761905  
WB235\_6:3338986-3339541 Satlength=556 Nr of Repeats=27 RepeatLength=18  
seed=TTTGTGTCAGT Num.seqs=20 Similarity=0.766579  
0 TTTGTGTCAGTGCT--ATAGT  
WB235\_6:3392053-3392273 Satlength=221 Nr of Repeats=10 RepeatLength=18  
seed=TTGTCAGTGC Num.seqs=7 Similarity=0.848325  
2 TTTGTGTCAGTGCT--ATAGT  
Rev.of\_WB235\_6:1544700-1544784 Satlength=85 Nr of Repeats=4  
RepeatLength=21 seed=TCTGAGCACT Num.seqs=4 Similarity=0.925926  
17 TTTGTGTCAGTGCTCAGATAAT

\*\*\*\*\* \* \* \*

Consensus:

TTTGTGTCAGTGCTATAgT

>WB235\_Fam\_99\_21\_3 Nr. of seq. 3 Alignment length(with gaps) = 21  
Alignment score = 0.767196

WB235\_3:1154872-1155214 Satlength=343 Nr of Repeats=4 RepeatLength=21  
seed=ACTACAGTAC Num.seqs=3 Similarity=0.788360  
0 ACTACAGTACCCCNACNACT  
WB235\_4:14426797-14427553 Satlength=757 Nr of Repeats=36 RepeatLength=21  
seed=CAACTACCAC Num.seqs=36 Similarity=0.943361  
10 ACTACCGTACCAACTACCACA  
WB235\_4:14447004-14447298 Satlength=295 Nr of Repeats=13 RepeatLength=21  
seed=ACTACCGTAC Num.seqs=12 Similarity=0.895142  
21 ACTACCGTACCAACTACCACA

\*\*\*\*\* \* \* \*

Consensus:

ACTACcGTACCaaCtACcACa

>WB235\_Fam\_100\_21\_3 Nr. of seq. 3 Alignment length(with gaps) = 21  
Alignment score = 0.957672  
WB235\_5:3373171-3373906 Satlength=736 Nr of Repeats=20 RepeatLength=21  
seed=CTAACATTTT Num.seqs=12 Similarity=0.927850  
0 CTAACATTTTTCAATTTTCGT  
WB235\_5:16625438-16625585 Satlength=148 Nr of Repeats=7 RepeatLength=21  
seed=ATTTTCAAT Num.seqs=7 Similarity=0.848828  
5 CTAACATTTTTCAATTTTCGT  
WB235\_5:3632093-3632198 Satlength=106 Nr of Repeats=5 RepeatLength=21  
seed=TTTCAGTTTT Num.seqs=5 Similarity=0.911111  
8 CTAACATTTTTCAGTTTTCGT

\*\*\*\*\*

Consensus:

CTAACATTTTTCAaTTTTCGT

>WB235\_Fam\_101\_21\_3 Nr. of seq. 3 Alignment length(with gaps) = 21  
Alignment score = 0.682540  
WB235\_6:1214446-1215096 Satlength=651 Nr of Repeats=6 RepeatLength=21  
seed=GTCAAGTCAA Num.seqs=4 Similarity=0.809524  
34 AAATGCATTTTTGGTCAGTGC  
Rev.of\_WB235\_6:1325710-1325901 Satlength=192 Nr of Repeats=7  
RepeatLength=21 seed=TTGCACTGAC Num.seqs=6 Similarity=0.630303  
44 AAATGAAGAGTTGGTCAGTGC  
WB235\_6:15295722-15295953 Satlength=232 Nr of Repeats=11 RepeatLength=21  
seed=TGAAAGATTG Num.seqs=9 Similarity=0.957672  
28 GTGCCTATGAAAGATTGGTCA

\*\* \* \*

Consensus:

GTgcaaatgnAtnnttGgTca

>WB235\_Fam\_102\_20\_3 Nr. of seq. 3 Alignment length(with gaps) = 20  
Alignment score = 0.688889  
WB235\_2:13528439-13528985 Satlength=547 Nr of Repeats=24 RepeatLength=20  
seed=GTAAATCGAC Num.seqs=16 Similarity=0.655886  
10 ACACNACGTCGTAAATCGAC

Rev.of\_WB235\_3:2036337-2036525 Satlength=189 Nr of Repeats=9  
RepeatLength=20 seed=TGTAGATTTA Num.seqs=6 Similarity=0.697778  
21 ATAGAACCCCGTAAATCTAC  
Rev.of\_WB235\_3:12835769-12836969 Satlength=1201 Nr of Repeats=30  
RepeatLength=20 seed=TGTAGATTTA Num.seqs=22 Similarity=0.674981  
21 ATAGANCTTCGTAAATCTAC

\*\*\*\*\* \* \* \*

Consensus:

GTAAATCtACAtAgaaCntC

>WB235\_Fam\_103\_20\_3 Nr. of seq. 3 Alignment length(with gaps) = 20  
Alignment score = 0.777778  
WB235\_4:8572647-8581868 Satlength=9222 Nr of Repeats=443 RepeatLength=20  
seed=CGATATAGCT Num.seqs=408 Similarity=0.824886  
0 CGATATAGCTATTAACGATA  
Rev.of\_WB235\_6:4031472-4056497 Satlength=25026 Nr of Repeats=1238  
RepeatLength=20 seed=GCTATATCGT Num.seqs=1039 Similarity=0.874603  
9 CGATATAGCTATTTACGATA  
Rev.of\_WB235\_6:7077538-7079254 Satlength=1717 Nr of Repeats=55  
RepeatLength=20 seed=TCGTTTATAG Num.seqs=33 Similarity=0.899747  
18 CGACACAGCTATAAACGACA

\*\*\* \* \*\*\*\*\* \* \* \*

Consensus:

CGAtAtAGCTATtaACGAtA

>WB235\_Fam\_104\_16\_3 Nr. of seq. 3 Alignment length(with gaps) = 16  
Alignment score = 0.777778  
WB235\_1:749263-749839 Satlength=577 Nr of Repeats=36 RepeatLength=16  
seed=TTTCAGGCTT Num.seqs=36 Similarity=0.942460  
0 TTTCAGGCTTTTCAGGC  
WB235\_5:17629258-17629682 Satlength=425 Nr of Repeats=26 RepeatLength=16  
seed=CCAGGGTTCC Num.seqs=25 Similarity=1.000000  
2 TTCCAGGGTTCCAGGG  
WB235\_5:17629258-17630037 Satlength=780 Nr of Repeats=29 RepeatLength=16  
seed=CCAGGGTTCC Num.seqs=27 Similarity=0.987654  
2 TTCCAGGGTTCCAGGG

\*\* \*\*\*\* \*\* \*\*\*\*

Consensus:

TTcCAGGgTTcCAGGg

>WB235\_Fam\_105\_11\_3 Nr. of seq. 3 Alignment length(with gaps) = 12  
Alignment score = 0.787037  
WB235\_3:8897677-8897798 Satlength=122 Nr of Repeats=11 RepeatLength=11  
seed=ATT-TGGAATAT Num.seqs=11 Similarity=0.903030  
0 ATT-TGGAATAT  
WB235\_4:10984356-10985109 Satlength=754 Nr of Repeats=4 RepeatLength=11  
seed=TTTGAAATAT Num.seqs=3 Similarity=1.000000  
1 ATT-TGAAATAT



Rev.of\_WB235\_4:6469806-6469955 Satlength=150 Nr of Repeats=10  
RepeatLength=12 seed=CAGAAATATAT Num.seqs=7 Similarity=0.915344  
6 ATTCTGGAATAT

\*\*\* \*\* \*\*\*\*\*

Consensus:

ATTTGgAATAT

>WB235\_Fam\_106\_11\_3 Nr. of seq. 3 Alignment length(with gaps) = 12  
Alignment score = 0.722222

WB235\_4:5690583-5690638 Satlength=56 Nr of Repeats=5 RepeatLength=11  
seed=TCCACTGACC Num.seqs=5 Similarity=0.951515

0 TCCACTGACCA-

WB235\_2:6296590-6296638 Satlength=49 Nr of Repeats=4 RepeatLength=12  
seed=CCACTGACCA Num.seqs=4 Similarity=0.944444

1 CCCACTGACCAT

Rev.of\_WB235\_6:13775030-13775085 Satlength=56 Nr of Repeats=5  
RepeatLength=11 seed=GTGCTTGGTC Num.seqs=5 Similarity=0.951515

5 AGCACTGACCA-

\*\*\*\*\*

Consensus:

ncCACTGACCA

>WB235\_Fam\_107\_10\_3 Nr. of seq. 3 Alignment length(with gaps) = 10  
Alignment score = 0.733333

WB235\_2:7450879-7451382 Satlength=504 Nr of Repeats=27 RepeatLength=10  
seed=TCCATCCCCGA Num.seqs=19 Similarity=0.831650

0 TCCATCCCCGA

Rev.of\_WB235\_6:16884509-16885875 Satlength=1367 Nr of Repeats=37  
RepeatLength=10 seed=TGGATCGGGA Num.seqs=23 Similarity=0.908300

4 TCCATCCCCGA

WB235\_6:15470071-15470810 Satlength=740 Nr of Repeats=22 RepeatLength=10  
seed=TATCTAGATC Num.seqs=15 Similarity=0.964444

2 TCTATCTAGA

\*\* \*\*\* \*\*

Consensus:

TCcATCccGA

>WB235\_Fam\_108\_177\_2 Nr. of seq. 2 Alignment length(with gaps) = 177  
Alignment score = 1.000000

WB235\_5:2389657-2390366 Satlength=710 Nr of Repeats=4 RepeatLength=177  
seed=GAGTCTCACG Num.seqs=3 Similarity=0.943196

0

GAGTCTCACGATGTGTCAACGTGTCTCAGTCGGCTTGATCTACGTAGATCTACAAAAAATGCGGGAGAAGAGA  
CGCAGACTTATTCTCTGATTTTGCATGAGTAAGAGCGTGCTGGCGTCACATTTTTGTGCGCAAAAAATTCCCG  
CATTTTTTTGTAGATCAAACCGTAATGGGACG

WB235\_5:2497936-2498645 Satlength=710 Nr of Repeats=4 RepeatLength=177  
seed=GAGTCTCACG Num.seqs=3 Similarity=0.943196

0



GCcacCcTTAAcCCTAAcCCAaGCAGAGCAGGaTGTAGGCCTGaaAcGcGGTaGcgAcaCaaTCAaGCCcAAc  
AacCaGGGaTGAGGGCCGCAGGCCCGaaaaACTCTTaGAAACTgTaG

>WB235\_Fam\_111\_110\_2 Nr. of seq. 2 Alignment length(with gaps) = 110  
Alignment score = 0.745455  
WB235\_6:11688529-11688958 Satlength=430 Nr of Repeats=4 RepeatLength=108  
seed=TTTCACGTTT Num.seqs=3 Similarity=0.860082  
0 TTTCACGTTTTTCAGGTGATTATCTAGGTCACGAACCTAATTTATTTTGAAAATTGACCT--  
GTGGACCTATAACTTTGGAGATATGGGAAATTGAGTATGGGCTTTCAGAT  
WB235\_6:13242451-13244463 Satlength=2013 Nr of Repeats=18  
RepeatLength=108 seed=TTTCAGATTT Num.seqs=17 Similarity=0.875000  
100 TTTCACATTTTCACTTGATTATATAGGTCACGACCCAAATTATTTTGAAAATTGAGCTACACGG--  
CTGTAACTTTGGAGCTATGGGTAATCAAGTATGAGCTTTCAGAT

\*\*\*\*\*  
\*\*\*\*\*

Consensus:

TTTCACaTTTTCacgTGATTATaTAGGTCACGAaCcAAaTTATTTTGAAAATTGAcCTacacGGacCTaTAAC  
TTTGAGaTaTGGGaATcaAGTATGaGCTTTCAGAT

>WB235\_Fam\_112\_86\_2 Nr. of seq. 2 Alignment length(with gaps) = 86  
Alignment score = 0.689922  
WB235\_2:5073308-5077334 Satlength=4027 Nr of Repeats=52 RepeatLength=76  
seed=TGTATTTTGA Num.seqs=36 Similarity=0.973545  
0 TGTATTTTGAAAGGTCATCTCAATA--GAAAAGATGGAAGACTAC--AG--AA--A-AA-  
CTATTGAGAGACCCCGAAATACTGGC  
Rev.of\_WB235\_2:8975477-8977487 Satlength=2011 Nr of Repeats=24  
RepeatLength=86 seed=AGCCAGTATT Num.seqs=23 Similarity=0.984619  
1  
TGTATTTTGAAAGGTCGTGGCAATAGGGAAAAGATGGAAGAGTTCGAAGTTAACGAGAAGCTATTGCCAGACC  
CCGAAATACTGGC

\*\*\*\*\*  
\*\*\*\*\*

Consensus:

TGTATTTTGAAAGGTCaTcgCAATAggGAAAAGATGGAAGAcTaCgaAGttAAcgAgAAgCTATTGacAGACC  
CCGAAATACTGGC

>WB235\_Fam\_113\_73\_2 Nr. of seq. 2 Alignment length(with gaps) = 73  
Alignment score = 0.945205  
WB235\_1:12192426-12192752 Satlength=327 Nr of Repeats=4 RepeatLength=73  
seed=AATAAAATAT Num.seqs=3 Similarity=0.963470  
0  
AATAAAATATTGGAATCCCTATGACACACTTAAGCCTAAAGGCCCGAAAAACATACTAGGATGCCCAACTGG  
Rev.of\_WB235\_5:15525755-15526135 Satlength=381 Nr of Repeats=5  
RepeatLength=73 seed=TTAGGCTTAA Num.seqs=3 Similarity=0.939117  
40  
AATAAAATATTGGAATCCCTTATGACACACTTAAGCCTAAAGGCCCGAAAAAAACTAGGATGCCCAACTGG

\*\*\*\*\*  
Consensus:

AATAAAATATTGGAAATCCcTATGACACACTTAAGCCTAAAGGCCCGAAAAAaAaACTAGGATGCCCAACTGG

>WB235\_Fam\_114\_44\_2 Nr. of seq. 2 Alignment length(with gaps) = 44  
Alignment score = 0.681818  
WB235\_2:9693772-9694139 Satlength=368 Nr of Repeats=4 RepeatLength=42  
seed=CAGCCGACAG Num.seqs=3 Similarity=0.533769  
0 -CAGCCGACAGCCGAAAAATT--GGAATTTTCGGCTGGTAGCAC  
WB235\_5:4029541-4030122 Satlength=582 Nr of Repeats=5 RepeatLength=42  
seed=CCAGCCGACA Num.seqs=3 Similarity=0.684755  
0 CCAGCCGACAGCCGAAATTTTCACG-ATTTTCGGCTGGTNGCG-

\*\*\*\*\* \*\* \* \*\*\*\*\* \*\*  
Consensus:

cCAGCCGACAGCCGAAAAaTTcacGaATTTTCGGCTGGTaGCac

>WB235\_Fam\_115\_44\_2 Nr. of seq. 2 Alignment length(with gaps) = 44  
Alignment score = 0.704545  
WB235\_1:11829562-11829989 Satlength=428 Nr of Repeats=5 RepeatLength=42  
seed=TCGGCAAATC Num.seqs=3 Similarity=0.723514  
0 TCGGCAAA-TCGGCAATTNCTGGTTTTTTTNAa-ATTTGCCGAGC  
Rev.of\_WB235\_4:15776137-15776526 Satlength=390 Nr of Repeats=5  
RepeatLength=42 seed=GCTCGGCAAA Num.seqs=3 Similarity=0.957672  
0 ACGGCAAATTCGGCAAAT-CT-CTTTTTTCAATATTTGCCGAGC

\*\*\*\*\* \*\*\*\*\* \* \*\* \*\*\*\*\* \*\* \*\*\*\*\*  
Consensus:

aCGGCAAAaTCGGCAAATnCTGcTTTTTTTcAaATTTGCCGAGC

>WB235\_Fam\_116\_44\_2 Nr. of seq. 2 Alignment length(with gaps) = 44  
Alignment score = 0.969697  
WB235\_1:9636862-9637728 Satlength=867 Nr of Repeats=20 RepeatLength=44  
seed=CTGTTTTCTG Num.seqs=18 Similarity=0.984749  
0 CTGTTTTCTGAGCATTTTAGATTTTCGGATTGATGGCCGAAAGG  
WB235\_4:17128248-17129128 Satlength=881 Nr of Repeats=20 RepeatLength=44  
seed=GATTGATGGC Num.seqs=20 Similarity=0.962360  
27 CTGTTTTCTGAGCATTGTAGATTTTCGGATTGATGGCCGAAAGG

\*\*\*\*\* \*\*\*\*\*  
Consensus:

CTGTTTTCTGAGCATTgTAGATTTTCGGATTGATGGCCGAAAGG

>WB235\_Fam\_117\_41\_2 Nr. of seq. 2 Alignment length(with gaps) = 41  
Alignment score = 0.711382  
WB235\_6:17125270-17125459 Satlength=190 Nr of Repeats=5 RepeatLength=38  
seed=CCGTTTCGCC Num.seqs=4 Similarity=0.982456  
0 CCGTTTCGCCCTTGAGCGATT-C--ACCCTTAAATGGGCCTC  
WB235\_6:7351473-7361391 Satlength=9919 Nr of Repeats=248 RepeatLength=40  
seed=AATGGGCGCC Num.seqs=247 Similarity=0.954892  
30 -GGTTTCGCTTTGAGCGATTTCCTTACCCTTAAATGGGCGCC

\*\*\*\*\* \* \*\*\*\*\* \*

Consensus:

ccGTTTCGCcTTGAGCGATTcCttACCCTTAAATGGGCccC

>WB235\_Fam\_118\_41\_2 Nr. of seq. 2 Alignment length(with gaps) = 41  
Alignment score = 1.000000

WB235\_2:7379726-7379898 Satlength=173 Nr of Repeats=4 RepeatLength=41

seed=AAAACGGGAA Num.seqs=3 Similarity=0.978320

0 AAAACGGGAAAACGGGAATTCCCGTTCCCGTGAAAATTTTA

WB235\_2:7379725-7380258 Satlength=534 Nr of Repeats=10 RepeatLength=41

seed=AAAAACGGGA Num.seqs=6 Similarity=0.956640

40 AAAACGGGAAAACGGGAATTCCCGTTCCCGTGAAAATTTTA

\*\*\*\*\*

Consensus:

AAAACGGGAAAACGGGAATTCCCGTTCCCGTGAAAATTTTA

>WB235\_Fam\_119\_40\_2 Nr. of seq. 2 Alignment length(with gaps) = 40  
Alignment score = 0.975000

WB235\_3:1056939-1057667 Satlength=729 Nr of Repeats=14 RepeatLength=40

seed=AAAATCCACG Num.seqs=12 Similarity=0.883838

0 AAAATCCACGTAGATTATTGATTTTTTCATNGAATTTTGCA

WB235\_3:1056932-1058332 Satlength=1401 Nr of Repeats=16 RepeatLength=40

seed=TTTTGCAAAA Num.seqs=11 Similarity=0.759596

33 AAAATCCACGTAGATTATTGATTTTTTCATGGAATTTTGCA

\*\*\*\*\*

Consensus:

AAAATCCACGTAGATTATTGATTTTTTCATgGAATTTTGCA

>WB235\_Fam\_120\_39\_2 Nr. of seq. 2 Alignment length(with gaps) = 39  
Alignment score = 0.897436

WB235\_4:11072392-11075919 Satlength=3528 Nr of Repeats=90 RepeatLength=39

seed=TTATGGAAAA Num.seqs=86 Similarity=0.949069

0 TTATGGAAAAGTGGCTCTAGAGCCACAAGAAATACCAGT

WB235\_5:10605694-10612481 Satlength=6788 Nr of Repeats=174

RepeatLength=39 seed=GGCCACCAGA Num.seqs=173 Similarity=0.944141

20 TTATGAAAAAGTGGCTCTAGGGCCACCAGAAATACCAGT

\*\*\*\*\*

Consensus:

TTATGaAAAAGTGGCTCTAGaGCCACaAGAAATACCAGT

>WB235\_Fam\_121\_36\_2 Nr. of seq. 2 Alignment length(with gaps) = 36  
Alignment score = 0.601852

WB235\_4:3291067-3291207 Satlength=141 Nr of Repeats=5 RepeatLength=33

seed=CGGCATATGC Num.seqs=3 Similarity=0.946128

0 CGGCATA-TGCCGTGAATTTTAAAAT-CGGCATAA-

Rev.of\_WB235\_4:15517213-15517493 Satlength=281 Nr of Repeats=8  
RepeatLength=35 seed=TTGCCGGATT Num.seqs=8 Similarity=0.983673  
32 -GGCAAATTACCATAAATTTTCAAATCCGGCAAAAC

\*\*\*\* \* \* \* \* \* \*\*\*\*\* \*\*\*\* \* \*

Consensus:

cGGCAaAtTaCCaTaAATTTTaAAATcCGGCAaAAc

>WB235\_Fam\_122\_34\_2 Nr. of seq. 2 Alignment length(with gaps) = 34  
Alignment score = 0.612745

WB235\_4:1515989-1516221 Satlength=233 Nr of Repeats=8 RepeatLength=29  
seed=CCACCCGGGA Num.seqs=8 Similarity=0.850575

0 CCACCCGGGAGGTGTCGGCTGCT---CTA-AAC

WB235\_5:18577906-18578272 Satlength=367 Nr of Repeats=11 RepeatLength=33  
seed=TGTCGGCTGC Num.seqs=10 Similarity=0.876094

11 -CTCCCGGCAGGTGTCGGCTGCTAAACTATAGC

\* \*\*\*\*\* \*\*\*\*\* \*\*\*\* \* \*

Consensus:

cCaCCCGGcAGGTGTCGGCTGCTaaaaCTAtAaC

>WB235\_Fam\_123\_32\_2 Nr. of seq. 2 Alignment length(with gaps) = 32  
Alignment score = 0.671875

WB235\_3:255029-255455 Satlength=427 Nr of Repeats=12 RepeatLength=30  
seed=TTTTTTGAGC Num.seqs=9 Similarity=0.761574

0 TTTTTTGAGCCAAAAATTC-AAAAAT-CTCG

WB235\_3:244458-244613 Satlength=156 Nr of Repeats=4 RepeatLength=31  
seed=AGCTCAAAAT Num.seqs=3 Similarity=0.711806

6 -TTTTTGAGCTCAAAATTCTGAAAAATGCTCA

\*\*\*\*\* \*\*\*\*\* \*\*\*\*\* \*\*\*

Consensus:

tTTTTTGAGCcAAAAATTCTaAAAAATgCTCa

>WB235\_Fam\_124\_32\_2 Nr. of seq. 2 Alignment length(with gaps) = 32  
Alignment score = 1.000000

WB235\_1:10945938-10952999 Satlength=7062 Nr of Repeats=238  
RepeatLength=32 seed=GCACCAAATA Num.seqs=152 Similarity=0.889392

0 GCACCAAATAGCACCAATTTAGCACCGATGGA

Rev.of\_WB235\_6:12276852-12278772 Satlength=1921 Nr of Repeats=55  
RepeatLength=32 seed=GGTGCTATTT Num.seqs=46 Similarity=0.867432

15 GCACCAAATAGCACCAATTTAGCACCGATGGA

\*\*\*\*\*

Consensus:

GCACCAAATAGCACCAATTTAGCACCGATGGA

>WB235\_Fam\_125\_31\_2 Nr. of seq. 2 Alignment length(with gaps) = 31  
Alignment score = 0.752688

WB235\_1:1503613-1504297 Satlength=685 Nr of Repeats=18 RepeatLength=31  
seed=GGT TACTGT A Num.seqs=11 Similarity=0.738025  
0 GGT TACTGT AACTCAATTATAGGATACTTNG  
WB235\_2:3496033-3496764 Satlength=732 Nr of Repeats=18 RepeatLength=31  
seed=GGT TACTGT A Num.seqs=11 Similarity=0.669318  
0 GGT TACTGT AGATCGATCCTAGGATACTTTG

\*\*\*\*\* \*\* \*\* \*\*\*\*\* \*  
Consensus:

GGT TACTGT AaaTCaATcaTAGGATACTTtG

>WB235\_Fam\_126\_31\_2 Nr. of seq. 2 Alignment length(with gaps) = 31  
Alignment score = 0.784946  
WB235\_2:2577037-2578087 Satlength=1051 Nr of Repeats=24 RepeatLength=31  
seed=CTGAAATTCC Num.seqs=16 Similarity=0.855556  
0 CTGAAATTCCAATTTTCCAGTGTA AAAATGT  
WB235\_5:18737977-18738195 Satlength=219 Nr of Repeats=6 RepeatLength=31  
seed=TGTA AAAATG Num.seqs=5 Similarity=0.651613  
20 CTGAAATTATGAATTTCCAATGT AAAATGT

\*\*\*\*\* \* \*\*\*\*\* \*\*\*\*\*  
Consensus:

CTGAAATTacaAaTTTCCAaTGTA AAAATGT

>WB235\_Fam\_127\_31\_2 Nr. of seq. 2 Alignment length(with gaps) = 31  
Alignment score = 0.956989  
WB235\_4:15784879-15785128 Satlength=250 Nr of Repeats=6 RepeatLength=31  
seed=TCGACAGAAG Num.seqs=4 Similarity=0.665825  
0 TCGACAGAAGCTGTCTGGAAATCACACTTTCC  
WB235\_6:12606642-12606920 Satlength=279 Nr of Repeats=9 RepeatLength=31  
seed=TCGACAGAAG Num.seqs=8 Similarity=0.729437  
0 TCGACAGAAGCTGTCTGGACATCACACTTTCC

\*\*\*\*\* \*\*\*\*\*  
Consensus:

TCGACAGAAGCTGTCTGGAAATCACACTTTCC

>WB235\_Fam\_128\_29\_2 Nr. of seq. 2 Alignment length(with gaps) = 29  
Alignment score = 1.000000  
WB235\_1:5152583-5153888 Satlength=1306 Nr of Repeats=45 RepeatLength=29  
seed=AAGGATTTCC Num.seqs=45 Similarity=0.955138  
0 AAGGATTTCCCACTATGTCAATACATTGT  
Rev.of\_WB235\_5:7988900-7991510 Satlength=2611 Nr of Repeats=90  
RepeatLength=29 seed=CATAGTGGA Num.seqs=90 Similarity=0.932705  
17 AAGGATTTCCCACTATGTCAATACATTGT

\*\*\*\*\*  
Consensus:

AAGGATTTCCCACTATGTCAATACATTGT

>WB235\_Fam\_129\_27\_2 Nr. of seq. 2 Alignment length(with gaps) = 27  
Alignment score = 0.901235  
WB235\_2:3102561-3102723 Satlength=163 Nr of Repeats=6 RepeatLength=27  
seed=GCTGCTGGAG Num.seqs=6 Similarity=0.881481  
0 GCTGCTGGAGGATCCACTGCATCAACT  
WB235\_2:3106228-3107119 Satlength=892 Nr of Repeats=33 RepeatLength=27  
seed=GCTGCTGGAG Num.seqs=33 Similarity=0.919285  
0 GCTGCTGGAGGATCAACTGCATCAACC

\*\*\*\*\*

Consensus:

GCTGCTGGAGGATCaACTGCATCAACc

>WB235\_Fam\_130\_26\_2 Nr. of seq. 2 Alignment length(with gaps) = 26  
Alignment score = 1.000000  
WB235\_1:1658366-1660394 Satlength=2029 Nr of Repeats=78 RepeatLength=26  
seed=CAAAACCGGC Num.seqs=78 Similarity=0.926569  
0 CAAAACCGGCAATTGCCGAAAATTCC  
Rev.of\_WB235\_1:1807418-1807780 Satlength=363 Nr of Repeats=11  
RepeatLength=26 seed=TTGCCGGTTT Num.seqs=8 Similarity=0.798535  
12 CAAAACCGGCAATTGCCGAAAATTCC

\*\*\*\*\*

Consensus:

CAAAACCGGCAATTGCCGAAAATTCC

>WB235\_Fam\_131\_24\_2 Nr. of seq. 2 Alignment length(with gaps) = 24  
Alignment score = 0.722222  
WB235\_2:3753993-3754089 Satlength=97 Nr of Repeats=4 RepeatLength=24  
seed=TGCATCTGCC Num.seqs=4 Similarity=0.750000  
0 TGCATCTGCCGCTGGAGCTGGCGC  
Rev.of\_WB235\_5:14320937-14321192 Satlength=256 Nr of Repeats=5  
RepeatLength=24 seed=GCCGCTCCAG Num.seqs=3 Similarity=0.814815  
3 GGCATCTGGTGCCGGAGCTGGAGC

\*\*\*\*\* \*\*

Consensus:

gGCATCTGccGCcGGAGCTGGaGC

>WB235\_Fam\_132\_24\_2 Nr. of seq. 2 Alignment length(with gaps) = 24  
Alignment score = 0.680556  
WB235\_2:11365554-11365650 Satlength=97 Nr of Repeats=5 RepeatLength=24  
seed=GCTTAGGCTT Num.seqs=3 Similarity=0.648148  
0 GCTTAGGCTTGGGCTTAGGCTNAA  
Rev.of\_WB235\_5:18797535-18797724 Satlength=190 Nr of Repeats=5  
RepeatLength=24 seed=GCCTAAGCCT Num.seqs=3 Similarity=0.666667  
2 GCCTAGACTCAGGCTTAGGCTTAG

\*\* \*\*\* \*\* \*\*\*\*\* \*

Consensus:



GCcTAGaCTcaGGCTTAGGCTtAa

>WB235\_Fam\_133\_23\_2 Nr. of seq. 2 Alignment length(with gaps) = 23  
Alignment score = 0.630435  
WB235\_1:923168-925176 Satlength=2009 Nr of Repeats=89 RepeatLength=21  
seed=AATTCTAGG Num.seqs=60 Similarity=0.911757  
0 AATTCTAGGCCACGA-TTTGA-  
Rev.of\_WB235\_1:1097742-1098271 Satlength=530 Nr of Repeats=23  
RepeatLength=23 seed=GGCCTAGAAA Num.seqs=23 Similarity=0.818525  
12 TATTCTAGGCCACCACGTTTCAG

\*\*\*\*\* \* \*\* \*  
Consensus:

aAATTCTAGGCCACcAcgTTcAg

>WB235\_Fam\_134\_23\_2 Nr. of seq. 2 Alignment length(with gaps) = 23  
Alignment score = 0.673913  
WB235\_5:19354949-19355211 Satlength=263 Nr of Repeats=11 RepeatLength=21  
seed=TCTAATTAGA Num.seqs=10 Similarity=0.939330  
0 TCTAATTAGAT-CACCTT-TTTT  
WB235\_5:19356787-19357065 Satlength=279 Nr of Repeats=13 RepeatLength=21  
seed=TTCTAATTAG Num.seqs=10 Similarity=0.650000  
20 -CTAATTAGATNCGCCNTCTTTT

\*\*\*\*\* \* \*\* \* \*\*\*\*  
Consensus:

tCTAATTAGATnCaCctTcTTTT

>WB235\_Fam\_135\_23\_2 Nr. of seq. 2 Alignment length(with gaps) = 23  
Alignment score = 0.659420  
WB235\_5:19679307-19679396 Satlength=90 Nr of Repeats=4 RepeatLength=22  
seed=ATTGGATTTT Num.seqs=3 Similarity=0.959596  
0 ATTGGATTTTTTCAACCCAAAAA-  
WB235\_1:623235-624175 Satlength=941 Nr of Repeats=22 RepeatLength=23  
seed=AAAAAAAATT Num.seqs=14 Similarity=0.950948  
16 ATTAAATTTTTCAACAAAAAAA

\*\*\* \*\*\*\*\* \* \*\*\*\*\*  
Consensus:

ATTaaATTTTTTCaAcaAAAAa

>WB235\_Fam\_136\_22\_2 Nr. of seq. 2 Alignment length(with gaps) = 22  
Alignment score = 0.643939  
WB235\_3:1534930-1535260 Satlength=331 Nr of Repeats=16 RepeatLength=20  
seed=CATAAAAATT Num.seqs=13 Similarity=0.947009  
0 CATAAAAAT-TCAGAAAA-ATG  
Rev.of\_WB235\_1:13960468-13960552 Satlength=85 Nr of Repeats=4  
RepeatLength=21 seed=ATATTTGTG Num.seqs=4 Similarity=0.936508  
0 AATAAAAATGTCACAAATAT-

\*\*\*\*\* \*\*\* \*\*\*\* \*\*

Consensus:

aATAAAAAATgTCACAAAAAtATg

>WB235\_Fam\_137\_22\_2 Nr. of seq. 2 Alignment length(with gaps) = 22  
Alignment score = 0.681818  
WB235\_4:1949738-1952318 Satlength=2581 Nr of Repeats=113 RepeatLength=21  
seed=GTAAATCTAC Num.seqs=78 Similarity=0.823929  
0 GTAAATCTACAGTAAT-NCCCC  
WB235\_3:999373-999632 Satlength=260 Nr of Repeats=12 RepeatLength=22  
seed=TAAATCTACA Num.seqs=10 Similarity=0.692929  
1 GTAAATCTACACATAGCCCC

\*\*\*\*\* \*\* \*\*\*\*

Consensus:

GTAAATCTACAcAAATagCCCC

>WB235\_Fam\_138\_22\_2 Nr. of seq. 2 Alignment length(with gaps) = 22  
Alignment score = 0.621212  
WB235\_4:16491101-16491225 Satlength=125 Nr of Repeats=5 RepeatLength=21  
seed=TTCAAGCCTT Num.seqs=3 Similarity=0.915344  
0 TTCAAGCC-TTTTCAGACCAAT  
Rev.of\_WB235\_1:13768184-13768352 Satlength=169 Nr of Repeats=7  
RepeatLength=21 seed=CAAAATTTCGT Num.seqs=6 Similarity=0.814646  
4 TTTGAGCNAATTTTCGGACGAAT

\*\* \*\*\* \*\*\*\*\* \*\*\* \*\*

Consensus:

TTcaAGCcaTTTTCaGACcAAT

>WB235\_Fam\_139\_22\_2 Nr. of seq. 2 Alignment length(with gaps) = 22  
Alignment score = 1.000000  
WB235\_1:13085679-13085769 Satlength=91 Nr of Repeats=4 RepeatLength=22  
seed=TCGAGAAAAA Num.seqs=3 Similarity=1.000000  
0 TCGAGAAAAAATCTGAAAAAAT  
Rev.of\_WB235\_1:13102088-13102201 Satlength=114 Nr of Repeats=5  
RepeatLength=22 seed=TTTTTTCTCG Num.seqs=4 Similarity=1.000000  
11 TCGAGAAAAAATCTGAAAAAAT

\*\*\*\*\*

Consensus:

TCGAGAAAAAATCTGAAAAAAT

>WB235\_Fam\_140\_22\_2 Nr. of seq. 2 Alignment length(with gaps) = 22  
Alignment score = 0.954545  
WB235\_2:3301138-3301263 Satlength=126 Nr of Repeats=4 RepeatLength=22  
seed=ATTCTGCGCA Num.seqs=3 Similarity=0.656566  
0 ATTCTGCGCACCCCCTGCGCNG

Rev.of\_WB235\_5:19315501-19315626 Satlength=126 Nr of Repeats=4  
RepeatLength=22 seed=GTGCGCAGAA Num.seqs=3 Similarity=0.676768  
11 ATTCTGCGCACCCCCTGCGCAG

\*\*\*\*\* \*

Consensus:

ATTCTGCGCACCCCCTGCGCaG

>WB235\_Fam\_141\_20\_2 Nr. of seq. 2 Alignment length(with gaps) = 20  
Alignment score = 0.933333  
WB235\_1:1755610-1758756 Satlength=3147 Nr of Repeats=154 RepeatLength=20  
seed=CCACCAAAAA Num.seqs=145 Similarity=0.874815  
0 CCACCAAAAAGGTTTCTAGG  
WB235\_1:1760846-1762239 Satlength=1394 Nr of Repeats=64 RepeatLength=20  
seed=TTCTAGGCCA Num.seqs=51 Similarity=0.812235  
13 CCACCAAAAATGTTTCTAGG

\*\*\*\*\* \*

Consensus:

CCACCAAAAAGTTTCTAGG

>WB235\_Fam\_142\_20\_2 Nr. of seq. 2 Alignment length(with gaps) = 20  
Alignment score = 0.950000  
WB235\_1:2333731-2334442 Satlength=712 Nr of Repeats=8 RepeatLength=20  
seed=GGACTAGTTT Num.seqs=6 Similarity=0.880000  
0 GGACTAGTTTTCGAGTAGAG  
WB235\_1:2333731-2334603 Satlength=873 Nr of Repeats=11 RepeatLength=20  
seed=GGACTAGTTT Num.seqs=7 Similarity=0.745276  
0 GGACTAGTTTTNGAGTAGAG

\*\*\*\*\* \*

Consensus:

GGACTAGTTTTcGAGTAGAG

>WB235\_Fam\_143\_20\_2 Nr. of seq. 2 Alignment length(with gaps) = 20  
Alignment score = 0.866667  
WB235\_5:2634833-2635037 Satlength=205 Nr of Repeats=7 RepeatLength=20  
seed=CCCCGACGCT Num.seqs=5 Similarity=0.920000  
0 CCCCgACGCTCGAGCTCAAA  
WB235\_5:2634964-2635164 Satlength=201 Nr of Repeats=10 RepeatLength=20  
seed=GCTCGAGCTC Num.seqs=10 Similarity=0.928889  
7 CCCCgAAGCTCGAGCTCAAG

\*\*\*\*\* \*

Consensus:

CCCCGAaGCTCGAGCTCAAA

>WB235\_Fam\_144\_20\_2 Nr. of seq. 2 Alignment length(with gaps) = 20  
Alignment score = 0.800000

WB235\_6:16050430-16050549 Satlength=120 Nr of Repeats=6 RepeatLength=20  
seed=CCACCCTGTA Num.seqs=5 Similarity=0.706349  
0 CCACCCTGTAATATCATGGA  
Rev.of\_WB235\_6:16286380-16286520 Satlength=141 Nr of Repeats=7  
RepeatLength=20 seed=TACAGGGTGG Num.seqs=5 Similarity=0.920000  
10 CCACCCTGTATAATTATGGA

\*\*\*\*\* \*\* \*\*\*\*\*

Consensus:

CCACCCTGTAAaATcATGGA

>WB235\_Fam\_145\_19\_2 Nr. of seq. 2 Alignment length(with gaps) = 19  
Alignment score = 0.684211  
WB235\_2:14105236-14105489 Satlength=254 Nr of Repeats=11 RepeatLength=18  
seed=CTAGGTGCCT Num.seqs=8 Similarity=0.804233  
0 CTAGGTGCCTA-TCCATTC  
Rev.of\_WB235\_4:2861147-2861589 Satlength=443 Nr of Repeats=12  
RepeatLength=19 seed=ACCTAGGCAT Num.seqs=8 Similarity=0.751880  
6 CTAGGTGCCTACTTTATGC

\*\*\*\*\* \* \*\* \*

Consensus:

CTAGGTGCCTAcTccATgC

>WB235\_Fam\_146\_19\_2 Nr. of seq. 2 Alignment length(with gaps) = 19  
Alignment score = 0.929825  
WB235\_4:2650676-2650942 Satlength=267 Nr of Repeats=11 RepeatLength=19  
seed=CGCCAAGTAT Num.seqs=8 Similarity=0.694345  
0 CGCCAAGTATCGAGAAAAG  
Rev.of\_WB235\_5:19372325-19372591 Satlength=267 Nr of Repeats=11  
RepeatLength=19 seed=GATCCTTGGC Num.seqs=9 Similarity=0.898636  
11 CGCCAAGGATCGAGAAAAG

\*\*\*\*\* \*\*\*\*\*

Consensus:

CGCCAAGgATCGAGAAAAG

>WB235\_Fam\_147\_17\_2 Nr. of seq. 2 Alignment length(with gaps) = 17  
Alignment score = 0.656863  
WB235\_2:14738853-14738949 Satlength=97 Nr of Repeats=6 RepeatLength=16  
seed=GCAGTTTGCC Num.seqs=6 Similarity=0.794444  
0 GCAGTTTGCC-GAATTG  
Rev.of\_WB235\_6:16372783-16373033 Satlength=251 Nr of Repeats=11  
RepeatLength=16 seed=TTCCGGCAAT Num.seqs=7 Similarity=0.976190  
13 -CCGATTGCCGGAATTG

\* \* \*\*\*\*\* \*\*\*\*\*

Consensus:

gCaGaTTGCCgGAATTG

>WB235\_Fam\_148\_17\_2 Nr. of seq. 2 Alignment length(with gaps) = 17  
Alignment score = 0.803922  
WB235\_6:6212839-6212968 Satlength=130 Nr of Repeats=8 RepeatLength=16  
seed=GCACTGACAA Num.seqs=7 Similarity=0.876984  
0 GCACTGA-CAATTTTTT  
Rev.of\_WB235\_6:1334194-1334262 Satlength=69 Nr of Repeats=4  
RepeatLength=17 seed=TGGTCAGTGC Num.seqs=4 Similarity=0.882353  
10 GCACTGACCAACTTTTT

\*\*\*\*\* \*\*\* \*\*\*\*\*

Consensus:

GCACTGAcCAAcTTTTT

>WB235\_Fam\_149\_16\_2 Nr. of seq. 2 Alignment length(with gaps) = 16  
Alignment score = 0.750000  
WB235\_5:18410594-18410720 Satlength=127 Nr of Repeats=9 RepeatLength=14  
seed=GTCTGGGGTC Num.seqs=9 Similarity=0.978836  
1 GGT-CTGGGGT-CTGG  
WB235\_5:20524563-20524679 Satlength=117 Nr of Repeats=5 RepeatLength=16  
seed=GTACTAGGGT Num.seqs=3 Similarity=0.888889  
1 GGTACTGGGGTACTGG

\*\* \*\*\*\*\* \*\*\*\*\*

Consensus:

GTaCTGGGGTaCTGGG

>WB235\_Fam\_150\_15\_2 Nr. of seq. 2 Alignment length(with gaps) = 15  
Alignment score = 0.622222  
WB235\_1:11069544-11069616 Satlength=73 Nr of Repeats=6 RepeatLength=12  
seed=CGATCTCCAC Num.seqs=6 Similarity=0.933333  
0 CGAT-CTCCACCA--  
WB235\_1:11060982-11061207 Satlength=226 Nr of Repeats=15 RepeatLength=15  
seed=CGATGCTCCA Num.seqs=15 Similarity=0.900106  
0 CGATGCTCCACCCGA

\*\*\*\* \*\*\*\*\*

Consensus:

CGATgCTCCACCaga

>WB235\_Fam\_151\_14\_2 Nr. of seq. 2 Alignment length(with gaps) = 14  
Alignment score = 0.761905  
WB235\_2:14190380-14191034 Satlength=655 Nr of Repeats=13 RepeatLength=13  
seed=TATACAAAAA Num.seqs=9 Similarity=0.837607  
0 TATACAAAAA-GTA  
Rev.of\_WB235\_1:3712691-3712852 Satlength=162 Nr of Repeats=5  
RepeatLength=14 seed=TTTTTGTAGA Num.seqs=3 Similarity=0.588235  
10 TCTACAAAAANGTA

\* \*\*\*\*\* \*\*\*

Consensus:

TaTACAAAAAnGTA

```
>WB235_Fam_152_14_2  Nr. of seq. 2 Alignment length(with gaps) = 14
Alignment score = 0.666667
WB235_5:1718733-1718863 Satlength=131 Nr of Repeats=9 RepeatLength=13
seed=GCTCAAGCTA  Num.seqs=6 Similarity=0.815385
0      GCTCAAGC-TAGGA
WB235_6:1850672-1850839 Satlength=168 Nr of Repeats=11 RepeatLength=14
seed=TAGGCCCTCA  Num.seqs=8 Similarity=0.823129
9      CCTCAAGCGTAGGC
```

\*\*\*\*\* \*\*\*\*
Consensus:

cCTCAAGCgTAGGa

```
>WB235_Fam_153_14_2  Nr. of seq. 2 Alignment length(with gaps) = 14
Alignment score = 0.619048
WB235_3:11221697-11221865 Satlength=169 Nr of Repeats=11 RepeatLength=14
seed=GATAATTGAA  Num.seqs=10 Similarity=0.980952
0      GATAATTGAAAATC
Rev.of_WB235_3:11399826-11400260 Satlength=435 Nr of Repeats=31
RepeatLength=14 seed=AATTATAAAT  Num.seqs=31 Similarity=0.976651
0      TATAATTTATAATT
```

\*\*\*\*\* \* \*\*\*
Consensus:

gATAATTgAaAATc

```
>WB235_Fam_154_11_2  Nr. of seq. 2 Alignment length(with gaps) = 11
Alignment score = 0.878788
WB235_1:2650538-2650582 Satlength=45 Nr of Repeats=4 RepeatLength=11
seed=AAACTTGGGC  Num.seqs=4 Similarity=0.770833
0      AAACTTGGGCT
WB235_3:11027127-11027171 Satlength=45 Nr of Repeats=4 RepeatLength=11
seed=AAACTTGGGC  Num.seqs=4 Similarity=0.858586
0      AAACTTGGGCA
```

\*\*\*\*\*
Consensus:

AAACTTGGGCa

```
>WB235_Fam_155_11_2  Nr. of seq. 2 Alignment length(with gaps) = 11
Alignment score = 0.636364
WB235_2:13372106-13372150 Satlength=45 Nr of Repeats=4 RepeatLength=11
seed=TGGAAAATTG  Num.seqs=4 Similarity=1.000000
0      TGGAAAATTGA
WB235_3:7593704-7593825 Satlength=122 Nr of Repeats=11 RepeatLength=11
seed=CGGATAATTA  Num.seqs=11 Similarity=1.000000
0      CGGATAATTAA
```

\*\*\* \*\*\*\* \*

Consensus:

cGGAAaAATTaA

>WB235\_Fam\_156\_11\_2 Nr. of seq. 2 Alignment length(with gaps) = 11  
Alignment score = 0.636364

WB235\_6:404178-404266 Satlength=89 Nr of Repeats=7 RepeatLength=11  
seed=CATAACTGAG Num.seqs=6 Similarity=1.000000

0 CATAACTGAGA

Rev.of\_WB235\_6:3365934-3366110 Satlength=177 Nr of Repeats=12  
RepeatLength=11 seed=TAGCTCAGCT Num.seqs=8 Similarity=0.883117  
2 TATAGCTGAGC

\*\*\* \*\*\*\*

Consensus:

cATAaCTGAGa

>WB235\_Fam\_157\_255\_1 Nr. of seq. 1 Alignment length(with gaps) = 255  
Alignment score = 0.000000

WB235\_5:17522891-17524718 Satlength=1828 Nr of Repeats=7 RepeatLength=255  
seed=AACAAGTCGG Num.seqs=5 Similarity=0.720930

0

AACAAGTCGGGAACGTTTCGGAAGCTCTGAGGAAAACCTCCGACAATATCATGCTTAAGTACGCAATTGAGCTA  
TCTTTATTAGATTTCGAAAAAGGACTCTTCAAAAATTGAAGCAATAACGAAGAAGCTTAAGTTGGAAGTGGCGA  
AGCTTAAATTGGGANTTATGCAGTCTTTATCAGATTCAAAAAGACGATTCTTCGACCAATGAAGCAAGTCCGGA  
GNACGATCTACCTTCGACTTCTGATGGCAGAACTCC

\*\*\*\*\*  
\*\*\*\*\*  
\*\*\*\*\*  
\*\*\*\*\*

Consensus:

AACAAGTCGGGAACGTTTCGGAAGCTCTGAGGAAAACCTCCGACAATATCATGCTTAAGTACGCAATTGAGCTA  
TCTTTATTAGATTTCGAAAAAGGACTCTTCAAAAATTGAAGCAATAACGAAGAAGCTTAAGTTGGAAGTGGCGA  
AGCTTAAATTGGGANTTATGCAGTCTTTATCAGATTCAAAAAGACGATTCTTCGACCAATGAAGCAAGTCCGGA  
GNACGATCTACCTTCGACTTCTGATGGCAGAACTCC

>WB235\_Fam\_158\_230\_1 Nr. of seq. 1 Alignment length(with gaps) = 230  
Alignment score = 0.000000

WB235\_1:10266294-10276924 Satlength=10631 Nr of Repeats=46  
RepeatLength=231 seed=GCTGAATTCA Num.seqs=45 Similarity=0.806912

0

GCTGAATTCAAGTTGGGTANGATGTGACTTCATGGCTGAGTGGAATATCTTGAAGTTATCAGCACGATGTGTAG  
AGTCGAGTGGTCCATCGTATTGTTTCAGAAATTGGATAATCAAGATGAGATGGAGATTTCTTGAACAATCCAGT  
GATCTTCGATTTCAATGATGGCTCGTCCTTCTTCTGTCTCTTCAATCACAACCTGGGATGACATGCTCTGGC  
AGCTTCTCATA

\*\*\*\*\*  
\*\*\*\*\*

\*\*\*\*\*  
\*\*\*\*\*

Consensus:

GCTGAATTCA GTTGGGTANGATGTGACTTCATGGCTGAGTGGAATATCTTGAAGTTATCAGCACGATGTGTAG  
AGTCGAGTGGTCCATCGTATTGTTTCAGAAATTGGATAATCAAGATGAGATGGAGATTTCTTGAACAATCCAGT  
GATCTTCGATTTCAATGATGGCTCGTCCTTCTTCTGTCTCTTCAATCACAACTGGGATGACATGCTCTGGC  
AGCTTCTCATA

>WB235\_Fam\_159\_228\_1 Nr. of seq. 1 Alignment length(with gaps) = 228

Alignment score = 0.000000

WB235\_3:5941097-5943578 Satlength=2482 Nr of Repeats=10 RepeatLength=228

seed=CCACCAGATC Num.seqs=6 Similarity=0.843765

0

CCACCAGATCAGCAACGTCTCATCTTCGCCGGAAGCAACTCGAGGACGGCCGCACCCTTTCGGACTACAACA  
TCCAGAAGGAATCAACTCTTCATTTGGTTCTCCGTCTGAGAGGAGGTATGCAGATCTTCGTCAAGACATTGAC  
CGGAAAGACCATCACCTCGAAGTCGAAGCCTCCGACACCATCGAAAATGTCAAGGCCAAGATCCAAGACAAG  
GAAGGAATC

\*\*\*\*\*  
\*\*\*\*\*  
\*\*\*\*\*  
\*\*\*\*\*

Consensus:

CCACCAGATCAGCAACGTCTCATCTTCGCCGGAAGCAACTCGAGGACGGCCGCACCCTTTCGGACTACAACA  
TCCAGAAGGAATCAACTCTTCATTTGGTTCTCCGTCTGAGAGGAGGTATGCAGATCTTCGTCAAGACATTGAC  
CGGAAAGACCATCACCTCGAAGTCGAAGCCTCCGACACCATCGAAAATGTCAAGGCCAAGATCCAAGACAAG  
GAAGGAATC

>WB235\_Fam\_160\_189\_1 Nr. of seq. 1 Alignment length(with gaps) = 189

Alignment score = 0.000000

WB235\_1:1593120-1594195 Satlength=1076 Nr of Repeats=5 RepeatLength=189

seed=TTTTTTTGA Num.seqs=3 Similarity=1.000000

0

TTTTTTTTTGA CTATGGAATTATAAAGAAAATCGAATTTCAAAAAAGCATGTATTAGCCAATGTAAACGCGCTC  
CAATGATGATGTAGCCACGTGGTATCAGAGTGTCTCTTTACGGCTTGATTTAAATACGTAGATCTACAAATT  
CACTTATCTGTTTTCTCACGGGTTTAGGATATTTTTTCTGTTA

\*\*\*\*\*  
\*\*\*\*\*  
\*\*\*\*\*

Consensus:

TTTTTTTTTGA CTATGGAATTATAAAGAAAATCGAATTTCAAAAAAGCATGTATTAGCCAATGTAAACGCGCTC  
CAATGATGATGTAGCCACGTGGTATCAGAGTGTCTCTTTACGGCTTGATTTAAATACGTAGATCTACAAATT  
CACTTATCTGTTTTCTCACGGGTTTAGGATATTTTTTCTGTTA

>WB235\_Fam\_161\_184\_1 Nr. of seq. 1 Alignment length(with gaps) = 184

Alignment score = 0.000000

WB235\_2:884525-885363 Satlength=839 Nr of Repeats=4 RepeatLength=184

seed=GTTCAAAAGA Num.seqs=3 Similarity=1.000000

0

GTTCAAAAGATACAAAATTTATCTACACATCTACAAGTTAAACTTGCAACTTAGTTAACCAAATTCAAAAGTT



ATGAGCCGGGGAAC TATAATAACCAACGTTTCACACTAAAAAGCCCAAAAAATTCGAAAATCATTTTTATC  
TCATGACGCGGACAAGCTACAAATGTCTAGTTAGGCTT

\*\*\*\*\*  
\*\*\*\*\*  
\*\*\*\*\*

Consensus:

GTTCAAAAGATACAAAATTTATCTACACATCTACAAGTTAAACTTGCAACTTAGTTAACCAAATTCAAAAGTT  
ATGAGCCGGGGAAC TATAATAACCAACGTTTCACACTAAAAAGCCCAAAAAATTCGAAAATCATTTTTATC  
TCATGACGCGGACAAGCTACAAATGTCTAGTTAGGCTT

>WB235\_Fam\_162\_183\_1 Nr. of seq. 1 Alignment length(with gaps) = 183  
Alignment score = 0.000000  
WB235\_5:19498459-19499190 Satlength=732 Nr of Repeats=4 RepeatLength=183  
seed=TTTCTCTGCG Num.seqs=3 Similarity=0.615789  
0  
TTTCTCTGCGTCTCGCCTCGCCTCACACTATTTTNCACACCAAACCTTGAGNCTATGTATCTCTGTAACGGGT  
TGCGCTTTCTGAAAAATTCCAACTGACGGGATATATAAAATTTNGAATTCTTTCTACCGTTAAAAAACTAAA  
CACCTAGGCAAGACGCAGACAGCGAGANACCCCAAT

\*\*\*\*\*  
\*\*\*\*\*  
\*\*\*\*\*

Consensus:

TTTCTCTGCGTCTCGCCTCGCCTCACACTATTTTNCACACCAAACCTTGAGNCTATGTATCTCTGTAACGGGT  
TGCGCTTTCTGAAAAATTCCAACTGACGGGATATATAAAATTTNGAATTCTTTCTACCGTTAAAAAACTAAA  
CACCTAGGCAAGACGCAGACAGCGAGANACCCCAAT

>WB235\_Fam\_163\_181\_1 Nr. of seq. 1 Alignment length(with gaps) = 181  
Alignment score = 0.000000  
WB235\_2:6073626-6077427 Satlength=3802 Nr of Repeats=21 RepeatLength=181  
seed=TTTTTAACTT Num.seqs=21 Similarity=0.964606  
0  
TTTTTAACTTTTAAATCCACTAAAACTCGGAATGGTACAGAACATGCAAATTGTAATTTCAAGAACTGAATGT  
GGTTTCGAATATTTATGGATTGCTTTATTCTAAAACTGACTCTGAAATATTTTGCATCCATTTGACTACTAAT  
TGT CATATTATACCGAACACTACTA ACTTTAGTGG

\*\*\*\*\*  
\*\*\*\*\*  
\*\*\*\*\*

Consensus:

TTTTTAACTTTTAAATCCACTAAAACTCGGAATGGTACAGAACATGCAAATTGTAATTTCAAGAACTGAATGT  
GGTTTCGAATATTTATGGATTGCTTTATTCTAAAACTGACTCTGAAATATTTTGCATCCATTTGACTACTAAT  
TGT CATATTATACCGAACACTACTA ACTTTAGTGG

>WB235\_Fam\_164\_180\_1 Nr. of seq. 1 Alignment length(with gaps) = 180  
Alignment score = 0.000000  
WB235\_3:2977664-2978383 Satlength=720 Nr of Repeats=4 RepeatLength=180  
seed=TGTCGGCCGC Num.seqs=3 Similarity=0.750153  
0  
TGTCGGCCGCTGTATCTTTTGCCTCAATTTTTTTTNAATTTTNAACATNCATATTCCAGTAGATAACATTAT

GAGCTACAGTTTGTAGTTAAAATTTTATTTCTAAAATTACTAGTTTCTGAGTTATACTCATTCCAACCCACC  
CCAAGAGAAAATTCCTAAAAATGAACTCGCGAGG

\*\*\*\*\*  
\*\*\*\*\*  
\*\*\*\*\*

Consensus:

TGTCGGCCGCTGTATCTTTTGCCTCAATTTTTTTTNAATTTTNAACATNCATATTCCAGTAGATAACATTAT  
GAGCTACAGTTTGTAGTTAAAATTTTATTTCTAAAATTACTAGTTTCTGAGTTATACTCATTCCAACCCACC  
CCAAGAGAAAATTCCTAAAAATGAACTCGCGAGG

>WB235\_Fam\_165\_179\_1 Nr. of seq. 1 Alignment length(with gaps) = 179

Alignment score = 0.000000

WB235\_1:14024312-14025229 Satlength=918 Nr of Repeats=5 RepeatLength=179

seed=CTACCCAAAT Num.seqs=3 Similarity=0.995034

0

CTACCCAAATTTTTGAAATTTGGAAATTTTTCAAAAATTTCTCAAATTTTCAAATCCCATAATTCAGCCAATT  
TTTGAGATTTTCAGATATTTTTTAATTGAAAATTTCTGTTTGTCTTATCCATTAACTATATCGCTGCATCTAC  
ATTTTTCACAGTACCCCATGACTTTTCCCGATT

\*\*\*\*\*  
\*\*\*\*\*  
\*\*\*\*\*

Consensus:

CTACCCAAATTTTTGAAATTTGGAAATTTTTCAAAAATTTCTCAAATTTTCAAATCCCATAATTCAGCCAATT  
TTTGAGATTTTCAGATATTTTTTAATTGAAAATTTCTGTTTGTCTTATCCATTAACTATATCGCTGCATCTAC  
ATTTTTCACAGTACCCCATGACTTTTCCCGATT

>WB235\_Fam\_166\_177\_1 Nr. of seq. 1 Alignment length(with gaps) = 177

Alignment score = 0.000000

WB235\_1:14148103-14148989 Satlength=887 Nr of Repeats=5 RepeatLength=177

seed=CTAACAAAAT Num.seqs=4 Similarity=0.721286

0

CTAACAAAATAATCAGCGTAAATTTTCTACATTTTACTAGTTAACAATATTTTGATAACATCAGTGGTTTTT  
GAGATACGCAAGTTTTAAGGTGGACGCCCAAAAATAGTTGTGAGCAGCTTTAATCAAAAACCGACATAACTTT  
TTACTCACTAACGGTATCAAAAATGTTTTAA

\*\*\*\*\*  
\*\*\*\*\*  
\*\*\*\*\*

Consensus:

CTAACAAAATAATCAGCGTAAATTTTCTACATTTTACTAGTTAACAATATTTTGATAACATCAGTGGTTTTT  
GAGATACGCAAGTTTTAAGGTGGACGCCCAAAAATAGTTGTGAGCAGCTTTAATCAAAAACCGACATAACTTT  
TTACTCACTAACGGTATCAAAAATGTTTTAA

>WB235\_Fam\_167\_175\_1 Nr. of seq. 1 Alignment length(with gaps) = 175

Alignment score = 0.000000

WB235\_1:2430196-2431177 Satlength=982 Nr of Repeats=5 RepeatLength=175

seed=GATGCACCAT Num.seqs=3 Similarity=0.840552

0

GATGCACCATGTCTTTGACAGTCAATATCTCGGTTTATTTTGTAGCTATCAAAAATTTTCAACTACAAATCT

ATAGAAAAATTAAATGTTCAACATTTTCTCAGTTGACAGTTTTTTTGATAACTGCAATGACATCCGAGATATGAG  
CTTTCAAAGTTGAGAGACCTCACTCGGTT

\*\*\*\*\*  
\*\*\*\*\*  
\*\*\*\*\*

Consensus:

GATGCACCATGTCTTTGACAGTCAATATCTCGGTTTATTTTGTAGCTATCAAAAAATTTTCAACTACAAATCT  
ATAGAAAAATTAAATGTTCAACATTTTCTCAGTTGACAGTTTTTTTGATAACTGCAATGACATCCGAGATATGAG  
CTTTCAAAGTTGAGAGACCTCACTCGGTT

>WB235\_Fam\_168\_175\_1 Nr. of seq. 1 Alignment length(with gaps) = 175

Alignment score = 0.000000

WB235\_4:2675283-2676104 Satlength=822 Nr of Repeats=4 RepeatLength=175

seed=AACTTGTGAC Num.seqs=3 Similarity=0.715980

0

AACTTGTGACGGTGGGTATGGATTTTATGCACATAATTTGTTTCGAAATAGTCTACCNAGTAACTGGTGAAGT  
TTCAAAAACTTTGTGGATCTAGTTTTTGA AAAAAGTTCAAAATTTGTGCCAATTTTGACCAATTTTGGTGGTTT  
TCTGAGCTAAAATTGAAAAGTTGGGAATG

\*\*\*\*\*  
\*\*\*\*\*  
\*\*\*\*\*

Consensus:

AACTTGTGACGGTGGGTATGGATTTTATGCACATAATTTGTTTCGAAATAGTCTACCNAGTAACTGGTGAAGT  
TTCAAAAACTTTGTGGATCTAGTTTTTGA AAAAAGTTCAAAATTTGTGCCAATTTTGACCAATTTTGGTGGTTT  
TCTGAGCTAAAATTGAAAAGTTGGGAATG

>WB235\_Fam\_169\_175\_1 Nr. of seq. 1 Alignment length(with gaps) = 175

Alignment score = 0.000000

WB235\_5:317369-318431 Satlength=1063 Nr of Repeats=6 RepeatLength=175

seed=AAATTTTGGG Num.seqs=4 Similarity=0.911111

0

AAATTTTGGGTTCACTCTTTTTACTAGACAGTGATTGTTGCATTGTAGGATTCGGTGGACTTGTCCAACAAC  
TACTTTGGCATGAGTTTAATAAAAAGGTTTTACCATGAACTGAATCAATTCAAATAAAAACCTCGAGAATGA  
AAACATCCTCAGTAATTTCAATCCTGTTC

\*\*\*\*\*  
\*\*\*\*\*  
\*\*\*\*\*

Consensus:

AAATTTTGGGTTCACTCTTTTTACTAGACAGTGATTGTTGCATTGTAGGATTCGGTGGACTTGTCCAACAAC  
TACTTTGGCATGAGTTTAATAAAAAGGTTTTACCATGAACTGAATCAATTCAAATAAAAACCTCGAGAATGA  
AAACATCCTCAGTAATTTCAATCCTGTTC

>WB235\_Fam\_170\_174\_1 Nr. of seq. 1 Alignment length(with gaps) = 174

Alignment score = 0.000000

WB235\_1:4338841-4339537 Satlength=697 Nr of Repeats=4 RepeatLength=174

seed=CTTCAAGAGC Num.seqs=4 Similarity=0.868455

0

CTTCAAGAGCTCAGTGTTATTTATGACATGCCAACCTCGACAATTGACCTGAACATGCTCCAAGGAATCGAAG

ACAACCTTGAACAGCCTTCCAGCTGAAGAATCTGATAAGATCCGAGAGAAGATTAACGATCTGAGAAGAAGGAA  
ACAAGAAAAGCGATCAAGCTGAAGCTCTT

\*\*\*\*\*  
\*\*\*\*\*  
\*\*\*\*\*

Consensus:

CTTCAAGAGCTCAGTGTTATTTATGACATGCCAACCTCGACAATTGACCTGAACATGCTCCAAGGAATCGAAG  
ACAACCTTGAACAGCCTTCCAGCTGAAGAATCTGATAAGATCCGAGAGAAGATTAACGATCTGAGAAGAAGGAA  
ACAAGAAAAGCGATCAAGCTGAAGCTCTT

>WB235\_Fam\_171\_165\_1 Nr. of seq. 1 Alignment length(with gaps) = 165  
Alignment score = 0.000000  
WB235\_6:1718471-1719647 Satlength=1177 Nr of Repeats=4 RepeatLength=165  
seed=CTTTTCCAAA Num.seqs=3 Similarity=1.000000  
0  
CTTTTCCAAAATGGCAATTTTTGATGAAAAAATCCGAATTTTCACAAATTTCAAAAAATTTTTAAACTTTA  
TAATTTTAGCTTTGAATATTCCAAATGGAAGTGCATAACCTATCAATTTGATATATAAACTCGTGCCTACCT  
TCAGGCATTCAGTTTTTCAC

\*\*\*\*\*  
\*\*\*\*\*  
\*\*\*\*\*

Consensus:

CTTTTCCAAAATGGCAATTTTTGATGAAAAAATCCGAATTTTCACAAATTTCAAAAAATTTTTAAACTTTA  
TAATTTTAGCTTTGAATATTCCAAATGGAAGTGCATAACCTATCAATTTGATATATAAACTCGTGCCTACCT  
TCAGGCATTCAGTTTTTCAC

>WB235\_Fam\_172\_155\_1 Nr. of seq. 1 Alignment length(with gaps) = 155  
Alignment score = 0.000000  
WB235\_2:2949876-2951271 Satlength=1396 Nr of Repeats=9 RepeatLength=155  
seed=TCCCGCTGTG Num.seqs=6 Similarity=0.781691  
0  
TCCCGCTGTGGTTAAAAGTTTTTTCGCTGCTCAGTTCTGTACGGTAAATGTGTTAAAACTTCTGGAACTTG  
AAATTCCAAGTTATTTCAGAAAATTGTTCAAATGGCGCAGTGGGAAATTCGATTTCTCAGACCCAAGAGGCCAC  
GGGTTCAAT

\*\*\*\*\*  
\*\*\*\*\*  
\*\*\*\*\*

Consensus:

TCCCGCTGTGGTTAAAAGTTTTTTCGCTGCTCAGTTCTGTACGGTAAATGTGTTAAAACTTCTGGAACTTG  
AAATTCCAAGTTATTTCAGAAAATTGTTCAAATGGCGCAGTGGGAAATTCGATTTCTCAGACCCAAGAGGCCAC  
GGGTTCAAT

>WB235\_Fam\_173\_153\_1 Nr. of seq. 1 Alignment length(with gaps) = 153  
Alignment score = 0.000000  
WB235\_6:13923839-13924439 Satlength=601 Nr of Repeats=4 RepeatLength=153  
seed=TGAGGTGCAG Num.seqs=3 Similarity=0.872186  
0  
TGAGGTGCAGGGCGTGATGAGCTTTGTTGAACTGGGAACTGTTGATTCCCGGAGCCGTGATTCATAGATGAGT

TGGAGGGACCTGCTGTGGAACCTGTTTCAACTTGAGCAATTCCATGAGCCATCAAGAAGCTTTCGGGCAGATT  
GGGCAAC

\*\*\*\*\*  
\*\*\*\*\*  
\*\*\*\*\*

Consensus:

TGAGGTGCAGGGCGTGATGAGCTTTGTTGAACTGGGAACTGTTGATTCCCGGAGCCGTGATTCATAGATGAGT  
TGGAGGGACCTGCTGTGGAACCTGTTTCAACTTGAGCAATTCCATGAGCCATCAAGAAGCTTTCGGGCAGATT  
GGGCAAC

>WB235\_Fam\_174\_151\_1 Nr. of seq. 1 Alignment length(with gaps) = 151  
Alignment score = 0.000000  
WB235\_5:14053790-14054393 Satlength=604 Nr of Repeats=4 RepeatLength=151  
seed=CATTTTCAGAT Num.seqs=3 Similarity=0.988227  
0  
CATTTTCAGATATTCATCACCACCAACACCTTCATCCACTTCTTCGCCTGGAACGACGGGATTTTCTACAAAA  
ATCGGATTTTTTCTCTATGTCAGTTTAATTGATGTATAATTCCGAAAAGTCAGTCTTTCCTAGGTTTTTAAAT  
TGAAA

\*\*\*\*\*  
\*\*\*\*\*  
\*\*\*\*\*

Consensus:

CATTTTCAGATATTCATCACCACCAACACCTTCATCCACTTCTTCGCCTGGAACGACGGGATTTTCTACAAAA  
ATCGGATTTTTTCTCTATGTCAGTTTAATTGATGTATAATTCCGAAAAGTCAGTCTTTCCTAGGTTTTTAAAT  
TGAAA

>WB235\_Fam\_175\_150\_1 Nr. of seq. 1 Alignment length(with gaps) = 150  
Alignment score = 0.000000  
WB235\_2:1496871-1497776 Satlength=906 Nr of Repeats=6 RepeatLength=150  
seed=TTGCAACATG Num.seqs=4 Similarity=0.817145  
0  
TTGCAACATGCGGTCGGCGGAAAATTCTGAATTTTTTCAGTCCAAAACAGGTTTTTCGACCAATTTTTTCATATTT  
TCAAGCGAAATTATGATAGAAAATTCAAATTTTCACTAAAAATCGCCAATTTTCCACATTTTCTCATTGGAGC  
GCAC

\*\*\*\*\*  
\*\*\*\*\*  
\*\*\*\*\*

Consensus:

TTGCAACATGCGGTCGGCGGAAAATTCTGAATTTTTTCAGTCCAAAACAGGTTTTTCGACCAATTTTTTCATATTT  
TCAAGCGAAATTATGATAGAAAATTCAAATTTTCACTAAAAATCGCCAATTTTCCACATTTTCTCATTGGAGC  
GCAC

>WB235\_Fam\_176\_150\_1 Nr. of seq. 1 Alignment length(with gaps) = 150  
Alignment score = 0.000000  
WB235\_4:16681092-16681615 Satlength=524 Nr of Repeats=4 RepeatLength=150  
seed=TTGAGGGCCG Num.seqs=3 Similarity=0.940741  
0  
TTGAGGGCCGCAGTCCCGAATACACGAAGAAGTGTGGAGATCCGTCAAGCCTATTCTAAGCATAATAATTCA

GTTTCGAGTGTTCGCAAGCCCAAATAGACGCAGAAGCGTTGGACAACTTTTAGGCCTATTCTGAGCCCAATAATT  
CATG

\*\*\*\*\*  
\*\*\*\*\*  
\*\*\*\*

Consensus:

TTGAGGGCCGCAGTCCCGAATACACGAAGAAGTGTGGAGATCCGTCAAGCCTATTCTAAGCATAATAATTCA  
GTTTCGAGTGTTCGCAAGCCCAAATAGACGCAGAAGCGTTGGACAACTTTTAGGCCTATTCTGAGCCCAATAATT  
CATG

>WB235\_Fam\_177\_146\_1 Nr. of seq. 1 Alignment length(with gaps) = 146  
Alignment score = 0.000000  
WB235\_2:2811262-2812302 Satlength=1041 Nr of Repeats=6 RepeatLength=144  
seed=TGGCCTAGAA Num.seqs=4 Similarity=0.634815  
0  
TGGCCTAGAAATCNCAAGTTTGCAAAAGTTAGGCCACCAACTTCAAATGCCTATAACTCAGCGGAAAATCAAT  
ATTTTCCATTGATTTTAACTGCTAAGATGTAGCCAATTACGTAGCGCAACTTTTTGGCCTACTTAACAATTGG

\*\*\*\*\*  
\*\*\*\*\*  
Consensus:

TGGCCTAGAAATCNCAAGTTTGCAAAAGTTAGGCCACCAACTTCAAATGCCTATAACTCAGCGGAAAATCAAT  
ATTTTCCATTGATTTTAACTGCTAAGATGTAGCCAATTACGTAGCGCAACTTTTTGGCCTACTTAACAATTGG

>WB235\_Fam\_178\_144\_1 Nr. of seq. 1 Alignment length(with gaps) = 144  
Alignment score = 0.000000  
WB235\_4:2431055-2431771 Satlength=717 Nr of Repeats=5 RepeatLength=144  
seed=TTCTAGGCCA Num.seqs=4 Similarity=0.915326  
0  
TTCTAGGCCACCAATTGGAAATCATCATAACTTGGCTTAAAATCCAGATTTTTGGAGTCTGGTAACTGCAACA  
TGTTGCCCTGTAGTTTTTCTACAAGTTAGGATATATTAATTTTTGGTGGCCTAAAAGTCCAAATTATGGAT

\*\*\*\*\*  
\*\*\*\*\*  
Consensus:

TTCTAGGCCACCAATTGGAAATCATCATAACTTGGCTTAAAATCCAGATTTTTGGAGTCTGGTAACTGCAACA  
TGTTGCCCTGTAGTTTTTCTACAAGTTAGGATATATTAATTTTTGGTGGCCTAAAAGTCCAAATTATGGAT

>WB235\_Fam\_179\_143\_1 Nr. of seq. 1 Alignment length(with gaps) = 143  
Alignment score = 0.000000  
WB235\_5:17747299-17748649 Satlength=1351 Nr of Repeats=6 RepeatLength=143  
seed=CAGTGGGATT Num.seqs=4 Similarity=0.759132  
0  
CAGTGGGATTTTCAATGTCTTCCAATCAAACGTCCGGGGTTCGAGTCCGCACAGGGGTATTTATTTTTTGCAA  
GCTGTGATTAACAAGTTTATAGCTGCAAAAGTCATTTTAATCGAACTTTCAGGAAAATGTCCGAATGGCG

\*\*\*\*\*  
\*\*\*\*\*  
Consensus:

CAGTGGGATTTTCAATGTCTTCCAATCAAACGTCCGGGGTTCGAGTCCGCACAGGGGTATTTATTTTTTGCAA  
GCTGTGATTAACAAGTTTATAGCTGCAAAAGTCATTTTAATCGAACTTTCAGGAAAATGTCCGAATGGCG

>WB235\_Fam\_180\_122\_1 Nr. of seq. 1 Alignment length(with gaps) = 122  
Alignment score = 0.000000  
WB235\_2:13334193-13334831 Satlength=639 Nr of Repeats=5 RepeatLength=122  
seed=GATCTACAAA Num.seqs=3 Similarity=0.927140  
0

GATCTACAAAAATGCGGGAAAAGTGACACAGAGTTCTCAACTGATTTTGCATAAAAATTCCCGCATTTTTTGG  
AGATCAAACCGTGATGGGACAGCCTGGCACCACTTGCTTGATCTACGTA

\*\*\*\*\*  
\*\*\*\*\*

Consensus:

GATCTACAAAAATGCGGGAAAAGTGACACAGAGTTCTCAACTGATTTTGCATAAAAATTCCCGCATTTTTTGG  
AGATCAAACCGTGATGGGACAGCCTGGCACCACTTGCTTGATCTACGTA

>WB235\_Fam\_181\_121\_1 Nr. of seq. 1 Alignment length(with gaps) = 121  
Alignment score = 0.000000  
WB235\_5:16449792-16451728 Satlength=1937 Nr of Repeats=16  
RepeatLength=121 seed=AAAAGATAGT Num.seqs=16 Similarity=0.955556  
0

AAAAGATAGTTGCCCTAAGAGCAGAAGGTTGCAAACCGCAAGAGCAAACCTGCCAAATGACAAGCCACCCAAG  
TACTCGTTGCACCTACCTATCATAAGCTCGTAGACTATAATTTCTCTG

\*\*\*\*\*  
\*\*\*\*\*

Consensus:

AAAAGATAGTTGCCCTAAGAGCAGAAGGTTGCAAACCGCAAGAGCAAACCTGCCAAATGACAAGCCACCCAAG  
TACTCGTTGCACCTACCTATCATAAGCTCGTAGACTATAATTTCTCTG

>WB235\_Fam\_182\_117\_1 Nr. of seq. 1 Alignment length(with gaps) = 117  
Alignment score = 0.000000  
WB235\_5:6176242-6183220 Satlength=6979 Nr of Repeats=54 RepeatLength=117  
seed=TGTTGGTTTCG Num.seqs=49 Similarity=0.881703  
0

TGTTGGTTTCGACAGTAGGTGCACTAGTCTCTGGCACTGGAACATCCTTTTGCTCAACAATTTAGCTGGTTGT  
ACTTCAGATGTTTCTTTTGATTCCACAGGTGCAAGTTTCTCAAC

\*\*\*\*\*  
\*\*\*\*\*

Consensus:

TGTTGGTTTCGACAGTAGGTGCACTAGTCTCTGGCACTGGAACATCCTTTTGCTCAACAATTTAGCTGGTTGT  
ACTTCAGATGTTTCTTTTGATTCCACAGGTGCAAGTTTCTCAAC

>WB235\_Fam\_183\_114\_1 Nr. of seq. 1 Alignment length(with gaps) = 114  
Alignment score = 0.000000  
WB235\_5:8705331-8709788 Satlength=4458 Nr of Repeats=38 RepeatLength=114  
seed=GTGTTTCAGA Num.seqs=36 Similarity=0.968737  
0

GTGTTTCAGAATTACATGGAGTCTCACTACTTGCAGAATTTGTGGCTGTAGACGATGGGCCTGCTGTAGTTGA  
ATCGTTTGGAACGTGCATAGTGGATGTTCCATCAGACGTTT

\*\*\*\*\*  
\*\*\*\*\*

Consensus:

GTGTTTCAGAATTACATGGAGTCTCACTACTTGCAGAATTTGTGGCTGTAGACGATGGGCCTGCTGTAGTTGA  
ATCGTTTGGAACGTGCATAGTGGATGTTCCATCAGACGTTT

>WB235\_Fam\_184\_108\_1 Nr. of seq. 1 Alignment length(with gaps) = 108

Alignment score = 0.000000

WB235\_6:1549825-1550305 Satlength=481 Nr of Repeats=5 RepeatLength=108

seed=ATCCTCAACA Num.seqs=3 Similarity=0.732510

0

ATCCTCAACACCATCNGCGTCATCTAGTTCCTCCGGAACATATGTCGACAATTTTCAGGATCAACTGGTTCNACA  
GTTACAGTTGTACCAGGATCNTCTAGCACATTTGG

\*\*\*\*\*  
\*\*\*\*\*

Consensus:

ATCCTCAACACCATCNGCGTCATCTAGTTCCTCCGGAACATATGTCGACAATTTTCAGGATCAACTGGTTCNACA  
GTTACAGTTGTACCAGGATCNTCTAGCACATTTGG

>WB235\_Fam\_185\_108\_1 Nr. of seq. 1 Alignment length(with gaps) = 108

Alignment score = 0.000000

WB235\_6:13684248-13684998 Satlength=751 Nr of Repeats=7 RepeatLength=108

seed=TGGGTAATCA Num.seqs=6 Similarity=0.845267

0

TGGGTAATCAGGTACGGGCTTTCAGATTTTCAAGTTTTCACGTGAATATCTAGGTCACGAGCCAATTTTCAGCC  
AGGAGTGGGACTAGAGATATGAAACTCTTGGGTTA

\*\*\*\*\*  
\*\*\*\*\*

Consensus:

TGGGTAATCAGGTACGGGCTTTCAGATTTTCAAGTTTTCACGTGAATATCTAGGTCACGAGCCAATTTTCAGCC  
AGGAGTGGGACTAGAGATATGAAACTCTTGGGTTA

>WB235\_Fam\_186\_108\_1 Nr. of seq. 1 Alignment length(with gaps) = 108

Alignment score = 0.000000

WB235\_6:15226880-15229061 Satlength=2182 Nr of Repeats=20

RepeatLength=108 seed=AAGTCTTCTT Num.seqs=18 Similarity=0.959655

0

AAGTCTTCTTGATTCTGAGTTCTTGCTTCGAACTGTTGACCATCTCCTTGCAGGATCTTATTGTCAGATGGAA  
CCTTCTTGGCATACCGTTCTCCACTGATGTGAGTG

\*\*\*\*\*  
\*\*\*\*\*

Consensus:

AAGTCTTCTTGATTCTGAGTTCTTGCTTCGAACTGTTGACCATCTCCTTGCAGGATCTTATTGTCAGATGGAA  
CCTTCTTGGCATACCGTTCTCCACTGATGTGAGTG



>WB235\_Fam\_187\_104\_1 Nr. of seq. 1 Alignment length(with gaps) = 104  
Alignment score = 0.000000  
WB235\_4:2397301-2398030 Satlength=730 Nr of Repeats=7 RepeatLength=104  
seed=CCTGCGAAAG Num.seqs=6 Similarity=0.982906  
0  
CCTGCGAAAGCGAATCTCTGGCCTGGCGGAGGGCCAACTAACTCTCTCCCTCAAGCCTTCGGGTGCTTCCTGG  
GTTATCGGTGAATTTTTGGGTCTGTCAGGGT

\*\*\*\*\*  
\*\*\*\*\*

Consensus:

CCTGCGAAAGCGAATCTCTGGCCTGGCGGAGGGCCAACTAACTCTCTCCCTCAAGCCTTCGGGTGCTTCCTGG  
GTTATCGGTGAATTTTTGGGTCTGTCAGGGT

>WB235\_Fam\_188\_102\_1 Nr. of seq. 1 Alignment length(with gaps) = 102  
Alignment score = 0.000000  
WB235\_4:688812-698192 Satlength=9381 Nr of Repeats=92 RepeatLength=102  
seed=TTGCTGCAGC Num.seqs=90 Similarity=0.947271  
0  
TTGCTGCAGCATATCTTTCTCCAGTACCACCTTGATATGTCTGAACGATTGATAGTTTGAGAATCAAGAGAATC  
TGTTGGACGATCAATTCATCTTTGGGTC

\*\*\*\*\*  
\*\*\*\*\*

Consensus:

TTGCTGCAGCATATCTTTCTCCAGTACCACCTTGATATGTCTGAACGATTGATAGTTTGAGAATCAAGAGAATC  
TGTTGGACGATCAATTCATCTTTGGGTC

>WB235\_Fam\_189\_102\_1 Nr. of seq. 1 Alignment length(with gaps) = 102  
Alignment score = 0.000000  
WB235\_6:1136184-1140765 Satlength=4582 Nr of Repeats=45 RepeatLength=102  
seed=TGTACACTTC Num.seqs=30 Similarity=0.981008  
0  
TGTACACTTCTCCCAAATGACTGTAAGAATGGACTCCTTATATGATTTTAAACCCGACTCTGGACATACAAA  
CTTCTCTCAAAAAGAAAATAGACTTCACA

\*\*\*\*\*  
\*\*\*\*\*

Consensus:

TGTACACTTCTCCCAAATGACTGTAAGAATGGACTCCTTATATGATTTTAAACCCGACTCTGGACATACAAA  
CTTCTCTCAAAAAGAAAATAGACTTCACA

>WB235\_Fam\_190\_101\_1 Nr. of seq. 1 Alignment length(with gaps) = 101  
Alignment score = 0.000000  
WB235\_1:14329713-14330118 Satlength=406 Nr of Repeats=4 RepeatLength=101  
seed=GCATTTGCAT Num.seqs=3 Similarity=0.826797  
0  
GCATTTGCATATNGAGATCAGATAAAAGTTAGAATTTTCCAGCCGTTGCAAGTGCGCTCTATTGAGAACATTT  
TGAAAAATTGAATGTTTTACATTAGAGC

\*\*\*\*\*  
\*\*\*\*\*

Consensus:

GCATTTGCATATNGAGATCAGATAAAAGTTAGAATTTTCCAGCCGTTGCAAGTGCCTCTATTGAGAACATTT  
TGAAAATTGAATGTTTTACATTAGAGC

>WB235\_Fam\_191\_101\_1 Nr. of seq. 1 Alignment length(with gaps) = 101  
Alignment score = 0.000000  
WB235\_3:267063-268369 Satlength=1307 Nr of Repeats=13 RepeatLength=101  
seed=GGTTACTGTA Num.seqs=11 Similarity=0.942394

0  
GGTTACTGTAGCTCCAGAAATACGCAAACACCGACTACGGTTCCTAATACATCAGATATTACGACAAAGTGC  
AGAAAATCGCTAAAAATGACTTTACTGG

\*\*\*\*\*  
\*\*\*\*\*

Consensus:

GGTTACTGTAGCTCCAGAAATACGCAAACACCGACTACGGTTCCTAATACATCAGATATTACGACAAAGTGC  
AGAAAATCGCTAAAAATGACTTTACTGG

>WB235\_Fam\_192\_101\_1 Nr. of seq. 1 Alignment length(with gaps) = 101  
Alignment score = 0.000000  
WB235\_4:1569894-1570719 Satlength=826 Nr of Repeats=7 RepeatLength=101  
seed=TTGATTTTTC Num.seqs=5 Similarity=0.952475

0  
TTGATTTTTCGTCTTATGAAGGAATATTGGTTTCGGGGTAGTGGGCGGATATGGTCGGGGTACTGTAGGTATA  
CGGTAGGGTTACTGTAGTTTGGAAATT

\*\*\*\*\*  
\*\*\*\*\*

Consensus:

TTGATTTTTCGTCTTATGAAGGAATATTGGTTTCGGGGTAGTGGGCGGATATGGTCGGGGTACTGTAGGTATA  
CGGTAGGGTTACTGTAGTTTGGAAATT

>WB235\_Fam\_193\_96\_1 Nr. of seq. 1 Alignment length(with gaps) = 96  
Alignment score = 0.000000  
WB235\_4:12314464-12315037 Satlength=574 Nr of Repeats=6 RepeatLength=96  
seed=GGTTGATTTG Num.seqs=5 Similarity=0.991667

0  
GGTTGATTTGCGGCACTCTACAGATAGTGGATCTGCTTCTTACCAATCTTCCCGTTACCGCCACGCACTTAAG  
CTCCAAACTATTTTATTTTTTTG

\*\*\*\*\*  
\*\*\*\*\*

Consensus:

GGTTGATTTGCGGCACTCTACAGATAGTGGATCTGCTTCTTACCAATCTTCCCGTTACCGCCACGCACTTAAG  
CTCCAAACTATTTTATTTTTTTG

>WB235\_Fam\_194\_96\_1 Nr. of seq. 1 Alignment length(with gaps) = 96  
Alignment score = 0.000000  
WB235\_4:12638029-12638605 Satlength=577 Nr of Repeats=6 RepeatLength=96  
seed=CTTCTGGTAA Num.seqs=6 Similarity=0.952778  
0  
CTTCTGGTAATGTTCCCATAATTGGGTAAATACCACTCATAAGTAACTAGTATGGGACTGAAAAGATACTAA  
ATGAGCTTATTCTAAGGGTGAAG

\*\*\*\*\*  
\*\*\*\*\*

Consensus:

CTTCTGGTAATGTTCCCATAATTGGGTAAATACCACTCATAAGTAACTAGTATGGGACTGAAAAGATACTAA  
ATGAGCTTATTCTAAGGGTGAAG

>WB235\_Fam\_195\_93\_1 Nr. of seq. 1 Alignment length(with gaps) = 93  
Alignment score = 0.000000  
WB235\_4:6921936-6922772 Satlength=837 Nr of Repeats=9 RepeatLength=93  
seed=TGCTTCTCGT Num.seqs=8 Similarity=0.966206  
0  
TGCTTCTCGTCGTCCACCACCACCACCGAAGGGAAGTGAACCCACCACCACCACCAACTGGAGAACCACAG  
GATCTTTCTGGAGAAGGTAA

\*\*\*\*\*  
\*\*\*\*\*

Consensus:

TGCTTCTCGTCGTCCACCACCACCACCGAAGGGAAGTGAACCCACCACCACCACCAACTGGAGAACCACAG  
GATCTTTCTGGAGAAGGTAA

>WB235\_Fam\_196\_93\_1 Nr. of seq. 1 Alignment length(with gaps) = 93  
Alignment score = 0.000000  
WB235\_5:1907825-1908395 Satlength=571 Nr of Repeats=7 RepeatLength=93  
seed=CAGTACCCTC Num.seqs=5 Similarity=0.954122  
0  
CAGTACCCTCAAGGATCATCTGCTCCACGGTATCCCGGTAACATAATGCCTTTGCCAGCACTTCCGATGCTC  
CACAGTATCCAGGATCCTCC

\*\*\*\*\*  
\*\*\*\*\*

Consensus:

CAGTACCCTCAAGGATCATCTGCTCCACGGTATCCCGGTAACATAATGCCTTTGCCAGCACTTCCGATGCTC  
CACAGTATCCAGGATCCTCC

>WB235\_Fam\_197\_87\_1 Nr. of seq. 1 Alignment length(with gaps) = 87  
Alignment score = 0.000000  
WB235\_4:2815904-2816246 Satlength=343 Nr of Repeats=4 RepeatLength=87  
seed=TGAAGTCGTA Num.seqs=3 Similarity=0.685393  
0  
TGAAGTCGTAGGATTCTGTGTGGTGACTGGTGTGCTTGTANTCTGTGAAGGGGACGTGGCTTCTTCCGTTGTG  
TCATGCTTCTNNGG

\*\*\*\*\*  
\*\*\*\*\*

Consensus:

TGAAGTCGTAGGATTCTGTGTGGTGAAGTGGTGTGCGTTGTANTCTGTGAAGGGGACGTGGCTTCTTCCGTTGTG  
TCATGCTTCTNNGG

>WB235\_Fam\_198\_81\_1 Nr. of seq. 1 Alignment length(with gaps) = 81

Alignment score = 0.000000

WB235\_1:14443057-14443637 Satlength=581 Nr of Repeats=8 RepeatLength=73

seed=TGTCGGCCGC Num.seqs=6 Similarity=0.624829

0

TGTCGGCCGCTACCAAACATTTAGCANACACACCAAGCACTACGTTGCGCACACACACCAAACCTGCGGAACC  
CCGAACAG

\*\*\*\*\*  
\*\*\*\*\*

Consensus:

TGTCGGCCGCTACCAAACATTTAGCANACACACCAAGCACTACGTTGCGCACACACACCAAACCTGCGGAACC  
CCGAACAG

>WB235\_Fam\_199\_80\_1 Nr. of seq. 1 Alignment length(with gaps) = 80

Alignment score = 0.000000

WB235\_4:1965986-1967712 Satlength=1727 Nr of Repeats=15 RepeatLength=80

seed=AATTTCTCAA Num.seqs=14 Similarity=0.856227

0

AATTTCTCAATAGGGCGCGCTTGCAACATCTGAACGGCGCGAAATTTGAATTTTGGCCATAAAATAACGAAA  
ACTAACT

\*\*\*\*\*  
\*\*\*\*\*

Consensus:

AATTTCTCAATAGGGCGCGCTTGCAACATCTGAACGGCGCGAAATTTGAATTTTGGCCATAAAATAACGAAA  
ACTAACT

>WB235\_Fam\_200\_78\_1 Nr. of seq. 1 Alignment length(with gaps) = 78

Alignment score = 0.000000

WB235\_3:12985357-12986137 Satlength=781 Nr of Repeats=10 RepeatLength=78

seed=CGAAGTTGCT Num.seqs=10 Similarity=0.831974

0

CGAAGTTGCTGGACCAAAGATCACAACAGGCGGATTTGGCGGCATAACCGGAGCAACAGTAGTGTCATTTGGT  
TCTTC

\*\*\*\*\*  
\*\*\*\*\*

Consensus:

CGAAGTTGCTGGACCAAAGATCACAACAGGCGGATTTGGCGGCATAACCGGAGCAACAGTAGTGTCATTTGGT  
TCTTC

>WB235\_Fam\_201\_78\_1 Nr. of seq. 1 Alignment length(with gaps) = 78  
Alignment score = 0.000000  
WB235\_5:8714029-8714965 Satlength=937 Nr of Repeats=12 RepeatLength=78  
seed=TGCAAGGCTC Num.seqs=12 Similarity=0.929325  
0  
TGCAAGGCTCCGATGATGATACCACTTCTAAAGTCGAGGTGTCACAATTTTCGGGTGTCGTAGAACTTGAATC  
AGTAC

\*\*\*\*\*  
\*\*\*\*\*  
Consensus:

TGCAAGGCTCCGATGATGATACCACTTCTAAAGTCGAGGTGTCACAATTTTCGGGTGTCGTAGAACTTGAATC  
AGTAC

>WB235\_Fam\_202\_78\_1 Nr. of seq. 1 Alignment length(with gaps) = 78  
Alignment score = 0.000000  
WB235\_5:18173031-18173742 Satlength=712 Nr of Repeats=10 RepeatLength=78  
seed=GAGCTTTGGG Num.seqs=7 Similarity=0.947904  
0  
GAGCTTTGGGGCTTTTGGCTTGATCTCAGTCGACTTGATGGATTCTGGCTTGGGTCTGCAGGCTTTTCGGGC  
TCCTT

\*\*\*\*\*  
\*\*\*\*\*  
Consensus:

GAGCTTTGGGGCTTTTGGCTTGATCTCAGTCGACTTGATGGATTCTGGCTTGGGTCTGCAGGCTTTTCGGGC  
TCCTT

>WB235\_Fam\_203\_77\_1 Nr. of seq. 1 Alignment length(with gaps) = 77  
Alignment score = 0.000000  
WB235\_4:10540321-10540705 Satlength=385 Nr of Repeats=5 RepeatLength=77  
seed=GGAAGCTTCA Num.seqs=4 Similarity=0.982684  
0  
GGAAGCTTCATCTTTTGAATTATAAAAAATAAATTTTCATTTCAAAATCAGTGTGTGCACTATCAAAAGTGTC  
CACT

\*\*\*\*\*  
\*\*\*\*\*  
Consensus:

GGAAGCTTCATCTTTTGAATTATAAAAAATAAATTTTCATTTCAAAATCAGTGTGTGCACTATCAAAAGTGTC  
CACT

>WB235\_Fam\_204\_73\_1 Nr. of seq. 1 Alignment length(with gaps) = 73  
Alignment score = 0.000000  
WB235\_2:1319234-1319605 Satlength=372 Nr of Repeats=5 RepeatLength=73  
seed=AGTTTGTAGT Num.seqs=3 Similarity=0.920852  
0  
ANTTTGTAGTTTGTAGTCTAGCAGACCAAAATTTATTAAAACTGCAGAAAATTGATGGGTCTGCTAATTAAG

\*\*\*\*\*  
Consensus:

ANNTTGTAGTTTGTAGTCTAGCAGACCAAAATTTATTA AAAA ACTGCAGAAAATTGATGGGTCTGCTAATTAAG

>WB235\_Fam\_205\_72\_1 Nr. of seq. 1 Alignment length(with gaps) = 72  
Alignment score = 0.000000  
WB235\_2:863584-866193 Satlength=2610 Nr of Repeats=35 RepeatLength=72  
seed=TCCATCCAGC Num.seqs=29 Similarity=0.928845  
0  
TCCATCCAGCTGTGGTTGGTCTCTGGGTGAATCCTCGAGAAGTATCACTAGTAGTACCATTGGCTCCGTTTCG

\*\*\*\*\*  
Consensus:

TCCATCCAGCTGTGGTTGGTCTCTGGGTGAATCCTCGAGAAGTATCACTAGTAGTACCATTGGCTCCGTTTCG

>WB235\_Fam\_206\_72\_1 Nr. of seq. 1 Alignment length(with gaps) = 72  
Alignment score = 0.000000  
WB235\_3:1608442-1609120 Satlength=679 Nr of Repeats=5 RepeatLength=72  
seed=ATGAATTTTA Num.seqs=3 Similarity=0.975309  
0  
ATGAATTTTAATACAATTTTCCTGACGATGAAGTCATAAAAATTCATTTTTTGACCTTTCAACTTTAGTTTTT

\*\*\*\*\*  
Consensus:

ATGAATTTTAATACAATTTTCCTGACGATGAAGTCATAAAAATTCATTTTTTGACCTTTCAACTTTAGTTTTT

>WB235\_Fam\_207\_72\_1 Nr. of seq. 1 Alignment length(with gaps) = 72  
Alignment score = 0.000000  
WB235\_6:15051665-15051975 Satlength=311 Nr of Repeats=5 RepeatLength=72  
seed=TGGTTGTGTT Num.seqs=4 Similarity=0.990741  
0  
TGGTTGTGTTCCCAAAGTGAGAAAAGAGGGTACAGACCTCTGTACGAATATGTCTTATCAGCTTCAAAGA

\*\*\*\*\*  
Consensus:

TGGTTGTGTTCCCAAAGTGAGAAAAGAGGGTACAGACCTCTGTACGAATATGTCTTATCAGCTTCAAAGA

>WB235\_Fam\_208\_71\_1 Nr. of seq. 1 Alignment length(with gaps) = 71  
Alignment score = 0.000000  
WB235\_1:1408704-1409384 Satlength=681 Nr of Repeats=8 RepeatLength=71  
seed=ATTTATGTGA Num.seqs=6 Similarity=0.847840  
0  
ATTTATGTGAAAATTCAGGTTTTTAGGGCATTTTTTGAGGGAAATCTGAATTTTTCCGATTTTTCTGACGA

\*\*\*\*\*  
Consensus:

ATTTATGTGAAAATTCAGGTTTTTAGGGCATTTTTTGAGGGAAATCTGAATTTTTCCGATTTTTCTGACGA

>WB235\_Fam\_209\_70\_1 Nr. of seq. 1 Alignment length(with gaps) = 70  
Alignment score = 0.000000

WB235\_4:2393736-2396081 Satlength=2346 Nr of Repeats=23 RepeatLength=70  
seed=AAAAATCGAT Num.seqs=14 Similarity=0.884668  
0

AAAAATCGATTTTTTTGAAGTTTTTCTCAATAGAGCGCATTTTCAACAGCGAAAAAATTGAATTTTCCGCC

\*\*\*\*\*  
Consensus:

AAAAATCGATTTTTTTGAAGTTTTTCTCAATAGAGCGCATTTTCAACAGCGAAAAAATTGAATTTTCCGCC

>WB235\_Fam\_210\_69\_1 Nr. of seq. 1 Alignment length(with gaps) = 69  
Alignment score = 0.000000  
WB235\_2:12336337-12336616 Satlength=280 Nr of Repeats=4 RepeatLength=69  
seed=AGGTAGGCCT Num.seqs=3 Similarity=0.747619  
0

AGGTAGGCCTGTAGGCATTGACTGNCAGAAAAGCGTAGACAGGCAAGCAGGTAAAAAGATACATGAGGC

\*\*\*\*\*  
Consensus:

AGGTAGGCCTGTAGGCATTGACTGNCAGAAAAGCGTAGACAGGCAAGCAGGTAAAAAGATACATGAGGC

>WB235\_Fam\_211\_68\_1 Nr. of seq. 1 Alignment length(with gaps) = 68  
Alignment score = 0.000000  
WB235\_1:13883897-13885190 Satlength=1294 Nr of Repeats=19 RepeatLength=68  
seed=TTGGTTGAGG Num.seqs=14 Similarity=0.987503  
0 TTGGTTGAGGCTAGAAAATGTTGTAGTTTGTAGTGTGTTAGCCTCAACCAAATTAATTTTTTTTTTAA

\*\*\*\*\*  
Consensus:

TTGGTTGAGGCTAGAAAATGTTGTAGTTTGTAGTGTGTTAGCCTCAACCAAATTAATTTTTTTTTTAA

>WB235\_Fam\_212\_68\_1 Nr. of seq. 1 Alignment length(with gaps) = 68  
Alignment score = 0.000000  
WB235\_2:6296691-6297095 Satlength=405 Nr of Repeats=6 RepeatLength=68  
seed=AATAGAGACG Num.seqs=4 Similarity=0.901961  
0 AATAGAGACGAATAAAAATTTAAAATTTTTATTAGTGTCTCTATTTTATAAAGAAAATACATTTTCAA

\*\*\*\*\*  
Consensus:

AATAGAGACGAATAAAAATTTAAAATTTTTATTAGTGTCTCTATTTTATAAAGAAAATACATTTTCAA

>WB235\_Fam\_213\_65\_1 Nr. of seq. 1 Alignment length(with gaps) = 65  
Alignment score = 0.000000  
WB235\_2:1858665-1858980 Satlength=316 Nr of Repeats=5 RepeatLength=65  
seed=TATCGAGAGA Num.seqs=3 Similarity=0.658497  
0 TATCGAGAGAATNTTCCACATTCACTTTGAATTCCNTTCCAATTTCAATAAGACTCTCAGTAAG

\*\*\*\*\*  
Consensus:

TATCGAGAGAATNTTCCACATTCACTTTGAATTCCNTTCCAATTTCAATAAGACTCTCAGTAAG

>WB235\_Fam\_214\_62\_1 Nr. of seq. 1 Alignment length(with gaps) = 62  
Alignment score = 0.000000  
WB235\_1:14101896-14102785 Satlength=890 Nr of Repeats=4 RepeatLength=62  
seed=GTAGTTTGTA Num.seqs=3 Similarity=0.928315  
0 GTAGTTTGTAGCTTTAGCCTCAACCAAATTAGCTAAAGCTTGAGTGAGGCTATGGTGATTTT

\*\*\*\*\*  
Consensus:

GTAGTTTGTAGCTTTAGCCTCAACCAAATTAGCTAAAGCTTGAGTGAGGCTATGGTGATTTT

>WB235\_Fam\_215\_62\_1 Nr. of seq. 1 Alignment length(with gaps) = 62  
Alignment score = 0.000000  
WB235\_2:13967824-13968381 Satlength=558 Nr of Repeats=7 RepeatLength=62  
seed=TGCTAACTAG Num.seqs=6 Similarity=0.822222  
0 TGCTAACTAGCTACGGCCAGCTTAGGTGCCGGCTGCACGAGCAGTCCTGGTTTAAATGTCGGC

\*\*\*\*\*  
Consensus:

TGCTAACTAGCTACGGCCAGCTTAGGTGCCGGCTGCACGAGCAGTCCTGGTTTAAATGTCGGC

>WB235\_Fam\_216\_60\_1 Nr. of seq. 1 Alignment length(with gaps) = 60  
Alignment score = 0.000000  
WB235\_5:7259575-7259935 Satlength=361 Nr of Repeats=6 RepeatLength=60  
seed=CTAGCTAGAT Num.seqs=6 Similarity=0.943704  
0 CTAGCTAGATTAAACGCTCTCAAGAGACAGCATGTTGTTGTTGCCACAAGAAGAAGGCT

\*\*\*\*\*  
Consensus:

CTAGCTAGATTAAACGCTCTCAAGAGACAGCATGTTGTTGTTGCCACAAGAAGAAGGCT

>WB235\_Fam\_217\_60\_1 Nr. of seq. 1 Alignment length(with gaps) = 60  
Alignment score = 0.000000  
WB235\_5:8699367-8702913 Satlength=3547 Nr of Repeats=59 RepeatLength=60  
seed=ATTCAGTTGA Num.seqs=58 Similarity=0.926281  
0 ATTCAGTTGAGCTCGTTATGTCGGTTGAAGACACAATTGGAGTGGTGCTTGAGGAGCTGG

\*\*\*\*\*  
Consensus:

ATTCAGTTGAGCTCGTTATGTCGGTTGAAGACACAATTGGAGTGGTGCTTGAGGAGCTGG

>WB235\_Fam\_218\_60\_1 Nr. of seq. 1 Alignment length(with gaps) = 60  
Alignment score = 0.000000  
WB235\_5:14107921-14109961 Satlength=2041 Nr of Repeats=34 RepeatLength=60  
seed=CTGCTGATTC Num.seqs=34 Similarity=0.924896  
0 CTGCTGATTCGAGAAGAAGCCCCAGCCAAGAGAGAAGCTGATAAGCCAAAGACTGAAT

\*\*\*\*\*  
Consensus:



CTGCTGATTCCGAGAAGAAGGCCCCAGCCAAGAGAGAAGCTGATAAGCCAAAGACTGAAT

>WB235\_Fam\_219\_59\_1 Nr. of seq. 1 Alignment length(with gaps) = 59  
Alignment score = 0.000000  
WB235\_2:1408410-1408750 Satlength=341 Nr of Repeats=5 RepeatLength=59  
seed=CTACAAACTA Num.seqs=3 Similarity=0.969868  
0 CTACAAACTACAAAAGCCTATTTAGCAGACCCACGCCAACTTCTGATGGGTCTGCTAGA

\*\*\*\*\*  
Consensus:

CTACAAACTACAAAAGCCTATTTAGCAGACCCACGCCAACTTCTGATGGGTCTGCTAGA

>WB235\_Fam\_220\_57\_1 Nr. of seq. 1 Alignment length(with gaps) = 57  
Alignment score = 0.000000  
WB235\_5:14104614-14106168 Satlength=1555 Nr of Repeats=20 RepeatLength=57  
seed=GAAGTCAACA Num.seqs=13 Similarity=0.959214  
0 GAAGTCAACAAGCTGATCAAGAGCAACACCGTGGATCCCGAGCTGCCGGACAGAAGG

\*\*\*\*\*  
Consensus:

GAAGTCAACAAGCTGATCAAGAGCAACACCGTGGATCCCGAGCTGCCGGACAGAAGG

>WB235\_Fam\_221\_55\_1 Nr. of seq. 1 Alignment length(with gaps) = 55  
Alignment score = 0.000000  
WB235\_2:1204743-1204963 Satlength=221 Nr of Repeats=4 RepeatLength=55  
seed=GGGATTATTG Num.seqs=4 Similarity=0.903030  
0 GGGATTATTGGAGTTTCTTTTTCTAGAATTTTTTGAAAATTTTGGACAGTTTTTTT

\*\*\*\*\*  
Consensus:

GGGATTATTGGAGTTTCTTTTTCTAGAATTTTTTGAAAATTTTGGACAGTTTTTTT

>WB235\_Fam\_222\_55\_1 Nr. of seq. 1 Alignment length(with gaps) = 55  
Alignment score = 0.000000  
WB235\_4:6009084-6009409 Satlength=326 Nr of Repeats=6 RepeatLength=55  
seed=AAGAGTCCCC Num.seqs=4 Similarity=1.000000  
0 AAGAGTCCCCACACACTGAAAGGTTTTAAGGAATTTTTTGAGGATTCCTAGGGTT

\*\*\*\*\*  
Consensus:

AAGAGTCCCCACACACTGAAAGGTTTTAAGGAATTTTTTGAGGATTCCTAGGGTT

>WB235\_Fam\_223\_52\_1 Nr. of seq. 1 Alignment length(with gaps) = 52  
Alignment score = 0.000000  
WB235\_6:16837630-16838124 Satlength=495 Nr of Repeats=4 RepeatLength=52  
seed=GCATGTCTTC Num.seqs=3 Similarity=0.626263  
0 GCATGTCTTCCAAGCGTTTTGAGCCACGCNTGGGATTCCTATACACGGCTG

\*\*\*\*\*

Consensus:

GCATGTCTTCCAAGCGTTTTGAGCCACGCNTGGGATTTCTTATACACGGCTG

>WB235\_Fam\_224\_51\_1 Nr. of seq. 1 Alignment length(with gaps) = 51  
Alignment score = 0.000000  
WB235\_4:7727050-7727263 Satlength=214 Nr of Repeats=5 RepeatLength=51  
seed=CCATCCGAAG Num.seqs=3 Similarity=0.912854  
0 CCATCCGAAGATCCTCAACCATCTGGCCCACCATCTCCGGGACCAGTGGAC

\*\*\*\*\*

Consensus:

CCATCCGAAGATCCTCAACCATCTGGCCCACCATCTCCGGGACCAGTGGAC

>WB235\_Fam\_225\_50\_1 Nr. of seq. 1 Alignment length(with gaps) = 50  
Alignment score = 0.000000  
WB235\_1:12480947-12481197 Satlength=251 Nr of Repeats=5 RepeatLength=50  
seed=ACACATGCTA Num.seqs=5 Similarity=0.952000  
0 ACACATGCTATAACATTGTCTCCTTCCCCTAGTGACGAGAGCGGCCGTT

\*\*\*\*\*

Consensus:

ACACATGCTATAACATTGTCTCCTTCCCCTAGTGACGAGAGCGGCCGTT

>WB235\_Fam\_226\_50\_1 Nr. of seq. 1 Alignment length(with gaps) = 50  
Alignment score = 0.000000  
WB235\_4:16427870-16428521 Satlength=652 Nr of Repeats=13 RepeatLength=50  
seed=GGGCGTGTTT Num.seqs=10 Similarity=0.897482  
0 GGGCGTGTTTTACATGCCCCGCCACAAAATTGATGTTTCCACCAAAT

\*\*\*\*\*

Consensus:

GGGCGTGTTTTACATGCCCCGCCACAAAATTGATGTTTCCACCAAAT

>WB235\_Fam\_227\_49\_1 Nr. of seq. 1 Alignment length(with gaps) = 49  
Alignment score = 0.000000  
WB235\_1:1620047-1620586 Satlength=540 Nr of Repeats=9 RepeatLength=49  
seed=CAATAATTTT Num.seqs=7 Similarity=0.909297  
0 CAATAATTTTAAATTAAATTATCGATTTTTCTAAATTTTCCGAAAAAT

\*\*\*\*\*

Consensus:

CAATAATTTTAAATTAAATTATCGATTTTTCTAAATTTTCCGAAAAAT

>WB235\_Fam\_228\_49\_1 Nr. of seq. 1 Alignment length(with gaps) = 49  
Alignment score = 0.000000  
WB235\_5:14766633-14767947 Satlength=1315 Nr of Repeats=28 RepeatLength=49  
seed=GCTACGATAT Num.seqs=20 Similarity=0.947870  
0 GCTACGATATCGTAGCACTTTTTTATTTTCCATATCCACCAAAAAAC

\*\*\*\*\*

Consensus:

GCTACGATATCGTAGCACTTTTTTATTTTCCATATTCCACCAAAAAAC

>WB235\_Fam\_229\_48\_1 Nr. of seq. 1 Alignment length(with gaps) = 48

Alignment score = 0.000000

WB235\_2:13284530-13285104 Satlength=575 Nr of Repeats=12 RepeatLength=48

seed=TGCTTACGTG Num.seqs=10 Similarity=0.812346

0 TGCCTACGTGCCTACAAAACAGGCGTAGGCAGCTTTAAAGGTGATGCA

\*\*\*\*\*

Consensus:

TGCCTACGTGCCTACAAAACAGGCGTAGGCAGCTTTAAAGGTGATGCA

>WB235\_Fam\_230\_48\_1 Nr. of seq. 1 Alignment length(with gaps) = 48

Alignment score = 0.000000

WB235\_6:14262861-14263101 Satlength=241 Nr of Repeats=5 RepeatLength=48

seed=GGAGGTGGAG Num.seqs=5 Similarity=0.841667

0 GGAGGTGGAGAAAGTGTAGTTCCCGGTGGTCGNGGCTCTTCNGAGGGT

\*\*\*\*\*

Consensus:

GGAGGTGGAGAAAGTGTAGTTCCCGGTGGTCGNGGCTCTTCNGAGGGT

>WB235\_Fam\_231\_46\_1 Nr. of seq. 1 Alignment length(with gaps) = 46

Alignment score = 0.000000

WB235\_6:1980629-1980811 Satlength=183 Nr of Repeats=4 RepeatLength=46

seed=TTGTTAAATTG Num.seqs=3 Similarity=0.835749

0 TTGTTAAATTGCCTCCCGGANCACTTTTCTTATTCCCAACTA

\*\*\*\*\*

Consensus:

TTGTTAAATTGCCTCCCGGANCACTTTTCTTATTCCCAACTA

>WB235\_Fam\_232\_45\_1 Nr. of seq. 1 Alignment length(with gaps) = 45

Alignment score = 0.000000

WB235\_4:7734990-7736070 Satlength=1081 Nr of Repeats=24 RepeatLength=45

seed=ACCATCAGGC Num.seqs=24 Similarity=0.963714

0 ACCATCAGGCGGACCACCAGGACCATTTGATCCATCAGGAGCACC

\*\*\*\*\*

Consensus:

ACCATCAGGCGGACCACCAGGACCATTTGATCCATCAGGAGCACC

>WB235\_Fam\_233\_45\_1 Nr. of seq. 1 Alignment length(with gaps) = 45

Alignment score = 0.000000

WB235\_5:11273771-11274491 Satlength=721 Nr of Repeats=16 RepeatLength=45  
seed=ACAACTGAAT Num.seqs=16 Similarity=0.992593  
0 ACAACTGAATCAACTGCAGCACCAAGCACATCTACAGAGACACCT

\*\*\*\*\*

Consensus:

ACAACTGAATCAACTGCAGCACCAAGCACATCTACAGAGACACCT

>WB235\_Fam\_234\_45\_1 Nr. of seq. 1 Alignment length(with gaps) = 45  
Alignment score = 0.000000

WB235\_6:17441768-17447783 Satlength=6016 Nr of Repeats=134  
RepeatLength=45 seed=CCACCAGCAC Num.seqs=122 Similarity=0.923840  
0 CCACCAGCACTGCTTCGAGTACGACAGAAAGCACTTCGACTCCAT

\*\*\*\*\*

Consensus:

CCACCAGCACTGCTTCGAGTACGACAGAAAGCACTTCGACTCCAT

>WB235\_Fam\_235\_43\_1 Nr. of seq. 1 Alignment length(with gaps) = 43  
Alignment score = 0.000000

WB235\_2:2171107-2172182 Satlength=1076 Nr of Repeats=24 RepeatLength=43  
seed=CGAGTTTGGC Num.seqs=23 Similarity=0.818978  
0 CGAGTTTGGCCTACANCAAATTTGGCAAATTCGGCAAATTTGC

\*\*\*\*\*

Consensus:

CGAGTTTGGCCTACANCAAATTTGGCAAATTCGGCAAATTTGC

>WB235\_Fam\_236\_43\_1 Nr. of seq. 1 Alignment length(with gaps) = 43  
Alignment score = 0.000000

WB235\_2:14130915-14131087 Satlength=173 Nr of Repeats=4 RepeatLength=43  
seed=GAAAACTAGG Num.seqs=4 Similarity=0.715762  
0 GAAAACTAGGCCACAGAGTTCAAATTGATGGCCTAGAAATCTA

\*\*\*\*\*

Consensus:

GAAAACTAGGCCACAGAGTTCAAATTGATGGCCTAGAAATCTA

>WB235\_Fam\_237\_43\_1 Nr. of seq. 1 Alignment length(with gaps) = 43  
Alignment score = 0.000000

WB235\_3:1385873-1386532 Satlength=660 Nr of Repeats=5 RepeatLength=43  
seed=GGCTCTCGGC Num.seqs=3 Similarity=0.627907  
0 GGCTCTCGGCTCGCGCCGAGAGCCGAGNTCTACTNAAAGTTTC

\*\*\*\*\*

Consensus:

GGCTCTCGGCTCGCGCCGAGAGCCGAGNTCTACTNAAAGTTTC

>WB235\_Fam\_238\_43\_1 Nr. of seq. 1 Alignment length(with gaps) = 43  
Alignment score = 0.000000  
WB235\_3:12305325-12305929 Satlength=605 Nr of Repeats=14 RepeatLength=43  
seed=AGCAGCCGAC Num.seqs=11 Similarity=0.800423  
0 AGCAGCCGACAGTTGCCGGTTGCCGAAAAATTGCAGTAATTTTC

\*\*\*\*\*  
Consensus:

AGCAGCCGACAGTTGCCGGTTGCCGAAAAATTGCAGTAATTTTC

>WB235\_Fam\_239\_42\_1 Nr. of seq. 1 Alignment length(with gaps) = 42  
Alignment score = 0.000000  
WB235\_1:724780-724948 Satlength=169 Nr of Repeats=4 RepeatLength=42  
seed=TTTGATCTAC Num.seqs=4 Similarity=0.968254  
0 TTTGATCTACAAAAAATGCGGGAATTTTCCCAGCATTGCTCA

\*\*\*\*\*  
Consensus:

TTTGATCTACAAAAAATGCGGGAATTTTCCCAGCATTGCTCA

>WB235\_Fam\_240\_42\_1 Nr. of seq. 1 Alignment length(with gaps) = 42  
Alignment score = 0.000000  
WB235\_5:6188375-6189068 Satlength=694 Nr of Repeats=15 RepeatLength=42  
seed=AGGTGCTGCT Num.seqs=9 Similarity=0.859788  
0 AGGTGCTGCTTCCTTTGGAACATCTGCTTGGGTTGGCTCCGA

\*\*\*\*\*  
Consensus:

AGGTGCTGCTTCCTTTGGAACATCTGCTTGGGTTGGCTCCGA

>WB235\_Fam\_241\_41\_1 Nr. of seq. 1 Alignment length(with gaps) = 41  
Alignment score = 0.000000  
WB235\_4:3696437-3696683 Satlength=247 Nr of Repeats=6 RepeatLength=41  
seed=AAATTTTAA Num.seqs=6 Similarity=0.947967  
0 AAATTTTAAACGAGAAGTGGGCGAAAATCATTCAAAAATTC

\*\*\*\*\*  
Consensus:

AAATTTTAAACGAGAAGTGGGCGAAAATCATTCAAAAATTC

>WB235\_Fam\_242\_41\_1 Nr. of seq. 1 Alignment length(with gaps) = 41  
Alignment score = 0.000000  
WB235\_5:20236849-20237152 Satlength=304 Nr of Repeats=5 RepeatLength=41  
seed=GCATTTTTCG Num.seqs=3 Similarity=0.772358  
0 GCATTTTTCGCCGATTTTNNATTAATTTTCAGTGAAAATTC

\*\*\*\*\*  
Consensus:

GCATTTTTCGCCGATTTTNNATTAATTTTCAGTGAAAATTC

>WB235\_Fam\_243\_40\_1 Nr. of seq. 1 Alignment length(with gaps) = 40  
Alignment score = 0.000000  
WB235\_3:404417-405141 Satlength=725 Nr of Repeats=7 RepeatLength=40  
seed=TCCACGTGGA Num.seqs=5 Similarity=0.650794  
0 TCCACGTGGAATTTTCAGAATTTTCNCAGAAAATTGAAA

\*\*\*\*\*  
Consensus:

TCCACGTGGAATTTTCAGAATTTTCNCAGAAAATTGAAA

>WB235\_Fam\_244\_40\_1 Nr. of seq. 1 Alignment length(with gaps) = 40  
Alignment score = 0.000000  
WB235\_5:18865200-18865555 Satlength=356 Nr of Repeats=7 RepeatLength=40  
seed=GAATTTTTTG Num.seqs=6 Similarity=0.926667  
0 GAATTTTTTGTCAATTCTACTGAATTTTCCAAATTTTCAGC

\*\*\*\*\*  
Consensus:

GAATTTTTTGTCAATTCTACTGAATTTTCCAAATTTTCAGC

>WB235\_Fam\_245\_40\_1 Nr. of seq. 1 Alignment length(with gaps) = 40  
Alignment score = 0.000000  
WB235\_5:18879684-18879863 Satlength=180 Nr of Repeats=5 RepeatLength=40  
seed=TTTTGCCGAA Num.seqs=3 Similarity=0.629630  
0 TTTTGCCAAAAATNTGTCAATTTTGTGGAATTTCTNTCAT

\*\*\*\*\*  
Consensus:

TTTTTGCCAAAAATNTGTCAATTTTGTGGAATTTCTNTCAT

>WB235\_Fam\_246\_39\_1 Nr. of seq. 1 Alignment length(with gaps) = 39  
Alignment score = 0.000000  
WB235\_2:3494517-3494748 Satlength=232 Nr of Repeats=5 RepeatLength=39  
seed=AATTTCCCGC Num.seqs=3 Similarity=0.769444  
0 AATTTCCCGCCAAAATTGAATTTTTTTAAAGAAAATTTA

\*\*\*\*\*  
Consensus:

AATTTCCCGCCAAAATTGAATTTTTTTAAAGAAAATTTA

>WB235\_Fam\_247\_39\_1 Nr. of seq. 1 Alignment length(with gaps) = 39  
Alignment score = 0.000000  
WB235\_4:4996655-4997045 Satlength=391 Nr of Repeats=8 RepeatLength=39  
seed=CCAACTGGAG Num.seqs=7 Similarity=0.784921  
0 CCAACTGGAGCCAGCACNATGACCGCTGTTGGAGAGCA

\*\*\*\*\*  
Consensus:

CCAACTGGAGCCAGCACNATGACCGCTGTTGGAGGAGCA

>WB235\_Fam\_248\_39\_1 Nr. of seq. 1 Alignment length(with gaps) = 39  
Alignment score = 0.000000  
WB235\_5:3694442-3694754 Satlength=313 Nr of Repeats=8 RepeatLength=39  
seed=GATTTACGGG Num.seqs=6 Similarity=0.849573  
0 GATTTACGGGCTTTAATCAGTTTCGAAAAAGCTTGTGTC

\*\*\*\*\*  
Consensus:

GATTTACGGGCTTTAATCAGTTTCGAAAAAGCTTGTGTC

>WB235\_Fam\_249\_39\_1 Nr. of seq. 1 Alignment length(with gaps) = 39  
Alignment score = 0.000000  
WB235\_5:12633007-12633394 Satlength=388 Nr of Repeats=10 RepeatLength=39  
seed=TGGTACGGTA Num.seqs=9 Similarity=0.880342  
0 TGGTACGGTAGTTGTAGTGGTAGTGGAGGTTGTTGTTGG

\*\*\*\*\*  
Consensus:

TGGTACGGTAGTTGTAGTGGTAGTGGAGGTTGTTGTTGG

>WB235\_Fam\_250\_39\_1 Nr. of seq. 1 Alignment length(with gaps) = 39  
Alignment score = 0.000000  
WB235\_5:18636764-18637321 Satlength=558 Nr of Repeats=15 RepeatLength=39  
seed=GTAATTTATA Num.seqs=13 Similarity=0.917598  
0 GTAATTTATAATTTTTTAAAGATGAGTAATATATTGCC

\*\*\*\*\*  
Consensus:

GTAATTTATAATTTTTTAAAGATGAGTAATATATTGCC

>WB235\_Fam\_251\_39\_1 Nr. of seq. 1 Alignment length(with gaps) = 39  
Alignment score = 0.000000  
WB235\_6:17179152-17179971 Satlength=820 Nr of Repeats=21 RepeatLength=39  
seed=ATTGATACTT Num.seqs=21 Similarity=0.932601  
0 ATTGATACTTTGTTCGGGTTTAGACCATCGGCCGAGCTTC

\*\*\*\*\*  
Consensus:

ATTGATACTTTGTTCGGGTTTAGACCATCGGCCGAGCTTC

>WB235\_Fam\_252\_38\_1 Nr. of seq. 1 Alignment length(with gaps) = 38  
Alignment score = 0.000000  
WB235\_1:1987299-1987635 Satlength=337 Nr of Repeats=5 RepeatLength=38  
seed=AAAATCGATA Num.seqs=3 Similarity=1.000000  
0 AAAATCGATAATTTTCAGTATGCAGTGAAATTCCTTGA

\*\*\*\*\*

Consensus:

AAAAATCGATAATTTTCAGTATGCAGTGAAATTCTTGGA

>WB235\_Fam\_253\_37\_1 Nr. of seq. 1 Alignment length(with gaps) = 37  
Alignment score = 0.000000  
WB235\_1:9925221-9925359 Satlength=139 Nr of Repeats=5 RepeatLength=37  
seed=ATAATTTTTC Num.seqs=3 Similarity=1.000000  
0 ATAATTTTTCCTTGAGTAATGAGAGACTTTTTCATAAT

\*\*\*\*\*

Consensus:

ATAATTTTTCCTTGAGTAATGAGAGACTTTTTCATAAT

>WB235\_Fam\_254\_36\_1 Nr. of seq. 1 Alignment length(with gaps) = 36  
Alignment score = 0.000000  
WB235\_3:12513645-12515229 Satlength=1585 Nr of Repeats=44 RepeatLength=36  
seed=GATATTTTCA Num.seqs=44 Similarity=0.951257  
0 GATATTTTCATGTTTCGGCAAAAGTACCGATTGCCA

\*\*\*\*\*

Consensus:

GATATTTTCATGTTTCGGCAAAAGTACCGATTGCCA

>WB235\_Fam\_255\_36\_1 Nr. of seq. 1 Alignment length(with gaps) = 36  
Alignment score = 0.000000  
WB235\_6:17674798-17675174 Satlength=377 Nr of Repeats=7 RepeatLength=36  
seed=CCACCAACTC Num.seqs=6 Similarity=0.728395  
0 CCACCAACTCCAAAATCAGCTGCTCCATCAGAAAGTC

\*\*\*\*\*

Consensus:

CCACCAACTCCAAAATCAGCTGCTCCATCAGAAAGTC

>WB235\_Fam\_256\_35\_1 Nr. of seq. 1 Alignment length(with gaps) = 35  
Alignment score = 0.000000  
WB235\_1:11201002-11201638 Satlength=637 Nr of Repeats=9 RepeatLength=35  
seed=AATTGCCGAA Num.seqs=7 Similarity=0.793210  
0 AATTGCCGAATTTCTCGTTTTTGGCAATTTACCAA

\*\*\*\*\*

Consensus:

AATTGCCGAATTTCTCGTTTTTGGCAATTTACCAA

>WB235\_Fam\_257\_35\_1 Nr. of seq. 1 Alignment length(with gaps) = 35  
Alignment score = 0.000000  
WB235\_2:12795532-12795808 Satlength=277 Nr of Repeats=8 RepeatLength=35  
seed=TGTGTAATAA Num.seqs=5 Similarity=0.794286  
0 TGTGTAATAAGAAAATTTCAAATTTTTTTCACGAA



\*\*\*\*\*

Consensus:

TGTGTAATAAGAAAATTTCAAATTTTTTTCACGAA

>WB235\_Fam\_258\_35\_1 Nr. of seq. 1 Alignment length(with gaps) = 35  
Alignment score = 0.000000  
WB235\_5:1015554-1016070 Satlength=517 Nr of Repeats=9 RepeatLength=35  
seed=GCATTTGCCG Num.seqs=6 Similarity=0.817143  
0 GCATTTGCCGATTTTTTAAAATTTCTGGCAATTCCA

\*\*\*\*\*

Consensus:

GCATTTGCCGATTTTTTAAAATTTCTGGCAATTCCA

>WB235\_Fam\_259\_34\_1 Nr. of seq. 1 Alignment length(with gaps) = 34  
Alignment score = 0.000000  
WB235\_2:14100395-14100701 Satlength=307 Nr of Repeats=8 RepeatLength=34  
seed=CCGTGCCTAC Num.seqs=7 Similarity=0.828198  
0 CCGTGCCTACTAACCTACCGACCTTGCTGCCTT

\*\*\*\*\*

Consensus:

CCGTGCCTACTAACCTACCGACCTTGCTGCCTT

>WB235\_Fam\_260\_34\_1 Nr. of seq. 1 Alignment length(with gaps) = 34  
Alignment score = 0.000000  
WB235\_3:11798467-11798684 Satlength=218 Nr of Repeats=6 RepeatLength=34  
seed=TTGCCGAATT Num.seqs=5 Similarity=0.811765  
0 TTGCCGAATTTGCCGTTTGCCGAGCTCGTCAAAT

\*\*\*\*\*

Consensus:

TTGCCGAATTTGCCGTTTGCCGAGCTCGTCAAAT

>WB235\_Fam\_261\_34\_1 Nr. of seq. 1 Alignment length(with gaps) = 34  
Alignment score = 0.000000  
WB235\_3:11864487-11864917 Satlength=431 Nr of Repeats=13 RepeatLength=34  
seed=AAGTATTTTT Num.seqs=12 Similarity=0.954843  
0 AAGTATTTTTTGCCGTTTTTTTTGCCGAAATTTCC

\*\*\*\*\*

Consensus:

AAGTATTTTTTGCCGTTTTTTTTGCCGAAATTTCC

>WB235\_Fam\_262\_33\_1 Nr. of seq. 1 Alignment length(with gaps) = 33  
Alignment score = 0.000000

WB235\_1:2251015-2251148 Satlength=134 Nr of Repeats=4 RepeatLength=33  
seed=TAAGAAAAGT Num.seqs=3 Similarity=0.892256  
0 TAAGAAAAGTTAGGCCACCAAACCTTTGGTGAAC

\*\*\*\*\*

Consensus:

TAAGAAAAGTTAGGCCACCAAACCTTTGGTGAAC

>WB235\_Fam\_263\_32\_1 Nr. of seq. 1 Alignment length(with gaps) = 32  
Alignment score = 0.000000  
WB235\_1:8484982-8485111 Satlength=130 Nr of Repeats=4 RepeatLength=32  
seed=AAAATCGAAA Num.seqs=3 Similarity=1.000000  
0 AAAATCGAAAAATTCTCGTTTTTCAATTTTTA

\*\*\*\*\*

Consensus:

AAAATCGAAAAATTCTCGTTTTTCAATTTTTA

>WB235\_Fam\_264\_32\_1 Nr. of seq. 1 Alignment length(with gaps) = 32  
Alignment score = 0.000000  
WB235\_1:11313617-11315164 Satlength=1548 Nr of Repeats=48 RepeatLength=32  
seed=GCAATTTTTTA Num.seqs=37 Similarity=0.890140  
0 GCAATTTTTTAGGCTAAAAATCACTAAAAAACT

\*\*\*\*\*

Consensus:

GCAATTTTTTAGGCTAAAAATCACTAAAAAACT

>WB235\_Fam\_265\_32\_1 Nr. of seq. 1 Alignment length(with gaps) = 32  
Alignment score = 0.000000  
WB235\_3:12072321-12073804 Satlength=1484 Nr of Repeats=45 RepeatLength=32  
seed=AAATTTGTGA Num.seqs=34 Similarity=0.906566  
0 AAATTTGTGAAAATTTAGGCCCATTTTGCTCA

\*\*\*\*\*

Consensus:

AAATTTGTGAAAATTTAGGCCCATTTTGCTCA

>WB235\_Fam\_266\_32\_1 Nr. of seq. 1 Alignment length(with gaps) = 32  
Alignment score = 0.000000  
WB235\_5:20705245-20705371 Satlength=127 Nr of Repeats=4 RepeatLength=32  
seed=GTGCGTCCGG Num.seqs=3 Similarity=0.888889  
0 GTGCGTCCGGCGTCCGGAAAAAGCGGACGCGT

\*\*\*\*\*

Consensus:

GTGCGTCCGGCGTCCGGAAAAAGCGGACGCGT

>WB235\_Fam\_267\_31\_1 Nr. of seq. 1 Alignment length(with gaps) = 31  
Alignment score = 0.000000  
WB235\_2:3070377-3070511 Satlength=135 Nr of Repeats=4 RepeatLength=31  
seed=ATCGATTTTT Num.seqs=3 Similarity=0.700337  
0 ATCGATTTTTTCGTTAAAAAATCAATAAAAT

\*\*\*\*\*  
Consensus:

ATCGATTTTTTCGTTAAAAAATCAATAAAAT

>WB235\_Fam\_268\_31\_1 Nr. of seq. 1 Alignment length(with gaps) = 31  
Alignment score = 0.000000  
WB235\_2:3691112-3691360 Satlength=249 Nr of Repeats=8 RepeatLength=31  
seed=GCTGATTGGT Num.seqs=8 Similarity=0.553571  
0 GCTGATTGGTCGGCGNGGTTGCCCATCNTT

\*\*\*\*\*  
Consensus:

GCTGATTGGTCGGCGNGGTTGCCCATCNTT

>WB235\_Fam\_269\_31\_1 Nr. of seq. 1 Alignment length(with gaps) = 31  
Alignment score = 0.000000  
WB235\_2:12455807-12455995 Satlength=189 Nr of Repeats=6 RepeatLength=31  
seed=GACATCTCGC Num.seqs=4 Similarity=0.584229  
0 GACATCTCGCAGGACATTATAAGAAGCGACC

\*\*\*\*\*  
Consensus:

GACATCTCGCAGGACATTATAAGAAGCGACC

>WB235\_Fam\_270\_31\_1 Nr. of seq. 1 Alignment length(with gaps) = 31  
Alignment score = 0.000000  
WB235\_2:13281689-13282092 Satlength=404 Nr of Repeats=10 RepeatLength=31  
seed=CACGCCTATT Num.seqs=7 Similarity=0.811572  
0 CACGCCTATTTTATGGGCGGAGTCTACAAGC

\*\*\*\*\*  
Consensus:

CACGCCTATTTTATGGGCGGAGTCTACAAGC

>WB235\_Fam\_271\_31\_1 Nr. of seq. 1 Alignment length(with gaps) = 31  
Alignment score = 0.000000  
WB235\_3:2009666-2010596 Satlength=931 Nr of Repeats=27 RepeatLength=31  
seed=TGCGTCGGAA Num.seqs=23 Similarity=0.733775  
0 TGCGTCGGAAATTNATTCCGATCATCGCCGG

\*\*\*\*\*  
Consensus:

TGCGTCGGAAATTNATTCCGATCATCGCCGG

>WB235\_Fam\_272\_31\_1 Nr. of seq. 1 Alignment length(with gaps) = 31  
Alignment score = 0.000000  
WB235\_3:2011573-2012317 Satlength=745 Nr of Repeats=17 RepeatLength=31  
seed=TCCGATGCAT Num.seqs=13 Similarity=0.625486  
0 TCCGATGCATTGCCGATAATCGGAACCTGGT

\*\*\*\*\*  
Consensus:

TCCGATGCATTGCCGATAATCGGAACCTGGT

>WB235\_Fam\_273\_31\_1 Nr. of seq. 1 Alignment length(with gaps) = 31  
Alignment score = 0.000000  
WB235\_3:11002899-11003053 Satlength=155 Nr of Repeats=5 RepeatLength=31  
seed=GCAGCCGACG Num.seqs=4 Similarity=0.524411  
0 GCAGCCGACGCTATACGGGTCTGATGGAGTA

\*\*\*\*\*  
Consensus:

GCAGCCGACGCTATACGGGTCTGATGGAGTA

>WB235\_Fam\_274\_31\_1 Nr. of seq. 1 Alignment length(with gaps) = 31  
Alignment score = 0.000000  
WB235\_3:11189285-11189691 Satlength=407 Nr of Repeats=12 RepeatLength=31  
seed=TCTGAGCTAC Num.seqs=11 Similarity=0.755258  
0 TCTGAGCTACAGTACTCCTGTCAAGAACAAAT

\*\*\*\*\*  
Consensus:

TCTGAGCTACAGTACTCCTGTCAAGAACAAAT

>WB235\_Fam\_275\_31\_1 Nr. of seq. 1 Alignment length(with gaps) = 31  
Alignment score = 0.000000  
WB235\_3:12817385-12817569 Satlength=185 Nr of Repeats=5 RepeatLength=31  
seed=GATTTTTTCA Num.seqs=3 Similarity=0.659722  
0 GATTTTTTCAGNGAAAANCNAAAAATTTTCG

\*\*\*\*\*  
Consensus:

GATTTTTTCAGNGAAAANCNAAAAATTTTCG

>WB235\_Fam\_276\_31\_1 Nr. of seq. 1 Alignment length(with gaps) = 31  
Alignment score = 0.000000  
WB235\_3:13167617-13167762 Satlength=146 Nr of Repeats=5 RepeatLength=31  
seed=CCAAAAATGA Num.seqs=4 Similarity=0.863799  
0 CCAAAAATGACTGAAAATAGTCAAAAATTAG

\*\*\*\*\*  
Consensus:

CCAAAAATGACTGAAAATAGTCAAAAATTAG

>WB235\_Fam\_277\_31\_1 Nr. of seq. 1 Alignment length(with gaps) = 31  
Alignment score = 0.000000  
WB235\_4:775288-775412 Satlength=125 Nr of Repeats=4 RepeatLength=31  
seed=CAAAAATCGG Num.seqs=4 Similarity=0.949821  
0 CAAAAATCGGGAAATTTTCACAAAAAATGC

\*\*\*\*\*  
Consensus:

CAAAAATCGGGAAATTTTCACAAAAAATGC

>WB235\_Fam\_278\_31\_1 Nr. of seq. 1 Alignment length(with gaps) = 31  
Alignment score = 0.000000  
WB235\_5:18415750-18416287 Satlength=538 Nr of Repeats=16 RepeatLength=31  
seed=TTGGCCCAGA Num.seqs=11 Similarity=0.885826  
0 TTGGCCCAGAGCTCTCTTGACCCAAGCCCC

\*\*\*\*\*  
Consensus:

TTGGCCCAGAGCTCTCTTGACCCAAGCCCC

>WB235\_Fam\_279\_31\_1 Nr. of seq. 1 Alignment length(with gaps) = 31  
Alignment score = 0.000000  
WB235\_5:18536998-18537693 Satlength=696 Nr of Repeats=5 RepeatLength=31  
seed=AAAAATTTTGA Num.seqs=3 Similarity=0.971326  
0 AAAAATTTTGACCCAGAAATCGAAAAATTCGC

\*\*\*\*\*  
Consensus:

AAAAATTTTGACCCAGAAATCGAAAAATTCGC

>WB235\_Fam\_280\_31\_1 Nr. of seq. 1 Alignment length(with gaps) = 31  
Alignment score = 0.000000  
WB235\_5:18855835-18856039 Satlength=205 Nr of Repeats=6 RepeatLength=31  
seed=TCGTTTTTTC Num.seqs=5 Similarity=0.819355  
0 TCGTTTTTTCATGAAAAAATCAATTTTCGG

\*\*\*\*\*  
Consensus:

TCGTTTTTTCATGAAAAAATCAATTTTCGG

>WB235\_Fam\_281\_31\_1 Nr. of seq. 1 Alignment length(with gaps) = 31  
Alignment score = 0.000000  
WB235\_5:20407384-20407602 Satlength=219 Nr of Repeats=4 RepeatLength=31  
seed=GAAAAAGTGC Num.seqs=3 Similarity=0.784722  
0 GAAAAAGTGCTGAAAATCACATTTTGAAT

\*\*\*\*\*

Consensus:

GAAAAAGTGCTGAAAATCACATTTTGAAC

>WB235\_Fam\_282\_30\_1 Nr. of seq. 1 Alignment length(with gaps) = 30  
Alignment score = 0.000000  
WB235\_1:1704545-1705424 Satlength=880 Nr of Repeats=24 RepeatLength=30  
seed=AATTTGAATT Num.seqs=15 Similarity=0.732487  
0 AATTTGAATTTTCCCGAATTTTNAACGAA

\*\*\*\*\*

Consensus:

AATTTGAATTTTCCCGAATTTTNAACGAA

>WB235\_Fam\_283\_30\_1 Nr. of seq. 1 Alignment length(with gaps) = 30  
Alignment score = 0.000000  
WB235\_1:6514283-6515118 Satlength=836 Nr of Repeats=13 RepeatLength=30  
seed=TGGTGGAAC Num.seqs=11 Similarity=0.953131  
0 TGGTGGAAC TGGATTCGGCAGTGGAATGC

\*\*\*\*\*

Consensus:

TGGTGGAAC TGGATTCGGCAGTGGAATGC

>WB235\_Fam\_284\_30\_1 Nr. of seq. 1 Alignment length(with gaps) = 30  
Alignment score = 0.000000  
WB235\_1:11404108-11404462 Satlength=355 Nr of Repeats=10 RepeatLength=30  
seed=CCTTGGGCTC Num.seqs=7 Similarity=0.875132  
0 CCTTGGGCTCCCTGAGCTCCAAATTGTGCT

\*\*\*\*\*

Consensus:

CCTTGGGCTCCCTGAGCTCCAAATTGTGCT

>WB235\_Fam\_285\_30\_1 Nr. of seq. 1 Alignment length(with gaps) = 30  
Alignment score = 0.000000  
WB235\_1:12109993-12110203 Satlength=211 Nr of Repeats=7 RepeatLength=30  
seed=GTCATTATCA Num.seqs=7 Similarity=0.974603  
0 GTCATTATCAGCTTCTGGTGTCTTAGAAGA

\*\*\*\*\*

Consensus:

GTCATTATCAGCTTCTGGTGTCTTAGAAGA

>WB235\_Fam\_286\_30\_1 Nr. of seq. 1 Alignment length(with gaps) = 30  
Alignment score = 0.000000  
WB235\_2:12171287-12172252 Satlength=966 Nr of Repeats=32 RepeatLength=30  
seed=CAAACTACAG Num.seqs=27 Similarity=0.878569  
0 CAAACTACAGTAGTACTGTAGTACCATAAC

\*\*\*\*\*

Consensus:

CAAACCTACAGTAGTACTGTAGTACCATAAC

>WB235\_Fam\_287\_30\_1 Nr. of seq. 1 Alignment length(with gaps) = 30  
Alignment score = 0.000000  
WB235\_2:12979640-12979790 Satlength=151 Nr of Repeats=4 RepeatLength=30  
seed=TTCAGGCAGG Num.seqs=3 Similarity=0.644444  
0 TTCAGGCAGGCATAGGTTACTTTGAAAATT

\*\*\*\*\*

Consensus:

TTCAGGCAGGCATAGGTTACTTTGAAAATT

>WB235\_Fam\_288\_30\_1 Nr. of seq. 1 Alignment length(with gaps) = 30  
Alignment score = 0.000000  
WB235\_3:3740014-3740583 Satlength=570 Nr of Repeats=9 RepeatLength=30  
seed=CCTTGTCAGGC Num.seqs=6 Similarity=0.842963  
0 CCTTGTCAGGCAAGGAGGTAGGCGTAGGTCA

\*\*\*\*\*

Consensus:

CCTTGTCAGGCAAGGAGGTAGGCGTAGGTCA

>WB235\_Fam\_289\_30\_1 Nr. of seq. 1 Alignment length(with gaps) = 30  
Alignment score = 0.000000  
WB235\_3:13268025-13268308 Satlength=284 Nr of Repeats=8 RepeatLength=30  
seed=TTTCAGGCCA Num.seqs=5 Similarity=0.822222  
0 TTTCAGGCCAATTCNGTCATTTTTGGACA

\*\*\*\*\*

Consensus:

TTTCAGGCCAATTCNGTCATTTTTGGACA

>WB235\_Fam\_290\_30\_1 Nr. of seq. 1 Alignment length(with gaps) = 30  
Alignment score = 0.000000  
WB235\_4:16649049-16649496 Satlength=448 Nr of Repeats=15 RepeatLength=30  
seed=AAAAATCAAAA Num.seqs=12 Similarity=0.938721  
0 AAAATCAAAAATTAGATGAATTTTCGATTA

\*\*\*\*\*

Consensus:

AAAAATCAAAAATTAGATGAATTTTCGATTA

>WB235\_Fam\_291\_30\_1 Nr. of seq. 1 Alignment length(with gaps) = 30  
Alignment score = 0.000000

WB235\_5:20246749-20247078 Satlength=330 Nr of Repeats=11 RepeatLength=30  
seed=CTCAAATTTG Num.seqs=10 Similarity=0.911111  
0 CTCAAATTTGCACTAAAAATTCCAATTTTT

\*\*\*\*\*

Consensus:

CTCAAATTTGCACTAAAAATTCCAATTTTT

>WB235\_Fam\_292\_30\_1 Nr. of seq. 1 Alignment length(with gaps) = 30  
Alignment score = 0.000000  
WB235\_6:1548656-1549346 Satlength=691 Nr of Repeats=19 RepeatLength=30  
seed=ACTACCCAAC Num.seqs=18 Similarity=0.923021  
0 ACTACCCAACCGGCTCCGGCAACCAGTCCA

\*\*\*\*\*

Consensus:

ACTACCCAACCGGCTCCGGCAACCAGTCCA

>WB235\_Fam\_293\_29\_1 Nr. of seq. 1 Alignment length(with gaps) = 29  
Alignment score = 0.000000  
WB235\_3:10636973-10637342 Satlength=370 Nr of Repeats=11 RepeatLength=29  
seed=GGCCTAGAAA Num.seqs=7 Similarity=0.700055  
0 GGCCTAGAAANTTCTATTTGAAAGTTGAT

\*\*\*\*\*

Consensus:

GGCCTAGAAANTTCTATTTGAAAGTTGAT

>WB235\_Fam\_294\_29\_1 Nr. of seq. 1 Alignment length(with gaps) = 29  
Alignment score = 0.000000  
WB235\_4:13964027-13964143 Satlength=117 Nr of Repeats=4 RepeatLength=29  
seed=TACATTGCAA Num.seqs=4 Similarity=0.946360  
0 TACATTGCAAGATCTTCTTACTATGTAGG

\*\*\*\*\*

Consensus:

TACATTGCAAGATCTTCTTACTATGTAGG

>WB235\_Fam\_295\_29\_1 Nr. of seq. 1 Alignment length(with gaps) = 29  
Alignment score = 0.000000  
WB235\_5:19278568-19278735 Satlength=168 Nr of Repeats=5 RepeatLength=29  
seed=CTCGTCAGTG Num.seqs=4 Similarity=0.954023  
0 CTCGTCAGTGGGTGGACGAGGAATGAGCG

\*\*\*\*\*

Consensus:

CTCGTCAGTGGGTGGACGAGGAATGAGCG



>WB235\_Fam\_296\_28\_1 Nr. of seq. 1 Alignment length(with gaps) = 28  
Alignment score = 0.000000  
WB235\_2:2980111-2980251 Satlength=141 Nr of Repeats=5 RepeatLength=28  
seed=AATGTCGGCT Num.seqs=5 Similarity=0.847619  
0 AATGTCGGCTGCTTCTAGAAACCAGGCA

\*\*\*\*\*  
Consensus:

AATGTCGGCTGCTTCTAGAAACCAGGCA

>WB235\_Fam\_297\_28\_1 Nr. of seq. 1 Alignment length(with gaps) = 28  
Alignment score = 0.000000  
WB235\_2:3415307-3415447 Satlength=141 Nr of Repeats=4 RepeatLength=28  
seed=TGCCTCGCCT Num.seqs=3 Similarity=0.968254  
0 TGCCTCGCCTACGTGCTTATTTTCAGGCA

\*\*\*\*\*  
Consensus:

TGCCTCGCCTACGTGCTTATTTTCAGGCA

>WB235\_Fam\_298\_28\_1 Nr. of seq. 1 Alignment length(with gaps) = 28  
Alignment score = 0.000000  
WB235\_5:18447331-18447583 Satlength=253 Nr of Repeats=9 RepeatLength=28  
seed=CCAAGAGAAT Num.seqs=9 Similarity=0.915344  
0 CCAAGAGAATTTCAACCACCTGGAAATT

\*\*\*\*\*  
Consensus:

CCAAGAGAATTTCAACCACCTGGAAATT

>WB235\_Fam\_299\_27\_1 Nr. of seq. 1 Alignment length(with gaps) = 27  
Alignment score = 0.000000  
WB235\_2:13668387-13668731 Satlength=345 Nr of Repeats=12 RepeatLength=27  
seed=TTCCGGCAAA Num.seqs=8 Similarity=0.904762  
0 TTCCGGCAAATCGGCAAATTGCAAAAT

\*\*\*\*\*  
Consensus:

TTCCGGCAAATCGGCAAATTGCAAAAT

>WB235\_Fam\_300\_27\_1 Nr. of seq. 1 Alignment length(with gaps) = 27  
Alignment score = 0.000000  
WB235\_4:12500507-12500642 Satlength=136 Nr of Repeats=5 RepeatLength=27  
seed=ACAATAAAGT Num.seqs=5 Similarity=1.000000  
0 ACAATAAAGTACTATGTATTACCGTAT

\*\*\*\*\*  
Consensus:

ACAATAAAGTACTATGTATTACCGTAT

>WB235\_Fam\_301\_27\_1 Nr. of seq. 1 Alignment length(with gaps) = 27  
Alignment score = 0.000000  
WB235\_6:10973510-10974510 Satlength=1001 Nr of Repeats=30 RepeatLength=27  
seed=CACTGACCAA Num.seqs=21 Similarity=0.803410  
0 CACTGACCAAAGAAAATATTANACGTG

\*\*\*\*\*

Consensus:

CACTGACCAAAGAAAATATTANACGTG

>WB235\_Fam\_302\_26\_1 Nr. of seq. 1 Alignment length(with gaps) = 26  
Alignment score = 0.000000  
WB235\_1:3117070-3117200 Satlength=131 Nr of Repeats=4 RepeatLength=26  
seed=GGCAGGCGTC Num.seqs=3 Similarity=0.931624  
0 GGCAGGCGTCAAGCAGGCAGGTTTCA

\*\*\*\*\*

Consensus:

GGCAGGCGTCAAGCAGGCAGGTTTCA

>WB235\_Fam\_303\_26\_1 Nr. of seq. 1 Alignment length(with gaps) = 26  
Alignment score = 0.000000  
WB235\_1:11312599-11313143 Satlength=545 Nr of Repeats=18 RepeatLength=26  
seed=ACCTACAGTA Num.seqs=12 Similarity=0.881896  
0 ACCTACAGTACCCCTGTCCTAGAATG

\*\*\*\*\*

Consensus:

ACCTACAGTACCCCTGTCCTAGAATG

>WB235\_Fam\_304\_26\_1 Nr. of seq. 1 Alignment length(with gaps) = 26  
Alignment score = 0.000000  
WB235\_2:1178522-1178806 Satlength=285 Nr of Repeats=8 RepeatLength=26  
seed=TACTGTAGTT Num.seqs=5 Similarity=0.621429  
0 TACTGTAGTTTGACCTACTTANGGAT

\*\*\*\*\*

Consensus:

TACTGTAGTTTGACCTACTTANGGAT

>WB235\_Fam\_305\_26\_1 Nr. of seq. 1 Alignment length(with gaps) = 26  
Alignment score = 0.000000  
WB235\_2:1892810-1893486 Satlength=677 Nr of Repeats=26 RepeatLength=26  
seed=ATTTACGGAG Num.seqs=22 Similarity=0.829282  
0 ATTTACGGAGCTTCAAGCTTGTGTCG

\*\*\*\*\*

Consensus:

ATTTACGGAGCTTCAAGCTTGTGTCG

>WB235\_Fam\_306\_26\_1 Nr. of seq. 1 Alignment length(with gaps) = 26  
Alignment score = 0.000000  
WB235\_5:19065856-19066708 Satlength=853 Nr of Repeats=32 RepeatLength=26  
seed=TGAAATTTCA Num.seqs=23 Similarity=0.906760  
0 TGAAATTTCACAAAATATCGATTTTC

\*\*\*\*\*  
Consensus:

TGAAATTTCACAAAATATCGATTTTC

>WB235\_Fam\_307\_26\_1 Nr. of seq. 1 Alignment length(with gaps) = 26  
Alignment score = 0.000000  
WB235\_6:11260441-11260545 Satlength=105 Nr of Repeats=4 RepeatLength=26  
seed=AAATTAATCT Num.seqs=4 Similarity=0.803419  
0 AAATTAATCTGTCACTCTAACTTTTT

\*\*\*\*\*  
Consensus:

AAATTAATCTGTCACTCTAACTTTTT

>WB235\_Fam\_308\_25\_1 Nr. of seq. 1 Alignment length(with gaps) = 25  
Alignment score = 0.000000  
WB235\_2:1089504-1089883 Satlength=380 Nr of Repeats=5 RepeatLength=26  
seed=GTCGGCTGCT Num.seqs=3 Similarity=0.339869  
0 GTCGGCTGCTTNCAAACCCTGAGTT

\*\*\*\*\*  
Consensus:

GTCGGCTGCTTNCAAACCCTGAGTT

>WB235\_Fam\_309\_25\_1 Nr. of seq. 1 Alignment length(with gaps) = 25  
Alignment score = 0.000000  
WB235\_5:19420419-19420546 Satlength=128 Nr of Repeats=5 RepeatLength=25  
seed=AAAAATCTGT Num.seqs=3 Similarity=0.822222  
0 AAAAATCTGTTCTNNGAGGTCCCTG

\*\*\*\*\*  
Consensus:

AAAAATCTGTTCTNNGAGGTCCCTG

>WB235\_Fam\_310\_24\_1 Nr. of seq. 1 Alignment length(with gaps) = 24  
Alignment score = 0.000000  
WB235\_2:4205778-4205946 Satlength=169 Nr of Repeats=5 RepeatLength=24  
seed=GTGAGGTACG Num.seqs=3 Similarity=0.611111  
0 GTGAGGTACGAGGTGAGGTANGAG

\*\*\*\*\*

Consensus:

GTGAGGTACGAGGTGAGGTANGAG

>WB235\_Fam\_311\_24\_1 Nr. of seq. 1 Alignment length(with gaps) = 24  
Alignment score = 0.000000  
WB235\_3:12397168-12397264 Satlength=97 Nr of Repeats=4 RepeatLength=24  
seed=AAGCACCACC Num.seqs=4 Similarity=0.972222  
0 AAGCACCACCTCCTCCAACACTACAA

\*\*\*\*\*

Consensus:

AAGCACCACCTCCTCCAACACTACAA

>WB235\_Fam\_312\_24\_1 Nr. of seq. 1 Alignment length(with gaps) = 24  
Alignment score = 0.000000  
WB235\_3:13583331-13583502 Satlength=172 Nr of Repeats=7 RepeatLength=24  
seed=AAGAAGGATG Num.seqs=6 Similarity=0.825926  
0 AAGAAGGATGCTGAAGAGAAGAAG

\*\*\*\*\*

Consensus:

AAGAAGGATGCTGAAGAGAAGAAG

>WB235\_Fam\_313\_24\_1 Nr. of seq. 1 Alignment length(with gaps) = 24  
Alignment score = 0.000000  
WB235\_4:2855122-2855338 Satlength=217 Nr of Repeats=5 RepeatLength=24  
seed=GCTTCTGGAG Num.seqs=3 Similarity=0.777778  
0 GCTTCTGGAGCTACAGGTTATCCA

\*\*\*\*\*

Consensus:

GCTTCTGGAGCTACAGGTTATCCA

>WB235\_Fam\_314\_24\_1 Nr. of seq. 1 Alignment length(with gaps) = 24  
Alignment score = 0.000000  
WB235\_4:17323162-17323330 Satlength=169 Nr of Repeats=7 RepeatLength=24  
seed=TCAACAACAA Num.seqs=7 Similarity=1.000000  
0 TCAACAACAACAGGAGAAGCTTCT

\*\*\*\*\*

Consensus:

TCAACAACAACAGGAGAAGCTTCT

>WB235\_Fam\_315\_24\_1 Nr. of seq. 1 Alignment length(with gaps) = 24  
Alignment score = 0.000000  
WB235\_5:6171700-6176164 Satlength=4465 Nr of Repeats=182 RepeatLength=24  
seed=TTTCAGTTTA Num.seqs=178 Similarity=0.769398  
0 TTTCAGTTTATCATCTCTCTG

\*\*\*\*\*

Consensus:

TTTCAGTTTATCATCATTCTCCTG

>WB235\_Fam\_316\_24\_1 Nr. of seq. 1 Alignment length(with gaps) = 24  
Alignment score = 0.000000  
WB235\_6:7879877-7880045 Satlength=169 Nr of Repeats=7 RepeatLength=24  
seed=GGTGGCTGGT Num.seqs=7 Similarity=1.000000  
0 GGTGGCTGGTCACAAAAGTAAGTT

\*\*\*\*\*

Consensus:

GGTGGCTGGTCACAAAAGTAAGTT

>WB235\_Fam\_317\_23\_1 Nr. of seq. 1 Alignment length(with gaps) = 23  
Alignment score = 0.000000  
WB235\_1:14332472-14332641 Satlength=170 Nr of Repeats=5 RepeatLength=23  
seed=GCACCATAAG Num.seqs=3 Similarity=0.726852  
0 GCATCATAAGGATCATAGTTGAT

\*\*\*\*\*

Consensus:

GCATCATAAGGATCATAGTTGAT

>WB235\_Fam\_318\_23\_1 Nr. of seq. 1 Alignment length(with gaps) = 23  
Alignment score = 0.000000  
WB235\_2:1578528-1579311 Satlength=784 Nr of Repeats=24 RepeatLength=23  
seed=CGCTGTAAGA Num.seqs=16 Similarity=0.806763  
0 CGCTGTAAGACCCTTCGCTGTAC

\*\*\*\*\*

Consensus:

CGCTGTAAGACCCTTCGCTGTAC

>WB235\_Fam\_319\_23\_1 Nr. of seq. 1 Alignment length(with gaps) = 23  
Alignment score = 0.000000  
WB235\_2:15278603-15278843 Satlength=241 Nr of Repeats=12 RepeatLength=23  
seed=GCTACAGTAC Num.seqs=8 Similarity=0.821946  
0 GCTACAGTACCCAGCTTGACTT

\*\*\*\*\*

Consensus:

GCTACAGTACCCAGCTTGACTT

>WB235\_Fam\_320\_23\_1 Nr. of seq. 1 Alignment length(with gaps) = 23  
Alignment score = 0.000000

WB235\_5:19487887-19488024 Satlength=138 Nr of Repeats=6 RepeatLength=23  
seed=TTTTCAGAAA Num.seqs=5 Similarity=0.631944  
0 TTTTCAGAAATAGGTATTTTCAGA

\*\*\*\*\*

Consensus:

TTTTCAGAAATAGGTATTTTCAGA

>WB235\_Fam\_321\_22\_1 Nr. of seq. 1 Alignment length(with gaps) = 22  
Alignment score = 0.000000

WB235\_1:808432-808756 Satlength=325 Nr of Repeats=8 RepeatLength=22  
seed=TTAAAATTTT Num.seqs=6 Similarity=0.886869  
0 TTAAAATTTTGTTCAGTTTGACC

\*\*\*\*\*

Consensus:

TTAAAATTTTGTTCAGTTTGACC

>WB235\_Fam\_322\_22\_1 Nr. of seq. 1 Alignment length(with gaps) = 22  
Alignment score = 0.000000

WB235\_1:14267336-14267775 Satlength=440 Nr of Repeats=17 RepeatLength=22  
seed=GCACGGCCTG Num.seqs=13 Similarity=0.701226  
0 GCACGGCCTGGCGGTCCTGAGG

\*\*\*\*\*

Consensus:

GCACGGCCTGGCGGTCCTGAGG

>WB235\_Fam\_323\_22\_1 Nr. of seq. 1 Alignment length(with gaps) = 22  
Alignment score = 0.000000

WB235\_2:14114648-14115030 Satlength=383 Nr of Repeats=12 RepeatLength=22  
seed=CTACAGTAAC Num.seqs=8 Similarity=0.798395  
0 CTACAGTAACCCTAGTATTGAA

\*\*\*\*\*

Consensus:

CTACAGTAACCCTAGTATTGAA

>WB235\_Fam\_324\_22\_1 Nr. of seq. 1 Alignment length(with gaps) = 22  
Alignment score = 0.000000

WB235\_4:6599056-6599139 Satlength=84 Nr of Repeats=4 RepeatLength=22  
seed=AAGCGGTAAC Num.seqs=3 Similarity=1.000000  
0 AAGCGGTAACGTCGTCTATATA

\*\*\*\*\*

Consensus:

AAGCGGTAACGTCGTCTATATA

>WB235\_Fam\_325\_22\_1 Nr. of seq. 1 Alignment length(with gaps) = 22  
Alignment score = 0.000000  
WB235\_5:16945467-16945572 Satlength=106 Nr of Repeats=5 RepeatLength=21  
seed=TGCTAATTAG Num.seqs=3 Similarity=0.545455  
0 TGCTAATTAGCGCGGNTGCGTN

\*\*\*\*\*  
Consensus:

TGCTAATTAGCGCGGNTGCGTN

>WB235\_Fam\_326\_22\_1 Nr. of seq. 1 Alignment length(with gaps) = 22  
Alignment score = 0.000000  
WB235\_5:19427400-19427634 Satlength=235 Nr of Repeats=7 RepeatLength=22  
seed=ACGTATACAG Num.seqs=5 Similarity=0.915152  
0 ACGTATACAGGCATATACACAT

\*\*\*\*\*  
Consensus:

ACGTATACAGGCATATACACAT

>WB235\_Fam\_327\_22\_1 Nr. of seq. 1 Alignment length(with gaps) = 22  
Alignment score = 0.000000  
WB235\_6:1916196-1916614 Satlength=419 Nr of Repeats=14 RepeatLength=22  
seed=CCGGCGTG TGT Num.seqs=9 Similarity=0.677134  
0 CCGGCGTG TGTNTTGAAGCGGTC

\*\*\*\*\*  
Consensus:

CCGGCGTG TGTNTTGAAGCGGTC

>WB235\_Fam\_328\_22\_1 Nr. of seq. 1 Alignment length(with gaps) = 22  
Alignment score = 0.000000  
WB235\_6:14638909-14639063 Satlength=155 Nr of Repeats=5 RepeatLength=22  
seed=TTTGTGGGAG Num.seqs=3 Similarity=0.757576  
0 TTTGTGGGAGGCGACATATACC

\*\*\*\*\*  
Consensus:

TTTGTGGGAGGCGACATATACC

>WB235\_Fam\_329\_21\_1 Nr. of seq. 1 Alignment length(with gaps) = 21  
Alignment score = 0.000000  
WB235\_1:823801-824454 Satlength=654 Nr of Repeats=29 RepeatLength=21  
seed=TGGCCTAGAT Num.seqs=21 Similarity=0.658586  
0 TGGCCTAGATTTNTTTACAGGG

\*\*\*\*\*  
Consensus:

TGGCCTAGATTTNTTTACAGGG

>WB235\_Fam\_330\_21\_1 Nr. of seq. 1 Alignment length(with gaps) = 21  
Alignment score = 0.000000  
WB235\_1:1652306-1652642 Satlength=337 Nr of Repeats=16 RepeatLength=21  
seed=TCTCCTGGTA Num.seqs=16 Similarity=0.963492  
0 TCTCCTGGTAAATTTAAAAAT

\*\*\*\*\*

Consensus:

TCTCCTGGTAAATTTAAAAAT

>WB235\_Fam\_331\_21\_1 Nr. of seq. 1 Alignment length(with gaps) = 21  
Alignment score = 0.000000  
WB235\_1:12585721-12585826 Satlength=106 Nr of Repeats=5 RepeatLength=21  
seed=ACCACCCCTA Num.seqs=5 Similarity=0.815873  
0 ACCACCCCTACAACNACCACC

\*\*\*\*\*

Consensus:

ACCACCCCTACAACNACCACC

>WB235\_Fam\_332\_21\_1 Nr. of seq. 1 Alignment length(with gaps) = 21  
Alignment score = 0.000000  
WB235\_1:15025277-15025549 Satlength=273 Nr of Repeats=10 RepeatLength=21  
seed=AACTTTTGG Num.seqs=6 Similarity=0.791919  
0 AACTTTTGGCAATTTTCCAA

\*\*\*\*\*

Consensus:

AACTTTTGGCAATTTTCCAA

>WB235\_Fam\_333\_21\_1 Nr. of seq. 1 Alignment length(with gaps) = 21  
Alignment score = 0.000000  
WB235\_2:2273842-2274055 Satlength=214 Nr of Repeats=8 RepeatLength=21  
seed=TGTGCCCTGG Num.seqs=6 Similarity=0.936508  
0 TGTGCCCTGGAAAGCTGGCAG

\*\*\*\*\*

Consensus:

TGTGCCCTGGAAAGCTGGCAG

>WB235\_Fam\_334\_21\_1 Nr. of seq. 1 Alignment length(with gaps) = 21  
Alignment score = 0.000000  
WB235\_2:4054458-4054819 Satlength=362 Nr of Repeats=4 RepeatLength=21  
seed=CTACGTAAGA Num.seqs=3 Similarity=0.830688  
0 CTACGTAAGAGTAGCGCAGGA

\*\*\*\*\*

Consensus:



CTACGTAAGAGTAGCGCAGGA

>WB235\_Fam\_335\_21\_1 Nr. of seq. 1 Alignment length(with gaps) = 21  
Alignment score = 0.000000  
WB235\_2:13184130-13184277 Satlength=148 Nr of Repeats=7 RepeatLength=21  
seed=AATCTAGCCA Num.seqs=7 Similarity=0.930461  
0 AATCTAGCCAGACGCACACCT

\*\*\*\*\*  
Consensus:

AATCTAGCCAGACGCACACCT

>WB235\_Fam\_336\_21\_1 Nr. of seq. 1 Alignment length(with gaps) = 21  
Alignment score = 0.000000  
WB235\_2:14212202-14212432 Satlength=231 Nr of Repeats=10 RepeatLength=21  
seed=CAATTTTCTG Num.seqs=8 Similarity=0.841270  
0 CAATTTTCTGTTNAACTTTGA

\*\*\*\*\*  
Consensus:

CAATTTTCTGTTNAACTTTGA

>WB235\_Fam\_337\_21\_1 Nr. of seq. 1 Alignment length(with gaps) = 21  
Alignment score = 0.000000  
WB235\_3:8254497-8254602 Satlength=106 Nr of Repeats=5 RepeatLength=21  
seed=AAGTTTACT Num.seqs=5 Similarity=0.974603  
0 AAGTTTACTTTGATTTTTTT

\*\*\*\*\*  
Consensus:

AAGTTTACTTTGATTTTTTT

>WB235\_Fam\_338\_21\_1 Nr. of seq. 1 Alignment length(with gaps) = 21  
Alignment score = 0.000000  
WB235\_3:11242813-11243253 Satlength=441 Nr of Repeats=21 RepeatLength=21  
seed=GGCAATTTTC Num.seqs=20 Similarity=0.903425  
0 GGCAATTTTCCAGTGCAATTC

\*\*\*\*\*  
Consensus:

GGCAATTTTCCAGTGCAATTC

>WB235\_Fam\_339\_21\_1 Nr. of seq. 1 Alignment length(with gaps) = 21  
Alignment score = 0.000000  
WB235\_4:1565274-1565421 Satlength=148 Nr of Repeats=7 RepeatLength=21  
seed=CCATAGGTGG Num.seqs=7 Similarity=0.794407  
0 CCATAGGTGGAAGATCTNATA

\*\*\*\*\*

Consensus:

CCATAGGTGGAAGATCTNATA

>WB235\_Fam\_340\_21\_1 Nr. of seq. 1 Alignment length(with gaps) = 21  
Alignment score = 0.000000  
WB235\_4:2156341-2157203 Satlength=863 Nr of Repeats=38 RepeatLength=21  
seed=GATTTACGGG Num.seqs=31 Similarity=0.686520  
0 GATTTACGGGGTGAACATGTG

\*\*\*\*\*

Consensus:

GATTTACGGGGTGAACATGTG

>WB235\_Fam\_341\_21\_1 Nr. of seq. 1 Alignment length(with gaps) = 21  
Alignment score = 0.000000  
WB235\_5:6392866-6392950 Satlength=85 Nr of Repeats=4 RepeatLength=21  
seed=TTGGTGACAA Num.seqs=4 Similarity=1.000000  
0 TTGGTGACAATGTGGAAACAA

\*\*\*\*\*

Consensus:

TTGGTGACAATGTGGAAACAA

>WB235\_Fam\_342\_21\_1 Nr. of seq. 1 Alignment length(with gaps) = 21  
Alignment score = 0.000000  
WB235\_5:9933015-9933120 Satlength=106 Nr of Repeats=5 RepeatLength=21  
seed=TTCTAATTCG Num.seqs=5 Similarity=0.726984  
0 TTCTAATTCGACGCGCATNGT

\*\*\*\*\*

Consensus:

TTCTAATTCGACGCGCATNGT

>WB235\_Fam\_343\_21\_1 Nr. of seq. 1 Alignment length(with gaps) = 21  
Alignment score = 0.000000  
WB235\_5:16941584-16941761 Satlength=178 Nr of Repeats=5 RepeatLength=21  
seed=CTAATTAGCG Num.seqs=3 Similarity=0.640212  
0 CTAATTAGCGTCGCTTCCNTT

\*\*\*\*\*

Consensus:

CTAATTAGCGTCGCTTCCNTT

>WB235\_Fam\_344\_21\_1 Nr. of seq. 1 Alignment length(with gaps) = 21  
Alignment score = 0.000000  
WB235\_5:18644347-18644921 Satlength=575 Nr of Repeats=24 RepeatLength=21  
seed=AAAAATCGAT Num.seqs=18 Similarity=0.739602  
0 AAAAATCGATAAAATTTGGAN

\*\*\*\*\*

Consensus:

AAAAATCGATAAAATTTGGAN

>WB235\_Fam\_345\_21\_1 Nr. of seq. 1 Alignment length(with gaps) = 21  
Alignment score = 0.000000  
WB235\_5:19261027-19261174 Satlength=148 Nr of Repeats=7 RepeatLength=21  
seed=CACACGAGCT Num.seqs=7 Similarity=0.727891  
0 CACACGAGCTTGAGAGCCCGG

\*\*\*\*\*

Consensus:

CACACGAGCTTGAGAGCCCGG

>WB235\_Fam\_346\_21\_1 Nr. of seq. 1 Alignment length(with gaps) = 21  
Alignment score = 0.000000  
WB235\_5:19427290-19427806 Satlength=517 Nr of Repeats=5 RepeatLength=21  
seed=TATTTTCAAA Num.seqs=3 Similarity=0.957672  
0 TATTTTCAAAAAAATTTAAAA

\*\*\*\*\*

Consensus:

TATTTTCAAAAAAATTTAAAA

>WB235\_Fam\_347\_21\_1 Nr. of seq. 1 Alignment length(with gaps) = 21  
Alignment score = 0.000000  
WB235\_5:19645096-19645264 Satlength=169 Nr of Repeats=6 RepeatLength=21  
seed=ACCCCGATTT Num.seqs=5 Similarity=0.911111  
0 ACCCCGATTTTCACCCAAAAA

\*\*\*\*\*

Consensus:

ACCCCGATTTTCACCCAAAAA

>WB235\_Fam\_348\_21\_1 Nr. of seq. 1 Alignment length(with gaps) = 21  
Alignment score = 0.000000  
WB235\_5:19963720-19963804 Satlength=85 Nr of Repeats=4 RepeatLength=21  
seed=CTCAATTCAA Num.seqs=4 Similarity=0.883598  
0 CTCAATTCAATCAAGGAAATC

\*\*\*\*\*

Consensus:

CTCAATTCAATCAAGGAAATC

>WB235\_Fam\_349\_21\_1 Nr. of seq. 1 Alignment length(with gaps) = 21  
Alignment score = 0.000000

WB235\_6:3713912-3714032 Satlength=121 Nr of Repeats=5 RepeatLength=20  
seed=CCATGTAGCT Num.seqs=4 Similarity=0.561869  
0 CCATGTAGCTTCAAAATTNCT

\*\*\*\*\*

Consensus:

CCATGTAGCTTCAAAATTNCT

>WB235\_Fam\_350\_21\_1 Nr. of seq. 1 Alignment length(with gaps) = 21  
Alignment score = 0.000000  
WB235\_6:15507328-15507477 Satlength=150 Nr of Repeats=4 RepeatLength=21  
seed=TGTCCGTGAT Num.seqs=3 Similarity=0.666667  
0 TGTCCGTGATGATCATGNGCA

\*\*\*\*\*

Consensus:

TGTCCGTGATGATCATGNGCA

>WB235\_Fam\_351\_21\_1 Nr. of seq. 1 Alignment length(with gaps) = 21  
Alignment score = 0.000000  
WB235\_6:17087637-17087742 Satlength=106 Nr of Repeats=5 RepeatLength=21  
seed=GGTGGACCCA Num.seqs=5 Similarity=0.822222  
0 GGTGGACCCANGGGTTCCTAG

\*\*\*\*\*

Consensus:

GGTGGACCCANGGGTTCCTAG

>WB235\_Fam\_352\_20\_1 Nr. of seq. 1 Alignment length(with gaps) = 20  
Alignment score = 0.000000  
WB235\_2:3641762-3641852 Satlength=91 Nr of Repeats=5 RepeatLength=20  
seed=CTATCGCCTG Num.seqs=4 Similarity=0.833333  
0 CTATCGCCTGCTATCGCCTA

\*\*\*\*\*

Consensus:

CTATCGCCTGCTATCGCCTA

>WB235\_Fam\_353\_20\_1 Nr. of seq. 1 Alignment length(with gaps) = 20  
Alignment score = 0.000000  
WB235\_5:17780829-17781140 Satlength=312 Nr of Repeats=5 RepeatLength=20  
seed=ATTGACCTA Num.seqs=4 Similarity=0.900000  
0 ATTGACCTACTTTTTAAAA

\*\*\*\*\*

Consensus:

ATTGACCTACTTTTTAAAA

>WB235\_Fam\_354\_19\_1 Nr. of seq. 1 Alignment length(with gaps) = 19  
Alignment score = 0.000000  
WB235\_1:359078-359230 Satlength=153 Nr of Repeats=8 RepeatLength=19  
seed=GTACTACCTT Num.seqs=8 Similarity=0.982456  
0 GTACTACCTTTTAATGTAT

\*\*\*\*\*  
Consensus:

GTACTACCTTTTAATGTAT

>WB235\_Fam\_355\_19\_1 Nr. of seq. 1 Alignment length(with gaps) = 19  
Alignment score = 0.000000  
WB235\_1:14137893-14138026 Satlength=134 Nr of Repeats=7 RepeatLength=19  
seed=CCCTGATACC Num.seqs=7 Similarity=0.788889  
0 CCCTGATACCCCCTAGTCC

\*\*\*\*\*  
Consensus:

CCCTGATACCCCCTAGTCC

>WB235\_Fam\_356\_19\_1 Nr. of seq. 1 Alignment length(with gaps) = 19  
Alignment score = 0.000000  
WB235\_2:13007141-13007285 Satlength=145 Nr of Repeats=6 RepeatLength=19  
seed=TATGGTGCAT Num.seqs=4 Similarity=0.707602  
0 TATGGTGCATCTAACTAGT

\*\*\*\*\*  
Consensus:

TATGGTGCATCTAACTAGT

>WB235\_Fam\_357\_19\_1 Nr. of seq. 1 Alignment length(with gaps) = 19  
Alignment score = 0.000000  
WB235\_4:3206393-3209585 Satlength=3193 Nr of Repeats=168 RepeatLength=19  
seed=GCCTCACTCA Num.seqs=132 Similarity=0.897464  
0 GCCTCACTCAAAATCCTCA

\*\*\*\*\*  
Consensus:

GCCTCACTCAAAATCCTCA

>WB235\_Fam\_358\_18\_1 Nr. of seq. 1 Alignment length(with gaps) = 18  
Alignment score = 0.000000  
WB235\_1:10650908-10650980 Satlength=73 Nr of Repeats=4 RepeatLength=18  
seed=AAAAGTTACA Num.seqs=4 Similarity=1.000000  
0 AAAAGTTACAGTGTCTT

\*\*\*\*\*  
Consensus:

AAAAGTTACAGTGTCTT

>WB235\_Fam\_359\_18\_1 Nr. of seq. 1 Alignment length(with gaps) = 18  
Alignment score = 0.000000  
WB235\_1:14338207-14338743 Satlength=537 Nr of Repeats=26 RepeatLength=18  
seed=TTGTAGATCA Num.seqs=22 Similarity=0.869489  
0 TTGTAGATCAACGGGGTC

\*\*\*\*\*

Consensus:

TTGTAGATCAACGGGGTC

>WB235\_Fam\_360\_18\_1 Nr. of seq. 1 Alignment length(with gaps) = 18  
Alignment score = 0.000000  
WB235\_2:1467853-1467943 Satlength=91 Nr of Repeats=5 RepeatLength=18  
seed=GGAGGTCCAG Num.seqs=5 Similarity=0.859259  
0 GGAGGTCCAGGTACCCCG

\*\*\*\*\*

Consensus:

GGAGGTCCAGGTACCCCG

>WB235\_Fam\_361\_18\_1 Nr. of seq. 1 Alignment length(with gaps) = 18  
Alignment score = 0.000000  
WB235\_2:10466292-10466385 Satlength=94 Nr of Repeats=5 RepeatLength=18  
seed=TAAATAAGTG Num.seqs=3 Similarity=0.950617  
0 TAAATAAGTGGCTATAAT

\*\*\*\*\*

Consensus:

TAAATAAGTGGCTATAAT

>WB235\_Fam\_362\_18\_1 Nr. of seq. 1 Alignment length(with gaps) = 18  
Alignment score = 0.000000  
WB235\_2:12889260-12889656 Satlength=397 Nr of Repeats=21 RepeatLength=18  
seed=ACTACTGTAT Num.seqs=18 Similarity=0.797628  
0 ACTACTGTATCNCAGGAG

\*\*\*\*\*

Consensus:

ACTACTGTATCNCAGGAG

>WB235\_Fam\_363\_18\_1 Nr. of seq. 1 Alignment length(with gaps) = 18  
Alignment score = 0.000000  
WB235\_4:3195411-3195573 Satlength=163 Nr of Repeats=6 RepeatLength=18  
seed=CCTTCGCCTA Num.seqs=4 Similarity=0.765432  
0 CCTTCGCCTACCTACGTG

\*\*\*\*\*

Consensus:

CCTTCGCCTACCTACGTG

>WB235\_Fam\_364\_18\_1 Nr. of seq. 1 Alignment length(with gaps) = 18  
Alignment score = 0.000000  
WB235\_4:4335057-4335129 Satlength=73 Nr of Repeats=4 RepeatLength=18  
seed=TTTTTTGATA Num.seqs=4 Similarity=0.962963  
0 TTTTTTGATAATTCTTGA

\*\*\*\*\*  
Consensus:

TTTTTTGATAATTCTTGA

>WB235\_Fam\_365\_18\_1 Nr. of seq. 1 Alignment length(with gaps) = 18  
Alignment score = 0.000000  
WB235\_5:4268549-4268631 Satlength=83 Nr of Repeats=4 RepeatLength=18  
seed=AAATATTCTT Num.seqs=3 Similarity=0.851852  
0 AAATATTCTTATTTTCAG

\*\*\*\*\*  
Consensus:

AAATATTCTTATTTTCAG

>WB235\_Fam\_366\_18\_1 Nr. of seq. 1 Alignment length(with gaps) = 18  
Alignment score = 0.000000  
WB235\_5:4653023-4653224 Satlength=202 Nr of Repeats=8 RepeatLength=18  
seed=CCTGGCTGTC Num.seqs=5 Similarity=0.607407  
0 CCTGGTTGTCCNTCTNNT

\*\*\*\*\*  
Consensus:

CCTGGTTGTCCNTCTNNT

>WB235\_Fam\_367\_18\_1 Nr. of seq. 1 Alignment length(with gaps) = 18  
Alignment score = 0.000000  
WB235\_5:7337779-7337924 Satlength=146 Nr of Repeats=8 RepeatLength=18  
seed=TTTCATAAGA Num.seqs=7 Similarity=0.943563  
0 TTTCATAAGAAGTAAATN

\*\*\*\*\*  
Consensus:

TTTCATAAGAAGTAAATN

>WB235\_Fam\_368\_18\_1 Nr. of seq. 1 Alignment length(with gaps) = 18  
Alignment score = 0.000000  
WB235\_5:20210955-20211513 Satlength=559 Nr of Repeats=29 RepeatLength=18  
seed=CATTGTCACT Num.seqs=27 Similarity=0.884774  
0 CATTGTCACTTTCTTCTC

\*\*\*\*\*

Consensus:

CATTGTCACTTTCTTCTC

>WB235\_Fam\_369\_18\_1 Nr. of seq. 1 Alignment length(with gaps) = 18  
Alignment score = 0.000000  
WB235\_6:1836329-1837109 Satlength=781 Nr of Repeats=39 RepeatLength=18  
seed=AAGCCTATGC Num.seqs=28 Similarity=0.765628  
0 AAGCCTATGCCTTTCCCA

\*\*\*\*\*

Consensus:

AAGCCTATGCCTTTCCCA

>WB235\_Fam\_370\_17\_1 Nr. of seq. 1 Alignment length(with gaps) = 17  
Alignment score = 0.000000  
WB235\_2:12575393-12575478 Satlength=86 Nr of Repeats=5 RepeatLength=17  
seed=ACTTGGTACA Num.seqs=5 Similarity=0.890196  
0 ACTTGGTACATAGGCCA

\*\*\*\*\*

Consensus:

ACTTGGTACATAGGCCA

>WB235\_Fam\_371\_17\_1 Nr. of seq. 1 Alignment length(with gaps) = 17  
Alignment score = 0.000000  
WB235\_3:12389240-12389685 Satlength=446 Nr of Repeats=15 RepeatLength=17  
seed=ATTTTTTCCG Num.seqs=10 Similarity=0.687449  
0 ATTTTTTCCGCAAGTAG

\*\*\*\*\*

Consensus:

ATTTTTTCCGCAAGTAG

>WB235\_Fam\_372\_17\_1 Nr. of seq. 1 Alignment length(with gaps) = 17  
Alignment score = 0.000000  
WB235\_4:11615692-11615955 Satlength=264 Nr of Repeats=13 RepeatLength=17  
seed=AAAATCAAAC Num.seqs=10 Similarity=0.809259  
0 AAAATCAAACCGCGGA

\*\*\*\*\*

Consensus:

AAAATCAAACCGCGGA

>WB235\_Fam\_373\_17\_1 Nr. of seq. 1 Alignment length(with gaps) = 17  
Alignment score = 0.000000  
WB235\_5:4866206-4866377 Satlength=172 Nr of Repeats=5 RepeatLength=17  
seed=AAATGCCAAA Num.seqs=3 Similarity=0.641975  
0 AAATGCCAAAANTGCCA



\*\*\*\*\*

Consensus:

AAATGCCAAAANTGCCA

>WB235\_Fam\_374\_17\_1 Nr. of seq. 1 Alignment length(with gaps) = 17  
Alignment score = 0.000000  
WB235\_5:16672548-16672735 Satlength=188 Nr of Repeats=11 RepeatLength=17  
seed=TAACCTGACT Num.seqs=11 Similarity=0.957219  
0 TAACCTGACTGCTACAG

\*\*\*\*\*

Consensus:

TAACCTGACTGCTACAG

>WB235\_Fam\_375\_17\_1 Nr. of seq. 1 Alignment length(with gaps) = 17  
Alignment score = 0.000000  
WB235\_5:19402253-19402490 Satlength=238 Nr of Repeats=14 RepeatLength=17  
seed=GAATTAGAAA Num.seqs=13 Similarity=0.554584  
0 GAATTAGAAAAATTTGA

\*\*\*\*\*

Consensus:

GAATTAGAAAAATTTGA

>WB235\_Fam\_376\_17\_1 Nr. of seq. 1 Alignment length(with gaps) = 17  
Alignment score = 0.000000  
WB235\_5:19488506-19489530 Satlength=1025 Nr of Repeats=58 RepeatLength=17  
seed=TTGCAAGAAA Num.seqs=55 Similarity=0.923312  
0 TTGCAAGAAAATCTGCA

\*\*\*\*\*

Consensus:

TTGCAAGAAAATCTGCA

>WB235\_Fam\_377\_17\_1 Nr. of seq. 1 Alignment length(with gaps) = 17  
Alignment score = 0.000000  
WB235\_6:3347373-3347577 Satlength=205 Nr of Repeats=10 RepeatLength=17  
seed=TTTTAACGTG Num.seqs=8 Similarity=0.901961  
0 TTTTAACGTGACCTAGT

\*\*\*\*\*

Consensus:

TTTTAACGTGACCTAGT

>WB235\_Fam\_378\_16\_1 Nr. of seq. 1 Alignment length(with gaps) = 16  
Alignment score = 0.000000

WB235\_1:12562161-12562497 Satlength=337 Nr of Repeats=20 RepeatLength=16  
seed=TGATCTGATG Num.seqs=18 Similarity=0.831699  
0 TGATCTGATGATCTGA

\*\*\*\*\*

Consensus:

TGATCTGATGATCTGA

>WB235\_Fam\_379\_16\_1 Nr. of seq. 1 Alignment length(with gaps) = 16  
Alignment score = 0.000000  
WB235\_1:13093190-13093270 Satlength=81 Nr of Repeats=5 RepeatLength=16  
seed=AATACGGGAA Num.seqs=5 Similarity=1.000000  
0 AATACGGGAATACGGG

\*\*\*\*\*

Consensus:

AATACGGGAATACGGG

>WB235\_Fam\_380\_16\_1 Nr. of seq. 1 Alignment length(with gaps) = 16  
Alignment score = 0.000000  
WB235\_3:1011046-1011124 Satlength=79 Nr of Repeats=5 RepeatLength=16  
seed=TTATAGTGTT Num.seqs=3 Similarity=0.888889  
0 TTATAGTGTTATAGTG

\*\*\*\*\*

Consensus:

TTATAGTGTTATAGTG

>WB235\_Fam\_381\_16\_1 Nr. of seq. 1 Alignment length(with gaps) = 16  
Alignment score = 0.000000  
WB235\_3:3018177-3018907 Satlength=731 Nr of Repeats=5 RepeatLength=16  
seed=TGTATATATA Num.seqs=3 Similarity=1.000000  
0 TGTATATATATATATA

\*\*\*\*\*

Consensus:

TGTATATATATATATA

>WB235\_Fam\_382\_16\_1 Nr. of seq. 1 Alignment length(with gaps) = 16  
Alignment score = 0.000000  
WB235\_5:12077837-12077917 Satlength=81 Nr of Repeats=5 RepeatLength=16  
seed=AAAAATTATT Num.seqs=5 Similarity=1.000000  
0 AAAAATTATTGAATAC

\*\*\*\*\*

Consensus:

AAAAATTATTGAATAC

>WB235\_Fam\_383\_16\_1 Nr. of seq. 1 Alignment length(with gaps) = 16  
Alignment score = 0.000000  
WB235\_5:17653226-17653322 Satlength=97 Nr of Repeats=6 RepeatLength=16  
seed=GAATAATATT Num.seqs=6 Similarity=0.972222  
0 GAATAATATTGGAGAA

\*\*\*\*\*  
Consensus:

GAATAATATTGGAGAA

>WB235\_Fam\_384\_16\_1 Nr. of seq. 1 Alignment length(with gaps) = 16  
Alignment score = 0.000000  
WB235\_5:19753320-19753624 Satlength=305 Nr of Repeats=19 RepeatLength=16  
seed=CTTAGATCTC Num.seqs=19 Similarity=0.931287  
0 CTTAGATCTCAATTCC

\*\*\*\*\*  
Consensus:

CTTAGATCTCAATTCC

>WB235\_Fam\_385\_16\_1 Nr. of seq. 1 Alignment length(with gaps) = 16  
Alignment score = 0.000000  
WB235\_6:2989994-2990074 Satlength=81 Nr of Repeats=5 RepeatLength=16  
seed=AGAGAGTATA Num.seqs=5 Similarity=1.000000  
0 AGAGAGTATAGATTAG

\*\*\*\*\*  
Consensus:

AGAGAGTATAGATTAG

>WB235\_Fam\_386\_15\_1 Nr. of seq. 1 Alignment length(with gaps) = 15  
Alignment score = 0.000000  
WB235\_3:12239290-12239399 Satlength=110 Nr of Repeats=5 RepeatLength=15  
seed=CGACCTGCGA Num.seqs=3 Similarity=0.940741  
0 CGACCTGCGACCTAG

\*\*\*\*\*  
Consensus:

CGACCTGCGACCTAG

>WB235\_Fam\_387\_15\_1 Nr. of seq. 1 Alignment length(with gaps) = 15  
Alignment score = 0.000000  
WB235\_4:13431343-13431418 Satlength=76 Nr of Repeats=5 RepeatLength=15  
seed=CACAGGAGGC Num.seqs=5 Similarity=1.000000  
0 CACAGGAGGCTGGGA

\*\*\*\*\*  
Consensus:

CACAGGAGGCTGGGA

>WB235\_Fam\_388\_14\_1 Nr. of seq. 1 Alignment length(with gaps) = 14  
Alignment score = 0.000000  
WB235\_1:11084941-11085053 Satlength=113 Nr of Repeats=7 RepeatLength=14  
seed=AGCTTGAAGC Num.seqs=5 Similarity=0.800000  
0 AGCTTGAAGCTTGG

\*\*\*\*\*  
Consensus:

AGCTTGAAGCTTGG

>WB235\_Fam\_389\_14\_1 Nr. of seq. 1 Alignment length(with gaps) = 14  
Alignment score = 0.000000  
WB235\_2:7446830-7448192 Satlength=1363 Nr of Repeats=34 RepeatLength=14  
seed=GAAGGATCGG Num.seqs=26 Similarity=0.910916  
0 GAAGGATCGGGCCG

\*\*\*\*\*  
Consensus:

GAAGGATCGGGCCG

>WB235\_Fam\_390\_14\_1 Nr. of seq. 1 Alignment length(with gaps) = 14  
Alignment score = 0.000000  
WB235\_6:7918015-7918071 Satlength=57 Nr of Repeats=4 RepeatLength=14  
seed=TTACCAAAAT Num.seqs=4 Similarity=0.888889  
0 TTACCAAAATCTAA

\*\*\*\*\*  
Consensus:

TTACCAAAATCTAA

>WB235\_Fam\_391\_13\_1 Nr. of seq. 1 Alignment length(with gaps) = 13  
Alignment score = 0.000000  
WB235\_5:19495335-19495400 Satlength=66 Nr of Repeats=5 RepeatLength=13  
seed=TTGGGGTGGG Num.seqs=5 Similarity=1.000000  
0 TTGGGGTGGGCCT

\*\*\*\*\*  
Consensus:

TTGGGGTGGGCCT

>WB235\_Fam\_392\_12\_1 Nr. of seq. 1 Alignment length(with gaps) = 12  
Alignment score = 0.000000  
WB235\_2:13522160-13522220 Satlength=61 Nr of Repeats=5 RepeatLength=12  
seed=AATACCAACC Num.seqs=5 Similarity=0.933333  
0 AATACCAACCAC

\*\*\*\*\*  
Consensus:

AATACCAACCAC

>WB235\_Fam\_393\_12\_1 Nr. of seq. 1 Alignment length(with gaps) = 12  
Alignment score = 0.000000  
WB235\_3:13129352-13129936 Satlength=585 Nr of Repeats=45 RepeatLength=12  
seed=AGTTATATAG Num.seqs=41 Similarity=0.931707  
0 AGTTATATAGTA

\*\*\*\*\*

Consensus:

AGTTATATAGTA

>WB235\_Fam\_394\_12\_1 Nr. of seq. 1 Alignment length(with gaps) = 12  
Alignment score = 0.000000  
WB235\_5:16530645-16530908 Satlength=264 Nr of Repeats=16 RepeatLength=12  
seed=CATTGACTTG Num.seqs=13 Similarity=0.842209  
0 CATTGACTTGAG

\*\*\*\*\*

Consensus:

CATTGACTTGAG

>WB235\_Fam\_395\_11\_1 Nr. of seq. 1 Alignment length(with gaps) = 11  
Alignment score = 0.000000  
WB235\_4:2896505-2896560 Satlength=56 Nr of Repeats=5 RepeatLength=11  
seed=TTGTTTACAA Num.seqs=5 Similarity=1.000000  
0 TTGTTTACAAG

\*\*\*\*\*

Consensus:

TTGTTTACAAG

>WB235\_Fam\_396\_11\_1 Nr. of seq. 1 Alignment length(with gaps) = 11  
Alignment score = 0.000000  
WB235\_5:1249610-1249931 Satlength=322 Nr of Repeats=10 RepeatLength=11  
seed=TACCTACTAG Num.seqs=6 Similarity=0.789899  
0 TACCTACTAGA

\*\*\*\*\*

Consensus:

TACCTACTAGA

>WB235\_Fam\_397\_11\_1 Nr. of seq. 1 Alignment length(with gaps) = 11  
Alignment score = 0.000000  
WB235\_5:10450709-10450922 Satlength=214 Nr of Repeats=19 RepeatLength=11  
seed=AGATACACTT Num.seqs=15 Similarity=0.983838  
0 AGATACACTTC

\*\*\*\*\*

Consensus:

AGATACACTTC

>WB235\_Fam\_398\_11\_1 Nr. of seq. 1 Alignment length(with gaps) = 11  
Alignment score = 0.000000  
WB235\_5:18641364-18641663 Satlength=300 Nr of Repeats=5 RepeatLength=11  
seed=TTTCAGGCCT Num.seqs=3 Similarity=0.796296  
0 TTTCAGGCCTA

\*\*\*\*\*

Consensus:

TTTCAGGCCTA

>WB235\_Fam\_399\_10\_1 Nr. of seq. 1 Alignment length(with gaps) = 10  
Alignment score = 0.000000  
WB235\_1:13968489-13968559 Satlength=71 Nr of Repeats=6 RepeatLength=10  
seed=GATTTTCATA Num.seqs=5 Similarity=1.000000  
0 GATTTTCATA

\*\*\*\*\*

Consensus:

GATTTTCATA

>WB235\_Fam\_400\_10\_1 Nr. of seq. 1 Alignment length(with gaps) = 10  
Alignment score = 0.000000  
WB235\_2:2279378-2279438 Satlength=61 Nr of Repeats=4 RepeatLength=10  
seed=CAGCAGAGTG Num.seqs=3 Similarity=1.000000  
0 CAGCAGAGTG

\*\*\*\*\*

Consensus:

CAGCAGAGTG

>WB235\_Fam\_401\_10\_1 Nr. of seq. 1 Alignment length(with gaps) = 10  
Alignment score = 0.000000  
WB235\_2:3145088-3145138 Satlength=51 Nr of Repeats=4 RepeatLength=10  
seed=AACTTTCGAA Num.seqs=3 Similarity=1.000000  
0 AACTTTCGAA

\*\*\*\*\*

Consensus:

AACTTTCGAA

>WB235\_Fam\_402\_10\_1 Nr. of seq. 1 Alignment length(with gaps) = 10  
Alignment score = 0.000000  
WB235\_5:19495245-19495315 Satlength=71 Nr of Repeats=5 RepeatLength=10  
seed=TGGCGAAAGC Num.seqs=3 Similarity=1.000000  
12 GCTGGCGAAA

\*\*\*\*\*

Consensus:

TGGCGAAAGC
