# Supplementary material for: Unique Features of Satellite DNA Transcription in Different Tissues of Caenorhabditis elegans
Source: MDPI journal article supplement (doi:10.3390/ijms24032970), 2023-02-03
Supplement: s1 [file s1]

| Genome                                                                                                                               | Family name        | Number of sequences | Alignment length | Score    | Consensus without gaps                        |
|--------------------------------------------------------------------------------------------------------------------------------------|--------------------|---------------------|------------------|----------|-----------------------------------------------|
| WB235                                                                                                                                | WB235_Fam_1_35_172 | 172                 | 44               | 0.653800 | AATgAAaATTTCGGCAAATCGGCAAATTGCCGg             |
| WB235                                                                                                                                | WB235_Fam_2_12_169 | 169                 | 14               | 0.769942 | AGGCTTAGGCTT                                  |
| WB235                                                                                                                                | WB235_Fam_3_15_136 | 136                 | 15               | 0.942162 | AGACCCaTCGTGGTG                               |
| WB235                                                                                                                                | WB235_Fam_4_35_115 | 115                 | 45               | 0.601883 | ATTtCCCGCCAAAAtntTTTTCaCaGAAAAATTgA           |
| WB235                                                                                                                                | WB235_Fam_5_40_94  | 94                  | 41               | 0.668164 | AannTTCtnGAACAaTTCcaGAAttTTCtnGAaTTTTCCaG     |
| WB235                                                                                                                                | WB235_Fam_6_11_75  | 75                  | 12               | 0.809099 | GTACTcCTACA                                   |
| WB235                                                                                                                                | WB235_Fam_7_15_70  | 70                  | 15               | 0.826961 | cTCCCCTTTTCGtAG                               |
| WB235                                                                                                                                | WB235_Fam_8_16_50  | 50                  | 16               | 0.867364 | CTACaTGCCTaCaTGC                              |
| WB235                                                                                                                                | WB235_Fam_9_20_46  | 46                  | 20               | 0.797488 | TGttAcACGaAAAAATAGAT                          |
| WB235                                                                                                                                | WB235_Fam_10_25_40 | 40                  | 28               | 0.748245 | TTTACTCTCTGGCTTCaCantATAT                     |
| WB235                                                                                                                                | WB235_Fam_11_20_29 | 29                  | 25               | 0.605057 | tATtGATTTTTcTgnAAATT                          |
| WB235                                                                                                                                | WB235_Fam_12_45_28 | 28                  | 46               | 0.807319 | AAGGATCAGAnCatCAGgAGGTACCCTTgTGATCCTTCGgAgCTG |
| WB235                                                                                                                                | WB235_Fam_13_43_26 | 26                  | 47               | 0.705990 | TTTGCCGAAAATTTTcAaTTCGGAATTTGCCGgTTTGCCGA     |
| WB235                                                                                                                                | WB235_Fam_14_11_23 | 23                  | 12               | 0.800725 | TTTTGCGACATT                                  |
| WB235                                                                                                                                | WB235_Fam_15_31_22 | 22                  | 33               | 0.785911 | TAAATAtTTAGCAGACCAaAgtTgGGTaTGC               |
| WB235                                                                                                                                | WB235_Fam_16_26_20 | 20                  | 26               | 0.760324 | cAGAGTCActatTTTtGGTGAAcGGc                    |
| WB235                                                                                                                                | WB235_Fam_17_37_19 | 19                  | 43               | 0.743370 | GGGAATTCAAATTTTAATTTTtGAAAAatATTTTGGC         |
| WB235                                                                                                                                | WB235_Fam_18_19_17 | 17                  | 19               | 0.859649 | CAAGGCActAGAAtTGCGc                           |
| WB235                                                                                                                                | WB235_Fam_19_14_17 | 17                  | 14               | 0.892682 | ACTACAaACTACAA                                |
| WB235                                                                                                                                | WB235_Fam_20_12_15 | 15                  | 14               | 0.745805 | TGTATATGTATA                                  |
| WB235                                                                                                                                | WB235_Fam_21_18_14 | 14                  | 18               | 0.786121 | TGCAgACTAaTAGaGac                             |
| WB235                                                                                                                                | WB235_Fam_22_59_11 | 11                  | 62               | 0.794330 |                                               |
| AAAACAGTGCACATTTgAAATTCATATTcTCCATAATTCTCaGTTTAAAAaTTTTG                                                                             |                    |                     |                  |          |                                               |
| WB235                                                                                                                                | WB235_Fam_23_32_11 | 11                  | 35               | 0.789437 | CTACAAACTACAAnTTTTGGGCGCTGCTaAgA              |
| WB235                                                                                                                                | WB235_Fam_24_20_11 | 11                  | 21               | 0.822222 | CtAGGCAGACCTAGCCTACC                          |
| WB235                                                                                                                                | WB235_Fam_25_12_11 | 11                  | 12               | 0.746970 | ACgCGacACGCA                                  |
| WB235                                                                                                                                | WB235_Fam_26_26_10 | 10                  | 27               | 0.768999 | TTAGAcCatTAGATGAATTtccAAAG                    |
| WB235                                                                                                                                | WB235_Fam_27_21_10 | 10                  | 23               | 0.611433 | ATGCACTGACCAAaanTatga                         |
| WB235                                                                                                                                | WB235_Fam_28_163_9 | 9                   | 170              | 0.739924 |                                               |
| ATCATATggAGTcATTCTTTTTtATTTcATAAACTGTTcAGcATAGtCAAaaTACCAGAAaATgCcAAaCAAAGTATanTAGCTTGTACGGAAGTattTTTTTAAAAAtgAtaaAAATatAtAAAAGCTGaT |                    |                     |                  |          |                                               |
| tTTTTCAAAAATTCAAAAGTAngggAAA                                                                                                         |                    |                     |                  |          |                                               |
| WB235                                                                                                                                | WB235_Fam_29_42_9  | 9                   | 42               | 0.733686 | CngaAAATTTcgaaAACCGCAATTGCCgAAaTTGCCGAntg     |
| WB235                                                                                                                                | WB235_Fam_30_31_9  | 9                   | 37               | 0.708709 | ATTTCGCCCAAAAAAtTgaCTGAAAATTTGA               |
| WB235                                                                                                                                | WB235_Fam_31_26_9  | 9                   | 26               | 0.798789 | CATTgCGGCgGATTtAgaAAAaTGG                     |
| WB235                                                                                                                                | WB235_Fam_32_18_9  | 9                   | 23               | 0.628019 | cAAAAATCaATAATTTCa                            |
| WB235                                                                                                                                | WB235_Fam_33_18_9  | 9                   | 19               | 0.838207 | ATTAGCAGCGcCCAAAAa                            |
| WB235                                                                                                                                | WB235_Fam_34_12_9  | 9                   | 15               | 0.680247 | CTATACCTATAc                                  |
| WB235                                                                                                                                | WB235_Fam_35_14_9  | 9                   | 14               | 0.904762 | GCTATaCGCTATaC                                |
| WB235                                                                                                                                | WB235_Fam_36_12_9  | 9                   | 12               | 0.876543 | TCTAaGTCTAaG                                  |
| WB235                                                                                                                                | WB235_Fam_37_21_8  | 8                   | 23               | 0.616977 | CAAATTTTgAcnTAAAAATnT                         |
| WB235                                                                                                                                | WB235_Fam_38_18_8  | 8                   | 19               | 0.681391 | TAAGCCTAAGcCTaAgCc                            |
| WB235                                                                                                                                | WB235_Fam_39_10_8  | 8                   | 11               | 0.758117 | GCGgtAGCGG                                    |
| WB235                                                                                                                                | WB235_Fam_40_166_7 | 7                   | 173              | 0.741077 |                                               |
| tAtcAAtTTTcAGacGCGCTAgaGgGGTTTTTGTcTtGAaTTCCAATTTcaACagntatannAGGCnCAAAAAACAAAAATAAAaTTtTGGAaTTtnGGAnAATTTTTATAGATTGgATTCTAGATTnTTTA |                    |                     |                  |          |                                               |
| AAAATATTaTTGGTAaGTTTtTGgaCCaagA                                                                                                      |                    |                     |                  |          |                                               |
| WB235                                                                                                                                | WB235_Fam_41_95_7  | 7                   | 96               | 0.868386 |                                               |
| AGGGCCGCAGGCCCGAAAtACTcTGGAAACtAtGGGCTgGCTTTaATCCTATTTCaAGCAGATTGTTATTCAcTCAAGCCTAnnAACCGGTTtG                                       |                    |                     |                  |          |                                               |

|                                                                                                                                         |                    |   |     |          |                                                |
|-----------------------------------------------------------------------------------------------------------------------------------------|--------------------|---|-----|----------|------------------------------------------------|
| WB235                                                                                                                                   | WB235_Fam_42_94_7  | 7 | 94  | 0.948666 |                                                |
| TCAAAATCTTCTGTTCTCTAAATATTGGGTGCTTTTCGATGCCCTaTGTAAGCAAATCAATGGGAAAATcaTCAATTTCTGaAGGCAGTAATTC                                          |                    |   |     |          |                                                |
| WB235                                                                                                                                   | WB235_Fam_43_19_7  | 7 | 23  | 0.690821 | TGGTTGAGGCTCtgGATTT                            |
| WB235                                                                                                                                   | WB235_Fam_44_226_6 | 6 | 227 | 0.831816 |                                                |
| GTAACCTACGTGAAGCTTCTGTACCTACTGaAATATTGTTaATATTCTgAAAGAgCTTAAATTTACTAcAAGTTTCTGAAAGACATTTcaAAAAAaGTTACTTTGAAGAGATTTATGAATTTTCAAAGTTt     |                    |   |     |          |                                                |
| cgAAAAAtCatCTATTTTGcCTATAAATGGTAGTTTTCATTaATAATAAAATACGCACTAAAAGTAGGCTGAAAATGTACTATTTCT                                                 |                    |   |     |          |                                                |
| WB235                                                                                                                                   | WB235_Fam_45_33_6  | 6 | 33  | 0.649832 | GCTGATTGGTtTcAgAAAAGTGGGCGgaGCTaAtC            |
| WB235                                                                                                                                   | WB235_Fam_46_32_6  | 6 | 32  | 0.838889 | TGTCgAGCGAGAcAGCAGAagAAGAGCTGAGT               |
| WB235                                                                                                                                   | WB235_Fam_47_21_6  | 6 | 25  | 0.624889 | CTGACcAAATTTtGTTcCaGCA                         |
| WB235                                                                                                                                   | WB235_Fam_48_21_6  | 6 | 22  | 0.621212 | TGACaAAATnTnaaTTTGCAC                          |
| WB235                                                                                                                                   | WB235_Fam_49_19_6  | 6 | 21  | 0.706878 | gaAATTATCGATTTTtCga                            |
| WB235                                                                                                                                   | WB235_Fam_50_18_6  | 6 | 19  | 0.644444 | ngGTAGgCAATGAGCAAag                            |
| WB235                                                                                                                                   | WB235_Fam_51_16_6  | 6 | 16  | 0.697917 | TCtaAGGATCTaAGGA                               |
| WB235                                                                                                                                   | WB235_Fam_52_15_6  | 6 | 15  | 0.952593 | GGGGGCAACAAAAAtA                               |
| WB235                                                                                                                                   | WB235_Fam_53_12_6  | 6 | 14  | 0.649206 | TTTTtATTTTtA                                   |
| WB235                                                                                                                                   | WB235_Fam_54_11_6  | 6 | 11  | 0.838384 | aAGTTGTcACg                                    |
| WB235                                                                                                                                   | WB235_Fam_55_48_5  | 5 | 48  | 0.900000 | AATTTtAatTtTGATTTGCCGTAATTTATAtTTTCTGAAGATGAGc |
| WB235                                                                                                                                   | WB235_Fam_56_21_5  | 5 | 25  | 0.616000 | ATAaatatTAATTAaTAaTAAat                        |
| WB235                                                                                                                                   | WB235_Fam_57_25_5  | 5 | 25  | 0.946667 | TATTTACTCTAATGTCTGcCAATt                       |
| WB235                                                                                                                                   | WB235_Fam_58_21_5  | 5 | 23  | 0.667391 | CcATTTTaAGcCAATTTtngA                          |
| WB235                                                                                                                                   | WB235_Fam_59_22_5  | 5 | 22  | 0.630303 | GCACTGACCAantnnAatnTTt                         |
| WB235                                                                                                                                   | WB235_Fam_60_19_5  | 5 | 21  | 0.695238 | AATTTAcCAATTTAcCAaa                            |
| WB235                                                                                                                                   | WB235_Fam_61_20_5  | 5 | 21  | 0.652381 | GTAAATCTACAntggCttcc                           |
| WB235                                                                                                                                   | WB235_Fam_62_17_5  | 5 | 18  | 0.848148 | TcATTCCGTgATTATTT                              |
| WB235                                                                                                                                   | WB235_Fam_63_11_5  | 5 | 14  | 0.697619 | TGCCTgCCTAC                                    |
| WB235                                                                                                                                   | WB235_Fam_64_11_5  | 5 | 11  | 0.951515 | TTTGGAGCGGt                                    |
| WB235                                                                                                                                   | WB235_Fam_65_184_4 | 4 | 189 | 0.862140 |                                                |
| GAATACAGAACCCAaTTATGtCCGAGAAAAAGATCCTAcTCAGAATATaAACATAtTcGAATttatCGGAtGTATAaAGATTCCTCGAAGAcacTTTCCAATTaCCAAAttGTTCAAtTTCTAAAtgAaATTCT  |                    |   |     |          |                                                |
| CTTACTaGAACACTCTTTGGCCAATGTACGCAGCCGAACGTATCATAAGT                                                                                      |                    |   |     |          |                                                |
| WB235                                                                                                                                   | WB235_Fam_66_64_4  | 4 | 67  | 0.721393 |                                                |
| gGTCTGCTAaATCaAAacTTGTAGTTTGTAGtCTAGCAGACCAaATTTcTtCAaACCaCaTtG                                                                         |                    |   |     |          |                                                |
| WB235                                                                                                                                   | WB235_Fam_67_39_4  | 4 | 40  | 0.856944 | TAtTTTTAAttTgaCCTaCTTAAAAAGTAGGTCATGACC        |
| WB235                                                                                                                                   | WB235_Fam_68_36_4  | 4 | 36  | 0.754630 | tTTCGGCAAtTtGacAATTGCCGTTTtggaaAAtt            |
| WB235                                                                                                                                   | WB235_Fam_69_30_4  | 4 | 30  | 0.777778 | TTTCtAGAAAAaTcTGGAAgTTCTAGAAt                  |
| WB235                                                                                                                                   | WB235_Fam_70_30_4  | 4 | 30  | 0.983333 | AATTTTCCAGAAGGTTCTGGAAcATTCCAG                 |
| WB235                                                                                                                                   | WB235_Fam_71_21_4  | 4 | 21  | 0.907407 | AATCCAATATGgacgAAATCT                          |
| WB235                                                                                                                                   | WB235_Fam_72_19_4  | 4 | 20  | 0.761111 | CTCAACCAaAcTcTtAGC                             |
| WB235                                                                                                                                   | WB235_Fam_73_20_4  | 4 | 20  | 0.744444 | gTgAAAaTTtaAATTTtTgA                           |
| WB235                                                                                                                                   | WB235_Fam_74_17_4  | 4 | 18  | 0.902778 | GATGCCCCCTcTGAACG                              |
| WB235                                                                                                                                   | WB235_Fam_75_16_4  | 4 | 16  | 0.847222 | AATTTTTTCcGCaGCaA                              |
| WB235                                                                                                                                   | WB235_Fam_76_14_4  | 4 | 15  | 0.727778 | TTaGGGCcTtgGGC                                 |
| WB235                                                                                                                                   | WB235_Fam_77_15_4  | 4 | 15  | 0.955556 | TTCCCGATCTACGt                                 |
| WB235                                                                                                                                   | WB235_Fam_78_13_4  | 4 | 13  | 0.897436 | GCCTATGGCcTAc                                  |
| WB235                                                                                                                                   | WB235_Fam_79_12_4  | 4 | 12  | 0.840278 | TTTTtCCGAaAt                                   |
| WB235                                                                                                                                   | WB235_Fam_80_12_4  | 4 | 12  | 0.662037 | AgaAgGAGgAaa                                   |
| WB235                                                                                                                                   | WB235_Fam_81_200_3 | 3 | 223 | 0.702043 |                                                |
| gAAAAAGTgAAtTTTCAGtCAAtAcCTTgTggAccaCaATTTATaTGCAAAATTAaTAGATTTTCCAAacTTTgAAAATTAATtTCTGGCTTcAAAcTAActTTTTTaaAAATtCCCGTAGCCATTTGTaGCAAA |                    |   |     |          |                                                |
| TTTTatGtTCTtTCAGAATTTaAAAAcGcATTtCAAAAAaTTTnaaAaCcgcCAAGTTCAAGCA                                                                        |                    |   |     |          |                                                |

|                                                                                                                                           |                     |   |     |          |                                              |
|-------------------------------------------------------------------------------------------------------------------------------------------|---------------------|---|-----|----------|----------------------------------------------|
| WB235                                                                                                                                     | WB235_Fam_82_167_3  | 3 | 172 | 0.656977 |                                              |
| nTATAATGcTCGTAATTATTTtATAAGTgTGTGTTGTCTCAGAgcCAngTCTgAAAAaACAGATTTTTTtTcGAAAAATTTtAAaAacttcGtAaAAATTCgATTTTTtGACanaTctATgnTcTCnTTTTTtTnta |                     |   |     |          |                                              |
| AcATgTAtTTCAGTGAcAtAnaganTcAaAAA                                                                                                          |                     |   |     |          |                                              |
| WB235                                                                                                                                     | WB235_Fam_83_90_3   | 3 | 95  | 0.673684 |                                              |
| ccccGAACGTGTGCGCCGctTCCAAAtAACcACCTccTngCACTaCgTTGCGCACACAcnaanctaCTcgTTTCACGcCAAgtTgCGGAA                                                |                     |   |     |          |                                              |
| WB235                                                                                                                                     | WB235_Fam_84_79_3   | 3 | 79  | 0.912799 |                                              |
| gTGAATCTCctCTCtaCCTAATGAgTCCTGACAGAATACCGGCAGTATTcTGGGGTCTCATTAGGTTTTaGTTTCTTcT                                                           |                     |   |     |          |                                              |
| WB235                                                                                                                                     | WB235_Fam_85_76_3   | 3 | 76  | 0.906433 |                                              |
| AATGCTAGAgGACAcTCCTTTGCACGAAaGgAAGTGGGAGAGACTGTGGaGTTGTGCGGTGTCTtTGTgCATGCTCg                                                             |                     |   |     |          |                                              |
| WB235                                                                                                                                     | WB235_Fam_86_66_3   | 3 | 68  | 0.892157 |                                              |
| AATCAACCTATTcAGTTGACAATGGTTTTCTTTTAtCAAAtTTtTTAaAATTTtAAAGAAAAACACA                                                                       |                     |   |     |          |                                              |
| WB235                                                                                                                                     | WB235_Fam_87_64_3   | 3 | 64  | 0.954861 |                                              |
| TTTTTGACTActGAATGTCTTTTTCGCTACTGACTGaAAAAATAGCTACATTTCGCACTTTTTGtC                                                                        |                     |   |     |          |                                              |
| WB235                                                                                                                                     | WB235_Fam_88_34_3   | 3 | 34  | 0.980392 | ATGCACCATGTCAAAAAATATATCCAAAAGTACG           |
| WB235                                                                                                                                     | WB235_Fam_89_32_3   | 3 | 32  | 0.972222 | CGACCTGCGACCTAGCGACCTaGGTCGCTTTG             |
| WB235                                                                                                                                     | WB235_Fam_90_27_3   | 3 | 27  | 0.658436 | aGCaGCCGACACCTtaCnGGTtgcttA                  |
| WB235                                                                                                                                     | WB235_Fam_91_26_3   | 3 | 26  | 0.965812 | TCAGGGCGAAACGGGAGGTGAATCGC                   |
| WB235                                                                                                                                     | WB235_Fam_92_21_3   | 3 | 23  | 0.801932 | CTAgAAAACTCGGCCAtCAA                         |
| WB235                                                                                                                                     | WB235_Fam_93_21_3   | 3 | 23  | 0.608696 | gCCtAAAAAcgtaAATTTTAA                        |
| WB235                                                                                                                                     | WB235_Fam_94_21_3   | 3 | 23  | 0.748792 | TAGTTTtaTAGTTTGtaGTTTG                       |
| WB235                                                                                                                                     | WB235_Fam_95_20_3   | 3 | 22  | 0.656566 | GTCGATTACGgGAgTTcnT                          |
| WB235                                                                                                                                     | WB235_Fam_96_22_3   | 3 | 22  | 0.777778 | AcTACAGTAccCcTACAGTACc                       |
| WB235                                                                                                                                     | WB235_Fam_97_19_3   | 3 | 21  | 0.608466 | GCCTAGaAATCtnAtgATG                          |
| WB235                                                                                                                                     | WB235_Fam_98_18_3   | 3 | 21  | 0.761905 | TTTTGTcAGTGCTATAgT                           |
| WB235                                                                                                                                     | WB235_Fam_99_21_3   | 3 | 21  | 0.767196 | ACTACcGTACCaaCtACcACa                        |
| WB235                                                                                                                                     | WB235_Fam_100_21_3  | 3 | 21  | 0.957672 | CTAACATTTTTCAaTTTTTCGT                       |
| WB235                                                                                                                                     | WB235_Fam_101_21_3  | 3 | 21  | 0.682540 | GTgcaaatgnAtmnttGgTca                        |
| WB235                                                                                                                                     | WB235_Fam_102_20_3  | 3 | 20  | 0.688889 | GTAAATCtACAtAgaaCntC                         |
| WB235                                                                                                                                     | WB235_Fam_103_20_3  | 3 | 20  | 0.777778 | CGAtAtAGCTATtaACGAtA                         |
| WB235                                                                                                                                     | WB235_Fam_104_16_3  | 3 | 16  | 0.777778 | TTcCAGGgTTcCAGGg                             |
| WB235                                                                                                                                     | WB235_Fam_105_11_3  | 3 | 12  | 0.787037 | ATTTGgAATAT                                  |
| WB235                                                                                                                                     | WB235_Fam_106_11_3  | 3 | 12  | 0.722222 | ncCACTGACCA                                  |
| WB235                                                                                                                                     | WB235_Fam_107_10_3  | 3 | 10  | 0.733333 | TCcATCcCGA                                   |
| WB235                                                                                                                                     | WB235_Fam_108_177_2 | 2 | 177 | 1.000000 |                                              |
| GAGTCTCACGATGTGTCAACGTGTCTCAGTCGGCTTGATCTACGTAGATCTACAAAAATGCGGGAGAAGAGACGCAGACTTATTCTCTGATTTTGCATGAGTAAGAGCGTGCTGGCGTCACATTTTTGTGCGGCA   |                     |   |     |          |                                              |
| AAAAATTCCCGCATTTTTTGTAGATCAAACCGTAATGGGACG                                                                                                |                     |   |     |          |                                              |
| WB235                                                                                                                                     | WB235_Fam_109_151_2 | 2 | 151 | 0.924945 |                                              |
| TTTAAAGGCGCATAGGTAGtTCAAANTTCAAANTTGACGGATTCTAGTCAATATGGGGCTTATTTTAAAGCTCTCAGTAAGCTNAANTNTANTTNAGCTACTaAaAATGAANATTTTNAATTTTTTGGGTCTCG    |                     |   |     |          |                                              |
| CAGCGAAAAATTCGAA                                                                                                                          |                     |   |     |          |                                              |
| WB235                                                                                                                                     | WB235_Fam_110_119_2 | 2 | 119 | 0.619048 |                                              |
| GCcacCcTTAAcCCTAAcCCAAaGCAGAGCAGGATGTAGGCCTGaaAcGcGGTaGcgAcaCaaTCAaGCCcAAcAacCaGGgaTGAGGGCCGACGGCCGgaaaACTCTTaGAAACTgTaG                  |                     |   |     |          |                                              |
| WB235                                                                                                                                     | WB235_Fam_111_110_2 | 2 | 110 | 0.745455 |                                              |
| TTTCACaTTTTTCaCgTGATTATaTAGGTCACGAaCcAAaTTATTTTGAATAATTGAcCTacacGGacCTaTAACTTTGGAGaTATGGGaAATcaAGTATGaGCTTTCAGAT                          |                     |   |     |          |                                              |
| WB235                                                                                                                                     | WB235_Fam_112_86_2  | 2 | 86  | 0.689922 |                                              |
| TGTATTTTGAAGGTCaTcgCAATAgGGAAGATGGAAGAcTaCgaAGtTAAGgAgAAgCTATTGacAGACCCCGAAATACTGGC                                                       |                     |   |     |          |                                              |
| WB235                                                                                                                                     | WB235_Fam_113_73_2  | 2 | 73  | 0.945205 |                                              |
| AATAAAATATTGGAAATCCcTATGACACACTTAAGCCTAAAGGCCGAAAAaAaACTAGGATGCCCAACTGG                                                                   |                     |   |     |          |                                              |
| WB235                                                                                                                                     | WB235_Fam_114_44_2  | 2 | 44  | 0.681818 | cCAGCCGACAGCCGAAAAaTTcacGaATTTTCGGCTGGTaGCac |
| WB235                                                                                                                                     | WB235_Fam_115_44_2  | 2 | 44  | 0.704545 | aCGGCAAAATCGGCAAAtnCTgcTTTTTtCaaATTTGCCGAGC  |
| WB235                                                                                                                                     | WB235_Fam_116_44_2  | 2 | 44  | 0.969697 | CTGTTTTCTGAGCATTgTAGATTTTCGGATTGATGGCCGAAAGG |

|                                                                                                                                          |                     |   |     |          |                                            |
|------------------------------------------------------------------------------------------------------------------------------------------|---------------------|---|-----|----------|--------------------------------------------|
| WB235                                                                                                                                    | WB235_Fam_117_41_2  | 2 | 41  | 0.711382 | ccGTTTCGCGcTTGAGCGATTcCttACCCTTAAATGGGcCc  |
| WB235                                                                                                                                    | WB235_Fam_118_41_2  | 2 | 41  | 1.000000 | AAAACGGGAAAACGGGAATTCCCGTTCCCGTGAAAAATTTTA |
| WB235                                                                                                                                    | WB235_Fam_119_40_2  | 2 | 40  | 0.975000 | AAAATCCACGTAGATTATTGATTTTTTCATgGAATTTTGCA  |
| WB235                                                                                                                                    | WB235_Fam_120_39_2  | 2 | 39  | 0.897436 | TTATGaAAAAAGTGGCTCTAGaGCCACaAGAAATACCAGT   |
| WB235                                                                                                                                    | WB235_Fam_121_36_2  | 2 | 36  | 0.601852 | cGGCAaAtTaCCaTaAATTTTtAAAAcCGGCAaAAAc      |
| WB235                                                                                                                                    | WB235_Fam_122_34_2  | 2 | 34  | 0.612745 | cCaCCCGGcAGGTGTGCGGTGCTaaaaCTAtAaC         |
| WB235                                                                                                                                    | WB235_Fam_123_32_2  | 2 | 32  | 0.671875 | tTTTTTGAGCcaAAAAATTCtaAAAAATgCTCa          |
| WB235                                                                                                                                    | WB235_Fam_124_32_2  | 2 | 32  | 1.000000 | GCACCAATAGCACCAATTTAGCACCGATGGA            |
| WB235                                                                                                                                    | WB235_Fam_125_31_2  | 2 | 31  | 0.752688 | GGTTACTGTAAaTCaATcaTAGGATACTTtG            |
| WB235                                                                                                                                    | WB235_Fam_126_31_2  | 2 | 31  | 0.784946 | CTGAAATTacaAaTTTCCAAaTGTAaaaaATGT          |
| WB235                                                                                                                                    | WB235_Fam_127_31_2  | 2 | 31  | 0.956989 | TCGACAGAAGCTGTGCGAaATCACACTTTCC            |
| WB235                                                                                                                                    | WB235_Fam_128_29_2  | 2 | 29  | 1.000000 | AAGGATTTCCTACTATGTCAATACATTGT              |
| WB235                                                                                                                                    | WB235_Fam_129_27_2  | 2 | 27  | 0.901235 | GCTGCTGGAGGATCaACTGCATCAACc                |
| WB235                                                                                                                                    | WB235_Fam_130_26_2  | 2 | 26  | 1.000000 | CAAAACCGGCAATTGCCGAAAAATTC                 |
| WB235                                                                                                                                    | WB235_Fam_131_24_2  | 2 | 24  | 0.722222 | gGCATCTGccGCcGGAGCTGGaGC                   |
| WB235                                                                                                                                    | WB235_Fam_132_24_2  | 2 | 24  | 0.680556 | GCcTAGaCTcaGGCTTAGGCTtAa                   |
| WB235                                                                                                                                    | WB235_Fam_133_23_2  | 2 | 23  | 0.630435 | aATTTCTAGGCCACcAcgTTcAg                    |
| WB235                                                                                                                                    | WB235_Fam_134_23_2  | 2 | 23  | 0.673913 | tCTAATTAGATnCaCCTcTTTT                     |
| WB235                                                                                                                                    | WB235_Fam_135_23_2  | 2 | 23  | 0.659420 | ATTaaATTTTTTCaCaaAAAAAa                    |
| WB235                                                                                                                                    | WB235_Fam_136_22_2  | 2 | 22  | 0.643939 | aATAAAAAATgTCaCAAAAAAtAg                   |
| WB235                                                                                                                                    | WB235_Fam_137_22_2  | 2 | 22  | 0.681818 | GTAAATCTACaCaaATagCCCC                     |
| WB235                                                                                                                                    | WB235_Fam_138_22_2  | 2 | 22  | 0.621212 | TTcaAGCcaTTTTCaGACcAAAT                    |
| WB235                                                                                                                                    | WB235_Fam_139_22_2  | 2 | 22  | 1.000000 | TCGAGAAAAAATCTGAAAAAAT                     |
| WB235                                                                                                                                    | WB235_Fam_140_22_2  | 2 | 22  | 0.954545 | ATTCTGCGCACCCCCCTGCGCaG                    |
| WB235                                                                                                                                    | WB235_Fam_141_20_2  | 2 | 20  | 0.933333 | CCACCAAAAAGTTTTCTAGG                       |
| WB235                                                                                                                                    | WB235_Fam_142_20_2  | 2 | 20  | 0.950000 | GGACTAGTTTTcGAGTAGAG                       |
| WB235                                                                                                                                    | WB235_Fam_143_20_2  | 2 | 20  | 0.866667 | CCCCGAaGCTCGAGCTCAaA                       |
| WB235                                                                                                                                    | WB235_Fam_144_20_2  | 2 | 20  | 0.800000 | CCACCCTGTAAaATcATGGA                       |
| WB235                                                                                                                                    | WB235_Fam_145_19_2  | 2 | 19  | 0.684211 | CTAGGTGCCTAcTccATgC                        |
| WB235                                                                                                                                    | WB235_Fam_146_19_2  | 2 | 19  | 0.929825 | CGCCAAGgATCGAGAAAAAG                       |
| WB235                                                                                                                                    | WB235_Fam_147_17_2  | 2 | 17  | 0.656863 | gCaGaTTGCCGGAATTG                          |
| WB235                                                                                                                                    | WB235_Fam_148_17_2  | 2 | 17  | 0.803922 | GCACTGAcCAAcTTTTT                          |
| WB235                                                                                                                                    | WB235_Fam_149_16_2  | 2 | 16  | 0.750000 | GTaCTGGGGTaCTGGG                           |
| WB235                                                                                                                                    | WB235_Fam_150_15_2  | 2 | 15  | 0.622222 | CGATgCTCCACCaga                            |
| WB235                                                                                                                                    | WB235_Fam_151_14_2  | 2 | 14  | 0.761905 | TaTACAAAAAnGTA                             |
| WB235                                                                                                                                    | WB235_Fam_152_14_2  | 2 | 14  | 0.666667 | cCTCAAGCgTAGGa                             |
| WB235                                                                                                                                    | WB235_Fam_153_14_2  | 2 | 14  | 0.619048 | gATAATTgAaAATc                             |
| WB235                                                                                                                                    | WB235_Fam_154_11_2  | 2 | 11  | 0.878788 | AAACTTGGGCa                                |
| WB235                                                                                                                                    | WB235_Fam_155_11_2  | 2 | 11  | 0.636364 | cGGAAaATTaA                                |
| WB235                                                                                                                                    | WB235_Fam_156_11_2  | 2 | 11  | 0.636364 | cATAaCTGAGa                                |
| WB235                                                                                                                                    | WB235_Fam_157_255_1 | 1 | 255 | 0.000000 |                                            |
| AACAAgTCGGGAACGTTTCGGAAGCTCTGAGGAAACTCCGACAATATCATGCTTAAGTACGCAATTGAGCTATCTTTATTAGATTTCGAAAAAGGACTCTTCAAAAAATTGAAGCAATAACGAAGAAGCTTAAGTT |                     |   |     |          |                                            |
| GGAActGGCGAAGCTTAAATTGGGANttATGCAGTCTTTATCAGATTCAAAAGACGATTCTTCGACCAATGAAGCAAGTCCGGAGNACGATCTACCTTCGACTTCTGATGGCAGAACTCC                 |                     |   |     |          |                                            |
| WB235                                                                                                                                    | WB235_Fam_158_230_1 | 1 | 230 | 0.000000 |                                            |
| GCTGAATTcAGTTGGGTANGATGTGACTTCATGGCTGAGTGGAATATCTTGAAGTTATCAGCACGATGTGTAGAGTCGAGTGGTCCATCGTATTGTTcAGAAATTGGATAATCAAGATGAGATGGAGATTTCTTG  |                     |   |     |          |                                            |
| AACAAATCCAGTGATCTTCGATTTCaATGATGGCTCGTCCTTCTTCTGTCTCTTCAATCACAaCTGGGATGACATGCTCTGGCAGCTTCTCATA                                           |                     |   |     |          |                                            |
| WB235                                                                                                                                    | WB235_Fam_159_228_1 | 1 | 228 | 0.000000 |                                            |
| CCACCAGATCAGCAACGTCTCATCTTCGCCGGAAGCAACTCGAGGACGGCCGCACCCCTTTCGGACTACAaCATCCAGAAGGAATCAACTCTTCATTGTTCTCCGTCTGAGAGGAGGTATGCAGATCTTCGTC    |                     |   |     |          |                                            |
| AAGACATTGACCGAAAGACCATCACCTCGAAGTCGAAGCCTCCGACACCATCGAAAATGTCAAGCCAAGATCCAAGACAAGGAAGGAATC                                               |                     |   |     |          |                                            |

|                                                                                                                                              |                     |   |     |          |
|----------------------------------------------------------------------------------------------------------------------------------------------|---------------------|---|-----|----------|
| WB235                                                                                                                                        | WB235_Fam_160_189_1 | 1 | 189 | 0.000000 |
| TTTTTTTTGACTATGGAATTATAAAGAAAAATCGAATTTCAAAAAAGCATGTATTAGCCAATGTAAACGCGCTCCAATGATGATGTAGCCACGTTGGTATCAGAGTGTCTCTTTACGGCTTGATTTAAATACGTAG     |                     |   |     |          |
| ATCTACAAATTCACCTTATCTGTTTTCTCACGGGTTTAGGATATTTTTTCTGTTA                                                                                      |                     |   |     |          |
| WB235                                                                                                                                        | WB235_Fam_161_184_1 | 1 | 184 | 0.000000 |
| GTTCAAAGATACAAAATTTATCTACACATCTACAAGTTAAACTTGCAACTTAGTTAACCAAATTCAAAAGTTATGAGCCGGGGAACATAATAACCAACGTTTCACACTAAAAAGCCCAAAAAAATTCGAAAA         |                     |   |     |          |
| TCATTTTTATCTCATGACGCGGACAAGCTACAAATGTCTAGTTAGGCTT                                                                                            |                     |   |     |          |
| WB235                                                                                                                                        | WB235_Fam_162_183_1 | 1 | 183 | 0.000000 |
| TTTTCTGCGTCTCGCCTCGCCTCACACTATTTTNCACACCAAACTTTGAGNCTATGTATCTCTGTAACGGGTTGCGCTTCTGAAAAATTCCAAAGTACGGGATATATAAAATTTNGAATTCCTTCTCACCGTT        |                     |   |     |          |
| AAAAAACTAAACACCTAGGCAAGACGAGACGAGACGAGANACCCCAAT                                                                                             |                     |   |     |          |
| WB235                                                                                                                                        | WB235_Fam_163_181_1 | 1 | 181 | 0.000000 |
| TTTTTAACTTTTAAATCCACTAAAACTCGGAATGGTACAGAACATGCAAATTTGTAATTTCAAGAACTGAATGTGGTTTCGAATATTTATGGATTGCTTTATTCTAAACTGACTCTGAAATATTTTGCATCCATT      |                     |   |     |          |
| TGACTACTAATTGTCATATTATACCGAACACTACTAATTTAGTGG                                                                                                |                     |   |     |          |
| WB235                                                                                                                                        | WB235_Fam_164_180_1 | 1 | 180 | 0.000000 |
| TGTCGGCCGCTGTATCTTTTGCCCTCAATTTTTTTTNAATTTTNAACATNCATATTCAGTAGATAACATTATGAGCTACAGTTTGTTAGTTAAAAATTTATTTCTAAAATTACTAGTTTCTGAGTTATACTCAT       |                     |   |     |          |
| TCCAACCCACCCCAAGAGAAATTTCTTAAAAATGAACTCGCGAGG                                                                                                |                     |   |     |          |
| WB235                                                                                                                                        | WB235_Fam_165_179_1 | 1 | 179 | 0.000000 |
| CTACCCAAATTTTTGAAATTTTGAAATTTTTTCAAAAATTTCTCAAATTTTCAAAATCCCATAAATTCAGCCAAATTTTTGAGATTTTCAGATATTTTTTAATTGAAAATTTCTGTTTGTCTTATCCATTAACTATATC  |                     |   |     |          |
| GCTGCATCTACATTTTTTACAGTACCCCATGACTTTTCCCGATT                                                                                                 |                     |   |     |          |
| WB235                                                                                                                                        | WB235_Fam_166_177_1 | 1 | 177 | 0.000000 |
| CTAACAAAATAATCAGCGTAAAATTTCTACATTTTACTAGTTAAACAATATTTTGATAACATCAGTGGTTTTTGAGATACGCAAGTTTTTAAGGTGGACGCCCCAAAAATAGTTGTGAGCAGCTTTAATCAAAAACC    |                     |   |     |          |
| GACATAACTTTTTACTCACTAACGGTATCAAAAATGTTTTTAA                                                                                                  |                     |   |     |          |
| WB235                                                                                                                                        | WB235_Fam_167_175_1 | 1 | 175 | 0.000000 |
| GATGCACCATGTCTTTGACAGTCAATATCTCGGTTTATTTGTAGCTATCAAAAAATTTTCAACTACAAATCTATAGAAAAATTAATAGTTCAACATTTTCTCAGTTGACAGTTTTTTGATAACTGCAATGACATC      |                     |   |     |          |
| CGAGATATGAGCTTTCAAAGTTGAGAGACCTCACTCGGTT                                                                                                     |                     |   |     |          |
| WB235                                                                                                                                        | WB235_Fam_168_175_1 | 1 | 175 | 0.000000 |
| AACTTGTGACGGTGGGTATGGATTTTATGCACATAATTTGTTTCGAAATAGTCTACCNAGTAACTGGTGAAGTTTCAAAAATTTTGTGGATCTAGTTTTTGAAAAAGTTCAAAATTTGTGCCAATTTTGACCAAT      |                     |   |     |          |
| TTTTGGTGGTTTTCTGAGCTAAAATTTGAAAAGTTGGGAATG                                                                                                   |                     |   |     |          |
| WB235                                                                                                                                        | WB235_Fam_169_175_1 | 1 | 175 | 0.000000 |
| AAATTTTGGGTTCACTCTTTTACTAGACAGTGATTGTTGCATTGTAGGATTCGGTGGACTTGTCCAACAACCTTACTTTGGCATGAGTTTAATAAAAAGGTTTTTACCATGAACTGAATCAATTCAAAATAAAAC      |                     |   |     |          |
| CTCGAGAAATGAAAACATCCTCAGTAATTTCAATCCTGTTT                                                                                                    |                     |   |     |          |
| WB235                                                                                                                                        | WB235_Fam_170_174_1 | 1 | 174 | 0.000000 |
| CTTCAAGAGCTCAGTGTTATTTATGACATGCCAACCTCGACAATTGACCTGAACATGCTCCAAGGAATCGAAGACAACCTTGAACAGCCTTCCAGCTGAAGAATCTGATAAGATCCGAGAGAAGATTAACGATCTG     |                     |   |     |          |
| AGAAGAAGGAAACAAGAAAGCGATCAAGCTGAAGCTCTT                                                                                                      |                     |   |     |          |
| WB235                                                                                                                                        | WB235_Fam_171_165_1 | 1 | 165 | 0.000000 |
| CTTTTCCAAAATGGCAATTTTTGATGAAAAAATCCGAATTTTCACAAATTTCAAAAAATTTTTAAACTTTATAATTTTAGCTTTGAATATTCCAAATGGAAGTGTGCATAACCTATCAATTTGATATATAAACT       |                     |   |     |          |
| CGTGCTTACCTTCAGGCATTCACTTTTTCAC                                                                                                              |                     |   |     |          |
| WB235                                                                                                                                        | WB235_Fam_172_155_1 | 1 | 155 | 0.000000 |
| TCCCGCTGTGGTTAAAAGTTTTTTGCGTGCTCAGTTCTGTACGGTAAATGTGTTAAAACTTCTGGAACTTGAAATTCGAAGTTATTCAGAAAATTTGTTCAAATGGCGCAGTGGGAAATTCGATTTCTCAGACC       |                     |   |     |          |
| CAAGAGGCCACGGGTTCAAT                                                                                                                         |                     |   |     |          |
| WB235                                                                                                                                        | WB235_Fam_173_153_1 | 1 | 153 | 0.000000 |
| TGAGGTGCAGGGCGTGATGAGCTTTGTTGAACTGGGAACTGTTGATTCCCGGAGCCGTGATTTCATAGATGAGTTGGAGGGACCTGCTGTGGAACCTGTTTCAACTTGAGCAATTCATGAGCCATCAAGAAGCTT      |                     |   |     |          |
| TCCGGCAGATTGGGCAAC                                                                                                                           |                     |   |     |          |
| WB235                                                                                                                                        | WB235_Fam_174_151_1 | 1 | 151 | 0.000000 |
| CATTTTCAGATATTCCATCACCACCAACACCTTCATCCACTTCTTGCCTGGAACGACGGGATTTTCTACAAAAATCGGATTTTTTCTCTATGTAGTTTAATTGATGTATAATTCGAAAAGTCAGTCTTTCCTA        |                     |   |     |          |
| GGTTTTTAAATTGAAA                                                                                                                             |                     |   |     |          |
| WB235                                                                                                                                        | WB235_Fam_175_150_1 | 1 | 150 | 0.000000 |
| TTGCAACATGCGGTGCGGCGGAAAAATTCGAATTTTTTCACTCCAAAACAGGTTTTTTCGACCAATTTTTTCATATTTTCAAGCGAAATATGATAGAAAAATTCAAATTTTCACTAAAAATCGCCAATTTTCCACATTTT |                     |   |     |          |
| CTCATTGGAGCGCAC                                                                                                                              |                     |   |     |          |

|                                                                                                                                            |                     |   |     |          |
|--------------------------------------------------------------------------------------------------------------------------------------------|---------------------|---|-----|----------|
| WB235                                                                                                                                      | WB235_Fam_176_150_1 | 1 | 150 | 0.000000 |
| TTGAGGGCCGCGAGTCCCGAATACACGAAGAAGTGTGGAGATCCGTCAAGCCTATTCTAAGCATAATAATTAGTTTCGAGTGTGCGAAGCCCAAATAGACGCGAGAAGCGTTGGACAACTTTTAGGCCTATTCTGA   |                     |   |     |          |
| GCCCAATAATTCATG                                                                                                                            |                     |   |     |          |
| WB235                                                                                                                                      | WB235_Fam_177_146_1 | 1 | 146 | 0.000000 |
| TGGCCTAGAAATCNCAAGTTTGCAAAAGTTAGGCCACCAACTTCAAATGCCTATAACTCAGCGGAAAAATCAATATTTTCCATTGATTTTAACTGCTAAGATGTAGCCAATTACGTAGCGCAACTTTTGGCCTAC    |                     |   |     |          |
| TTAACAATTGG                                                                                                                                |                     |   |     |          |
| WB235                                                                                                                                      | WB235_Fam_178_144_1 | 1 | 144 | 0.000000 |
| TTCTAGGCCACCAATTGGAAATCATCATAACTTGGCTTAAAAATCCAGATTTTTGGAGTCTGGTAACTGCAACATGTTGCCCTGTAGTTTTTCTACAAGTTAGGATATATTAATTTTTTGGTGGCCTAAAAAGTCCAA |                     |   |     |          |
| ATTATGGAT                                                                                                                                  |                     |   |     |          |
| WB235                                                                                                                                      | WB235_Fam_179_143_1 | 1 | 143 | 0.000000 |
| CAGTGGGATTTTCAATGTCTTCCAATCAAACGTCCGGGGTTCGAGTCCGCACAGGGGTATTTATTTTTTGCAGCTGTGATTAACAAGTTTATAGCTGCAAAAGTCATTTTAATCGAACTTTTCAGGAAAAATGTCC   |                     |   |     |          |
| GAATGGCG                                                                                                                                   |                     |   |     |          |
| WB235                                                                                                                                      | WB235_Fam_180_122_1 | 1 | 122 | 0.000000 |
| GATCTACAAAAATGCGGGAAAAGTGACACAGAGTTCTCAACTGATTTTGCATAAAAAATCCCGCATTTTTTGGAGATCAAACCGTGATGGGACAGCCTGGCACCCTTGCTTGATCTACGTA                  |                     |   |     |          |
| WB235                                                                                                                                      | WB235_Fam_181_121_1 | 1 | 121 | 0.000000 |
| AAAAGATAGTTGCCCTAAGAGCAGAAGGTTGCAAACCGCAAGAGCAAACCTTGCCAAATGACAAGCCACCCCAAGTACTCGTTGCACCTACCTATCATAAGCTCGTAGACTATAATTTCTCTG                |                     |   |     |          |
| WB235                                                                                                                                      | WB235_Fam_182_117_1 | 1 | 117 | 0.000000 |
| TGTGGTTCGACAGTAGGTGCACTAGTCTCTGGCACTGGAACATCCTTTTGCTCAACAATTTTCAGCTGGTTGTACTTTCAGATGTTTCTTTTGATTCCACAGGTGCAAGTTTCTCAAC                     |                     |   |     |          |
| WB235                                                                                                                                      | WB235_Fam_183_114_1 | 1 | 114 | 0.000000 |
| GTGTTTCAGAATTACATGGAGTCTCACTACTTGCAGAATTTGTGGCTGTAGACGATGGGCCTGCTGTAGTTGAATCGTTTGGAACTGTATAGTGGATGTTCCATCAGACGTTT                          |                     |   |     |          |
| WB235                                                                                                                                      | WB235_Fam_184_108_1 | 1 | 108 | 0.000000 |
| ATCCTCAACACCATCNGCGTCATCTAGTTCCTCCGGAACATATGTCGACAATTTCAGGATCAACTGGTTCNACAGTTACAGTTGTACCAGGATCNTCTAGCACATTTGG                              |                     |   |     |          |
| WB235                                                                                                                                      | WB235_Fam_185_108_1 | 1 | 108 | 0.000000 |
| TGGGTAATCAGGTACGGGCTTTTCAAGTTTTTCAAGTTTTTCCAGTGAATATCTAGGTACAGAGCCAATTTTCAGCCAGGAGTGGGACTAGAGATATGAAACTCTTGGGTTA                           |                     |   |     |          |
| WB235                                                                                                                                      | WB235_Fam_186_108_1 | 1 | 108 | 0.000000 |
| AAGTCTTCTTGATTCTGAGTTCTTGCTTCGAACTGTTGACCATCTCCTTGCCAGGATCTTATTTGCAGATGGAACCTTCTTGGCATAACCGTTCTCCACTGATGTGAGTG                             |                     |   |     |          |
| WB235                                                                                                                                      | WB235_Fam_187_104_1 | 1 | 104 | 0.000000 |
| CCTGCGAAAGCGAATCTCTGGCCTGGCGGAGGGCCAACTAACTCTCTCCCTCAAGCCTTCGGGTGCTTCTTGGGTTATCGGTGAATTTTTTGGGTCTGTCAAGGT                                  |                     |   |     |          |
| WB235                                                                                                                                      | WB235_Fam_188_102_1 | 1 | 102 | 0.000000 |
| TTGCTGCAGCATATCTTTCTCCAGTACCACCTTGATATGTGCAACGATTGATAGTTTGAAGAATCAAGAGAATCTGTTGGACGATCAATTCATCTTTGGGTC                                     |                     |   |     |          |
| WB235                                                                                                                                      | WB235_Fam_189_102_1 | 1 | 102 | 0.000000 |
| TGTACACTTCTCCCAAAATGACTGTAAGAATGGACTCCTTATATGATTTTAAACCCGACTCTGGACATACAAACTTCTCTCAAAAAGAAAAATAGACTTCACA                                    |                     |   |     |          |
| WB235                                                                                                                                      | WB235_Fam_190_101_1 | 1 | 101 | 0.000000 |
| GCATTTGCATATNGAGATCAGATAAAAGTTAGAATTTTCCAGCCGTTGCAAGTGCCTCTATTGAGAACATTTTGAAAAATTGAATGTTTTCACATTAGAGC                                      |                     |   |     |          |
| WB235                                                                                                                                      | WB235_Fam_191_101_1 | 1 | 101 | 0.000000 |
| GGTTACTGTAGCTCCAGAAATACGCAAACACCGACTACGGTTCCCTAATACATCAGATATTACGACAAAGTGCAGAAAAATCGCTAAAAATGACTTTACTGG                                     |                     |   |     |          |
| WB235                                                                                                                                      | WB235_Fam_192_101_1 | 1 | 101 | 0.000000 |
| TTGATTTTTTCGTCTTATGAAGGAATATTGGTTTCGGGGTAGTGGGCGGATATGGTCGGGGTACTGTAGGTATACGGTAGGGTTACTGTAGTTTTTGAAATT                                     |                     |   |     |          |
| WB235                                                                                                                                      | WB235_Fam_193_96_1  | 1 | 96  | 0.000000 |
| GGTTGATTTGCGGCACTCTACAGATAGTGGATCTGCTTCTTACCAATCTTCCCGTTACCGCCACGCACTTAAGCTCCAAACTATTTTATTTTTTTG                                           |                     |   |     |          |
| WB235                                                                                                                                      | WB235_Fam_194_96_1  | 1 | 96  | 0.000000 |
| CTTCTGGTAATGTTCCCATAAATGGGTAAATACCACTATAAGTAACCTAGTGGGACTGAAAAGATATAAATGAGCTTATTCTAAGGGTGAAG                                               |                     |   |     |          |
| WB235                                                                                                                                      | WB235_Fam_195_93_1  | 1 | 93  | 0.000000 |
| TGCTTCTCGTCGTCCACCACCACCACGAAGGGAAGTGAACCCACCACCACCACCAACTGGAGAACCAAGGATCTTTCTGGAGAAGGTAA                                                  |                     |   |     |          |
| WB235                                                                                                                                      | WB235_Fam_196_93_1  | 1 | 93  | 0.000000 |
| CAGTACCCCTCAAGGATCATCTGTCTCCACGGTATCCCGGTAACTACAATGCCTTTGCCAGCACTTCCGATGCTCCACAGTATCCAGGATCCTCC                                            |                     |   |     |          |
| WB235                                                                                                                                      | WB235_Fam_197_87_1  | 1 | 87  | 0.000000 |
| TGAAGTCGTAGGATTTCTGTGTGGTGACTGGTGTGTTGTANTCTGTGAAGGGGACGTGGCTTCTTCCGTTGTGTATGCTTCTNNNG                                                     |                     |   |     |          |
| WB235                                                                                                                                      | WB235_Fam_198_81_1  | 1 | 81  | 0.000000 |
| TGTCGGCCGCTACCAAACCTATTAGCANACACCAAGCACTACGTTGCGCACACACCAAACTGCGGAACCCCGAACAG                                                              |                     |   |     |          |

|                                                                                 |                    |   |    |          |
|---------------------------------------------------------------------------------|--------------------|---|----|----------|
| WB235                                                                           | WB235_Fam_199_80_1 | 1 | 80 | 0.000000 |
| AATTTCTCAATAGGGCGCGCTTGCAACATCTGAACGGCGCGAAATTTGAATTTTGGCCATAAAATAACGAAAACTAACT |                    |   |    |          |
| WB235                                                                           | WB235_Fam_200_78_1 | 1 | 78 | 0.000000 |
| CGAAGTTGTGGACCAAGATCACAAACAGGCGGATTGGCGGCATAACCGGAGCAACAGTAGTGTCAATTTGGTTCTTC   |                    |   |    |          |
| WB235                                                                           | WB235_Fam_201_78_1 | 1 | 78 | 0.000000 |
| TGCAAGGCTCCGATGATGATACCACTTCTAAAGTCGAGGTGTCACAATTTTCGGGTGTCGTAGAACTTGAATCAGTAC  |                    |   |    |          |
| WB235                                                                           | WB235_Fam_202_78_1 | 1 | 78 | 0.000000 |
| GAGCTTTGGGGCTTTTGGCTTGATCTCAGTCGACTTGATGGATTCTGGCTTGGGTTCTGCAGGCTTTTCGGGCTCCTT  |                    |   |    |          |
| WB235                                                                           | WB235_Fam_203_77_1 | 1 | 77 | 0.000000 |
| GGAAGCTTCATCTTTTGAATTATAAAAAATAAATTTTCATTTCAAAATCAGTGTGTGCACTATCAAAAGTGTCCACT   |                    |   |    |          |
| WB235                                                                           | WB235_Fam_204_73_1 | 1 | 73 | 0.000000 |
| ANTTTGTAGTTTGTAGTCTAGCAGACCAAATTTATTA AAAACTGCAGAAAATTGATGGGTCTGCTAATTAAG       |                    |   |    |          |
| WB235                                                                           | WB235_Fam_205_72_1 | 1 | 72 | 0.000000 |
| TCCATCCAGCTGTGGTTGGTCTCTGGGTGAATCCTCGAGAAGTATCACTAGTAGTACCATTGGCTCCGTTCG        |                    |   |    |          |
| WB235                                                                           | WB235_Fam_206_72_1 | 1 | 72 | 0.000000 |
| ATGAATTTTAATACAATTTTCTGACGATGAAGTCATAAAAAATTCATTTTTTGACCTTTCAACTTTAGTTTT        |                    |   |    |          |
| WB235                                                                           | WB235_Fam_207_72_1 | 1 | 72 | 0.000000 |
| TGGTTGTGTTCCCAAAAGTGAGAAAAGAGGTACAGACCTCTGTACGAATATGTCTTATCAGCTTCAAAAGA         |                    |   |    |          |
| WB235                                                                           | WB235_Fam_208_71_1 | 1 | 71 | 0.000000 |
| ATTTATGTGAAAATTCAGGTTTTTAGGGCATTTTTTGAGGGAATCTGAATTTTTCCGATTTTTCTGACGA          |                    |   |    |          |
| WB235                                                                           | WB235_Fam_209_70_1 | 1 | 70 | 0.000000 |
| AAAAATCGATTTTTTGAAGTTTTTCTCAATAGAGCGCATTTTCAACAGCGAAAAAATTGAATTTTCCGCC          |                    |   |    |          |
| WB235                                                                           | WB235_Fam_210_69_1 | 1 | 69 | 0.000000 |
| AGGTAGGCCTGTAGGCATTGACTGNCAGAAAAGCGTAGACAGGCAAGCAGGTAAAAAGATACATGAGGC           |                    |   |    |          |
| WB235                                                                           | WB235_Fam_211_68_1 | 1 | 68 | 0.000000 |
| TTGGTTGAGGCTAGAAAATGTTGTAGTTTGTAGTGTGTTAGCCTCAACCAAATTAATTTTTTTTTAA             |                    |   |    |          |
| WB235                                                                           | WB235_Fam_212_68_1 | 1 | 68 | 0.000000 |
| AATAGAGACGAATAAAAATTTAAAATTTTTATTAGTGTCTCTATTTTATAAAGAAAAATACATTTTCAA           |                    |   |    |          |
| WB235                                                                           | WB235_Fam_213_65_1 | 1 | 65 | 0.000000 |
| TATCGAGAGAATNTTCCACATTCACTTTGAATTCNNTTCCAATTTCAATAAGACTCTCAGTAAG                |                    |   |    |          |
| WB235                                                                           | WB235_Fam_214_62_1 | 1 | 62 | 0.000000 |
| GTAGTTTGTAGCTTTAGCCTCAACCAAATTAGCTAAAGCTTGAGTGAGGCTATGGTGATTTT                  |                    |   |    |          |
| WB235                                                                           | WB235_Fam_215_62_1 | 1 | 62 | 0.000000 |
| TGCTAACTAGCTACGGCCAGCTTAGGTGCCGGCTGCACGAGCAGTCTGGTTTAAATGTCGGC                  |                    |   |    |          |
| WB235                                                                           | WB235_Fam_216_60_1 | 1 | 60 | 0.000000 |
| CTAGCTAGATTAAACGCTCTCAAGAGACAGCATGTTGTTGTTGCCACAAGAAGAAGGCT                     |                    |   |    |          |
| WB235                                                                           | WB235_Fam_217_60_1 | 1 | 60 | 0.000000 |
| ATTCAGTTGAGCTCGTTATGTGCGTTGAAGACACAATTGGAGTGGTGCTTGAGGAGCTGG                    |                    |   |    |          |
| WB235                                                                           | WB235_Fam_218_60_1 | 1 | 60 | 0.000000 |
| CTGCTGATTCGGAGAAGAAGGCCCCAGCCAAGAGAGAAGCTGATAAGCCAAAGACTGAAT                    |                    |   |    |          |
| WB235                                                                           | WB235_Fam_219_59_1 | 1 | 59 | 0.000000 |
| CTACAAACTACAAAAGCCTATTTAGCAGACCCACGCCAACTTCTGATGGGTCTGTAGA                      |                    |   |    |          |
| WB235                                                                           | WB235_Fam_220_57_1 | 1 | 57 | 0.000000 |
| GAACTCAACAAGCTGATCAAGAGCAACACCGTGGATCCCAGCTGCCGGACAGAAGG                        |                    |   |    |          |
| WB235                                                                           | WB235_Fam_221_55_1 | 1 | 55 | 0.000000 |
| GGGATTATGGAGTTTCTTTTCTAGAATTTTTTGAAAAATTTTGACAGTTTTTT                           |                    |   |    |          |
| WB235                                                                           | WB235_Fam_222_55_1 | 1 | 55 | 0.000000 |
| AAGAGTCCCCACACACTGAAAGGTTTTAAGGAATTTTTGAGGATTCCTAGGGTT                          |                    |   |    |          |
| WB235                                                                           | WB235_Fam_223_52_1 | 1 | 52 | 0.000000 |
| GCATGTCTTCCAAGCGTTTTGAGCCACGCNTGGGATTTCTATACACGGCTG                             |                    |   |    |          |

|       |                                                     |   |    |          |
|-------|-----------------------------------------------------|---|----|----------|
| WB235 | WB235_Fam_224_51_1                                  | 1 | 51 | 0.000000 |
|       | CCATCCGAAGATCCTCAACCATCTGGCCCACCATCTCCGGGACCAGTGGAC |   |    |          |
| WB235 | WB235_Fam_225_50_1                                  | 1 | 50 | 0.000000 |
|       | ACACATGCTATAACATTGTCTCTTCCCCTAGTGACGAGAGCGGCCGTT    |   |    |          |
| WB235 | WB235_Fam_226_50_1                                  | 1 | 50 | 0.000000 |
|       | GGGCGTGTTTTACATGCCCCCCCCAAAAATTGATGTTTCCACCAAAAT    |   |    |          |
| WB235 | WB235_Fam_227_49_1                                  | 1 | 49 | 0.000000 |
|       | CAATAATTTTAAATTAATTATCGATTTTTCTAAATTTTCCGAAAAAT     |   |    |          |
| WB235 | WB235_Fam_228_49_1                                  | 1 | 49 | 0.000000 |
|       | GCTACGATATCGTAGCACTTTTTTATTTTTCCATATTCACCAAAAAAC    |   |    |          |
| WB235 | WB235_Fam_229_48_1                                  | 1 | 48 | 0.000000 |
| WB235 | WB235_Fam_230_48_1                                  | 1 | 48 | 0.000000 |
| WB235 | WB235_Fam_231_46_1                                  | 1 | 46 | 0.000000 |
| WB235 | WB235_Fam_232_45_1                                  | 1 | 45 | 0.000000 |
| WB235 | WB235_Fam_233_45_1                                  | 1 | 45 | 0.000000 |
| WB235 | WB235_Fam_234_45_1                                  | 1 | 45 | 0.000000 |
| WB235 | WB235_Fam_235_43_1                                  | 1 | 43 | 0.000000 |
| WB235 | WB235_Fam_236_43_1                                  | 1 | 43 | 0.000000 |
| WB235 | WB235_Fam_237_43_1                                  | 1 | 43 | 0.000000 |
| WB235 | WB235_Fam_238_43_1                                  | 1 | 43 | 0.000000 |
| WB235 | WB235_Fam_239_42_1                                  | 1 | 42 | 0.000000 |
| WB235 | WB235_Fam_240_42_1                                  | 1 | 42 | 0.000000 |
| WB235 | WB235_Fam_241_41_1                                  | 1 | 41 | 0.000000 |
| WB235 | WB235_Fam_242_41_1                                  | 1 | 41 | 0.000000 |
| WB235 | WB235_Fam_243_40_1                                  | 1 | 40 | 0.000000 |
| WB235 | WB235_Fam_244_40_1                                  | 1 | 40 | 0.000000 |
| WB235 | WB235_Fam_245_40_1                                  | 1 | 40 | 0.000000 |
| WB235 | WB235_Fam_246_39_1                                  | 1 | 39 | 0.000000 |
| WB235 | WB235_Fam_247_39_1                                  | 1 | 39 | 0.000000 |
| WB235 | WB235_Fam_248_39_1                                  | 1 | 39 | 0.000000 |
| WB235 | WB235_Fam_249_39_1                                  | 1 | 39 | 0.000000 |
| WB235 | WB235_Fam_250_39_1                                  | 1 | 39 | 0.000000 |
| WB235 | WB235_Fam_251_39_1                                  | 1 | 39 | 0.000000 |
| WB235 | WB235_Fam_252_38_1                                  | 1 | 38 | 0.000000 |
| WB235 | WB235_Fam_253_37_1                                  | 1 | 37 | 0.000000 |
| WB235 | WB235_Fam_254_36_1                                  | 1 | 36 | 0.000000 |
| WB235 | WB235_Fam_255_36_1                                  | 1 | 36 | 0.000000 |
| WB235 | WB235_Fam_256_35_1                                  | 1 | 35 | 0.000000 |
| WB235 | WB235_Fam_257_35_1                                  | 1 | 35 | 0.000000 |
| WB235 | WB235_Fam_258_35_1                                  | 1 | 35 | 0.000000 |
| WB235 | WB235_Fam_259_34_1                                  | 1 | 34 | 0.000000 |
| WB235 | WB235_Fam_260_34_1                                  | 1 | 34 | 0.000000 |
| WB235 | WB235_Fam_261_34_1                                  | 1 | 34 | 0.000000 |
| WB235 | WB235_Fam_262_33_1                                  | 1 | 33 | 0.000000 |
| WB235 | WB235_Fam_263_32_1                                  | 1 | 32 | 0.000000 |
| WB235 | WB235_Fam_264_32_1                                  | 1 | 32 | 0.000000 |
| WB235 | WB235_Fam_265_32_1                                  | 1 | 32 | 0.000000 |
| WB235 | WB235_Fam_266_32_1                                  | 1 | 32 | 0.000000 |
| WB235 | WB235_Fam_267_31_1                                  | 1 | 31 | 0.000000 |
| WB235 | WB235_Fam_268_31_1                                  | 1 | 31 | 0.000000 |

TGCTACGTGCCTACAAACAGGCGTAGGCAGCTTTAAAGGTGATGCA  
 GGAGGTGGAGAAAGTGTAGTTCCCGGTGGTCGNGGCTCTTCNAGGGT  
 TGGTAAATTGCCTCCCGGANCACCCACTTTTCTTATTTCCCACTA  
 ACCATCAGGCGGACCACCAGGACCATTGATCCATCAGGAGCACC  
 ACAACTGAATCAACTGCAGCACCAGCACATCTACAGAGACACCT  
 CCACCAGCACTGCTTCGAGTACGACAGAAAGCACTTCGACTCCAT  
 CGAGTTTGGCCTACANCAAATTTGGCAAATTCGGCAAATTTGC  
 GAAACTAGGCCACAGAGTTCAAATTTGATGGCCTAGAAATCTA  
 GGCTCTCGGCTCGCGCCGAGAGCCGAGNTCTACTNAAAGTTTC  
 AGCAGCCGACAGTTGCCGGTTGCCGAAAAATTGCAGTAATTTTC  
 TTTGATCTACAAAAATGCGGGAATTTTCCAGCATTGCTCA  
 AGGTGCTGCTTCCTTTGGAACATCTGCTTGGGTTGGCTCCGA  
 AAATTTTAAACGAGAAGTGGGCGAAAAATCATTCAAAAAATTC  
 GCATTTTTCGCCGATTTTNNATTAATTTTCAGTGAAAAATTC  
 TCCACGTGGAATTTTCAGAAATTTTCNAGAAAAATTTGAAA  
 GAATTTTTCGAATTTCTACTGAATTTTCCAAATTTTCAGC  
 TTTTGCCAAAAATNTGTCAATTTTGTGGAATTTCTNTCAT  
 AATTTCCCGCCAAAAATGAATTTTAAAGAAAAATTTA  
 CCAACTGGAGCCAGCACNATGACCGCTGTTGGAGGAGCA  
 GATTTACGGGCTTAAATCAGTTTCGAAAAAGCTTGTGTC  
 TGGTACGGTAGTTGTAGTGGTAGTGGAGGTGTTGTTGG  
 GTAATTTATAATTTTTTAAAGATGAGTAATATATATGCCC  
 ATTGATACTTTGTCCGGTTTAGACCATCGGCCGAGCTTC  
 AAAATCGATAATTTTCAGTATGCAGTGAAATTTCTGGA  
 ATAATTTTCTTGAGTAATGAGAGACTTTTTCATAAT  
 GATATTTTCATGTTCCGCAAAAGTACCGATTGCGCA  
 CCACCAACTCCAAAAATCAGCTGCTCCATCAGAAGTC  
 AATTGCCGAATTTCTCGTTTTTGGAATTTTACCAA  
 TGTGTAATAAGAAAAATTTCAAATTTTTTTCACGAA  
 GCATTTGCCGATTTTAAAAATTTCTGGCAATTCCA  
 CCGTGCTACTAACCTACCGACCTTGCTGCTGCTT  
 TTGCCGAATTTGCCGTTTGCCGAGCTCGTCAAAT  
 AAGTATTTTTCGGGTTTTTTTGCCGAAATTTCC  
 TAAGAAAAGTTAGGCCACCACAACTTTGGTGAAC  
 AAAATCGAAAAATTTCTCGTTTTTCAATTTTTA  
 GCAATTTTTAGGCTAAAAATCACTAAAAAACT  
 AAATTTGTGAAAAATTTAGGCCCATTTTGCTCA  
 GTGCGTCCGGCGTCCGAAAAAGCGGACGCGT  
 ATCGATTTTTTCGTTAAAAAATCAATAAAAT  
 GCTGATTGGTCGGCGNGGTTGCCCATCNTT



|       |                    |   |    |          |                                  |
|-------|--------------------|---|----|----------|----------------------------------|
| WB235 | WB235_Fam_269_31_1 | 1 | 31 | 0.000000 | GACATCTCGCAGGACATTATAAGAAGCGACC  |
| WB235 | WB235_Fam_270_31_1 | 1 | 31 | 0.000000 | CACGCCTATTTTATGGGCGGAGTCTACAAGC  |
| WB235 | WB235_Fam_271_31_1 | 1 | 31 | 0.000000 | TGCGTCGGAATTNATTCGATCATCGCCGG    |
| WB235 | WB235_Fam_272_31_1 | 1 | 31 | 0.000000 | TCCGATGCATTGCCGATAATCGGAACCTGGT  |
| WB235 | WB235_Fam_273_31_1 | 1 | 31 | 0.000000 | GCAGCCGACGCTATACGGGTCTGATGGAGTA  |
| WB235 | WB235_Fam_274_31_1 | 1 | 31 | 0.000000 | TCTGAGCTACGTA CTCTGTCAAGAACAA    |
| WB235 | WB235_Fam_275_31_1 | 1 | 31 | 0.000000 | GATTTTTTCAGNGAAAANCNAAAAATTTTCG  |
| WB235 | WB235_Fam_276_31_1 | 1 | 31 | 0.000000 | CCAAAAATGACTGAAAATAGTCAAAAAATTAG |
| WB235 | WB235_Fam_277_31_1 | 1 | 31 | 0.000000 | CAAAAAATCGGAAATTTTCACAAAAAATGC   |
| WB235 | WB235_Fam_278_31_1 | 1 | 31 | 0.000000 | TTGGCCCGAGCTCTCTTGACCCCAAGCCCC   |
| WB235 | WB235_Fam_279_31_1 | 1 | 31 | 0.000000 | AAAATTTTGACCCAGAAATCGAAAAATTCGC  |
| WB235 | WB235_Fam_280_31_1 | 1 | 31 | 0.000000 | TCGTTTTTTTCATGAAAAACTCAATTTTCGG  |
| WB235 | WB235_Fam_281_31_1 | 1 | 31 | 0.000000 | GAAAAAGTGCTGAAATCACAATTTTGAAC    |
| WB235 | WB235_Fam_282_30_1 | 1 | 30 | 0.000000 | AATTTGAATTTTCCCGAATTTTNAACGAA    |
| WB235 | WB235_Fam_283_30_1 | 1 | 30 | 0.000000 | TGGTGGAAC TGATT CGGCAGTGGAATGC   |
| WB235 | WB235_Fam_284_30_1 | 1 | 30 | 0.000000 | CCTTGGGCTCCCTGAGCTCCAAATTGTGCT   |
| WB235 | WB235_Fam_285_30_1 | 1 | 30 | 0.000000 | GTCAATTATCAGCTTCTGGTGCTTAGAAGA   |
| WB235 | WB235_Fam_286_30_1 | 1 | 30 | 0.000000 | CAAAC TACAGTAGTACTGTAGTACCATAAC  |
| WB235 | WB235_Fam_287_30_1 | 1 | 30 | 0.000000 | TTCAGGCAGGCATAGGTTACTTTGAAAAAT   |
| WB235 | WB235_Fam_288_30_1 | 1 | 30 | 0.000000 | CCTTG TAGGCAAGGAGGTAGGCGTAGGTCA  |
| WB235 | WB235_Fam_289_30_1 | 1 | 30 | 0.000000 | TTTCAGGCCAATTCNGTCATTTTGGACA     |
| WB235 | WB235_Fam_290_30_1 | 1 | 30 | 0.000000 | AAAAATCAAAAATTAGATGAATTTTCGATTA  |
| WB235 | WB235_Fam_291_30_1 | 1 | 30 | 0.000000 | CTCAAATTTGCACTAAAAATTCCAATTTT    |
| WB235 | WB235_Fam_292_30_1 | 1 | 30 | 0.000000 | ACTACCCAACCGGCTCCGGCAACCAAGTCCA  |
| WB235 | WB235_Fam_293_29_1 | 1 | 29 | 0.000000 | GGCCTAGAAANTTCTATTTGAAAGTTGAT    |
| WB235 | WB235_Fam_294_29_1 | 1 | 29 | 0.000000 | TACATTGCAAGATCTTCTTACTATGTAGG    |
| WB235 | WB235_Fam_295_29_1 | 1 | 29 | 0.000000 | CTCGTCAGTGGGTGGACGAGGAATGAGCG    |
| WB235 | WB235_Fam_296_28_1 | 1 | 28 | 0.000000 | AATGTCGGCTGCTTCTAGAAACCAGGCA     |
| WB235 | WB235_Fam_297_28_1 | 1 | 28 | 0.000000 | TGCCTCGCCTACGTGCTTATTTCAAGGCA    |
| WB235 | WB235_Fam_298_28_1 | 1 | 28 | 0.000000 | CCAAGAGAATTTCAACCACCTGGAATTT     |
| WB235 | WB235_Fam_299_27_1 | 1 | 27 | 0.000000 | TTCCGGCAAATCGGCAAATTGCAAAT       |
| WB235 | WB235_Fam_300_27_1 | 1 | 27 | 0.000000 | ACAATAAAGTACTATGTATTACCGTAT      |
| WB235 | WB235_Fam_301_27_1 | 1 | 27 | 0.000000 | CACTGACCAAAGAAAATATTANACGTG      |
| WB235 | WB235_Fam_302_26_1 | 1 | 26 | 0.000000 | GGCAGGCGTCAAGCAGGCAGGTTTCA       |
| WB235 | WB235_Fam_303_26_1 | 1 | 26 | 0.000000 | ACCTACAGTACCCCTGCTCCTAGAATG      |
| WB235 | WB235_Fam_304_26_1 | 1 | 26 | 0.000000 | TACTGTAGTTTGACCTACTTANGGAT       |
| WB235 | WB235_Fam_305_26_1 | 1 | 26 | 0.000000 | ATTTACGGAGCTTCAAGCTTGTGTCG       |
| WB235 | WB235_Fam_306_26_1 | 1 | 26 | 0.000000 | TGAAATTTCAAAAAATATCGATTTTC       |
| WB235 | WB235_Fam_307_26_1 | 1 | 26 | 0.000000 | AAATTAATCTGTCACTCTAACTTTT        |
| WB235 | WB235_Fam_308_25_1 | 1 | 25 | 0.000000 | GTGCGCTGCTTNCAACCCTGAGTT         |
| WB235 | WB235_Fam_309_25_1 | 1 | 25 | 0.000000 | AAAAATCTGTTCTNNAGAGTCCCTG        |
| WB235 | WB235_Fam_310_24_1 | 1 | 24 | 0.000000 | GTGAGGTACGAGGTGAGGTANGAG         |
| WB235 | WB235_Fam_311_24_1 | 1 | 24 | 0.000000 | AAGCACCACTCCTCCAAC TACAA         |
| WB235 | WB235_Fam_312_24_1 | 1 | 24 | 0.000000 | AAGAAGGATGCTGAAGAGAAGAAG         |
| WB235 | WB235_Fam_313_24_1 | 1 | 24 | 0.000000 | GCTTCTGGAGCTACAGGTTATCCA         |
| WB235 | WB235_Fam_314_24_1 | 1 | 24 | 0.000000 | TCAACAACAACAGGAGAAGCTTCT         |
| WB235 | WB235_Fam_315_24_1 | 1 | 24 | 0.000000 | TTTCAGTTTATCATCATTCTCCTG         |
| WB235 | WB235_Fam_316_24_1 | 1 | 24 | 0.000000 | GGTGGCTGGTCAAAAAGTAAGTT          |
| WB235 | WB235_Fam_317_23_1 | 1 | 23 | 0.000000 | GCATCATAAGGATCATAGTTGAT          |
| WB235 | WB235_Fam_318_23_1 | 1 | 23 | 0.000000 | CGCTGTAAGACCTTCGCTGTAC           |

|       |                    |   |    |          |                       |
|-------|--------------------|---|----|----------|-----------------------|
| WB235 | WB235_Fam_319_23_1 | 1 | 23 | 0.000000 | GCTACAGTACCCCAGCTTGA  |
| WB235 | WB235_Fam_320_23_1 | 1 | 23 | 0.000000 | TTTTCAGAAATAGGTATTT   |
| WB235 | WB235_Fam_321_22_1 | 1 | 22 | 0.000000 | TTAAAAATTTTGTCAGTTG   |
| WB235 | WB235_Fam_322_22_1 | 1 | 22 | 0.000000 | GCACGGCCTGGCGGTCTGA   |
| WB235 | WB235_Fam_323_22_1 | 1 | 22 | 0.000000 | CTACAGTAACCCTAGTATTG  |
| WB235 | WB235_Fam_324_22_1 | 1 | 22 | 0.000000 | AAGCGGTAACGTCGTCATAT  |
| WB235 | WB235_Fam_325_22_1 | 1 | 22 | 0.000000 | TGCTAATTAGCGCGGNTGCG  |
| WB235 | WB235_Fam_326_22_1 | 1 | 22 | 0.000000 | ACGTATACAGGCATATACAC  |
| WB235 | WB235_Fam_327_22_1 | 1 | 22 | 0.000000 | CCGGCGTGGTNTTGAAGCGG  |
| WB235 | WB235_Fam_328_22_1 | 1 | 22 | 0.000000 | TTTGTGGGAGCGACATATAC  |
| WB235 | WB235_Fam_329_21_1 | 1 | 21 | 0.000000 | TGGCCTAGATTNTTTACAGG  |
| WB235 | WB235_Fam_330_21_1 | 1 | 21 | 0.000000 | TCTCCTGGTAAATTTAAAAA  |
| WB235 | WB235_Fam_331_21_1 | 1 | 21 | 0.000000 | ACCACCCCTACAACNACCAC  |
| WB235 | WB235_Fam_332_21_1 | 1 | 21 | 0.000000 | AACCTTTTGGCAATTTTCCAA |
| WB235 | WB235_Fam_333_21_1 | 1 | 21 | 0.000000 | TGTGCCCTGGAAGCTGGCAG  |
| WB235 | WB235_Fam_334_21_1 | 1 | 21 | 0.000000 | CTACGTAAGAGTAGCGCAGGA |
| WB235 | WB235_Fam_335_21_1 | 1 | 21 | 0.000000 | AATCTAGCCAGACGCACACCT |
| WB235 | WB235_Fam_336_21_1 | 1 | 21 | 0.000000 | CAATTTTCTGTTNAACTTTGA |
| WB235 | WB235_Fam_337_21_1 | 1 | 21 | 0.000000 | AAGTTTACTTTGATTTTTTT  |
| WB235 | WB235_Fam_338_21_1 | 1 | 21 | 0.000000 | GGCAATTTTCCAGTGCAATTC |
| WB235 | WB235_Fam_339_21_1 | 1 | 21 | 0.000000 | CCATAGGTGGAAGATCTNATA |
| WB235 | WB235_Fam_340_21_1 | 1 | 21 | 0.000000 | GATTTACGGGGTGAACATGTG |
| WB235 | WB235_Fam_341_21_1 | 1 | 21 | 0.000000 | TTGGTGACAATGTGGAAACAA |
| WB235 | WB235_Fam_342_21_1 | 1 | 21 | 0.000000 | TTCTAATTCGACGCGCATNGT |
| WB235 | WB235_Fam_343_21_1 | 1 | 21 | 0.000000 | CTAATTAGCGTCGCTTCCNTT |
| WB235 | WB235_Fam_344_21_1 | 1 | 21 | 0.000000 | AAAAATCGATAAAATTTGGAN |
| WB235 | WB235_Fam_345_21_1 | 1 | 21 | 0.000000 | CACACGAGCTTGAGAGCCCGG |
| WB235 | WB235_Fam_346_21_1 | 1 | 21 | 0.000000 | TATTTTCAAAAAATTTAAAAA |
| WB235 | WB235_Fam_347_21_1 | 1 | 21 | 0.000000 | ACCCCGATTTTCACCCAAAAA |
| WB235 | WB235_Fam_348_21_1 | 1 | 21 | 0.000000 | CTCAATTCAATCAAGGAAATC |
| WB235 | WB235_Fam_349_21_1 | 1 | 21 | 0.000000 | CCATGTAGCTTCAAAATTNCT |
| WB235 | WB235_Fam_350_21_1 | 1 | 21 | 0.000000 | TGTCCGTGATGATCATGNGCA |
| WB235 | WB235_Fam_351_21_1 | 1 | 21 | 0.000000 | GGTGGACCCANGGGTTCCTAG |
| WB235 | WB235_Fam_352_20_1 | 1 | 20 | 0.000000 | CTATCGCCTGCTATCGCCTA  |
| WB235 | WB235_Fam_353_20_1 | 1 | 20 | 0.000000 | ATTTGACCTACTTTTAAAAA  |
| WB235 | WB235_Fam_354_19_1 | 1 | 19 | 0.000000 | GTA                   |
| WB235 | WB235_Fam_355_19_1 | 1 | 19 | 0.000000 | CCCTGATACCCCTAGTCC    |
| WB235 | WB235_Fam_356_19_1 | 1 | 19 | 0.000000 | TATGGTGCATCTAACTAGT   |
| WB235 | WB235_Fam_357_19_1 | 1 | 19 | 0.000000 | GCCTCACTCAAAATCCTCA   |
| WB235 | WB235_Fam_358_18_1 | 1 | 18 | 0.000000 | AAAAGTTACAGTGTCCTT    |
| WB235 | WB235_Fam_359_18_1 | 1 | 18 | 0.000000 | TTGTAGATCAACGGGGTC    |
| WB235 | WB235_Fam_360_18_1 | 1 | 18 | 0.000000 | GGAGGTCCAGGTACCCCG    |
| WB235 | WB235_Fam_361_18_1 | 1 | 18 | 0.000000 | TAAATAAGTGGCTATAAT    |
| WB235 | WB235_Fam_362_18_1 | 1 | 18 | 0.000000 | ACTACTGTATCNCAGGAG    |
| WB235 | WB235_Fam_363_18_1 | 1 | 18 | 0.000000 | CCTTCGCCTACCTACGTG    |
| WB235 | WB235_Fam_364_18_1 | 1 | 18 | 0.000000 | TTTTTTGATAATTCCTGA    |
| WB235 | WB235_Fam_365_18_1 | 1 | 18 | 0.000000 | AAATATTCTTATTTTCAG    |
| WB235 | WB235_Fam_366_18_1 | 1 | 18 | 0.000000 | CCTGGTTGTCCNTCTNNT    |
| WB235 | WB235_Fam_367_18_1 | 1 | 18 | 0.000000 | TTTCATAAGAAGTAAATN    |
| WB235 | WB235_Fam_368_18_1 | 1 | 18 | 0.000000 | CATTGTCACTTCTTCTC     |

|       |                    |   |    |          |                    |
|-------|--------------------|---|----|----------|--------------------|
| WB235 | WB235_Fam_369_18_1 | 1 | 18 | 0.000000 | AAGCCTATGCCTTTCCCA |
| WB235 | WB235_Fam_370_17_1 | 1 | 17 | 0.000000 | ACTTGGTACATAGGCCA  |
| WB235 | WB235_Fam_371_17_1 | 1 | 17 | 0.000000 | ATTTTTTCCGCAAGTAG  |
| WB235 | WB235_Fam_372_17_1 | 1 | 17 | 0.000000 | AAAATCAAACCGGCGGA  |
| WB235 | WB235_Fam_373_17_1 | 1 | 17 | 0.000000 | AAATGCCAAAANTGCCA  |
| WB235 | WB235_Fam_374_17_1 | 1 | 17 | 0.000000 | TAACCTGACTGCTACAG  |
| WB235 | WB235_Fam_375_17_1 | 1 | 17 | 0.000000 | GAATTAGAAAAATTTGA  |
| WB235 | WB235_Fam_376_17_1 | 1 | 17 | 0.000000 | TTGCAAGAAAAATCTGCA |
| WB235 | WB235_Fam_377_17_1 | 1 | 17 | 0.000000 | TTTAAACGTGACCTAGT  |
| WB235 | WB235_Fam_378_16_1 | 1 | 16 | 0.000000 | TGATCTGATGATCTGA   |
| WB235 | WB235_Fam_379_16_1 | 1 | 16 | 0.000000 | AATACGGGAATACGGG   |
| WB235 | WB235_Fam_380_16_1 | 1 | 16 | 0.000000 | TTATAGTGTTATAGTG   |
| WB235 | WB235_Fam_381_16_1 | 1 | 16 | 0.000000 | TGTATATATATATATA   |
| WB235 | WB235_Fam_382_16_1 | 1 | 16 | 0.000000 | AAAAATTATTGAATAC   |
| WB235 | WB235_Fam_383_16_1 | 1 | 16 | 0.000000 | GAATAATATTGGAGAA   |
| WB235 | WB235_Fam_384_16_1 | 1 | 16 | 0.000000 | CTTAGATCTCAATTCC   |
| WB235 | WB235_Fam_385_16_1 | 1 | 16 | 0.000000 | AGAGAGTATAGATTAG   |
| WB235 | WB235_Fam_386_15_1 | 1 | 15 | 0.000000 | CGACCTGCGACCTAG    |
| WB235 | WB235_Fam_387_15_1 | 1 | 15 | 0.000000 | CACAGGAGGCTGGGA    |
| WB235 | WB235_Fam_388_14_1 | 1 | 14 | 0.000000 | AGCTTGAAGCTTGG     |
| WB235 | WB235_Fam_389_14_1 | 1 | 14 | 0.000000 | GAAGGATCGGGCCG     |
| WB235 | WB235_Fam_390_14_1 | 1 | 14 | 0.000000 | TTACCAAAATCTAA     |
| WB235 | WB235_Fam_391_13_1 | 1 | 13 | 0.000000 | TTGGGGTGGGCCT      |
| WB235 | WB235_Fam_392_12_1 | 1 | 12 | 0.000000 | AATACCAACCAC       |
| WB235 | WB235_Fam_393_12_1 | 1 | 12 | 0.000000 | AGTTATATAGTA       |
| WB235 | WB235_Fam_394_12_1 | 1 | 12 | 0.000000 | CATTGACTTGAG       |
| WB235 | WB235_Fam_395_11_1 | 1 | 11 | 0.000000 | TTGTTTACAAG        |
| WB235 | WB235_Fam_396_11_1 | 1 | 11 | 0.000000 | TACCTACTAGA        |
| WB235 | WB235_Fam_397_11_1 | 1 | 11 | 0.000000 | AGATACACTTC        |
| WB235 | WB235_Fam_398_11_1 | 1 | 11 | 0.000000 | TTTCAGGCCTA        |
| WB235 | WB235_Fam_399_10_1 | 1 | 10 | 0.000000 | GATTTTCATA         |
| WB235 | WB235_Fam_400_10_1 | 1 | 10 | 0.000000 | CAGCAGAGTG         |
| WB235 | WB235_Fam_401_10_1 | 1 | 10 | 0.000000 | AACTTTCGAA         |
| WB235 | WB235_Fam_402_10_1 | 1 | 10 | 0.000000 | TGGCGAAAGC         |
